# Supplementary material for: MEIS-mediated suppression of human prostate cancer growth and metastasis through HOXB13-dependent regulation of proteoglycans
Source: eLife. 2020 Jun 18;9:e53600. doi: 10.7554/eLife.53600 (PMC7371429; doi:10.7554/eLife.53600)
Supplement: Supplementary file 1. — Peaks identified by MACS2 in LV-MEIS1 ChIP-seq samples vs. input DNA were annotated to the nearest transcription start site (TSS) using HOMER. [file elife-53600-supp1.xlsx]

## Sheet: annotated_MEIS1_in_LV-MEIS1
PeakID (cmd=annotatePeaks.pl MEIS1_in_LV-MEIS1_summits.bed hg38)	Chr	Start	End	Strand	Peak Score	Focus Ratio/Region Size	Annotation	Detailed Annotation	Distance to TSS	Nearest PromoterID	Entrez ID	Nearest Unigene	Nearest Refseq	Nearest Ensembl	Gene Name	Gene Alias	Gene Description	Gene Type
MEIS1_in_LV-MEIS1_peak_2662	chr19	38862784	38862784	+	65.0757	NA	Intergenic	LTR35A|LTR|ERV1	-10445	NM_001005335	3191	Hs.644906	NM_001533	ENSG00000104824	HNRNPL	HNRPL|P/OKcl.14|hnRNP-L	heterogeneous nuclear ribonucleoprotein L	protein-coding
MEIS1_in_LV-MEIS1_peak_819	chr10	88440205	88440205	+	63.7715	NA	intron (NM_001031709, intron 4 of 6)	MamTip2|DNA|hAT-Tip100	143120	NM_001031709	55328	Hs.149849	NM_018363	ENSG00000184719	RNLS	C10orf59|RENALASE	renalase, FAD dependent amine oxidase	protein-coding
MEIS1_in_LV-MEIS1_peak_5131	chr7	76294816	76294816	+	63.7715	NA	Intergenic	Intergenic	-7742	NM_001540	3315	Hs.520973	NM_001540	ENSG00000106211	HSPB1	CMT2F|HEL-S-102|HMN2B|HS.76067|HSP27|HSP28|Hsp25|SRP27	heat shock protein family B (small) member 1	protein-coding
MEIS1_in_LV-MEIS1_peak_3109	chr2	226379543	226379543	+	60.7155	NA	Intergenic	Intergenic	236749	NR_046102	646736	Hs.712836	NR_046102		LOC646736	-	uncharacterized LOC646736	ncRNA
MEIS1_in_LV-MEIS1_peak_4334	chr5	71653281	71653281	+	60.4218	NA	intron (NM_022132, intron 16 of 16)	intron (NM_022132, intron 16 of 16)	-65882	NM_004291	9607	Hs.1707	NM_004291	ENSG00000164326	CARTPT	CART	CART prepropeptide	protein-coding
MEIS1_in_LV-MEIS1_peak_1313	chr12	54359334	54359334	+	60.1722	NA	intron (NR_120487, intron 1 of 3)	intron (NR_120487, intron 1 of 3)	5152	NM_020370	53831	Hs.306199	NM_020370	ENSG00000139572	GPR84	EX33|GPCR4	G protein-coupled receptor 84	protein-coding
MEIS1_in_LV-MEIS1_peak_5692	chr9	31776609	31776609	+	59.8204	NA	Intergenic	HERVK11-int|LTR|ERVK	-395119	NR_135134	101929620	Hs.547175	NR_135134	ENSG00000260720	LINC01243	-	long intergenic non-protein coding RNA 1243	ncRNA
MEIS1_in_LV-MEIS1_peak_5075	chr7	51607018	51607018	+	59.3202	NA	Intergenic	MIR|SINE|MIR	-290157	NM_001346444	23242	Hs.99141	NM_015198	ENSG00000106078	COBL	-	cordon-bleu WH2 repeat protein	protein-coding
MEIS1_in_LV-MEIS1_peak_5709	chr9	34652282	34652282	+	59.3202	NA	promoter-TSS (NM_001142784)	promoter-TSS (NM_001142784)	97	NM_001142784	3590	Hs.591088	NM_004512	ENSG00000137070	IL11RA	CRSDA	interleukin 11 receptor subunit alpha	protein-coding
MEIS1_in_LV-MEIS1_peak_5105	chr7	66125502	66125502	+	58.8464	NA	intron (NM_001040648, intron 1 of 2)	intron (NM_001040648, intron 1 of 2)	10684	NM_001040647	27297	Hs.300684	NM_014478	ENSG00000241258	CRCP	CGRP-RCP|CGRPRCP|RCP|RCP9|RPC9	CGRP receptor component	protein-coding
MEIS1_in_LV-MEIS1_peak_4463	chr5	126875539	126875539	+	58.4647	NA	intron (NM_178450, intron 4 of 4)	intron (NM_178450, intron 4 of 4)	98386	NM_001198557	4001	Hs.89497	NM_005573	ENSG00000113368	LMNB1	ADLD|LMN|LMN2|LMNB	lamin B1	protein-coding
MEIS1_in_LV-MEIS1_peak_4865	chr6	142593096	142593096	+	56.8992	NA	intron (NR_027312, intron 1 of 2)	L1ME2z|LINE|L1	44740	NR_027311	153910	Hs.350819	NR_027311	ENSG00000236366	LOC153910	-	uncharacterized LOC153910	ncRNA
MEIS1_in_LV-MEIS1_peak_5230	chr7	100022883	100022883	+	56.1843	NA	intron (NM_001346581, intron 2 of 6)	intron (NM_001346581, intron 2 of 6)	7331	NM_003439	7586	Hs.615360	NM_003439	ENSG00000106261	ZKSCAN1	KOX18|PHZ-37|ZNF139|ZNF36|ZSCAN33	zinc finger with KRAB and SCAN domains 1	protein-coding
MEIS1_in_LV-MEIS1_peak_5017	chr7	27151026	27151026	+	55.8385	NA	intron (NR_038831, intron 1 of 2)	CpG	-3252	NM_024014	3203	Hs.679517	NM_024014	ENSG00000106006	HOXA6	HOX1|HOX1.2|HOX1B	homeobox A6	protein-coding
MEIS1_in_LV-MEIS1_peak_614	chr1	229844837	229844837	+	55.6334	NA	Intergenic	MER70B|LTR|ERVL	-157880	NR_135116	101927532	Hs.40183	NR_135116	ENSG00000228058	LINC01736	-	long intergenic non-protein coding RNA 1736	ncRNA
MEIS1_in_LV-MEIS1_peak_4434	chr5	117881110	117881110	+	55.4959	NA	intron (NR_104997, intron 1 of 2)	intron (NR_104997, intron 1 of 2)	150749	NR_104997	102467224	Hs.134230	NR_104997		LINC02147	-	long intergenic non-protein coding RNA 2147	ncRNA
MEIS1_in_LV-MEIS1_peak_1259	chr12	47245896	47245896	+	55.3532	NA	Intergenic	Intergenic	-29453	NR_026544	100233209	Hs.657722	NR_026544	ENSG00000247774	PCED1B-AS1	-	PCED1B antisense RNA 1	ncRNA
MEIS1_in_LV-MEIS1_peak_4781	chr6	107228938	107228938	+	54.767	NA	intron (NM_020381, intron 4 of 7)	Eulor6C|DNA?|DNA?	-114506	NM_001080450	57673	Hs.418045	NM_001080450	ENSG00000178409	BEND3	KIAA1553	BEN domain containing 3	protein-coding
MEIS1_in_LV-MEIS1_peak_4228	chr5	5422348	5422348	+	54.767	NA	promoter-TSS (NM_015325)	promoter-TSS (NM_015325)	-325	NM_015325	23379	Hs.449296	NM_015325	ENSG00000164151	ICE1	KIAA0947	interactor of little elongation complex ELL subunit 1	protein-coding
MEIS1_in_LV-MEIS1_peak_3467	chr3	53145551	53145551	+	54.4967	NA	Intergenic	Intergenic	-15097	NM_052859	91869	Hs.631910	NM_052859	ENSG00000163933	RFT1	CDG1N	RFT1 homolog	protein-coding
MEIS1_in_LV-MEIS1_peak_4432	chr5	117486968	117486968	+	54.3872	NA	intron (NR_046089, intron 3 of 5)	intron (NR_046089, intron 3 of 5)	71456	NR_046089	728342	Hs.434420	NR_046089		LINC00992	-	long intergenic non-protein coding RNA 992	ncRNA
MEIS1_in_LV-MEIS1_peak_2137	chr16	35463659	35463659	+	53.5262	NA	Intergenic	L1MB2|LINE|L1	16937	NR_026980	146481	Hs.316564	NR_026980		FRG2DP	-	FSHD region gene 2 family member D, pseudogene	pseudo
MEIS1_in_LV-MEIS1_peak_4601	chr6	10419672	10419672	+	53.1482	NA	promoter-TSS (NM_001042425)	promoter-TSS (NM_001042425)	-108	NM_001042425	7020	Hs.519880	NM_003220	ENSG00000137203	TFAP2A	AP-2|AP-2alpha|AP2TF|BOFS|TFAP2	transcription factor AP-2 alpha	protein-coding
MEIS1_in_LV-MEIS1_peak_3412	chr3	24658344	24658344	+	53.1482	NA	Intergenic	L1MA5A|LINE|L1	-136909	NR_039955
MEIS1_in_LV-MEIS1_peak_5441	chr8	27365976	27365976	+	53.1482	NA	intron (NM_173175, intron 1 of 29)	intron (NM_173175, intron 1 of 29)	40412	NM_173175	2185	Hs.491322	NM_004103	ENSG00000120899	PTK2B	CADTK|CAKB|FADK2|FAK2|PKB|PTK|PYK2|RAFTK	protein tyrosine kinase 2 beta	protein-coding
MEIS1_in_LV-MEIS1_peak_668	chr1	247210996	247210996	+	52.993	NA	Intergenic	CpG	-8936	NR_037480	100500849		NR_037480	ENSG00000283881	MIR3916	mir-3916	microRNA 3916	ncRNA
MEIS1_in_LV-MEIS1_peak_1331	chr12	56725421	56725421	+	52.304	NA	promoter-TSS (NM_005594)	promoter-TSS (NM_005594)	121	NM_001320193	4666	Hs.505735	NM_005594	ENSG00000196531	NACA	HSD48|NAC-alpha|NACA1|skNAC	nascent polypeptide associated complex subunit alpha	protein-coding
MEIS1_in_LV-MEIS1_peak_796	chr10	75739803	75739803	+	52.304	NA	intron (NR_132791, intron 1 of 2)	intron (NR_132791, intron 1 of 2)	27348	NR_132791	105378367	Hs.464836	NR_132791		LOC105378367	-	uncharacterized LOC105378367	ncRNA
MEIS1_in_LV-MEIS1_peak_2696	chr19	48333119	48333119	+	52.304	NA	non-coding (NR_130317, exon 6 of 6)	non-coding (NR_130317, exon 6 of 6)	7120	NM_001313905	2014	Hs.9999	NM_001425	ENSG00000142227	EMP3	YMP	epithelial membrane protein 3	protein-coding
MEIS1_in_LV-MEIS1_peak_799	chr10	76114178	76114178	+	52.2182	NA	intron (NR_131178, intron 6 of 7)	intron (NR_131178, intron 6 of 7)	331417	NM_032024	83938	Hs.118161	NM_032024	ENSG00000148655	LRMDA	C10orf11|CDA017	leucine rich melanocyte differentiation associated	protein-coding
MEIS1_in_LV-MEIS1_peak_4411	chr5	110058242	110058242	+	51.9248	NA	Intergenic	Intergenic	175060	NR_033175	100289673	Hs.368405	NR_033175		LINC01848	-	long intergenic non-protein coding RNA 1848	ncRNA
MEIS1_in_LV-MEIS1_peak_5087	chr7	64313828	64313828	+	51.6949	NA	promoter-TSS (NM_001294255)	promoter-TSS (NM_001294255)	-45	NM_001170905	728927	Hs.386162	NM_001170905	ENSG00000234444	ZNF736	-	zinc finger protein 736	protein-coding
MEIS1_in_LV-MEIS1_peak_5068	chr7	50822320	50822320	+	51.073	NA	Intergenic	MER134|DNA?|DNA?	-28858	NM_001001555	2887	Hs.164060	NM_005311	ENSG00000106070	GRB10	GRB-IR|Grb-10|IRBP|MEG1|RSS	growth factor receptor bound protein 10	protein-coding
MEIS1_in_LV-MEIS1_peak_963	chr11	49283484	49283484	+	50.3248	NA	Intergenic	Intergenic	-74814	NM_004476	2346	Hs.551896	NM_004476	ENSG00000086205	FOLH1	FGCP|FOLH|GCP2|GCPII|NAALAD1|NAALAdase|PSM|PSMA|mGCP	folate hydrolase 1	protein-coding
MEIS1_in_LV-MEIS1_peak_1009	chr11	67582561	67582561	+	49.9128	NA	Intergenic	L1M5|LINE|L1	-1034	NM_000852	2950	Hs.523836	NM_000852	ENSG00000084207	GSTP1	DFN7|FAEES3|GST3|GSTP|HEL-S-22|PI	glutathione S-transferase pi 1	protein-coding
MEIS1_in_LV-MEIS1_peak_631	chr1	234724370	234724370	+	49.7064	NA	intron (NR_038856, intron 1 of 2)	intron (NR_038856, intron 1 of 2)	328	NR_038856	100506810	Hs.586634	NR_038856	ENSG00000227630	LINC01132	-	long intergenic non-protein coding RNA 1132	ncRNA
MEIS1_in_LV-MEIS1_peak_632	chr1	234861908	234861908	+	49.6052	NA	Intergenic	L1ME4b|LINE|L1	102091	NR_125945	101927851	Hs.520684	NR_125945	ENSG00000238005	LOC101927851	-	uncharacterized LOC101927851	ncRNA
MEIS1_in_LV-MEIS1_peak_3470	chr3	53485158	53485158	+	49.4566	NA	Intergenic	Intergenic	-9891	NM_001128840	776	Hs.476358	NM_000720	ENSG00000157388	CACNA1D	CACH3|CACN4|CACNL1A2|CCHL1A2|Cav1.3|PASNA|SANDD	calcium voltage-gated channel subunit alpha1 D	protein-coding
MEIS1_in_LV-MEIS1_peak_2990	chr2	180258399	180258399	+	49.4566	NA	Intergenic	Intergenic	-251346	NM_020943	57703	Hs.311363	NM_020943	ENSG00000163510	CWC22	EIF4GL|NCM|fSAPb	CWC22 spliceosome associated protein homolog	protein-coding
MEIS1_in_LV-MEIS1_peak_5855	chr9	127969731	127969731	+	49.4566	NA	intron (NM_001035254, intron 1 of 10)	intron (NM_001035254, intron 1 of 10)	10802	NM_001035254	399665	Hs.535972	NM_203305	ENSG00000167106	FAM102A	C9orf132|EEIG1|SYM-3A|bA203J24.7	family with sequence similarity 102 member A	protein-coding
MEIS1_in_LV-MEIS1_peak_2827	chr2	51080145	51080145	+	49.4566	NA	intron (NR_135237, intron 2 of 10)	intron (NR_135237, intron 2 of 10)	47544	NR_135237	730100	Hs.640140	NR_135237	ENSG00000231918	LOC730100	-	uncharacterized LOC730100	ncRNA
MEIS1_in_LV-MEIS1_peak_4852	chr6	139486110	139486110	+	49.4566	NA	Intergenic	Intergenic	-11514	NR_033919	645434	Hs.666240	NR_033919	ENSG00000238099	LINC01625	-	long intergenic non-protein coding RNA 1625	ncRNA
MEIS1_in_LV-MEIS1_peak_3655	chr3	133986366	133986366	+	49.2775	NA	intron (NM_005630, intron 1 of 13)	intron (NM_005630, intron 1 of 13)	43710	NM_005630	6578	Hs.518270	NM_005630	ENSG00000174640	SLCO2A1	MATR1|OATP2A1|PGT|PHOAR2|SLC21A2	solute carrier organic anion transporter family member 2A1	protein-coding
MEIS1_in_LV-MEIS1_peak_4355	chr5	81751086	81751086	+	49.2383	NA	5' UTR (NM_001256732, exon 1 of 17)	5' UTR (NM_001256732, exon 1 of 17)	167	NM_001256736	23635	Hs.102735	NM_012446	ENSG00000145687	SSBP2	HSPC116|SOSS-B2	single stranded DNA binding protein 2	protein-coding
MEIS1_in_LV-MEIS1_peak_284	chr1	148642535	148642535	+	48.8692	NA	Intergenic	Intergenic	-46818	NM_015383	25832	Hs.534675	NM_015383	ENSG00000270629	NBPF14	DJ328E19.C1.1|NBPF	NBPF member 14	protein-coding
MEIS1_in_LV-MEIS1_peak_5664	chr9	10969559	10969559	+	48.6459	NA	Intergenic	Intergenic	356353	NR_110696	101929428	Hs.434446	NR_110696	ENSG00000226717	PTPRD-AS2	-	PTPRD antisense RNA 2 (head to head)	ncRNA
MEIS1_in_LV-MEIS1_peak_4760	chr6	92895056	92895056	+	48.6022	NA	Intergenic	Intergenic	524526	NM_001288629	2045	Hs.73962	NM_004440	ENSG00000135333	EPHA7	EHK-3|EHK3|EK11|HEK11	EPH receptor A7	protein-coding
MEIS1_in_LV-MEIS1_peak_3236	chr21	16080088	16080088	+	48.3601	NA	intron (NR_111005, intron 1 of 6)	L2a|LINE|L2	8974	NR_111004	388815	Hs.473394	NR_027790		MIR99AHG	C21orf34|C21orf35|LINC00478|MONC	mir-99a-let-7c cluster host gene	ncRNA
MEIS1_in_LV-MEIS1_peak_2481	chr18	59054979	59054979	+	48.233	NA	Intergenic	Intergenic	19300	NR_024021	390858	Hs.716280	NR_024021		OACYLP	ACYL3P	O-acyltransferase like, pseudogene	pseudo
MEIS1_in_LV-MEIS1_peak_1464	chr12	93784718	93784718	+	48.136	NA	intron (NM_001320100, intron 2 of 2)	intron (NM_001320100, intron 2 of 2)	-46895	NR_110092	101928731	Hs.659971	NR_110092	ENSG00000258274	LOC101928731	-	uncharacterized LOC101928731	ncRNA
MEIS1_in_LV-MEIS1_peak_1108	chr11	113906216	113906216	+	47.937	NA	intron (NM_006028, intron 1 of 8)	intron (NM_006028, intron 1 of 8)	1420	NM_006028	9177	Hs.241377	NM_006028	ENSG00000149305	HTR3B	5-HT3B	5-hydroxytryptamine receptor 3B	protein-coding
MEIS1_in_LV-MEIS1_peak_4479	chr5	128353621	128353621	+	47.937	NA	intron (NM_001999, intron 20 of 64)	intron (NM_001999, intron 20 of 64)	184421	NM_001999	2201	Hs.519294	NM_001999	ENSG00000138829	FBN2	CCA|DA9|EOMD	fibrillin 2	protein-coding
MEIS1_in_LV-MEIS1_peak_2984	chr2	179446922	179446922	+	47.648	NA	intron (NM_001113397, intron 4 of 7)	intron (NM_001113397, intron 4 of 7)	115666	NM_001113398	151126	Hs.655005	NM_152520	ENSG00000144331	ZNF385B	ZNF533	zinc finger protein 385B	protein-coding
MEIS1_in_LV-MEIS1_peak_5153	chr7	81638439	81638439	+	47.5957	NA	intron (NR_126025, intron 1 of 10)	intron (NR_126025, intron 1 of 10)	-12223	NR_126026	100128317	Hs.571267	NR_126025	ENSG00000233491	LOC100128317	-	uncharacterized LOC100128317	ncRNA
MEIS1_in_LV-MEIS1_peak_1311	chr12	54033703	54033703	+	47.4587	NA	promoter-TSS (NR_030753)	promoter-TSS (NR_030753)	-247	NR_030753	693200		NR_030753	ENSG00000207571	MIR615	MIRN615|hsa-mir-615|mir-615	microRNA 615	ncRNA
MEIS1_in_LV-MEIS1_peak_2799	chr2	30218191	30218191	+	47.4501	NA	Intergenic	Intergenic	-13340	NM_030915	81606	Hs.567598	NM_030915	ENSG00000213626	LBH	-	limb bud and heart development	protein-coding
MEIS1_in_LV-MEIS1_peak_2225	chr16	89171644	89171644	+	47.1708	NA	promoter-TSS (NM_004933)	promoter-TSS (NM_004933)	-111	NM_004933	1013	Hs.148090	NM_004933	ENSG00000129910	CDH15	CDH14|CDH3|CDHM|MCAD|MRD3	cadherin 15	protein-coding
MEIS1_in_LV-MEIS1_peak_3945	chr4	70779131	70779131	+	47.0162	NA	intron (NM_001345840, intron 9 of 13)	intron (NM_001345840, intron 9 of 13)	44785	NM_001345840	22902	Hs.740904	NM_014961	ENSG00000018189	RUFY3	RIPX|SINGAR1|ZFYVE30	RUN and FYVE domain containing 3	protein-coding
MEIS1_in_LV-MEIS1_peak_1822	chr14	32308340	32308340	+	47.0162	NA	Intergenic	Intergenic	-20933	NM_004274	9472	Hs.509083	NM_004274	ENSG00000151320	AKAP6	ADAP100|ADAP6|AKAP100|PRKA6|mAKAP	A-kinase anchoring protein 6	protein-coding
MEIS1_in_LV-MEIS1_peak_3930	chr4	64145220	64145220	+	47.0162	NA	Intergenic	HERVK11-int|LTR|ERVK	264240	NM_001010874	253017	Hs.227752	NM_001010874	ENSG00000205678	TECRL	CPVT3|GPSN2L|SRD5A2L2|TERL	trans-2,3-enoyl-CoA reductase like	protein-coding
MEIS1_in_LV-MEIS1_peak_4500	chr5	137815816	137815816	+	47.0162	NA	Intergenic	Intergenic	14623	NR_002713	4888	Hs.643466	NR_002713	ENSG00000226306	NPY6R	NPY1RL|NPY6RP|PP2|Y2B	neuropeptide Y receptor Y6 (pseudogene)	pseudo
MEIS1_in_LV-MEIS1_peak_3489	chr3	67518384	67518384	+	46.9559	NA	intron (NM_001177599, intron 5 of 10)	intron (NM_001177599, intron 5 of 10)	136230	NM_001177599	8801	Hs.644919	NM_003848	ENSG00000172340	SUCLG2	G-SCS|GBETA|GTPSCS	succinate-CoA ligase GDP-forming beta subunit	protein-coding
MEIS1_in_LV-MEIS1_peak_266	chr1	146191832	146191832	+	46.7401	NA	intron (NM_203458, intron 1 of 4)	intron (NM_203458, intron 1 of 4)	37200	NM_203458	388677	Hs.655156	NM_203458	ENSG00000264343	NOTCH2NL	N2N	notch 2 N-terminal like	protein-coding
MEIS1_in_LV-MEIS1_peak_1363	chr12	63806275	63806275	+	46.7401	NA	intron (NM_001278237, intron 5 of 5)	L2a|LINE|L2	15881	NR_126167	104169670	Hs.735874	NR_126167	ENSG00000255850	RXYLT1-AS1	TMEM5-AS1	RXYLT1 antisense RNA 1	ncRNA
MEIS1_in_LV-MEIS1_peak_5322	chr7	120951158	120951158	+	46.6939	NA	intron (NM_019071, intron 1 of 11)	CpG	395	NM_198267	54556	Hs.489811	NM_019071	ENSG00000071243	ING3	Eaf4|ING2|MEAF4|p47ING3	inhibitor of growth family member 3	protein-coding
MEIS1_in_LV-MEIS1_peak_3939	chr4	69280294	69280294	+	46.5245	NA	promoter-TSS (NM_001207004)	promoter-TSS (NM_001207004)	-205	NM_053039	54490	Hs.653154	NM_053039	ENSG00000135226	UGT2B28	-	UDP glucuronosyltransferase family 2 member B28	protein-coding
MEIS1_in_LV-MEIS1_peak_3897	chr4	35040013	35040013	+	46.5245	NA	Intergenic	L1ME1|LINE|L1	-1000120	NR_125902	101928622	Hs.631687	NR_125902	ENSG00000250954	LOC101928622	-	uncharacterized LOC101928622	ncRNA
MEIS1_in_LV-MEIS1_peak_4358	chr5	83265486	83265486	+	46.3802	NA	intron (NM_022550, intron 7 of 7)	intron (NM_022550, intron 7 of 7)	-188033	NM_174909	153339	Hs.355606	NM_174909	ENSG00000174695	TMEM167A	TMEM167	transmembrane protein 167A	protein-coding
MEIS1_in_LV-MEIS1_peak_454	chr1	185697052	185697052	+	46.2906	NA	Intergenic	Intergenic	-37499	NM_031935	83872	Hs.58877	NM_031935	ENSG00000143341	HMCN1	ARMD1|FBLN6|FIBL-6|FIBL6	hemicentin 1	protein-coding
MEIS1_in_LV-MEIS1_peak_4214	chr4	183758327	183758327	+	46.2394	NA	Intergenic	Intergenic	-39695	NR_132761	56977	Hs.21958	NM_020225	ENSG00000173320	STOX2	-	storkhead box 2	protein-coding
MEIS1_in_LV-MEIS1_peak_1626	chr13	38002800	38002800	+	46.1957	NA	Intergenic	Intergenic	-132998	NM_001135957	7223	Hs.262960	NM_003306	ENSG00000133107	TRPC4	HTRP-4|HTRP4|TRP4	transient receptor potential cation channel subfamily C member 4	protein-coding
MEIS1_in_LV-MEIS1_peak_4147	chr4	141853534	141853534	+	45.8021	NA	Intergenic	MER68|LTR|ERVL	216938	NR_037840	3600	Hs.168132	NM_000585	ENSG00000164136	IL15	IL-15	interleukin 15	protein-coding
MEIS1_in_LV-MEIS1_peak_5243	chr7	101883011	101883011	+	45.8021	NA	intron (NM_181552, intron 1 of 23)	intron (NM_181552, intron 1 of 23)	65409	NM_181552	1523	Hs.191482	NM_001913	ENSG00000257923	CUX1	CASP|CDP|CDP/Cut|CDP1|COY1|CUTL1|CUX|Clox|Cux/CDP|GOLIM6|Nbla10317|p100|p110|p200|p75	cut like homeobox 1	protein-coding
MEIS1_in_LV-MEIS1_peak_784	chr10	75022353	75022353	+	45.8021	NA	intron (NM_012330, intron 16 of 17)	intron (NM_012330, intron 16 of 17)	36161	NM_001003892	338599	Hs.535090	NM_001003892	ENSG00000188716	DUPD1	DUSP27|FMDSP	dual specificity phosphatase and pro isomerase domain containing 1	protein-coding
MEIS1_in_LV-MEIS1_peak_2129	chr16	30371096	30371096	+	45.8021	NA	promoter-TSS (NM_015527)	promoter-TSS (NM_015527)	162	NM_001324459	29895	Hs.50889	NM_013292	ENSG00000180209	MYLPF	HUMMLC2B|MLC2B|MRLC2|MYL11	myosin light chain, phosphorylatable, fast skeletal muscle	protein-coding
MEIS1_in_LV-MEIS1_peak_3142	chr20	362657	362657	+	45.8021	NA	Intergenic	Intergenic	14752	NM_001323685	80023	Hs.416024	NM_024958	ENSG00000125841	NRSN2	C20orf98|dJ1103G7.6	neurensin 2	protein-coding
MEIS1_in_LV-MEIS1_peak_5605	chr8	116640105	116640105	+	45.8021	NA	Intergenic	Intergenic	-11995	NR_136278	105375713		NR_136278		LOC105375713	-	uncharacterized LOC105375713	ncRNA
MEIS1_in_LV-MEIS1_peak_4022	chr4	96777341	96777341	+	45.8021	NA	Intergenic	Intergenic	-589585	NR_102713	101410545	Hs.628520	NR_102713	ENSG00000251620	STPG2-AS1	-	STPG2 antisense RNA 1	ncRNA
MEIS1_in_LV-MEIS1_peak_1447	chr12	91001515	91001515	+	45.737	NA	intron (NM_004950, intron 2 of 6)	intron (NM_004950, intron 2 of 6)	3511	NM_004950	1833	Hs.435680	NM_004950	ENSG00000083782	EPYC	DSPG3|PGLB|Pg-Lb|SLRR3B	epiphycan	protein-coding
MEIS1_in_LV-MEIS1_peak_2463	chr18	42765469	42765469	+	45.6405	NA	intron (NM_002930, intron 4 of 4)	intron (NM_002930, intron 4 of 4)	350223	NM_001272077	6014	Hs.464985	NM_002930	ENSG00000152214	RIT2	RIBA|RIN|ROC2	Ras like without CAAX 2	protein-coding
MEIS1_in_LV-MEIS1_peak_629	chr1	234544817	234544817	+	45.4171	NA	Intergenic	Intergenic	-13038	NR_038426	100506795	Hs.448989	NR_038426	ENSG00000231768	LINC01354	-	long intergenic non-protein coding RNA 1354	ncRNA
MEIS1_in_LV-MEIS1_peak_5009	chr7	25857211	25857211	+	45.4171	NA	Intergenic	CpG	92775	NR_029597	406940		NR_029597	ENSG00000199085	MIR148A	MIRN148|MIRN148A|hsa-mir-148|mir-148a	microRNA 148a	ncRNA
MEIS1_in_LV-MEIS1_peak_3571	chr3	102089345	102089345	+	45.3544	NA	Intergenic	Intergenic	-74360	NR_135549	101929411	Hs.506540	NR_135549		LOC101929411	-	uncharacterized LOC101929411	ncRNA
MEIS1_in_LV-MEIS1_peak_233	chr1	120032421	120032421	+	45.3544	NA	intron (NM_024408, intron 1 of 33)	intron (NM_024408, intron 1 of 33)	37282	NM_024408	4853	Hs.487360	NM_024408	ENSG00000134250	NOTCH2	AGS2|HJCYS|hN2	notch 2	protein-coding
MEIS1_in_LV-MEIS1_peak_4331	chr5	68202149	68202149	+	45.053	NA	Intergenic	Intergenic	12273	NR_105003	102467655	Hs.544102	NR_105003	ENSG00000253787	LINC02219	-	long intergenic non-protein coding RNA 2219	ncRNA
MEIS1_in_LV-MEIS1_peak_1784	chr13	106899608	106899608	+	45.053	NA	Intergenic	Intergenic	245728	NR_047026	100874173	Hs.569297	NR_047026	ENSG00000230156	LINC00443	-	long intergenic non-protein coding RNA 443	ncRNA
MEIS1_in_LV-MEIS1_peak_5034	chr7	36946213	36946213	+	45.0467	NA	intron (NM_001206482, intron 16 of 21)	intron (NM_001206482, intron 16 of 21)	-26781	NR_031604	100302113		NR_031604	ENSG00000221325	MIR1200	MIRN1200|hsa-mir-1200	microRNA 1200	ncRNA
MEIS1_in_LV-MEIS1_peak_930	chr11	34654995	34654995	+	44.8211	NA	intron (NM_012153, intron 6 of 8)	intron (NM_012153, intron 6 of 8)	22531	NM_001206616	26298	Hs.653859	NM_012153	ENSG00000135373	EHF	ESE3|ESE3B|ESEJ	ETS homologous factor	protein-coding
MEIS1_in_LV-MEIS1_peak_1513	chr12	105310592	105310592	+	44.8211	NA	intron (NR_131986, intron 1 of 2)	HERVK11-int|LTR|ERVK	16425	NR_131986	105369954	Hs.368938	NR_131986	ENSG00000257642	KCCAT198	-	renal clear cell carcinoma-associated transcript 198	ncRNA
MEIS1_in_LV-MEIS1_peak_737	chr10	44978870	44978870	+	44.6202	NA	promoter-TSS (NM_007021)	promoter-TSS (NM_007021)	12	NM_007021	11067	Hs.93675	NM_007021	ENSG00000165507	DEPP1	C10orf10|DEPP|FIG|Fseg	DEPP1, autophagy regulator	protein-coding
MEIS1_in_LV-MEIS1_peak_756	chr10	61179931	61179931	+	44.6202	NA	Intergenic	Intergenic	163656	NR_108052	100507058	Hs.145227	NR_108052	ENSG00000227244	LINC00845	-	long intergenic non-protein coding RNA 845	ncRNA
MEIS1_in_LV-MEIS1_peak_4215	chr4	184838505	184838505	+	44.6202	NA	Intergenic	Alu|SINE|Alu	8541	NR_037867	731424	Hs.427740	NR_037867		MIR3945HG	-	MIR3945 host gene	ncRNA
MEIS1_in_LV-MEIS1_peak_2867	chr2	67561741	67561741	+	44.6202	NA	Intergenic	Intergenic	164431	NM_019002	54465	Hs.353022	NM_019002	ENSG00000143971	ETAA1	ETAA16	ETAA1, ATR kinase activator	protein-coding
MEIS1_in_LV-MEIS1_peak_3129	chr2	237291638	237291638	+	44.6202	NA	Intergenic	Intergenic	122569	NM_057164	1293	Hs.233240	NM_004369	ENSG00000163359	COL6A3	BTHLM1|DYT27|UCMD1	collagen type VI alpha 3 chain	protein-coding
MEIS1_in_LV-MEIS1_peak_5788	chr9	96778202	96778202	+	44.6202	NA	promoter-TSS (NM_001314059)	promoter-TSS (NM_001314059)	-73	NM_001314060	22869	Hs.75264	NM_014930	ENSG00000081386	ZNF510	-	zinc finger protein 510	protein-coding
MEIS1_in_LV-MEIS1_peak_3409	chr3	24365352	24365352	+	44.5046	NA	intron (NM_001128176, intron 1 of 10)	intron (NM_001128176, intron 1 of 10)	-128735	NR_046244	644990	Hs.631912	NR_046244		THRB-AS1	-	THRB antisense RNA 1	ncRNA
MEIS1_in_LV-MEIS1_peak_4879	chr6	151027431	151027431	+	44.5046	NA	intron (NM_001242768, intron 24 of 27)	intron (NM_001242768, intron 24 of 27)	161098	NM_001242768	25902	Hs.591343	NM_015440	ENSG00000120254	MTHFD1L	FTHFSDC1|MTC1THFS|dJ292B18.2	methylenetetrahydrofolate dehydrogenase (NADP+ dependent) 1 like	protein-coding
MEIS1_in_LV-MEIS1_peak_5697	chr9	33225713	33225713	+	44.4679	NA	Intergenic	Intergenic	-14451	NM_014471	27290	Hs.555934	NM_014471	ENSG00000122711	SPINK4	HEL136|PEC-60|PEC60	serine peptidase inhibitor, Kazal type 4	protein-coding
MEIS1_in_LV-MEIS1_peak_1908	chr14	67964169	67964169	+	44.3636	NA	intron (NM_002877, intron 7 of 10)	intron (NM_002877, intron 7 of 10)	140577	NM_001321815	5890	Hs.172587	NM_002877	ENSG00000182185	RAD51B	R51H2|RAD51L1|REC2	RAD51 paralog B	protein-coding
MEIS1_in_LV-MEIS1_peak_2022	chr15	55201989	55201989	+	44.3145	NA	TTS (NM_183234)	TTS (NM_183234)	-4956	NM_016304	51187	Hs.274772	NM_016304	ENSG00000137876	RSL24D1	C15orf15|HRP-L30-iso|L30|RLP24|RPL24|RPL24L|TVAS3	ribosomal L24 domain containing 1	protein-coding
MEIS1_in_LV-MEIS1_peak_525	chr1	205699149	205699149	+	44.2739	NA	Intergenic	L1MD2|LINE|L1	-18647	NM_033102	85414	Hs.278695	NM_033102	ENSG00000158715	SLC45A3	IPCA-2|IPCA-6|IPCA-8|IPCA6|PCANAP2|PCANAP6|PCANAP8|PRST	solute carrier family 45 member 3	protein-coding
MEIS1_in_LV-MEIS1_peak_294	chr1	149885789	149885789	+	44.037	NA	3' UTR (NM_003528, exon 1 of 1)	3' UTR (NM_003528, exon 1 of 1)	893	NM_003528	8349	Hs.2178	NM_003528	ENSG00000184678	HIST2H2BE	GL105|H2B|H2B.1|H2BFQ|H2BGL105|H2BQ	histone cluster 2 H2B family member e	protein-coding
MEIS1_in_LV-MEIS1_peak_1040	chr11	85628529	85628529	+	43.8681	NA	promoter-TSS (NM_001193537)	promoter-TSS (NM_001193537)	-44	NM_018480	55863	Hs.525063	NM_018480	ENSG00000171204	TMEM126B	HT007	transmembrane protein 126B	protein-coding
MEIS1_in_LV-MEIS1_peak_2655	chr19	38544143	38544143	+	43.8681	NA	intron (NM_001042723, intron 86 of 104)	intron (NM_001042723, intron 86 of 104)	-52204	NR_134907	105372397	Hs.570011	NR_134907	ENSG00000267291	LOC105372397	-	uncharacterized LOC105372397	ncRNA
MEIS1_in_LV-MEIS1_peak_351	chr1	156616679	156616679	+	43.7849	NA	intron (NR_135113, intron 1 of 1)	intron (NR_135113, intron 1 of 1)	-2615	NM_021817	60484	Hs.410719	NM_021817	ENSG00000132702	HAPLN2	BRAL1	hyaluronan and proteoglycan link protein 2	protein-coding
MEIS1_in_LV-MEIS1_peak_4046	chr4	101953213	101953213	+	43.7468	NA	intron (NM_001127507, intron 6 of 15)	intron (NM_001127507, intron 6 of 15)	139387	NM_001083907	55024	Hs.480400	NM_017935	ENSG00000153064	BANK1	BANK	B cell scaffold protein with ankyrin repeats 1	protein-coding
MEIS1_in_LV-MEIS1_peak_4883	chr6	157187319	157187319	+	43.7299	NA	intron (NM_020732, intron 13 of 19)	intron (NM_020732, intron 13 of 19)	136940	NM_018452	729515	Hs.157212	NM_018452	ENSG00000215712	TMEM242	BM033|C6orf35	transmembrane protein 242	protein-coding
MEIS1_in_LV-MEIS1_peak_931	chr11	34668313	34668313	+	43.7195	NA	Intergenic	Intergenic	35849	NM_001206616	26298	Hs.653859	NM_012153	ENSG00000135373	EHF	ESE3|ESE3B|ESEJ	ETS homologous factor	protein-coding
MEIS1_in_LV-MEIS1_peak_3378	chr3	7214680	7214680	+	43.6509	NA	intron (NM_181874, intron 2 of 10)	intron (NM_181874, intron 2 of 10)	320604	NR_046606	100873937	Hs.570608	NR_046606	ENSG00000236202	GRM7-AS1	-	GRM7 antisense RNA 1	ncRNA
MEIS1_in_LV-MEIS1_peak_398	chr1	171344273	171344273	+	43.5413	NA	Intergenic	Intergenic	5377	NR_002719	7151	Hs.661092	NR_002719		TOP1P1	-	DNA topoisomerase I pseudogene 1	pseudo
MEIS1_in_LV-MEIS1_peak_4728	chr6	72947764	72947764	+	43.4775	NA	intron (NM_001160133, intron 1 of 14)	intron (NM_001160133, intron 1 of 14)	19989	NR_036244	100423005		NR_036244	ENSG00000266180	MIR4282	-	microRNA 4282	ncRNA
MEIS1_in_LV-MEIS1_peak_5856	chr9	128193022	128193022	+	43.4204	NA	promoter-TSS (NM_001257975)	promoter-TSS (NM_001257975)	-918	NM_001257975	25792	Hs.212395	NM_012127	ENSG00000148337	CIZ1	LSFR1|NP94|ZNF356	CDKN1A interacting zinc finger protein 1	protein-coding
MEIS1_in_LV-MEIS1_peak_1707	chr13	77171649	77171649	+	43.4204	NA	intron (NM_015057, intron 37 of 82)	intron (NM_015057, intron 37 of 82)	96135	NR_046716	100874212	Hs.569288	NR_046716	ENSG00000236051	MYCBP2-AS1	-	MYCBP2 antisense RNA 1	ncRNA
MEIS1_in_LV-MEIS1_peak_5635	chr8	143055987	143055987	+	43.4204	NA	Intergenic	Intergenic	15625	NR_031636	100302147		NR_031636	ENSG00000221768	MIR1302-7	MIRN1302-7|hsa-mir-1302-7	microRNA 1302-7	ncRNA
MEIS1_in_LV-MEIS1_peak_3844	chr3	194769268	194769268	+	43.4204	NA	intron (NR_037891, intron 3 of 3)	intron (NR_037891, intron 3 of 3)	60847	NR_037891	100507391	Hs.590099	NR_037891	ENSG00000237222	LINC01968	-	long intergenic non-protein coding RNA 1968	ncRNA
MEIS1_in_LV-MEIS1_peak_3549	chr3	96101268	96101268	+	43.2796	NA	Intergenic	L1PA17|LINE|L1	-258696	NR_107027	102465864		NR_107027	ENSG00000278103	MIR8060	hsa-mir-8060	microRNA 8060	ncRNA
MEIS1_in_LV-MEIS1_peak_2066	chr15	70099785	70099785	+	43.2594	NA	Intergenic	CpG-8376	-1868	NM_001105192	7090	Hs.287362	NM_005078	ENSG00000140332	TLE3	ESG|ESG3|GRG3|HsT18976	transducin like enhancer of split 3	protein-coding
MEIS1_in_LV-MEIS1_peak_2915	chr2	100065287	100065287	+	43.2088	NA	intron (NM_001025108, intron 2 of 23)	intron (NM_001025108, intron 2 of 23)	40296	NM_001025108	3899	Hs.444414	NM_002285	ENSG00000144218	AFF3	LAF4|MLLT2-like	AF4/FMR2 family member 3	protein-coding
MEIS1_in_LV-MEIS1_peak_1132	chr12	1171866	1171866	+	43.1692	NA	intron (NM_178039, intron 7 of 17)	intron (NM_178039, intron 7 of 17)	144118	NM_001301248	23085	Hs.601216	NM_178039	ENSG00000082805	ERC1	Cast2|ELKS|ERC-1|RAB6IP2	ELKS/RAB6-interacting/CAST family member 1	protein-coding
MEIS1_in_LV-MEIS1_peak_2222	chr16	87388644	87388644	+	42.9737	NA	intron (NM_001282683, intron 2 of 9)	intron (NM_001282683, intron 2 of 9)	3463	NM_001282683	79791	Hs.567582	NM_024735	ENSG00000103264	FBXO31	FBX14|FBXO14|Fbx31|MRT45|pp2386	F-box protein 31	protein-coding
MEIS1_in_LV-MEIS1_peak_605	chr1	228139973	228139973	+	42.7119	NA	promoter-TSS (NM_001159390)	promoter-TSS (NM_001159390)	-111	NM_001242839	2987	Hs.376933	NM_000858	ENSG00000143774	GUK1	GMK	guanylate kinase 1	protein-coding
MEIS1_in_LV-MEIS1_peak_3351	chr22	42955427	42955427	+	42.6788	NA	intron (NM_001184970, intron 1 of 10)	intron (NM_001184970, intron 1 of 10)	4454	NM_001184971	11252	Hs.162877	NM_007229	ENSG00000100266	PACSIN2	SDPII	protein kinase C and casein kinase substrate in neurons 2	protein-coding
MEIS1_in_LV-MEIS1_peak_4312	chr5	59049234	59049234	+	42.4783	NA	intron (NM_001165899, intron 7 of 16)	L2a|LINE|L2	-9722	NM_001197222	5144	Hs.117545	NM_006203	ENSG00000113448	PDE4D	ACRDYS2|DPDE3|HSPDE4D|PDE43|PDE4DN2|STRK1	phosphodiesterase 4D	protein-coding
MEIS1_in_LV-MEIS1_peak_1380	chr12	67714869	67714869	+	42.3671	NA	intron (NR_110063, intron 4 of 4)	intron (NR_110063, intron 4 of 4)	14606	NR_110063	101927901	Hs.369609	NR_110063	ENSG00000255970	LINC02421	-	long intergenic non-protein coding RNA 2421	ncRNA
MEIS1_in_LV-MEIS1_peak_725	chr10	37146645	37146645	+	42.3419	NA	intron (NM_052997, intron 8 of 35)	LTR22B|LTR|ERVK	20788	NM_052997	91074	Hs.373787	NM_052997	ENSG00000148513	ANKRD30A	NY-BR-1	ankyrin repeat domain 30A	protein-coding
MEIS1_in_LV-MEIS1_peak_2460	chr18	42644875	42644875	+	42.3419	NA	intron (NR_046174, intron 7 of 9)	MER89|LTR|ERV1	458207	NR_046454	284260	Hs.652819	NR_046174	ENSG00000267586	LINC00907	-	long intergenic non-protein coding RNA 907	ncRNA
MEIS1_in_LV-MEIS1_peak_329	chr1	154351603	154351603	+	42.3222	NA	TTS (NM_020452)	TTS (NM_020452)	23803	NM_020452	57198	Hs.435700	NM_020452	ENSG00000143515	ATP8B2	ATPID	ATPase phospholipid transporting 8B2	protein-coding
MEIS1_in_LV-MEIS1_peak_1677	chr13	62537385	62537385	+	42.2567	NA	Intergenic	Intergenic	259307	NR_120404	100874176	Hs.402083	NR_047029		LINC00448	-	long intergenic non-protein coding RNA 448	ncRNA
MEIS1_in_LV-MEIS1_peak_5513	chr8	74488661	74488661	+	42.2205	NA	Intergenic	Intergenic	-59882	NR_049860	100847058		NR_049860	ENSG00000266502	MIR5681A	-	microRNA 5681a	ncRNA
MEIS1_in_LV-MEIS1_peak_2487	chr18	63681673	63681673	+	42.2205	NA	Intergenic	Intergenic	-19710	NM_006919	6317	Hs.227948	NM_006919	ENSG00000057149	SERPINB3	HsT1196|SCC|SCCA-1|SCCA-PD|SCCA1|SSCA1|T4-A	serpin family B member 3	protein-coding
MEIS1_in_LV-MEIS1_peak_4530	chr5	148141941	148141941	+	42.2205	NA	Intergenic	Intergenic	-26605	NM_001001325	408187	Hs.553815	NM_001001325	ENSG00000196800	SPINK14	SPINK5L2	serine peptidase inhibitor, Kazal type 14 (putative)	protein-coding
MEIS1_in_LV-MEIS1_peak_1800	chr14	22334204	22334204	+	42.2205	NA	Intergenic	LTR106_Mam|LTR|LTR	255033	NM_001344	1603	Hs.82890	NM_001344	ENSG00000129562	DAD1	OST2	defender against cell death 1	protein-coding
MEIS1_in_LV-MEIS1_peak_4246	chr5	17401883	17401883	+	42.2205	NA	Intergenic	Intergenic	-2136	NR_134275	101929544	Hs.23725	NR_134273	ENSG00000248455	LINC02217	-	long intergenic non-protein coding RNA 2217	ncRNA
MEIS1_in_LV-MEIS1_peak_5064	chr7	46900961	46900961	+	42.1456	NA	Intergenic	Intergenic	-203839	NR_134575	730338	Hs.640207	NR_134575	ENSG00000233539	LOC730338	-	uncharacterized LOC730338	ncRNA
MEIS1_in_LV-MEIS1_peak_1944	chr14	84442774	84442774	+	42.0961	NA	Intergenic	Intergenic	-944501	NR_135155	105370605		NR_135155	ENSG00000258814	LINC02329	-	long intergenic non-protein coding RNA 2329	ncRNA
MEIS1_in_LV-MEIS1_peak_1617	chr13	34335740	34335740	+	42.0961	NA	Intergenic	Intergenic	304945	NR_047036	100874179	Hs.569253	NR_047036	ENSG00000225179	LINC00457	-	long intergenic non-protein coding RNA 457	ncRNA
MEIS1_in_LV-MEIS1_peak_3125	chr2	233566779	233566779	+	42.0961	NA	Intergenic	CpG	-1189	NM_018218	55230	Hs.96513	NM_018218	ENSG00000085982	USP40	-	ubiquitin specific peptidase 40	protein-coding
MEIS1_in_LV-MEIS1_peak_1010	chr11	68082655	68082655	+	42.0961	NA	intron (NM_001277, intron 2 of 11)	intron (NM_001277, intron 2 of 11)	37861	NR_106811	102465451		NR_106811	ENSG00000275022	MIR6753	hsa-mir-6753	microRNA 6753	ncRNA
MEIS1_in_LV-MEIS1_peak_1615	chr13	34125098	34125098	+	41.7802	NA	Intergenic	L2a|LINE|L2	307029	NM_181558	5983	Hs.115474	NM_002915	ENSG00000133119	RFC3	RFC38	replication factor C subunit 3	protein-coding
MEIS1_in_LV-MEIS1_peak_288	chr1	149428506	149428506	+	41.6593	NA	Intergenic	Intergenic	-155317	NM_001135789	653598	Hs.534674	NM_001135789	ENSG00000263464	PPIAL4C	COAS-2	peptidylprolyl isomerase A like 4C	protein-coding
MEIS1_in_LV-MEIS1_peak_2112	chr16	21515659	21515659	+	41.5138	NA	Intergenic	LTR22B|LTR|ERVK	4785	NR_002594	387254	Hs.448808	NR_002594		SLC7A5P2	IMAA|MMAA	solute carrier family 7 member 5 pseudogene 2	pseudo
MEIS1_in_LV-MEIS1_peak_2762	chr2	7031882	7031882	+	41.4877	NA	intron (NM_014746, intron 8 of 8)	intron (NM_014746, intron 8 of 8)	45998	NR_110252	101929452		NR_110252	ENSG00000223884	LOC101929452	-	uncharacterized LOC101929452	ncRNA
MEIS1_in_LV-MEIS1_peak_2392	chr17	81395307	81395307	+	41.2671	NA	Intergenic	CpG	-4414	NM_001291324	57597	Hs.514580	NM_024696	ENSG00000266074	BAHCC1	BAHD2	BAH domain and coiled-coil containing 1	protein-coding
MEIS1_in_LV-MEIS1_peak_3645	chr3	129908618	129908618	+	41.2248	NA	non-coding (NR_037893, exon 3 of 3)	non-coding (NR_037893, exon 3 of 3)	14747	NR_037893	100507032	Hs.529562	NR_037893	ENSG00000271270	TMCC1-AS1	-	TMCC1 antisense RNA 1 (head to head)	ncRNA
MEIS1_in_LV-MEIS1_peak_3401	chr3	20041656	20041656	+	41.21	NA	intron (NM_003884, intron 1 of 17)	intron (NM_003884, intron 1 of 17)	1624	NM_003884	8850	Hs.533055	NM_003884	ENSG00000114166	KAT2B	CAF|P/CAF|PCAF	lysine acetyltransferase 2B	protein-coding
MEIS1_in_LV-MEIS1_peak_2442	chr18	31207036	31207036	+	41.1713	NA	Intergenic	Intergenic	-44180	NM_004948	1823	Hs.567260	NM_004948	ENSG00000134765	DSC1	CDHF1|DG2/DG3	desmocollin 1	protein-coding
MEIS1_in_LV-MEIS1_peak_641	chr1	236342820	236342820	+	41.1362	NA	Intergenic	Intergenic	-51560	NM_145861	128178	Hs.352224	NM_080738	ENSG00000186197	EDARADD	ECTD11A|ECTD11B|ED3|EDA3	EDAR associated death domain	protein-coding
MEIS1_in_LV-MEIS1_peak_3905	chr4	40191643	40191643	+	41.1362	NA	intron (NM_001278368, intron 1 of 2)	intron (NM_001278368, intron 1 of 2)	632	NM_001278368	399	Hs.654594	NM_004310	ENSG00000168421	RHOH	ARHH|TTF	ras homolog family member H	protein-coding
MEIS1_in_LV-MEIS1_peak_5250	chr7	102592638	102592638	+	41.1362	NA	intron (NM_001079877, intron 15 of 19)	intron (NM_001079877, intron 15 of 19)	-20017	NM_001097615	548644	Hs.610255	NM_001015884	ENSG00000168255	POLR2J3	POLR2J2|RPB11b1|RPB11b2	RNA polymerase II subunit J3	protein-coding
MEIS1_in_LV-MEIS1_peak_3247	chr21	20353531	20353531	+	41.0725	NA	Intergenic	Intergenic	449577	NR_109786	387486	Hs.576551	NR_024090	ENSG00000224924	LINC00320	C21orf131|NCRNA00320|PRED14	long intergenic non-protein coding RNA 320	ncRNA
MEIS1_in_LV-MEIS1_peak_1711	chr13	79481129	79481129	+	41.0233	NA	promoter-TSS (NM_001161407)	promoter-TSS (NM_001161407)	5	NM_019080	54602	Hs.525093	NM_019080	ENSG00000102471	NDFIP2	N4WBP5A	Nedd4 family interacting protein 2	protein-coding
MEIS1_in_LV-MEIS1_peak_4337	chr5	71715120	71715120	+	41.0233	NA	Intergenic	Intergenic	-4043	NM_004291	9607	Hs.1707	NM_004291	ENSG00000164326	CARTPT	CART	CART prepropeptide	protein-coding
MEIS1_in_LV-MEIS1_peak_15	chr1	8412646	8412646	+	41.0233	NA	intron (NM_012102, intron 13 of 23)	intron (NM_012102, intron 13 of 23)	11041	NM_001042682	473	Hs.463041	NM_012102	ENSG00000142599	RERE	ARG|ARP|ATN1L|DNB1|NEDBEH	arginine-glutamic acid dipeptide repeats	protein-coding
MEIS1_in_LV-MEIS1_peak_4348	chr5	76412716	76412716	+	41.0233	NA	intron (NM_006633, intron 1 of 35)	intron (NM_006633, intron 1 of 35)	9461	NM_006633	10788	Hs.291030	NM_006633	ENSG00000145703	IQGAP2	-	IQ motif containing GTPase activating protein 2	protein-coding
MEIS1_in_LV-MEIS1_peak_5644	chr8_KI270817v1_alt	46287	46287	+	41.0233	NA	Intergenic	Intergenic	15637	NR_031636	100302147		NR_031636	ENSG00000221768	MIR1302-7	MIRN1302-7|hsa-mir-1302-7	microRNA 1302-7	ncRNA
MEIS1_in_LV-MEIS1_peak_2657	chr19	38619029	38619029	+	41.0233	NA	promoter-TSS (NM_007181)	promoter-TSS (NM_007181)	-43	NM_001308393	27335	Hs.314359	NM_013234	ENSG00000178982	EIF3K	ARG134|EIF3-p28|EIF3S12|HSPC029|M9|MSTP001|PLAC-24|PLAC24|PRO1474|PTD001	eukaryotic translation initiation factor 3 subunit K	protein-coding
MEIS1_in_LV-MEIS1_peak_4776	chr6	102742272	102742272	+	41.0208	NA	Intergenic	Intergenic	1343287	NM_001166247	2898	Hs.98262	NM_021956	ENSG00000164418	GRIK2	EAA4|GLR6|GLUK6|GLUR6|GluK2|MRT6	glutamate ionotropic receptor kainate type subunit 2	protein-coding
MEIS1_in_LV-MEIS1_peak_1889	chr14	56660917	56660917	+	41.0208	NA	Intergenic	Intergenic	81124	NM_017799	54916	Hs.497253	NM_017799	ENSG00000070269	TMEM260	C14orf101|SHDRA	transmembrane protein 260	protein-coding
MEIS1_in_LV-MEIS1_peak_1052	chr11	89557567	89557567	+	40.9862	NA	intron (NM_001143837, intron 1 of 20)	intron (NM_001143837, intron 1 of 20)	32044	NM_001143837	50507	Hs.371036	NM_016931	ENSG00000086991	NOX4	KOX|KOX-1|RENOX	NADPH oxidase 4	protein-coding
MEIS1_in_LV-MEIS1_peak_4182	chr4	161201131	161201131	+	40.9862	NA	Intergenic	Intergenic	-821602	NR_125888	101928052	Hs.647993	NR_125888	ENSG00000249419	LOC101928052	-	uncharacterized LOC101928052	ncRNA
MEIS1_in_LV-MEIS1_peak_4826	chr6	131258505	131258505	+	40.9862	NA	intron (NM_138633, intron 2 of 2)	LTR106_Mam|LTR|LTR	8346	NM_138633	9465	Hs.486483	NM_004842	ENSG00000118507	AKAP7	AKAP15|AKAP18	A-kinase anchoring protein 7	protein-coding
MEIS1_in_LV-MEIS1_peak_664	chr1	247104471	247104471	+	40.8457	NA	promoter-TSS (NM_001142572)	promoter-TSS (NM_001142572)	-99	NM_001142572	79862	Hs.163754	NM_024804	ENSG00000188295	ZNF669	-	zinc finger protein 669	protein-coding
MEIS1_in_LV-MEIS1_peak_628	chr1	234523709	234523709	+	40.7595	NA	Intergenic	Intergenic	8070	NR_038426	100506795	Hs.448989	NR_038426	ENSG00000231768	LINC01354	-	long intergenic non-protein coding RNA 1354	ncRNA
MEIS1_in_LV-MEIS1_peak_2717	chr19	50842239	50842239	+	40.7177	NA	intron (NR_131203, intron 2 of 2)	intron (NR_131203, intron 2 of 2)	-10716	NR_102274	55554	Hs.567535	NM_017509	ENSG00000174562	KLK15	ACO|HSRNASPH	kallikrein related peptidase 15	protein-coding
MEIS1_in_LV-MEIS1_peak_5312	chr7	117588443	117588443	+	40.6845	NA	intron (NM_000492, intron 12 of 26)	intron (NM_000492, intron 12 of 26)	108480	NM_000492	1080	Hs.489786	NM_000492	ENSG00000001626	CFTR	ABC35|ABCC7|CF|CFTR/MRP|MRP7|TNR-CFTR|dJ760C5.1	cystic fibrosis transmembrane conductance regulator	protein-coding
MEIS1_in_LV-MEIS1_peak_337	chr1	155085451	155085451	+	40.5838	NA	intron (NM_004952, intron 2 of 4)	CpG-1788	6579	NM_004952	1944	Hs.516656	NM_004952	ENSG00000143590	EFNA3	EFL2|EPLG3|Ehk1-L|LERK3	ephrin A3	protein-coding
MEIS1_in_LV-MEIS1_peak_662	chr1	247008177	247008177	+	40.3523	NA	promoter-TSS (NM_001204221)	promoter-TSS (NM_001204221)	-84	NR_037892	57116	Hs.669893	NM_020394	ENSG00000197472	ZNF695	SBZF3	zinc finger protein 695	protein-coding
MEIS1_in_LV-MEIS1_peak_3773	chr3	174936765	174936765	+	40.3511	NA	intron (NM_207015, intron 1 of 13)	MER58A|DNA|hAT-Charlie	77444	NM_207015	254827	Hs.565848	NM_207015	ENSG00000177694	NAALADL2	-	N-acetylated alpha-linked acidic dipeptidase like 2	protein-coding
MEIS1_in_LV-MEIS1_peak_5190	chr7	92057496	92057496	+	40.1619	NA	intron (NM_005751, intron 22 of 49)	intron (NM_005751, intron 22 of 49)	77030	NM_000786	1595	Hs.417077	NM_000786	ENSG00000001630	CYP51A1	CP51|CYP51|CYPL1|LDM|P450-14DM|P450L1	cytochrome P450 family 51 subfamily A member 1	protein-coding
MEIS1_in_LV-MEIS1_peak_5118	chr7	72744334	72744334	+	40.1467	NA	intron (NM_001145440, intron 8 of 13)	L1MA10|LINE|L1	46431	NR_039794	100616331		NR_039794	ENSG00000264494	MIR4650-2	-	microRNA 4650-2	ncRNA
MEIS1_in_LV-MEIS1_peak_750	chr10	56139518	56139518	+	40.1467	NA	Intergenic	Intergenic	221755	NM_007057	11130	Hs.591363	NM_007057	ENSG00000122952	ZWINT	HZwint-1|KNTC2AP|SIP30|ZWINT1	ZW10 interacting kinetochore protein	protein-coding
MEIS1_in_LV-MEIS1_peak_3649	chr3	133453166	133453166	+	40.0946	NA	intron (NM_003571, intron 4 of 6)	intron (NM_003571, intron 4 of 6)	2610	NR_135278	85003	Hs.659202	NR_135276	ENSG00000249993	BFSP2-AS1	-	BFSP2 antisense RNA 1	ncRNA
MEIS1_in_LV-MEIS1_peak_5356	chr7	133316773	133316773	+	40.0946	NA	intron (NM_001037126, intron 4 of 9)	intron (NM_001037126, intron 4 of 9)	25892	NR_106749	102465139		NR_106749	ENSG00000276137	MIR6133	hsa-mir-6133	microRNA 6133	ncRNA
MEIS1_in_LV-MEIS1_peak_3551	chr3	96347351	96347351	+	40.0495	NA	Intergenic	L1ME1|LINE|L1	-12613	NR_107027	102465864		NR_107027	ENSG00000278103	MIR8060	hsa-mir-8060	microRNA 8060	ncRNA
MEIS1_in_LV-MEIS1_peak_1537	chr12	114656286	114656286	+	40.0241	NA	Intergenic	Intergenic	27878	NM_016569	6926	Hs.744016	NM_005996	ENSG00000135111	TBX3	TBX3-ISO|UMS|XHL	T-box 3	protein-coding
MEIS1_in_LV-MEIS1_peak_3816	chr3	187742921	187742921	+	39.9406	NA	intron (NM_001706, intron 1 of 9)	intron (NM_001706, intron 1 of 9)	2804	NM_001706	604	Hs.478588	NM_001706	ENSG00000113916	BCL6	BCL5|BCL6A|LAZ3|ZBTB27|ZNF51	B cell CLL/lymphoma 6	protein-coding
MEIS1_in_LV-MEIS1_peak_5504	chr8	68854632	68854632	+	39.8749	NA	Intergenic	Intergenic	249558	NR_039986	100505718	Hs.122386	NR_039986	ENSG00000253658	LINC01592	-	long intergenic non-protein coding RNA 1592	ncRNA
MEIS1_in_LV-MEIS1_peak_4444	chr5	120007744	120007744	+	39.8749	NA	Intergenic	Intergenic	378185	NM_001163991	340069	Hs.713304	NM_182761	ENSG00000164334	FAM170A	ZNFD	family with sequence similarity 170 member A	protein-coding
MEIS1_in_LV-MEIS1_peak_1256	chr12	46793101	46793101	+	39.8749	NA	5' UTR (NM_018018, exon 3 of 17)	5' UTR (NM_018018, exon 3 of 17)	32896	NM_018018	55089	Hs.446077	NM_018018	ENSG00000139209	SLC38A4	ATA3|NAT3|PAAT|SNAT4	solute carrier family 38 member 4	protein-coding
MEIS1_in_LV-MEIS1_peak_2912	chr2	99999245	99999245	+	39.8717	NA	intron (NM_001025108, intron 6 of 23)	intron (NM_001025108, intron 6 of 23)	106338	NM_001025108	3899	Hs.444414	NM_002285	ENSG00000144218	AFF3	LAF4|MLLT2-like	AF4/FMR2 family member 3	protein-coding
MEIS1_in_LV-MEIS1_peak_4691	chr6	51474730	51474730	+	39.8717	NA	Intergenic	Intergenic	-147140	NR_125840	101927082	Hs.730296	NR_125840		LOC101927082	-	uncharacterized LOC101927082	ncRNA
MEIS1_in_LV-MEIS1_peak_3427	chr3	32095666	32095666	+	39.8427	NA	Intergenic	L1MC4|LINE|L1	-10845	NM_015141	23171	Hs.82432	NM_015141	ENSG00000152642	GPD1L	GPD1-L	glycerol-3-phosphate dehydrogenase 1 like	protein-coding
MEIS1_in_LV-MEIS1_peak_4520	chr5	143898460	143898460	+	39.8427	NA	Intergenic	Intergenic	86299	NM_021182	57824	Hs.158320	NM_021182	ENSG00000158497	HMHB1	HB-1|HB-1Y|HLA-HB1	histocompatibility minor HB-1	protein-coding
MEIS1_in_LV-MEIS1_peak_3376	chr3	7106861	7106861	+	39.8427	NA	intron (NM_181874, intron 1 of 10)	intron (NM_181874, intron 1 of 10)	-212844	NR_131906	105376946	Hs.616038	NR_131906	ENSG00000237665	GRM7-AS2	-	GRM7 antisense RNA 2	ncRNA
MEIS1_in_LV-MEIS1_peak_2653	chr19	38374584	38374584	+	39.8427	NA	promoter-TSS (NM_002812)	promoter-TSS (NM_002812)	34	NM_002812	5714	Hs.78466	NM_002812	ENSG00000099341	PSMD8	HEL-S-91n|HIP6|HYPF|Nin1p|Rpn12|S14|p31	proteasome 26S subunit, non-ATPase 8	protein-coding
MEIS1_in_LV-MEIS1_peak_2888	chr2	79171901	79171901	+	39.8427	NA	Intergenic	L1MA4|LINE|L1	-12147	NM_138937	5068	Hs.567312	NM_002580	ENSG00000172016	REG3A	HIP|HIP/PAP|INGAP|PAP|PAP-H|PAP1|PBCGF|REG-III|REG3	regenerating family member 3 alpha	protein-coding
MEIS1_in_LV-MEIS1_peak_5838	chr9	123149232	123149232	+	39.8427	NA	intron (NM_001171137, intron 11 of 18)	MER134|DNA?|DNA?	-33755	NR_026677	81571	Hs.708072	NM_030814	ENSG00000236901	MIR600HG	C9orf45|GL012|NCRNA00287	MIR600 host gene	ncRNA
MEIS1_in_LV-MEIS1_peak_5741	chr9	70475345	70475345	+	39.8427	NA	Intergenic	Intergenic	-60688	NM_001206	687	Hs.150557	NM_001206	ENSG00000119138	KLF9	BTEB|BTEB1	Kruppel like factor 9	protein-coding
MEIS1_in_LV-MEIS1_peak_1203	chr12	21842751	21842751	+	39.7318	NA	intron (NM_005691, intron 26 of 37)	L1ME3G|LINE|L1	-67930	NM_004982	3764	Hs.102308	NM_004982	ENSG00000121361	KCNJ8	KIR6.1|uKATP-1	potassium voltage-gated channel subfamily J member 8	protein-coding
MEIS1_in_LV-MEIS1_peak_449	chr1	184622372	184622372	+	39.7318	NA	3' UTR (NM_030806, exon 6 of 6)	3' UTR (NM_030806, exon 6 of 6)	132535	NM_001319960	80267	Hs.523811	NM_025191	ENSG00000116406	EDEM3	C1orf22	ER degradation enhancing alpha-mannosidase like protein 3	protein-coding
MEIS1_in_LV-MEIS1_peak_5038	chr7	40240159	40240159	+	38.8976	NA	intron (NM_001193312, intron 7 of 12)	intron (NM_001193312, intron 7 of 12)	105183	NM_001193312	79783	Hs.586313	NM_024728	ENSG00000175600	SUGCT	C7orf10|DERP13|GA3|ORF19	succinyl-CoA:glutarate-CoA transferase	protein-coding
MEIS1_in_LV-MEIS1_peak_650	chr1	239879519	239879519	+	38.8898	NA	intron (NM_001347716, intron 7 of 7)	intron (NM_001347716, intron 7 of 7)	20353	NR_046582	100873984	Hs.199475	NR_046582	ENSG00000234601	CHRM3-AS1	-	CHRM3 antisense RNA 1	ncRNA
MEIS1_in_LV-MEIS1_peak_1649	chr13	50320479	50320479	+	38.8844	NA	intron (NR_109974, intron 2 of 6)	intron (NR_109974, intron 2 of 6)	148461	NR_002183	145165	Hs.511834	NM_153290		ST13P4	FAM10A4|FAM10A4P	ST13, Hsp70 interacting protein pseudogene 4	pseudo
MEIS1_in_LV-MEIS1_peak_2502	chr18	72305461	72305461	+	38.8659	NA	Intergenic	Intergenic	239027	NM_182511	147381	Hs.569851	NM_182511	ENSG00000141668	CBLN2	-	cerebellin 2 precursor	protein-coding
MEIS1_in_LV-MEIS1_peak_3642	chr3	128382524	128382524	+	38.8659	NA	intron (NM_021937, intron 6 of 6)	intron (NM_021937, intron 6 of 6)	-81070	NR_037890	285224	Hs.683815	NR_037890	ENSG00000242049	DNAJB8-AS1	-	DNAJB8 antisense RNA 1	ncRNA
MEIS1_in_LV-MEIS1_peak_749	chr10	55249002	55249002	+	38.8176	NA	Intergenic	L1MC|LINE|L1	-349988	NM_001190478	100463289	Hs.727204	NM_001190478	ENSG00000249860	MTRNR2L5	HN5	MT-RNR2 like 5	protein-coding
MEIS1_in_LV-MEIS1_peak_3382	chr3	9898063	9898063	+	38.778	NA	Intergenic	Intergenic	-4549	NM_153483	132014	Hs.390823	NM_144640	ENSG00000163701	IL17RE	-	interleukin 17 receptor E	protein-coding
MEIS1_in_LV-MEIS1_peak_1723	chr13	85521808	85521808	+	38.778	NA	intron (NR_046989, intron 1 of 3)	intron (NR_046989, intron 1 of 3)	158205	NR_046989	100874137	Hs.742643	NR_046989	ENSG00000226317	LINC00351	-	long intergenic non-protein coding RNA 351	ncRNA
MEIS1_in_LV-MEIS1_peak_161	chr1	78501377	78501377	+	38.778	NA	intron (NM_001039585, intron 3 of 3)	intron (NM_001039585, intron 3 of 3)	10334	NM_001039585	5737	Hs.654365	NM_000959	ENSG00000122420	PTGFR	FP	prostaglandin F receptor	protein-coding
MEIS1_in_LV-MEIS1_peak_1147	chr12	6371293	6371293	+	38.778	NA	intron (NM_001038, intron 2 of 12)	intron (NM_001038, intron 2 of 12)	3931	NM_001159576	6337	Hs.591047	NM_001038	ENSG00000111319	SCNN1A	BESC2|ENaCa|ENaCalpha|SCNEA|SCNN1	sodium channel epithelial 1 alpha subunit	protein-coding
MEIS1_in_LV-MEIS1_peak_3179	chr20	39622266	39622266	+	38.6613	NA	Intergenic	L1ME1|LINE|L1	-382195	NR_109936	100505663	Hs.559348	NR_109936	ENSG00000237767	LINC01370	HI-LNC25|HILNC25	long intergenic non-protein coding RNA 1370	ncRNA
MEIS1_in_LV-MEIS1_peak_3034	chr2	194968794	194968794	+	38.6613	NA	Intergenic	Intergenic	238199	NR_110223	101927431	Hs.558215	NR_110223	ENSG00000230173	LINC01790	-	long intergenic non-protein coding RNA 1790	ncRNA
MEIS1_in_LV-MEIS1_peak_1650	chr13	50357938	50357938	+	38.6613	NA	intron (NR_109974, intron 2 of 6)	intron (NR_109974, intron 2 of 6)	169511	NR_125753	103689915	Hs.722230	NR_125753	ENSG00000229323	DLEU1-AS1	LINC01308	DLEU1 antisense RNA 1	ncRNA
MEIS1_in_LV-MEIS1_peak_4142	chr4	140426809	140426809	+	38.6613	NA	intron (NM_001130675, intron 1 of 15)	intron (NM_001130675, intron 1 of 15)	852	NM_004362	1047	Hs.86368	NM_004362	ENSG00000153132	CLGN	-	calmegin	protein-coding
MEIS1_in_LV-MEIS1_peak_4544	chr5	154834221	154834221	+	38.6613	NA	intron (NM_032385, intron 4 of 8)	intron (NM_032385, intron 4 of 8)	4763	NR_039667	100616306		NR_039667	ENSG00000263361	MIR378H	-	microRNA 378h	ncRNA
MEIS1_in_LV-MEIS1_peak_1111	chr11	114179474	114179474	+	38.6613	NA	intron (NM_001018011, intron 3 of 6)	intron (NM_001018011, intron 3 of 6)	-116339	NM_006169	4837	Hs.503911	NM_006169	ENSG00000166741	NNMT	-	nicotinamide N-methyltransferase	protein-coding
MEIS1_in_LV-MEIS1_peak_4343	chr5	72010566	72010566	+	38.6602	NA	Intergenic	Intergenic	-96702	NM_005909	4131	Hs.335079	NM_005909	ENSG00000131711	MAP1B	FUTSCH|MAP5|PPP1R102	microtubule associated protein 1B	protein-coding
MEIS1_in_LV-MEIS1_peak_5216	chr7	97973494	97973494	+	38.6367	NA	Intergenic	MER51E|LTR|ERV1	-1168	NR_002822	389538	Hs.655977	NR_002822		CCZ1P-OR7E38P	-	CCZ1P-OR7E38P readthrough	pseudo
MEIS1_in_LV-MEIS1_peak_1562	chr12	120321576	120321576	+	38.6327	NA	TTS (NM_000928)	TTS (NM_000928)	6213	NM_000928	5319	Hs.992	NM_000928	ENSG00000170890	PLA2G1B	PLA2|PLA2A|PPLA2	phospholipase A2 group IB	protein-coding
MEIS1_in_LV-MEIS1_peak_3577	chr3	102229306	102229306	+	38.5874	NA	Intergenic	Intergenic	65601	NR_135549	101929411	Hs.506540	NR_135549		LOC101929411	-	uncharacterized LOC101929411	ncRNA
MEIS1_in_LV-MEIS1_peak_4405	chr5	105616696	105616696	+	38.3782	NA	Intergenic	Intergenic	517222	NR_000039	9366	Hs.158296	NR_000039	ENSG00000232159	RAB9BP1	RAB9P1	RAB9B, member RAS oncogene family pseudogene 1	pseudo
MEIS1_in_LV-MEIS1_peak_3941	chr4	69408574	69408574	+	38.2986	NA	Intergenic	Intergenic	87334	NM_001297615	7363	Hs.285887	NM_021139	ENSG00000156096	UGT2B4	HLUG25|UDPGT2B4|UDPGTH1|UDPGTh-1|UGT2B11	UDP glucuronosyltransferase family 2 member B4	protein-coding
MEIS1_in_LV-MEIS1_peak_5099	chr7	65373713	65373713	+	38.2282	NA	promoter-TSS (NM_001287532)	promoter-TSS (NM_001287532)	-86	NM_152626	168374	Hs.9521	NM_007139	ENSG00000146757	ZNF92	HEL-203|HPF12|HTF12|TF12	zinc finger protein 92	protein-coding
MEIS1_in_LV-MEIS1_peak_265	chr1	146052225	146052225	+	38.1266	NA	promoter-TSS (NR_104085)	promoter-TSS (NR_104085)	19	NR_104085	101954276		NR_104085	ENSG00000201558	RNVU1-6	RNU1-99|vU1.6	RNA, variant U1 small nuclear 6	snRNA
MEIS1_in_LV-MEIS1_peak_420	chr1	179288224	179288224	+	38.0324	NA	Intergenic	L2|LINE|L2	-5490	NM_001252512	6646	Hs.445588	NM_003101	ENSG00000057252	SOAT1	ACACT|ACAT|ACAT-1|ACAT1|SOAT|STAT	sterol O-acyltransferase 1	protein-coding
MEIS1_in_LV-MEIS1_peak_2056	chr15	69467936	69467936	+	37.9673	NA	Intergenic	Intergenic	15116	NM_213725	6176	Hs.356502	NM_001003	ENSG00000137818	RPLP1	LP1|P1|RPP1	ribosomal protein lateral stalk subunit P1	protein-coding
MEIS1_in_LV-MEIS1_peak_2707	chr19	49451931	49451931	+	37.9673	NA	promoter-TSS (NM_017916)	promoter-TSS (NM_017916)	-73	NM_017916	55011	Hs.5245	NM_017916	ENSG00000104872	PIH1D1	NOP17	PIH1 domain containing 1	protein-coding
MEIS1_in_LV-MEIS1_peak_4015	chr4	95025937	95025937	+	37.9673	NA	intron (NM_001256792, intron 1 of 10)	intron (NM_001256792, intron 1 of 10)	-25742	NM_001256793	658	Hs.598475	NM_001203	ENSG00000138696	BMPR1B	ALK-6|ALK6|AMDD|BDA1D|BDA2|CDw293	bone morphogenetic protein receptor type 1B	protein-coding
MEIS1_in_LV-MEIS1_peak_5164	chr7	84161639	84161639	+	37.9358	NA	intron (NM_006080, intron 1 of 16)	intron (NM_006080, intron 1 of 16)	33262	NM_006080	10371	Hs.252451	NM_006080	ENSG00000075213	SEMA3A	COLL1|HH16|Hsema-I|Hsema-III|SEMA1|SEMAD|SEMAIII|SEMAL|SemD|coll-1	semaphorin 3A	protein-coding
MEIS1_in_LV-MEIS1_peak_4041	chr4	101256400	101256400	+	37.7629	NA	intron (NM_001130692, intron 1 of 11)	intron (NM_001130692, intron 1 of 11)	-15528	NR_107033	102465868		NR_107033	ENSG00000273882	MIR8066	hsa-mir-8066	microRNA 8066	ncRNA
MEIS1_in_LV-MEIS1_peak_4922	chr7	3570839	3570839	+	37.7252	NA	intron (NM_152744, intron 1 of 44)	intron (NM_152744, intron 1 of 44)	269391	NM_152744	221935	Hs.653013	NM_152744	ENSG00000146555	SDK1	-	sidekick cell adhesion molecule 1	protein-coding
MEIS1_in_LV-MEIS1_peak_1807	chr14	24114737	24114737	+	37.6976	NA	promoter-TSS (NR_028100)	promoter-TSS (NR_028100)	40	NM_001163484	80344	Hs.525251	NM_025230	ENSG00000100897	DCAF11	GL014|PRO2389|WDR23	DDB1 and CUL4 associated factor 11	protein-coding
MEIS1_in_LV-MEIS1_peak_5553	chr8	84691224	84691224	+	37.5814	NA	intron (NM_001100391, intron 2 of 8)	intron (NM_001100391, intron 2 of 8)	-14703	NM_001287244	138046	Hs.121663	NM_173848	ENSG00000184672	RALYL	HNRPCL3	RALY RNA binding protein like	protein-coding
MEIS1_in_LV-MEIS1_peak_238	chr1	120761195	120761195	+	37.5558	NA	Intergenic	Intergenic	89790	NR_104086	101954277		NR_104086	ENSG00000275538	RNVU1-19	RNU1-126|RNU1-147|RNVU1-13|vU1.13|vU1.19	RNA, variant U1 small nuclear 19	snRNA
MEIS1_in_LV-MEIS1_peak_2584	chr19	12333766	12333766	+	37.4863	NA	promoter-TSS (NM_145276)	promoter-TSS (NM_145276)	-46	NM_145276	147837	Hs.663510	NM_145276	ENSG00000188868	ZNF563	-	zinc finger protein 563	protein-coding
MEIS1_in_LV-MEIS1_peak_3388	chr3	12964944	12964944	+	37.4863	NA	intron (NM_001134382, intron 1 of 13)	intron (NM_001134382, intron 1 of 13)	2754	NM_014869	9922	Hs.475506	NM_014869	ENSG00000144711	IQSEC1	ARF-GEP100|ARFGEP100|BRAG2|GEP100	IQ motif and Sec7 domain 1	protein-coding
MEIS1_in_LV-MEIS1_peak_2124	chr16	29765654	29765654	+	37.4863	NA	Intergenic	Intergenic	-12586	NM_152338	653808	Hs.632195	NM_152338	ENSG00000174992	ZG16	JCLN|JCLN1|ZG16A	zymogen granule protein 16	protein-coding
MEIS1_in_LV-MEIS1_peak_2538	chr19	6828967	6828967	+	37.4863	NA	intron (NM_005428, intron 13 of 26)	intron (NM_005428, intron 13 of 26)	56299	NM_005428	7409	Hs.116237	NM_005428	ENSG00000141968	VAV1	VAV	vav guanine nucleotide exchange factor 1	protein-coding
MEIS1_in_LV-MEIS1_peak_3466	chr3	53130480	53130480	+	37.4863	NA	promoter-TSS (NM_052859)	promoter-TSS (NM_052859)	-26	NM_052859	91869	Hs.631910	NM_052859	ENSG00000163933	RFT1	CDG1N	RFT1 homolog	protein-coding
MEIS1_in_LV-MEIS1_peak_3168	chr20	31604331	31604331	+	37.4863	NA	promoter-TSS (NM_181353)	promoter-TSS (NM_181353)	-952	NM_181353	3397	Hs.504609	NM_002165	ENSG00000125968	ID1	ID|bHLHb24	inhibitor of DNA binding 1, HLH protein	protein-coding
MEIS1_in_LV-MEIS1_peak_1888	chr14	55889449	55889449	+	37.4863	NA	Intergenic	Intergenic	-92775	NR_026797	645687	Hs.569345	NR_026796		LINC00520	C14orf34	long intergenic non-protein coding RNA 520	ncRNA
MEIS1_in_LV-MEIS1_peak_1752	chr13	94369906	94369906	+	37.4863	NA	intron (NM_005708, intron 6 of 8)	intron (NM_005708, intron 6 of 8)	109776	NM_001129889	1638	Hs.301865	NM_001922	ENSG00000080166	DCT	TRP-2|TYRP2	dopachrome tautomerase	protein-coding
MEIS1_in_LV-MEIS1_peak_4685	chr6	49556631	49556631	+	37.4863	NA	Intergenic	Intergenic	6231	NM_001145652	135398	Hs.722010	NM_153344	ENSG00000197261	C6orf141	-	chromosome 6 open reading frame 141	protein-coding
MEIS1_in_LV-MEIS1_peak_3399	chr3	18988138	18988138	+	37.3357	NA	Intergenic	Intergenic	-160387	NM_144633	131096	Hs.475656	NM_144633	ENSG00000183960	KCNH8	ELK|ELK1|Kv12.1|elk3	potassium voltage-gated channel subfamily H member 8	protein-coding
MEIS1_in_LV-MEIS1_peak_1569	chr12	121687120	121687120	+	37.2037	NA	Intergenic	CpG	-17466	NM_173855	283385	Hs.434154	NM_173855	ENSG00000139714	MORN3	-	MORN repeat containing 3	protein-coding
MEIS1_in_LV-MEIS1_peak_583	chr1	223706679	223706679	+	37.0292	NA	intron (NM_001146068, intron 1 of 20)	MIRb|SINE|MIR	5086	NM_001146068	824	Hs.350899	NM_001748	ENSG00000162909	CAPN2	CANP2|CANPL2|CANPml|mCANP	calpain 2	protein-coding
MEIS1_in_LV-MEIS1_peak_343	chr1	155934503	155934503	+	37.0069	NA	promoter-TSS (NM_014949)	promoter-TSS (NM_014949)	-61	NM_014949	22889	Hs.24656	NM_014949	ENSG00000132680	KHDC4	BLOM7|KIAA0907|SNORA80EHG	KH domain containing 4, pre-mRNA splicing factor	protein-coding
MEIS1_in_LV-MEIS1_peak_1403	chr12	74610815	74610815	+	37.0069	NA	Intergenic	MIR|SINE|MIR	73044	NM_001136262	552889	Hs.744849	NM_001136262	ENSG00000253719	ATXN7L3B	lnc-SCA7	ataxin 7 like 3B	protein-coding
MEIS1_in_LV-MEIS1_peak_5275	chr7	110283253	110283253	+	36.9162	NA	Intergenic	Intergenic	-323040	NR_003024	442720	Hs.530096	NR_003024	ENSG00000237064	EIF3IP1	RG208K23	eukaryotic translation initiation factor 3 subunit I pseudogene 1	pseudo
MEIS1_in_LV-MEIS1_peak_581	chr1	222623100	222623100	+	36.8182	NA	intron (NM_198551, intron 2 of 27)	intron (NM_198551, intron 2 of 27)	4998	NM_001324064	375056	Hs.118474	NM_198551	ENSG00000154305	MIA3	ARNT|D320|TANGO|TANGO1|UNQ6077	MIA family member 3, ER export factor	protein-coding
MEIS1_in_LV-MEIS1_peak_134	chr1	56627748	56627748	+	36.8182	NA	TTS (NR_135111)	TTS (NR_135111)	-17569	NM_006252	5563	Hs.437039	NM_006252	ENSG00000162409	PRKAA2	AMPK|AMPK2|AMPKa2|PRKAA	protein kinase AMP-activated catalytic subunit alpha 2	protein-coding
MEIS1_in_LV-MEIS1_peak_2109	chr16	20704529	20704529	+	36.8025	NA	Intergenic	Intergenic	-6741	NM_001318890	116285	Hs.306812	NM_052956	ENSG00000166743	ACSM1	BUCS1|MACS1	acyl-CoA synthetase medium chain family member 1	protein-coding
MEIS1_in_LV-MEIS1_peak_5115	chr7	70568951	70568951	+	36.8025	NA	intron (NM_015570, intron 5 of 18)	intron (NM_015570, intron 5 of 18)	-563586	NM_022479	64409	Hs.488591	NM_022479	ENSG00000185274	GALNT17	GALNACT17|GALNT16|GALNT20|GALNTL3|GalNAc-T17|GalNAc-T19|GalNAc-T5L|WBSCR17	polypeptide N-acetylgalactosaminyltransferase 17	protein-coding
MEIS1_in_LV-MEIS1_peak_4810	chr6	119476153	119476153	+	36.8025	NA	intron (NR_046100, intron 1 of 5)	intron (NR_046100, intron 1 of 5)	15149	NR_046100	285762	Hs.571063	NR_046100		LOC285762	-	uncharacterized LOC285762	ncRNA
MEIS1_in_LV-MEIS1_peak_3197	chr20	51703966	51703966	+	36.8025	NA	intron (NM_006045, intron 4 of 27)	intron (NM_006045, intron 4 of 27)	64445	NM_006045	10079	Hs.649234	NM_006045	ENSG00000054793	ATP9A	ATPIIA	ATPase phospholipid transporting 9A (putative)	protein-coding
MEIS1_in_LV-MEIS1_peak_5453	chr8	29738712	29738712	+	36.8025	NA	intron (NR_026765, intron 1 of 3)	intron (NR_026765, intron 1 of 3)	9397	NR_026765	619351	Hs.566911	NR_026765	ENSG00000251191	LINC00589	C8orf75|TSLNC8	long intergenic non-protein coding RNA 589	ncRNA
MEIS1_in_LV-MEIS1_peak_3009	chr2	185385359	185385359	+	36.8025	NA	Intergenic	LTR108d_Mam|LTR|ERVL	-218287	NR_136319	105373782	Hs.128285	NR_136319		LOC105373782	-	uncharacterized LOC105373782	ncRNA
MEIS1_in_LV-MEIS1_peak_1714	chr13	80882325	80882325	+	36.7154	NA	Intergenic	Intergenic	-136066	NR_125770	103724386	Hs.539622	NR_125770		LINC00377	TCONS_00021861	long intergenic non-protein coding RNA 377	ncRNA
MEIS1_in_LV-MEIS1_peak_1362	chr12	63764608	63764608	+	36.7154	NA	Intergenic	LTR40a|LTR|ERVL	-15195	NM_014254	10329	Hs.216386	NM_014254	ENSG00000118600	RXYLT1	HP10481|MDDGA10|TMEM5	ribitol xylosyltransferase 1	protein-coding
MEIS1_in_LV-MEIS1_peak_3110	chr2	226615303	226615303	+	36.7154	NA	Intergenic	Intergenic	43490	NR_049887	100847053		NR_049887	ENSG00000263363	MIR5702	-	microRNA 5702	ncRNA
MEIS1_in_LV-MEIS1_peak_4952	chr7	12942737	12942737	+	36.7092	NA	Intergenic	MIRc|SINE|MIR	255451	NM_005738	10124	Hs.245540	NM_005738	ENSG00000122644	ARL4A	ARL4	ADP ribosylation factor like GTPase 4A	protein-coding
MEIS1_in_LV-MEIS1_peak_3832	chr3	189304961	189304961	+	36.6326	NA	intron (NM_198485, intron 4 of 5)	intron (NM_198485, intron 4 of 5)	-64367	NR_046722	100874027	Hs.616080	NR_046722	ENSG00000230115	TPRG1-AS2	-	TPRG1 antisense RNA 2	ncRNA
MEIS1_in_LV-MEIS1_peak_1359	chr12	63458346	63458346	+	36.6119	NA	Intergenic	Intergenic	210228	NM_173812	283417	Hs.533644	NM_173812	ENSG00000177990	DPY19L2	SPATA34|SPGF9	dpy-19 like 2	protein-coding
MEIS1_in_LV-MEIS1_peak_5853	chr9	127771495	127771495	+	36.6119	NA	promoter-TSS (NM_001252334)	promoter-TSS (NM_001252334)	-126	NM_005489	10044	Hs.306412	NM_005489	ENSG00000095370	SH2D3C	CHAT|NSP3|PRO34088|SHEP1	SH2 domain containing 3C	protein-coding
MEIS1_in_LV-MEIS1_peak_1286	chr12	51222704	51222704	+	36.6119	NA	Intergenic	L2a|LINE|L2	-4949	NM_001330422	5463	Hs.555886	NM_002702	ENSG00000184271	POU6F1	BRN5|MPOU|TCFB1	POU class 6 homeobox 1	protein-coding
MEIS1_in_LV-MEIS1_peak_3872	chr4	18021876	18021876	+	36.6119	NA	promoter-TSS (NM_153686)	promoter-TSS (NM_153686)	-1	NM_001166139	254251	Hs.446201	NM_153686	ENSG00000178177	LCORL	MLR1	ligand dependent nuclear receptor corepressor like	protein-coding
MEIS1_in_LV-MEIS1_peak_4616	chr6	19455137	19455137	+	36.5982	NA	intron (NR_134615, intron 1 of 1)	intron (NR_134615, intron 1 of 1)	5316	NR_134615	105374960	Hs.519913	NR_134615		LOC105374960	-	uncharacterized LOC105374960	ncRNA
MEIS1_in_LV-MEIS1_peak_4885	chr6	158300786	158300786	+	36.5583	NA	Intergenic	HERVK11-int|LTR|ERVK	-11874	NM_020245	56995	Hs.486993	NM_020245	ENSG00000130338	TULP4	TUSP	tubby like protein 4	protein-coding
MEIS1_in_LV-MEIS1_peak_1452	chr12	91718395	91718395	+	36.4218	NA	Intergenic	Intergenic	423318	NR_046159	256021	Hs.651357	NM_001256373	ENSG00000257242	LINC01619	C12orf79	long intergenic non-protein coding RNA 1619	ncRNA
MEIS1_in_LV-MEIS1_peak_2547	chr19	8362134	8362134	+	36.3139	NA	Intergenic	Intergenic	-1993	NM_139314	51129	Hs.9613	NM_016109	ENSG00000167772	ANGPTL4	ARP4|FIAF|HARP|HFARP|NL2|PGAR|TGQTL|UNQ171|pp1158	angiopoietin like 4	protein-coding
MEIS1_in_LV-MEIS1_peak_2639	chr19	23914750	23914750	+	36.3139	NA	promoter-TSS (NM_001244038)	promoter-TSS (NM_001244038)	-132	NM_001244038	730087	Hs.655305	NM_001190829	ENSG00000213967	ZNF726	-	zinc finger protein 726	protein-coding
MEIS1_in_LV-MEIS1_peak_2916	chr2	100066487	100066487	+	36.3139	NA	intron (NM_001025108, intron 2 of 23)	intron (NM_001025108, intron 2 of 23)	39096	NM_001025108	3899	Hs.444414	NM_002285	ENSG00000144218	AFF3	LAF4|MLLT2-like	AF4/FMR2 family member 3	protein-coding
MEIS1_in_LV-MEIS1_peak_5442	chr8	27583788	27583788	+	36.3139	NA	Intergenic	Intergenic	26963	NR_106902	102465508		NR_106902	ENSG00000284280	MIR6843	hsa-mir-6843	microRNA 6843	ncRNA
MEIS1_in_LV-MEIS1_peak_2314	chr17	43842860	43842860	+	36.3139	NA	Intergenic	Intergenic	-4288	NM_001168323	146894	Hs.147313	NM_145273	ENSG00000161649	CD300LG	CLM-9|CLM9|NEPMUCIN|TREM-4|TREM4	CD300 molecule like family member g	protein-coding
MEIS1_in_LV-MEIS1_peak_2608	chr19	18522468	18522468	+	36.3139	NA	promoter-TSS (NM_006532)	promoter-TSS (NM_006532)	-341	NM_006532	8178	Hs.515260	NM_006532	ENSG00000105656	ELL	C19orf17|ELL1|MEN|PPP1R68	elongation factor for RNA polymerase II	protein-coding
MEIS1_in_LV-MEIS1_peak_5514	chr8	74576541	74576541	+	36.3139	NA	Intergenic	Intergenic	-23325	NR_033830	441355	Hs.647162	NR_033830	ENSG00000254349	MIR2052HG	-	MIR2052 host gene	ncRNA
MEIS1_in_LV-MEIS1_peak_2722	chr19	50889748	50889748	+	36.3139	NA	intron (NR_002948, intron 3 of 4)	LTR40a|LTR|ERVL	6650	NR_002948	606293	Hs.643424	NR_002948	ENSG00000197588	KLKP1	KARMA|KLK31P|KRSP1|PsiKLK1|YKLK1	kallikrein pseudogene 1	pseudo
MEIS1_in_LV-MEIS1_peak_111	chr1	44986618	44986618	+	36.3139	NA	5' UTR (NM_001261418, exon 1 of 11)	5' UTR (NM_001261418, exon 1 of 11)	104	NM_001261418	8891	Hs.533549	NM_020365	ENSG00000070785	EIF2B3	EIF-2B|EIF2Bgamma	eukaryotic translation initiation factor 2B subunit gamma	protein-coding
MEIS1_in_LV-MEIS1_peak_4670	chr6	46893861	46893861	+	36.3139	NA	intron (NM_015234, intron 3 of 20)	intron (NM_015234, intron 3 of 20)	-9610	NR_110658	101926962	Hs.680113	NR_110658		LOC101926962	-	uncharacterized LOC101926962	ncRNA
MEIS1_in_LV-MEIS1_peak_1521	chr12	109312102	109312102	+	36.3109	NA	Intergenic	Intergenic	-2882	NM_213596	121643	Hs.528316	NM_213596	ENSG00000139445	FOXN4	-	forkhead box N4	protein-coding
MEIS1_in_LV-MEIS1_peak_413	chr1	177898378	177898378	+	36.2629	NA	Intergenic	Intergenic	71537	NM_033127	89866	Hs.149540	NM_033127	ENSG00000120341	SEC16B	LZTR2|PGPR-p117|RGPR|RGPR-p117|SEC16S	SEC16 homolog B, endoplasmic reticulum export factor	protein-coding
MEIS1_in_LV-MEIS1_peak_477	chr1	193059390	193059390	+	36.1932	NA	promoter-TSS (NM_015984)	promoter-TSS (NM_015984)	3	NM_001199261	51377	Hs.145469	NM_015984	ENSG00000116750	UCHL5	CGI-70|INO80R|UCH-L5|UCH37	ubiquitin C-terminal hydrolase L5	protein-coding
MEIS1_in_LV-MEIS1_peak_4322	chr5	60280985	60280985	+	36.1688	NA	intron (NM_001165899, intron 1 of 16)	intron (NM_001165899, intron 1 of 16)	-206728	NR_024617	25859	Hs.146312	NM_001039499	ENSG00000152931	PART1	NCRNA00206	prostate androgen-regulated transcript 1 (non-protein coding)	ncRNA
MEIS1_in_LV-MEIS1_peak_279	chr1	148335052	148335052	+	36.057	NA	promoter-TSS (NR_049810)	promoter-TSS (NR_049810)	-498	NR_049810	100847044		NR_049810	ENSG00000283676	MIR5087	-	microRNA 5087	ncRNA
MEIS1_in_LV-MEIS1_peak_4280	chr5	37736224	37736224	+	36.0534	NA	intron (NM_001345998, intron 17 of 17)	intron (NM_001345998, intron 17 of 17)	98598	NM_001278098	2668	Hs.248114	NM_000514	ENSG00000168621	GDNF	ATF|ATF1|ATF2|HFB1-GDNF|HSCR3	glial cell derived neurotrophic factor	protein-coding
MEIS1_in_LV-MEIS1_peak_3942	chr4	69495931	69495931	+	36.0371	NA	promoter-TSS (NM_001297615)	promoter-TSS (NM_001297615)	-23	NM_021139	7363	Hs.285887	NM_021139	ENSG00000156096	UGT2B4	HLUG25|UDPGT2B4|UDPGTH1|UDPGTh-1|UGT2B11	UDP glucuronosyltransferase family 2 member B4	protein-coding
MEIS1_in_LV-MEIS1_peak_4150	chr4	142697523	142697523	+	35.9887	NA	intron (NM_003866, intron 2 of 26)	intron (NM_003866, intron 2 of 26)	149012	NM_003866	8821	Hs.176376	NM_003866	ENSG00000109452	INPP4B	-	inositol polyphosphate-4-phosphatase type II B	protein-coding
MEIS1_in_LV-MEIS1_peak_3038	chr2	195322558	195322558	+	35.8591	NA	Intergenic	Intergenic	-334250	NM_001127257	57181	Hs.650158	NM_020342	ENSG00000196950	SLC39A10	LZT-Hs2	solute carrier family 39 member 10	protein-coding
MEIS1_in_LV-MEIS1_peak_274	chr1	147541404	147541404	+	35.7582	NA	promoter-TSS (NM_004326)	promoter-TSS (NM_004326)	-97	NM_004326	607	Hs.415209	NM_004326	ENSG00000116128	BCL9	LGS	B cell CLL/lymphoma 9	protein-coding
MEIS1_in_LV-MEIS1_peak_3626	chr3	121970323	121970323	+	35.7539	NA	Intergenic	MER31-int|LTR|ERV1	51957	NM_175924	286676	Hs.98484	NM_175924	ENSG00000145103	ILDR1	DFNB42|ILDR1alpha|ILDR1alpha'|ILDR1beta	immunoglobulin like domain containing receptor 1	protein-coding
MEIS1_in_LV-MEIS1_peak_4611	chr6	15245424	15245424	+	35.7397	NA	promoter-TSS (NM_004973)	promoter-TSS (NM_004973)	-551	NM_004973	3720	Hs.269059	NM_004973	ENSG00000008083	JARID2	JMJ	jumonji and AT-rich interaction domain containing 2	protein-coding
MEIS1_in_LV-MEIS1_peak_4857	chr6	140988873	140988873	+	35.7099	NA	Intergenic	Intergenic	305059	NR_039675	100616180		NR_039675	ENSG00000264390	MIR4465	-	microRNA 4465	ncRNA
MEIS1_in_LV-MEIS1_peak_5367	chr7	139758558	139758558	+	35.7097	NA	intron (NM_022740, intron 1 of 14)	MER1B|DNA|hAT-Charlie	19336	NM_022740	28996	Hs.731417	NM_022740	ENSG00000064393	HIPK2	PRO0593	homeodomain interacting protein kinase 2	protein-coding
MEIS1_in_LV-MEIS1_peak_2530	chr19	3573959	3573959	+	35.678	NA	intron (NM_006339, intron 3 of 9)	CpG-13301	1014	NM_006339	10362	Hs.406534	NM_006339	ENSG00000064961	HMG20B	BRAF25|BRAF35|HMGX2|HMGXB2|PP7706|SMARCE1r|SOXL|pp8857	high mobility group 20B	protein-coding
MEIS1_in_LV-MEIS1_peak_3683	chr3	148625538	148625538	+	35.6605	NA	Intergenic	Intergenic	-72333	NM_000685	185	Hs.477887	NM_000685	ENSG00000144891	AGTR1	AG2S|AGTR1B|AT1|AT1AR|AT1B|AT1BR|AT1R|AT2R1|HAT1R	angiotensin II receptor type 1	protein-coding
MEIS1_in_LV-MEIS1_peak_4201	chr4	175548038	175548038	+	35.6581	NA	Intergenic	Intergenic	239638	NM_001261448	2823	Hs.75819	NM_005277	ENSG00000150625	GPM6A	GPM6|M6A	glycoprotein M6A	protein-coding
MEIS1_in_LV-MEIS1_peak_1879	chr14	50763603	50763603	+	35.6463	NA	intron (NM_182944, intron 15 of 29)	intron (NM_182944, intron 15 of 29)	-58194	NR_135258	105370489	Hs.569387	NR_135258	ENSG00000258843	LOC105370489	-	uncharacterized LOC105370489	ncRNA
MEIS1_in_LV-MEIS1_peak_5539	chr8	80592522	80592522	+	35.6463	NA	Intergenic	Intergenic	106309	NM_001105539	65986	Hs.591868	NM_023929	ENSG00000205189	ZBTB10	RINZF	zinc finger and BTB domain containing 10	protein-coding
MEIS1_in_LV-MEIS1_peak_548	chr1	212229066	212229066	+	35.6053	NA	intron (NR_125984, intron 3 of 3)	intron (NR_125984, intron 3 of 3)	5670	NR_125982	101929541	Hs.632493	NR_125982	ENSG00000226251	LOC101929541	-	uncharacterized LOC101929541	ncRNA
MEIS1_in_LV-MEIS1_peak_3826	chr3	188528630	188528630	+	35.6007	NA	intron (NM_001167671, intron 5 of 10)	MIRc|SINE|MIR	40036	NR_046623	100873917	Hs.674993	NR_046623	ENSG00000224563	LPP-AS1	-	LPP antisense RNA 1	ncRNA
MEIS1_in_LV-MEIS1_peak_1718	chr13	82269481	82269481	+	35.5873	NA	Intergenic	Intergenic	-1042498	NR_047494	100861546	Hs.539621	NR_047494	ENSG00000260094	LINC00564	-	long intergenic non-protein coding RNA 564	ncRNA
MEIS1_in_LV-MEIS1_peak_4689	chr6	51119014	51119014	+	35.5312	NA	Intergenic	Intergenic	300288	NM_003221	7021	Hs.33102	NM_003221	ENSG00000008196	TFAP2B	AP-2B|AP2-B|PDA2	transcription factor AP-2 beta	protein-coding
MEIS1_in_LV-MEIS1_peak_4714	chr6	64432015	64432015	+	35.5312	NA	intron (NM_001292009, intron 28 of 43)	intron (NM_001292009, intron 28 of 43)	785489	NM_015153	23469	Hs.348921	NM_015153	ENSG00000118482	PHF3	-	PHD finger protein 3	protein-coding
MEIS1_in_LV-MEIS1_peak_4233	chr5	14272460	14272460	+	35.5312	NA	intron (NR_134469, intron 2 of 56)	intron (NR_134469, intron 2 of 56)	128758	NR_134469	7204	Hs.130031	NM_007118	ENSG00000038382	TRIO	ARHGEF23|MEBAS|MRD44|tgat	trio Rho guanine nucleotide exchange factor	protein-coding
MEIS1_in_LV-MEIS1_peak_867	chr10	125757253	125757253	+	35.5312	NA	intron (NR_110857, intron 24 of 24)	L1MCc|LINE|L1	-5193	NR_120633	101927983	Hs.634269	NR_120633	ENSG00000236991	EDRF1-AS1	-	EDRF1 antisense RNA 1	ncRNA
MEIS1_in_LV-MEIS1_peak_522	chr1	205495667	205495667	+	35.5312	NA	Intergenic	Intergenic	-8889	NM_212502	5129	Hs.445402	NM_002596	ENSG00000117266	CDK18	PCTAIRE|PCTAIRE3|PCTK3	cyclin dependent kinase 18	protein-coding
MEIS1_in_LV-MEIS1_peak_3013	chr2	187853779	187853779	+	35.5286	NA	Intergenic	L1MC1|LINE|L1	-299274	NM_001329239	7035	Hs.516578	NM_006287	ENSG00000003436	TFPI	EPI|LACI|TFI|TFPI1	tissue factor pathway inhibitor	protein-coding
MEIS1_in_LV-MEIS1_peak_5502	chr8	66714187	66714187	+	35.5286	NA	intron (NM_001033578, intron 1 of 16)	intron (NM_001033578, intron 1 of 16)	1769	NM_001033578	23678	Hs.613417	NM_013257	ENSG00000104205	SGK3	CISK|SGK2|SGKL	serum/glucocorticoid regulated kinase family member 3	protein-coding
MEIS1_in_LV-MEIS1_peak_1716	chr13	81988051	81988051	+	35.5136	NA	Intergenic	MER67C|LTR|ERV1	-761068	NR_047494	100861546	Hs.539621	NR_047494	ENSG00000260094	LINC00564	-	long intergenic non-protein coding RNA 564	ncRNA
MEIS1_in_LV-MEIS1_peak_4229	chr5	11725134	11725134	+	35.5048	NA	intron (NR_109988, intron 2 of 21)	intron (NR_109988, intron 2 of 21)	-136217	NM_001288716	1501	Hs.314543	NM_001332	ENSG00000169862	CTNND2	GT24|NPRAP	catenin delta 2	protein-coding
MEIS1_in_LV-MEIS1_peak_5598	chr8	112268250	112268250	+	35.4968	NA	intron (NM_198123, intron 59 of 70)	intron (NM_198123, intron 59 of 70)	-375243	NR_031745	100302225		NR_031745	ENSG00000238399	MIR2053	hsa-mir-2053	microRNA 2053	ncRNA
MEIS1_in_LV-MEIS1_peak_3027	chr2	191798150	191798150	+	35.4968	NA	Intergenic	Intergenic	49130	NM_004657	8436	Hs.26530	NM_004657	ENSG00000168497	CAVIN2	PS-p68|SDPR|SDR|cavin-2	caveolae associated protein 2	protein-coding
MEIS1_in_LV-MEIS1_peak_4281	chr5	37738988	37738988	+	35.4031	NA	intron (NM_001345998, intron 17 of 17)	intron (NM_001345998, intron 17 of 17)	95834	NM_001278098	2668	Hs.248114	NM_000514	ENSG00000168621	GDNF	ATF|ATF1|ATF2|HFB1-GDNF|HSCR3	glial cell derived neurotrophic factor	protein-coding
MEIS1_in_LV-MEIS1_peak_3669	chr3	144291375	144291375	+	35.2867	NA	Intergenic	L1PA11|LINE|L1	318050	NM_001134470	205428	Hs.288954	NM_173552	ENSG00000181744	C3orf58	DIA1|GoPro49|HASF	chromosome 3 open reading frame 58	protein-coding
MEIS1_in_LV-MEIS1_peak_4687	chr6	49915166	49915166	+	35.1997	NA	Intergenic	Intergenic	34278	NM_001166478	403339	Hs.558270	NM_001166478	ENSG00000214643	DEFB133	-	defensin beta 133	protein-coding
MEIS1_in_LV-MEIS1_peak_5587	chr8	107338838	107338838	+	35.1474	NA	intron (NM_001199859, intron 2 of 8)	intron (NM_001199859, intron 2 of 8)	-2323	NM_001314051	284	Hs.369675	NM_001146	ENSG00000154188	ANGPT1	AGP1|AGPT|ANG1	angiopoietin 1	protein-coding
MEIS1_in_LV-MEIS1_peak_2937	chr2	113325039	113325039	+	35.1474	NA	Intergenic	CpG	-46118	NM_003466	7849	Hs.469728	NM_003466	ENSG00000125618	PAX8	-	paired box 8	protein-coding
MEIS1_in_LV-MEIS1_peak_5769	chr9	86640268	86640268	+	35.1474	NA	Intergenic	Intergenic	-285781	NM_001185074	79670	Hs.597057	NM_024617	ENSG00000083223	TUT7	PAPD6|TENT3B|ZCCHC6	terminal uridylyl transferase 7	protein-coding
MEIS1_in_LV-MEIS1_peak_5464	chr8	37302822	37302822	+	35.1474	NA	Intergenic	Intergenic	191091	NR_121620	100507420	Hs.105962	NR_121620		LINC01605	-	long intergenic non-protein coding RNA 1605	ncRNA
MEIS1_in_LV-MEIS1_peak_849	chr10	104122023	104122023	+	35.1474	NA	promoter-TSS (NM_145247)	promoter-TSS (NM_145247)	-35	NM_145247	119392	Hs.93667	NM_145247	ENSG00000156384	SFR1	C10orf78|MEI5|MEIR5|bA373N18.1	SWI5 dependent homologous recombination repair protein 1	protein-coding
MEIS1_in_LV-MEIS1_peak_2761	chr2	5111784	5111784	+	35.1474	NA	Intergenic	Intergenic	-455562	NR_034134	727982	Hs.444391	NR_034134	ENSG00000231532	LINC01249	-	long intergenic non-protein coding RNA 1249	ncRNA
MEIS1_in_LV-MEIS1_peak_3287	chr21	41783768	41783768	+	35.1474	NA	Intergenic	LTR3B|LTR|ERVK	-16679	NM_020639	54101	Hs.517310	NM_020639	ENSG00000183421	RIPK4	ANKK2|ANKRD3|DIK|NKRD3|PKK|PPS2|RIP4	receptor interacting serine/threonine kinase 4	protein-coding
MEIS1_in_LV-MEIS1_peak_5452	chr8	29327566	29327566	+	35.1474	NA	Intergenic	Intergenic	21239	NM_057158	1846	Hs.417962	NM_001394	ENSG00000120875	DUSP4	HVH2|MKP-2|MKP2|TYP	dual specificity phosphatase 4	protein-coding
MEIS1_in_LV-MEIS1_peak_191	chr1	94783736	94783736	+	35.1474	NA	intron (NR_104131, intron 1 of 4)	intron (NR_104131, intron 1 of 4)	36545	NR_104131	101928079	Hs.596857	NR_104131	ENSG00000224081	SLC44A3-AS1	LINC01057|XLOC_000303	SLC44A3 antisense RNA 1	ncRNA
MEIS1_in_LV-MEIS1_peak_3696	chr3	152269605	152269605	+	34.9739	NA	promoter-TSS (NR_027037)	promoter-TSS (NR_027037)	21	NR_027037	401093	Hs.725347	NR_027037	ENSG00000229619	MBNL1-AS1	-	MBNL1 antisense RNA 1	ncRNA
MEIS1_in_LV-MEIS1_peak_399	chr1	171372736	171372736	+	34.9739	NA	Intergenic	L2b|LINE|L2	33840	NR_002719	7151	Hs.661092	NR_002719		TOP1P1	-	DNA topoisomerase I pseudogene 1	pseudo
MEIS1_in_LV-MEIS1_peak_1169	chr12	12403989	12403989	+	34.9277	NA	intron (NM_058169, intron 2 of 3)	intron (NM_058169, intron 2 of 3)	46910	NM_058169	118426	Hs.504805	NM_058169	ENSG00000165714	BORCS5	LOH12CR1|LOH1CR12	BLOC-1 related complex subunit 5	protein-coding
MEIS1_in_LV-MEIS1_peak_4688	chr6	50093348	50093348	+	34.6159	NA	Intergenic	Intergenic	-44697	NM_001037498	245915	Hs.571092	NM_001037498	ENSG00000180872	DEFB112	DEFB-12	defensin beta 112	protein-coding
MEIS1_in_LV-MEIS1_peak_5795	chr9	102095502	102095502	+	34.6037	NA	Intergenic	Intergenic	-356922	NM_133445	116443	Hs.654783	NM_133445	ENSG00000198785	GRIN3A	GluN3A|NMDAR-L|NR3A	glutamate ionotropic receptor NMDA type subunit 3A	protein-coding
MEIS1_in_LV-MEIS1_peak_1684	chr13	65290655	65290655	+	34.4929	NA	Intergenic	Intergenic	-575392	NR_132362	105370242	Hs.578051	NR_132362		LINC01052	-	long intergenic non-protein coding RNA 1052	ncRNA
MEIS1_in_LV-MEIS1_peak_4897	chr6	168196622	168196622	+	34.4313	NA	Intergenic	Intergenic	29895	NR_134590	105378137	Hs.549668	NR_134590	ENSG00000237987	LOC105378137	-	uncharacterized LOC105378137	ncRNA
MEIS1_in_LV-MEIS1_peak_3017	chr2	189150291	189150291	+	34.4313	NA	intron (NM_000393, intron 1 of 53)	intron (NM_000393, intron 1 of 53)	-17180	NR_036076	100422908		NR_036076	ENSG00000264725	MIR3129	mir-3129	microRNA 3129	ncRNA
MEIS1_in_LV-MEIS1_peak_728	chr10	37173730	37173730	+	34.4061	NA	intron (NM_052997, intron 19 of 35)	intron (NM_052997, intron 19 of 35)	47873	NM_052997	91074	Hs.373787	NM_052997	ENSG00000148513	ANKRD30A	NY-BR-1	ankyrin repeat domain 30A	protein-coding
MEIS1_in_LV-MEIS1_peak_4449	chr5	123868482	123868482	+	34.3966	NA	Intergenic	Intergenic	323065	NM_001270572	1456	Hs.129206	NM_004384	ENSG00000151292	CSNK1G3	CKI-gamma 3|CSNK1G3L	casein kinase 1 gamma 3	protein-coding
MEIS1_in_LV-MEIS1_peak_3076	chr2	211958150	211958150	+	34.0728	NA	intron (NM_001042599, intron 2 of 26)	intron (NM_001042599, intron 2 of 26)	468210	NR_031643	100313771		NR_031643	ENSG00000221782	MIR548F2	MIR548F-2|MIRN548F2|hsa-mir-548f-2	microRNA 548f-2	ncRNA
MEIS1_in_LV-MEIS1_peak_1217	chr12	26032877	26032877	+	34.0388	NA	intron (NM_001164747, intron 2 of 5)	intron (NM_001164747, intron 2 of 5)	-19681	NM_001164746	11228	Hs.696433	NM_007211	ENSG00000123094	RASSF8	C12orf2|HOJ1	Ras association domain family member 8	protein-coding
MEIS1_in_LV-MEIS1_peak_4534	chr5	149937856	149937856	+	33.9873	NA	intron (NM_000440, intron 1 of 21)	MIRb|SINE|MIR	-4879	NR_110534	644762	Hs.730366	NR_110534		LOC644762	-	mitochondrial fission factor pseudogene	pseudo
MEIS1_in_LV-MEIS1_peak_4484	chr5	131672418	131672418	+	33.9873	NA	exon (NM_001346114, exon 13 of 17)	exon (NM_001346114, exon 13 of 17)	-37182	NM_001164389	51735	Hs.483329	NM_016340	ENSG00000158987	RAPGEF6	KIA001LB|PDZ-GEF2|PDZGEF2|RA-GEF-2|RAGEF2	Rap guanine nucleotide exchange factor 6	protein-coding
MEIS1_in_LV-MEIS1_peak_4617	chr6	19465980	19465980	+	33.9873	NA	Intergenic	Intergenic	16159	NR_134615	105374960	Hs.519913	NR_134615		LOC105374960	-	uncharacterized LOC105374960	ncRNA
MEIS1_in_LV-MEIS1_peak_5811	chr9	109301274	109301274	+	33.9873	NA	intron (NM_018424, intron 1 of 15)	L1MC5a|LINE|L1	19690	NM_018424	54566	Hs.591901	NM_018424	ENSG00000095203	EPB41L4B	CG1|EHM2	erythrocyte membrane protein band 4.1 like 4B	protein-coding
MEIS1_in_LV-MEIS1_peak_4772	chr6	100229034	100229034	+	33.9873	NA	Intergenic	CpG	234641	NM_005068	6492	Hs.520293	NM_005068	ENSG00000112246	SIM1	bHLHe14	SIM bHLH transcription factor 1	protein-coding
MEIS1_in_LV-MEIS1_peak_558	chr1	217349170	217349170	+	33.8805	NA	Intergenic	Intergenic	-211415	NM_001134285	2104	Hs.444225	NM_001438	ENSG00000196482	ESRRG	ERR-gamma|ERR3|ERRg|ERRgamma|NR3B3	estrogen related receptor gamma	protein-coding
MEIS1_in_LV-MEIS1_peak_428	chr1	180074074	180074074	+	33.8271	NA	intron (NM_014810, intron 27 of 37)	intron (NM_014810, intron 27 of 37)	-80759	NM_002826	5768	Hs.744925	NM_002826	ENSG00000116260	QSOX1	Q6|QSCN6	quiescin sulfhydryl oxidase 1	protein-coding
MEIS1_in_LV-MEIS1_peak_4888	chr6	158799613	158799613	+	33.7363	NA	intron (NM_001111077, intron 2 of 13)	intron (NM_001111077, intron 2 of 13)	-18366	NR_102425	101409257	Hs.571207	NR_102425		EZR-AS1	-	EZR antisense RNA 1	ncRNA
MEIS1_in_LV-MEIS1_peak_1674	chr13	62243588	62243588	+	33.7259	NA	intron (NR_125787, intron 3 of 3)	L2a|LINE|L2	31306	NR_125787	103752583	Hs.578048	NR_125787		LINC01075	-	long intergenic non-protein coding RNA 1075	ncRNA
MEIS1_in_LV-MEIS1_peak_5290	chr7	113677722	113677722	+	33.6889	NA	Intergenic	Intergenic	241305	NM_002711	5506	Hs.458309	NM_002711	ENSG00000154415	PPP1R3A	GM|PP1G|PPP1R3	protein phosphatase 1 regulatory subunit 3A	protein-coding
MEIS1_in_LV-MEIS1_peak_441	chr1	183053086	183053086	+	33.4697	NA	intron (NM_002293, intron 1 of 27)	intron (NM_002293, intron 1 of 27)	29626	NM_002293	3915	Hs.609663	NM_002293	ENSG00000135862	LAMC1	LAMB2	laminin subunit gamma 1	protein-coding
MEIS1_in_LV-MEIS1_peak_4780	chr6	106347417	106347417	+	33.4691	NA	Intergenic	Intergenic	-21597	NM_001286107	9474	Hs.486063	NM_004849	ENSG00000057663	ATG5	APG5|APG5-LIKE|APG5L|ASP|SCAR25|hAPG5	autophagy related 5	protein-coding
MEIS1_in_LV-MEIS1_peak_880	chr11	6390414	6390414	+	33.3872	NA	promoter-TSS (NM_000543)	promoter-TSS (NM_000543)	0	NM_001007593	6609	Hs.498173	NM_000543	ENSG00000166311	SMPD1	ASM|ASMASE|NPD	sphingomyelin phosphodiesterase 1	protein-coding
MEIS1_in_LV-MEIS1_peak_2092	chr16	2223536	2223536	+	33.3872	NA	promoter-TSS (NM_001288776)	promoter-TSS (NM_001288776)	48	NM_004424	1877	Hs.513268	NM_004424	ENSG00000167967	E4F1	E4F	E4F transcription factor 1	protein-coding
MEIS1_in_LV-MEIS1_peak_805	chr10	77287840	77287840	+	33.3872	NA	intron (NM_001271518, intron 1 of 27)	intron (NM_001271518, intron 1 of 27)	62921	NM_001322838	3778	Hs.144795	NM_002247	ENSG00000156113	KCNMA1	BKTM|CADEDS|KCa1.1|MaxiK|PNKD3|SAKCA|SLO|SLO-ALPHA|SLO1|bA205K10.1|hSlo|mSLO1	potassium calcium-activated channel subfamily M alpha 1	protein-coding
MEIS1_in_LV-MEIS1_peak_5511	chr8	73614571	73614571	+	33.3872	NA	intron (NM_001164384, intron 6 of 10)	X7B_LINE|LINE|CR1	132356	NM_001164380	27067	Hs.561815	NM_014393	ENSG00000040341	STAU2	39K2|39K3	staufen double-stranded RNA binding protein 2	protein-coding
MEIS1_in_LV-MEIS1_peak_5210	chr7	96508556	96508556	+	33.3872	NA	Intergenic	MIRc|SINE|MIR	-5033	NM_001201450	7979	Hs.489201	NM_006304	ENSG00000127922	SEM1	C7orf76|DSS1|ECD|SHFD1|SHFM1|SHSF1|Shfdg1	SEM1, 26S proteasome complex subunit	protein-coding
MEIS1_in_LV-MEIS1_peak_3102	chr2	222796915	222796915	+	33.3522	NA	Intergenic	L2a|LINE|L2	-64099	NM_004457	2181	Hs.655772	NM_004457	ENSG00000123983	ACSL3	ACS3|FACL3|LACS 3|LACS3|PRO2194	acyl-CoA synthetase long chain family member 3	protein-coding
MEIS1_in_LV-MEIS1_peak_4456	chr5	125176246	125176246	+	33.3026	NA	intron (NR_109882, intron 4 of 5)	intron (NR_109882, intron 4 of 5)	139415	NR_109882	101927421	Hs.121305	NR_109882		LOC101927421	-	uncharacterized LOC101927421	ncRNA
MEIS1_in_LV-MEIS1_peak_2004	chr15	43127875	43127875	+	33.3026	NA	Intergenic	Intergenic	-5240	NM_001347019	80021	Hs.511175	NM_024956	ENSG00000137842	TMEM62	-	transmembrane protein 62	protein-coding
MEIS1_in_LV-MEIS1_peak_2209	chr16	80837774	80837774	+	33.2962	NA	intron (NR_131948, intron 2 of 2)	intron (NR_131948, intron 2 of 2)	-33496	NM_152342	124359	Hs.60257	NM_152342	ENSG00000166446	CDYL2	PCCP1	chromodomain Y like 2	protein-coding
MEIS1_in_LV-MEIS1_peak_5770	chr9	87119541	87119541	+	33.2962	NA	Intergenic	Intergenic	-29103	NM_001001709	401535	Hs.657740	NM_001001709		C9orf170	-	chromosome 9 open reading frame 170	protein-coding
MEIS1_in_LV-MEIS1_peak_1837	chr14	37527508	37527508	+	33.2962	NA	intron (NM_001195296, intron 14 of 14)	intron (NM_001195296, intron 14 of 14)	67612	NM_004496	3169	Hs.163484	NM_004496	ENSG00000129514	FOXA1	HNF3A|TCF3A	forkhead box A1	protein-coding
MEIS1_in_LV-MEIS1_peak_3621	chr3	120894382	120894382	+	33.1153	NA	Intergenic	Intergenic	-13821	NM_014980	9515	Hs.477315	NM_014980	ENSG00000145087	STXBP5L	LLGL4	syntaxin binding protein 5 like	protein-coding
MEIS1_in_LV-MEIS1_peak_3908	chr4	41319760	41319760	+	33.111	NA	Intergenic	L2c|LINE|L2	-39847	NM_001289124	22998	Hs.335163	NM_014988	ENSG00000064042	LIMCH1	LIMCH1A|LMO7B	LIM and calponin homology domains 1	protein-coding
MEIS1_in_LV-MEIS1_peak_3555	chr3	97258175	97258175	+	32.9656	NA	intron (NM_001080448, intron 5 of 17)	L2a|LINE|L2	-181418	NM_173655	285220	Hs.272208	NM_173655	ENSG00000080224	EPHA6	EHK-2|EHK2|EK12|EPA6|HEK12|PRO57066	EPH receptor A6	protein-coding
MEIS1_in_LV-MEIS1_peak_2879	chr2	73828921	73828921	+	32.9475	NA	promoter-TSS (NM_201647)	promoter-TSS (NM_201647)	5	NM_201647	10617	Hs.469018	NM_006463	ENSG00000124356	STAMBP	AMSH|MICCAP	STAM binding protein	protein-coding
MEIS1_in_LV-MEIS1_peak_1315	chr12	54765908	54765908	+	32.9475	NA	Intergenic	Intergenic	-88607	NM_058173	118430	Hs.348419	NM_058173	ENSG00000172551	MUCL1	SBEM	mucin like 1	protein-coding
MEIS1_in_LV-MEIS1_peak_2993	chr2	180368344	180368344	+	32.9475	NA	Intergenic	Intergenic	-323760	NR_104319	101669767		NR_104319	ENSG00000281131	SCHLAP1	LINC00913|PCAT11|PCAT114	SWI/SNF complex antagonist associated with prostate cancer 1 (non-protein coding)	ncRNA
MEIS1_in_LV-MEIS1_peak_2156	chr16	52929949	52929949	+	32.9475	NA	Intergenic	Intergenic	122924	NR_136518	105371267	Hs.147562	NR_136518	ENSG00000277639	LOC105371267	PR-lncRNA-1	p53-regulated lncRNA 1	ncRNA
MEIS1_in_LV-MEIS1_peak_5247	chr7	102493431	102493431	+	32.9475	NA	intron (NM_001277335, intron 15 of 19)	intron (NM_001277335, intron 15 of 19)	-14497	NM_006234	5439	Hs.654952	NM_006234	ENSG00000005075	POLR2J	POLR2J1|RPB11|RPB11A|RPB11m|hRPB14	RNA polymerase II subunit J	protein-coding
MEIS1_in_LV-MEIS1_peak_3940	chr4	69389357	69389357	+	32.9475	NA	Intergenic	Intergenic	106551	NM_001297615	7363	Hs.285887	NM_021139	ENSG00000156096	UGT2B4	HLUG25|UDPGT2B4|UDPGTH1|UDPGTh-1|UGT2B11	UDP glucuronosyltransferase family 2 member B4	protein-coding
MEIS1_in_LV-MEIS1_peak_1518	chr12	107057285	107057285	+	32.9016	NA	intron (NM_004075, intron 1 of 12)	intron (NM_004075, intron 1 of 12)	36572	NM_004075	1407	Hs.151573	NM_004075	ENSG00000008405	CRY1	DSPD|PHLL1	cryptochrome circadian regulator 1	protein-coding
MEIS1_in_LV-MEIS1_peak_4509	chr5	141320819	141320819	+	32.8363	NA	promoter-TSS (NM_005642)	promoter-TSS (NM_005642)	-35	NM_005642	6879	Hs.438838	NM_005642	ENSG00000178913	TAF7	TAF2F|TAFII55	TATA-box binding protein associated factor 7	protein-coding
MEIS1_in_LV-MEIS1_peak_1097	chr11	108593738	108593738	+	32.8363	NA	promoter-TSS (NM_015065)	promoter-TSS (NM_015065)	0	NM_001308019	23086	Hs.28540	NM_015065	ENSG00000110723	EXPH5	SLAC2-B|SLAC2B	exophilin 5	protein-coding
MEIS1_in_LV-MEIS1_peak_4194	chr4	169119767	169119767	+	32.8363	NA	intron (NM_020870, intron 8 of 11)	intron (NM_020870, intron 8 of 11)	-109450	NM_032783	84869	Hs.659311	NM_032783	ENSG00000145439	CBR4	SDR45C1	carbonyl reductase 4	protein-coding
MEIS1_in_LV-MEIS1_peak_969	chr11	59107036	59107036	+	32.8363	NA	promoter-TSS (NM_001142703)	promoter-TSS (NM_001142703)	-149	NM_001142704	374393	Hs.186579	NM_198947	ENSG00000189057	FAM111B	CANP|POIKTMP	family with sequence similarity 111 member B	protein-coding
MEIS1_in_LV-MEIS1_peak_5263	chr7	106217405	106217405	+	32.8363	NA	Intergenic	Intergenic	67787	NM_005746	10135	Hs.489615	NM_005746	ENSG00000105835	NAMPT	1110035O14Rik|PBEF|PBEF1|VF|VISFATIN	nicotinamide phosphoribosyltransferase	protein-coding
MEIS1_in_LV-MEIS1_peak_720	chr10	33799547	33799547	+	32.8363	NA	Intergenic	Intergenic	-26867	NR_038932	100505583	Hs.568804	NR_038932	ENSG00000261683	LINC00838	-	long intergenic non-protein coding RNA 838	ncRNA
MEIS1_in_LV-MEIS1_peak_23	chr1	11737440	11737440	+	32.8363	NA	intron (NM_001040195, intron 1 of 3)	intron (NM_001040195, intron 1 of 3)	1355	NM_001040194	57085	Hs.464438	NM_020350	ENSG00000177674	AGTRAP	ATRAP	angiotensin II receptor associated protein	protein-coding
MEIS1_in_LV-MEIS1_peak_4480	chr5	128403606	128403606	+	32.8302	NA	intron (NM_001999, intron 8 of 64)	intron (NM_001999, intron 8 of 64)	134436	NM_001999	2201	Hs.519294	NM_001999	ENSG00000138829	FBN2	CCA|DA9|EOMD	fibrillin 2	protein-coding
MEIS1_in_LV-MEIS1_peak_3784	chr3	176856077	176856077	+	32.821	NA	Intergenic	Intergenic	-39076	NR_110819	101928684	Hs.639352	NR_110819	ENSG00000228308	LINC01209	-	long intergenic non-protein coding RNA 1209	ncRNA
MEIS1_in_LV-MEIS1_peak_2342	chr17	59155246	59155246	+	32.7385	NA	promoter-TSS (NM_018304)	promoter-TSS (NM_018304)	193	NM_182620	348235	Hs.463607	NM_182620	ENSG00000182628	SKA2	FAM33A	spindle and kinetochore associated complex subunit 2	protein-coding
MEIS1_in_LV-MEIS1_peak_479	chr1	195005484	195005484	+	32.7212	NA	Intergenic	ERVL-E-int|LTR|ERVL	1576997	NR_039888	100616363		NR_039888	ENSG00000265986	MIR4735	-	microRNA 4735	ncRNA
MEIS1_in_LV-MEIS1_peak_2417	chr18	14784337	14784337	+	32.6329	NA	exon (NM_001145029, exon 13 of 36)	exon (NM_001145029, exon 13 of 36)	36097	NM_001145029	374860	Hs.567889	NM_001029862	ENSG00000180777	ANKRD30B	NY-BR-1.1	ankyrin repeat domain 30B	protein-coding
MEIS1_in_LV-MEIS1_peak_4223	chr5	10273	10273	+	32.6082	NA	Intergenic	(TAACCC)n|Simple_repeat|Simple_repeat	-129985	NM_052909	153478	Hs.535800	NM_052909	ENSG00000153404	PLEKHG4B	-	pleckstrin homology and RhoGEF domain containing G4B	protein-coding
MEIS1_in_LV-MEIS1_peak_3988	chr4	88335177	88335177	+	32.6082	NA	intron (NR_134238, intron 3 of 4)	MSTB1|LTR|ERVL-MaLR	-43562	NM_001165136	55008	Hs.529317	NM_017912	ENSG00000138642	HERC6	-	HECT and RLD domain containing E3 ubiquitin protein ligase family member 6	protein-coding
MEIS1_in_LV-MEIS1_peak_3698	chr3	152794149	152794149	+	32.6082	NA	Intergenic	L2b|LINE|L2	-40544	NM_002563	5028	Hs.79881	NM_002563	ENSG00000169860	P2RY1	P2Y1|SARCC	purinergic receptor P2Y1	protein-coding
MEIS1_in_LV-MEIS1_peak_4756	chr6	91694458	91694458	+	32.579	NA	Intergenic	Intergenic	-4030	NR_104154	101929083	Hs.586238	NR_104154		CASC6	-	cancer susceptibility 6 (non-protein coding)	ncRNA
MEIS1_in_LV-MEIS1_peak_1395	chr12	71605237	71605237	+	32.5361	NA	Intergenic	Intergenic	-58660	NM_031435	83591	Hs.245798	NM_031435	ENSG00000173451	THAP2	-	THAP domain containing 2	protein-coding
MEIS1_in_LV-MEIS1_peak_4203	chr4	175714721	175714721	+	32.5361	NA	intron (NM_201592, intron 1 of 6)	intron (NM_201592, intron 1 of 6)	72955	NM_001261448	2823	Hs.75819	NM_005277	ENSG00000150625	GPM6A	GPM6|M6A	glycoprotein M6A	protein-coding
MEIS1_in_LV-MEIS1_peak_51	chr1	21648040	21648040	+	32.3315	NA	intron (NM_001145658, intron 2 of 24)	intron (NM_001145658, intron 2 of 24)	3815	NM_001145658	5909	Hs.148178	NM_002885	ENSG00000076864	RAP1GAP	RAP1GA1|RAP1GAP1|RAP1GAPII|RAPGAP	RAP1 GTPase activating protein	protein-coding
MEIS1_in_LV-MEIS1_peak_1520	chr12	108691744	108691744	+	32.3274	NA	intron (NM_014325, intron 2 of 10)	intron (NM_014325, intron 2 of 10)	11254	NM_001105237	23603	Hs.330384	NM_014325	ENSG00000110880	CORO1C	HCRNN4	coronin 1C	protein-coding
MEIS1_in_LV-MEIS1_peak_518	chr1	204821576	204821576	+	32.3274	NA	Intergenic	Intergenic	-7078	NM_001160333	23114	Hs.13349	NM_015090	ENSG00000163531	NFASC	NF|NRCAML	neurofascin	protein-coding
MEIS1_in_LV-MEIS1_peak_302	chr1	150576077	150576077	+	32.3274	NA	3' UTR (NM_001197320, exon 4 of 4)	3' UTR (NM_001197320, exon 4 of 4)	-1525	NR_104133	574406	Hs.516243	NM_001025493	ENSG00000203804	ADAMTSL4-AS1	C1orf138	ADAMTSL4 antisense RNA 1	ncRNA
MEIS1_in_LV-MEIS1_peak_4425	chr5	116532928	116532928	+	32.3274	NA	intron (NM_020796, intron 1 of 18)	intron (NM_020796, intron 1 of 18)	41998	NM_001300780	57556	Hs.156967	NM_020681	ENSG00000092421	SEMA6A	HT018|SEMA|SEMA6A1|SEMAQ|VIA	semaphorin 6A	protein-coding
MEIS1_in_LV-MEIS1_peak_1541	chr12	114813359	114813359	+	32.2149	NA	Intergenic	Intergenic	-129195	NM_005996	6926	Hs.744016	NM_005996	ENSG00000135111	TBX3	TBX3-ISO|UMS|XHL	T-box 3	protein-coding
MEIS1_in_LV-MEIS1_peak_748	chr10	55221546	55221546	+	32.2149	NA	Intergenic	Intergenic	-377444	NM_001190478	100463289	Hs.727204	NM_001190478	ENSG00000249860	MTRNR2L5	HN5	MT-RNR2 like 5	protein-coding
MEIS1_in_LV-MEIS1_peak_2992	chr2	180356884	180356884	+	32.2149	NA	Intergenic	L1PBb|LINE|L1	-335220	NR_104319	101669767		NR_104319	ENSG00000281131	SCHLAP1	LINC00913|PCAT11|PCAT114	SWI/SNF complex antagonist associated with prostate cancer 1 (non-protein coding)	ncRNA
MEIS1_in_LV-MEIS1_peak_1178	chr12	12890903	12890903	+	32.2149	NA	promoter-TSS (NM_003979)	promoter-TSS (NM_003979)	-119	NM_003979	9052	Hs.631733	NM_003979	ENSG00000013588	GPRC5A	GPCR5A|PEIG-1|RAI3|RAIG1|TIG1	G protein-coupled receptor class C group 5 member A	protein-coding
MEIS1_in_LV-MEIS1_peak_2590	chr19	12791342	12791342	+	32.1849	NA	promoter-TSS (NM_002229)	promoter-TSS (NM_002229)	-154	NM_002229	3726	Hs.25292	NM_002229	ENSG00000171223	JUNB	AP-1	JunB proto-oncogene, AP-1 transcription factor subunit	protein-coding
MEIS1_in_LV-MEIS1_peak_3978	chr4	87305073	87305073	+	32.1849	NA	3' UTR (NM_001136230, exon 6 of 6)	3' UTR (NM_001136230, exon 6 of 6)	-4490	NR_049891	100847027		NR_049891	ENSG00000263981	MIR5705	-	microRNA 5705	ncRNA
MEIS1_in_LV-MEIS1_peak_5393	chr7	151232471	151232471	+	32.1849	NA	promoter-TSS (NM_001284295)	promoter-TSS (NM_001284295)	-18	NM_019015	54480	Hs.647084	NM_019015	ENSG00000033100	CHPF2	CSGLCA-T|CSGlcAT|ChSy-3|chPF-2	chondroitin polymerizing factor 2	protein-coding
MEIS1_in_LV-MEIS1_peak_655	chr1	245045726	245045726	+	32.0604	NA	intron (NM_001143943, intron 2 of 6)	MER51A|LTR|ERV1	-74857	NR_111907	101928068	Hs.134857	NR_111907		LOC101928068	-	uncharacterized LOC101928068	ncRNA
MEIS1_in_LV-MEIS1_peak_1199	chr12	20701304	20701304	+	32.0389	NA	intron (NM_017435, intron 2 of 14)	intron (NM_017435, intron 2 of 14)	5839	NM_001145944	53919	Hs.47261	NM_017435	ENSG00000139155	SLCO1C1	OATP-F|OATP1|OATP14|OATP1C1|OATPF|OATPRP5|SLC21A14	solute carrier organic anion transporter family member 1C1	protein-coding
MEIS1_in_LV-MEIS1_peak_1467	chr12	94615671	94615671	+	31.9808	NA	intron (NM_020698, intron 1 of 3)	intron (NM_020698, intron 1 of 3)	480	NM_001301036	57458	Hs.370410	NM_020698	ENSG00000057704	TMCC3	-	transmembrane and coiled-coil domain family 3	protein-coding
MEIS1_in_LV-MEIS1_peak_1314	chr12	54387745	54387745	+	31.9537	NA	intron (NM_001130968, intron 1 of 6)	MIRb|SINE|MIR	-1956	NM_001290004	25946	Hs.505653	NM_015481	ENSG00000161642	ZNF385A	HZF|RZF|ZFP385|ZNF385	zinc finger protein 385A	protein-coding
MEIS1_in_LV-MEIS1_peak_3770	chr3	174341147	174341147	+	31.9537	NA	Intergenic	Intergenic	-420351	NR_046664	100874010	Hs.624265	NR_046664	ENSG00000228213	NLGN1-AS1	-	NLGN1 antisense RNA 1	ncRNA
MEIS1_in_LV-MEIS1_peak_4045	chr4	101921452	101921452	+	31.9537	NA	intron (NM_001127507, intron 6 of 15)	intron (NM_001127507, intron 6 of 15)	107626	NM_001083907	55024	Hs.480400	NM_017935	ENSG00000153064	BANK1	BANK	B cell scaffold protein with ankyrin repeats 1	protein-coding
MEIS1_in_LV-MEIS1_peak_3781	chr3	175312921	175312921	+	31.9537	NA	intron (NM_207015, intron 4 of 13)	intron (NM_207015, intron 4 of 13)	-41825	NR_046713	100874244	Hs.581176	NR_046713		NAALADL2-AS2	-	NAALADL2 antisense RNA 2	ncRNA
MEIS1_in_LV-MEIS1_peak_3613	chr3	115784590	115784590	+	31.9537	NA	Intergenic	CpG	161286	NM_002045	2596	Hs.134974	NM_002045	ENSG00000172020	GAP43	B-50|PP46	growth associated protein 43	protein-coding
MEIS1_in_LV-MEIS1_peak_5968	chrY	57217070	57217070	+	31.9537	NA	Intergenic	(TTAGGG)n|Simple_repeat|Simple_repeat	-2367	NR_110561	727856	Hs.740212	NR_110561		DDX11L16	-	DEAD/H-box helicase 11 like 16	pseudo
MEIS1_in_LV-MEIS1_peak_3540	chr3	89496942	89496942	+	31.9532	NA	Intergenic	Intergenic	389418	NM_005233	2042	Hs.123642	NM_005233	ENSG00000044524	EPHA3	EK4|ETK|ETK1|HEK|HEK4|TYRO4	EPH receptor A3	protein-coding
MEIS1_in_LV-MEIS1_peak_2336	chr17	54979999	54979999	+	31.6949	NA	intron (NM_178509, intron 1 of 17)	intron (NM_178509, intron 1 of 17)	-11214	NM_004375	1353	Hs.591171	NM_004375	ENSG00000166260	COX11	COX11P	COX11, cytochrome c oxidase copper chaperone	protein-coding
MEIS1_in_LV-MEIS1_peak_900	chr11	14892511	14892511	+	31.6949	NA	promoter-TSS (NM_024514)	promoter-TSS (NM_024514)	-306	NM_024514	120227	Hs.371427	NM_024514	ENSG00000186104	CYP2R1	-	cytochrome P450 family 2 subfamily R member 1	protein-coding
MEIS1_in_LV-MEIS1_peak_4787	chr6	108684964	108684964	+	31.6949	NA	TTS (NM_001455)	TTS (NM_001455)	-66690	NR_033376	387111	Hs.520310	NR_033376	ENSG00000203801	LINC00222	C6orf181|NCRNA00222|dJ354J5.2	long intergenic non-protein coding RNA 222	ncRNA
MEIS1_in_LV-MEIS1_peak_342	chr1	155308646	155308646	+	31.6949	NA	promoter-TSS (NM_001135822)	promoter-TSS (NM_001135822)	-102	NM_002004	2224	Hs.335918	NM_002004	ENSG00000160752	FDPS	FPPS|FPS|POROK9	farnesyl diphosphate synthase	protein-coding
MEIS1_in_LV-MEIS1_peak_1145	chr12	6235765	6235765	+	31.6949	NA	intron (NM_001330312, intron 6 of 7)	intron (NM_001330312, intron 6 of 7)	35449	NM_001769	928	Hs.114286	NM_001769	ENSG00000010278	CD9	BTCC-1|DRAP-27|MIC3|MRP-1|TSPAN-29|TSPAN29	CD9 molecule	protein-coding
MEIS1_in_LV-MEIS1_peak_2944	chr2	120245638	120245638	+	31.6949	NA	Intergenic	Intergenic	-7200	NM_002881	5899	Hs.469820	NM_002881	ENSG00000144118	RALB	-	RAS like proto-oncogene B	protein-coding
MEIS1_in_LV-MEIS1_peak_1557	chr12	120234919	120234919	+	31.6949	NA	intron (NM_001080855, intron 1 of 11)	intron (NM_001080855, intron 1 of 11)	15242	NM_025157	5829	Hs.446336	NM_002859	ENSG00000089159	PXN	-	paxillin	protein-coding
MEIS1_in_LV-MEIS1_peak_3411	chr3	24630053	24630053	+	31.6949	NA	Intergenic	L1MC3|LINE|L1	-108618	NR_039955
MEIS1_in_LV-MEIS1_peak_5147	chr7	80792899	80792899	+	31.6504	NA	intron (NM_006379, intron 11 of 17)	intron (NM_006379, intron 11 of 17)	126452	NM_006379	10512	Hs.269109	NM_006379	ENSG00000075223	SEMA3C	SEMAE|SemE	semaphorin 3C	protein-coding
MEIS1_in_LV-MEIS1_peak_3501	chr3	76954066	76954066	+	31.6321	NA	Intergenic	Intergenic	-86077	NM_001290039	6092	Hs.13305	NM_002942	ENSG00000185008	ROBO2	SAX3	roundabout guidance receptor 2	protein-coding
MEIS1_in_LV-MEIS1_peak_4440	chr5	118768792	118768792	+	31.5444	NA	Intergenic	L2a|LINE|L2	172604	NR_104998	102467225	Hs.582523	NR_104998	ENSG00000249128	LINC02215	-	long intergenic non-protein coding RNA 2215	ncRNA
MEIS1_in_LV-MEIS1_peak_3579	chr3	102476473	102476473	+	31.5095	NA	intron (NM_001329788, intron 10 of 11)	intron (NM_001329788, intron 10 of 11)	41458	NM_001329788	131368	Hs.352213	NM_175056	ENSG00000170044	ZPLD1	-	zona pellucida like domain containing 1	protein-coding
MEIS1_in_LV-MEIS1_peak_5002	chr7	24580691	24580691	+	31.5095	NA	intron (NM_001303037, intron 1 of 11)	intron (NM_001303037, intron 1 of 11)	7345	NM_016447	51678	Hs.533355	NM_016447	ENSG00000105926	MPP6	PALS2|VAM-1|VAM1|p55T	membrane palmitoylated protein 6	protein-coding
MEIS1_in_LV-MEIS1_peak_4974	chr7	17558066	17558066	+	31.5095	NA	intron (NR_110013, intron 1 of 3)	intron (NR_110013, intron 1 of 3)	843	NR_110013	101927630	Hs.583400	NR_110013	ENSG00000236039	LOC101927630	-	uncharacterized LOC101927630	ncRNA
MEIS1_in_LV-MEIS1_peak_4598	chr6	9675311	9675311	+	31.4067	NA	Intergenic	Intergenic	-737007	NR_033910	100130275	Hs.661431	NR_033910		TFAP2A-AS1	-	TFAP2A antisense RNA 1	ncRNA
MEIS1_in_LV-MEIS1_peak_3005	chr2	182079217	182079217	+	31.384	NA	intron (NM_001080545, intron 4 of 4)	intron (NM_001080545, intron 4 of 4)	93393	NR_048566	151242	Hs.10941	NM_001080545	ENSG00000150722	PPP1R1C	IPP5	protein phosphatase 1 regulatory inhibitor subunit 1C	protein-coding
MEIS1_in_LV-MEIS1_peak_1744	chr13	93948748	93948748	+	31.384	NA	intron (NM_005708, intron 3 of 8)	intron (NM_005708, intron 3 of 8)	-90275	NR_046536	100873973	Hs.615939	NR_046536		GPC6-AS2	-	GPC6 antisense RNA 2	ncRNA
MEIS1_in_LV-MEIS1_peak_406	chr1	174799592	174799592	+	31.2951	NA	promoter-TSS (NM_001243765)	promoter-TSS (NM_001243765)	-305	NM_001330989	9910	Hs.585378	NM_014857	ENSG00000152061	RABGAP1L	HHL|TBC1D18	RAB GTPase activating protein 1 like	protein-coding
MEIS1_in_LV-MEIS1_peak_5175	chr7	88391413	88391413	+	31.2853	NA	Intergenic	Intergenic	-84500	NM_001205315	79689	Hs.521008	NM_024636	ENSG00000127954	STEAP4	STAMP2|SchLAH|TIARP|TNFAIP9	STEAP4 metalloreductase	protein-coding
MEIS1_in_LV-MEIS1_peak_776	chr10	72098979	72098979	+	31.2768	NA	intron (NR_045564, intron 9 of 9)	intron (NR_045564, intron 9 of 9)	-9947	NM_001134434	9806	Hs.523009	NM_014767	ENSG00000107742	SPOCK2	testican-2	SPARC (osteonectin), cwcv and kazal like domains proteoglycan 2	protein-coding
MEIS1_in_LV-MEIS1_peak_3499	chr3	74349103	74349103	+	31.2768	NA	intron (NM_020872, intron 10 of 21)	MLT1G|LTR|ERVL-MaLR	172037	NM_020872	5067	Hs.12723	NM_020872	ENSG00000113805	CNTN3	BIG-1|PANG|PCS	contactin 3	protein-coding
MEIS1_in_LV-MEIS1_peak_1672	chr13	62040883	62040883	+	31.2768	NA	Intergenic	Intergenic	-11335	NR_046995	100874143	Hs.552684	NR_046995	ENSG00000229578	LINC00358	-	long intergenic non-protein coding RNA 358	ncRNA
MEIS1_in_LV-MEIS1_peak_388	chr1	168752201	168752201	+	31.2768	NA	Intergenic	Intergenic	-22997	NM_001937	1805	Hs.80552	NM_001937	ENSG00000143196	DPT	TRAMP	dermatopontin	protein-coding
MEIS1_in_LV-MEIS1_peak_4941	chr7	9592183	9592183	+	31.2768	NA	Intergenic	L1PA15|LINE|L1	-42087	NR_002790	168741	Hs.545134	NR_002790		PER4	-	period circadian regulator 3 pseudogene	pseudo
MEIS1_in_LV-MEIS1_peak_1206	chr12	22543700	22543700	+	31.1815	NA	intron (NM_014802, intron 2 of 24)	intron (NM_014802, intron 2 of 24)	846	NM_001286176	9847	Hs.271014	NM_014802	ENSG00000111731	C2CD5	CDP138|KIAA0528	C2 calcium dependent domain containing 5	protein-coding
MEIS1_in_LV-MEIS1_peak_3882	chr4	28260068	28260068	+	31.1246	NA	Intergenic	Intergenic	-559514	NR_036237	100422937		NR_036237	ENSG00000283275	MIR4275	-	microRNA 4275	ncRNA
MEIS1_in_LV-MEIS1_peak_5548	chr8	82964987	82964987	+	31.1246	NA	Intergenic	Intergenic	52883	NR_134295	101927141	Hs.128557	NR_134295	ENSG00000254394	LOC101927141	-	uncharacterized LOC101927141	ncRNA
MEIS1_in_LV-MEIS1_peak_3716	chr3	158652686	158652686	+	31.092	NA	intron (NM_001308164, intron 7 of 18)	intron (NM_001308164, intron 7 of 18)	8158	NM_024996	85476	Hs.518355	NM_024996	ENSG00000168827	GFM1	COXPD1|EFG|EFG1|EFGM|EGF1|GFM|hEFG1	G elongation factor mitochondrial 1	protein-coding
MEIS1_in_LV-MEIS1_peak_3285	chr21	41678492	41678492	+	31.0856	NA	promoter-TSS (NR_024367)	promoter-TSS (NR_024367)	-810	NR_024367	54090	Hs.570442	NR_024367		LINC00111	C21orf21|NCRNA00111	long intergenic non-protein coding RNA 111	ncRNA
MEIS1_in_LV-MEIS1_peak_1063	chr11	94838238	94838238	+	31.0856	NA	intron (NM_001301007, intron 5 of 11)	L2a|LINE|L2	69896	NM_130847	154810	Hs.503594	NM_130847	ENSG00000166025	AMOTL1	JEAP	angiomotin like 1	protein-coding
MEIS1_in_LV-MEIS1_peak_1992	chr15	40092546	40092546	+	31.0856	NA	intron (NM_001003943, intron 3 of 3)	intron (NM_001003943, intron 3 of 3)	13540	NM_001003942	90427	Hs.591104	NM_033503	ENSG00000104081	BMF	-	Bcl2 modifying factor	protein-coding
MEIS1_in_LV-MEIS1_peak_4498	chr5	137292815	137292815	+	31.0856	NA	intron (NM_004598, intron 2 of 10)	intron (NM_004598, intron 2 of 10)	164618	NR_134246	105379192	Hs.124611	NR_134246		LOC105379192	-	uncharacterized LOC105379192	ncRNA
MEIS1_in_LV-MEIS1_peak_4597	chr6	9408859	9408859	+	31.0856	NA	Intergenic	Intergenic	756650	NR_004855	728655	Hs.214343	NR_004855		HULC	HCCAT1|LINC00078|NCRNA00078	hepatocellular carcinoma up-regulated long non-coding RNA	ncRNA
MEIS1_in_LV-MEIS1_peak_2180	chr16	67346602	67346602	+	31.0856	NA	promoter-TSS (NM_001161575)	promoter-TSS (NM_001161575)	-753	NM_001161575	55282	Hs.125139	NM_018296	ENSG00000159708	LRRC36	RORBP70|XLHSRF2	leucine rich repeat containing 36	protein-coding
MEIS1_in_LV-MEIS1_peak_2586	chr19	12401304	12401304	+	31.0856	NA	promoter-TSS (NM_001080821)	promoter-TSS (NM_001080821)	-30	NM_001080821	90576	Hs.546637	NM_203381	ENSG00000196466	ZNF799	HIT-40|ZNF842	zinc finger protein 799	protein-coding
MEIS1_in_LV-MEIS1_peak_2372	chr17	71910114	71910114	+	31.0856	NA	Intergenic	L2a|LINE|L2	115865	NR_110876	102723505	Hs.547482	NR_110876	ENSG00000228639	ROCR	LINC02095	regulator of chondrogenesis RNA	ncRNA
MEIS1_in_LV-MEIS1_peak_3163	chr20	23358172	23358172	+	31.0856	NA	promoter-TSS (NR_109884)	promoter-TSS (NR_109884)	-45	NR_109884	100505683	Hs.140295	NR_109884	ENSG00000232645	LINC01431	-	long intergenic non-protein coding RNA 1431	ncRNA
MEIS1_in_LV-MEIS1_peak_3477	chr3	57323024	57323024	+	31.0856	NA	exon (NM_001291661, exon 64 of 74)	exon (NM_001291661, exon 64 of 74)	-30342	NM_001142733	142686	Hs.665154	NM_130387	ENSG00000239388	ASB14	-	ankyrin repeat and SOCS box containing 14	protein-coding
MEIS1_in_LV-MEIS1_peak_2319	chr17	48214043	48214043	+	31.0856	NA	intron (NM_003726, intron 4 of 12)	intron (NM_003726, intron 4 of 12)	-57532	NR_031607	100302211		NR_031607	ENSG00000221739	MIR1203	MIRN1203|hsa-mir-1203	microRNA 1203	ncRNA
MEIS1_in_LV-MEIS1_peak_1548	chr12	116919879	116919879	+	31.0856	NA	intron (NM_153348, intron 1 of 10)	intron (NM_153348, intron 1 of 10)	8923	NM_153348	26259	Hs.624537	NM_012174	ENSG00000174989	FBXW8	FBW6|FBW8|FBX29|FBXO29|FBXW6	F-box and WD repeat domain containing 8	protein-coding
MEIS1_in_LV-MEIS1_peak_5814	chr9	111443616	111443616	+	31.0738	NA	intron (NM_001080398, intron 5 of 50)	intron (NM_001080398, intron 5 of 50)	41129	NM_001080398	23392	Hs.368255	NM_001080398	ENSG00000136813	ECPAS	ECM29|KIAA0368	Ecm29 proteasome adaptor and scaffold	protein-coding
MEIS1_in_LV-MEIS1_peak_5346	chr7	125648631	125648631	+	31.0466	NA	Intergenic	L1MCb|LINE|L1	-384340	NR_110182	101928254	Hs.571236	NR_110182	ENSG00000219445	LOC101928254	-	uncharacterized LOC101928254	ncRNA
MEIS1_in_LV-MEIS1_peak_3552	chr3	96483943	96483943	+	31.0375	NA	Intergenic	Intergenic	123979	NR_107027	102465864		NR_107027	ENSG00000278103	MIR8060	hsa-mir-8060	microRNA 8060	ncRNA
MEIS1_in_LV-MEIS1_peak_1401	chr12	74317593	74317593	+	31.0211	NA	Intergenic	Intergenic	-24962	NR_038300	100507377	Hs.455715	NR_038300	ENSG00000251138	LOC100507377	-	uncharacterized LOC100507377	ncRNA
MEIS1_in_LV-MEIS1_peak_1236	chr12	38602067	38602067	+	31.0103	NA	Intergenic	Intergenic	285312	NM_001308340	144245	Hs.259305	NM_001013620	ENSG00000175548	ALG10B	ALG10|KCR1	ALG10B, alpha-1,2-glucosyltransferase	protein-coding
MEIS1_in_LV-MEIS1_peak_1394	chr12	70795732	70795732	+	31.0103	NA	intron (NM_002849, intron 2 of 13)	intron (NM_002849, intron 2 of 13)	-6802	NM_001207015	5801	Hs.506076	NM_002849	ENSG00000153233	PTPRR	EC-PTP|PCPTP1|PTP-SL|PTPBR7|PTPRQ	protein tyrosine phosphatase, receptor type R	protein-coding
MEIS1_in_LV-MEIS1_peak_4286	chr5	40366183	40366183	+	31.0103	NA	Intergenic	ERVL-B4-int|LTR|ERVL	-313747	NM_000958	5734	Hs.199248	NM_000958	ENSG00000171522	PTGER4	EP4|EP4R	prostaglandin E receptor 4	protein-coding
MEIS1_in_LV-MEIS1_peak_4920	chr7	3520315	3520315	+	31.0103	NA	intron (NM_152744, intron 1 of 44)	CR1_Mam|LINE|CR1	218867	NM_152744	221935	Hs.653013	NM_152744	ENSG00000146555	SDK1	-	sidekick cell adhesion molecule 1	protein-coding
MEIS1_in_LV-MEIS1_peak_3776	chr3	175063188	175063188	+	30.9644	NA	intron (NM_207015, intron 1 of 13)	intron (NM_207015, intron 1 of 13)	52054	NR_046390	100862679	Hs.148810	NR_046390	ENSG00000230292	NAALADL2-AS3	-	NAALADL2 antisense RNA 3	ncRNA
MEIS1_in_LV-MEIS1_peak_4555	chr5	163967482	163967482	+	30.9644	NA	Intergenic	Intergenic	461954	NM_013283	27430	Hs.54642	NM_013283	ENSG00000038274	MAT2B	MAT-II|MATIIbeta|Nbla02999|SDR23E1|TGR	methionine adenosyltransferase 2B	protein-coding
MEIS1_in_LV-MEIS1_peak_730	chr10	37185519	37185519	+	30.8761	NA	exon (NM_052997, exon 22 of 36)	exon (NM_052997, exon 22 of 36)	59662	NM_052997	91074	Hs.373787	NM_052997	ENSG00000148513	ANKRD30A	NY-BR-1	ankyrin repeat domain 30A	protein-coding
MEIS1_in_LV-MEIS1_peak_731	chr10	37197269	37197269	+	30.8761	NA	intron (NM_052997, intron 27 of 35)	intron (NM_052997, intron 27 of 35)	71412	NM_052997	91074	Hs.373787	NM_052997	ENSG00000148513	ANKRD30A	NY-BR-1	ankyrin repeat domain 30A	protein-coding
MEIS1_in_LV-MEIS1_peak_3410	chr3	24628727	24628727	+	30.8546	NA	Intergenic	Intergenic	-107292	NR_039955
MEIS1_in_LV-MEIS1_peak_20	chr1	8703603	8703603	+	30.7916	NA	intron (NM_001042681, intron 1 of 22)	intron (NM_001042681, intron 1 of 22)	114037	NM_001042681	473	Hs.463041	NM_012102	ENSG00000142599	RERE	ARG|ARP|ATN1L|DNB1|NEDBEH	arginine-glutamic acid dipeptide repeats	protein-coding
MEIS1_in_LV-MEIS1_peak_2213	chr16	80996767	80996767	+	30.7869	NA	intron (NM_020188, intron 2 of 3)	intron (NM_020188, intron 2 of 3)	-9731	NM_001100624	55839	Hs.726537	NM_018455	ENSG00000166451	CENPN	BM039|C16orf60|CENP-N|ICEN32	centromere protein N	protein-coding
MEIS1_in_LV-MEIS1_peak_1352	chr12	62520407	62520407	+	30.7213	NA	intron (NM_015026, intron 8 of 34)	Charlie1a|DNA|hAT-Charlie	53590	NM_015026	23041	Hs.389378	NM_015026	ENSG00000061987	MON2	-	MON2 homolog, regulator of endosome-to-Golgi trafficking	protein-coding
MEIS1_in_LV-MEIS1_peak_5162	chr7	83267324	83267324	+	30.5799	NA	Intergenic	Intergenic	-104443	NM_033026	27445	Hs.12376	NM_014510	ENSG00000186472	PCLO	ACZ|PCH3	piccolo presynaptic cytomatrix protein	protein-coding
MEIS1_in_LV-MEIS1_peak_3738	chr3	167346321	167346321	+	30.5576	NA	intron (NM_024687, intron 9 of 20)	intron (NM_024687, intron 9 of 20)	33962	NM_001199202	79740	Hs.478143	NM_024687	ENSG00000169064	ZBBX	-	zinc finger B-box domain containing	protein-coding
MEIS1_in_LV-MEIS1_peak_5763	chr9	83166695	83166695	+	30.5576	NA	Intergenic	Intergenic	100592	NM_001244962	257019	Hs.127535	NM_174938	ENSG00000172159	FRMD3	4.1O|EPB41L4O|EPB41LO|P410	FERM domain containing 3	protein-coding
MEIS1_in_LV-MEIS1_peak_5627	chr8	133771834	133771834	+	30.5576	NA	Intergenic	Intergenic	5518	NR_125422	101927798	Hs.615036	NR_125422	ENSG00000253165	LOC101927798	-	uncharacterized LOC101927798	ncRNA
MEIS1_in_LV-MEIS1_peak_4606	chr6	11735546	11735546	+	30.5576	NA	intron (NM_032744, intron 4 of 5)	intron (NM_032744, intron 4 of 5)	43501	NM_001143948	84830	Hs.126409	NM_032744	ENSG00000111863	ADTRP	AIG1L|C6orf105|dJ413H6.1	androgen dependent TFPI regulating protein	protein-coding
MEIS1_in_LV-MEIS1_peak_4279	chr5	37717765	37717765	+	30.5576	NA	intron (NM_001345998, intron 13 of 17)	intron (NM_001345998, intron 13 of 17)	117057	NM_001278098	2668	Hs.248114	NM_000514	ENSG00000168621	GDNF	ATF|ATF1|ATF2|HFB1-GDNF|HSCR3	glial cell derived neurotrophic factor	protein-coding
MEIS1_in_LV-MEIS1_peak_5392	chr7	151028772	151028772	+	30.5576	NA	intron (NM_001282293, intron 1 of 14)	CpG	350	NM_001282291	11194	Hs.647118	NM_007188	ENSG00000197150	ABCB8	EST328128|M-ABC1|MABC1	ATP binding cassette subfamily B member 8	protein-coding
MEIS1_in_LV-MEIS1_peak_4282	chr5	38044678	38044678	+	30.5576	NA	Intergenic	Intergenic	96187	NR_134262	105374729	Hs.150642	NR_134262	ENSG00000251518	LINC02110	-	long intergenic non-protein coding RNA 2110	ncRNA
MEIS1_in_LV-MEIS1_peak_5542	chr8	80965621	80965621	+	30.5576	NA	Intergenic	Intergenic	-90840	NM_001033723	619279	Hs.434957	NM_032651	ENSG00000164684	ZNF704	Gig1	zinc finger protein 704	protein-coding
MEIS1_in_LV-MEIS1_peak_1756	chr13	95380799	95380799	+	30.5576	NA	Intergenic	MER66C|LTR|ERV1	-52800	NM_001160100	9071	Hs.534377	NM_006984	ENSG00000134873	CLDN10	CPETRL3|HELIX|OSP-L|OSPL	claudin 10	protein-coding
MEIS1_in_LV-MEIS1_peak_5165	chr7	84529688	84529688	+	30.5482	NA	Intergenic	Intergenic	-2788	NR_110079	101927378	Hs.539042	NR_110079	ENSG00000235139	LOC101927378	-	uncharacterized LOC101927378	ncRNA
MEIS1_in_LV-MEIS1_peak_3400	chr3	19365739	19365739	+	30.4882	NA	intron (NM_144633, intron 5 of 15)	L2a|LINE|L2	-50808	NR_039954	100616291		NR_039954	ENSG00000271898	MIR4791	mir-4791	microRNA 4791	ncRNA
MEIS1_in_LV-MEIS1_peak_3159	chr20	15120118	15120118	+	30.4298	NA	intron (NM_080676, intron 5 of 16)	intron (NM_080676, intron 5 of 16)	-76740	NM_001033087	140733	Hs.661576	NM_080676	ENSG00000172264	MACROD2	C20orf133|C2orf133	MACRO domain containing 2	protein-coding
MEIS1_in_LV-MEIS1_peak_3543	chr3	89526100	89526100	+	30.3864	NA	Intergenic	Intergenic	418576	NM_005233	2042	Hs.123642	NM_005233	ENSG00000044524	EPHA3	EK4|ETK|ETK1|HEK|HEK4|TYRO4	EPH receptor A3	protein-coding
MEIS1_in_LV-MEIS1_peak_5141	chr7	79303714	79303714	+	30.3864	NA	intron (NM_012301, intron 1 of 21)	intron (NM_012301, intron 1 of 21)	-149243	NR_038346	100505881	Hs.31474	NR_038343	ENSG00000234456	MAGI2-AS3	-	MAGI2 antisense RNA 3	ncRNA
MEIS1_in_LV-MEIS1_peak_1090	chr11	107161895	107161895	+	30.3521	NA	Intergenic	L1MA7|LINE|L1	-143450	NM_001256424	2977	Hs.24321	NM_000855	ENSG00000152402	GUCY1A2	GC-SA2|GUC1A2	guanylate cyclase 1 soluble subunit alpha 2	protein-coding
MEIS1_in_LV-MEIS1_peak_1855	chr14	43035862	43035862	+	30.2599	NA	Intergenic	Intergenic	1429006	NM_001346173	145581	Hs.136893	NM_152447	ENSG00000165379	LRFN5	C14orf146|FIGLER8|SALM5	leucine rich repeat and fibronectin type III domain containing 5	protein-coding
MEIS1_in_LV-MEIS1_peak_4038	chr4	101211386	101211386	+	30.2318	NA	intron (NM_001130692, intron 1 of 11)	intron (NM_001130692, intron 1 of 11)	29486	NR_107033	102465868		NR_107033	ENSG00000273882	MIR8066	hsa-mir-8066	microRNA 8066	ncRNA
MEIS1_in_LV-MEIS1_peak_4155	chr4	146367868	146367868	+	30.2318	NA	intron (NM_001317816, intron 4 of 10)	intron (NM_001317816, intron 4 of 10)	-40715	NR_107003	102465837		NR_107003	ENSG00000278438	MIR7849	hsa-mir-7849	microRNA 7849	ncRNA
MEIS1_in_LV-MEIS1_peak_4467	chr5	127694750	127694750	+	30.2318	NA	Intergenic	Intergenic	-8639	NM_001317938	728586	Hs.582532	NM_001317938	ENSG00000230561	CCDC192	LINC01183	coiled-coil domain containing 192	protein-coding
MEIS1_in_LV-MEIS1_peak_3680	chr3	147747294	147747294	+	30.2076	NA	Intergenic	L1PA14|LINE|L1	325967	NR_121655	440982	Hs.535724	NR_121655		LOC440982	-	uncharacterized LOC440982	ncRNA
MEIS1_in_LV-MEIS1_peak_830	chr10	95474813	95474813	+	30.1326	NA	intron (NM_015385, intron 2 of 24)	intron (NM_015385, intron 2 of 24)	-33633	NM_001290298	10580	Hs.38621	NM_006434	ENSG00000095637	SORBS1	CAP|FLAF2|R85FL|SH3D5|SH3P12|SORB1	sorbin and SH3 domain containing 1	protein-coding
MEIS1_in_LV-MEIS1_peak_5321	chr7	120842256	120842256	+	30.1326	NA	intron (NM_012338, intron 2 of 7)	intron (NM_012338, intron 2 of 7)	15867	NM_012338	23554	Hs.16529	NM_012338	ENSG00000106025	TSPAN12	EVR5|NET-2|NET2|TM4SF12	tetraspanin 12	protein-coding
MEIS1_in_LV-MEIS1_peak_1089	chr11	107159434	107159434	+	30.0778	NA	Intergenic	MER21-int|LTR|ERVL	-140989	NM_001256424	2977	Hs.24321	NM_000855	ENSG00000152402	GUCY1A2	GC-SA2|GUC1A2	guanylate cyclase 1 soluble subunit alpha 2	protein-coding
MEIS1_in_LV-MEIS1_peak_2	chr1	811171	811171	+	30.0778	NA	Intergenic	Intergenic	-6200	NR_103536	400728	Hs.568078	NM_207464	ENSG00000177757	FAM87B	-	family with sequence similarity 87 member B	ncRNA
MEIS1_in_LV-MEIS1_peak_568	chr1	219959217	219959217	+	30.0667	NA	Intergenic	Intergenic	-30566	NR_046437	55532	Hs.284450	NM_018713	ENSG00000196660	SLC30A10	HMDPC|HMNDYT1|ZNT10|ZNT8|ZRC1|ZnT-10	solute carrier family 30 member 10	protein-coding
MEIS1_in_LV-MEIS1_peak_5967	chrX	156030550	156030550	+	30.0667	NA	Intergenic	(TTAGGG)n|Simple_repeat|Simple_repeat	-2367	NR_110561	727856	Hs.740212	NR_110561		DDX11L16	-	DEAD/H-box helicase 11 like 16	pseudo
MEIS1_in_LV-MEIS1_peak_1627	chr13	38637771	38637771	+	30.0532	NA	intron (NR_126377, intron 2 of 2)	intron (NR_126377, intron 2 of 2)	48904	NR_126377	101929121	Hs.618449	NR_126377		LINC00437	TCONS_00021639	long intergenic non-protein coding RNA 437	ncRNA
MEIS1_in_LV-MEIS1_peak_1483	chr12	97748538	97748538	+	29.9951	NA	intron (NR_077241, intron 1 of 6)	intron (NR_077241, intron 1 of 6)	5060	NR_077241	643711	Hs.585557	NR_077240	ENSG00000257501	LOC643711	-	platelet activating factor acetylhydrolase 1b catalytic subunit 2 pseudogene	pseudo
MEIS1_in_LV-MEIS1_peak_2432	chr18	24215750	24215750	+	29.9951	NA	intron (NM_018030, intron 3 of 13)	intron (NM_018030, intron 3 of 13)	56482	NM_018030	114876	Hs.370725	NM_018030	ENSG00000141447	OSBPL1A	ORP-1|ORP1|OSBPL1B	oxysterol binding protein like 1A	protein-coding
MEIS1_in_LV-MEIS1_peak_667	chr1	247172130	247172130	+	29.9838	NA	promoter-TSS (NM_001243740)	promoter-TSS (NM_001243740)	-113	NM_001243740	7678	Hs.421238	NM_003431	ENSG00000196418	ZNF124	HZF-16|HZF16|ZK7	zinc finger protein 124	protein-coding
MEIS1_in_LV-MEIS1_peak_5268	chr7	108037899	108037899	+	29.9838	NA	intron (NM_007356, intron 29 of 33)	intron (NM_007356, intron 29 of 33)	-34540	NM_002291	3912	Hs.650585	NM_002291	ENSG00000091136	LAMB1	CLM|LIS5	laminin subunit beta 1	protein-coding
MEIS1_in_LV-MEIS1_peak_4062	chr4	110850681	110850681	+	29.9838	NA	Intergenic	Intergenic	9966	NR_030643	100126354		NR_030643	ENSG00000215961	MIR297	MIRN297|hsa-mir-297	microRNA 297	ncRNA
MEIS1_in_LV-MEIS1_peak_1254	chr12	46509268	46509268	+	29.9761	NA	intron (NR_125380, intron 3 of 3)	intron (NR_125380, intron 3 of 3)	125161	NR_125381	100288798	Hs.525922	NR_125377		LOC100288798	-	uncharacterized LOC100288798	ncRNA
MEIS1_in_LV-MEIS1_peak_4973	chr7	17512341	17512341	+	29.9761	NA	intron (NR_110013, intron 1 of 3)	intron (NR_110013, intron 1 of 3)	46568	NR_110013	101927630	Hs.583400	NR_110013	ENSG00000236039	LOC101927630	-	uncharacterized LOC101927630	ncRNA
MEIS1_in_LV-MEIS1_peak_141	chr1	66697078	66697078	+	29.9687	NA	intron (NM_032291, intron 18 of 24)	intron (NM_032291, intron 18 of 24)	-55379	NM_152665	200132	Hs.479226	NM_152665	ENSG00000152760	TCTEX1D1	-	Tctex1 domain containing 1	protein-coding
MEIS1_in_LV-MEIS1_peak_5218	chr7	98276225	98276225	+	29.9687	NA	Intergenic	Intergenic	-5442	NM_001159491	25798	Hs.567438	NM_015379	ENSG00000164713	BRI3	I3	brain protein I3	protein-coding
MEIS1_in_LV-MEIS1_peak_2805	chr2	35693527	35693527	+	29.7525	NA	Intergenic	L1MA3|LINE|L1	222122	NR_039629	100616475		NR_039629	ENSG00000265301	MIR548AD	-	microRNA 548ad	ncRNA
MEIS1_in_LV-MEIS1_peak_5384	chr7	147485850	147485850	+	29.6427	NA	intron (NM_014141, intron 10 of 23)	intron (NM_014141, intron 10 of 23)	-107729	NR_031645	100313895		NR_031645	ENSG00000221442	MIR548F4	MIR548F-4|MIRN548F4|hsa-mir-548f-4	microRNA 548f-4	ncRNA
MEIS1_in_LV-MEIS1_peak_5045	chr7	44039160	44039160	+	29.4796	NA	non-coding (NR_015401, exon 1 of 3)	non-coding (NR_015401, exon 1 of 3)	111	NR_072982	255031	Hs.633978	NR_015401		LINC00957	-	long intergenic non-protein coding RNA 957	ncRNA
MEIS1_in_LV-MEIS1_peak_496	chr1	201461279	201461279	+	29.4615	NA	Intergenic	L2c|LINE|L2	7892	NR_073080	23612	Hs.153944	NM_012396	ENSG00000174307	PHLDA3	TIH1	pleckstrin homology like domain family A member 3	protein-coding
MEIS1_in_LV-MEIS1_peak_5507	chr8	69025928	69025928	+	29.4615	NA	intron (NR_039986, intron 2 of 4)	intron (NR_039986, intron 2 of 4)	78262	NR_039986	100505718	Hs.122386	NR_039986	ENSG00000253658	LINC01592	-	long intergenic non-protein coding RNA 1592	ncRNA
MEIS1_in_LV-MEIS1_peak_4893	chr6	162605727	162605727	+	29.4615	NA	intron (NM_004562, intron 1 of 11)	intron (NM_004562, intron 1 of 11)	-121405	NM_152410	135138	Hs.25791	NM_152410	ENSG00000112530	PACRG	GLUP|HAK005771|PARK2CRG	parkin coregulated	protein-coding
MEIS1_in_LV-MEIS1_peak_2389	chr17	81365975	81365975	+	29.4301	NA	Intergenic	Intergenic	19150	NM_001347841	100130370	Hs.646594	NM_001272086		LOC100130370	-	uncharacterized LOC100130370	protein-coding
MEIS1_in_LV-MEIS1_peak_3493	chr3	70983988	70983988	+	29.4301	NA	intron (NM_032682, intron 14 of 20)	intron (NM_032682, intron 14 of 20)	80935	NM_001244813	27086	Hs.59368	NM_032682	ENSG00000114861	FOXP1	12CC4|HSPC215|MFH|QRF1|hFKH1B	forkhead box P1	protein-coding
MEIS1_in_LV-MEIS1_peak_5224	chr7	99680012	99680012	+	29.4301	NA	promoter-TSS (NM_001291829)	promoter-TSS (NM_001291829)	14	NM_001190484	1577	Hs.571258	NM_000777	ENSG00000106258	CYP3A5	CP35|CYPIIIA5|P450PCN3|PCN3	cytochrome P450 family 3 subfamily A member 5	protein-coding
MEIS1_in_LV-MEIS1_peak_4899	chr6	170265824	170265824	+	29.4301	NA	TTS (NR_126021)	TTS (NR_126021)	-3255	NR_002787	154449	Hs.447751	NR_002787	ENSG00000230960	LOC154449	-	uncharacterized LOC154449	ncRNA
MEIS1_in_LV-MEIS1_peak_3160	chr20	15440643	15440643	+	29.4301	NA	intron (NM_001033087, intron 3 of 13)	intron (NM_001033087, intron 3 of 13)	243785	NM_001033087	140733	Hs.661576	NM_080676	ENSG00000172264	MACROD2	C20orf133|C2orf133	MACRO domain containing 2	protein-coding
MEIS1_in_LV-MEIS1_peak_3959	chr4	76586162	76586162	+	29.4301	NA	intron (NM_020859, intron 2 of 10)	CpG	10611	NR_039655	100616254		NR_039655	ENSG00000283682	MIR548AH	-	microRNA 548ah	ncRNA
MEIS1_in_LV-MEIS1_peak_954	chr11	46339247	46339247	+	29.4301	NA	intron (NM_201532, intron 1 of 30)	intron (NM_201532, intron 1 of 30)	-6020	NM_201533	8525	Hs.502461	NM_003646	ENSG00000149091	DGKZ	DAGK5|DAGK6|DGK-ZETA|hDGKzeta	diacylglycerol kinase zeta	protein-coding
MEIS1_in_LV-MEIS1_peak_5668	chr9	14027366	14027366	+	29.4301	NA	Intergenic	Intergenic	99395	NR_038194	100113404	Hs.149786	NR_038194	ENSG00000205636	LINC00583	C9orf146	long intergenic non-protein coding RNA 583	ncRNA
MEIS1_in_LV-MEIS1_peak_5707	chr9	34620596	34620596	+	29.4301	NA	promoter-TSS (NM_007234)	promoter-TSS (NM_007234)	-73	NM_024348	11258	Hs.511768	NM_007234	ENSG00000137100	DCTN3	DCTN-22|DCTN22	dynactin subunit 3	protein-coding
MEIS1_in_LV-MEIS1_peak_3958	chr4	76571515	76571515	+	29.4301	NA	intron (NM_020859, intron 2 of 10)	intron (NM_020859, intron 2 of 10)	-2053	NR_039654	100616299		NR_039654	ENSG00000263445	MIR4450	mir-4450	microRNA 4450	ncRNA
MEIS1_in_LV-MEIS1_peak_5698	chr9	33229552	33229552	+	29.4301	NA	Intergenic	Intergenic	-10612	NM_014471	27290	Hs.555934	NM_014471	ENSG00000122711	SPINK4	HEL136|PEC-60|PEC60	serine peptidase inhibitor, Kazal type 4	protein-coding
MEIS1_in_LV-MEIS1_peak_3354	chr22	45534956	45534956	+	29.4301	NA	intron (NM_006486, intron 7 of 16)	intron (NM_006486, intron 7 of 16)	32117	NM_001996	2192	Hs.24601	NM_001996	ENSG00000077942	FBLN1	FBLN|FIBL1	fibulin 1	protein-coding
MEIS1_in_LV-MEIS1_peak_1451	chr12	91663487	91663487	+	29.3865	NA	Intergenic	Intergenic	478226	NR_046159	256021	Hs.651357	NM_001256373	ENSG00000257242	LINC01619	C12orf79	long intergenic non-protein coding RNA 1619	ncRNA
MEIS1_in_LV-MEIS1_peak_5518	chr8	75235921	75235921	+	29.3259	NA	intron (NR_103849, intron 1 of 1)	intron (NR_103849, intron 1 of 1)	42560	NR_103850	101805492	Hs.571424	NR_103848		CASC9	ESCCAL-1|ESSCAL1|LINC00981	cancer susceptibility 9 (non-protein coding)	ncRNA
MEIS1_in_LV-MEIS1_peak_3703	chr3	154786916	154786916	+	29.2115	NA	Intergenic	Intergenic	-292731	NM_000902	4311	Hs.307734	NM_000902	ENSG00000196549	MME	CALLA|CD10|CMT2T|NEP|SCA43|SFE	membrane metalloendopeptidase	protein-coding
MEIS1_in_LV-MEIS1_peak_5401	chr7	158958089	158958089	+	29.1934	NA	Intergenic	Intergenic	-50265	NR_024394	154822	Hs.544783	NM_198345	ENSG00000231419	LINC00689	-	long intergenic non-protein coding RNA 689	ncRNA
MEIS1_in_LV-MEIS1_peak_715	chr10	29105088	29105088	+	29.1934	NA	Intergenic	Intergenic	-183973	NM_032517	84569	Hs.558572	NM_032517	ENSG00000120563	LYZL1	KAAG648|LYC2|LYZD1|PRO1278|bA534G20.1	lysozyme like 1	protein-coding
MEIS1_in_LV-MEIS1_peak_3931	chr4	66035785	66035785	+	29.1934	NA	Intergenic	Intergenic	-241039	NR_031673	100302177		NR_031673	ENSG00000221563	MIR1269A	MIR1269|MIRN1269|hsa-mir-1269|hsa-mir-1269a	microRNA 1269a	ncRNA
MEIS1_in_LV-MEIS1_peak_653	chr1	244719948	244719948	+	29.1934	NA	Intergenic	L1MC2|LINE|L1	66900	NM_001297746	51029	Hs.498317	NM_016076	ENSG00000121644	DESI2	C1orf121|CGI-146|DESI|DESI1|DeSI-2|FAM152A|PNAS-4|PPPDE1	desumoylating isopeptidase 2	protein-coding
MEIS1_in_LV-MEIS1_peak_5111	chr7	67067555	67067555	+	29.1352	NA	intron (NM_018264, intron 10 of 15)	L1M4|LINE|L1	46842	NR_039793	100616310		NR_039793	ENSG00000266525	MIR4650-1	-	microRNA 4650-1	ncRNA
MEIS1_in_LV-MEIS1_peak_3759	chr3	172140923	172140923	+	29.1352	NA	intron (NM_001135095, intron 3 of 25)	intron (NM_001135095, intron 3 of 25)	100369	NM_001135095	64778	Hs.744888	NM_022763	ENSG00000075420	FNDC3B	FAD104|PRO4979|YVTM2421	fibronectin type III domain containing 3B	protein-coding
MEIS1_in_LV-MEIS1_peak_4268	chr5	29780735	29780735	+	29.1352	NA	Intergenic	Intergenic	-99825	NR_134264	105374704	Hs.151157	NR_134264		LOC105374704	-	uncharacterized LOC105374704	ncRNA
MEIS1_in_LV-MEIS1_peak_3583	chr3	102593875	102593875	+	29.0827	NA	Intergenic	Intergenic	158860	NM_001329788	131368	Hs.352213	NM_175056	ENSG00000170044	ZPLD1	-	zona pellucida like domain containing 1	protein-coding
MEIS1_in_LV-MEIS1_peak_2810	chr2	38603582	38603582	+	29.0772	NA	promoter-TSS (NM_001142650)	promoter-TSS (NM_001142650)	-546	NM_001142650	92906	Hs.445497	NM_138394	ENSG00000143889	HNRNPLL	HNRPLL|SRRF	heterogeneous nuclear ribonucleoprotein L like	protein-coding
MEIS1_in_LV-MEIS1_peak_3797	chr3	179147376	179147376	+	29.0771	NA	intron (NR_125401, intron 1 of 2)	intron (NR_125401, intron 1 of 2)	597	NR_125401	101928739	Hs.434553	NR_125401	ENSG00000229102	LOC101928739	-	uncharacterized LOC101928739	ncRNA
MEIS1_in_LV-MEIS1_peak_4251	chr5	20057174	20057174	+	28.9958	NA	intron (NM_001291956, intron 2 of 14)	L2a|LINE|L2	-68930	NM_001167667	1016	Hs.317632	NM_004934	ENSG00000145526	CDH18	CDH14|CDH14L|CDH24	cadherin 18	protein-coding
MEIS1_in_LV-MEIS1_peak_1703	chr13	74979841	74979841	+	28.9892	NA	Intergenic	Intergenic	260540	NR_027466	647288	Hs.567920	NR_027466	ENSG00000214249	CTAGE11P	-	CTAGE family member 11, pseudogene	pseudo
MEIS1_in_LV-MEIS1_peak_2402	chr18	1392980	1392980	+	28.9892	NA	Intergenic	Tigger19a|DNA|TcMar-Tigger	-33351	NR_110327	56651	Hs.541165	NM_031416		LINC00470	C18orf2	long intergenic non-protein coding RNA 470	ncRNA
MEIS1_in_LV-MEIS1_peak_5498	chr8	61734481	61734481	+	28.9892	NA	Intergenic	Intergenic	19693	NR_039680	100616484		NR_039680	ENSG00000264408	MIR4470	mir-4470	microRNA 4470	ncRNA
MEIS1_in_LV-MEIS1_peak_5342	chr7	125358218	125358218	+	28.929	NA	intron (NR_110188, intron 7 of 8)	intron (NR_110188, intron 7 of 8)	-93927	NR_110182	101928254	Hs.571236	NR_110182	ENSG00000219445	LOC101928254	-	uncharacterized LOC101928254	ncRNA
MEIS1_in_LV-MEIS1_peak_663	chr1	247078870	247078870	+	28.923	NA	promoter-TSS (NM_001204220)	promoter-TSS (NM_001204220)	-57	NM_033213	93474	Hs.732305	NM_033213	ENSG00000277462	ZNF670	-	zinc finger protein 670	protein-coding
MEIS1_in_LV-MEIS1_peak_5541	chr8	80746039	80746039	+	28.8707	NA	intron (NM_001033723, intron 2 of 8)	L1M5|LINE|L1	128742	NM_001033723	619279	Hs.434957	NM_032651	ENSG00000164684	ZNF704	Gig1	zinc finger protein 704	protein-coding
MEIS1_in_LV-MEIS1_peak_2934	chr2	113046782	113046782	+	28.853	NA	intron (NM_173178, intron 1 of 4)	L1MC3|LINE|L1	6085	NM_014438	27177	Hs.278909	NM_014438	ENSG00000136696	IL36B	FIL1|FIL1-(ETA)|FIL1H|FILI-(ETA)|IL-1F8|IL-1H2|IL1-ETA|IL1F8|IL1H2	interleukin 36 beta	protein-coding
MEIS1_in_LV-MEIS1_peak_2669	chr19	40466004	40466004	+	28.853	NA	promoter-TSS (NM_000713)	promoter-TSS (NM_000713)	-186	NM_000713	645	Hs.515785	NM_000713	ENSG00000090013	BLVRB	BVRB|FLR|HEL-S-10|SDR43U1	biliverdin reductase B	protein-coding
MEIS1_in_LV-MEIS1_peak_5817	chr9	112718218	112718218	+	28.853	NA	promoter-TSS (NM_021218)	promoter-TSS (NM_021218)	-69	NR_138054	58493	Hs.658575	NM_021218	ENSG00000148153	INIP	C9orf80|HSPC043|MISE|SOSSC|SSBIP1|hSSBIP1	INTS3 and NABP interacting protein	protein-coding
MEIS1_in_LV-MEIS1_peak_4545	chr5	154845054	154845054	+	28.853	NA	intron (NM_032385, intron 1 of 8)	intron (NM_032385, intron 1 of 8)	5631	NM_032385	10826	Hs.519694	NM_016348	ENSG00000170271	FAXDC2	C5orf4	fatty acid hydroxylase domain containing 2	protein-coding
MEIS1_in_LV-MEIS1_peak_2597	chr19	14529281	14529281	+	28.853	NA	promoter-TSS (NM_001313964)	promoter-TSS (NM_001313964)	41	NM_001313964	3337	Hs.515210	NM_006145	ENSG00000132002	DNAJB1	HSPF1|Hdj1|Hsp40|RSPH16B|Sis1	DnaJ heat shock protein family (Hsp40) member B1	protein-coding
MEIS1_in_LV-MEIS1_peak_5220	chr7	99211948	99211948	+	28.853	NA	Intergenic	Intergenic	-4459	NM_001145715	402569	Hs.253050	NM_001145715	ENSG00000185467	KPNA7	IPOA8	karyopherin subunit alpha 7	protein-coding
MEIS1_in_LV-MEIS1_peak_1294	chr12	52970200	52970200	+	28.853	NA	Intergenic	Intergenic	-20334	NM_001256293	3856	Hs.533782	NM_002273	ENSG00000170421	KRT8	CARD2|CK-8|CK8|CYK8|K2C8|K8|KO	keratin 8	protein-coding
MEIS1_in_LV-MEIS1_peak_1580	chr12	122966493	122966493	+	28.853	NA	promoter-TSS (NM_203444)	promoter-TSS (NM_203444)	16	NM_019625	23457	Hs.511951	NM_019624	ENSG00000150967	ABCB9	EST122234|TAPL	ATP binding cassette subfamily B member 9	protein-coding
MEIS1_in_LV-MEIS1_peak_5523	chr8	76690162	76690162	+	28.853	NA	intron (NM_024721, intron 1 of 10)	intron (NM_024721, intron 1 of 10)	-6887	NR_024360	100192378	Hs.596420	NR_024360	ENSG00000253661	ZFHX4-AS1	-	ZFHX4 antisense RNA 1	ncRNA
MEIS1_in_LV-MEIS1_peak_4718	chr6	66302006	66302006	+	28.6584	NA	Intergenic	Intergenic	514127	NR_026540	442229	Hs.390414	NR_026540		SLC25A51P1	MCART3P|bA707M13.1	solute carrier family 25 member 51 pseudogene 1	pseudo
MEIS1_in_LV-MEIS1_peak_4436	chr5	118010181	118010181	+	28.5923	NA	intron (NR_104997, intron 2 of 2)	intron (NR_104997, intron 2 of 2)	-272393	NR_104609	100505811	Hs.369776	NR_104609	ENSG00000250427	LINC02148	HNCAT21	long intergenic non-protein coding RNA 2148	ncRNA
MEIS1_in_LV-MEIS1_peak_4431	chr5	117460398	117460398	+	28.5923	NA	intron (NR_046089, intron 2 of 5)	L2a|LINE|L2	44886	NR_046089	728342	Hs.434420	NR_046089		LINC00992	-	long intergenic non-protein coding RNA 992	ncRNA
MEIS1_in_LV-MEIS1_peak_3065	chr2	207954981	207954981	+	28.5923	NA	intron (NM_001080475, intron 3 of 7)	MER134|DNA?|DNA?	70579	NM_001080475	389072	Hs.159188	NM_001080475	ENSG00000178385	PLEKHM3	DAPR|PLEKHM1L	pleckstrin homology domain containing M3	protein-coding
MEIS1_in_LV-MEIS1_peak_4963	chr7	16300088	16300088	+	28.5923	NA	intron (NM_001101426, intron 5 of 9)	intron (NM_001101426, intron 5 of 9)	89602	NR_038946	100506025	Hs.649029	NR_038946	ENSG00000229688	ISPD-AS1	-	ISPD antisense RNA 1	ncRNA
MEIS1_in_LV-MEIS1_peak_1536	chr12	114611665	114611665	+	28.5107	NA	Intergenic	Intergenic	72499	NM_016569	6926	Hs.744016	NM_005996	ENSG00000135111	TBX3	TBX3-ISO|UMS|XHL	T-box 3	protein-coding
MEIS1_in_LV-MEIS1_peak_385	chr1	168179342	168179342	+	28.4727	NA	intron (NM_001031800, intron 1 of 4)	CpG	497	NM_152902	261726	Hs.209431	NM_152902	ENSG00000143155	TIPRL	TIP|TIP41|TIPRL1	TOR signaling pathway regulator	protein-coding
MEIS1_in_LV-MEIS1_peak_1856	chr14	43399452	43399452	+	28.4422	NA	Intergenic	Intergenic	1107844	NM_032135	84075	Hs.307086	NM_032135	ENSG00000189139	FSCB	C14orf155	fibrous sheath CABYR binding protein	protein-coding
MEIS1_in_LV-MEIS1_peak_5252	chr7	102688574	102688574	+	28.3749	NA	Intergenic	Intergenic	-16845	NM_032959	246721	Hs.610255	NM_032958	ENSG00000267645	POLR2J2	HRPB11B|RPB11b1	RNA polymerase II subunit J2	protein-coding
MEIS1_in_LV-MEIS1_peak_3426	chr3	32082908	32082908	+	28.3071	NA	Intergenic	MER57B1|LTR|ERV1	-23603	NM_015141	23171	Hs.82432	NM_015141	ENSG00000152642	GPD1L	GPD1-L	glycerol-3-phosphate dehydrogenase 1 like	protein-coding
MEIS1_in_LV-MEIS1_peak_3471	chr3	53486002	53486002	+	28.3071	NA	Intergenic	Intergenic	-9047	NM_001128840	776	Hs.476358	NM_000720	ENSG00000157388	CACNA1D	CACH3|CACN4|CACNL1A2|CCHL1A2|Cav1.3|PASNA|SANDD	calcium voltage-gated channel subunit alpha1 D	protein-coding
MEIS1_in_LV-MEIS1_peak_1845	chr14	39024373	39024373	+	28.3071	NA	Intergenic	Intergenic	79155	NM_006364	10484	Hs.272927	NM_006364	ENSG00000100934	SEC23A	CLSD|hSec23A	Sec23 homolog A, coat complex II component	protein-coding
MEIS1_in_LV-MEIS1_peak_1582	chr12	123233269	123233269	+	28.3071	NA	promoter-TSS (NM_022782)	promoter-TSS (NM_022782)	-28	NM_152269	91574	Hs.319128	NM_152269	ENSG00000130921	C12orf65	COXPD7|SPG55	chromosome 12 open reading frame 65	protein-coding
MEIS1_in_LV-MEIS1_peak_2521	chr19	2507272	2507272	+	28.3071	NA	Intergenic	MIRc|SINE|MIR	31147	NM_015675	4616	Hs.110571	NM_015675	ENSG00000099860	GADD45B	GADD45BETA|MYD118	growth arrest and DNA damage inducible beta	protein-coding
MEIS1_in_LV-MEIS1_peak_2199	chr16	75647802	75647802	+	28.3071	NA	promoter-TSS (NM_018975)	promoter-TSS (NM_018975)	65	NR_144545	54386	Hs.301419	NM_018975	ENSG00000166848	TERF2IP	DRIP5|RAP1	TERF2 interacting protein	protein-coding
MEIS1_in_LV-MEIS1_peak_2606	chr19	18504592	18504592	+	28.3071	NA	intron (NM_006532, intron 1 of 11)	L3|LINE|CR1	17535	NM_006532	8178	Hs.515260	NM_006532	ENSG00000105656	ELL	C19orf17|ELL1|MEN|PPP1R68	elongation factor for RNA polymerase II	protein-coding
MEIS1_in_LV-MEIS1_peak_147	chr1	71461637	71461637	+	28.3071	NA	intron (NM_173808, intron 6 of 6)	intron (NM_173808, intron 6 of 6)	375375	NR_046218	100852409	Hs.681780	NR_046218	ENSG00000228853	NEGR1-IT1	-	NEGR1 intronic transcript 1	ncRNA
MEIS1_in_LV-MEIS1_peak_5536	chr8	80549782	80549782	+	28.3071	NA	Intergenic	Intergenic	63569	NM_001105539	65986	Hs.591868	NM_023929	ENSG00000205189	ZBTB10	RINZF	zinc finger and BTB domain containing 10	protein-coding
MEIS1_in_LV-MEIS1_peak_3288	chr21	42571303	42571303	+	28.3071	NA	intron (NM_001320537, intron 17 of 19)	intron (NM_001320537, intron 17 of 19)	43792	NR_131192	101928233	Hs.534827	NR_131192	ENSG00000225431	LINC01671	-	long intergenic non-protein coding RNA 1671	ncRNA
MEIS1_in_LV-MEIS1_peak_1031	chr11	83007230	83007230	+	28.3071	NA	intron (NM_001286060, intron 1 of 4)	intron (NM_001286060, intron 1 of 4)	27339	NM_001286059	27314	Hs.40758	NM_014488	ENSG00000137502	RAB30	-	RAB30, member RAS oncogene family	protein-coding
MEIS1_in_LV-MEIS1_peak_3130	chr2	237502696	237502696	+	28.3071	NA	intron (NM_001281474, intron 3 of 13)	intron (NM_001281474, intron 3 of 13)	-8235	NR_106869	102465486		NR_106869	ENSG00000277842	MIR6811	hsa-mir-6811	microRNA 6811	ncRNA
MEIS1_in_LV-MEIS1_peak_694	chr10	10313707	10313707	+	28.3056	NA	Intergenic	L2c|LINE|L2	148642	NR_120637	101928322	Hs.576789	NR_120637	ENSG00000270111	LOC101928322	-	uncharacterized LOC101928322	ncRNA
MEIS1_in_LV-MEIS1_peak_4863	chr6	142375456	142375456	+	28.2325	NA	intron (NM_001032394, intron 4 of 24)	intron (NM_001032394, intron 4 of 24)	73537	NM_001032394	57211	Hs.743302	NM_020455	ENSG00000112414	ADGRG6	APG1|DREG|GPR126|LCCS9|PR126|PS1TP2|VIGR	adhesion G protein-coupled receptor G6	protein-coding
MEIS1_in_LV-MEIS1_peak_5871	chr9	136052261	136052261	+	28.2325	NA	intron (NM_144653, intron 1 of 5)	intron (NM_144653, intron 1 of 5)	43024	NM_144653	138151	Hs.112895	NM_144653	ENSG00000148411	NACC2	BEND9|BTBD14|BTBD14A|BTBD31|NAC-2|RBB	NACC family member 2	protein-coding
MEIS1_in_LV-MEIS1_peak_4682	chr6	48894025	48894025	+	28.2204	NA	Intergenic	Intergenic	569303	NM_000255	4594	Hs.485527	NM_000255	ENSG00000146085	MUT	MCM	methylmalonyl-CoA mutase	protein-coding
MEIS1_in_LV-MEIS1_peak_787	chr10	75295017	75295017	+	28.2074	NA	intron (NR_120651, intron 1 of 3)	CpG	-1366	NR_038223	253264	Hs.662111	NR_038223	ENSG00000226051	ZNF503-AS1	-	ZNF503 antisense RNA 1	ncRNA
MEIS1_in_LV-MEIS1_peak_4385	chr5	96157826	96157826	+	28.2074	NA	intron (NR_130776, intron 1 of 4)	intron (NR_130776, intron 1 of 4)	78688	NR_030309	693168		NR_030309	ENSG00000207578	MIR583	MIRN583|hsa-mir-583	microRNA 583	ncRNA
MEIS1_in_LV-MEIS1_peak_370	chr1	162192232	162192232	+	28.2074	NA	intron (NM_014697, intron 2 of 9)	MER5A|DNA|hAT-Charlie	35125	NR_039798	100616386		NR_039798	ENSG00000266144	MIR4654	mir-4654	microRNA 4654	ncRNA
MEIS1_in_LV-MEIS1_peak_3502	chr3	77191870	77191870	+	28.2074	NA	intron (NM_001128929, intron 1 of 24)	intron (NM_001128929, intron 1 of 24)	93858	NM_001128929	6092	Hs.13305	NM_002942	ENSG00000185008	ROBO2	SAX3	roundabout guidance receptor 2	protein-coding
MEIS1_in_LV-MEIS1_peak_5654	chr9	2466890	2466890	+	28.1625	NA	Intergenic	Intergenic	-154884	NM_001322225	7436	Hs.370422	NM_003383	ENSG00000147852	VLDLR	CAMRQ1|CARMQ1|CHRMQ1|VLDL-R|VLDLRCH	very low density lipoprotein receptor	protein-coding
MEIS1_in_LV-MEIS1_peak_3246	chr21	19864638	19864638	+	28.1625	NA	Intergenic	Intergenic	938470	NR_109786	387486	Hs.576551	NR_024090	ENSG00000224924	LINC00320	C21orf131|NCRNA00320|PRED14	long intergenic non-protein coding RNA 320	ncRNA
MEIS1_in_LV-MEIS1_peak_4023	chr4	96784746	96784746	+	28.1625	NA	Intergenic	Intergenic	-582180	NR_102713	101410545	Hs.628520	NR_102713	ENSG00000251620	STPG2-AS1	-	STPG2 antisense RNA 1	ncRNA
MEIS1_in_LV-MEIS1_peak_4999	chr7	23334833	23334833	+	28.1625	NA	intron (NM_006547, intron 10 of 14)	intron (NM_006547, intron 10 of 14)	35512	NM_138446	115416	Hs.87385	NM_138446	ENSG00000156928	MALSU1	C7orf30|mtRsfA	mitochondrial assembly of ribosomal large subunit 1	protein-coding
MEIS1_in_LV-MEIS1_peak_197	chr1	100486138	100486138	+	28.1625	NA	TTS (NM_033313)	TTS (NM_033313)	-52034	NM_022049	54112	Hs.170053	NM_022049	ENSG00000181656	GPR88	COCPMR|STRG	G protein-coupled receptor 88	protein-coding
MEIS1_in_LV-MEIS1_peak_2624	chr19	21110390	21110390	+	28.1625	NA	intron (NR_117086, intron 5 of 6)	L1PA10|LINE|L1	28243	NR_117088	148206	Hs.729186	NM_182515	ENSG00000160352	ZNF714	-	zinc finger protein 714	protein-coding
MEIS1_in_LV-MEIS1_peak_1965	chr14	99571745	99571745	+	28.1625	NA	intron (NM_001144995, intron 1 of 5)	intron (NM_001144995, intron 1 of 5)	32645	NM_001144995	317762	Hs.709288	NM_001144995	ENSG00000205476	CCDC85C	-	coiled-coil domain containing 85C	protein-coding
MEIS1_in_LV-MEIS1_peak_5362	chr7	137331609	137331609	+	28.1625	NA	intron (NM_001321387, intron 1 of 4)	intron (NM_001321387, intron 1 of 4)	12381	NM_002825	5764	Hs.371249	NM_002825	ENSG00000105894	PTN	HARP|HB-GAM|HBBM|HBGF-8|HBGF8|HBNF|HBNF-1|NEGF1|OSF-1	pleiotrophin	protein-coding
MEIS1_in_LV-MEIS1_peak_123	chr1	51518167	51518167	+	28.0378	NA	intron (NM_001981, intron 1 of 24)	intron (NM_001981, intron 1 of 24)	1156	NM_001981	2060	Hs.83722	NM_001981	ENSG00000085832	EPS15	AF-1P|AF1P|MLLT5	epidermal growth factor receptor pathway substrate 15	protein-coding
MEIS1_in_LV-MEIS1_peak_3037	chr2	195308195	195308195	+	28.026	NA	Intergenic	LTR22B1|LTR|ERVK	-348613	NM_001127257	57181	Hs.650158	NM_020342	ENSG00000196950	SLC39A10	LZT-Hs2	solute carrier family 39 member 10	protein-coding
MEIS1_in_LV-MEIS1_peak_5058	chr7	46508583	46508583	+	28.026	NA	Intergenic	MER34B|LTR|ERV1	188539	NR_134575	730338	Hs.640207	NR_134575	ENSG00000233539	LOC730338	-	uncharacterized LOC730338	ncRNA
MEIS1_in_LV-MEIS1_peak_2598	chr19	15452313	15452313	+	27.9928	NA	intron (NM_022904, intron 16 of 17)	intron (NM_022904, intron 16 of 17)	-2362	NM_021241	58525	Hs.442138	NM_021241	ENSG00000011451	WIZ	ZNF803	widely interspaced zinc finger motifs	protein-coding
MEIS1_in_LV-MEIS1_peak_5390	chr7	150355392	150355392	+	27.9674	NA	Intergenic	MER57B2|LTR|ERV1	-13398	NM_013400	29803	Hs.647086	NM_013400	ENSG00000214022	REPIN1	AP4|RIP60|ZNF464|Zfp464	replication initiator 1	protein-coding
MEIS1_in_LV-MEIS1_peak_5506	chr8	68935273	68935273	+	27.8263	NA	intron (NR_039986, intron 3 of 4)	intron (NR_039986, intron 3 of 4)	168917	NR_039986	100505718	Hs.122386	NR_039986	ENSG00000253658	LINC01592	-	long intergenic non-protein coding RNA 1592	ncRNA
MEIS1_in_LV-MEIS1_peak_914	chr11	27055304	27055304	+	27.7811	NA	intron (NR_125768, intron 3 of 3)	intron (NR_125768, intron 3 of 3)	14342	NM_003986	8424	Hs.591996	NM_003986	ENSG00000129151	BBOX1	BBH|BBOX|G-BBH|gamma-BBH	gamma-butyrobetaine hydroxylase 1	protein-coding
MEIS1_in_LV-MEIS1_peak_2541	chr19	7266131	7266131	+	27.7811	NA	intron (NM_001079817, intron 2 of 20)	L1ME4a|LINE|L1	28171	NM_001079817	3643	Hs.465744	NM_000208	ENSG00000171105	INSR	CD220|HHF5	insulin receptor	protein-coding
MEIS1_in_LV-MEIS1_peak_2575	chr19	11925015	11925015	+	27.7459	NA	promoter-TSS (NM_001271848)	promoter-TSS (NM_001271848)	-53	NM_001271848	90592	Hs.528486	NM_144566	ENSG00000196757	ZNF700	-	zinc finger protein 700	protein-coding
MEIS1_in_LV-MEIS1_peak_1954	chr14	91109435	91109435	+	27.7459	NA	Intergenic	Intergenic	-4578	NM_001102369	80017	Hs.309849	NM_024952	ENSG00000133943	DGLUCY	C14orf159	D-glutamate cyclase	protein-coding
MEIS1_in_LV-MEIS1_peak_5493	chr8	58959382	58959382	+	27.7459	NA	intron (NM_014729, intron 2 of 8)	intron (NM_014729, intron 2 of 8)	159826	NM_014729	9760	Hs.491805	NM_014729	ENSG00000198846	TOX	TOX1	thymocyte selection associated high mobility group box	protein-coding
MEIS1_in_LV-MEIS1_peak_2064	chr15	70093770	70093770	+	27.7459	NA	intron (NM_001105192, intron 4 of 19)	intron (NM_001105192, intron 4 of 19)	1015	NM_001282982	7090	Hs.287362	NM_005078	ENSG00000140332	TLE3	ESG|ESG3|GRG3|HsT18976	transducin like enhancer of split 3	protein-coding
MEIS1_in_LV-MEIS1_peak_709	chr10	23869704	23869704	+	27.7459	NA	intron (NM_001098500, intron 1 of 18)	Chap1_Mam|DNA|hAT-Charlie	174958	NM_001098500	56243	Hs.445885	NM_019590	ENSG00000120549	KIAA1217	ETL4|SKT	KIAA1217	protein-coding
MEIS1_in_LV-MEIS1_peak_3550	chr3	96112131	96112131	+	27.7118	NA	Intergenic	L1MB8|LINE|L1	-247833	NR_107027	102465864		NR_107027	ENSG00000278103	MIR8060	hsa-mir-8060	microRNA 8060	ncRNA
MEIS1_in_LV-MEIS1_peak_4052	chr4	105633465	105633465	+	27.648	NA	intron (NM_001242729, intron 4 of 13)	intron (NM_001242729, intron 4 of 13)	71874	NR_046840	100874374	Hs.668908	NR_046840	ENSG00000249885	ARHGEF38-IT1	-	ARHGEF38 intronic transcript 1	ncRNA
MEIS1_in_LV-MEIS1_peak_4113	chr4	132811278	132811278	+	27.64	NA	Intergenic	Intergenic	220189	NR_126401	104355285	Hs.123483	NR_126401	ENSG00000251398	LINC01256	TCONS_l2_00021715	long intergenic non-protein coding RNA 1256	ncRNA
MEIS1_in_LV-MEIS1_peak_5186	chr7	90768459	90768459	+	27.6378	NA	intron (NM_012395, intron 3 of 13)	intron (NM_012395, intron 3 of 13)	58643	NM_001287136	5218	Hs.258576	NM_012395	ENSG00000058091	CDK14	PFTAIRE1|PFTK1	cyclin dependent kinase 14	protein-coding
MEIS1_in_LV-MEIS1_peak_1347	chr12	60710366	60710366	+	27.5549	NA	Intergenic	L1M3de|LINE|L1	1021029	NR_073056	9194	Hs.88156	NM_004731	ENSG00000118596	SLC16A7	MCT2	solute carrier family 16 member 7	protein-coding
MEIS1_in_LV-MEIS1_peak_1264	chr12	48021850	48021850	+	27.5297	NA	Intergenic	Intergenic	-17348	NM_033150	1280	Hs.408182	NM_001844	ENSG00000139219	COL2A1	ANFH|AOM|COL11A3|SEDC|STL1	collagen type II alpha 1 chain	protein-coding
MEIS1_in_LV-MEIS1_peak_1263	chr12	47905014	47905014	+	27.4702	NA	promoter-TSS (NM_000376)	promoter-TSS (NM_000376)	17	NM_000376	7421	Hs.524368	NM_000376	ENSG00000111424	VDR	NR1I1|PPP1R163	vitamin D receptor	protein-coding
MEIS1_in_LV-MEIS1_peak_1442	chr12	86727257	86727257	+	27.4303	NA	intron (NM_013244, intron 1 of 6)	intron (NM_013244, intron 1 of 6)	111647	NM_013244	25834	Hs.589093	NM_013244	ENSG00000182050	MGAT4C	GNTIVH|HGNT-IV-H	MGAT4 family member C	protein-coding
MEIS1_in_LV-MEIS1_peak_1465	chr12	93814170	93814170	+	27.3672	NA	intron (NM_001320100, intron 2 of 2)	intron (NM_001320100, intron 2 of 2)	-76347	NR_110092	101928731	Hs.659971	NR_110092	ENSG00000258274	LOC101928731	-	uncharacterized LOC101928731	ncRNA
MEIS1_in_LV-MEIS1_peak_326	chr1	153990656	153990656	+	27.312	NA	promoter-TSS (NM_001030)	promoter-TSS (NM_001030)	-107	NM_001030	6232	Hs.546291	NM_001030	ENSG00000177954	RPS27	DBA17|MPS-1|MPS1|S27	ribosomal protein S27	protein-coding
MEIS1_in_LV-MEIS1_peak_2885	chr2	78034618	78034618	+	27.2828	NA	intron (NR_110288, intron 1 of 3)	intron (NR_110288, intron 1 of 3)	-54112	NR_110287	101927948	Hs.639404	NR_110287	ENSG00000229494	LOC101927948	-	uncharacterized LOC101927948	ncRNA
MEIS1_in_LV-MEIS1_peak_3620	chr3	120802376	120802376	+	27.2828	NA	Intergenic	L3|LINE|CR1	33981	NR_135571	101926983	Hs.553055	NR_135570	ENSG00000243593	LINC02049	-	long intergenic non-protein coding RNA 2049	ncRNA
MEIS1_in_LV-MEIS1_peak_5804	chr9	108131202	108131202	+	27.2828	NA	Intergenic	Intergenic	-641482	NM_001314052	9314	Hs.376206	NM_004235	ENSG00000136826	KLF4	EZF|GKLF	Kruppel like factor 4	protein-coding
MEIS1_in_LV-MEIS1_peak_390	chr1	169367918	169367918	+	27.2785	NA	promoter-TSS (NR_104229)	promoter-TSS (NR_104229)	39	NM_001320973	8548	Hs.130746	NM_003666	ENSG00000117475	BLZF1	GOLGIN-45|JEM-1|JEM-1s|JEM1	basic leucine zipper nuclear factor 1	protein-coding
MEIS1_in_LV-MEIS1_peak_3755	chr3	171447497	171447497	+	27.2527	NA	intron (NM_001161560, intron 1 of 31)	intron (NM_001161560, intron 1 of 31)	12911	NM_001161560	23043	Hs.34024	NM_015028	ENSG00000154310	TNIK	MRT54	TRAF2 and NCK interacting kinase	protein-coding
MEIS1_in_LV-MEIS1_peak_2069	chr15	70310151	70310151	+	27.1982	NA	Intergenic	Intergenic	-212234	NM_001105192	7090	Hs.287362	NM_005078	ENSG00000140332	TLE3	ESG|ESG3|GRG3|HsT18976	transducin like enhancer of split 3	protein-coding
MEIS1_in_LV-MEIS1_peak_998	chr11	66189388	66189388	+	27.1982	NA	intron (NM_018026, intron 1 of 23)	intron (NM_018026, intron 1 of 23)	-67906	NM_001134775	64837	Hs.280792	NM_022822	ENSG00000174996	KLC2	-	kinesin light chain 2	protein-coding
MEIS1_in_LV-MEIS1_peak_878	chr11	4094736	4094736	+	27.1982	NA	promoter-TSS (NM_001318064)	promoter-TSS (NM_001318064)	51	NM_001318064	6240	Hs.445705	NM_001033	ENSG00000167325	RRM1	R1|RIR1|RR1	ribonucleotide reductase catalytic subunit M1	protein-coding
MEIS1_in_LV-MEIS1_peak_2956	chr2	139692796	139692796	+	27.1982	NA	Intergenic	L2b|LINE|L2	795472	NR_033658	647012	Hs.639411	NR_033658		YY1P2	-	YY1 transcription factor pseudogene 2	pseudo
MEIS1_in_LV-MEIS1_peak_3279	chr21	40658447	40658447	+	27.1982	NA	intron (NM_001389, intron 3 of 32)	intron (NM_001389, intron 3 of 32)	-27680	NR_046774	100874326	Hs.679746	NR_046774	ENSG00000233756	DSCAM-IT1	zag4	DSCAM intronic transcript 1	ncRNA
MEIS1_in_LV-MEIS1_peak_1811	chr14	25659270	25659270	+	27.1982	NA	Intergenic	LTR80B|LTR|ERVL	-608973	NM_001304476	29091	Hs.508958	NM_014178	ENSG00000168952	STXBP6	HSPC156|amisyn	syntaxin binding protein 6	protein-coding
MEIS1_in_LV-MEIS1_peak_2054	chr15	67915735	67915735	+	27.1982	NA	Intergenic	Intergenic	-75690	NR_104080	101954271		NR_104080	ENSG00000207507	RNU6-9	U6-9	RNA, U6 small nuclear 9	snRNA
MEIS1_in_LV-MEIS1_peak_4140	chr4	140243454	140243454	+	27.1982	NA	Intergenic	Intergenic	-13832	NM_032547	60592	Hs.480815	NM_032547	ENSG00000153130	SCOC	HRIHFB2072|SCOCO|UNC-69	short coiled-coil protein	protein-coding
MEIS1_in_LV-MEIS1_peak_1640	chr13	45929121	45929121	+	27.1982	NA	Intergenic	MER20B|DNA|hAT-Charlie	-77410	NM_198849	283514	Hs.368483	NM_198849	ENSG00000215475	SIAH3	-	siah E3 ubiquitin protein ligase family member 3	protein-coding
MEIS1_in_LV-MEIS1_peak_41	chr1	19514821	19514821	+	27.1982	NA	Intergenic	Intergenic	-29180	NM_001313932	832	Hs.432760	NM_004930	ENSG00000077549	CAPZB	CAPB|CAPPB|CAPZ	capping actin protein of muscle Z-line subunit beta	protein-coding
MEIS1_in_LV-MEIS1_peak_2162	chr16	53503491	53503491	+	27.1982	NA	promoter-TSS (NM_001308325)	promoter-TSS (NM_001308325)	-187	NM_001012398	64400	Hs.380897	NM_022476	ENSG00000166971	AKTIP	FT1|FTS	AKT interacting protein	protein-coding
MEIS1_in_LV-MEIS1_peak_1730	chr13	87532053	87532053	+	27.1982	NA	intron (NR_033829, intron 1 of 5)	MIR|SINE|MIR	86687	NR_039722	100616182		NR_039722	ENSG00000266052	MIR4500	-	microRNA 4500	ncRNA
MEIS1_in_LV-MEIS1_peak_5909	chrX	47151665	47151665	+	27.1982	NA	intron (NM_005676, intron 2 of 23)	MLT1J|LTR|ERVL-MaLR	6447	NM_152856	8241	Hs.401509	NM_005676	ENSG00000182872	RBM10	DXS8237E|GPATC9|GPATCH9|S1-1|TARPS|ZRANB5	RNA binding motif protein 10	protein-coding
MEIS1_in_LV-MEIS1_peak_5826	chr9	115525608	115525608	+	27.1982	NA	Intergenic	Intergenic	218631	NR_109805	101928775	Hs.522362	NR_109805	ENSG00000228714	LOC101928775	-	uncharacterized LOC101928775	ncRNA
MEIS1_in_LV-MEIS1_peak_2093	chr16	2830088	2830088	+	27.1982	NA	promoter-TSS (NM_145252)	promoter-TSS (NM_145252)	-84	NM_145252	124220	Hs.105887	NM_145252	ENSG00000162078	ZG16B	EECP|HRPE773|JCLN2|PAUF|PRO1567	zymogen granule protein 16B	protein-coding
MEIS1_in_LV-MEIS1_peak_5936	chrX	97294235	97294235	+	27.1982	NA	intron (NM_006729, intron 23 of 26)	intron (NM_006729, intron 23 of 26)	270300	NR_125391	10824	Hs.654372	NR_125391	ENSG00000236256	DIAPH2-AS1	EPAG	DIAPH2 antisense RNA 1	ncRNA
MEIS1_in_LV-MEIS1_peak_1957	chr14	92348316	92348316	+	27.1982	NA	intron (NM_153646, intron 2 of 16)	MIRb|SINE|MIR	24508	NM_153646	123041	Hs.385530	NM_153646	ENSG00000140090	SLC24A4	AI2A5|NCKX4|SHEP6|SLC24A2	solute carrier family 24 member 4	protein-coding
MEIS1_in_LV-MEIS1_peak_934	chr11	35061678	35061678	+	27.1982	NA	Intergenic	L1ME3|LINE|L1	76354	NR_120528	100507144	Hs.673491	NR_120528	ENSG00000255521	LOC100507144	-	uncharacterized LOC100507144	ncRNA
MEIS1_in_LV-MEIS1_peak_4770	chr6	98871401	98871401	+	27.1982	NA	Intergenic	Cheshire|DNA|hAT-Charlie	36697	NM_005604	5454	Hs.182505	NM_005604	ENSG00000184486	POU3F2	BRN2|N-Oct3|OCT7|OTF-7|OTF7|POUF3|brn-2|oct-7	POU class 3 homeobox 2	protein-coding
MEIS1_in_LV-MEIS1_peak_802	chr10	76303132	76303132	+	27.1404	NA	intron (NR_131178, intron 6 of 7)	intron (NR_131178, intron 6 of 7)	520371	NM_032024	83938	Hs.118161	NM_032024	ENSG00000148655	LRMDA	C10orf11|CDA017	leucine rich melanocyte differentiation associated	protein-coding
MEIS1_in_LV-MEIS1_peak_3841	chr3	194213027	194213027	+	27.1404	NA	intron (NR_125403, intron 1 of 2)	intron (NR_125403, intron 1 of 2)	-6720	NR_125404	100505920	Hs.436654	NR_125403	ENSG00000225742	LINC02036	-	long intergenic non-protein coding RNA 2036	ncRNA
MEIS1_in_LV-MEIS1_peak_3434	chr3	39142004	39142004	+	27.1404	NA	3' UTR (NM_033027, exon 5 of 5)	3' UTR (NM_033027, exon 5 of 5)	3798	NR_106880	102466743		NR_106880	ENSG00000284158	MIR6822	hsa-mir-6822	microRNA 6822	ncRNA
MEIS1_in_LV-MEIS1_peak_5751	chr9	73869518	73869518	+	27.1404	NA	Intergenic	Intergenic	-502013	NR_121182	101927358	Hs.559523	NR_121182	ENSG00000227809	LOC101927358	-	uncharacterized LOC101927358	ncRNA
MEIS1_in_LV-MEIS1_peak_4162	chr4	148164677	148164677	+	27.1404	NA	intron (NM_000901, intron 4 of 8)	intron (NM_000901, intron 4 of 8)	277843	NM_001166104	4306	Hs.163924	NM_000901	ENSG00000151623	NR3C2	MCR|MLR|MR|NR3C2VIT	nuclear receptor subfamily 3 group C member 2	protein-coding
MEIS1_in_LV-MEIS1_peak_2363	chr17	67991109	67991109	+	27.1404	NA	TTS (NM_181655)	TTS (NM_181655)	2540	NM_181656	284018	Hs.90790	NM_181655	ENSG00000186665	C17orf58	-	chromosome 17 open reading frame 58	protein-coding
MEIS1_in_LV-MEIS1_peak_3124	chr2	233290214	233290214	+	27.1404	NA	intron (NM_198890, intron 9 of 13)	intron (NM_198890, intron 9 of 13)	1538	NR_003006	677772	Hs.689637	NR_003006	ENSG00000251791	SCARNA6	U88	small Cajal body-specific RNA 6	ncRNA
MEIS1_in_LV-MEIS1_peak_3707	chr3	155854728	155854728	+	27.1404	NA	promoter-TSS (NM_001190992)	promoter-TSS (NM_001190992)	-269	NM_004733	9197	Hs.478031	NM_004733	ENSG00000169359	SLC33A1	ACATN|AT-1|AT1|CCHLND|SPG42	solute carrier family 33 member 1	protein-coding
MEIS1_in_LV-MEIS1_peak_5779	chr9	90555592	90555592	+	27.1404	NA	intron (NR_034157, intron 1 of 5)	L1ME4b|LINE|L1	27154	NR_034157	340515	Hs.522284	NM_001105317		LINC01501	-	long intergenic non-protein coding RNA 1501	ncRNA
MEIS1_in_LV-MEIS1_peak_468	chr1	192496519	192496519	+	27.0845	NA	Intergenic	L1M5|LINE|L1	-79208	NM_002922	5996	Hs.75256	NM_002922	ENSG00000090104	RGS1	1R20|BL34|HEL-S-87|IER1|IR20	regulator of G protein signaling 1	protein-coding
MEIS1_in_LV-MEIS1_peak_244	chr1	143720238	143720238	+	27.0645	NA	Intergenic	LTR4|LTR|ERV1	9332	NR_004400	26863		NR_004400	ENSG00000206737	RNVU1-18	RNU1-25|RNU1-25P|RNU1-5|RNU1P1|RNU1P9|U1.15|U1P101|U1P15|vU1.18	RNA, variant U1 small nuclear 18	snRNA
MEIS1_in_LV-MEIS1_peak_4014	chr4	94476112	94476112	+	27.0064	NA	intron (NM_001256428, intron 2 of 11)	intron (NM_001256428, intron 2 of 11)	24255	NR_046186	10611	Hs.480311	NM_006457	ENSG00000163110	PDLIM5	ENH|ENH1|L9|LIM	PDZ and LIM domain 5	protein-coding
MEIS1_in_LV-MEIS1_peak_4740	chr6	80736417	80736417	+	26.9802	NA	Intergenic	Intergenic	629807	NM_183050	594	Hs.156414	NM_000056	ENSG00000083123	BCKDHB	BCKDE1B|BCKDH E1-beta|E1B	branched chain keto acid dehydrogenase E1 subunit beta	protein-coding
MEIS1_in_LV-MEIS1_peak_4861	chr6	142285855	142285855	+	26.9075	NA	Intergenic	Intergenic	-16064	NM_020455	57211	Hs.743302	NM_020455	ENSG00000112414	ADGRG6	APG1|DREG|GPR126|LCCS9|PR126|PS1TP2|VIGR	adhesion G protein-coupled receptor G6	protein-coding
MEIS1_in_LV-MEIS1_peak_3500	chr3	74900498	74900498	+	26.8985	NA	Intergenic	LTR12C|LTR|ERV1	-313978	NR_039646	100616394		NR_039646	ENSG00000284252	MIR4444-1	MIR4444|hsa-mir-4444-1	microRNA 4444-1	ncRNA
MEIS1_in_LV-MEIS1_peak_293	chr1	149861141	149861141	+	26.8758	NA	promoter-TSS (NM_003548).2	promoter-TSS (NM_003548).2	18	NM_003548	8370	Hs.55468	NM_003548	ENSG00000270882	HIST2H4A	FO108|H4|H4/n|H4F2|H4FN|HIST2H4	histone cluster 2 H4 family member a	protein-coding
MEIS1_in_LV-MEIS1_peak_1680	chr13	62722000	62722000	+	26.8317	NA	intron (NR_047029, intron 5 of 7)	MLT1E|LTR|ERVL-MaLR	74692	NR_120404	100874176	Hs.402083	NR_047029		LINC00448	-	long intergenic non-protein coding RNA 448	ncRNA
MEIS1_in_LV-MEIS1_peak_1214	chr12	25195247	25195247	+	26.7947	NA	promoter-TSS (NM_001082972)	promoter-TSS (NM_001082972)	31	NM_001001660	144363	Hs.209151	NM_001001660	ENSG00000205707	ETFRF1	LYRM5	electron transfer flavoprotein regulatory factor 1	protein-coding
MEIS1_in_LV-MEIS1_peak_2734	chr19	55461875	55461875	+	26.7816	NA	promoter-TSS (NM_001136201)	promoter-TSS (NM_001136201)	-193	NM_001136201	79763	Hs.467306	NM_024710	ENSG00000063241	ISOC2	-	isochorismatase domain containing 2	protein-coding
MEIS1_in_LV-MEIS1_peak_539	chr1	207791497	207791497	+	26.7719	NA	intron (NM_002389, intron 13 of 13)	MER44B|DNA|TcMar-Tigger	10442	NR_029832	407026		NR_029832	ENSG00000284214	MIR29C	MIRN29C|miRNA29C|mir-29c	microRNA 29c	ncRNA
MEIS1_in_LV-MEIS1_peak_2207	chr16	79600886	79600886	+	26.7019	NA	promoter-TSS (NM_005360)	promoter-TSS (NM_005360)	-161	NM_001031804	4094	Hs.134859	NM_005360	ENSG00000178573	MAF	AYGRP|CCA4|CTRCT21|c-MAF	MAF bZIP transcription factor	protein-coding
MEIS1_in_LV-MEIS1_peak_478	chr1	193494684	193494684	+	26.6566	NA	Intergenic	Intergenic	189939	NR_125789	101929184	Hs.146728	NR_125789	ENSG00000232077	LINC01031	TCONS_00000361	long intergenic non-protein coding RNA 1031	ncRNA
MEIS1_in_LV-MEIS1_peak_1836	chr14	37436676	37436676	+	26.6524	NA	intron (NM_001195296, intron 13 of 14)	intron (NM_001195296, intron 13 of 14)	158444	NM_004496	3169	Hs.163484	NM_004496	ENSG00000129514	FOXA1	HNF3A|TCF3A	forkhead box A1	protein-coding
MEIS1_in_LV-MEIS1_peak_1560	chr12	120302255	120302255	+	26.6524	NA	promoter-TSS (NM_012240)	promoter-TSS (NM_012240)	-66	NM_012240	23409	Hs.50861	NM_012240	ENSG00000089163	SIRT4	SIR2L4	sirtuin 4	protein-coding
MEIS1_in_LV-MEIS1_peak_3820	chr3	188057257	188057257	+	26.6524	NA	Intergenic	Intergenic	-80850	NR_135538	105374266	Hs.570518	NR_135537		LINC01991	-	long intergenic non-protein coding RNA 1991	ncRNA
MEIS1_in_LV-MEIS1_peak_1295	chr12	53006224	53006224	+	26.65	NA	promoter-TSS (NM_001300821)	promoter-TSS (NM_001300821)	-34	NM_001417	1975	Hs.648394	NM_001417	ENSG00000063046	EIF4B	EIF-4B|PRO1843	eukaryotic translation initiation factor 4B	protein-coding
MEIS1_in_LV-MEIS1_peak_5469	chr8	40054819	40054819	+	26.65	NA	Intergenic	Intergenic	-98649	NM_020130	56892	Hs.591849	NM_020130	ENSG00000176907	TCIM	C8orf4|TC-1|TC1	transcriptional and immune response regulator	protein-coding
MEIS1_in_LV-MEIS1_peak_2858	chr2	64750966	64750966	+	26.65	NA	Intergenic	Intergenic	-97054	NM_014755	9792	Hs.591569	NM_014755	ENSG00000179833	SERTAD2	Sei-2|TRIP-Br2|TRIPBR2	SERTA domain containing 2	protein-coding
MEIS1_in_LV-MEIS1_peak_2572	chr19	11798469	11798469	+	26.65	NA	promoter-TSS (NM_152356)	promoter-TSS (NM_152356)	-107	NM_152356	126069	Hs.631634	NM_152356	ENSG00000177599	ZNF491	-	zinc finger protein 491	protein-coding
MEIS1_in_LV-MEIS1_peak_5809	chr9	109213504	109213504	+	26.65	NA	intron (NM_019114, intron 17 of 25)	intron (NM_019114, intron 17 of 25)	-46213	NM_014334	23732	Hs.347537	NM_014334	ENSG00000260230	FRRS1L	C9orf4|CG-6|CG6|EIEE37	ferric chelate reductase 1 like	protein-coding
MEIS1_in_LV-MEIS1_peak_5043	chr7	43240680	43240680	+	26.65	NA	intron (NM_015052, intron 2 of 29)	intron (NM_015052, intron 2 of 29)	89785	NR_037508	100500829		NR_037508	ENSG00000264069	MIR3943	-	microRNA 3943	ncRNA
MEIS1_in_LV-MEIS1_peak_2032	chr15	59657619	59657619	+	26.65	NA	promoter-TSS (NM_001320929)	promoter-TSS (NM_001320929)	-78	NM_001320930	2958	Hs.512934	NM_004492	ENSG00000140307	GTF2A2	HsT18745|T18745|TF2A2|TFIIA|TFIIA-12|TFIIA-gamma|TFIIAS	general transcription factor IIA subunit 2	protein-coding
MEIS1_in_LV-MEIS1_peak_140	chr1	66316556	66316556	+	26.65	NA	intron (NM_001037340, intron 5 of 14)	intron (NM_001037340, intron 5 of 14)	-15552	NM_001037339	5142	Hs.198072	NM_002600	ENSG00000184588	PDE4B	DPDE4|PDEIVB	phosphodiesterase 4B	protein-coding
MEIS1_in_LV-MEIS1_peak_666	chr1	247126311	247126311	+	26.65	NA	intron (NM_001243740, intron 3 of 3)	intron (NM_001243740, intron 3 of 3)	-13894	NM_207401	388759	Hs.456511	NM_207401		C1orf229	-	chromosome 1 open reading frame 229	protein-coding
MEIS1_in_LV-MEIS1_peak_888	chr11	10048661	10048661	+	26.5908	NA	intron (NM_030962, intron 2 of 39)	Charlie1a|DNA|hAT-Charlie	209519	NR_120539	101928008	Hs.585524	NR_120539	ENSG00000255476	LOC101928008	-	uncharacterized LOC101928008	ncRNA
MEIS1_in_LV-MEIS1_peak_1329	chr12	56636965	56636965	+	26.5908	NA	promoter-TSS (NM_013449)	promoter-TSS (NM_013449)	-586	NM_013449	11176	Hs.314263	NM_013449	ENSG00000076108	BAZ2A	TIP5|WALp3	bromodomain adjacent to zinc finger domain 2A	protein-coding
MEIS1_in_LV-MEIS1_peak_646	chr1	237756749	237756749	+	26.5717	NA	intron (NM_001035, intron 81 of 104)	MER58B|DNA|hAT-Charlie	-105426	NR_027247	100130331	Hs.661736	NR_027247	ENSG00000237250	LOC100130331	-	POTE ankyrin domain family, member F pseudogene	pseudo
MEIS1_in_LV-MEIS1_peak_3835	chr3	190071238	190071238	+	26.5601	NA	intron (NM_001134418, intron 1 of 14)	intron (NM_001134418, intron 1 of 14)	-49726	NR_126419	101929152		NR_126419	ENSG00000225764	P3H2-AS1	LEPREL1-AS1	P3H2 antisense RNA 1	ncRNA
MEIS1_in_LV-MEIS1_peak_5949	chrX	120554366	120554366	+	26.4651	NA	intron (NM_001079872, intron 2 of 19)	intron (NM_001079872, intron 2 of 19)	6596	NM_001079872	8450	Hs.102914	NM_003588	ENSG00000158290	CUL4B	CUL-4B|MRXHF2|MRXS15|MRXSC|SFM2	cullin 4B	protein-coding
MEIS1_in_LV-MEIS1_peak_3521	chr3	82217366	82217366	+	26.4493	NA	Intergenic	Intergenic	-455567	NM_000158	2632	Hs.436062	NM_000158	ENSG00000114480	GBE1	APBD|GBE|GSD4	1,4-alpha-glucan branching enzyme 1	protein-coding
MEIS1_in_LV-MEIS1_peak_4429	chr5	117300187	117300187	+	26.3828	NA	Intergenic	Intergenic	-115325	NR_046089	728342	Hs.434420	NR_046089		LINC00992	-	long intergenic non-protein coding RNA 992	ncRNA
MEIS1_in_LV-MEIS1_peak_3617	chr3	119677412	119677412	+	26.3709	NA	promoter-TSS (NM_005694)	promoter-TSS (NM_005694)	-16	NM_005694	10063	Hs.534383	NM_005694	ENSG00000138495	COX17	-	COX17, cytochrome c oxidase copper chaperone	protein-coding
MEIS1_in_LV-MEIS1_peak_3544	chr3	89530186	89530186	+	26.3709	NA	Intergenic	Intergenic	422662	NM_005233	2042	Hs.123642	NM_005233	ENSG00000044524	EPHA3	EK4|ETK|ETK1|HEK|HEK4|TYRO4	EPH receptor A3	protein-coding
MEIS1_in_LV-MEIS1_peak_3528	chr3	86251973	86251973	+	26.3242	NA	Intergenic	L2c|LINE|L2	-229970	NR_135563	101927494	Hs.385622	NR_135563	ENSG00000241328	LINC02070	-	long intergenic non-protein coding RNA 2070	ncRNA
MEIS1_in_LV-MEIS1_peak_2891	chr2	83069862	83069862	+	26.285	NA	Intergenic	Intergenic	213059	NR_033423	1720	Hs.169235	NR_033423		DHFRP3	-	dihydrofolate reductase pseudogene 3	pseudo
MEIS1_in_LV-MEIS1_peak_1365	chr12	63862407	63862407	+	26.285	NA	intron (NM_020762, intron 1 of 21)	intron (NM_020762, intron 1 of 21)	17654	NM_020762	57522	Hs.210751	NM_020762	ENSG00000196935	SRGAP1	ARHGAP13|NMTC2	SLIT-ROBO Rho GTPase activating protein 1	protein-coding
MEIS1_in_LV-MEIS1_peak_471	chr1	192691114	192691114	+	26.2415	NA	Intergenic	Intergenic	-25214	NR_039624	100616345		NR_039624	ENSG00000283795	MIR4426	-	microRNA 4426	ncRNA
MEIS1_in_LV-MEIS1_peak_5012	chr7	26653755	26653755	+	26.2372	NA	Intergenic	Intergenic	14670	NM_001302625	285941	Hs.413394	NM_001145531		C7orf71	-	chromosome 7 open reading frame 71	protein-coding
MEIS1_in_LV-MEIS1_peak_1738	chr13	92104087	92104087	+	26.2017	NA	intron (NM_004466, intron 6 of 7)	L1M4|LINE|L1	248120	NR_120382	100873970	Hs.567269	NR_120382		GPC5-AS2	-	GPC5 antisense RNA 2	ncRNA
MEIS1_in_LV-MEIS1_peak_2506	chr18	73189898	73189898	+	26.1252	NA	intron (NR_034133, intron 3 of 5)	MER110A|LTR|ERV1	74600	NR_034133	400655	Hs.579378	NR_034133	ENSG00000263711	LOC400655	-	uncharacterized LOC400655	ncRNA
MEIS1_in_LV-MEIS1_peak_2083	chr15	89129881	89129881	+	26.1165	NA	intron (NM_152924, intron 3 of 10)	intron (NM_152924, intron 3 of 10)	41731	NM_007011	11057	Hs.122337	NM_007011	ENSG00000140526	ABHD2	HS1-2|LABH2|PHPS1-2	abhydrolase domain containing 2	protein-coding
MEIS1_in_LV-MEIS1_peak_2369	chr17	70855716	70855716	+	26.1165	NA	Intergenic	Intergenic	346463	NR_104152	101928165	Hs.407613	NR_104152	ENSG00000260785	CASC17	LINC00600	cancer susceptibility 17 (non-protein coding)	ncRNA
MEIS1_in_LV-MEIS1_peak_2208	chr16	80718566	80718566	+	26.1165	NA	intron (NM_152342, intron 1 of 6)	intron (NM_152342, intron 1 of 6)	85712	NM_152342	124359	Hs.60257	NM_152342	ENSG00000166446	CDYL2	PCCP1	chromodomain Y like 2	protein-coding
MEIS1_in_LV-MEIS1_peak_2708	chr19	49496295	49496295	+	26.1165	NA	promoter-TSS (NM_001015)	promoter-TSS (NM_001015)	-70	NM_001015	6205	Hs.433529	NM_001015	ENSG00000142534	RPS11	S11	ribosomal protein S11	protein-coding
MEIS1_in_LV-MEIS1_peak_3491	chr3	69200586	69200586	+	26.1011	NA	intron (NM_015123, intron 11 of 22)	intron (NM_015123, intron 11 of 22)	-77991	NM_198271	56203	Hs.350621	NM_198271	ENSG00000163380	LMOD3	NEM10	leiomodin 3	protein-coding
MEIS1_in_LV-MEIS1_peak_1823	chr14	33938472	33938472	+	26.1011	NA	intron (NM_001308103, intron 1 of 4)	intron (NM_001308103, intron 1 of 4)	12354	NM_001308103	112399	Hs.135507	NM_022073	ENSG00000129521	EGLN3	HIFP4H3|HIFPH3|PHD3	egl-9 family hypoxia inducible factor 3	protein-coding
MEIS1_in_LV-MEIS1_peak_5423	chr8	17321560	17321560	+	26.1011	NA	intron (NM_004686, intron 7 of 13)	intron (NM_004686, intron 7 of 13)	-74651	NM_001322093	29883	Hs.587465	NM_013354	ENSG00000198791	CNOT7	CAF-1|CAF1|Caf1a|hCAF-1	CCR4-NOT transcription complex subunit 7	protein-coding
MEIS1_in_LV-MEIS1_peak_2747	chr19_GL949746v1_alt	370534	370534	+	26.1011	NA	promoter-TSS (NM_001301782).2	promoter-TSS (NM_001301782).2	-309	NM_198988	94059	Hs.590976	NM_198988	ENSG00000275183	LENG9	-	leukocyte receptor cluster member 9	protein-coding
MEIS1_in_LV-MEIS1_peak_2267	chr17	19112380	19112380	+	26.1011	NA	TTS (NR_006882)	TTS (NR_006882)	256	NR_006882	780854		NR_006882	ENSG00000281000	SNORD3D	RNU3-4|U3-4	small nucleolar RNA, C/D box 3D	snoRNA
MEIS1_in_LV-MEIS1_peak_4679	chr6	47484181	47484181	+	26.1011	NA	intron (NM_012120, intron 1 of 17)	intron (NM_012120, intron 1 of 17)	6392	NM_012120	23607	Hs.485518	NM_012120	ENSG00000198087	CD2AP	CMS	CD2 associated protein	protein-coding
MEIS1_in_LV-MEIS1_peak_4841	chr6	136566991	136566991	+	26.1011	NA	intron (NM_005923, intron 26 of 29)	intron (NM_005923, intron 26 of 29)	-16172	NM_003980	9053	Hs.486548	NM_003980	ENSG00000135525	MAP7	E-MAP-115|EMAP115	microtubule associated protein 7	protein-coding
MEIS1_in_LV-MEIS1_peak_3423	chr3	31532518	31532518	+	26.1011	NA	promoter-TSS (NM_178862)	promoter-TSS (NM_178862)	17	NM_178862	201595	Hs.475812	NM_178862	ENSG00000163527	STT3B	CDG1X|SIMP|STT3-B	STT3B, catalytic subunit of the oligosaccharyltransferase complex	protein-coding
MEIS1_in_LV-MEIS1_peak_5433	chr8	24457977	24457977	+	26.1011	NA	intron (NM_003817, intron 3 of 21)	L1ME2z|LINE|L1	16981	NM_003817	8756	Hs.116147	NM_003817	ENSG00000069206	ADAM7	ADAM 7|ADAM-7|EAPI|GP-83|GP83	ADAM metallopeptidase domain 7	protein-coding
MEIS1_in_LV-MEIS1_peak_2832	chr2	51765053	51765053	+	26.1011	NA	intron (NR_135237, intron 6 of 10)	L1ME1|LINE|L1	-605595	NR_135239	105374596		NR_135239	ENSG00000225444	LINC01867	-	long intergenic non-protein coding RNA 1867	ncRNA
MEIS1_in_LV-MEIS1_peak_3976	chr4	87241492	87241492	+	26.1011	NA	Intergenic	L1MB7|LINE|L1	-20884	NR_120447	57563	Hs.106601	NM_020803	ENSG00000145332	KLHL8	-	kelch like family member 8	protein-coding
MEIS1_in_LV-MEIS1_peak_2395	chr17	82332282	82332282	+	26.1011	NA	intron (NM_003004, intron 1 of 4)	intron (NM_003004, intron 1 of 4)	1763	NM_003004	6398	Hs.558009	NM_003004	ENSG00000141574	SECTM1	K12	secreted and transmembrane 1	protein-coding
MEIS1_in_LV-MEIS1_peak_5900	chrX	15714708	15714708	+	26.1011	NA	Intergenic	Intergenic	-23581	NM_007220	11238	Hs.653287	NM_007220	ENSG00000169239	CA5B	CA-VB	carbonic anhydrase 5B	protein-coding
MEIS1_in_LV-MEIS1_peak_4853	chr6	139537044	139537044	+	26.1011	NA	Intergenic	Intergenic	-62448	NR_033919	645434	Hs.666240	NR_033919	ENSG00000238099	LINC01625	-	long intergenic non-protein coding RNA 1625	ncRNA
MEIS1_in_LV-MEIS1_peak_1630	chr13	40344006	40344006	+	26.1011	NA	Intergenic	Intergenic	-123504	NR_033877	400123	Hs.577960	NR_033877	ENSG00000215483	LINC00548	-	long intergenic non-protein coding RNA 548	ncRNA
MEIS1_in_LV-MEIS1_peak_2831	chr2	51483967	51483967	+	26.1011	NA	intron (NR_135237, intron 4 of 10)	intron (NR_135237, intron 4 of 10)	451366	NR_135237	730100	Hs.640140	NR_135237	ENSG00000231918	LOC730100	-	uncharacterized LOC730100	ncRNA
MEIS1_in_LV-MEIS1_peak_3486	chr3	63975941	63975941	+	26.1011	NA	intron (NM_001128149, intron 1 of 8)	(TGTC)n|Simple_repeat|Simple_repeat	8197	NM_001128149	6314	Hs.476595	NM_000333	ENSG00000163635	ATXN7	ADCAII|OPCA3|SCA7	ataxin 7	protein-coding
MEIS1_in_LV-MEIS1_peak_2002	chr15	41928187	41928187	+	26.1011	NA	intron (NR_120332, intron 2 of 3)	intron (NR_120332, intron 2 of 3)	6770	NR_120332	101928363	Hs.680195	NR_120332		EHD4-AS1	-	EHD4 antisense RNA 1	ncRNA
MEIS1_in_LV-MEIS1_peak_2062	chr15	69987952	69987952	+	26.1011	NA	Intergenic	Intergenic	91516	NR_030714	693214		NR_030714	ENSG00000207965	MIR629	MIRN629|hsa-mir-629|mir-629	microRNA 629	ncRNA
MEIS1_in_LV-MEIS1_peak_5897	chrX	11449838	11449838	+	26.1011	NA	intron (NR_109776, intron 1 of 14)	intron (NR_109776, intron 1 of 14)	-22053	NM_001287242	395	Hs.435291	NM_001174	ENSG00000047648	ARHGAP6	RHOGAP6|RHOGAPX-1	Rho GTPase activating protein 6	protein-coding
MEIS1_in_LV-MEIS1_peak_4712	chr6	63487359	63487359	+	26.1011	NA	Intergenic	Intergenic	-84653	NM_003463	7803	Hs.227777	NM_003463	ENSG00000112245	PTP4A1	HH72|PRL-1|PRL1|PTP(CAAX1)|PTPCAAX1	protein tyrosine phosphatase type IVA, member 1	protein-coding
MEIS1_in_LV-MEIS1_peak_1792	chr14	20343363	20343363	+	26.1011	NA	promoter-TSS (NR_002312)	promoter-TSS (NR_002312)	48	NR_002312	85495	Hs.613102	NR_002312	ENSG00000277209	RPPH1	H1RNA|RPPH1-1	ribonuclease P RNA component H1	ncRNA
MEIS1_in_LV-MEIS1_peak_3985	chr4	88145238	88145238	+	26.1011	NA	intron (NM_001257386, intron 1 of 15)	intron (NM_001257386, intron 1 of 15)	13621	NM_004827	9429	Hs.480218	NM_004827	ENSG00000118777	ABCG2	ABC15|ABCP|BCRP|BCRP1|BMDP|CD338|CDw338|EST157481|GOUT1|MRX|MXR|MXR-1|MXR1|UAQTL1	ATP binding cassette subfamily G member 2 (Junior blood group)	protein-coding
MEIS1_in_LV-MEIS1_peak_3324	chr22	31179595	31179595	+	26.1011	NA	intron (NR_024212, intron 1 of 5)	intron (NR_024212, intron 1 of 5)	19443	NR_024212	91445	Hs.517553	NM_152267	ENSG00000138942	RNF185	-	ring finger protein 185	protein-coding
MEIS1_in_LV-MEIS1_peak_5092	chr7	64877511	64877511	+	26.1011	NA	Intergenic	SST1|Satellite|centr	-25731	NM_021148	10793	Hs.520889	NM_021148	ENSG00000198039	ZNF273	HZF9	zinc finger protein 273	protein-coding
MEIS1_in_LV-MEIS1_peak_2568	chr19	11639700	11639700	+	26.1011	NA	Intergenic	Intergenic	27389	NR_002944	664709	Hs.534822	NR_002944		HNRNPA1P10	HNRPA1L-2	heterogeneous nuclear ribonucleoprotein A1 pseudogene 10	pseudo
MEIS1_in_LV-MEIS1_peak_5918	chrX	69948494	69948494	+	26.1011	NA	intron (NM_001005609, intron 1 of 7)	intron (NM_001005609, intron 1 of 7)	-74363	NR_037494	100500887		NR_037494	ENSG00000211991	MIR676	hsa-mir-676|mir-676	microRNA 676	ncRNA
MEIS1_in_LV-MEIS1_peak_3919	chr4	51907234	51907234	+	26.1011	NA	intron (NM_015115, intron 8 of 9)	intron (NM_015115, intron 8 of 9)	63655	NM_001287755	23142	Hs.605388	NM_015115	ENSG00000109184	DCUN1D4	-	defective in cullin neddylation 1 domain containing 4	protein-coding
MEIS1_in_LV-MEIS1_peak_2569	chr19	11694998	11694998	+	26.1011	NA	Intergenic	CpG	21000	NR_028594	401898	Hs.672384	NM_001013691		ZNF833P	ZNF833	zinc finger protein 833, pseudogene	pseudo
MEIS1_in_LV-MEIS1_peak_2616	chr19	19865741	19865741	+	26.1011	NA	promoter-TSS (NM_021047)	promoter-TSS (NM_021047)	-89	NM_001331133	56242	Hs.301059	NM_021047	ENSG00000256771	ZNF253	BMZF-1|BMZF1|ZNF411	zinc finger protein 253	protein-coding
MEIS1_in_LV-MEIS1_peak_5696	chr9	33076792	33076792	+	26.0427	NA	promoter-TSS (NM_018225)	promoter-TSS (NM_018225)	-76	NM_018225	55234	Hs.655351	NM_018225	ENSG00000122692	SMU1	BWD|SMU-1|fSAP57	SMU1, DNA replication regulator and spliceosomal factor	protein-coding
MEIS1_in_LV-MEIS1_peak_2391	chr17	81394142	81394142	+	26.0132	NA	Intergenic	CpG	-5579	NM_001291324	57597	Hs.514580	NM_024696	ENSG00000266074	BAHCC1	BAHD2	BAH domain and coiled-coil containing 1	protein-coding
MEIS1_in_LV-MEIS1_peak_1346	chr12	60704736	60704736	+	25.9706	NA	Intergenic	LTR40a|LTR|ERVL	1015399	NR_073056	9194	Hs.88156	NM_004731	ENSG00000118596	SLC16A7	MCT2	solute carrier family 16 member 7	protein-coding
MEIS1_in_LV-MEIS1_peak_48	chr1	21332352	21332352	+	25.9689	NA	intron (NM_001113348, intron 1 of 18)	MIR|SINE|MIR	13189	NM_001113348	1889	Hs.195080	NM_001397	ENSG00000117298	ECE1	ECE	endothelin converting enzyme 1	protein-coding
MEIS1_in_LV-MEIS1_peak_945	chr11	41779661	41779661	+	25.8951	NA	intron (NR_120584, intron 2 of 5)	intron (NR_120584, intron 2 of 5)	65093	NR_120584	102723644	Hs.564283	NR_120584	ENSG00000255171	LINC01499	-	long intergenic non-protein coding RNA 1499	ncRNA
MEIS1_in_LV-MEIS1_peak_332	chr1	154937337	154937337	+	25.8773	NA	promoter-TSS (NM_006556)	promoter-TSS (NM_006556)	-329	NM_006556	10654	Hs.30954	NM_006556	ENSG00000163344	PMVK	HUMPMKI|PMK|PMKA|PMKASE|POROK1	phosphomevalonate kinase	protein-coding
MEIS1_in_LV-MEIS1_peak_4942	chr7	9598541	9598541	+	25.8773	NA	Intergenic	L1MC4|LINE|L1	-35729	NR_002790	168741	Hs.545134	NR_002790		PER4	-	period circadian regulator 3 pseudogene	pseudo
MEIS1_in_LV-MEIS1_peak_1448	chr12	91099621	91099621	+	25.8773	NA	Intergenic	L2a|LINE|L2	12144	NM_002345	4060	Hs.406475	NM_002345	ENSG00000139329	LUM	LDC|SLRR2D	lumican	protein-coding
MEIS1_in_LV-MEIS1_peak_848	chr10	103368735	103368735	+	25.8486	NA	intron (NM_006951, intron 1 of 10)	intron (NM_006951, intron 1 of 10)	782	NM_006951	6877	Hs.96103	NM_006951	ENSG00000148835	TAF5	TAF(II)100|TAF2D|TAFII-100|TAFII100	TATA-box binding protein associated factor 5	protein-coding
MEIS1_in_LV-MEIS1_peak_1510	chr12	105092567	105092567	+	25.8486	NA	Intergenic	LTR9C|LTR|ERV1	-8004	NR_027752	160428	Hs.42572	NM_001034173	ENSG00000136010	ALDH1L2	mtFDH	aldehyde dehydrogenase 1 family member L2	protein-coding
MEIS1_in_LV-MEIS1_peak_4397	chr5	101929880	101929880	+	25.7311	NA	Intergenic	Intergenic	366669	NM_180991	353189	Hs.127648	NM_180991	ENSG00000173930	SLCO4C1	OATP-H|OATP-M1|OATP4C1|OATPX|PRO2176|SLC21A20	solute carrier organic anion transporter family member 4C1	protein-coding
MEIS1_in_LV-MEIS1_peak_4115	chr4	134196921	134196921	+	25.7311	NA	3' UTR (NM_001114734, exon 2 of 2)	3' UTR (NM_001114734, exon 2 of 2)	4827	NM_001114734	132430	Hs.49889	NM_001114734	ENSG00000254535	PABPC4L	-	poly(A) binding protein cytoplasmic 4 like	protein-coding
MEIS1_in_LV-MEIS1_peak_4205	chr4	176323693	176323693	+	25.7182	NA	intron (NM_021928, intron 2 of 4)	intron (NM_021928, intron 2 of 4)	3754	NM_021928	60559	Hs.42194	NM_021928	ENSG00000129128	SPCS3	PRO3567|SPC22/23|SPC3|YLR066W	signal peptidase complex subunit 3	protein-coding
MEIS1_in_LV-MEIS1_peak_382	chr1	167697942	167697942	+	25.6832	NA	intron (NM_001322923, intron 5 of 5)	intron (NM_001322923, intron 5 of 5)	-24008	NM_003953	9019	Hs.493919	NM_003953	ENSG00000197965	MPZL1	MPZL1b|PZR|PZR1b|PZRa|PZRb	myelin protein zero like 1	protein-coding
MEIS1_in_LV-MEIS1_peak_672	chr10	10200	10200	+	25.6555	NA	Intergenic	(CTAACC)n|Simple_repeat|Simple_repeat	-1521	NR_110795	102723376	Hs.606852	NR_110795		LOC102723376	-	uncharacterized LOC102723376	ncRNA
MEIS1_in_LV-MEIS1_peak_2571	chr19	11767062	11767062	+	25.6365	NA	promoter-TSS (NM_152355)	promoter-TSS (NM_152355)	62	NM_152355	126068	Hs.675132	NM_152355	ENSG00000197044	ZNF441	-	zinc finger protein 441	protein-coding
MEIS1_in_LV-MEIS1_peak_1325	chr12	56300458	56300458	+	25.6365	NA	promoter-TSS (NM_004077)	promoter-TSS (NM_004077)	-67	NM_004077	1431	Hs.743252	NM_004077	ENSG00000062485	CS	-	citrate synthase	protein-coding
MEIS1_in_LV-MEIS1_peak_1540	chr12	114684381	114684381	+	25.6365	NA	promoter-TSS (NM_016569)	promoter-TSS (NM_016569)	-217	NM_005996	6926	Hs.744016	NM_005996	ENSG00000135111	TBX3	TBX3-ISO|UMS|XHL	T-box 3	protein-coding
MEIS1_in_LV-MEIS1_peak_2914	chr2	100005224	100005224	+	25.6365	NA	intron (NM_001025108, intron 6 of 23)	Charlie19a|DNA|hAT-Charlie	100359	NM_001025108	3899	Hs.444414	NM_002285	ENSG00000144218	AFF3	LAF4|MLLT2-like	AF4/FMR2 family member 3	protein-coding
MEIS1_in_LV-MEIS1_peak_5601	chr8	112461265	112461265	+	25.6365	NA	intron (NM_198123, intron 32 of 70)	intron (NM_198123, intron 32 of 70)	-182228	NR_031745	100302225		NR_031745	ENSG00000238399	MIR2053	hsa-mir-2053	microRNA 2053	ncRNA
MEIS1_in_LV-MEIS1_peak_3035	chr2	195038285	195038285	+	25.6314	NA	Intergenic	Intergenic	307690	NR_110223	101927431	Hs.558215	NR_110223	ENSG00000230173	LINC01790	-	long intergenic non-protein coding RNA 1790	ncRNA
MEIS1_in_LV-MEIS1_peak_4153	chr4	145181078	145181078	+	25.6296	NA	Intergenic	Intergenic	-1398	NM_001102653	54726	Hs.270851	NM_017493	ENSG00000164164	OTUD4	DUBA6|HIN1|HSHIN1	OTU deubiquitinase 4	protein-coding
MEIS1_in_LV-MEIS1_peak_4427	chr5	116926223	116926223	+	25.5936	NA	Intergenic	Intergenic	-164014	NR_104678	102467223	Hs.570916	NR_104678		LINC02214	-	long intergenic non-protein coding RNA 2214	ncRNA
MEIS1_in_LV-MEIS1_peak_3901	chr4	38675664	38675664	+	25.5667	NA	intron (NM_016531, intron 1 of 5)	intron (NM_016531, intron 1 of 5)	-11036	NR_026804	79667	Hs.29725	NM_024614	ENSG00000231160	KLF3-AS1	-	KLF3 antisense RNA 1	ncRNA
MEIS1_in_LV-MEIS1_peak_2909	chr2	96680737	96680737	+	25.5667	NA	intron (NM_001293083, intron 19 of 52)	L1ME3A|LINE|L1	38000	NM_001293083	90342	Hs.534025	NM_001077400	ENSG00000249715	FER1L5	-	fer-1 like family member 5	protein-coding
MEIS1_in_LV-MEIS1_peak_1909	chr14	68164956	68164956	+	25.5667	NA	intron (NM_002877, intron 7 of 10)	intron (NM_002877, intron 7 of 10)	341364	NM_001321815	5890	Hs.172587	NM_002877	ENSG00000182185	RAD51B	R51H2|RAD51L1|REC2	RAD51 paralog B	protein-coding
MEIS1_in_LV-MEIS1_peak_2290	chr17	35257487	35257487	+	25.5667	NA	intron (NM_001330183, intron 1 of 3)	intron (NM_001330183, intron 1 of 3)	14420	NM_144975	162394	Hs.585792	NM_144975	ENSG00000166750	SLFN5	-	schlafen family member 5	protein-coding
MEIS1_in_LV-MEIS1_peak_876	chr11	3379285	3379285	+	25.5667	NA	promoter-TSS (NR_040083)	promoter-TSS (NR_040083)	-63	NR_046381	7748	Hs.386294	NM_007152	ENSG00000005801	ZNF195	HRF1|ZNFP104	zinc finger protein 195	protein-coding
MEIS1_in_LV-MEIS1_peak_5633	chr8	140464428	140464428	+	25.5667	NA	Intergenic	CpG	-5849	NM_031466	83696	Hs.654911	NM_031466	ENSG00000167632	TRAPPC9	IBP|IKBKBBP|MRT13|NIBP|T1|TRS120	trafficking protein particle complex 9	protein-coding
MEIS1_in_LV-MEIS1_peak_798	chr10	76087074	76087074	+	25.5667	NA	intron (NR_131178, intron 6 of 7)	intron (NR_131178, intron 6 of 7)	304313	NM_032024	83938	Hs.118161	NM_032024	ENSG00000148655	LRMDA	C10orf11|CDA017	leucine rich melanocyte differentiation associated	protein-coding
MEIS1_in_LV-MEIS1_peak_3458	chr3	50299723	50299723	+	25.5667	NA	promoter-TSS (NM_003549)	promoter-TSS (NM_003549)	-255	NM_001200032	8372	Hs.129910	NM_003549	ENSG00000186792	HYAL3	HYAL-3|LUCA-3|LUCA3	hyaluronoglucosaminidase 3	protein-coding
MEIS1_in_LV-MEIS1_peak_1946	chr14	84643704	84643704	+	25.5667	NA	Intergenic	Intergenic	-743571	NR_135155	105370605		NR_135155	ENSG00000258814	LINC02329	-	long intergenic non-protein coding RNA 2329	ncRNA
MEIS1_in_LV-MEIS1_peak_1910	chr14	68168690	68168690	+	25.5667	NA	intron (NM_002877, intron 7 of 10)	intron (NM_002877, intron 7 of 10)	345098	NM_001321815	5890	Hs.172587	NM_002877	ENSG00000182185	RAD51B	R51H2|RAD51L1|REC2	RAD51 paralog B	protein-coding
MEIS1_in_LV-MEIS1_peak_251	chr1	144546111	144546111	+	25.5667	NA	Intergenic	LTR4|LTR|ERV1	-46757	NM_001144032	730262		NM_001144032	ENSG00000271567	PPIAL4E	COAS2	peptidylprolyl isomerase A like 4E	protein-coding
MEIS1_in_LV-MEIS1_peak_3923	chr4	55569232	55569232	+	25.5667	NA	intron (NM_152401, intron 4 of 5)	intron (NM_152401, intron 4 of 5)	-22323	NM_004898	9575	Hs.436975	NM_004898	ENSG00000134852	CLOCK	KAT13D|bHLHe8	clock circadian regulator	protein-coding
MEIS1_in_LV-MEIS1_peak_3473	chr3	55620960	55620960	+	25.5667	NA	intron (NR_132749, intron 16 of 17)	intron (NR_132749, intron 16 of 17)	38509	NR_024615	711	Hs.667161	NR_024615	ENSG00000281708	ERC2-IT1	C1orf1|C3orf51|Po42	ERC2 intronic transcript 1	ncRNA
MEIS1_in_LV-MEIS1_peak_2431	chr18	23684809	23684809	+	25.4749	NA	Intergenic	Intergenic	-4634	NR_130106	3909	Hs.436367	NM_000227	ENSG00000053747	LAMA3	BM600|E170|LAMNA|LOCS	laminin subunit alpha 3	protein-coding
MEIS1_in_LV-MEIS1_peak_2526	chr19	2977299	2977299	+	25.4749	NA	promoter-TSS (NM_024760)	promoter-TSS (NM_024760)	-234	NR_138612	79816	Hs.334507	NM_024760	ENSG00000104953	TLE6	GRG6|PREMBL	transducin like enhancer of split 6	protein-coding
MEIS1_in_LV-MEIS1_peak_962	chr11	49196232	49196232	+	25.4698	NA	intron (NM_001193473, intron 2 of 16)	intron (NM_001193473, intron 2 of 16)	12438	NM_001014986	2346	Hs.551896	NM_004476	ENSG00000086205	FOLH1	FGCP|FOLH|GCP2|GCPII|NAALAD1|NAALAdase|PSM|PSMA|mGCP	folate hydrolase 1	protein-coding
MEIS1_in_LV-MEIS1_peak_5849	chr9	125904429	125904429	+	25.445	NA	intron (NR_024123, intron 2 of 6)	intron (NR_024123, intron 2 of 6)	156230	NM_001134778	5090	Hs.428027	NM_006195	ENSG00000167081	PBX3	-	PBX homeobox 3	protein-coding
MEIS1_in_LV-MEIS1_peak_3415	chr3	25229848	25229848	+	25.2617	NA	intron (NM_001290216, intron 4 of 10)	intron (NM_001290216, intron 4 of 10)	-110954	NM_001290300	5915	Hs.543218	NM_000965	ENSG00000077092	RARB	HAP|MCOPS12|NR1B2|RARbeta1|RRB2	retinoic acid receptor beta	protein-coding
MEIS1_in_LV-MEIS1_peak_3072	chr2	211378790	211378790	+	25.1692	NA	3' UTR (NM_005235, exon 28 of 28)	3' UTR (NM_005235, exon 28 of 28)	761219	NR_002763	29034	Hs.658398	NR_002763	ENSG00000280837	CPS1-IT1	CPS1-IT|CPS1IT|CPS1IT1|PRO0132	CPS1 intronic transcript 1	ncRNA
MEIS1_in_LV-MEIS1_peak_3541	chr3	89503924	89503924	+	25.1534	NA	Intergenic	Intergenic	396400	NM_005233	2042	Hs.123642	NM_005233	ENSG00000044524	EPHA3	EK4|ETK|ETK1|HEK|HEK4|TYRO4	EPH receptor A3	protein-coding
MEIS1_in_LV-MEIS1_peak_5420	chr8	15014143	15014143	+	25.1534	NA	intron (NM_139167, intron 1 of 7)	MamRTE1|LINE|RTE-BovB	-160633	NR_029875	494332		NR_029875	ENSG00000199127	MIR383	MIRN383|hsa-mir-383|mir-383	microRNA 383	ncRNA
MEIS1_in_LV-MEIS1_peak_5531	chr8	80084375	80084375	+	25.1534	NA	intron (NM_005079, intron 1 of 5)	intron (NM_005079, intron 1 of 5)	-3544	NM_001287143	7163	Hs.368433	NM_005079	ENSG00000076554	TPD52	D52|N8L|PC-1|PrLZ|hD52	tumor protein D52	protein-coding
MEIS1_in_LV-MEIS1_peak_5139	chr7	77791476	77791476	+	25.1505	NA	Intergenic	Intergenic	6954	NM_032936	85025	Hs.19025	NM_032936	ENSG00000135211	TMEM60	C7orf35|DC32	transmembrane protein 60	protein-coding
MEIS1_in_LV-MEIS1_peak_1345	chr12	60265950	60265950	+	25.1434	NA	Intergenic	Intergenic	576613	NR_073056	9194	Hs.88156	NM_004731	ENSG00000118596	SLC16A7	MCT2	solute carrier family 16 member 7	protein-coding
MEIS1_in_LV-MEIS1_peak_417	chr1	178781737	178781737	+	25.1291	NA	intron (NM_152663, intron 2 of 19)	intron (NM_152663, intron 2 of 19)	56590	NM_001286247	55103	Hs.632485	NM_018037	ENSG00000116191	RALGPS2	dJ595C2.1	Ral GEF with PH domain and SH3 binding motif 2	protein-coding
MEIS1_in_LV-MEIS1_peak_4403	chr5	104659639	104659639	+	25.1188	NA	Intergenic	Intergenic	-439835	NR_000039	9366	Hs.158296	NR_000039	ENSG00000232159	RAB9BP1	RAB9P1	RAB9B, member RAS oncogene family pseudogene 1	pseudo
MEIS1_in_LV-MEIS1_peak_4389	chr5	98929683	98929683	+	25.1188	NA	non-coding (NR_036530, exon 1 of 1)	non-coding (NR_036530, exon 1 of 1)	549	NR_036530	100289230	Hs.552095	NR_036530		LOC100289230	-	uncharacterized LOC100289230	ncRNA
MEIS1_in_LV-MEIS1_peak_3928	chr4	60649908	60649908	+	25.1188	NA	Intergenic	Intergenic	-272711	NR_039652	100616450		NR_039652	ENSG00000265829	MIR548AG1	-	microRNA 548ag-1	ncRNA
MEIS1_in_LV-MEIS1_peak_5528	chr8	78530676	78530676	+	25.1188	NA	intron (NM_181839, intron 1 of 2)	intron (NM_181839, intron 1 of 2)	14575	NM_006823	5569	Hs.433700	NM_006823	ENSG00000171033	PKIA	PRKACN1	cAMP-dependent protein kinase inhibitor alpha	protein-coding
MEIS1_in_LV-MEIS1_peak_768	chr10	67115179	67115179	+	25.1188	NA	intron (NM_001127384, intron 7 of 17)	intron (NM_001127384, intron 7 of 17)	102913	NR_111909	347731	Hs.652155	NM_178011	ENSG00000198739	LRRTM3	-	leucine rich repeat transmembrane neuronal 3	protein-coding
MEIS1_in_LV-MEIS1_peak_4108	chr4	130635675	130635675	+	25.1188	NA	Intergenic	Intergenic	-864197	NR_110753	101927282	Hs.407480	NR_110753	ENSG00000246876	LINC02466	-	long intergenic non-protein coding RNA 2466	ncRNA
MEIS1_in_LV-MEIS1_peak_3880	chr4	28149954	28149954	+	25.1188	NA	Intergenic	Intergenic	-669628	NR_036237	100422937		NR_036237	ENSG00000283275	MIR4275	-	microRNA 4275	ncRNA
MEIS1_in_LV-MEIS1_peak_5213	chr7	97354316	97354316	+	25.1188	NA	Intergenic	Intergenic	237723	NM_020186	57001	Hs.592269	NM_020186	ENSG00000196636	SDHAF3	ACN9|DC11|LYRM10|Sdh7	succinate dehydrogenase complex assembly factor 3	protein-coding
MEIS1_in_LV-MEIS1_peak_1468	chr12	95003742	95003742	+	25.1188	NA	promoter-TSS (NM_001258338)	promoter-TSS (NM_001258338)	-29	NM_018838	55967	Hs.506374	NM_018838	ENSG00000184752	NDUFA12	B17.2|DAP13	NADH:ubiquinone oxidoreductase subunit A12	protein-coding
MEIS1_in_LV-MEIS1_peak_5015	chr7	27096126	27096126	+	25.1188	NA	promoter-TSS (NM_005522)	promoter-TSS (NM_005522)	32	NR_038367	100506311	Hs.445239	NR_038366	ENSG00000233429	HOTAIRM1	HOXA-AS1|HOXA1-AS1|NCRNA00179	HOXA transcript antisense RNA, myeloid-specific 1	ncRNA
MEIS1_in_LV-MEIS1_peak_1869	chr14	48235283	48235283	+	25.1188	NA	Intergenic	Intergenic	-440269	NR_039996	100506433	Hs.547419	NR_039996	ENSG00000259129	LINC00648	-	long intergenic non-protein coding RNA 648	ncRNA
MEIS1_in_LV-MEIS1_peak_1102	chr11	111309619	111309619	+	25.0976	NA	TTS (NM_001271458)	TTS (NM_001271458)	-4571	NM_001302644	399948	Hs.729225	NM_207429		COLCA1	C11orf92|CASC12|LOH11CR1F	colorectal cancer associated 1	protein-coding
MEIS1_in_LV-MEIS1_peak_5318	chr7	120504586	120504586	+	25.0976	NA	intron (NM_012281, intron 1 of 5)	intron (NM_012281, intron 1 of 5)	230918	NM_012281	3751	Hs.654739	NM_012281	ENSG00000184408	KCND2	KV4.2|RK5	potassium voltage-gated channel subfamily D member 2	protein-coding
MEIS1_in_LV-MEIS1_peak_893	chr11	11246745	11246745	+	25.0976	NA	Intergenic	Intergenic	106612	NM_001256686	283106	Hs.654675	NM_001256686	ENSG00000254598	CSNK2A3	CSNK2A1P	casein kinase 2 alpha 3	protein-coding
MEIS1_in_LV-MEIS1_peak_1182	chr12	13127629	13127629	+	25.0458	NA	Intergenic	Intergenic	-23933	NM_001206842	83445	Hs.240053	NM_031289	ENSG00000111305	GSG1	-	germ cell associated 1	protein-coding
MEIS1_in_LV-MEIS1_peak_1404	chr12	74614571	74614571	+	25.0421	NA	Intergenic	Intergenic	76800	NM_001136262	552889	Hs.744849	NM_001136262	ENSG00000253719	ATXN7L3B	lnc-SCA7	ataxin 7 like 3B	protein-coding
MEIS1_in_LV-MEIS1_peak_2349	chr17	60677413	60677413	+	25.0164	NA	promoter-TSS (NM_001330413)	promoter-TSS (NM_001330413)	-362	NM_001330413	54828	Hs.655028	NM_017679	ENSG00000141376	BCAS3	GAOB1|MAAB	BCAS3, microtubule associated cell migration factor	protein-coding
MEIS1_in_LV-MEIS1_peak_2356	chr17	64985346	64985346	+	25.0164	NA	Intergenic	Intergenic	-9761	NR_026903	201283	Hs.396447	NM_153032	ENSG00000214174	AMZ2P1	-	archaelysin family metallopeptidase 2 pseudogene 1	pseudo
MEIS1_in_LV-MEIS1_peak_2924	chr2	106269939	106269939	+	25.0164	NA	Intergenic	CpG	-75600	NM_001253875	80146	Hs.469561	NM_025076	ENSG00000115652	UXS1	SDR6E1|UGD	UDP-glucuronate decarboxylase 1	protein-coding
MEIS1_in_LV-MEIS1_peak_817	chr10	88346808	88346808	+	25.0164	NA	intron (NM_001031709, intron 5 of 6)	intron (NM_001031709, intron 5 of 6)	236517	NM_001031709	55328	Hs.149849	NM_018363	ENSG00000184719	RNLS	C10orf59|RENALASE	renalase, FAD dependent amine oxidase	protein-coding
MEIS1_in_LV-MEIS1_peak_4998	chr7	23273347	23273347	+	25.0164	NA	intron (NM_001005340, intron 9 of 10)	intron (NM_001005340, intron 9 of 10)	-25974	NM_138446	115416	Hs.87385	NM_138446	ENSG00000156928	MALSU1	C7orf30|mtRsfA	mitochondrial assembly of ribosomal large subunit 1	protein-coding
MEIS1_in_LV-MEIS1_peak_2685	chr19	46378460	46378460	+	25.0164	NA	intron (NM_001204284, intron 4 of 11)	L1ME2|LINE|L1	31466	NM_001204284	5536	Hs.654604	NM_006247	ENSG00000011485	PPP5C	PP5|PPP5|PPT	protein phosphatase 5 catalytic subunit	protein-coding
MEIS1_in_LV-MEIS1_peak_4554	chr5	163791414	163791414	+	25.0164	NA	Intergenic	Intergenic	285886	NM_013283	27430	Hs.54642	NM_013283	ENSG00000038274	MAT2B	MAT-II|MATIIbeta|Nbla02999|SDR23E1|TGR	methionine adenosyltransferase 2B	protein-coding
MEIS1_in_LV-MEIS1_peak_2576	chr19	11964950	11964950	+	25.0164	NA	promoter-TSS (NM_001012753)	promoter-TSS (NM_001012753)	-104	NM_001012753	284390	Hs.646386	NM_001012753	ENSG00000197054	ZNF763	ZNF|ZNF440L	zinc finger protein 763	protein-coding
MEIS1_in_LV-MEIS1_peak_2266	chr17	19063934	19063934	+	25.0164	NA	TTS (NR_003271).2	TTS (NR_003271).2	202	NR_003924	780852		NR_003924	ENSG00000262074	SNORD3B-2	U3-2B|U3b2	small nucleolar RNA, C/D box 3B-2	snoRNA
MEIS1_in_LV-MEIS1_peak_3305	chr22	19806591	19806591	+	25.0164	NA	intron (NM_053004, intron 6 of 7)	intron (NM_053004, intron 6 of 7)	48257	NM_024627	79680	Hs.105642	NM_024627	ENSG00000215012	RTL10	BOP|C22orf29	retrotransposon Gag like 10	protein-coding
MEIS1_in_LV-MEIS1_peak_3321	chr22	29907938	29907938	+	25.0164	NA	intron (NM_153051, intron 1 of 18)	intron (NM_153051, intron 1 of 18)	24769	NM_021090	8897	Hs.474536	NM_021090	ENSG00000100330	MTMR3	FYVE-DSP1|ZFYVE10	myotubularin related protein 3	protein-coding
MEIS1_in_LV-MEIS1_peak_4619	chr6	20933524	20933524	+	25.0164	NA	intron (NM_017774, intron 9 of 15)	intron (NM_017774, intron 9 of 15)	399067	NM_017774	54901	Hs.657604	NM_017774	ENSG00000145996	CDKAL1	-	CDK5 regulatory subunit associated protein 1 like 1	protein-coding
MEIS1_in_LV-MEIS1_peak_3916	chr4	47692831	47692831	+	25.0164	NA	intron (NM_001278586, intron 6 of 13)	intron (NM_001278586, intron 6 of 13)	40162	NR_107020	102467004		NR_107020	ENSG00000277388	MIR8053	hsa-mir-8053	microRNA 8053	ncRNA
MEIS1_in_LV-MEIS1_peak_2582	chr19	12162940	12162940	+	25.0164	NA	promoter-TSS (NM_001348013)	promoter-TSS (NM_001348013)	-107	NM_003437	7695	Hs.479874	NM_003437	ENSG00000196646	ZNF136	pHZ-20	zinc finger protein 136	protein-coding
MEIS1_in_LV-MEIS1_peak_2970	chr2	157291207	157291207	+	25.0164	NA	intron (NM_014568, intron 3 of 9)	intron (NM_014568, intron 3 of 9)	33609	NM_014568	11227	Hs.269027	NM_014568	ENSG00000136542	GALNT5	GALNAC-T5|GALNACT5	polypeptide N-acetylgalactosaminyltransferase 5	protein-coding
MEIS1_in_LV-MEIS1_peak_5843	chr9	124658317	124658317	+	25.0164	NA	promoter-TSS (NR_038975)	promoter-TSS (NR_038975)	-119	NR_038975	100379345	Hs.660412	NR_038975	ENSG00000224020	MIR181A2HG	-	MIR181A2 host gene	ncRNA
MEIS1_in_LV-MEIS1_peak_22	chr1	9436413	9436413	+	25.0164	NA	Intergenic	Intergenic	-7417	NR_104622	100506022	Hs.131775	NR_104622	ENSG00000284693	LOC100506022	-	uncharacterized LOC100506022	ncRNA
MEIS1_in_LV-MEIS1_peak_4232	chr5	14264853	14264853	+	25.0164	NA	intron (NR_134469, intron 1 of 56)	intron (NR_134469, intron 1 of 56)	121151	NR_134469	7204	Hs.130031	NM_007118	ENSG00000038382	TRIO	ARHGEF23|MEBAS|MRD44|tgat	trio Rho guanine nucleotide exchange factor	protein-coding
MEIS1_in_LV-MEIS1_peak_221	chr1	113812415	113812415	+	25.0164	NA	promoter-TSS (NM_018364)	promoter-TSS (NM_018364)	61	NR_130896	54665	Hs.486285	NM_018364	ENSG00000081019	RSBN1	KDM9|ROSBIN	round spermatid basic protein 1	protein-coding
MEIS1_in_LV-MEIS1_peak_2115	chr16	22212193	22212193	+	25.0164	NA	intron (NM_013302, intron 1 of 17)	intron (NM_013302, intron 1 of 17)	5922	NM_013302	29904	Hs.498892	NM_013302	ENSG00000103319	EEF2K	HSU93850|eEF-2K	eukaryotic elongation factor 2 kinase	protein-coding
MEIS1_in_LV-MEIS1_peak_4401	chr5	103703874	103703874	+	25.0164	NA	Intergenic	Intergenic	-141073	NM_001300741	83594	Hs.434289	NM_031438	ENSG00000112874	NUDT12	-	nudix hydrolase 12	protein-coding
MEIS1_in_LV-MEIS1_peak_2176	chr16	58129636	58129636	+	25.0164	NA	promoter-TSS (NR_136632)	promoter-TSS (NR_136632)	-211	NR_136632	29105	Hs.532755	NM_013242	ENSG00000070761	CFAP20	BUG22|C16orf80|EVORF|GTL3|fSAP23	cilia and flagella associated protein 20	protein-coding
MEIS1_in_LV-MEIS1_peak_5655	chr9	4244376	4244376	+	25.0164	NA	intron (NM_001042413, intron 2 of 10)	Tigger13a|DNA|TcMar-Tigger	55659	NM_001042413	169792	Hs.162125	NM_152629	ENSG00000107249	GLIS3	NDH|ZNF515	GLIS family zinc finger 3	protein-coding
MEIS1_in_LV-MEIS1_peak_4799	chr6	112019289	112019289	+	25.0164	NA	Intergenic	Intergenic	-34786	NR_125354	8838	Hs.558428	NM_003880	ENSG00000112761	WISP3	CCN6|LIBC|PPAC|PPD|WISP-3	WNT1 inducible signaling pathway protein 3	protein-coding
MEIS1_in_LV-MEIS1_peak_1551	chr12	117803161	117803161	+	25.0164	NA	intron (NM_173598, intron 3 of 19)	intron (NM_173598, intron 3 of 19)	165062	NM_173598	283455	Hs.375836	NM_173598	ENSG00000171435	KSR2	-	kinase suppressor of ras 2	protein-coding
MEIS1_in_LV-MEIS1_peak_5425	chr8	18179870	18179870	+	25.0164	NA	intron (NM_001291962, intron 2 of 5)	intron (NM_001291962, intron 2 of 5)	9408	NM_001160179	9	Hs.591847	NM_000662	ENSG00000171428	NAT1	AAC1|MNAT|NAT-1|NATI	N-acetyltransferase 1	protein-coding
MEIS1_in_LV-MEIS1_peak_3488	chr3	67516668	67516668	+	24.9708	NA	intron (NM_001177599, intron 6 of 10)	L2a|LINE|L2	137946	NM_001177599	8801	Hs.644919	NM_003848	ENSG00000172340	SUCLG2	G-SCS|GBETA|GTPSCS	succinate-CoA ligase GDP-forming beta subunit	protein-coding
MEIS1_in_LV-MEIS1_peak_4446	chr5	120091497	120091497	+	24.9708	NA	Intergenic	Intergenic	-372781	NM_001300783	51334	Hs.157461	NM_016644	ENSG00000184838	PRR16	DSC54|LARGEN	proline rich 16	protein-coding
MEIS1_in_LV-MEIS1_peak_5614	chr8	123274860	123274860	+	24.9439	NA	promoter-TSS (NM_001204180)	promoter-TSS (NM_001204180)	-373	NM_001204180	100533106	Hs.707401	NM_001204180	ENSG00000259305	ZHX1-C8orf76	-	ZHX1-C8orf76 readthrough	protein-coding
MEIS1_in_LV-MEIS1_peak_3938	chr4	69214953	69214953	+	24.9143	NA	promoter-TSS (NM_001073)	promoter-TSS (NM_001073)	-222	NM_001073	10720	Hs.339811	NM_001073	ENSG00000213759	UGT2B11	-	UDP glucuronosyltransferase family 2 member B11	protein-coding
MEIS1_in_LV-MEIS1_peak_5000	chr7	23470539	23470539	+	24.8461	NA	promoter-TSS (NM_006547)	promoter-TSS (NM_006547)	-163	NM_006547	10643	Hs.700696	NM_006547	ENSG00000136231	IGF2BP3	CT98|IMP-3|IMP3|KOC|KOC1|VICKZ3	insulin like growth factor 2 mRNA binding protein 3	protein-coding
MEIS1_in_LV-MEIS1_peak_4924	chr7	3711390	3711390	+	24.8213	NA	intron (NM_152744, intron 4 of 44)	L2a|LINE|L2	409942	NM_152744	221935	Hs.653013	NM_152744	ENSG00000146555	SDK1	-	sidekick cell adhesion molecule 1	protein-coding
MEIS1_in_LV-MEIS1_peak_3937	chr4	69096351	69096351	+	24.8213	NA	promoter-TSS (NM_001330719)	promoter-TSS (NM_001330719)	-123	NM_001074	7364	Hs.654424	NM_001074	ENSG00000171234	UGT2B7	UDPGT 2B7|UDPGT 2B9|UDPGT2B7|UDPGTH2|UDPGTh-2|UGT2B9	UDP glucuronosyltransferase family 2 member B7	protein-coding
MEIS1_in_LV-MEIS1_peak_5715	chr9	37328788	37328788	+	24.8004	NA	intron (NM_001289121, intron 6 of 8)	intron (NM_001289121, intron 6 of 8)	-93922	NM_012203	9380	Hs.155742	NM_012203	ENSG00000137106	GRHPR	GLXR|GLYD|PH2	glyoxylate and hydroxypyruvate reductase	protein-coding
MEIS1_in_LV-MEIS1_peak_859	chr10	114858115	114858115	+	24.6898	NA	intron (NM_001135051, intron 14 of 16)	intron (NM_001135051, intron 14 of 16)	36371	NM_020940	57700	Hs.192619	NM_020940	ENSG00000151553	FAM160B1	KIAA1600|bA106M7.3	family with sequence similarity 160 member B1	protein-coding
MEIS1_in_LV-MEIS1_peak_753	chr10	58086321	58086321	+	24.6898	NA	Intergenic	LTR86A1|LTR|ERVL	181613	NM_152230	253430	Hs.30280	NM_152230	ENSG00000151151	IPMK	-	inositol polyphosphate multikinase	protein-coding
MEIS1_in_LV-MEIS1_peak_639	chr1	235367343	235367343	+	24.6898	NA	promoter-TSS (NM_001287801)	promoter-TSS (NM_001287801)	-17	NM_001079515	6905	Hs.744998	NM_003193	ENSG00000284770	TBCE	HRD|KCS|KCS1|PEAMO|pac2	tubulin folding cofactor E	protein-coding
MEIS1_in_LV-MEIS1_peak_348	chr1	156457450	156457450	+	24.6778	NA	Intergenic	CpG	-27902	NR_135261	10485	Hs.380027	NM_006365	ENSG00000125462	C1orf61	CROC4	chromosome 1 open reading frame 61	protein-coding
MEIS1_in_LV-MEIS1_peak_2509	chr18	74496228	74496228	+	24.5782	NA	promoter-TSS (NM_018235)	promoter-TSS (NM_018235)	-37	NM_018235	55748	Hs.149185	NM_018235	ENSG00000133313	CNDP2	CN2|CPGL|HEL-S-13|HsT2298|PEPA	carnosine dipeptidase 2	protein-coding
MEIS1_in_LV-MEIS1_peak_3675	chr3	144552552	144552552	+	24.5772	NA	Intergenic	Intergenic	579227	NM_001134470	205428	Hs.288954	NM_173552	ENSG00000181744	C3orf58	DIA1|GoPro49|HASF	chromosome 3 open reading frame 58	protein-coding
MEIS1_in_LV-MEIS1_peak_435	chr1	181251248	181251248	+	24.512	NA	Intergenic	HERVK11-int|LTR|ERVK	14860	NR_046249	100287948	Hs.742594	NR_046249	ENSG00000179452	LINC01699	GM140	long intergenic non-protein coding RNA 1699	ncRNA
MEIS1_in_LV-MEIS1_peak_2545	chr19	8050801	8050801	+	24.494	NA	Intergenic	Intergenic	-1961	NM_005624	6370	Hs.310511	NM_005624	ENSG00000131142	CCL25	Ckb15|SCYA25|TECK	C-C motif chemokine ligand 25	protein-coding
MEIS1_in_LV-MEIS1_peak_2259	chr17	17534200	17534200	+	24.494	NA	intron (NM_148172, intron 2 of 6)	L1ME1|LINE|L1	-37805	NM_001199989	51655	Hs.25829	NM_016084	ENSG00000108551	RASD1	AGS1|DEXRAS1|MGC:26290	ras related dexamethasone induced 1	protein-coding
MEIS1_in_LV-MEIS1_peak_18	chr1	8526012	8526012	+	24.494	NA	intron (NM_012102, intron 8 of 23)	intron (NM_012102, intron 8 of 23)	-31099	NR_132752	106632271		NR_132752		SNORD128	ZL43	small nucleolar RNA, C/D box 128	snoRNA
MEIS1_in_LV-MEIS1_peak_5027	chr7	30505054	30505054	+	24.494	NA	promoter-TSS (NM_001199815)	promoter-TSS (NM_001199815)	-213	NM_001199815	79017	Hs.530024	NM_024051	ENSG00000006625	GGCT	C7orf24|CRF21|GCTG|GGC	gamma-glutamylcyclotransferase	protein-coding
MEIS1_in_LV-MEIS1_peak_1898	chr14	65095741	65095741	+	24.494	NA	intron (NR_073137, intron 1 of 3)	intron (NR_073137, intron 1 of 3)	5823	NR_045122	100506321	Hs.711267	NR_045122	ENSG00000259118	LOC100506321	-	uncharacterized LOC100506321	ncRNA
MEIS1_in_LV-MEIS1_peak_4189	chr4	162717112	162717112	+	24.494	NA	Intergenic	(AT)n|Simple_repeat|Simple_repeat	376516	NR_039659	100616234		NR_039659	ENSG00000283468	MIR4454	-	microRNA 4454	ncRNA
MEIS1_in_LV-MEIS1_peak_4173	chr4	155778649	155778649	+	24.4168	NA	intron (NM_001291955, intron 3 of 12)	UCON2|DNA?|DNA?	19676	NM_001291952	2983	Hs.77890	NM_000857	ENSG00000061918	GUCY1B1	GC-S-beta-1|GC-SB3|GUC1B3|GUCB3|GUCSB3|GUCY1B3	guanylate cyclase 1 soluble subunit beta 1	protein-coding
MEIS1_in_LV-MEIS1_peak_2904	chr2	88627465	88627465	+	24.3137	NA	promoter-TSS (NR_135540)	promoter-TSS (NR_135540)	111	NM_004836	9451	Hs.591589	NM_004836	ENSG00000172071	EIF2AK3	PEK|PERK|WRS	eukaryotic translation initiation factor 2 alpha kinase 3	protein-coding
MEIS1_in_LV-MEIS1_peak_3564	chr3	101557718	101557718	+	24.2946	NA	Intergenic	MER83|LTR|ERV1	-4118	NM_017819	54931	Hs.594839	NM_017819	ENSG00000174173	TRMT10C	COXPD30|HNYA|MRPP1|RG9MTD1	tRNA methyltransferase 10C, mitochondrial RNase P subunit	protein-coding
MEIS1_in_LV-MEIS1_peak_3515	chr3	80004481	80004481	+	24.2414	NA	Intergenic	Intergenic	-236572	NM_002941	6091	Hs.744218	NM_002941	ENSG00000169855	ROBO1	DUTT1|SAX3	roundabout guidance receptor 1	protein-coding
MEIS1_in_LV-MEIS1_peak_1348	chr12	60712952	60712952	+	24.2414	NA	Intergenic	L1M2|LINE|L1	1023615	NR_073056	9194	Hs.88156	NM_004731	ENSG00000118596	SLC16A7	MCT2	solute carrier family 16 member 7	protein-coding
MEIS1_in_LV-MEIS1_peak_1574	chr12	122111355	122111355	+	24.2183	NA	intron (NM_014938, intron 1 of 16)	intron (NM_014938, intron 1 of 16)	32627	NM_014938	22877	Hs.437153	NM_014938	ENSG00000175727	MLXIP	MIR|MONDOA|bHLHe36	MLX interacting protein	protein-coding
MEIS1_in_LV-MEIS1_peak_3131	chr2	237861339	237861339	+	24.2183	NA	intron (NM_005855, intron 1 of 2)	intron (NM_005855, intron 1 of 2)	1795	NM_005855	10267	Hs.471783	NM_005855	ENSG00000132329	RAMP1	-	receptor activity modifying protein 1	protein-coding
MEIS1_in_LV-MEIS1_peak_5546	chr8	81643930	81643930	+	24.2183	NA	Intergenic	Intergenic	42424	NM_005536	3612	Hs.656694	NM_005536	ENSG00000133731	IMPA1	IMP|IMPA|MRT59	inositol monophosphatase 1	protein-coding
MEIS1_in_LV-MEIS1_peak_5149	chr7	81493065	81493065	+	24.2183	NA	Intergenic	Intergenic	68754	NR_136264	105369146	Hs.730390	NR_136264		LOC105369146	-	uncharacterized LOC105369146	ncRNA
MEIS1_in_LV-MEIS1_peak_5678	chr9	20618470	20618470	+	24.1253	NA	intron (NM_001286691, intron 2 of 10)	intron (NM_001286691, intron 2 of 10)	3517	NM_001286691	4300	Hs.317248	NM_004529	ENSG00000171843	MLLT3	AF9|YEATS3	MLLT3, super elongation complex subunit	protein-coding
MEIS1_in_LV-MEIS1_peak_4180	chr4	160209891	160209891	+	24.1253	NA	Intergenic	Intergenic	942045	NM_014247	9693	Hs.744884	NM_014247	ENSG00000109756	RAPGEF2	CNrasGEF|NRAPGEP|PDZ-GEF1|PDZGEF1|RA-GEF|RA-GEF-1|Rap-GEP|nRap GEP	Rap guanine nucleotide exchange factor 2	protein-coding
MEIS1_in_LV-MEIS1_peak_1071	chr11	100841963	100841963	+	24.1253	NA	intron (NM_152432, intron 3 of 23)	L2a|LINE|L2	-150117	NM_032021	143872	Hs.44004	NM_032021	ENSG00000165895	ARHGAP42	AD031|GRAF3|TMEM133	Rho GTPase activating protein 42	protein-coding
MEIS1_in_LV-MEIS1_peak_3066	chr2	208015818	208015818	+	24.1253	NA	intron (NM_001080475, intron 1 of 7)	intron (NM_001080475, intron 1 of 7)	9742	NM_001080475	389072	Hs.159188	NM_001080475	ENSG00000178385	PLEKHM3	DAPR|PLEKHM1L	pleckstrin homology domain containing M3	protein-coding
MEIS1_in_LV-MEIS1_peak_1593	chr12	133265126	133265126	+	24.0836	NA	Intergenic	(GGGTTA)n|Simple_repeat|Simple_repeat	-29290	NM_001191054	647589	Hs.703008	NM_001191054	ENSG00000227059	ANHX	-	anomalous homeobox	protein-coding
MEIS1_in_LV-MEIS1_peak_1658	chr13	50809898	50809898	+	24.015	NA	intron (NR_046551, intron 2 of 4)	intron (NR_046551, intron 2 of 4)	2043	NR_046551	100874074	Hs.734030	NR_046551	ENSG00000237152	DLEU7-AS1	-	DLEU7 antisense RNA 1	ncRNA
MEIS1_in_LV-MEIS1_peak_405	chr1	174475590	174475590	+	24.0106	NA	intron (NM_014857, intron 13 of 20)	intron (NM_014857, intron 13 of 20)	27516	NM_005684	9293	Hs.673850	NM_005684	ENSG00000203737	GPR52	-	G protein-coupled receptor 52	protein-coding
MEIS1_in_LV-MEIS1_peak_1926	chr14	74493389	74493389	+	23.9521	NA	promoter-TSS (NM_006432)	promoter-TSS (NM_006432)	-8	NM_006432	10577	Hs.433222	NM_006432	ENSG00000119655	NPC2	EDDM1|HE1	NPC intracellular cholesterol transporter 2	protein-coding
MEIS1_in_LV-MEIS1_peak_4864	chr6	142376176	142376176	+	23.9487	NA	intron (NM_001032394, intron 4 of 24)	intron (NM_001032394, intron 4 of 24)	74257	NM_001032394	57211	Hs.743302	NM_020455	ENSG00000112414	ADGRG6	APG1|DREG|GPR126|LCCS9|PR126|PS1TP2|VIGR	adhesion G protein-coupled receptor G6	protein-coding
MEIS1_in_LV-MEIS1_peak_3925	chr4	56622401	56622401	+	23.9379	NA	Intergenic	Intergenic	34121	NM_139211	84525	Hs.619396	NM_032495	ENSG00000171476	HOPX	CAMEO|HOD|HOP|LAGY|NECC1|OB1|SMAP31|TOTO	HOP homeobox	protein-coding
MEIS1_in_LV-MEIS1_peak_1887	chr14	55753275	55753275	+	23.9379	NA	Intergenic	Intergenic	-12970	NR_004844	645683	Hs.663461	NR_004844	ENSG00000177350	RPL13AP3	RPL13A_11_1370	ribosomal protein L13a pseudogene 3	pseudo
MEIS1_in_LV-MEIS1_peak_1793	chr14	20417756	20417756	+	23.9379	NA	Intergenic	Intergenic	-4336	NM_001319035	7011	Hs.508835	NM_007110	ENSG00000129566	TEP1	TLP1|TP1|TROVE1|VAULT2|p240	telomerase associated protein 1	protein-coding
MEIS1_in_LV-MEIS1_peak_3805	chr3	184345893	184345893	+	23.9379	NA	TTS (NM_001171087)	TTS (NM_001171087)	8405	NM_144635	131408	Hs.591307	NM_144635	ENSG00000175182	FAM131A	C3orf40|FLAT715|PRO1378	family with sequence similarity 131 member A	protein-coding
MEIS1_in_LV-MEIS1_peak_4009	chr4	93870949	93870949	+	23.9379	NA	Intergenic	Intergenic	42022	NM_005172	474	Hs.532680	NM_005172	ENSG00000172238	ATOH1	ATH1|HATH1|MATH-1|bHLHa14	atonal bHLH transcription factor 1	protein-coding
MEIS1_in_LV-MEIS1_peak_125	chr1	52925756	52925756	+	23.9379	NA	Intergenic	Intergenic	-1473	NM_001193600	6342	Hs.476365	NM_002979	ENSG00000116171	SCP2	NLTP|NSL-TP|SCP-2|SCP-CHI|SCP-X|SCPX	sterol carrier protein 2	protein-coding
MEIS1_in_LV-MEIS1_peak_1979	chr15	35951350	35951350	+	23.9379	NA	Intergenic	Intergenic	24494	NR_039735	100616293		NR_039735	ENSG00000265098	MIR4510	mir-4510	microRNA 4510	ncRNA
MEIS1_in_LV-MEIS1_peak_1702	chr13	73608994	73608994	+	23.9379	NA	Intergenic	Intergenic	44750	NR_047009	100874155	Hs.672679	NR_047009		LINC00392	-	long intergenic non-protein coding RNA 392	ncRNA
MEIS1_in_LV-MEIS1_peak_5029	chr7	30778379	30778379	+	23.9379	NA	intron (NM_032222, intron 1 of 17)	intron (NM_032222, intron 1 of 17)	6962	NM_032222	84182	Hs.660192	NM_032222	ENSG00000106125	MINDY4	C7orf67|FAM188B	MINDY lysine 48 deubiquitinase 4	protein-coding
MEIS1_in_LV-MEIS1_peak_4822	chr6	126054472	126054472	+	23.9379	NA	Intergenic	Intergenic	68042	NM_001031712	60487	Hs.404186	NM_021820	ENSG00000066651	TRMT11	C6orf75|MDS024|TRM11|TRMT11-1	tRNA methyltransferase 11 homolog	protein-coding
MEIS1_in_LV-MEIS1_peak_4146	chr4	141350324	141350324	+	23.9379	NA	Intergenic	MER21C|LTR|ERVL	-17707	NR_121625	100507639	Hs.535010	NR_121625		LINC02432	-	long intergenic non-protein coding RNA 2432	ncRNA
MEIS1_in_LV-MEIS1_peak_5104	chr7	66114888	66114888	+	23.9379	NA	promoter-TSS (NM_001142414)	promoter-TSS (NM_001142414)	70	NM_001040647	27297	Hs.300684	NM_014478	ENSG00000241258	CRCP	CGRP-RCP|CGRPRCP|RCP|RCP9|RPC9	CGRP receptor component	protein-coding
MEIS1_in_LV-MEIS1_peak_4873	chr6	144287282	144287282	+	23.9379	NA	Intergenic	Intergenic	-4455	NM_007124	7402	Hs.133135	NM_007124	ENSG00000152818	UTRN	DMDL|DRP|DRP1	utrophin	protein-coding
MEIS1_in_LV-MEIS1_peak_3869	chr4	16044382	16044382	+	23.9379	NA	intron (NM_001145848, intron 2 of 26)	intron (NM_001145848, intron 2 of 26)	31736	NM_001145851	8842	Hs.614734	NM_006017	ENSG00000007062	PROM1	AC133|CD133|CORD12|MCDR2|MSTP061|PROML1|RP41|STGD4	prominin 1	protein-coding
MEIS1_in_LV-MEIS1_peak_2188	chr16	69424358	69424358	+	23.9379	NA	promoter-TSS (NM_030579)	promoter-TSS (NM_030579)	-237	NM_030579	80777	Hs.461131	NM_030579	ENSG00000103018	CYB5B	CYB5-M|CYPB5M|OMB5	cytochrome b5 type B	protein-coding
MEIS1_in_LV-MEIS1_peak_1715	chr13	81874529	81874529	+	23.9379	NA	Intergenic	L1PB4|LINE|L1	-647546	NR_047494	100861546	Hs.539621	NR_047494	ENSG00000260094	LINC00564	-	long intergenic non-protein coding RNA 564	ncRNA
MEIS1_in_LV-MEIS1_peak_2830	chr2	51342359	51342359	+	23.9379	NA	intron (NR_135237, intron 3 of 10)	intron (NR_135237, intron 3 of 10)	309758	NR_135237	730100	Hs.640140	NR_135237	ENSG00000231918	LOC730100	-	uncharacterized LOC730100	ncRNA
MEIS1_in_LV-MEIS1_peak_2665	chr19	39126792	39126792	+	23.9379	NA	intron (NM_001014834, intron 1 of 7)	MIRb|SINE|MIR	1012	NM_001014832	10298	Hs.20447	NM_005884	ENSG00000130669	PAK4	-	p21 (RAC1) activated kinase 4	protein-coding
MEIS1_in_LV-MEIS1_peak_2702	chr19	48872256	48872256	+	23.9379	NA	promoter-TSS (NM_014330)	promoter-TSS (NM_014330)	-136	NM_014330	23645	Hs.631593	NM_014330	ENSG00000087074	PPP1R15A	GADD34	protein phosphatase 1 regulatory subunit 15A	protein-coding
MEIS1_in_LV-MEIS1_peak_2587	chr19	12441136	12441136	+	23.9379	NA	promoter-TSS (NM_005815)	promoter-TSS (NM_005815)	-24	NM_005815	10224	Hs.636894	NM_005815	ENSG00000180855	ZNF443	ZK1	zinc finger protein 443	protein-coding
MEIS1_in_LV-MEIS1_peak_2139	chr16	35524260	35524260	+	23.9379	NA	Intergenic	LTR3B|LTR|ERVK	-17090	NR_034019	100130700	Hs.97712	NR_034018		TP53TG3HP	-	TP53 target 3 family member H, pseudogene	pseudo
MEIS1_in_LV-MEIS1_peak_4177	chr4	158157485	158157485	+	23.9379	NA	intron (NM_001128424, intron 2 of 4)	intron (NM_001128424, intron 2 of 4)	15081	NM_016613	51313	Hs.567498	NM_016613	ENSG00000164125	FAM198B	AD021|AD036|C4orf18|ENED	family with sequence similarity 198 member B	protein-coding
MEIS1_in_LV-MEIS1_peak_2802	chr2	34985721	34985721	+	23.9379	NA	Intergenic	Intergenic	308164	NR_126404	104355288	Hs.624529	NR_126404	ENSG00000228262	LINC01320	-	long intergenic non-protein coding RNA 1320	ncRNA
MEIS1_in_LV-MEIS1_peak_3067	chr2	209501747	209501747	+	23.9379	NA	intron (NM_001039538, intron 1 of 14)	intron (NM_001039538, intron 1 of 14)	77700	NM_001039538	4133	Hs.368281	NM_002374	ENSG00000078018	MAP2	MAP2A|MAP2B|MAP2C	microtubule associated protein 2	protein-coding
MEIS1_in_LV-MEIS1_peak_2807	chr2	36967770	36967770	+	23.9379	NA	Intergenic	Intergenic	-1298	NM_003162	6801	Hs.127486	NM_003162	ENSG00000115808	STRN	PPP2R6A|SG2NA|STRN1	striatin	protein-coding
MEIS1_in_LV-MEIS1_peak_5618	chr8	124854367	124854367	+	23.9379	NA	Intergenic	Intergenic	-32309	NR_039809	100616255		NR_039809	ENSG00000263735	MIR4662B	-	microRNA 4662b	ncRNA
MEIS1_in_LV-MEIS1_peak_4087	chr4	123588325	123588325	+	23.9379	NA	Intergenic	Intergenic	-64460	NR_027105	285419	Hs.535763	NR_027105	ENSG00000249464	LINC01091	-	long intergenic non-protein coding RNA 1091	ncRNA
MEIS1_in_LV-MEIS1_peak_5091	chr7	64794314	64794314	+	23.9365	NA	promoter-TSS (NM_001160183)	promoter-TSS (NM_001160183)	-74	NM_001160183	7697	Hs.184080	NM_006524	ENSG00000197008	ZNF138	pHZ-32	zinc finger protein 138	protein-coding
MEIS1_in_LV-MEIS1_peak_267	chr1	146370140	146370140	+	23.9188	NA	Intergenic	tRNA-Asn-AAC|tRNA|tRNA	-6667	NR_004427	26870		NR_004427	ENSG00000207005	RNU1-2	RNU1C1|RNU1C2|U1C1|U1C21	RNA, U1 small nuclear 2	snRNA
MEIS1_in_LV-MEIS1_peak_5298	chr7	115634818	115634818	+	23.8974	NA	Intergenic	Intergenic	333495	NM_001244583	22797	Hs.125962	NM_012252	ENSG00000105967	TFEC	TCFEC|TFE-C|TFEC-L|TFECL|bHLHe34|hTFEC-L	transcription factor EC	protein-coding
MEIS1_in_LV-MEIS1_peak_1267	chr12	48682405	48682405	+	23.8422	NA	promoter-TSS (NM_017822)	promoter-TSS (NM_017822)	-153	NM_017822	54934	Hs.505412	NM_017822	ENSG00000139620	KANSL2	C12orf41|NSL2	KAT8 regulatory NSL complex subunit 2	protein-coding
MEIS1_in_LV-MEIS1_peak_4175	chr4	157999910	157999910	+	23.8305	NA	Intergenic	L1ME4b|LINE|L1	172656	NM_016613	51313	Hs.567498	NM_016613	ENSG00000164125	FAM198B	AD021|AD036|C4orf18|ENED	family with sequence similarity 198 member B	protein-coding
MEIS1_in_LV-MEIS1_peak_5824	chr9	115495514	115495514	+	23.803	NA	Intergenic	Intergenic	248725	NR_109805	101928775	Hs.522362	NR_109805	ENSG00000228714	LOC101928775	-	uncharacterized LOC101928775	ncRNA
MEIS1_in_LV-MEIS1_peak_765	chr10	66626255	66626255	+	23.803	NA	intron (NM_001127384, intron 9 of 17)	intron (NM_001127384, intron 9 of 17)	-299779	NM_178011	347731	Hs.652155	NM_178011	ENSG00000198739	LRRTM3	-	leucine rich repeat transmembrane neuronal 3	protein-coding
MEIS1_in_LV-MEIS1_peak_4710	chr6	62523837	62523837	+	23.803	NA	Intergenic	L2a|LINE|L2	-237610	NM_152688	202559	Hs.519794	NM_152688	ENSG00000112232	KHDRBS2	SLM-1|SLM1	KH RNA binding domain containing, signal transduction associated 2	protein-coding
MEIS1_in_LV-MEIS1_peak_442	chr1	183070053	183070053	+	23.7102	NA	intron (NM_002293, intron 1 of 27)	intron (NM_002293, intron 1 of 27)	46593	NM_002293	3915	Hs.609663	NM_002293	ENSG00000135862	LAMC1	LAMB2	laminin subunit gamma 1	protein-coding
MEIS1_in_LV-MEIS1_peak_561	chr1	217526263	217526263	+	23.7041	NA	intron (NM_018040, intron 5 of 9)	intron (NM_018040, intron 5 of 9)	104839	NM_018040	55105	Hs.362343	NM_018040	ENSG00000092978	GPATCH2	CT110|GPATC2|PPP1R30|Pfa1	G-patch domain containing 2	protein-coding
MEIS1_in_LV-MEIS1_peak_1250	chr12	46386699	46386699	+	23.6924	NA	intron (NR_125381, intron 1 of 2)	intron (NR_125381, intron 1 of 2)	2592	NR_125381	100288798	Hs.525922	NR_125377		LOC100288798	-	uncharacterized LOC100288798	ncRNA
MEIS1_in_LV-MEIS1_peak_2573	chr19	11814186	11814186	+	23.6924	NA	promoter-TSS (NM_152357)	promoter-TSS (NM_152357)	-106	NM_152357	126070	Hs.418192	NM_152357	ENSG00000171295	ZNF440	-	zinc finger protein 440	protein-coding
MEIS1_in_LV-MEIS1_peak_3077	chr2	212227926	212227926	+	23.6586	NA	intron (NM_001042599, intron 1 of 26)	intron (NM_001042599, intron 1 of 26)	198434	NR_031643	100313771		NR_031643	ENSG00000221782	MIR548F2	MIR548F-2|MIRN548F2|hsa-mir-548f-2	microRNA 548f-2	ncRNA
MEIS1_in_LV-MEIS1_peak_35	chr1	16740228	16740228	+	23.6557	NA	promoter-TSS (NR_004408).3	promoter-TSS (NR_004408).3	-288	NR_004400	26863		NR_004400	ENSG00000206737	RNVU1-18	RNU1-25|RNU1-25P|RNU1-5|RNU1P1|RNU1P9|U1.15|U1P101|U1P15|vU1.18	RNA, variant U1 small nuclear 18	snRNA
MEIS1_in_LV-MEIS1_peak_1074	chr11	101963410	101963410	+	23.6294	NA	exon (NM_020802, exon 6 of 11)	exon (NM_020802, exon 6 of 11)	-46888	NM_178127	253935	Hs.318370	NM_178127	ENSG00000187151	ANGPTL5	-	angiopoietin like 5	protein-coding
MEIS1_in_LV-MEIS1_peak_4357	chr5	83085267	83085267	+	23.6294	NA	intron (NM_022550, intron 1 of 7)	intron (NM_022550, intron 1 of 7)	-7814	NM_174909	153339	Hs.355606	NM_174909	ENSG00000174695	TMEM167A	TMEM167	transmembrane protein 167A	protein-coding
MEIS1_in_LV-MEIS1_peak_1945	chr14	84622758	84622758	+	23.6288	NA	Intergenic	Intergenic	-764517	NR_135155	105370605		NR_135155	ENSG00000258814	LINC02329	-	long intergenic non-protein coding RNA 2329	ncRNA
MEIS1_in_LV-MEIS1_peak_374	chr1	163321901	163321901	+	23.5679	NA	promoter-TSS (NM_031423)	promoter-TSS (NM_031423)	-32	NM_145697	83540	Hs.651950	NM_031423	ENSG00000143228	NUF2	CDCA1|CT106|NUF2R	NUF2, NDC80 kinetochore complex component	protein-coding
MEIS1_in_LV-MEIS1_peak_296	chr1	149937547	149937547	+	23.5481	NA	promoter-TSS (NM_001145862)	promoter-TSS (NM_001145862)	-649	NM_001145862	10903	Hs.425144	NM_006697	ENSG00000014914	MTMR11	CRA	myotubularin related protein 11	protein-coding
MEIS1_in_LV-MEIS1_peak_4742	chr6	83008869	83008869	+	23.5327	NA	intron (NM_198920, intron 8 of 9)	intron (NM_198920, intron 8 of 9)	56972	NM_001304437	90025	Hs.148609	NM_198920	ENSG00000118420	UBE3D	C6orf157|H10BH|UBE2CBP|YJR141W	ubiquitin protein ligase E3D	protein-coding
MEIS1_in_LV-MEIS1_peak_5589	chr8	107437738	107437738	+	23.5327	NA	intron (NM_001199859, intron 1 of 8)	intron (NM_001199859, intron 1 of 8)	60317	NM_001146	284	Hs.369675	NM_001146	ENSG00000154188	ANGPT1	AGP1|AGPT|ANG1	angiopoietin 1	protein-coding
MEIS1_in_LV-MEIS1_peak_2140	chr16	35525030	35525030	+	23.5327	NA	Intergenic	L1MB2|LINE|L1	-17860	NR_034019	100130700	Hs.97712	NR_034018		TP53TG3HP	-	TP53 target 3 family member H, pseudogene	pseudo
MEIS1_in_LV-MEIS1_peak_3316	chr22	27936024	27936024	+	23.5327	NA	intron (NR_026963, intron 2 of 4)	Tigger2b_Pri|DNA|TcMar-Tigger	-15412	NR_036169	100423034		NR_036169	ENSG00000264073	MIR3199-1	mir-3199-1	microRNA 3199-1	ncRNA
MEIS1_in_LV-MEIS1_peak_2625	chr19	21141877	21141877	+	23.5327	NA	promoter-TSS (NM_001319124)	promoter-TSS (NM_001319124)	-133	NM_001319127	170959	Hs.156256	NM_133473	ENSG00000196705	ZNF431	-	zinc finger protein 431	protein-coding
MEIS1_in_LV-MEIS1_peak_3587	chr3	104612441	104612441	+	23.4633	NA	Intergenic	Intergenic	-754272	NM_001243280	214	Hs.591293	NM_001627	ENSG00000170017	ALCAM	CD166|MEMD	activated leukocyte cell adhesion molecule	protein-coding
MEIS1_in_LV-MEIS1_peak_791	chr10	75402615	75402615	+	23.4558	NA	promoter-TSS (NR_120651)	promoter-TSS (NR_120651)	-282	NR_110301	100131213	Hs.534598	NR_024421	ENSG00000237149	ZNF503-AS2	C10orf41|NCRNA00245	ZNF503 antisense RNA 2	ncRNA
MEIS1_in_LV-MEIS1_peak_626	chr1	234452706	234452706	+	23.4318	NA	intron (NM_005646, intron 9 of 29)	L1MC2|LINE|L1	26397	NM_005646	6894	Hs.498115	NM_005646	ENSG00000059588	TARBP1	TRM3|TRMT3|TRP-185|TRP185	TAR (HIV-1) RNA binding protein 1	protein-coding
MEIS1_in_LV-MEIS1_peak_1819	chr14	30842611	30842611	+	23.429	NA	Intergenic	Intergenic	-31924	NM_001135058	1690	Hs.21016	NM_004086	ENSG00000100473	COCH	COCH-5B2|COCH5B2|DFNA9	cochlin	protein-coding
MEIS1_in_LV-MEIS1_peak_4750	chr6	87669426	87669426	+	23.429	NA	Intergenic	Intergenic	32841	NM_018064	55122	Hs.485915	NM_018064	ENSG00000135334	AKIRIN2	C6orf166|FBI1|dJ486L4.2	akirin 2	protein-coding
MEIS1_in_LV-MEIS1_peak_5042	chr7	42093660	42093660	+	23.429	NA	intron (NM_000168, intron 3 of 14)	intron (NM_000168, intron 3 of 14)	143359	NM_000168	2737	Hs.21509	NM_000168	ENSG00000106571	GLI3	ACLS|GCPS|GLI3-190|GLI3FL|PAP-A|PAPA|PAPA1|PAPB|PHS|PPDIV	GLI family zinc finger 3	protein-coding
MEIS1_in_LV-MEIS1_peak_4596	chr6	9398195	9398195	+	23.429	NA	Intergenic	Intergenic	745986	NR_004855	728655	Hs.214343	NR_004855		HULC	HCCAT1|LINC00078|NCRNA00078	hepatocellular carcinoma up-regulated long non-coding RNA	ncRNA
MEIS1_in_LV-MEIS1_peak_4640	chr6	34536791	34536791	+	23.429	NA	Intergenic	Intergenic	19542	NM_001252294	25803	Hs.485158	NM_012391	ENSG00000124664	SPDEF	PDEF|bA375E1.3	SAM pointed domain containing ETS transcription factor	protein-coding
MEIS1_in_LV-MEIS1_peak_5406	chr8	430362	430362	+	23.429	NA	intron (NM_183421, intron 2 of 10)	intron (NM_183421, intron 2 of 10)	23554	NM_183420	26260	Hs.438454	NM_012173	ENSG00000147364	FBXO25	FBX25	F-box protein 25	protein-coding
MEIS1_in_LV-MEIS1_peak_2495	chr18	69322849	69322849	+	23.429	NA	Intergenic	L1ME2|LINE|L1	-78199	NM_152721	220164	Hs.278285	NM_152721	ENSG00000206052	DOK6	DOK5L|HsT3226	docking protein 6	protein-coding
MEIS1_in_LV-MEIS1_peak_5117	chr7	72622119	72622119	+	23.429	NA	intron (NM_001145440, intron 12 of 13)	Tigger16a|DNA|TcMar-Tigger	-75784	NR_039793	100616310		NR_039793	ENSG00000266525	MIR4650-1	-	microRNA 4650-1	ncRNA
MEIS1_in_LV-MEIS1_peak_2057	chr15	69468781	69468781	+	23.429	NA	Intergenic	Intergenic	15961	NM_213725	6176	Hs.356502	NM_001003	ENSG00000137818	RPLP1	LP1|P1|RPP1	ribosomal protein lateral stalk subunit P1	protein-coding
MEIS1_in_LV-MEIS1_peak_4122	chr4	138346198	138346198	+	23.4196	NA	intron (NR_051987, intron 1 of 2)	intron (NR_051987, intron 1 of 2)	36487	NR_051987	100874047	Hs.570848	NR_051987	ENSG00000251372	LINC00499	-	long intergenic non-protein coding RNA 499	ncRNA
MEIS1_in_LV-MEIS1_peak_5590	chr8	108939649	108939649	+	23.3989	NA	Intergenic	L1ME3|LINE|L1	-147775	NM_003301	7201	Hs.3022	NM_003301	ENSG00000174417	TRHR	TRH-R	thyrotropin releasing hormone receptor	protein-coding
MEIS1_in_LV-MEIS1_peak_5177	chr7	88746359	88746359	+	23.3989	NA	Intergenic	Intergenic	-13009	NM_181646	219578	Hs.684410	NM_181646	ENSG00000182348	ZNF804B	-	zinc finger protein 804B	protein-coding
MEIS1_in_LV-MEIS1_peak_5008	chr7	25855269	25855269	+	23.3745	NA	Intergenic	Intergenic	94717	NR_029597	406940		NR_029597	ENSG00000199085	MIR148A	MIRN148|MIRN148A|hsa-mir-148|mir-148a	microRNA 148a	ncRNA
MEIS1_in_LV-MEIS1_peak_1350	chr12	62312554	62312554	+	23.346	NA	intron (NM_001252078, intron 3 of 21)	intron (NM_001252078, intron 3 of 21)	52195	NR_106740	102465133		NR_106740	ENSG00000284360	MIR6125	hsa-mir-6125|mir-6125	microRNA 6125	ncRNA
MEIS1_in_LV-MEIS1_peak_2939	chr2	116341685	116341685	+	23.3421	NA	Intergenic	Intergenic	1179578	NM_001321909	57628	Hs.580539	NM_020868	ENSG00000175497	DPP10	DPL2|DPPY|DPRP-3|DPRP3	dipeptidyl peptidase like 10	protein-coding
MEIS1_in_LV-MEIS1_peak_3547	chr3	89686018	89686018	+	23.3404	NA	Intergenic	Intergenic	578494	NM_005233	2042	Hs.123642	NM_005233	ENSG00000044524	EPHA3	EK4|ETK|ETK1|HEK|HEK4|TYRO4	EPH receptor A3	protein-coding
MEIS1_in_LV-MEIS1_peak_5283	chr7	111750397	111750397	+	23.3027	NA	intron (NM_014705, intron 41 of 51)	LTR80A|LTR|ERVL	-58108	NR_103806	100506413	Hs.677513	NR_103806	ENSG00000225572	DOCK4-AS1	-	DOCK4 antisense RNA 1	ncRNA
MEIS1_in_LV-MEIS1_peak_4423	chr5	116274062	116274062	+	23.2922	NA	intron (NM_001308080, intron 5 of 6)	intron (NM_001308080, intron 5 of 6)	100508	NR_104675	101927190	Hs.639849	NR_104675		LOC101927190	-	uncharacterized LOC101927190	ncRNA
MEIS1_in_LV-MEIS1_peak_4987	chr7	20625254	20625254	+	23.2922	NA	intron (NM_001163941, intron 2 of 27)	intron (NM_001163941, intron 2 of 27)	9632	NM_001163941	340273	Hs.404102	NM_178559	ENSG00000004846	ABCB5	ABCB5alpha|ABCB5beta|EST422562	ATP binding cassette subfamily B member 5	protein-coding
MEIS1_in_LV-MEIS1_peak_4975	chr7	17559035	17559035	+	23.2922	NA	promoter-TSS (NR_110013)	promoter-TSS (NR_110013)	-126	NR_110013	101927630	Hs.583400	NR_110013	ENSG00000236039	LOC101927630	-	uncharacterized LOC101927630	ncRNA
MEIS1_in_LV-MEIS1_peak_1429	chr12	82319502	82319502	+	23.2922	NA	Intergenic	Intergenic	38918	NM_014167	29080	Hs.582627	NM_014167	ENSG00000133773	CCDC59	BR22|HSPC128|TAP26	coiled-coil domain containing 59	protein-coding
MEIS1_in_LV-MEIS1_peak_5337	chr7	123824896	123824896	+	23.2922	NA	Intergenic	L2a|LINE|L2	10757	NR_002731	26062	Hs.381305	NR_002731		HYALP1	HYAL6|HYAL6P	hyaluronoglucosaminidase pseudogene 1	pseudo
MEIS1_in_LV-MEIS1_peak_3022	chr2	190815416	190815416	+	23.2656	NA	Intergenic	Intergenic	-65405	NM_014905	2744	Hs.116448	NM_014905	ENSG00000115419	GLS	AAD20|GAC|GAM|GLS1|KGA	glutaminase	protein-coding
MEIS1_in_LV-MEIS1_peak_3741	chr3	167899576	167899576	+	23.265	NA	intron (NR_033843, intron 1 of 7)	intron (NR_033843, intron 1 of 7)	3628	NR_033843	646168	Hs.390443	NR_033843	ENSG00000244227	LRRC77P	LINC01330	leucine rich repeat containing 77, pseudogene	pseudo
MEIS1_in_LV-MEIS1_peak_5199	chr7	94453472	94453472	+	23.2545	NA	Intergenic	Intergenic	-56386	NM_022900	64921	Hs.260041	NM_022900	ENSG00000127995	CASD1	C7orf12|NBLA04196|SOAT	CAS1 domain containing 1	protein-coding
MEIS1_in_LV-MEIS1_peak_3733	chr3	164353096	164353096	+	23.2258	NA	Intergenic	Intergenic	-181540	NR_031665	100302148		NR_031665	ENSG00000221251	MIR1263	MIRN1263|hsa-mir-1263	microRNA 1263	ncRNA
MEIS1_in_LV-MEIS1_peak_642	chr1	236399657	236399657	+	23.2254	NA	intron (NM_080738, intron 1 of 5)	intron (NM_080738, intron 1 of 5)	4241	NM_080738	128178	Hs.352224	NM_080738	ENSG00000186197	EDARADD	ECTD11A|ECTD11B|ED3|EDA3	EDAR associated death domain	protein-coding
MEIS1_in_LV-MEIS1_peak_5158	chr7	82934480	82934480	+	23.213	NA	intron (NM_014510, intron 6 of 19)	intron (NM_014510, intron 6 of 19)	228401	NM_014510	27445	Hs.12376	NM_014510	ENSG00000186472	PCLO	ACZ|PCH3	piccolo presynaptic cytomatrix protein	protein-coding
MEIS1_in_LV-MEIS1_peak_4717	chr6	64785741	64785741	+	23.2072	NA	intron (NM_001292009, intron 22 of 43)	L2a|LINE|L2	-515677	NM_001271675	441155	Hs.546686	NM_001271675		LOC441155	-	zinc finger CCCH-type domain-containing-like	protein-coding
MEIS1_in_LV-MEIS1_peak_5570	chr8	94951531	94951531	+	23.1887	NA	Intergenic	Intergenic	-2144	NM_033285	94241	Hs.492261	NM_033285	ENSG00000164938	TP53INP1	SIP|TP53DINP1|TP53INP1A|TP53INP1B|Teap|p53DINP1	tumor protein p53 inducible nuclear protein 1	protein-coding
MEIS1_in_LV-MEIS1_peak_612	chr1	229768420	229768420	+	23.1476	NA	Intergenic	Intergenic	142204	NM_001314021	9816	Hs.533628	NM_014777	ENSG00000135763	URB2	KIAA0133|NET10|NPA2	URB2 ribosome biogenesis 2 homolog (S. cerevisiae)	protein-coding
MEIS1_in_LV-MEIS1_peak_4909	chr7	881589	881589	+	23.1436	NA	intron (NM_015949, intron 1 of 8)	intron (NM_015949, intron 1 of 8)	5035	NM_015949	51608	Hs.107387	NM_015949	ENSG00000239857	GET4	C7orf20|CEE|CGI-20|TRC35	golgi to ER traffic protein 4	protein-coding
MEIS1_in_LV-MEIS1_peak_4848	chr6	138469215	138469215	+	23.1436	NA	intron (NM_001144060, intron 3 of 7)	intron (NM_001144060, intron 3 of 7)	30227	NM_001144060	57224	Hs.652741	NM_020464	ENSG00000135540	NHSL1	C6orf63	NHS like 1	protein-coding
MEIS1_in_LV-MEIS1_peak_5314	chr7	117951919	117951919	+	23.1436	NA	Intergenic	Intergenic	-78412	NM_033427	83992	Hs.592285	NM_033427	ENSG00000077063	CTTNBP2	C7orf8|CORTBP2|Orf4	cortactin binding protein 2	protein-coding
MEIS1_in_LV-MEIS1_peak_4724	chr6	72261695	72261695	+	23.1436	NA	intron (NM_001168410, intron 14 of 21)	intron (NM_001168410, intron 14 of 21)	44935	NM_001168410	22999	Hs.485729	NM_014989	ENSG00000079841	RIMS1	CORD7|RAB3IP2|RIM|RIM1	regulating synaptic membrane exocytosis 1	protein-coding
MEIS1_in_LV-MEIS1_peak_693	chr10	9112656	9112656	+	23.1436	NA	Intergenic	Intergenic	-162957	NR_108039	100507163	Hs.649223	NR_108039		LINC00709	-	long intergenic non-protein coding RNA 709	ncRNA
MEIS1_in_LV-MEIS1_peak_1338	chr12	57693847	57693847	+	23.1436	NA	promoter-TSS (NM_006812)	promoter-TSS (NM_006812)	-108	NM_001261421	10956	Hs.527861	NM_006812	ENSG00000135506	OS9	ERLEC2|OS-9	OS9, endoplasmic reticulum lectin	protein-coding
MEIS1_in_LV-MEIS1_peak_1378	chr12	67299699	67299699	+	23.1436	NA	intron (NM_018448, intron 7 of 14)	intron (NM_018448, intron 7 of 14)	30418	NM_001329674	55832	Hs.546407	NM_018448	ENSG00000111530	CAND1	TIP120|TIP120A	cullin associated and neddylation dissociated 1	protein-coding
MEIS1_in_LV-MEIS1_peak_5559	chr8	85265906	85265906	+	23.1436	NA	intron (NM_198584, intron 3 of 6)	intron (NM_198584, intron 3 of 6)	20419	NM_198584	377677	Hs.127189	NM_198584	ENSG00000185015	CA13	CAXIII	carbonic anhydrase 13	protein-coding
MEIS1_in_LV-MEIS1_peak_5681	chr9	24712269	24712269	+	23.1436	NA	Intergenic	Intergenic	-166593	NM_001271706	100129669	Hs.573530	NM_001271706	ENSG00000205442	IZUMO3	C9orf134|bA20A20.1	IZUMO family member 3	protein-coding
MEIS1_in_LV-MEIS1_peak_2505	chr18	73043237	73043237	+	23.0926	NA	Intergenic	L2a|LINE|L2	174197	NR_134647	100505797	Hs.145111	NR_134647	ENSG00000263958	LOC100505797	-	myosin heavy chain IB-like	ncRNA
MEIS1_in_LV-MEIS1_peak_1260	chr12	47346835	47346835	+	23.0763	NA	Intergenic	MER5A|DNA|hAT-Charlie	17434	NR_039715	100616478		NR_039715	ENSG00000264906	MIR4494	-	microRNA 4494	ncRNA
MEIS1_in_LV-MEIS1_peak_5477	chr8	49078798	49078798	+	22.9837	NA	Intergenic	L2c|LINE|L2	6457	NM_001007176	492307	Hs.49890	NM_001007176	ENSG00000168333	PPDPFL	C8orf22	pancreatic progenitor cell differentiation and proliferation factor like	protein-coding
MEIS1_in_LV-MEIS1_peak_602	chr1	227563437	227563437	+	22.9588	NA	promoter-TSS (NM_178549)	promoter-TSS (NM_178549)	-82	NR_102302	339500	Hs.30323	NM_032755	ENSG00000181450	ZNF678	-	zinc finger protein 678	protein-coding
MEIS1_in_LV-MEIS1_peak_3562	chr3	100591598	100591598	+	22.9556	NA	Intergenic	Intergenic	-17991	NM_032787	84873	Hs.334511	NM_032787	ENSG00000144820	ADGRG7	GPR128	adhesion G protein-coupled receptor G7	protein-coding
MEIS1_in_LV-MEIS1_peak_691	chr10	8910444	8910444	+	22.8797	NA	intron (NR_131944, intron 2 of 3)	intron (NR_131944, intron 2 of 3)	12455	NR_131944	105755953	Hs.564146	NR_131944	ENSG00000234752	LOC105755953	-	uncharacterized LOC105755953	ncRNA
MEIS1_in_LV-MEIS1_peak_2896	chr2	85471121	85471121	+	22.8694	NA	Intergenic	Intergenic	52190	NM_201594	284948	Hs.209542	NM_198482	ENSG00000152292	SH2D6	-	SH2 domain containing 6	protein-coding
MEIS1_in_LV-MEIS1_peak_801	chr10	76282491	76282491	+	22.8694	NA	intron (NR_131178, intron 6 of 7)	intron (NR_131178, intron 6 of 7)	499730	NM_032024	83938	Hs.118161	NM_032024	ENSG00000148655	LRMDA	C10orf11|CDA017	leucine rich melanocyte differentiation associated	protein-coding
MEIS1_in_LV-MEIS1_peak_3177	chr20	36876012	36876012	+	22.8694	NA	promoter-TSS (NM_001304783)	promoter-TSS (NM_001304783)	-109	NM_080628	140711	Hs.472630	NM_080628	ENSG00000101342	TLDC2	C20orf118	TBC/LysM-associated domain containing 2	protein-coding
MEIS1_in_LV-MEIS1_peak_4352	chr5	79173968	79173968	+	22.8694	NA	Intergenic	Intergenic	-62134	NM_152405	133746	Hs.482605	NM_152405	ENSG00000152409	JMY	WHAMM2|WHDC1L3	junction mediating and regulatory protein, p53 cofactor	protein-coding
MEIS1_in_LV-MEIS1_peak_4614	chr6	18387400	18387400	+	22.8694	NA	promoter-TSS (NM_182757)	promoter-TSS (NM_182757)	50	NM_182757	255488	Hs.148741	NM_182757	ENSG00000137393	RNF144B	IBRDC2|PIR2|bA528A10.3|p53RFP	ring finger protein 144B	protein-coding
MEIS1_in_LV-MEIS1_peak_5561	chr8	86919740	86919740	+	22.8694	NA	intron (NM_173538, intron 3 of 10)	intron (NM_173538, intron 3 of 10)	53292	NM_173538	168975	Hs.246284	NM_173538	ENSG00000176571	CNBD1	-	cyclic nucleotide binding domain containing 1	protein-coding
MEIS1_in_LV-MEIS1_peak_1765	chr13	99677690	99677690	+	22.8694	NA	intron (NR_104592, intron 1 of 9)	intron (NR_104592, intron 1 of 9)	13281	NR_046526	100874063	Hs.577064	NR_046526	ENSG00000227659	CLYBL-AS2	-	CLYBL antisense RNA 2	ncRNA
MEIS1_in_LV-MEIS1_peak_4265	chr5	29380549	29380549	+	22.8694	NA	intron (NR_104628, intron 4 of 4)	intron (NR_104628, intron 4 of 4)	15427	NR_104628	101929681	Hs.549659	NR_104628		LINC02064	-	long intergenic non-protein coding RNA 2064	ncRNA
MEIS1_in_LV-MEIS1_peak_4325	chr5	61408890	61408890	+	22.8694	NA	intron (NM_020928, intron 1 of 13)	intron (NM_020928, intron 1 of 13)	76617	NM_020928	57688	Hs.744939	NM_020928	ENSG00000130449	ZSWIM6	AFND|NEDMAGA	zinc finger SWIM-type containing 6	protein-coding
MEIS1_in_LV-MEIS1_peak_2635	chr19	23395596	23395596	+	22.8694	NA	promoter-TSS (NM_001300951)	promoter-TSS (NM_001300951)	-36	NM_003430	7644	Hs.58834	NM_003430	ENSG00000167232	ZNF91	HPF7|HTF10	zinc finger protein 91	protein-coding
MEIS1_in_LV-MEIS1_peak_3175	chr20	35467760	35467760	+	22.8694	NA	intron (NM_001318219, intron 7 of 32)	intron (NM_001318219, intron 7 of 32)	7777	NM_001318219	11190	Hs.443976	NM_007186	ENSG00000126001	CEP250	C-NAP1|CEP2|CNAP1	centrosomal protein 250	protein-coding
MEIS1_in_LV-MEIS1_peak_2753	chr1_KI270765v1_alt	57402	57402	+	22.8694	NA	Intergenic	LTR4|LTR|ERV1	-46758	NM_001164261	645142	Hs.730589	NM_001164261	ENSG00000256374	PPIAL4D	-	peptidylprolyl isomerase A like 4D	protein-coding
MEIS1_in_LV-MEIS1_peak_5350	chr7	129825066	129825066	+	22.8694	NA	Intergenic	MLT1F2|LTR|ERVL-MaLR	-50052	NR_029615	406959		NR_029615	ENSG00000207691	MIR183	MIRN183|miR-183|miRNA183	microRNA 183	ncRNA
MEIS1_in_LV-MEIS1_peak_1986	chr15	39274066	39274066	+	22.8694	NA	Intergenic	Intergenic	23397	NM_207445	400360	Hs.376109	NM_207445	ENSG00000175746	C15orf54	-	chromosome 15 open reading frame 54 (putative)	ncRNA
MEIS1_in_LV-MEIS1_peak_2633	chr19	23116904	23116904	+	22.8694	NA	promoter-TSS (NM_001277403)	promoter-TSS (NM_001277403)	-71	NM_001277403	100129543	Hs.427120	NM_001277403	ENSG00000183850	ZNF730	-	zinc finger protein 730	protein-coding
MEIS1_in_LV-MEIS1_peak_158	chr1	78146484	78146484	+	22.8694	NA	Intergenic	Intergenic	-83115	NR_027310	149047	Hs.352665	NM_144700	ENSG00000237413	MGC27382	-	uncharacterized MGC27382	ncRNA
MEIS1_in_LV-MEIS1_peak_1268	chr12	48789627	48789627	+	22.8694	NA	promoter-TSS (NM_015270)	promoter-TSS (NM_015270)	51	NR_110020	100506125	Hs.306727	NR_110019	ENSG00000257660	LOC100506125	-	uncharacterized LOC100506125	ncRNA
MEIS1_in_LV-MEIS1_peak_2534	chr19	5904507	5904507	+	22.8694	NA	promoter-TSS (NM_001193375)	promoter-TSS (NM_001193375)	-334	NM_001017921	400673	Hs.620821	NM_001017921	ENSG00000187650	VMAC	-	vimentin type intermediate filament associated coiled-coil protein	protein-coding
MEIS1_in_LV-MEIS1_peak_3139	chr2	241093664	241093664	+	22.8694	NA	3' UTR (NM_001080437, exon 32 of 32)	3' UTR (NM_001080437, exon 32 of 32)	8668	NR_028050	130916	Hs.159556	NM_182501	ENSG00000122085	MTERF4	MTERFD2	mitochondrial transcription termination factor 4	protein-coding
MEIS1_in_LV-MEIS1_peak_2773	chr2	11132834	11132834	+	22.8694	NA	promoter-TSS (NR_040080)	promoter-TSS (NR_040080)	-219	NM_182500	130813	Hs.406894	NM_182500	ENSG00000150873	C2orf50	-	chromosome 2 open reading frame 50	protein-coding
MEIS1_in_LV-MEIS1_peak_1995	chr15	40430633	40430633	+	22.8694	NA	Intergenic	L2b|LINE|L2	-9088	NM_001301132	22893	Hs.22109	NM_014952	ENSG00000140320	BAHD1	-	bromo adjacent homology domain containing 1	protein-coding
MEIS1_in_LV-MEIS1_peak_2870	chr2	69685868	69685868	+	22.8694	NA	intron (NM_001320698, intron 2 of 14)	MER63B|DNA|hAT-Blackjack	-42023	NM_014911	22848	Hs.468878	NM_014911	ENSG00000115977	AAK1	-	AP2 associated kinase 1	protein-coding
MEIS1_in_LV-MEIS1_peak_2351	chr17	63622050	63622050	+	22.8248	NA	promoter-TSS (NM_002401)	promoter-TSS (NM_002401)	-375	NM_001330431	4215	Hs.29282	NM_002401	ENSG00000198909	MAP3K3	MAPKKK3|MEKK3	mitogen-activated protein kinase kinase kinase 3	protein-coding
MEIS1_in_LV-MEIS1_peak_2804	chr2	35614946	35614946	+	22.8248	NA	Intergenic	L1MEg|LINE|L1	143541	NR_039629	100616475		NR_039629	ENSG00000265301	MIR548AD	-	microRNA 548ad	ncRNA
MEIS1_in_LV-MEIS1_peak_4433	chr5	117645635	117645635	+	22.8161	NA	Intergenic	L1ME1|LINE|L1	-84726	NR_104997	102467224	Hs.134230	NR_104997		LINC02147	-	long intergenic non-protein coding RNA 2147	ncRNA
MEIS1_in_LV-MEIS1_peak_1821	chr14	32134801	32134801	+	22.8161	NA	intron (NM_001173, intron 3 of 6)	intron (NM_001173, intron 3 of 6)	57512	NM_001030055	394	Hs.592313	NM_001173	ENSG00000100852	ARHGAP5	GFI2|RhoGAP5|p190-B|p190BRhoGAP	Rho GTPase activating protein 5	protein-coding
MEIS1_in_LV-MEIS1_peak_119	chr1	50960332	50960332	+	22.7958	NA	promoter-TSS (NM_007051)	promoter-TSS (NM_007051)	-68	NM_007051	11124	Hs.530402	NM_007051	ENSG00000185104	FAF1	CGI-03|HFAF1s|UBXD12|UBXN3A|hFAF1	Fas associated factor 1	protein-coding
MEIS1_in_LV-MEIS1_peak_560	chr1	217516745	217516745	+	22.7834	NA	intron (NM_018040, intron 5 of 9)	intron (NM_018040, intron 5 of 9)	114357	NM_018040	55105	Hs.362343	NM_018040	ENSG00000092978	GPATCH2	CT110|GPATC2|PPP1R30|Pfa1	G-patch domain containing 2	protein-coding
MEIS1_in_LV-MEIS1_peak_3688	chr3	149369375	149369375	+	22.6697	NA	3' UTR (NM_014220, exon 5 of 5)	3' UTR (NM_014220, exon 5 of 5)	-8403	NR_109810	100874091	Hs.549633	NR_046650	ENSG00000240541	TM4SF1-AS1	-	TM4SF1 antisense RNA 1	ncRNA
MEIS1_in_LV-MEIS1_peak_1763	chr13	98984347	98984347	+	22.6356	NA	intron (NM_001130049, intron 1 of 32)	intron (NM_001130049, intron 1 of 32)	-6263	NM_001130048	23348	Hs.596105	NM_015296	ENSG00000088387	DOCK9	ZIZ1|ZIZIMIN1	dedicator of cytokinesis 9	protein-coding
MEIS1_in_LV-MEIS1_peak_4926	chr7	4189237	4189237	+	22.6356	NA	intron (NM_001079653, intron 9 of 19)	intron (NM_001079653, intron 9 of 19)	59552	NM_001079653	221935	Hs.653013	NM_152744	ENSG00000146555	SDK1	-	sidekick cell adhesion molecule 1	protein-coding
MEIS1_in_LV-MEIS1_peak_4923	chr7	3710692	3710692	+	22.5952	NA	intron (NM_152744, intron 4 of 44)	intron (NM_152744, intron 4 of 44)	409244	NM_152744	221935	Hs.653013	NM_152744	ENSG00000146555	SDK1	-	sidekick cell adhesion molecule 1	protein-coding
MEIS1_in_LV-MEIS1_peak_3173	chr20	34876253	34876253	+	22.5952	NA	promoter-TSS (NM_001076552)	promoter-TSS (NM_001076552)	-272	NM_018677	55902	Hs.517034	NM_018677	ENSG00000131069	ACSS2	ACAS2|ACECS|ACS|ACSA|dJ1161H23.1	acyl-CoA synthetase short chain family member 2	protein-coding
MEIS1_in_LV-MEIS1_peak_259	chr1	145885855	145885855	+	22.5887	NA	promoter-TSS (NM_001280799)	promoter-TSS (NM_001280799)	11	NM_144698	148741	Hs.710624	NM_144698	ENSG00000198483	ANKRD35	-	ankyrin repeat domain 35	protein-coding
MEIS1_in_LV-MEIS1_peak_5828	chr9	119868877	119868877	+	22.5699	NA	Intergenic	Intergenic	-66183	NR_132393	106146149	Hs.638938	NR_132393	ENSG00000261432	LINC01613	n341773	long intergenic non-protein coding RNA 1613	ncRNA
MEIS1_in_LV-MEIS1_peak_464	chr1	189774908	189774908	+	22.5592	NA	Intergenic	Intergenic	701102	NM_001317188	339479	Hs.65765	NM_199051	ENSG00000162670	BRINP3	DBCCR1L|DBCCR1L1|FAM5C	BMP/retinoic acid inducible neural specific 3	protein-coding
MEIS1_in_LV-MEIS1_peak_2766	chr2	8678958	8678958	+	22.5592	NA	TTS (NR_110153)	TTS (NR_110153)	2903	NR_110153	100506299	Hs.439031	NR_110153	ENSG00000235092	ID2-AS1	-	ID2 antisense RNA 1	ncRNA
MEIS1_in_LV-MEIS1_peak_5159	chr7	82945278	82945278	+	22.5388	NA	intron (NM_014510, intron 6 of 19)	intron (NM_014510, intron 6 of 19)	217603	NM_014510	27445	Hs.12376	NM_014510	ENSG00000186472	PCLO	ACZ|PCH3	piccolo presynaptic cytomatrix protein	protein-coding
MEIS1_in_LV-MEIS1_peak_403	chr1	174405375	174405375	+	22.5064	NA	intron (NM_014857, intron 13 of 20)	intron (NM_014857, intron 13 of 20)	-42699	NM_005684	9293	Hs.673850	NM_005684	ENSG00000203737	GPR52	-	G protein-coupled receptor 52	protein-coding
MEIS1_in_LV-MEIS1_peak_2583	chr19	12294926	12294926	+	22.4961	NA	promoter-TSS (NM_001164276)	promoter-TSS (NM_001164276)	-27	NM_016264	51710	Hs.296731	NM_016264	ENSG00000197857	ZNF44	GIOT-2|KOX7|ZNF|ZNF504|ZNF55|ZNF58	zinc finger protein 44	protein-coding
MEIS1_in_LV-MEIS1_peak_3663	chr3	141558179	141558179	+	22.4821	NA	intron (NM_006506, intron 7 of 23)	MIRc|SINE|MIR	71132	NM_006506	5922	Hs.98445	NM_006506	ENSG00000155903	RASA2	GAP1M	RAS p21 protein activator 2	protein-coding
MEIS1_in_LV-MEIS1_peak_613	chr1	229844176	229844176	+	22.464	NA	Intergenic	Intergenic	-158541	NR_135116	101927532	Hs.40183	NR_135116	ENSG00000228058	LINC01736	-	long intergenic non-protein coding RNA 1736	ncRNA
MEIS1_in_LV-MEIS1_peak_5529	chr8	79300256	79300256	+	22.4617	NA	Intergenic	Intergenic	-310558	NM_007029	11075	Hs.521651	NM_007029	ENSG00000104435	STMN2	SCG10|SCGN10	stathmin 2	protein-coding
MEIS1_in_LV-MEIS1_peak_3722	chr3	159627819	159627819	+	22.4011	NA	intron (NM_001197108, intron 1 of 6)	L1MEg|LINE|L1	140793	NR_121669	100874433	Hs.601476	NR_121669		IQCJ-SCHIP1-AS1	uaz98	IQCJ-SCHIP1 readthrough antisense RNA 1	ncRNA
MEIS1_in_LV-MEIS1_peak_818	chr10	88386424	88386424	+	22.3762	NA	intron (NM_001031709, intron 4 of 6)	intron (NM_001031709, intron 4 of 6)	196901	NM_001031709	55328	Hs.149849	NM_018363	ENSG00000184719	RNLS	C10orf59|RENALASE	renalase, FAD dependent amine oxidase	protein-coding
MEIS1_in_LV-MEIS1_peak_5833	chr9	121450461	121450461	+	22.3762	NA	Intergenic	Intergenic	49566	NR_003191	2681	Hs.97469	NR_003191	ENSG00000204136	GGTA1P	GGTA|GGTA1|GLYT2|a1/3GTP	glycoprotein, alpha-galactosyltransferase 1 pseudogene	pseudo
MEIS1_in_LV-MEIS1_peak_2406	chr18	3451477	3451477	+	22.3762	NA	promoter-TSS (NM_173210)	promoter-TSS (NM_173210)	72	NM_173210	7050	Hs.373550	NM_003244	ENSG00000177426	TGIF1	HPE4|TGIF	TGFB induced factor homeobox 1	protein-coding
MEIS1_in_LV-MEIS1_peak_5491	chr8	58057797	58057797	+	22.3762	NA	intron (NM_147189, intron 3 of 4)	MIR|SINE|MIR	63243	NM_147189	90362	Hs.154652	NM_147189	ENSG00000169122	FAM110B	C8orf72	family with sequence similarity 110 member B	protein-coding
MEIS1_in_LV-MEIS1_peak_696	chr10	13681305	13681305	+	22.3762	NA	intron (NM_018027, intron 15 of 24)	intron (NM_018027, intron 15 of 24)	26262	NM_001318338	55691	Hs.330463	NM_018027	ENSG00000151474	FRMD4A	CCAFCA|FRMD4|bA295P9.4	FERM domain containing 4A	protein-coding
MEIS1_in_LV-MEIS1_peak_4118	chr4	134629251	134629251	+	22.3762	NA	Intergenic	Intergenic	-427503	NM_001114734	132430	Hs.49889	NM_001114734	ENSG00000254535	PABPC4L	-	poly(A) binding protein cytoplasmic 4 like	protein-coding
MEIS1_in_LV-MEIS1_peak_5919	chrX	69959650	69959650	+	22.3762	NA	intron (NM_001005609, intron 2 of 7)	L2a|LINE|L2	-63207	NR_037494	100500887		NR_037494	ENSG00000211991	MIR676	hsa-mir-676|mir-676	microRNA 676	ncRNA
MEIS1_in_LV-MEIS1_peak_2962	chr2	150208231	150208231	+	22.3762	NA	Intergenic	Intergenic	279464	NM_001254738	390	Hs.6838	NM_005168	ENSG00000115963	RND3	ARHE|Rho8|RhoE|memB	Rho family GTPase 3	protein-coding
MEIS1_in_LV-MEIS1_peak_764	chr10	65891357	65891357	+	22.3762	NA	Intergenic	Intergenic	319932	NR_120647	101928913	Hs.568857	NR_120647		LINC01515	-	long intergenic non-protein coding RNA 1515	ncRNA
MEIS1_in_LV-MEIS1_peak_5443	chr8	27596125	27596125	+	22.3762	NA	TTS (NM_001831)	TTS (NM_001831)	14626	NR_106902	102465508		NR_106902	ENSG00000284280	MIR6843	hsa-mir-6843	microRNA 6843	ncRNA
MEIS1_in_LV-MEIS1_peak_1046	chr11	86988508	86988508	+	22.3762	NA	intron (NR_038905, intron 2 of 2)	intron (NR_038905, intron 2 of 2)	32887	NR_038905	100506368	Hs.559920	NR_038905	ENSG00000246523	LOC100506368	-	uncharacterized LOC100506368	ncRNA
MEIS1_in_LV-MEIS1_peak_4257	chr5	23727438	23727438	+	22.3762	NA	Intergenic	Intergenic	219783	NM_001310214	56979	Hs.283096	NM_020227	ENSG00000164256	PRDM9	KMT8B|MEISETZ|MSBP3|PFM6|ZNF899	PR/SET domain 9	protein-coding
MEIS1_in_LV-MEIS1_peak_3019	chr2	190270369	190270369	+	22.3762	NA	intron (NM_198047, intron 6 of 12)	intron (NM_198047, intron 6 of 12)	49676	NM_198047	26275	Hs.656685	NM_014362	ENSG00000198130	HIBCH	HIBYLCOAH	3-hydroxyisobutyryl-CoA hydrolase	protein-coding
MEIS1_in_LV-MEIS1_peak_3933	chr4	68670732	68670732	+	22.3762	NA	promoter-TSS (NM_001076)	promoter-TSS (NM_001076)	44	NM_001076	7366	Hs.150207	NM_001076	ENSG00000196620	UGT2B15	HLUG4|UDPGT 2B8|UDPGT2B15|UDPGTH3|UGT2B8	UDP glucuronosyltransferase family 2 member B15	protein-coding
MEIS1_in_LV-MEIS1_peak_319	chr1	152034822	152034822	+	22.3755	NA	intron (NM_005620, intron 1 of 2)	intron (NM_005620, intron 1 of 2)	2213	NM_005620	6282	Hs.417004	NM_005620	ENSG00000163191	S100A11	HEL-S-43|MLN70|S100C	S100 calcium binding protein A11	protein-coding
MEIS1_in_LV-MEIS1_peak_494	chr1	201170623	201170623	+	22.3755	NA	intron (NM_001288564, intron 1 of 5)	L2b|LINE|L2	959	NM_001288564	252839	Hs.181444	NM_016456	ENSG00000116857	TMEM9	DERM4|TMEM9A	transmembrane protein 9	protein-coding
MEIS1_in_LV-MEIS1_peak_3767	chr3	174126328	174126328	+	22.3755	NA	intron (NM_014932, intron 4 of 6)	MIRb|SINE|MIR	-205532	NR_046664	100874010	Hs.624265	NR_046664	ENSG00000228213	NLGN1-AS1	-	NLGN1 antisense RNA 1	ncRNA
MEIS1_in_LV-MEIS1_peak_4767	chr6	94971185	94971185	+	22.3755	NA	Intergenic	Tigger2|DNA|TcMar-Tigger	606266	NR_047502	101927288	Hs.616643	NR_047502	ENSG00000261366	MANEA-DT	MANEA-AS1	MANEA divergent transcript	ncRNA
MEIS1_in_LV-MEIS1_peak_5296	chr7	115133700	115133700	+	22.3755	NA	intron (NR_126407, intron 2 of 4)	intron (NR_126407, intron 2 of 4)	54742	NR_120521	102724386	Hs.352357	NR_120521	ENSG00000225535	LINC01393	-	long intergenic non-protein coding RNA 1393	ncRNA
MEIS1_in_LV-MEIS1_peak_5303	chr7	116810569	116810569	+	22.3755	NA	Intergenic	Intergenic	-51940	NM_006136	830	Hs.446123	NM_006136	ENSG00000198898	CAPZA2	CAPPA2|CAPZ	capping actin protein of muscle Z-line subunit alpha 2	protein-coding
MEIS1_in_LV-MEIS1_peak_5677	chr9	20566506	20566506	+	22.3755	NA	intron (NM_001286691, intron 2 of 10)	intron (NM_001286691, intron 2 of 10)	55481	NM_001286691	4300	Hs.317248	NM_004529	ENSG00000171843	MLLT3	AF9|YEATS3	MLLT3, super elongation complex subunit	protein-coding
MEIS1_in_LV-MEIS1_peak_499	chr1	201598039	201598039	+	22.3755	NA	Intergenic	L2c|LINE|L2	-50283	NM_020443	89796	Hs.585374	NM_020443	ENSG00000134369	NAV1	POMFIL3|STEERIN1|UNC53H1	neuron navigator 1	protein-coding
MEIS1_in_LV-MEIS1_peak_3877	chr4	28093303	28093303	+	22.3203	NA	Intergenic	Intergenic	-726279	NR_036237	100422937		NR_036237	ENSG00000283275	MIR4275	-	microRNA 4275	ncRNA
MEIS1_in_LV-MEIS1_peak_5292	chr7	114150911	114150911	+	22.1968	NA	intron (NR_033766, intron 1 of 19)	intron (NR_033766, intron 1 of 19)	64601	NR_033766	93986	Hs.282787	NM_014491	ENSG00000128573	FOXP2	CAGH44|SPCH1|TNRC10	forkhead box P2	protein-coding
MEIS1_in_LV-MEIS1_peak_659	chr1	246608942	246608942	+	22.1691	NA	intron (NM_152609, intron 2 of 10)	intron (NM_152609, intron 2 of 10)	42605	NM_001139459	163882	Hs.368353	NM_152609	ENSG00000162852	CNST	C1orf71|PPP1R64	consortin, connexin sorting protein	protein-coding
MEIS1_in_LV-MEIS1_peak_3568	chr3	101779146	101779146	+	22.1691	NA	promoter-TSS (NM_145037)	promoter-TSS (NM_145037)	-39	NM_145037	91775	Hs.595933	NM_145037	ENSG00000144815	NXPE3	FAM55C|MST115|MSTP115	neurexophilin and PC-esterase domain family member 3	protein-coding
MEIS1_in_LV-MEIS1_peak_2123	chr16	29608946	29608946	+	22.1691	NA	intron (NR_135317, intron 1 of 11)	LTR22B|LTR|ERVK	4771	NR_135317	440354	Hs.552700	NR_002473		SMG1P2	-	SMG1 pseudogene 2	pseudo
MEIS1_in_LV-MEIS1_peak_1420	chr12	78409153	78409153	+	22.1252	NA	Intergenic	L2c|LINE|L2	-49407	NR_135021	105369860	Hs.156898	NR_135021	ENSG00000258220	LINC02424	-	long intergenic non-protein coding RNA 2424	ncRNA
MEIS1_in_LV-MEIS1_peak_2751	chr1_KI270713v1_random	22308	22308	+	22.0492	NA	promoter-TSS (NR_004408).4	promoter-TSS (NR_004408).4	-284	NR_004421	6060		NR_004421	ENSG00000207389	RNU1-4	HSD2|HSD5|HSD6|HSD7|RNU1|RNU1D2|RNU1E2|RNU1F1|RNU1G1|RNU1G2|U1B2|U1D2|U1E2|U1F	RNA, U1 small nuclear 4	snRNA
MEIS1_in_LV-MEIS1_peak_253	chr1	145182831	145182831	+	22.005	NA	intron (NR_111958, intron 1 of 2)	MER66C|LTR|ERV1	33240	NR_111955	103091866	Hs.662922	NR_111954	ENSG00000272419	LOC103091866	-	uncharacterized LOC103091866	ncRNA
MEIS1_in_LV-MEIS1_peak_4989	chr7	21128549	21128549	+	22.0046	NA	Intergenic	Intergenic	293118	NR_126381	104355138	Hs.650722	NR_126381	ENSG00000232790	LINC01162	-	long intergenic non-protein coding RNA 1162	ncRNA
MEIS1_in_LV-MEIS1_peak_2411	chr18	9683271	9683271	+	21.9702	NA	Intergenic	L1MEc|LINE|L1	-24960	NM_006868	11031	Hs.99528	NM_006868	ENSG00000168461	RAB31	Rab22B	RAB31, member RAS oncogene family	protein-coding
MEIS1_in_LV-MEIS1_peak_451	chr1	184792677	184792677	+	21.9702	NA	3' UTR (NM_052966, exon 14 of 14)	3' UTR (NM_052966, exon 14 of 14)	-37770	NM_025191	80267	Hs.523811	NM_025191	ENSG00000116406	EDEM3	C1orf22	ER degradation enhancing alpha-mannosidase like protein 3	protein-coding
MEIS1_in_LV-MEIS1_peak_4094	chr4	124329326	124329326	+	21.9702	NA	Intergenic	Intergenic	229108	NR_110838	101927087	Hs.518966	NR_110838	ENSG00000261083	LINC02516	-	long intergenic non-protein coding RNA 2516	ncRNA
MEIS1_in_LV-MEIS1_peak_1151	chr12	6608503	6608503	+	21.9611	NA	Intergenic	Intergenic	-1070	NM_001273	1108	Hs.162233	NM_001273	ENSG00000111642	CHD4	CHD-4|Mi-2b|Mi2-BETA|SIHIWES	chromodomain helicase DNA binding protein 4	protein-coding
MEIS1_in_LV-MEIS1_peak_5078	chr7	54987987	54987987	+	21.955	NA	Intergenic	L2c|LINE|L2	-31034	NM_005228	1956	Hs.488293	NM_005228	ENSG00000146648	EGFR	ERBB|ERBB1|HER1|NISBD2|PIG61|mENA	epidermal growth factor receptor	protein-coding
MEIS1_in_LV-MEIS1_peak_5287	chr7	112572884	112572884	+	21.9371	NA	Intergenic	Intergenic	-45181	NR_110160	100996249	Hs.561749	NR_110159		LOC100996249	-	uncharacterized LOC100996249	ncRNA
MEIS1_in_LV-MEIS1_peak_5183	chr7	90706392	90706392	+	21.9349	NA	intron (NM_001287135, intron 2 of 14)	intron (NM_001287135, intron 2 of 14)	-3006	NM_012395	5218	Hs.258576	NM_012395	ENSG00000058091	CDK14	PFTAIRE1|PFTK1	cyclin dependent kinase 14	protein-coding
MEIS1_in_LV-MEIS1_peak_5746	chr9	73515503	73515503	+	21.9349	NA	Intergenic	CR1-16_AMi|LINE|CR1	363772	NM_000700	301	Hs.494173	NM_000700	ENSG00000135046	ANXA1	ANX1|LPC1	annexin A1	protein-coding
MEIS1_in_LV-MEIS1_peak_5551	chr8	84316544	84316544	+	21.9349	NA	intron (NM_001100391, intron 1 of 8)	intron (NM_001100391, intron 1 of 8)	131679	NM_001100391	138046	Hs.121663	NM_173848	ENSG00000184672	RALYL	HNRPCL3	RALY RNA binding protein like	protein-coding
MEIS1_in_LV-MEIS1_peak_2792	chr2	24540330	24540330	+	21.9349	NA	Intergenic	L1MEi|LINE|L1	-44147	NM_003743	8648	Hs.596314	NM_003743	ENSG00000084676	NCOA1	F-SRC-1|KAT13A|RIP160|SRC1|bHLHe42|bHLHe74	nuclear receptor coactivator 1	protein-coding
MEIS1_in_LV-MEIS1_peak_3538	chr3	89474679	89474679	+	21.9349	NA	intron (NM_005233, intron 16 of 16)	intron (NM_005233, intron 16 of 16)	367155	NM_005233	2042	Hs.123642	NM_005233	ENSG00000044524	EPHA3	EK4|ETK|ETK1|HEK|HEK4|TYRO4	EPH receptor A3	protein-coding
MEIS1_in_LV-MEIS1_peak_5065	chr7	46932683	46932683	+	21.9349	NA	Intergenic	Intergenic	-235561	NR_134575	730338	Hs.640207	NR_134575	ENSG00000233539	LOC730338	-	uncharacterized LOC730338	ncRNA
MEIS1_in_LV-MEIS1_peak_3884	chr4	30192103	30192103	+	21.9124	NA	Intergenic	Intergenic	-528305	NM_032456	5099	Hs.479439	NM_002589	ENSG00000169851	PCDH7	BH-Pcdh|BHPCDH|PPP1R120	protocadherin 7	protein-coding
MEIS1_in_LV-MEIS1_peak_570	chr1	220046674	220046674	+	21.8905	NA	promoter-TSS (NM_004446)	promoter-TSS (NM_004446)	-16	NM_004446	2058	Hs.497788	NM_004446	ENSG00000136628	EPRS	EARS|GLUPRORS|PARS|PIG32|QARS|QPRS	glutamyl-prolyl-tRNA synthetase	protein-coding
MEIS1_in_LV-MEIS1_peak_4758	chr6	92337710	92337710	+	21.8774	NA	Intergenic	Intergenic	-647282	NR_104154	101929083	Hs.586238	NR_104154		CASC6	-	cancer susceptibility 6 (non-protein coding)	ncRNA
MEIS1_in_LV-MEIS1_peak_5169	chr7	85259167	85259167	+	21.8605	NA	Intergenic	L2a|LINE|L2	-137236	NM_152754	223117	Hs.201340	NM_152754	ENSG00000153993	SEMA3D	Sema-Z2|coll-2	semaphorin 3D	protein-coding
MEIS1_in_LV-MEIS1_peak_4522	chr5	144032591	144032591	+	21.8187	NA	Intergenic	Intergenic	138123	NM_001271732	81555	Hs.372050	NM_030799	ENSG00000145817	YIPF5	FinGER5|SB140|SMAP-5|SMAP5|YIP1A	Yip1 domain family member 5	protein-coding
MEIS1_in_LV-MEIS1_peak_3261	chr21	30408906	30408906	+	21.8118	NA	Intergenic	L1PA16|LINE|L1	12832	NM_181599	140258	Hs.407653	NM_181599	ENSG00000198390	KRTAP13-1	KAP13.1|KRTAP13.1	keratin associated protein 13-1	protein-coding
MEIS1_in_LV-MEIS1_peak_114	chr1	46643518	46643518	+	21.8118	NA	intron (NM_022745, intron 7 of 8)	intron (NM_022745, intron 7 of 8)	22360	NM_001256418	64756	Hs.100874	NM_022745	ENSG00000123472	ATPAF1	ATP11|ATP11p	ATP synthase mitochondrial F1 complex assembly factor 1	protein-coding
MEIS1_in_LV-MEIS1_peak_2470	chr18	50623035	50623035	+	21.8118	NA	intron (NM_001292039, intron 1 of 4)	intron (NM_001292039, intron 1 of 4)	62921	NM_001292040	5596	Hs.433728	NM_002747	ENSG00000141639	MAPK4	ERK-4|ERK4|PRKM4|p63-MAPK|p63MAPK	mitogen-activated protein kinase 4	protein-coding
MEIS1_in_LV-MEIS1_peak_3116	chr2	227053049	227053049	+	21.8118	NA	intron (NM_000092, intron 31 of 47)	MER63A|DNA|hAT-Blackjack	111510	NM_000092	1286	Hs.591645	NM_000092	ENSG00000081052	COL4A4	CA44	collagen type IV alpha 4 chain	protein-coding
MEIS1_in_LV-MEIS1_peak_5448	chr8	28146255	28146255	+	21.8118	NA	intron (NM_018091, intron 10 of 14)	intron (NM_018091, intron 10 of 14)	53188	NM_001284224	55140	Hs.491336	NM_018091	ENSG00000134014	ELP3	KAT9	elongator acetyltransferase complex subunit 3	protein-coding
MEIS1_in_LV-MEIS1_peak_5762	chr9	82367291	82367291	+	21.8118	NA	Intergenic	Intergenic	378519	NM_001001670	389763	Hs.209545	NM_001001670	ENSG00000214929	SPATA31D1	FAM75D1	SPATA31 subfamily D member 1	protein-coding
MEIS1_in_LV-MEIS1_peak_4665	chr6	43687897	43687897	+	21.8118	NA	promoter-TSS (NM_001193343)	promoter-TSS (NM_001193343)	-85	NM_018135	55168	Hs.520149	NM_018135	ENSG00000096080	MRPS18A	HumanS18b|MRP-S18-3|MRPS18-3|S18bmt	mitochondrial ribosomal protein S18A	protein-coding
MEIS1_in_LV-MEIS1_peak_1794	chr14	20609616	20609616	+	21.8118	NA	Intergenic	Intergenic	-18793	NM_001024822	493901	Hs.729466	NM_001024822	ENSG00000258436	RNASE12	HEL-S-85p|RAI1	ribonuclease A family member 12 (inactive)	protein-coding
MEIS1_in_LV-MEIS1_peak_2887	chr2	78993072	78993072	+	21.8118	NA	Intergenic	CpG	-32614	NM_198448	130120	Hs.447084	NM_198448	ENSG00000143954	REG3G	LPPM429|PAP IB|PAP-1B|PAP1B|PAPIB|REG III|REG-III|UNQ429	regenerating family member 3 gamma	protein-coding
MEIS1_in_LV-MEIS1_peak_4566	chr5	171908869	171908869	+	21.8118	NA	intron (NM_033645, intron 2 of 11)	intron (NM_033645, intron 2 of 11)	98004	NM_033644	23291	Hs.484138	NM_012300	ENSG00000072803	FBXW11	BTRC2|BTRCP2|FBW1B|FBXW1B|Fbw11|Hos	F-box and WD repeat domain containing 11	protein-coding
MEIS1_in_LV-MEIS1_peak_987	chr11	64230437	64230437	+	21.8118	NA	promoter-TSS (NM_001307980)	promoter-TSS (NM_001307980)	5	NM_001307981	3338	Hs.172847	NM_005528	ENSG00000110011	DNAJC4	DANJC4|HSPF2|MCG18	DnaJ heat shock protein family (Hsp40) member C4	protein-coding
MEIS1_in_LV-MEIS1_peak_767	chr10	66983633	66983633	+	21.8118	NA	non-coding (NR_111911, exon 2 of 7)	non-coding (NR_111911, exon 2 of 7)	28520	NR_111911	101928961	Hs.687014	NR_111911		LOC101928961	-	uncharacterized LOC101928961	ncRNA
MEIS1_in_LV-MEIS1_peak_1919	chr14	70002858	70002858	+	21.8118	NA	intron (NM_022137, intron 7 of 11)	intron (NM_022137, intron 7 of 11)	77359	NM_182936	6547	Hs.337696	NM_033262	ENSG00000100678	SLC8A3	NCX3	solute carrier family 8 member A3	protein-coding
MEIS1_in_LV-MEIS1_peak_4564	chr5	167104653	167104653	+	21.8118	NA	Intergenic	Intergenic	63748	NR_134280	101927908		NR_134280	ENSG00000253469	LOC101927908	-	uncharacterized LOC101927908	ncRNA
MEIS1_in_LV-MEIS1_peak_2755	chr1_KI270765v1_alt	78884	78884	+	21.8118	NA	Intergenic	tRNA-Asn-AAC|tRNA|tRNA	-25276	NM_001164261	645142	Hs.730589	NM_001164261	ENSG00000256374	PPIAL4D	-	peptidylprolyl isomerase A like 4D	protein-coding
MEIS1_in_LV-MEIS1_peak_3182	chr20	40469060	40469060	+	21.8118	NA	Intergenic	Intergenic	220180	NM_005461	9935	Hs.169487	NM_005461	ENSG00000204103	MAFB	DURS3|KRML|MCTO	MAF bZIP transcription factor B	protein-coding
MEIS1_in_LV-MEIS1_peak_891	chr11	10670317	10670317	+	21.8118	NA	intron (NM_001206880, intron 1 of 19)	L5|LINE|RTE-X	-18016	NM_001098579	10335	Hs.501898	NM_130385	ENSG00000072952	MRVI1	IRAG|JAW1L	murine retrovirus integration site 1 homolog	protein-coding
MEIS1_in_LV-MEIS1_peak_1044	chr11	86699489	86699489	+	21.8118	NA	Intergenic	(TTGA)n|Simple_repeat|Simple_repeat	-26853	NM_001161586	10873	Hs.199743	NM_006680	ENSG00000151376	ME3	NADP-ME	malic enzyme 3	protein-coding
MEIS1_in_LV-MEIS1_peak_2651	chr19	38316152	38316152	+	21.8118	NA	promoter-TSS (NM_001039671)	promoter-TSS (NM_001039671)	-186	NM_001145463	90522	Hs.280741	NM_033557	ENSG00000167645	YIF1B	FinGER8	Yip1 interacting factor homolog B, membrane trafficking protein	protein-coding
MEIS1_in_LV-MEIS1_peak_4452	chr5	124599793	124599793	+	21.8118	NA	Intergenic	Intergenic	145319	NM_020747	57507	Hs.266616	NM_020747	ENSG00000168916	ZNF608	NY-REN-36	zinc finger protein 608	protein-coding
MEIS1_in_LV-MEIS1_peak_5688	chr9	27385778	27385778	+	21.8118	NA	intron (NM_024761, intron 2 of 3)	intron (NM_024761, intron 2 of 3)	-88639	NM_020641	54586	Hs.163070	NM_020641	ENSG00000120160	EQTN	AFAF|C9orf11|SPACA8	equatorin	protein-coding
MEIS1_in_LV-MEIS1_peak_2103	chr16	10744235	10744235	+	21.8118	NA	intron (NM_001323594, intron 2 of 8)	CpG	366	NM_001323597	4682	Hs.81469	NM_002484	ENSG00000103274	NUBP1	NBP|NBP1|NBP35	nucleotide binding protein 1	protein-coding
MEIS1_in_LV-MEIS1_peak_5920	chrX	70220592	70220592	+	21.8118	NA	Intergenic	Intergenic	-14063	NM_001013579	158833	Hs.407641	NM_001013579	ENSG00000204195	AWAT1	DGA2|DGAT2L3	acyl-CoA wax alcohol acyltransferase 1	protein-coding
MEIS1_in_LV-MEIS1_peak_4448	chr5	123814325	123814325	+	21.8118	NA	Intergenic	Intergenic	268908	NM_001270572	1456	Hs.129206	NM_004384	ENSG00000151292	CSNK1G3	CKI-gamma 3|CSNK1G3L	casein kinase 1 gamma 3	protein-coding
MEIS1_in_LV-MEIS1_peak_2641	chr19	28289869	28289869	+	21.8118	NA	Intergenic	Intergenic	-316819	NR_135636	102724908		NR_135636	ENSG00000266976	LOC102724908	-	uncharacterized LOC102724908	ncRNA
MEIS1_in_LV-MEIS1_peak_3966	chr4	80307584	80307584	+	21.8118	NA	Intergenic	Intergenic	-28136	NM_152770	255119	Hs.527104	NM_152770	ENSG00000197826	CFAP299	C4orf22	cilia and flagella associated protein 299	protein-coding
MEIS1_in_LV-MEIS1_peak_5784	chr9	94631105	94631105	+	21.8118	NA	intron (NM_001127628, intron 2 of 7)	intron (NM_001127628, intron 2 of 7)	8536	NM_000507	2203	Hs.494496	NM_000507	ENSG00000165140	FBP1	FBP	fructose-bisphosphatase 1	protein-coding
MEIS1_in_LV-MEIS1_peak_3786	chr3	177360070	177360070	+	21.8118	NA	Intergenic	Intergenic	65628	NR_047465	100820709	Hs.518409	NR_047465	ENSG00000203645	LINC00501	-	long intergenic non-protein coding RNA 501	ncRNA
MEIS1_in_LV-MEIS1_peak_2268	chr17	19188240	19188240	+	21.8118	NA	TTS (NR_006880)	TTS (NR_006880)	224	NR_006880	780851		NR_006880	ENSG00000263934	SNORD3A	RNU3|U3	small nucleolar RNA, C/D box 3A	snoRNA
MEIS1_in_LV-MEIS1_peak_5645	chr8_KI270821v1_alt	154615	154615	+	21.8118	NA	promoter-TSS (NR_126346).2	promoter-TSS (NR_126346).2	-158	NR_126346	104266957	Hs.734498	NR_126346	ENSG00000253696	KBTBD11-OT1	-	KBTBD11 overlapping transcript 1	ncRNA
MEIS1_in_LV-MEIS1_peak_4387	chr5	96331775	96331775	+	21.8118	NA	intron (NR_130776, intron 3 of 4)	intron (NR_130776, intron 3 of 4)	100384	NM_001177875	5122	Hs.78977	NM_000439	ENSG00000175426	PCSK1	BMIQ12|NEC1|PC1|PC3|SPC3	proprotein convertase subtilisin/kexin type 1	protein-coding
MEIS1_in_LV-MEIS1_peak_104	chr1	40373708	40373708	+	21.8118	NA	promoter-TSS (NM_022733)	promoter-TSS (NM_022733)	2	NM_022733	64744	Hs.15200	NM_022733	ENSG00000084070	SMAP2	SMAP1L	small ArfGAP2	protein-coding
MEIS1_in_LV-MEIS1_peak_2982	chr2	175233254	175233254	+	21.8118	NA	Intergenic	MER58A|DNA|hAT-Charlie	-51492	NM_001190329	518	Hs.429	NM_001689	ENSG00000154518	ATP5MC3	ATP5G3|P3	ATP synthase membrane subunit c locus 3	protein-coding
MEIS1_in_LV-MEIS1_peak_4751	chr6	87806919	87806919	+	21.7968	NA	intron (NR_110869, intron 2 of 4)	L2a|LINE|L2	22059	NR_110869	101928911	Hs.571178	NR_110869		LOC101928911	-	uncharacterized LOC101928911	ncRNA
MEIS1_in_LV-MEIS1_peak_1367	chr12	64083448	64083448	+	21.7296	NA	intron (NM_020762, intron 10 of 21)	intron (NM_020762, intron 10 of 21)	138848	NM_001300940	144577	Hs.444671	NM_152440	ENSG00000174206	C12orf66	-	chromosome 12 open reading frame 66	protein-coding
MEIS1_in_LV-MEIS1_peak_2886	chr2	78532166	78532166	+	21.7266	NA	Intergenic	Intergenic	-13365	NR_136312	105374820	Hs.570225	NR_136311		LOC105374820	-	uncharacterized LOC105374820	ncRNA
MEIS1_in_LV-MEIS1_peak_1440	chr12	86379538	86379538	+	21.7146	NA	intron (NM_013244, intron 2 of 6)	L2a|LINE|L2	459366	NM_013244	25834	Hs.589093	NM_013244	ENSG00000182050	MGAT4C	GNTIVH|HGNT-IV-H	MGAT4 family member C	protein-coding
MEIS1_in_LV-MEIS1_peak_304	chr1	150697333	150697333	+	21.6916	NA	promoter-TSS (NM_018178)	promoter-TSS (NM_018178)	-137	NM_018178	55204	Hs.203699	NM_018178	ENSG00000143457	GOLPH3L	GPP34R	golgi phosphoprotein 3 like	protein-coding
MEIS1_in_LV-MEIS1_peak_1360	chr12	63495997	63495997	+	21.6663	NA	Intergenic	Intergenic	172577	NM_173812	283417	Hs.533644	NM_173812	ENSG00000177990	DPY19L2	SPATA34|SPGF9	dpy-19 like 2	protein-coding
MEIS1_in_LV-MEIS1_peak_427	chr1	180044207	180044207	+	21.6663	NA	intron (NM_014810, intron 21 of 37)	intron (NM_014810, intron 21 of 37)	89434	NM_014810	9857	Hs.413045	NM_014810	ENSG00000135837	CEP350	CAP350|GM133	centrosomal protein 350	protein-coding
MEIS1_in_LV-MEIS1_peak_3845	chr3	195274732	195274732	+	21.6587	NA	TTS (NM_012287)	TTS (NM_012287)	-3566	NM_152531	152002	Hs.478741	NM_152531	ENSG00000173950	XXYLT1	C3orf21	xyloside xylosyltransferase 1	protein-coding
MEIS1_in_LV-MEIS1_peak_1125	chr11	125164783	125164783	+	21.651	NA	promoter-TSS (NR_125759)	promoter-TSS (NR_125759)	120	NM_022062	63876	Hs.278564	NM_022062	ENSG00000165495	PKNOX2	PREP2	PBX/knotted 1 homeobox 2	protein-coding
MEIS1_in_LV-MEIS1_peak_1383	chr12	69008235	69008235	+	21.651	NA	Intergenic	Intergenic	-44995	NM_001874	1368	Hs.654387	NM_001874	ENSG00000135678	CPM	-	carboxypeptidase M	protein-coding
MEIS1_in_LV-MEIS1_peak_3012	chr2	187594601	187594601	+	21.651	NA	Intergenic	Intergenic	-40096	NM_001329239	7035	Hs.516578	NM_006287	ENSG00000003436	TFPI	EPI|LACI|TFI|TFPI1	tissue factor pathway inhibitor	protein-coding
MEIS1_in_LV-MEIS1_peak_4159	chr4	147054718	147054718	+	21.6502	NA	Intergenic	Intergenic	-108832	NM_001300761	83894	Hs.378893	NM_031956	ENSG00000137473	TTC29	NYD-SP14|TBPP2A	tetratricopeptide repeat domain 29	protein-coding
MEIS1_in_LV-MEIS1_peak_1802	chr14	22871723	22871723	+	21.6248	NA	promoter-TSS (NM_014045)	promoter-TSS (NM_014045)	6	NM_001329226	26020	Hs.525232	NM_014045	ENSG00000197324	LRP10	LRP-10|LRP9|MST087|MSTP087	LDL receptor related protein 10	protein-coding
MEIS1_in_LV-MEIS1_peak_3868	chr4	13545075	13545075	+	21.6248	NA	promoter-TSS (NM_001189)	promoter-TSS (NM_001189)	-585	NM_001189	579	Hs.590927	NM_001189	ENSG00000109705	NKX3-2	BAPX1|NKX3.2|NKX3B|SMMD	NK3 homeobox 2	protein-coding
MEIS1_in_LV-MEIS1_peak_1554	chr12	118611398	118611398	+	21.6248	NA	Intergenic	Intergenic	150281	NR_134998	105370014	Hs.550870	NR_134998	ENSG00000256750	LINC02423	-	long intergenic non-protein coding RNA 2423	ncRNA
MEIS1_in_LV-MEIS1_peak_4013	chr4	94473771	94473771	+	21.6174	NA	intron (NM_001256428, intron 2 of 11)	intron (NM_001256428, intron 2 of 11)	21914	NR_046186	10611	Hs.480311	NM_006457	ENSG00000163110	PDLIM5	ENH|ENH1|L9|LIM	PDZ and LIM domain 5	protein-coding
MEIS1_in_LV-MEIS1_peak_4164	chr4	148988818	148988818	+	21.6174	NA	Intergenic	Intergenic	-46440	NR_134681	105377480	Hs.148699	NR_134681	ENSG00000249317	LOC105377480	-	uncharacterized LOC105377480	ncRNA
MEIS1_in_LV-MEIS1_peak_534	chr1	207043585	207043585	+	21.5231	NA	TTS (NM_018566)	TTS (NM_018566)	7492	NM_018566	55432	Hs.567533	NM_018566	ENSG00000180667	YOD1	DUBA8|OTUD2|PRO0907	YOD1 deubiquitinase	protein-coding
MEIS1_in_LV-MEIS1_peak_4398	chr5	102796077	102796077	+	21.5213	NA	intron (NM_001319943, intron 1 of 26)	intron (NM_001319943, intron 1 of 26)	41294	NM_001319943	5066	Hs.369430	NM_000919	ENSG00000145730	PAM	PAL|PHM	peptidylglycine alpha-amidating monooxygenase	protein-coding
MEIS1_in_LV-MEIS1_peak_2204	chr16	78099479	78099479	+	21.4681	NA	promoter-TSS (NR_120436)	promoter-TSS (NR_120436)	66	NR_120436	51741	Hs.461453	NM_016373	ENSG00000186153	WWOX	D16S432E|EIEE28|FOR|FRA16D|HHCMA56|PRO0128|SCAR12|SDR41C1|WOX1	WW domain containing oxidoreductase	protein-coding
MEIS1_in_LV-MEIS1_peak_139	chr1	65504161	65504161	+	21.46	NA	intron (NM_001003680, intron 2 of 19)	L1MC3|LINE|L1	-21528	NM_001198687	3953	Hs.23581	NM_002303	ENSG00000116678	LEPR	CD295|LEP-R|LEPRD|OB-R|OBR	leptin receptor	protein-coding
MEIS1_in_LV-MEIS1_peak_1499	chr12	102249258	102249258	+	21.46	NA	Intergenic	L1M7|LINE|L1	-51413	NM_002674	5367	Hs.707990	NM_002674	ENSG00000183395	PMCH	MCH|ppMCH	pro-melanin concentrating hormone	protein-coding
MEIS1_in_LV-MEIS1_peak_607	chr1	228728634	228728634	+	21.46	NA	intron (NR_037962, intron 1 of 2)	intron (NR_037962, intron 1 of 2)	-6443	NM_021205	58480	Hs.647774	NM_021205	ENSG00000116574	RHOU	ARHU|CDC42L1|G28K|WRCH1|hG28K	ras homolog family member U	protein-coding
MEIS1_in_LV-MEIS1_peak_3237	chr21	16170088	16170088	+	21.46	NA	intron (NR_111005, intron 1 of 6)	intron (NR_111005, intron 1 of 6)	-11310	NR_136551	388815	Hs.473394	NR_027790		MIR99AHG	C21orf34|C21orf35|LINC00478|MONC	mir-99a-let-7c cluster host gene	ncRNA
MEIS1_in_LV-MEIS1_peak_4620	chr6	21557134	21557134	+	21.46	NA	Intergenic	Intergenic	-36607	NM_003107	6659	Hs.643910	NM_003107	ENSG00000124766	SOX4	EVI16	SRY-box 4	protein-coding
MEIS1_in_LV-MEIS1_peak_4073	chr4	115113301	115113301	+	21.46	NA	intron (NM_022569, intron 1 of 13)	intron (NM_022569, intron 1 of 13)	575	NM_022569	64579	Hs.591700	NM_022569	ENSG00000138653	NDST4	N-HSST|N-HSST 4|NDST-4|NHSST4	N-deacetylase and N-sulfotransferase 4	protein-coding
MEIS1_in_LV-MEIS1_peak_3665	chr3	142363877	142363877	+	21.46	NA	intron (NM_001282857, intron 29 of 40)	L1ME1|LINE|L1	84185	NM_001282859	54464	Hs.435103	NM_019001	ENSG00000114127	XRN1	2019-09-01	5'-3' exoribonuclease 1	protein-coding
MEIS1_in_LV-MEIS1_peak_1678	chr13	62630033	62630033	+	21.46	NA	Intergenic	Intergenic	166659	NR_120404	100874176	Hs.402083	NR_047029		LINC00448	-	long intergenic non-protein coding RNA 448	ncRNA
MEIS1_in_LV-MEIS1_peak_3719	chr3	158723260	158723260	+	21.46	NA	intron (NM_002888, intron 1 of 3)	intron (NM_002888, intron 1 of 3)	9226	NM_002888	5918	Hs.131269	NM_002888	ENSG00000118849	RARRES1	LXNL|PERG-1|TIG1	retinoic acid receptor responder 1	protein-coding
MEIS1_in_LV-MEIS1_peak_933	chr11	34890976	34890976	+	21.456	NA	intron (NM_015957, intron 2 of 6)	intron (NM_015957, intron 2 of 6)	-25154	NM_001166158	8050	Hs.502315	NM_003477	ENSG00000110435	PDHX	DLDBP|E3BP|OPDX|PDHXD|PDX1|proX	pyruvate dehydrogenase complex component X	protein-coding
MEIS1_in_LV-MEIS1_peak_615	chr1	230186307	230186307	+	21.4381	NA	intron (NM_001291866, intron 2 of 15)	intron (NM_001291866, intron 2 of 15)	119112	NR_120373	2590	Hs.743964	NM_004481	ENSG00000143641	GALNT2	GalNAc-T2	polypeptide N-acetylgalactosaminyltransferase 2	protein-coding
MEIS1_in_LV-MEIS1_peak_828	chr10	94402387	94402387	+	21.4297	NA	promoter-TSS (NM_015188)	promoter-TSS (NM_015188)	-42	NM_015188	23232	Hs.500598	NM_015188	ENSG00000108239	TBC1D12	-	TBC1 domain family member 12	protein-coding
MEIS1_in_LV-MEIS1_peak_4063	chr4	110904833	110904833	+	21.4229	NA	Intergenic	Intergenic	-44186	NR_030643	100126354		NR_030643	ENSG00000215961	MIR297	MIRN297|hsa-mir-297	microRNA 297	ncRNA
MEIS1_in_LV-MEIS1_peak_5073	chr7	51456184	51456184	+	21.4229	NA	Intergenic	Intergenic	-139323	NM_001346444	23242	Hs.99141	NM_015198	ENSG00000106078	COBL	-	cordon-bleu WH2 repeat protein	protein-coding
MEIS1_in_LV-MEIS1_peak_665	chr1	247112479	247112479	+	21.4229	NA	promoter-TSS (NM_207401)	promoter-TSS (NM_207401)	-62	NM_207401	388759	Hs.456511	NM_207401		C1orf229	-	chromosome 1 open reading frame 229	protein-coding
MEIS1_in_LV-MEIS1_peak_1322	chr12	55997145	55997145	+	21.3824	NA	promoter-TSS (NM_000456)	promoter-TSS (NM_000456)	-114	NM_001032387	6821	Hs.558403	NM_000456	ENSG00000139531	SUOX	-	sulfite oxidase	protein-coding
MEIS1_in_LV-MEIS1_peak_3756	chr3	171459405	171459405	+	21.3707	NA	intron (NM_001161560, intron 1 of 31)	intron (NM_001161560, intron 1 of 31)	1003	NM_001161560	23043	Hs.34024	NM_015028	ENSG00000154310	TNIK	MRT54	TRAF2 and NCK interacting kinase	protein-coding
MEIS1_in_LV-MEIS1_peak_3694	chr3	152211817	152211817	+	21.3367	NA	Intergenic	Intergenic	-6388	NR_136178	101928166		NR_136178		LOC101928166	-	uncharacterized LOC101928166	ncRNA
MEIS1_in_LV-MEIS1_peak_4069	chr4	114250651	114250651	+	21.3355	NA	Intergenic	Intergenic	-270929	NM_024590	79642	Hs.22895	NM_024590	ENSG00000180801	ARSJ	ASJ	arylsulfatase family member J	protein-coding
MEIS1_in_LV-MEIS1_peak_701	chr10	20622944	20622944	+	21.3355	NA	Intergenic	Intergenic	70974	NR_039822	100616383		NR_039822	ENSG00000265372	MIR4675	-	microRNA 4675	ncRNA
MEIS1_in_LV-MEIS1_peak_4553	chr5	163790344	163790344	+	21.3355	NA	Intergenic	Intergenic	284816	NM_013283	27430	Hs.54642	NM_013283	ENSG00000038274	MAT2B	MAT-II|MATIIbeta|Nbla02999|SDR23E1|TGR	methionine adenosyltransferase 2B	protein-coding
MEIS1_in_LV-MEIS1_peak_4797	chr6	110952440	110952440	+	21.3355	NA	Intergenic	LTR44|LTR|ERV1	-6120	NM_138408	112495	Hs.418520	NM_138408	ENSG00000155115	GTF3C6	C6orf51|TFIIIC35|bA397G5.3	general transcription factor IIIC subunit 6	protein-coding
MEIS1_in_LV-MEIS1_peak_4135	chr4	140005916	140005916	+	21.3355	NA	intron (NM_018717, intron 1 of 5)	intron (NM_018717, intron 1 of 5)	148163	NM_018717	55534	Hs.586165	NM_018717	ENSG00000196782	MAML3	CAGH3|ERDA3|GDN|MAM-2|MAM2|TNRC3	mastermind like transcriptional coactivator 3	protein-coding
MEIS1_in_LV-MEIS1_peak_2578	chr19	12035765	12035765	+	21.3355	NA	promoter-TSS (NM_001080411)	promoter-TSS (NM_001080411)	-24	NM_001308351	163059	Hs.667776	NM_152602	ENSG00000197647	ZNF433	-	zinc finger protein 433	protein-coding
MEIS1_in_LV-MEIS1_peak_1777	chr13	104445257	104445257	+	21.3355	NA	Intergenic	L1PA8|LINE|L1	1020057	NR_126374	104326190	Hs.334381	NR_126374	ENSG00000234551	LINC01309	TCONS_l2_00007459	long intergenic non-protein coding RNA 1309	ncRNA
MEIS1_in_LV-MEIS1_peak_3181	chr20	39986803	39986803	+	21.3355	NA	Intergenic	Intergenic	-17658	NR_109936	100505663	Hs.559348	NR_109936	ENSG00000237767	LINC01370	HI-LNC25|HILNC25	long intergenic non-protein coding RNA 1370	ncRNA
MEIS1_in_LV-MEIS1_peak_4392	chr5	100103815	100103815	+	21.3355	NA	Intergenic	Intergenic	284439	NR_027503	100133050	Hs.534796	NR_027503		LOC100133050	-	glucuronidase beta pseudogene	pseudo
MEIS1_in_LV-MEIS1_peak_1028	chr11	78099611	78099611	+	21.3355	NA	Intergenic	MIRc|SINE|MIR	-19392	NM_004549	4718	Hs.407860	NM_004549	ENSG00000151366	NDUFC2	B14.5b|CI-B14.5b|HLC-1|NADHDH2	NADH:ubiquinone oxidoreductase subunit C2	protein-coding
MEIS1_in_LV-MEIS1_peak_3	chr1	921168	921168	+	21.2569	NA	Intergenic	Intergenic	-1476	NR_122045	100130417	Hs.200644	NM_175912	ENSG00000223764	LOC100130417	-	uncharacterized LOC100130417	ncRNA
MEIS1_in_LV-MEIS1_peak_3511	chr3	79885627	79885627	+	21.2105	NA	Intergenic	Intergenic	-117718	NM_002941	6091	Hs.744218	NM_002941	ENSG00000169855	ROBO1	DUTT1|SAX3	roundabout guidance receptor 1	protein-coding
MEIS1_in_LV-MEIS1_peak_438	chr1	182279469	182279469	+	21.2042	NA	intron (NR_104175, intron 2 of 2)	intron (NR_104175, intron 2 of 2)	34592	NR_104175	400799	Hs.634884	NR_104175	ENSG00000228918	LINC01344	GS1-122H1.2	long intergenic non-protein coding RNA 1344	ncRNA
MEIS1_in_LV-MEIS1_peak_3083	chr2	215835594	215835594	+	21.2042	NA	intron (NR_037195, intron 1 of 9)	intron (NR_037195, intron 1 of 9)	7942	NR_037195	646324	Hs.655713	NR_037195	ENSG00000235770	LINC00607	-	long intergenic non-protein coding RNA 607	ncRNA
MEIS1_in_LV-MEIS1_peak_4994	chr7	23014209	23014209	+	21.2042	NA	promoter-TSS (NM_032581)	promoter-TSS (NM_032581)	-58	NM_032581	84668	Hs.85603	NM_032581	ENSG00000122591	FAM126A	DRCTNNB1A|HCC|HLD5|HYCC1	family with sequence similarity 126 member A	protein-coding
MEIS1_in_LV-MEIS1_peak_1321	chr12	55973685	55973685	+	21.2042	NA	promoter-TSS (NM_001252036)	promoter-TSS (NM_001252036)	-228	NM_001252036	5869	Hs.157659	NM_002868	ENSG00000111540	RAB5B	-	RAB5B, member RAS oncogene family	protein-coding
MEIS1_in_LV-MEIS1_peak_4185	chr4	161356564	161356564	+	21.2042	NA	Intergenic	MIRc|SINE|MIR	-666169	NR_125888	101928052	Hs.647993	NR_125888	ENSG00000249419	LOC101928052	-	uncharacterized LOC101928052	ncRNA
MEIS1_in_LV-MEIS1_peak_5745	chr9	73463864	73463864	+	21.2042	NA	Intergenic	Intergenic	312133	NM_000700	301	Hs.494173	NM_000700	ENSG00000135046	ANXA1	ANX1|LPC1	annexin A1	protein-coding
MEIS1_in_LV-MEIS1_peak_3936	chr4	69027660	69027660	+	21.2042	NA	Intergenic	Intergenic	-7263	NM_001290091	7365	Hs.201634	NM_001075	ENSG00000109181	UGT2B10	UDPGT2B10	UDP glucuronosyltransferase family 2 member B10	protein-coding
MEIS1_in_LV-MEIS1_peak_3041	chr2	196291452	196291452	+	21.2042	NA	intron (NM_020760, intron 14 of 28)	intron (NM_020760, intron 14 of 28)	31428	NR_110225	101927482	Hs.191841	NR_110225		LOC101927482	-	uncharacterized LOC101927482	ncRNA
MEIS1_in_LV-MEIS1_peak_4515	chr5	143418180	143418180	+	21.2042	NA	intron (NM_001018075, intron 1 of 8)	intron (NM_001018075, intron 1 of 8)	-13700	NM_001018076	2908	Hs.122926	NM_000176	ENSG00000113580	NR3C1	GCCR|GCR|GCRST|GR|GRL	nuclear receptor subfamily 3 group C member 1	protein-coding
MEIS1_in_LV-MEIS1_peak_5090	chr7	64666015	64666015	+	21.1252	NA	promoter-TSS (NR_104148)	promoter-TSS (NR_104148)	-68	NR_104148	51427	Hs.50216	NM_016220	ENSG00000196247	ZNF107	Y8|ZFD25|ZNF588|smap-7	zinc finger protein 107	protein-coding
MEIS1_in_LV-MEIS1_peak_3690	chr3	150539085	150539085	+	21.0943	NA	Intergenic	Intergenic	7556	NM_014445	27230	Hs.518326	NM_014445	ENSG00000120742	SERP1	RAMP4	stress associated endoplasmic reticulum protein 1	protein-coding
MEIS1_in_LV-MEIS1_peak_5336	chr7	123643971	123643971	+	21.0943	NA	Intergenic	Intergenic	-11836	NM_207163	442721	Hs.592260	NM_207163	ENSG00000170807	LMOD2	C-LMOD|CLMOD	leiomodin 2	protein-coding
MEIS1_in_LV-MEIS1_peak_1405	chr12	74624370	74624370	+	21.0762	NA	Intergenic	L1MC1|LINE|L1	86599	NM_001136262	552889	Hs.744849	NM_001136262	ENSG00000253719	ATXN7L3B	lnc-SCA7	ataxin 7 like 3B	protein-coding
MEIS1_in_LV-MEIS1_peak_2429	chr18	22481435	22481435	+	21.0762	NA	Intergenic	L1MA4A|LINE|L1	-63520	NM_172241	64693	Hs.406709	NM_022663	ENSG00000212710	CTAGE1	CT21.1|CT21.2|CTAGE|CTAGE-1|CTAGE-2	cutaneous T cell lymphoma-associated antigen 1	protein-coding
MEIS1_in_LV-MEIS1_peak_481	chr1	195185795	195185795	+	21.0762	NA	Intergenic	Intergenic	1396686	NR_039888	100616363		NR_039888	ENSG00000265986	MIR4735	-	microRNA 4735	ncRNA
MEIS1_in_LV-MEIS1_peak_994	chr11	65546755	65546755	+	21.0762	NA	intron (NM_021070, intron 15 of 26)	CpG-4462	11473	NM_021070	4054	Hs.289019	NM_021070	ENSG00000168056	LTBP3	DASS|GPHYSD3|LTBP-3|LTBP2|STHAG6|pp6425	latent transforming growth factor beta binding protein 3	protein-coding
MEIS1_in_LV-MEIS1_peak_2233	chr17	4143063	4143063	+	21.0762	NA	promoter-TSS (NM_015113)	promoter-TSS (NM_015113)	-104	NM_015113	23140	Hs.277624	NM_015113	ENSG00000074755	ZZEF1	ZZZ4	zinc finger ZZ-type and EF-hand domain containing 1	protein-coding
MEIS1_in_LV-MEIS1_peak_292	chr1	149832650	149832650	+	21.0762	NA	promoter-TSS (NM_003548)	promoter-TSS (NM_003548)	-7	NM_003548	8370	Hs.55468	NM_003548	ENSG00000270882	HIST2H4A	FO108|H4|H4/n|H4F2|H4FN|HIST2H4	histone cluster 2 H4 family member a	protein-coding
MEIS1_in_LV-MEIS1_peak_437	chr1	182270928	182270928	+	21.0762	NA	intron (NR_104175, intron 2 of 2)	L1MC3|LINE|L1	43133	NR_104175	400799	Hs.634884	NR_104175	ENSG00000228918	LINC01344	GS1-122H1.2	long intergenic non-protein coding RNA 1344	ncRNA
MEIS1_in_LV-MEIS1_peak_4369	chr5	91885455	91885455	+	21.0668	NA	Intergenic	Intergenic	-502082	NM_020801	57561	Hs.24684	NM_020801	ENSG00000113369	ARRDC3	TLIMP	arrestin domain containing 3	protein-coding
MEIS1_in_LV-MEIS1_peak_1817	chr14	29896629	29896629	+	21.0386	NA	intron (NM_001330069, intron 1 of 18)	intron (NM_001330069, intron 1 of 18)	31064	NM_002742	5587	Hs.508999	NM_002742	ENSG00000184304	PRKD1	CHDED|PKC-MU|PKCM|PKD|PRKCM	protein kinase D1	protein-coding
MEIS1_in_LV-MEIS1_peak_3535	chr3	89107635	89107635	+	21.0071	NA	5' UTR (NM_182644, exon 1 of 7)	5' UTR (NM_182644, exon 1 of 7)	111	NM_005233	2042	Hs.123642	NM_005233	ENSG00000044524	EPHA3	EK4|ETK|ETK1|HEK|HEK4|TYRO4	EPH receptor A3	protein-coding
MEIS1_in_LV-MEIS1_peak_3889	chr4	31283916	31283916	+	20.9534	NA	Intergenic	L1ME4a|LINE|L1	112772	NR_125935	102723778	Hs.210739	NR_125935	ENSG00000251182	LINC02497	-	long intergenic non-protein coding RNA 2497	ncRNA
MEIS1_in_LV-MEIS1_peak_1846	chr14	39032165	39032165	+	20.9534	NA	3' UTR (NM_006364, exon 20 of 20)	3' UTR (NM_006364, exon 20 of 20)	71363	NM_006364	10484	Hs.272927	NM_006364	ENSG00000100934	SEC23A	CLSD|hSec23A	Sec23 homolog A, coat complex II component	protein-coding
MEIS1_in_LV-MEIS1_peak_474	chr1	192973399	192973399	+	20.9421	NA	Intergenic	L1ME1|LINE|L1	-25142	NR_126003	102724954	Hs.243488	NR_126003		LINC01032	-	long intergenic non-protein coding RNA 1032	ncRNA
MEIS1_in_LV-MEIS1_peak_344	chr1	156194024	156194024	+	20.8986	NA	promoter-TSS (NM_001286184)	promoter-TSS (NM_001286184)	92	NM_014655	9673	Hs.532375	NM_014655	ENSG00000160785	SLC25A44	-	solute carrier family 25 member 44	protein-coding
MEIS1_in_LV-MEIS1_peak_608	chr1	229214826	229214826	+	20.8986	NA	Intergenic	L1ME4b|LINE|L1	-40025	NR_039659	100616234		NR_039659	ENSG00000283468	MIR4454	-	microRNA 4454	ncRNA
MEIS1_in_LV-MEIS1_peak_4465	chr5	127479994	127479994	+	20.8986	NA	Intergenic	L1ME4a|LINE|L1	-37615	NM_001286808	133619	Hs.483259	NM_130809	ENSG00000164244	PRRC1	-	proline rich coiled-coil 1	protein-coding
MEIS1_in_LV-MEIS1_peak_492	chr1	200410137	200410137	+	20.8676	NA	promoter-TSS (NM_001281293)	promoter-TSS (NM_001281293)	-79	NM_001281294	23528	Hs.59757	NM_012482	ENSG00000162702	ZNF281	ZBP-99|ZNP-99	zinc finger protein 281	protein-coding
MEIS1_in_LV-MEIS1_peak_4064	chr4	111883922	111883922	+	20.8408	NA	Intergenic	Intergenic	-261475	NM_152400	132720	Hs.23439	NM_152400	ENSG00000174749	FAM241A	C4orf32	family with sequence similarity 241 member A	protein-coding
MEIS1_in_LV-MEIS1_peak_585	chr1	224036053	224036053	+	20.8408	NA	Intergenic	Intergenic	43323	NR_136591	100287497	Hs.568390	NR_136590		LOC100287497	-	septin 7 pseudogene	pseudo
MEIS1_in_LV-MEIS1_peak_381	chr1	166876468	166876468	+	20.8129	NA	promoter-TSS (NM_053053)	promoter-TSS (NM_053053)	-51	NM_053053	117143	Hs.435967	NM_053053	ENSG00000152382	TADA1	ADA1|HFI1|STAF42|TADA1L|hADA1	transcriptional adaptor 1	protein-coding
MEIS1_in_LV-MEIS1_peak_4065	chr4	111933908	111933908	+	20.8129	NA	Intergenic	L2b|LINE|L2	-211489	NM_152400	132720	Hs.23439	NM_152400	ENSG00000174749	FAM241A	C4orf32	family with sequence similarity 241 member A	protein-coding
MEIS1_in_LV-MEIS1_peak_3736	chr3	165836738	165836738	+	20.8129	NA	intron (NR_137636, intron 1 of 4)	intron (NR_137636, intron 1 of 4)	734	NR_137636	590	Hs.420483	NM_000055	ENSG00000114200	BCHE	CHE1|CHE2|E1	butyrylcholinesterase	protein-coding
MEIS1_in_LV-MEIS1_peak_174	chr1	84020391	84020391	+	20.7975	NA	Intergenic	MER101B|LTR|ERV1	-21241	NM_024686	79739	Hs.445826	NM_024686	ENSG00000137941	TTLL7	-	tubulin tyrosine ligase like 7	protein-coding
MEIS1_in_LV-MEIS1_peak_3790	chr3	178089153	178089153	+	20.7975	NA	Intergenic	Intergenic	272288	NR_110826	102724550	Hs.570526	NR_110826	ENSG00000231574	LINC02015	KCCAT211	long intergenic non-protein coding RNA 2015	ncRNA
MEIS1_in_LV-MEIS1_peak_3507	chr3	79358561	79358561	+	20.7826	NA	intron (NM_002941, intron 2 of 30)	intron (NM_002941, intron 2 of 30)	-53166	NR_110133	101927374	Hs.570644	NR_110133		LOC101927374	-	uncharacterized LOC101927374	ncRNA
MEIS1_in_LV-MEIS1_peak_1586	chr12	124917382	124917382	+	20.7813	NA	Intergenic	Intergenic	1835	NR_049820	100847004		NR_049820	ENSG00000265345	MIR5188	mir-5188	microRNA 5188	ncRNA
MEIS1_in_LV-MEIS1_peak_3687	chr3	149086644	149086644	+	20.7813	NA	promoter-TSS (NM_003071)	promoter-TSS (NM_003071)	-90	NM_139048	6596	Hs.3068	NM_003071	ENSG00000071794	HLTF	HIP116|HIP116A|HLTF1|RNF80|SMARCA3|SNF2L3|ZBU1	helicase like transcription factor	protein-coding
MEIS1_in_LV-MEIS1_peak_1094	chr11	107928302	107928302	+	20.7684	NA	promoter-TSS (NM_017516)	promoter-TSS (NM_017516)	-173	NM_017516	54734	Hs.354906	NM_017516	ENSG00000179331	RAB39A	RAB39	RAB39A, member RAS oncogene family	protein-coding
MEIS1_in_LV-MEIS1_peak_4645	chr6	35332373	35332373	+	20.7684	NA	Intergenic	L1P2|LINE|L1	-10185	NM_001171819	5467	Hs.696032	NM_006238	ENSG00000112033	PPARD	FAAR|NR1C2|NUC1|NUCI|NUCII|PPARB	peroxisome proliferator activated receptor delta	protein-coding
MEIS1_in_LV-MEIS1_peak_1138	chr12	1831286	1831286	+	20.7684	NA	exon (NM_001039029, exon 4 of 5)	exon (NM_001039029, exon 4 of 5)	11019	NM_001163925	654429	Hs.585579	NM_001039029	ENSG00000166159	LRTM2	-	leucine rich repeats and transmembrane domains 2	protein-coding
MEIS1_in_LV-MEIS1_peak_1535	chr12	113246071	113246071	+	20.7684	NA	intron (NM_001301214, intron 1 of 26)	intron (NM_001301214, intron 1 of 26)	1810	NM_001301214	53373	Hs.524763	NM_017901	ENSG00000186815	TPCN1	TPC1	two pore segment channel 1	protein-coding
MEIS1_in_LV-MEIS1_peak_2628	chr19	21505538	21505538	+	20.7684	NA	promoter-TSS (NM_001001415)	promoter-TSS (NM_001001415)	-14	NM_001001415	353088	Hs.572567	NM_001001415	ENSG00000197013	ZNF429	-	zinc finger protein 429	protein-coding
MEIS1_in_LV-MEIS1_peak_1704	chr13	75467191	75467191	+	20.7684	NA	intron (NM_014832, intron 1 of 20)	intron (NM_014832, intron 1 of 20)	14977	NM_001286658	9882	Hs.210891	NM_014832	ENSG00000136111	TBC1D4	AS160|NIDDM5	TBC1 domain family member 4	protein-coding
MEIS1_in_LV-MEIS1_peak_2636	chr19	23687318	23687318	+	20.7684	NA	promoter-TSS (NM_138330)	promoter-TSS (NM_138330)	-103	NM_138330	171392	Hs.264345	NM_138330	ENSG00000197372	ZNF675	TBZF|TIZ	zinc finger protein 675	protein-coding
MEIS1_in_LV-MEIS1_peak_5925	chrX	86461640	86461640	+	20.7684	NA	intron (NM_053281, intron 2 of 11)	intron (NM_053281, intron 2 of 11)	198672	NM_001139515	117154	Hs.86603	NM_053281	ENSG00000126733	DACH2	-	dachshund family transcription factor 2	protein-coding
MEIS1_in_LV-MEIS1_peak_4902	chr6_GL000253v2_alt	3875132	3875132	+	20.7684	NA	Intergenic	L1MEg2|LINE|L1	131073	NM_019111	3122	Hs.520048	NM_019111	ENSG00000204287	HLA-DRA	HLA-DRA1	major histocompatibility complex, class II, DR alpha	protein-coding
MEIS1_in_LV-MEIS1_peak_2920	chr2	102702497	102702497	+	20.7684	NA	exon (NM_003048, exon 9 of 12)	exon (NM_003048, exon 9 of 12)	34391	NR_136174	84804	Hs.590898	NM_032718	ENSG00000135953	MFSD9	-	major facilitator superfamily domain containing 9	protein-coding
MEIS1_in_LV-MEIS1_peak_712	chr10	28802125	28802125	+	20.7684	NA	intron (NR_120652, intron 2 of 3)	intron (NR_120652, intron 2 of 3)	-6075	NR_038374	100507605	Hs.119207	NR_038374	ENSG00000235824	LINC00837	-	long intergenic non-protein coding RNA 837	ncRNA
MEIS1_in_LV-MEIS1_peak_128	chr1	53899305	53899305	+	20.7684	NA	intron (NM_001324316, intron 1 of 1)	intron (NM_001324316, intron 1 of 1)	5118	NR_136693	1733	Hs.251415	NM_000792	ENSG00000211452	DIO1	5DI|TXDI1	iodothyronine deiodinase 1	protein-coding
MEIS1_in_LV-MEIS1_peak_4221	chr4_GL000257v2_alt	247127	247127	+	20.7684	NA	promoter-TSS (NM_001076).2	promoter-TSS (NM_001076).2	4	NM_001076	7366	Hs.150207	NM_001076	ENSG00000196620	UGT2B15	HLUG4|UDPGT 2B8|UDPGT2B15|UDPGTH3|UGT2B8	UDP glucuronosyltransferase family 2 member B15	protein-coding
MEIS1_in_LV-MEIS1_peak_1700	chr13	73365401	73365401	+	20.7684	NA	Intergenic	Intergenic	-198843	NR_047009	100874155	Hs.672679	NR_047009		LINC00392	-	long intergenic non-protein coding RNA 392	ncRNA
MEIS1_in_LV-MEIS1_peak_4339	chr5	71749942	71749942	+	20.7684	NA	Intergenic	Intergenic	30779	NM_004291	9607	Hs.1707	NM_004291	ENSG00000164326	CARTPT	CART	CART prepropeptide	protein-coding
MEIS1_in_LV-MEIS1_peak_1646	chr13	50082022	50082022	+	20.7684	NA	promoter-TSS (NR_109973)	promoter-TSS (NR_109973)	-147	NR_109974	10301	Hs.591229	NM_005887	ENSG00000176124	DLEU1	BCMS|BCMS1|DLB1|DLEU2|LEU1|LEU2|LINC00021|NCRNA00021|XTP6	deleted in lymphocytic leukemia 1 (non-protein coding)	ncRNA
MEIS1_in_LV-MEIS1_peak_3428	chr3	32194801	32194801	+	20.7684	NA	Intergenic	Intergenic	-43878	NM_001320308	152189	Hs.154986	NM_178868	ENSG00000170293	CMTM8	CKLFSF8|CKLFSF8-V2	CKLF like MARVEL transmembrane domain containing 8	protein-coding
MEIS1_in_LV-MEIS1_peak_3377	chr3	7171612	7171612	+	20.7684	NA	intron (NM_181874, intron 2 of 10)	intron (NM_181874, intron 2 of 10)	-277595	NR_131906	105376946	Hs.616038	NR_131906	ENSG00000237665	GRM7-AS2	-	GRM7 antisense RNA 2	ncRNA
MEIS1_in_LV-MEIS1_peak_2279	chr17	27247560	27247560	+	20.7684	NA	Intergenic	Intergenic	46436	NR_039748	100616277		NR_039748	ENSG00000263583	MIR4522	-	microRNA 4522	ncRNA
MEIS1_in_LV-MEIS1_peak_4895	chr6	166006253	166006253	+	20.7684	NA	Intergenic	Intergenic	-18214	NR_026860	90632	Hs.31917	NR_026860	ENSG00000223414	LINC00473	C6orf176|bA142J11.1	long intergenic non-protein coding RNA 473	ncRNA
MEIS1_in_LV-MEIS1_peak_984	chr11	62921355	62921355	+	20.7684	NA	5' UTR (NM_000738, exon 1 of 2)	5' UTR (NM_000738, exon 1 of 2)	185	NM_000738	1128	Hs.632119	NM_000738	ENSG00000168539	CHRM1	HM1|M1|M1R	cholinergic receptor muscarinic 1	protein-coding
MEIS1_in_LV-MEIS1_peak_4629	chr6	26224067	26224067	+	20.7684	NA	Intergenic	Intergenic	-1088	NM_003532	8353	Hs.443021	NM_003532	ENSG00000274750	HIST1H3E	H3.1|H3/d|H3FD	histone cluster 1 H3 family member e	protein-coding
MEIS1_in_LV-MEIS1_peak_1676	chr13	62511027	62511027	+	20.7684	NA	Intergenic	L1PA16|LINE|L1	285665	NR_120404	100874176	Hs.402083	NR_047029		LINC00448	-	long intergenic non-protein coding RNA 448	ncRNA
MEIS1_in_LV-MEIS1_peak_5470	chr8	40156510	40156510	+	20.7684	NA	Intergenic	Intergenic	3042	NM_020130	56892	Hs.591849	NM_020130	ENSG00000176907	TCIM	C8orf4|TC-1|TC1	transcriptional and immune response regulator	protein-coding
MEIS1_in_LV-MEIS1_peak_5757	chr9	78821368	78821368	+	20.7684	NA	Intergenic	Intergenic	324298	NR_109771	101927450	Hs.738041	NR_109771	ENSG00000260995	LOC101927450	-	uncharacterized LOC101927450	ncRNA
MEIS1_in_LV-MEIS1_peak_3026	chr2	191677969	191677969	+	20.7684	NA	promoter-TSS (NM_001254736)	promoter-TSS (NM_001254736)	-103	NM_001254736	64859	Hs.591610	NM_022837	ENSG00000173559	NABP1	OBFC2A|SOSS-B2|SSB2	nucleic acid binding protein 1	protein-coding
MEIS1_in_LV-MEIS1_peak_2632	chr19	22784254	22784254	+	20.7684	NA	promoter-TSS (NM_001080409)	promoter-TSS (NM_001080409)	-83	NM_001080409	7652	Hs.568380	NM_001080409	ENSG00000213973	ZNF99	C19orf9|F8281	zinc finger protein 99	protein-coding
MEIS1_in_LV-MEIS1_peak_4754	chr6	89509846	89509846	+	20.7684	NA	intron (NM_014942, intron 1 of 15)	MIR|SINE|MIR	-52472	NM_001242811	22881	Hs.702213	NM_014942	ENSG00000135299	ANKRD6	-	ankyrin repeat domain 6	protein-coding
MEIS1_in_LV-MEIS1_peak_4881	chr6	153816458	153816458	+	20.7684	NA	Intergenic	Intergenic	-194038	NM_001145279	4988	Hs.2353	NM_000914	ENSG00000112038	OPRM1	LMOR|M-OR-1|MOP|MOR|MOR1|OPRM	opioid receptor mu 1	protein-coding
MEIS1_in_LV-MEIS1_peak_3953	chr4	76201053	76201053	+	20.7684	NA	intron (NM_005506, intron 1 of 11)	intron (NM_005506, intron 1 of 11)	12846	NM_005506	950	Hs.349656	NM_005506	ENSG00000138760	SCARB2	AMRF|CD36L2|EPM4|HLGP85|LGP85|LIMP-2|LIMPII|SR-BII	scavenger receptor class B member 2	protein-coding
MEIS1_in_LV-MEIS1_peak_688	chr10	7967285	7967285	+	20.7684	NA	intron (NM_031923, intron 3 of 6)	intron (NM_031923, intron 3 of 6)	85206	NR_104329	399717	Hs.158992	NM_207423	ENSG00000197308	GATA3-AS1	-	GATA3 antisense RNA 1	ncRNA
MEIS1_in_LV-MEIS1_peak_2718	chr19	50850878	50850878	+	20.7684	NA	intron (NR_131203, intron 2 of 2)	LTR40a|LTR|ERVL	-4037	NM_001030047	354	Hs.171995	NM_001648	ENSG00000142515	KLK3	APS|KLK2A1|PSA|hK3	kallikrein related peptidase 3	protein-coding
MEIS1_in_LV-MEIS1_peak_5823	chr9	115391413	115391413	+	20.7684	NA	intron (NM_017418, intron 5 of 7)	MIR3|SINE|MIR	249595	NM_017418	50514	Hs.148841	NM_017418	ENSG00000173077	2019-12-01	CTS9	deleted in esophageal cancer 1	protein-coding
MEIS1_in_LV-MEIS1_peak_4669	chr6	46849184	46849184	+	20.7684	NA	Intergenic	Intergenic	-54287	NR_110658	101926962	Hs.680113	NR_110658		LOC101926962	-	uncharacterized LOC101926962	ncRNA
MEIS1_in_LV-MEIS1_peak_1062	chr11	94833085	94833085	+	20.7684	NA	intron (NM_001301007, intron 5 of 11)	intron (NM_001301007, intron 5 of 11)	64743	NM_130847	154810	Hs.503594	NM_130847	ENSG00000166025	AMOTL1	JEAP	angiomotin like 1	protein-coding
MEIS1_in_LV-MEIS1_peak_5830	chr9	120843378	120843378	+	20.7684	NA	promoter-TSS (NM_001270427)	promoter-TSS (NM_001270427)	336	NR_024408	253039	Hs.594170	NR_024408	ENSG00000226752	CUTALP	PSMD5-AS1	cutA divalent cation tolerance homolog-like, pseudogene	pseudo
MEIS1_in_LV-MEIS1_peak_162	chr1	78549439	78549439	+	20.7684	NA	Intergenic	L1PA16|LINE|L1	58396	NM_001039585	5737	Hs.654365	NM_000959	ENSG00000122420	PTGFR	FP	prostaglandin F receptor	protein-coding
MEIS1_in_LV-MEIS1_peak_1086	chr11	106127783	106127783	+	20.7684	NA	intron (NR_135099, intron 1 of 2)	intron (NR_135099, intron 1 of 2)	4333	NR_135099	105369473	Hs.524010	NR_135099	ENSG00000254580	LOC105369473	-	uncharacterized LOC105369473	ncRNA
MEIS1_in_LV-MEIS1_peak_2782	chr2	19071005	19071005	+	20.7684	NA	Intergenic	Intergenic	-44034	NR_135287	400945	Hs.502854	NR_135287	ENSG00000236204	LINC01376	-	long intergenic non-protein coding RNA 1376	ncRNA
MEIS1_in_LV-MEIS1_peak_2468	chr18	50159129	50159129	+	20.7684	NA	intron (NM_001080467, intron 1 of 39)	intron (NM_001080467, intron 1 of 39)	-32566	NR_036204	100422865		NR_036204	ENSG00000283343	MIR4320	-	microRNA 4320	ncRNA
MEIS1_in_LV-MEIS1_peak_1017	chr11	75372513	75372513	+	20.7684	NA	Intergenic	Intergenic	-20682	NM_020251	408	Hs.503284	NM_004041	ENSG00000137486	ARRB1	ARB1|ARR1	arrestin beta 1	protein-coding
MEIS1_in_LV-MEIS1_peak_4035	chr4	100780301	100780301	+	20.7684	NA	Intergenic	Intergenic	-105188	NR_046811	100874275	Hs.136318	NR_046811	ENSG00000250223	LINC01216	EMCN-IT3	long intergenic non-protein coding RNA 1216	ncRNA
MEIS1_in_LV-MEIS1_peak_3406	chr3	24129711	24129711	+	20.7684	NA	intron (NM_001252634, intron 10 of 11)	intron (NM_001252634, intron 10 of 11)	-21613	NR_121667	101927854	Hs.570625	NR_121667		LOC101927854	-	uncharacterized LOC101927854	ncRNA
MEIS1_in_LV-MEIS1_peak_5650	chr9	967589	967589	+	20.7684	NA	intron (NM_021951, intron 4 of 4)	intron (NM_021951, intron 4 of 4)	-9379	NM_021240	58524	Hs.189174	NM_021240	ENSG00000064218	DMRT3	DMRTA3	doublesex and mab-3 related transcription factor 3	protein-coding
MEIS1_in_LV-MEIS1_peak_5408	chr8	1971239	1971239	+	20.7684	NA	promoter-TSS (NR_126346)	promoter-TSS (NR_126346)	-158	NR_126346	104266957	Hs.734498	NR_126346	ENSG00000253696	KBTBD11-OT1	-	KBTBD11 overlapping transcript 1	ncRNA
MEIS1_in_LV-MEIS1_peak_4206	chr4	176702225	176702225	+	20.7684	NA	intron (NM_005429, intron 4 of 6)	intron (NM_005429, intron 4 of 6)	90520	NM_005429	7424	Hs.435215	NM_005429	ENSG00000150630	VEGFC	Flt4-L|LMPH1D|VRP	vascular endothelial growth factor C	protein-coding
MEIS1_in_LV-MEIS1_peak_1330	chr12	56646324	56646324	+	20.7684	NA	promoter-TSS (NM_001686)	promoter-TSS (NM_001686)	-256	NM_001686	506	Hs.406510	NM_001686	ENSG00000110955	ATP5F1B	ATP5B|ATPMB|ATPSB|HEL-S-271	ATP synthase F1 subunit beta	protein-coding
MEIS1_in_LV-MEIS1_peak_2281	chr17	28729079	28729079	+	20.7684	NA	intron (NM_178170, intron 1 of 14)	intron (NM_178170, intron 1 of 14)	265	NM_178170	284086	Hs.448468	NM_178170	ENSG00000160602	NEK8	JCK|NEK12A|NPHP9|RHPD2	NIMA related kinase 8	protein-coding
MEIS1_in_LV-MEIS1_peak_60	chr1	24319440	24319440	+	20.7684	NA	promoter-TSS (NM_001195010)	promoter-TSS (NM_001195010)	118	NM_198174	57822	Hs.657920	NM_021180	ENSG00000158055	GRHL3	SOM|TFCP2L4|VWS2	grainyhead like transcription factor 3	protein-coding
MEIS1_in_LV-MEIS1_peak_4195	chr4	169620330	169620330	+	20.7684	NA	promoter-TSS (NM_001243372)	promoter-TSS (NM_001243372)	-191	NM_173872	1182	Hs.481186	NM_001829	ENSG00000109572	CLCN3	CLC3|ClC-3	chloride voltage-gated channel 3	protein-coding
MEIS1_in_LV-MEIS1_peak_2614	chr19	19668686	19668686	+	20.7684	NA	promoter-TSS (NM_033204)	promoter-TSS (NM_033204)	-102	NM_033204	94039	Hs.63187	NM_033204	ENSG00000181896	ZNF101	HZF12	zinc finger protein 101	protein-coding
MEIS1_in_LV-MEIS1_peak_1419	chr12	78067141	78067141	+	20.7581	NA	intron (NM_014903, intron 12 of 38)	intron (NM_014903, intron 12 of 38)	235852	NM_014903	89795	Hs.655301	NM_014903	ENSG00000067798	NAV3	POMFIL1|STEERIN3|unc53H3	neuron navigator 3	protein-coding
MEIS1_in_LV-MEIS1_peak_5024	chr7	30239099	30239099	+	20.698	NA	Intergenic	Intergenic	-45208	NM_147128	223082	Hs.263912	NM_147128	ENSG00000180233	ZNRF2	RNF202	zinc and ring finger 2	protein-coding
MEIS1_in_LV-MEIS1_peak_1686	chr13	66795734	66795734	+	20.672	NA	intron (NM_020403, intron 2 of 3)	intron (NM_020403, intron 2 of 3)	-29435	NR_046527	100874064	Hs.569284	NR_046527	ENSG00000228842	PCDH9-AS2	-	PCDH9 antisense RNA 2	ncRNA
MEIS1_in_LV-MEIS1_peak_5487	chr8	57804407	57804407	+	20.6304	NA	Intergenic	Intergenic	58258	NR_134276	286178	Hs.255156	NR_134276	ENSG00000254139	LOC286178	-	uncharacterized LOC286178	ncRNA
MEIS1_in_LV-MEIS1_peak_786	chr10	75235984	75235984	+	20.6252	NA	promoter-TSS (NM_144589)	promoter-TSS (NM_144589)	28	NM_144589	118881	Hs.355333	NM_144589	ENSG00000165644	COMTD1	-	catechol-O-methyltransferase domain containing 1	protein-coding
MEIS1_in_LV-MEIS1_peak_5413	chr8	8420960	8420960	+	20.6252	NA	Intergenic	Intergenic	-39126	NM_001080826	157285	Hs.583863	NM_001080826	ENSG00000275342	PRAG1	NACK|PEAK2|PRAGMIN|SGK223	PEAK1 related, kinase-activating pseudokinase 1	protein-coding
MEIS1_in_LV-MEIS1_peak_4364	chr5	90309303	90309303	+	20.6252	NA	Intergenic	Intergenic	-19232	NR_120601	101929495	Hs.346679	NR_120601		LINC01339	-	long intergenic non-protein coding RNA 1339	ncRNA
MEIS1_in_LV-MEIS1_peak_1666	chr13	56528621	56528621	+	20.6236	NA	Intergenic	L2c|LINE|L2	-612297	NM_198441	122183	Hs.525056	NM_198441	ENSG00000204919	PRR20A	PRR20	proline rich 20A	protein-coding
MEIS1_in_LV-MEIS1_peak_482	chr1	195245882	195245882	+	20.5897	NA	Intergenic	Intergenic	1336599	NR_039888	100616363		NR_039888	ENSG00000265986	MIR4735	-	microRNA 4735	ncRNA
MEIS1_in_LV-MEIS1_peak_1911	chr14	68191870	68191870	+	20.5785	NA	intron (NM_002877, intron 7 of 10)	intron (NM_002877, intron 7 of 10)	368278	NM_001321815	5890	Hs.172587	NM_002877	ENSG00000182185	RAD51B	R51H2|RAD51L1|REC2	RAD51 paralog B	protein-coding
MEIS1_in_LV-MEIS1_peak_899	chr11	14688425	14688425	+	20.5618	NA	intron (NM_000922, intron 1 of 15)	intron (NM_000922, intron 1 of 15)	44702	NM_000922	5140	Hs.445711	NM_000922	ENSG00000152270	PDE3B	HcGIP1|cGIPDE1	phosphodiesterase 3B	protein-coding
MEIS1_in_LV-MEIS1_peak_201	chr1	102420002	102420002	+	20.5618	NA	Intergenic	Intergenic	-422768	NR_110210	118427	Hs.484475	NM_058170	ENSG00000118733	OLFM3	NOE3|NOELIN3|OPTIMEDIN	olfactomedin 3	protein-coding
MEIS1_in_LV-MEIS1_peak_3852	chr3	197821236	197821236	+	20.5618	NA	intron (NM_032773, intron 4 of 18)	L3|LINE|CR1	30010	NM_032773	84859	Hs.518414	NM_032773	ENSG00000186001	LRCH3	-	leucine rich repeats and calponin homology domain containing 3	protein-coding
MEIS1_in_LV-MEIS1_peak_283	chr1	148529293	148529293	+	20.5531	NA	Intergenic	tRNA-Asn-AAC|tRNA|tRNA	-46008	NM_001123068	644591	Hs.534674	NM_001123068	ENSG00000236334	PPIAL4G	COAS-2	peptidylprolyl isomerase A like 4G	protein-coding
MEIS1_in_LV-MEIS1_peak_5196	chr7	92834033	92834033	+	20.5232	NA	promoter-TSS (NM_001259)	promoter-TSS (NM_001259)	-116	NM_001259	1021	Hs.119882	NM_001259	ENSG00000105810	CDK6	MCPH12|PLSTIRE	cyclin dependent kinase 6	protein-coding
MEIS1_in_LV-MEIS1_peak_5155	chr7	81835538	81835538	+	20.5057	NA	Intergenic	MER20|DNA|hAT-Charlie	-65340	NM_001010931	3082	Hs.396530	NM_000601	ENSG00000019991	HGF	DFNB39|F-TCF|HGFB|HPTA|SF	hepatocyte growth factor	protein-coding
MEIS1_in_LV-MEIS1_peak_270	chr1	146387878	146387878	+	20.4799	NA	Intergenic	LTR4|LTR|ERV1	11071	NR_004400	26863		NR_004400	ENSG00000206737	RNVU1-18	RNU1-25|RNU1-25P|RNU1-5|RNU1P1|RNU1P9|U1.15|U1P101|U1P15|vU1.18	RNA, variant U1 small nuclear 18	snRNA
MEIS1_in_LV-MEIS1_peak_3734	chr3	164479566	164479566	+	20.4799	NA	Intergenic	Intergenic	-308010	NR_031665	100302148		NR_031665	ENSG00000221251	MIR1263	MIRN1263|hsa-mir-1263	microRNA 1263	ncRNA
MEIS1_in_LV-MEIS1_peak_1550	chr12	117128371	117128371	+	20.4579	NA	intron (NR_120464, intron 2 of 2)	(CTGTCAC)n|Simple_repeat|Simple_repeat	28904	NR_120464	101928244	Hs.742266	NR_120464		TESC-AS1	-	TESC antisense RNA 1 (head to head)	ncRNA
MEIS1_in_LV-MEIS1_peak_3987	chr4	88319148	88319148	+	20.4579	NA	intron (NR_134238, intron 3 of 4)	intron (NR_134238, intron 3 of 4)	34218	NR_134238	105369192	Hs.733660	NR_134236	ENSG00000246375	LOC105369192	-	uncharacterized LOC105369192	ncRNA
MEIS1_in_LV-MEIS1_peak_3484	chr3	60491224	60491224	+	20.4579	NA	intron (NM_002012, intron 5 of 9)	intron (NM_002012, intron 5 of 9)	126646	NR_128708	103504735		NR_128708	ENSG00000281426	MIR548BB	MI0029321|hsa-mir-548bb	microRNA 548bb	ncRNA
MEIS1_in_LV-MEIS1_peak_486	chr1	197557558	197557558	+	20.4125	NA	intron (NM_144977, intron 15 of 15)	intron (NM_144977, intron 15 of 15)	217935	NM_001300858	163486	Hs.125056	NM_019049	ENSG00000213047	DENND1B	C1ORF18|C1orf218|FAM31B	DENN domain containing 1B	protein-coding
MEIS1_in_LV-MEIS1_peak_4199	chr4	175090263	175090263	+	20.4014	NA	Intergenic	MER57C2|LTR|ERV1	171905	NM_001130704	11086	Hs.126838	NM_014269	ENSG00000168594	ADAM29	CT73|svph1	ADAM metallopeptidase domain 29	protein-coding
MEIS1_in_LV-MEIS1_peak_3225	chr21	8378236	8378236	+	20.3975	NA	intron (NR_003287, intron 2 of 2)	MER4A1|LTR|ERV1	-2429	NR_038958	100507412	Hs.426704	NR_038958		LOC100507412	-	uncharacterized LOC100507412	ncRNA
MEIS1_in_LV-MEIS1_peak_33	chr1	16621259	16621259	+	20.3905	NA	intron (NR_026752, intron 5 of 6)	MER91B|DNA|hAT-Tip100	-7654	NM_017940	55672	Hs.467587	NM_017940	ENSG00000219481	NBPF1	AB13|AB14|AB23|AD2|NBG|NBPF	NBPF member 1	protein-coding
MEIS1_in_LV-MEIS1_peak_1247	chr12	45990911	45990911	+	20.3787	NA	promoter-TSS (NM_004719)	promoter-TSS (NM_004719)	-293	NM_004719	9169	Hs.210367	NM_004719	ENSG00000139218	SCAF11	CASP11|SFRS2IP|SIP1|SRRP129|SRSF2IP	SR-related CTD associated factor 11	protein-coding
MEIS1_in_LV-MEIS1_peak_3510	chr3	79575827	79575827	+	20.3392	NA	intron (NM_002941, intron 2 of 30)	intron (NM_002941, intron 2 of 30)	67940	NR_037488	100500877		NR_037488	ENSG00000265193	MIR3923	-	microRNA 3923	ncRNA
MEIS1_in_LV-MEIS1_peak_4284	chr5	39606163	39606163	+	20.3054	NA	Intergenic	Intergenic	85732	NR_104632	101926940	Hs.436359	NR_104632	ENSG00000271334	LINC02104	-	long intergenic non-protein coding RNA 2104	ncRNA
MEIS1_in_LV-MEIS1_peak_1732	chr13	88414772	88414772	+	20.3054	NA	Intergenic	L1ME1|LINE|L1	-126057	NR_047021	100874168	Hs.126406	NR_047021		LINC00433	-	long intergenic non-protein coding RNA 433	ncRNA
MEIS1_in_LV-MEIS1_peak_2409	chr18	4444594	4444594	+	20.3054	NA	intron (NM_001242761, intron 1 of 11)	intron (NM_001242761, intron 1 of 11)	10672	NM_004746	9229	Hs.594640	NM_004746	ENSG00000170579	DLGAP1	DAP-1|DAP-1-ALPHA|DAP-1-BETA|DAP1|DLGAP1A|DLGAP1B|GKAP|SAPAP1	DLG associated protein 1	protein-coding
MEIS1_in_LV-MEIS1_peak_89	chr1	32981818	32981818	+	20.3054	NA	Intergenic	MIR|SINE|MIR	-17005	NM_153341	127544	Hs.591504	NM_153341	ENSG00000116514	RNF19B	IBRDC3|NKLAM	ring finger protein 19B	protein-coding
MEIS1_in_LV-MEIS1_peak_1478	chr12	95733359	95733359	+	20.3054	NA	intron (NM_001329701, intron 3 of 9)	intron (NM_001329701, intron 3 of 9)	56836	NM_001329702	59277	Hs.201034	NM_021229	ENSG00000074527	NTN4	PRO3091	netrin 4	protein-coding
MEIS1_in_LV-MEIS1_peak_972	chr11	59669541	59669541	+	20.3054	NA	promoter-TSS (NM_152716)	promoter-TSS (NM_152716)	-503	NM_152716	219988	Hs.591960	NM_152716	ENSG00000166889	PATL1	Pat1b|hPat1b	PAT1 homolog 1, processing body mRNA decay factor	protein-coding
MEIS1_in_LV-MEIS1_peak_2116	chr16	25298685	25298685	+	20.3054	NA	Intergenic	MIR|SINE|MIR	-41151	NM_001012981	342357	Hs.513451	NM_001012981	ENSG00000155592	ZKSCAN2	ZNF694|ZSCAN31|ZSCAN34	zinc finger with KRAB and SCAN domains 2	protein-coding
MEIS1_in_LV-MEIS1_peak_64	chr1	25459123	25459123	+	20.3054	NA	intron (NM_018202, intron 6 of 10)	intron (NM_018202, intron 6 of 10)	28265	NM_018202	55219	Hs.189782	NM_018202	ENSG00000204178	MACO1	MACOILIN|TMEM57	macoilin 1	protein-coding
MEIS1_in_LV-MEIS1_peak_742	chr10	49871645	49871645	+	20.3054	NA	intron (NR_130168, intron 9 of 18)	intron (NR_130168, intron 9 of 18)	70382	NR_130169	8505	Hs.535298	NM_003631	ENSG00000227345	PARG	PARG99	poly(ADP-ribose) glycohydrolase	protein-coding
MEIS1_in_LV-MEIS1_peak_2177	chr16	64640455	64640455	+	20.3054	NA	Intergenic	L1PA8A|LINE|L1	481682	NM_001797	1009	Hs.116471	NM_001797	ENSG00000140937	CDH11	CAD11|CDHOB|OB|OSF-4	cadherin 11	protein-coding
MEIS1_in_LV-MEIS1_peak_1612	chr13	32985096	32985096	+	20.3054	NA	Intergenic	L2b|LINE|L2	-31337	NM_004795	9365	Hs.524953	NM_004795	ENSG00000133116	KL	-	klotho	protein-coding
MEIS1_in_LV-MEIS1_peak_5270	chr7	108526271	108526271	+	20.3002	NA	promoter-TSS (NM_015723)	promoter-TSS (NM_015723)	47	NM_001256008	50640	Hs.617340	NM_015723	ENSG00000135241	PNPLA8	IPLA2-2|IPLA2G|MMLA|PNPLA-gamma|iPLA2gamma	patatin like phospholipase domain containing 8	protein-coding
MEIS1_in_LV-MEIS1_peak_2025	chr15	56923332	56923332	+	20.2613	NA	intron (NM_207036, intron 3 of 20)	intron (NM_207036, intron 3 of 20)	3541	NM_001322164	6938	Hs.511504	NM_003205	ENSG00000140262	TCF12	CRS3|HEB|HTF4|HsT17266|TCF-12|bHLHb20|p64	transcription factor 12	protein-coding
MEIS1_in_LV-MEIS1_peak_3202	chr20	54149271	54149271	+	20.2521	NA	Intergenic	Intergenic	24706	NM_000782	1591	Hs.89663	NM_000782	ENSG00000019186	CYP24A1	CP24|CYP24|HCAI|HCINF1|P450-CC24	cytochrome P450 family 24 subfamily A member 1	protein-coding
MEIS1_in_LV-MEIS1_peak_2527	chr19	3036305	3036305	+	20.2521	NA	intron (NM_001144761, intron 2 of 19)	CpG	-6691	NM_001144762	7089	Hs.332173	NM_003260	ENSG00000065717	TLE2	ESG|ESG2|GRG2	transducin like enhancer of split 2	protein-coding
MEIS1_in_LV-MEIS1_peak_5582	chr8	102577052	102577052	+	20.2521	NA	Intergenic	LTR16B2|LTR|ERVL	25432	NM_024410	4956	Hs.159274	NM_024410	ENSG00000155087	ODF1	CT133|HSPB10|ODF|ODF2|ODF27|ODFP|ODFPG|ODFPGA|ODFPGB|RT7|SODF	outer dense fiber of sperm tails 1	protein-coding
MEIS1_in_LV-MEIS1_peak_3819	chr3	188036649	188036649	+	20.2521	NA	Intergenic	Intergenic	-60242	NR_135538	105374266	Hs.570518	NR_135537		LINC01991	-	long intergenic non-protein coding RNA 1991	ncRNA
MEIS1_in_LV-MEIS1_peak_1039	chr11	84987999	84987999	+	20.2521	NA	intron (NM_001142699, intron 6 of 27)	L1PB1|LINE|L1	-64578	NM_001364	1740	Hs.367656	NM_001364	ENSG00000150672	DLG2	PPP1R58|PSD-93|PSD93|chapsyn-110	discs large MAGUK scaffold protein 2	protein-coding
MEIS1_in_LV-MEIS1_peak_3615	chr3	117279049	117279049	+	20.2521	NA	Intergenic	Intergenic	357618	NR_121607	100506724	Hs.125983	NR_121607	ENSG00000242385	LINC00901	LSAMP-AS4|TCONS_00005428	long intergenic non-protein coding RNA 901	ncRNA
MEIS1_in_LV-MEIS1_peak_4887	chr6	158468191	158468191	+	20.2521	NA	intron (NM_001007466, intron 6 of 12)	LTR22B|LTR|ERVK	-68245	NM_020823	57583	Hs.99145	NM_020823	ENSG00000146433	TMEM181	GPR178|KIAA1423	transmembrane protein 181	protein-coding
MEIS1_in_LV-MEIS1_peak_34	chr1	16667232	16667232	+	20.2521	NA	promoter-TSS (NR_004408).2	promoter-TSS (NR_004408).2	-284	NR_004430	26871		NR_004430	ENSG00000206652	RNU1-1	HSD1|HU1-1|RNU1|RNU1A|RNU1A3|RNU1G4|Rnu1a1|U1|U1A1	RNA, U1 small nuclear 1	snRNA
MEIS1_in_LV-MEIS1_peak_5061	chr7	46772124	46772124	+	20.2278	NA	Intergenic	L1ME3B|LINE|L1	-75002	NR_134575	730338	Hs.640207	NR_134575	ENSG00000233539	LOC730338	-	uncharacterized LOC730338	ncRNA
MEIS1_in_LV-MEIS1_peak_1227	chr12	27802547	27802547	+	20.2278	NA	3' UTR (NM_020782, exon 3 of 3)	3' UTR (NM_020782, exon 3 of 3)	22293	NM_020782	57542	Hs.505104	NM_020782	ENSG00000087448	KLHL42	Ctb9|KLHDC5	kelch like family member 42	protein-coding
MEIS1_in_LV-MEIS1_peak_5259	chr7	106072145	106072145	+	20.2278	NA	Intergenic	Intergenic	40200	NM_182715	6856	Hs.80919	NM_006754	ENSG00000008282	SYPL1	H-SP1|SYPL	synaptophysin like 1	protein-coding
MEIS1_in_LV-MEIS1_peak_3830	chr3	188948135	188948135	+	20.2254	NA	promoter-TSS (NR_046873)	promoter-TSS (NR_046873)	-496	NR_046873	100874043	Hs.616287	NR_046873	ENSG00000234076	TPRG1-AS1	-	TPRG1 antisense RNA 1	ncRNA
MEIS1_in_LV-MEIS1_peak_4762	chr6	93342472	93342472	+	20.189	NA	intron (NM_004440, intron 5 of 16)	intron (NM_004440, intron 5 of 16)	77110	NM_001288629	2045	Hs.73962	NM_004440	ENSG00000135333	EPHA7	EHK-3|EHK3|EK11|HEK11	EPH receptor A7	protein-coding
MEIS1_in_LV-MEIS1_peak_5396	chr7	152464075	152464075	+	20.1784	NA	promoter-TSS (NR_027387)	promoter-TSS (NR_027387)	-49	NR_027387	100128822	Hs.647112	NR_027387	ENSG00000261455	LINC01003	-	long intergenic non-protein coding RNA 1003	ncRNA
MEIS1_in_LV-MEIS1_peak_1391	chr12	70640915	70640915	+	20.0891	NA	intron (NR_073474, intron 9 of 10)	intron (NR_073474, intron 9 of 10)	-3475	NM_001330204	5787	Hs.201030	NM_002837	ENSG00000127329	PTPRB	HPTP-BETA|HPTPB|PTPB|R-PTP-BETA|VEPTP	protein tyrosine phosphatase, receptor type B	protein-coding
MEIS1_in_LV-MEIS1_peak_491	chr1	198837778	198837778	+	20.0891	NA	intron (NR_040073, intron 2 of 2)	intron (NR_040073, intron 2 of 2)	21204	NR_029612	406955		NR_029612	ENSG00000207975	MIR181B1	MIRN181B1|mir-181b-1	microRNA 181b-1	ncRNA
MEIS1_in_LV-MEIS1_peak_5399	chr7	157461460	157461460	+	20.0891	NA	Intergenic	HERV17-int|LTR|ERV1	-4771	NR_110157	101927914	Hs.623826	NR_110157	ENSG00000234210	LOC101927914	-	uncharacterized LOC101927914	ncRNA
MEIS1_in_LV-MEIS1_peak_1174	chr12	12721354	12721354	+	20.0891	NA	3' UTR (NM_004064, exon 3 of 3)	3' UTR (NM_004064, exon 3 of 3)	4084	NM_004064	1027	Hs.238990	NM_004064	ENSG00000111276	CDKN1B	CDKN4|KIP1|MEN1B|MEN4|P27KIP1	cyclin dependent kinase inhibitor 1B	protein-coding
MEIS1_in_LV-MEIS1_peak_4943	chr7	9995336	9995336	+	20.0891	NA	Intergenic	L2a|LINE|L2	361066	NR_002790	168741	Hs.545134	NR_002790		PER4	-	period circadian regulator 3 pseudogene	pseudo
MEIS1_in_LV-MEIS1_peak_637	chr1	235237495	235237495	+	20.0891	NA	intron (NR_135074, intron 8 of 24)	intron (NR_135074, intron 8 of 24)	-47379	NR_039908	100616224		NR_039908	ENSG00000263439	MIR4753	mir-4753	microRNA 4753	ncRNA
MEIS1_in_LV-MEIS1_peak_4957	chr7	14340381	14340381	+	20.0652	NA	intron (NM_145695, intron 21 of 23)	intron (NM_145695, intron 21 of 23)	-348956	NM_001163148	2115	Hs.22634	NM_004956	ENSG00000006468	ETV1	ER81	ETS variant 1	protein-coding
MEIS1_in_LV-MEIS1_peak_5109	chr7	66996596	66996596	+	20.0617	NA	promoter-TSS (NM_016038)	promoter-TSS (NM_016038)	-209	NM_018264	55253	Hs.520917	NM_018264	ENSG00000198874	TYW1	RSAFD1|TYW1A|YPL207W	tRNA-yW synthesizing protein 1 homolog	protein-coding
MEIS1_in_LV-MEIS1_peak_4300	chr5	53339237	53339237	+	20.0457	NA	Intergenic	Intergenic	-141197	NM_013409	10468	Hs.9914	NM_006350	ENSG00000134363	FST	FS	follistatin	protein-coding
MEIS1_in_LV-MEIS1_peak_3800	chr3	181851353	181851353	+	20.0404	NA	Intergenic	Intergenic	-101011	NR_104146	100996490	Hs.606987	NR_104146	ENSG00000242512	LINC01206	-	long intergenic non-protein coding RNA 1206	ncRNA
MEIS1_in_LV-MEIS1_peak_3718	chr3	158696913	158696913	+	20.0404	NA	TTS (NM_206963)	TTS (NM_206963)	-24220	NM_020169	56925	Hs.478067	NM_020169	ENSG00000079257	LXN	ECI|TCI	latexin	protein-coding
MEIS1_in_LV-MEIS1_peak_1167	chr12	11684239	11684239	+	20.0349	NA	intron (NM_001987, intron 1 of 7)	intron (NM_001987, intron 1 of 7)	34385	NM_001987	2120	Hs.504765	NM_001987	ENSG00000139083	ETV6	TEL|TEL/ABL|THC5	ETS variant 6	protein-coding
MEIS1_in_LV-MEIS1_peak_5108	chr7	66995599	66995599	+	20.0349	NA	promoter-TSS (NM_016038)	promoter-TSS (NM_016038)	2	NM_016038	51119	Hs.110445	NM_016038	ENSG00000126524	SBDS	CGI-97|SDS|SWDS	SBDS, ribosome maturation factor	protein-coding
MEIS1_in_LV-MEIS1_peak_1328	chr12	56636365	56636365	+	20.0349	NA	promoter-TSS (NM_013449)	promoter-TSS (NM_013449)	14	NM_013449	11176	Hs.314263	NM_013449	ENSG00000076108	BAZ2A	TIP5|WALp3	bromodomain adjacent to zinc finger domain 2A	protein-coding
MEIS1_in_LV-MEIS1_peak_1444	chr12	87651123	87651123	+	19.9829	NA	Intergenic	Intergenic	133588	NR_033410	400058	Hs.572212	NR_033410		MKRN9P	MKRN5|MKRN9|MKRNP6|RNF65|ZNF127L3	makorin ring finger protein 9, pseudogene	pseudo
MEIS1_in_LV-MEIS1_peak_1376	chr12	66302282	66302282	+	19.9627	NA	promoter-TSS (NR_135080)	promoter-TSS (NR_135080)	-263	NR_135080	92797	Hs.505941	NM_033647	ENSG00000127311	HELB	DHB|hDHB	DNA helicase B	protein-coding
MEIS1_in_LV-MEIS1_peak_358	chr1	159971185	159971185	+	19.869	NA	intron (NR_038849, intron 1 of 2)	MER77B|LTR|ERVL	9961	NR_038849	100505633	Hs.445045	NR_038849	ENSG00000224259	LINC01133	-	long intergenic non-protein coding RNA 1133	ncRNA
MEIS1_in_LV-MEIS1_peak_5376	chr7	143620854	143620854	+	19.8213	NA	promoter-TSS (NM_001130025)	promoter-TSS (NM_001130025)	-98	NM_001130025	285966	Hs.743565	NM_173678	ENSG00000170379	TCAF2	FAM115C|FAM139A|GATD9	TRPM8 channel associated factor 2	protein-coding
MEIS1_in_LV-MEIS1_peak_5359	chr7	135074299	135074299	+	19.7818	NA	intron (NR_144293, intron 7 of 10)	MLT1K|LTR|ERVL-MaLR	-73715	NM_018295	55281	Hs.521213	NM_018295	ENSG00000146859	TMEM140	-	transmembrane protein 140	protein-coding
MEIS1_in_LV-MEIS1_peak_4657	chr6	41895345	41895345	+	19.7818	NA	promoter-TSS (NM_018561)	promoter-TSS (NM_018561)	16	NM_018561	25862	Hs.593575	NM_018561	ENSG00000164663	USP49	-	ubiquitin specific peptidase 49	protein-coding
MEIS1_in_LV-MEIS1_peak_475	chr1	193009544	193009544	+	19.7816	NA	Intergenic	MamRep605|LTR?|LTR?	47871	NR_135615	107397392		NR_135615	ENSG00000238754	SCARNA18B	-	small Cajal body-specific RNA 18B	ncRNA
MEIS1_in_LV-MEIS1_peak_5845	chr9	125410358	125410358	+	19.7346	NA	Intergenic	MLT1K|LTR|ERVL-MaLR	111468	NM_001282681	26130	Hs.42376	NM_015635	ENSG00000165219	GAPVD1	GAPEX5|GAPex-5|RAP6	GTPase activating protein and VPS9 domains 1	protein-coding
MEIS1_in_LV-MEIS1_peak_4332	chr5	68549398	68549398	+	19.7346	NA	Intergenic	Intergenic	256830	NM_001242466	5295	Hs.132225	NM_181504	ENSG00000145675	PIK3R1	AGM7|GRB1|IMD36|p85|p85-ALPHA	phosphoinositide-3-kinase regulatory subunit 1	protein-coding
MEIS1_in_LV-MEIS1_peak_939	chr11	37088467	37088467	+	19.7346	NA	Intergenic	Intergenic	-490188	NM_001243786	5897	Hs.714519	NM_000536	ENSG00000175097	RAG2	RAG-2	recombination activating 2	protein-coding
MEIS1_in_LV-MEIS1_peak_2528	chr19	3047837	3047837	+	19.7346	NA	promoter-TSS (NM_001144761)	promoter-TSS (NM_001144761)	-202	NM_001144761	7089	Hs.332173	NM_003260	ENSG00000065717	TLE2	ESG|ESG2|GRG2	transducin like enhancer of split 2	protein-coding
MEIS1_in_LV-MEIS1_peak_5466	chr8	38510263	38510263	+	19.7346	NA	TTS (NM_001303531)	TTS (NM_001303531)	18399	NM_207412	389649	Hs.546586	NM_207412	ENSG00000196166	C8orf86	-	chromosome 8 open reading frame 86	protein-coding
MEIS1_in_LV-MEIS1_peak_3441	chr3	45418612	45418612	+	19.7346	NA	intron (NM_015340, intron 5 of 21)	MER58A|DNA|hAT-Charlie	30029	NM_015340	23395	Hs.526975	NM_015340	ENSG00000011376	LARS2	HLASA|LEURS|PRLTS4|mtLeuRS	leucyl-tRNA synthetase 2, mitochondrial	protein-coding
MEIS1_in_LV-MEIS1_peak_959	chr11	48088417	48088417	+	19.7346	NA	intron (NM_002843, intron 1 of 24)	LTR83|LTR|ERVL	-8365	NR_036119	100423000		NR_036119	ENSG00000263693	MIR3161	-	microRNA 3161	ncRNA
MEIS1_in_LV-MEIS1_peak_884	chr11	7573797	7573797	+	19.7346	NA	intron (NM_003621, intron 3 of 23)	intron (NM_003621, intron 3 of 23)	-23389	NM_001256568	8495	Hs.655714	NM_003621	ENSG00000166387	PPFIBP2	Cclp1	PPFIA binding protein 2	protein-coding
MEIS1_in_LV-MEIS1_peak_2320	chr17	48602797	48602797	+	19.7346	NA	TTS (NR_033202)	TTS (NR_033202)	2175	NM_018952	3216	Hs.98428	NM_018952	ENSG00000108511	HOXB6	HOX2|HOX2B|HU-2|Hox-2.2	homeobox B6	protein-coding
MEIS1_in_LV-MEIS1_peak_4488	chr5	133049823	133049823	+	19.7346	NA	Intergenic	Intergenic	-2147	NM_002154	3308	Hs.90093	NM_002154	ENSG00000170606	HSPA4	APG-2|HEL-S-5a|HS24/P52|HSPH2|RY|hsp70|hsp70RY	heat shock protein family A (Hsp70) member 4	protein-coding
MEIS1_in_LV-MEIS1_peak_3064	chr2	207930923	207930923	+	19.7346	NA	intron (NM_001080475, intron 5 of 7)	CpG	94637	NM_001080475	389072	Hs.159188	NM_001080475	ENSG00000178385	PLEKHM3	DAPR|PLEKHM1L	pleckstrin homology domain containing M3	protein-coding
MEIS1_in_LV-MEIS1_peak_4560	chr5	164518553	164518553	+	19.7346	NA	intron (NR_105065, intron 2 of 3)	intron (NR_105065, intron 2 of 3)	48274	NR_105065	102546299	Hs.437730	NR_105065	ENSG00000241956	LOC102546299	-	uncharacterized LOC102546299	ncRNA
MEIS1_in_LV-MEIS1_peak_5921	chrX	72381906	72381906	+	19.7346	NA	intron (NR_051952, intron 8 of 9)	intron (NR_051952, intron 8 of 9)	-74719	NM_001144886	4435	Hs.40403	NM_004143	ENSG00000125931	CITED1	MSG1	Cbp/p300 interacting transactivator with Glu/Asp rich carboxy-terminal domain 1	protein-coding
MEIS1_in_LV-MEIS1_peak_2713	chr19	50658372	50658372	+	19.7346	NA	TTS (NM_016148)	TTS (NM_016148)	8927	NM_001195076	342918	Hs.531650	NM_001195076	ENSG00000235034	C19orf81	-	chromosome 19 open reading frame 81	protein-coding
MEIS1_in_LV-MEIS1_peak_3183	chr20	41476387	41476387	+	19.7346	NA	intron (NM_032221, intron 16 of 36)	intron (NM_032221, intron 16 of 36)	-109529	NM_052846	90187	Hs.726525	NM_052846	ENSG00000183798	EMILIN3	C20orf130|EMILIN5|dJ620E11.4	elastin microfibril interfacer 3	protein-coding
MEIS1_in_LV-MEIS1_peak_2901	chr2	87534412	87534412	+	19.7346	NA	Intergenic	Intergenic	78957	NR_024206	112597	Hs.652166	NR_024204	ENSG00000222041	CYTOR	C2orf59|LINC00152|NCRNA00152	cytoskeleton regulator RNA	ncRNA
MEIS1_in_LV-MEIS1_peak_4472	chr5	127827614	127827614	+	19.7346	NA	intron (NM_001317938, intron 5 of 6)	intron (NM_001317938, intron 5 of 6)	124225	NM_001317938	728586	Hs.582532	NM_001317938	ENSG00000230561	CCDC192	LINC01183	coiled-coil domain containing 192	protein-coding
MEIS1_in_LV-MEIS1_peak_2876	chr2	71227577	71227577	+	19.7346	NA	promoter-TSS (NM_020459)	promoter-TSS (NM_020459)	-474	NM_020459	400961	Hs.416735	NM_020459	ENSG00000124374	PAIP2B	-	poly(A) binding protein interacting protein 2B	protein-coding
MEIS1_in_LV-MEIS1_peak_208	chr1	108034688	108034688	+	19.7346	NA	Intergenic	Intergenic	-69765	NM_006113	10451	Hs.267659	NM_006113	ENSG00000134215	VAV3	-	vav guanine nucleotide exchange factor 3	protein-coding
MEIS1_in_LV-MEIS1_peak_5917	chrX	68454728	68454728	+	19.7346	NA	Intergenic	AluJb|SINE|Alu	-21271	NM_002547	4983	Hs.128824	NM_002547	ENSG00000079482	OPHN1	ARHGAP41|MRX60|OPN1	oligophrenin 1	protein-coding
MEIS1_in_LV-MEIS1_peak_3010	chr2	186140979	186140979	+	19.7346	NA	Intergenic	Intergenic	-54662	NR_110218	101927217	Hs.130011	NR_110218	ENSG00000237877	LINC01473	-	long intergenic non-protein coding RNA 1473	ncRNA
MEIS1_in_LV-MEIS1_peak_909	chr11	24458166	24458166	+	19.7346	NA	Intergenic	Intergenic	-38804	NM_001009909	338645	Hs.144138	NM_001009909	ENSG00000187398	LUZP2	KFSP2566|PRO6246	leucine zipper protein 2	protein-coding
MEIS1_in_LV-MEIS1_peak_2453	chr18	41751445	41751445	+	19.7346	NA	Intergenic	Intergenic	-203753	NM_001308020	5289	Hs.464971	NM_002647	ENSG00000078142	PIK3C3	VPS34|Vps34|hVps34	phosphatidylinositol 3-kinase catalytic subunit type 3	protein-coding
MEIS1_in_LV-MEIS1_peak_4795	chr6	110682610	110682610	+	19.7346	NA	intron (NM_001300964, intron 2 of 12)	intron (NM_001300964, intron 2 of 12)	-132011	NM_001287215	262	Hs.159118	NM_001634	ENSG00000123505	AMD1	ADOMETDC|AMD|SAMDC	adenosylmethionine decarboxylase 1	protein-coding
MEIS1_in_LV-MEIS1_peak_4875	chr6	145101923	145101923	+	19.7346	NA	Intergenic	Intergenic	-632946	NR_038246	100507557	Hs.124537	NR_038244	ENSG00000235652	LOC100507557	-	uncharacterized LOC100507557	ncRNA
MEIS1_in_LV-MEIS1_peak_4519	chr5	143895679	143895679	+	19.7346	NA	Intergenic	L2a|LINE|L2	83518	NM_021182	57824	Hs.158320	NM_021182	ENSG00000158497	HMHB1	HB-1|HB-1Y|HLA-HB1	histocompatibility minor HB-1	protein-coding
MEIS1_in_LV-MEIS1_peak_2658	chr19	38650030	38650030	+	19.7346	NA	intron (NM_001322033, intron 1 of 20)	intron (NM_001322033, intron 1 of 20)	2414	NM_001322033	81	Hs.270291	NM_004924	ENSG00000130402	ACTN4	ACTININ-4|FSGS|FSGS1	actinin alpha 4	protein-coding
MEIS1_in_LV-MEIS1_peak_5427	chr8	19198727	19198727	+	19.7346	NA	intron (NR_038919, intron 3 of 4)	intron (NR_038919, intron 3 of 4)	46795	NR_038919	100128993	Hs.697742	NR_038919		LOC100128993	-	uncharacterized LOC100128993	ncRNA
MEIS1_in_LV-MEIS1_peak_3921	chr4	53591665	53591665	+	19.7346	NA	promoter-TSS (NM_001126328)	promoter-TSS (NM_001126328)	-79	NM_001126328	84708	Hs.518760	NM_032622	ENSG00000072201	LNX1	LNX|MPDZ|PDZRN2	ligand of numb-protein X 1	protein-coding
MEIS1_in_LV-MEIS1_peak_2570	chr19	11739074	11739074	+	19.7346	NA	promoter-TSS (NM_001080493)	promoter-TSS (NM_001080493)	-65	NM_001297610	55552	Hs.142167	NM_017507	ENSG00000197933	ZNF823	HSZFP36	zinc finger protein 823	protein-coding
MEIS1_in_LV-MEIS1_peak_3052	chr2	200786711	200786711	+	19.7346	NA	intron (NR_135012, intron 29 of 30)	intron (NR_135012, intron 29 of 30)	-24835	NM_001207067	9689	Hs.355983	NM_014670	ENSG00000082153	BZW1	BZAP45|Nbla10236	basic leucine zipper and W2 domains 1	protein-coding
MEIS1_in_LV-MEIS1_peak_2623	chr19	21082091	21082091	+	19.7346	NA	promoter-TSS (NM_182515)	promoter-TSS (NM_182515)	-56	NR_117086	148206	Hs.729186	NM_182515	ENSG00000160352	ZNF714	-	zinc finger protein 714	protein-coding
MEIS1_in_LV-MEIS1_peak_2615	chr19	19733202	19733202	+	19.7346	NA	promoter-TSS (NM_021030)	promoter-TSS (NM_021030)	-90	NM_021030	7561	Hs.659932	NM_021030	ENSG00000105708	ZNF14	GIOT-4|KOX6	zinc finger protein 14	protein-coding
MEIS1_in_LV-MEIS1_peak_1461	chr12	93314858	93314858	+	19.7346	NA	intron (NR_040096, intron 2 of 4)	intron (NR_040096, intron 2 of 4)	62878	NR_040096	643339	Hs.741299	NR_040096		LOC643339	-	uncharacterized LOC643339	ncRNA
MEIS1_in_LV-MEIS1_peak_65	chr1	25501197	25501197	+	19.7346	NA	TTS (NM_001282564)	TTS (NM_001282564)	-42388	NM_015627	26119	Hs.590911	NM_015627	ENSG00000157978	LDLRAP1	ARH|ARH1|ARH2|FHCB1|FHCB2	low density lipoprotein receptor adaptor protein 1	protein-coding
MEIS1_in_LV-MEIS1_peak_1758	chr13	96926093	96926093	+	19.7346	NA	Intergenic	Intergenic	58079	NR_051966	100887754	Hs.617003	NR_051966		LINC00359	-	long intergenic non-protein coding RNA 359	ncRNA
MEIS1_in_LV-MEIS1_peak_2588	chr19	12551607	12551607	+	19.7346	NA	promoter-TSS (NM_144976)	promoter-TSS (NM_144976)	-65	NM_144976	163050	Hs.655615	NM_144976	ENSG00000249709	ZNF564	-	zinc finger protein 564	protein-coding
MEIS1_in_LV-MEIS1_peak_3208	chr20	57773370	57773370	+	19.7346	NA	Intergenic	MER58B|DNA|hAT-Charlie	-61834	NM_199171	56937	Hs.517155	NM_020182	ENSG00000124225	PMEPA1	STAG1|TMEPAI	prostate transmembrane protein, androgen induced 1	protein-coding
MEIS1_in_LV-MEIS1_peak_2340	chr17	58391681	58391681	+	19.7346	NA	intron (NM_001305544, intron 2 of 9)	intron (NM_001305544, intron 2 of 9)	11040	NM_001305545	54894	Hs.584916	NM_017763	ENSG00000108375	RNF43	RNF124|SSPCS|URCC	ring finger protein 43	protein-coding
MEIS1_in_LV-MEIS1_peak_2504	chr18	72771264	72771264	+	19.7346	NA	intron (NM_001201465, intron 7 of 10)	intron (NM_001201465, intron 7 of 10)	82118	NR_049858	100847083		NR_049858	ENSG00000263750	MIR548AV	-	microRNA 548av	ncRNA
MEIS1_in_LV-MEIS1_peak_1664	chr13	54575013	54575013	+	19.7346	NA	Intergenic	Intergenic	-262965	NR_031628	100302187		NR_031628	ENSG00000283126	MIR1297	MIRN1297|hsa-mir-1297|mir-1297	microRNA 1297	ncRNA
MEIS1_in_LV-MEIS1_peak_1916	chr14	69343130	69343130	+	19.7346	NA	intron (NM_020692, intron 12 of 15)	intron (NM_020692, intron 12 of 15)	55174	NM_004450	2079	Hs.509791	NM_004450	ENSG00000100632	ERH	DROER	ERH, mRNA splicing and mitosis factor	protein-coding
MEIS1_in_LV-MEIS1_peak_905	chr11	21567837	21567837	+	19.7346	NA	intron (NM_201551, intron 16 of 18)	CR1-3_Croc|LINE|CR1	-625339	NM_213599	203859	Hs.154329	NM_213599	ENSG00000171714	ANO5	GDD1|LGMD2L|TMEM16E	anoctamin 5	protein-coding
MEIS1_in_LV-MEIS1_peak_1142	chr12	2885490	2885490	+	19.7346	NA	exon (NM_001252499, exon 2 of 3)	exon (NM_001252499, exon 2 of 3)	-5377	NM_001160408	7289	Hs.655333	NM_003324	ENSG00000078246	TULP3	TUBL3	tubby like protein 3	protein-coding
MEIS1_in_LV-MEIS1_peak_5625	chr8	130302584	130302584	+	19.7346	NA	intron (NM_001247996, intron 4 of 30)	intron (NM_001247996, intron 4 of 30)	-6051	NR_002765	29065	Hs.639318	NR_002765		ASAP1-IT1	ASAP1-IT|ASAP1IT|ASAP1IT1|DDEF1IT1|HSPC054|NCRNA00050	ASAP1 intronic transcript 1	ncRNA
MEIS1_in_LV-MEIS1_peak_3476	chr3	56721002	56721002	+	19.7346	NA	Intergenic	L1MEc|LINE|L1	-37895	NM_001112736	23272	Hs.116877	NM_015224	ENSG00000163946	FAM208A	C3orf63|RAP140|TASOR|se89-1	family with sequence similarity 208 member A	protein-coding
MEIS1_in_LV-MEIS1_peak_4126	chr4	138898136	138898136	+	19.7346	NA	intron (NR_133945, intron 2 of 2)	intron (NR_133945, intron 2 of 2)	114510	NR_133945	105377448	Hs.200280	NR_133945	ENSG00000250195	LOC105377448	-	uncharacterized LOC105377448	ncRNA
MEIS1_in_LV-MEIS1_peak_2961	chr2	150100029	150100029	+	19.7346	NA	Intergenic	Intergenic	387666	NM_001254738	390	Hs.6838	NM_005168	ENSG00000115963	RND3	ARHE|Rho8|RhoE|memB	Rho family GTPase 3	protein-coding
MEIS1_in_LV-MEIS1_peak_4018	chr4	95250954	95250954	+	19.7346	NA	intron (NM_003728, intron 4 of 15)	intron (NM_003728, intron 4 of 15)	159463	NM_001256794	658	Hs.598475	NM_001203	ENSG00000138696	BMPR1B	ALK-6|ALK6|AMDD|BDA1D|BDA2|CDw293	bone morphogenetic protein receptor type 1B	protein-coding
MEIS1_in_LV-MEIS1_peak_3974	chr4	83535497	83535497	+	19.7346	NA	promoter-TSS (NM_001256422)	promoter-TSS (NM_001256422)	-417	NM_001256422	84803	Hs.99196	NM_032717	ENSG00000138678	GPAT3	AGPAT 10|AGPAT10|AGPAT8|AGPAT9|HMFN0839|LPAAT-theta|MAG1	glycerol-3-phosphate acyltransferase 3	protein-coding
MEIS1_in_LV-MEIS1_peak_14	chr1	8259261	8259261	+	19.7346	NA	Intergenic	Intergenic	50589	NR_125998	102724539	Hs.516816	NR_125998	ENSG00000227634	LINC01714	-	long intergenic non-protein coding RNA 1714	ncRNA
MEIS1_in_LV-MEIS1_peak_3384	chr3	11480960	11480960	+	19.7346	NA	intron (NM_001136031, intron 17 of 17)	intron (NM_001136031, intron 17 of 17)	87964	NM_001128221	9686	Hs.740389	NM_014667	ENSG00000144560	VGLL4	VGL-4	vestigial like family member 4	protein-coding
MEIS1_in_LV-MEIS1_peak_4628	chr6	26103791	26103791	+	19.7346	NA	promoter-TSS (NM_003542)	promoter-TSS (NM_003542)	-157	NM_003542	8364	Hs.46423	NM_003542	ENSG00000197061	HIST1H4C	H4/g|H4FG|dJ221C16.1	histone cluster 1 H4 family member c	protein-coding
MEIS1_in_LV-MEIS1_peak_4808	chr6	117920622	117920622	+	19.7346	NA	intron (NM_001029858, intron 1 of 7)	MamRep1879|DNA|hAT-Tip100?	13096	NM_001029858	222553	Hs.654841	NM_001029858	ENSG00000196376	SLC35F1	C6orf169|dJ230I3.1	solute carrier family 35 member F1	protein-coding
MEIS1_in_LV-MEIS1_peak_4096	chr4	125666879	125666879	+	19.7346	NA	Intergenic	Intergenic	159620	NR_031746	100302267		NR_031746	ENSG00000283550	MIR2054	hsa-mir-2054	microRNA 2054	ncRNA
MEIS1_in_LV-MEIS1_peak_3907	chr4	40452757	40452757	+	19.7346	NA	intron (NM_001098634, intron 3 of 6)	L2a|LINE|L2	49362	NR_039966	100616274		NR_039966	ENSG00000263642	MIR4802	-	microRNA 4802	ncRNA
MEIS1_in_LV-MEIS1_peak_3408	chr3	24140275	24140275	+	19.7346	NA	intron (NM_001252634, intron 9 of 11)	intron (NM_001252634, intron 9 of 11)	-11049	NR_121667	101927854	Hs.570625	NR_121667		LOC101927854	-	uncharacterized LOC101927854	ncRNA
MEIS1_in_LV-MEIS1_peak_5222	chr7	99472804	99472804	+	19.7346	NA	promoter-TSS (NM_001013258)	promoter-TSS (NM_001013258)	-88	NM_001013258	285989	Hs.440384	NM_213603	ENSG00000198556	ZNF789	-	zinc finger protein 789	protein-coding
MEIS1_in_LV-MEIS1_peak_979	chr11	62242175	62242175	+	19.7346	NA	promoter-TSS (NM_006551)	promoter-TSS (NM_006551)	-77	NM_006551	10647	Hs.204096	NM_006551	ENSG00000124935	SCGB1D2	LIPB|LPHB|LPNB	secretoglobin family 1D member 2	protein-coding
MEIS1_in_LV-MEIS1_peak_861	chr10	122063393	122063393	+	19.7346	NA	intron (NM_206861, intron 3 of 19)	intron (NM_206861, intron 3 of 19)	-49646	NM_001291879	10579	Hs.501252	NM_006997	ENSG00000138162	TACC2	AZU-1|ECTACC	transforming acidic coiled-coil containing protein 2	protein-coding
MEIS1_in_LV-MEIS1_peak_4171	chr4	153794161	153794161	+	19.7346	NA	Intergenic	Intergenic	-5085	NM_003013	6423	Hs.481022	NM_003013	ENSG00000145423	SFRP2	FRP-2|SARP1|SDF-5	secreted frizzled related protein 2	protein-coding
MEIS1_in_LV-MEIS1_peak_2070	chr15	70324196	70324196	+	19.7346	NA	Intergenic	Intergenic	-226279	NM_001105192	7090	Hs.287362	NM_005078	ENSG00000140332	TLE3	ESG|ESG3|GRG3|HsT18976	transducin like enhancer of split 3	protein-coding
MEIS1_in_LV-MEIS1_peak_4248	chr5	19930987	19930987	+	19.7223	NA	intron (NM_001291956, intron 4 of 14)	intron (NM_001291956, intron 4 of 14)	-44715	NM_001291957	1016	Hs.317632	NM_004934	ENSG00000145526	CDH18	CDH14|CDH14L|CDH24	cadherin 18	protein-coding
MEIS1_in_LV-MEIS1_peak_5288	chr7	112630839	112630839	+	19.6761	NA	intron (NR_110158, intron 1 of 7)	L2|LINE|L2	8458	NR_110158	101928012	Hs.521131	NR_110158	ENSG00000223646	LOC101928012	-	uncharacterized LOC101928012	ncRNA
MEIS1_in_LV-MEIS1_peak_3676	chr3	146019756	146019756	+	19.6761	NA	Intergenic	Intergenic	141739	NM_182943	5352	Hs.477866	NM_000935	ENSG00000152952	PLOD2	BRKS2|LH2|TLH	procollagen-lysine,2-oxoglutarate 5-dioxygenase 2	protein-coding
MEIS1_in_LV-MEIS1_peak_105	chr1	40712588	40712588	+	19.6761	NA	intron (NM_001142590, intron 3 of 14)	intron (NM_001142590, intron 3 of 14)	3265	NM_001308115	4802	Hs.713051	NM_014223	ENSG00000066136	NFYC	CBF-C|CBFC|H1TF2A|HAP5|HSM|NF-YC	nuclear transcription factor Y subunit gamma	protein-coding
MEIS1_in_LV-MEIS1_peak_340	chr1	155176657	155176657	+	19.6761	NA	intron (NR_046329, intron 4 of 11)	intron (NR_046329, intron 4 of 11)	1903	NM_001256601	80128	Hs.287735	NM_025058	ENSG00000163462	TRIM46	GENEY|TRIFIC	tripartite motif containing 46	protein-coding
MEIS1_in_LV-MEIS1_peak_3479	chr3	58150523	58150523	+	19.6761	NA	intron (NM_001457, intron 38 of 45)	Charlie26a|DNA|hAT-Charlie	20112	NR_135534	105377105	Hs.613914	NR_135534	ENSG00000244161	FLNB-AS1	-	FLNB antisense RNA 1	ncRNA
MEIS1_in_LV-MEIS1_peak_5018	chr7	27152710	27152710	+	19.6425	NA	non-coding (NR_038832, exon 3 of 3)	non-coding (NR_038832, exon 3 of 3)	3967	NM_006896	3204	Hs.610216	NM_006896	ENSG00000122592	HOXA7	ANTP|HOX1|HOX1.1|HOX1A	homeobox A7	protein-coding
MEIS1_in_LV-MEIS1_peak_416	chr1	178536945	178536945	+	19.6425	NA	Intergenic	Intergenic	-5851	NR_033186	400798	Hs.668085	NM_207467	ENSG00000213057	C1orf220	-	chromosome 1 open reading frame 220 (putative)	ncRNA
MEIS1_in_LV-MEIS1_peak_1660	chr13	51524446	51524446	+	19.6425	NA	Intergenic	Tigger7|DNA|TcMar-Tigger	-28143	NR_039852	100616423		NR_039852	ENSG00000266611	MIR4703	-	microRNA 4703	ncRNA
MEIS1_in_LV-MEIS1_peak_1001	chr11	66958539	66958539	+	19.6425	NA	promoter-TSS (NM_000920)	promoter-TSS (NM_000920)	-163	NM_000920	5091	Hs.89890	NM_000920	ENSG00000173599	PC	PCB	pyruvate carboxylase	protein-coding
MEIS1_in_LV-MEIS1_peak_3227	chr21	9894613	9894613	+	19.5909	NA	Intergenic	Intergenic	-73552	NR_038377	441058	Hs.130535	NR_038377		LINC01667	-	long intergenic non-protein coding RNA 1667	ncRNA
MEIS1_in_LV-MEIS1_peak_3135	chr2	238244225	238244225	+	19.5609	NA	3' UTR (NM_022817, exon 23 of 23)	3' UTR (NM_022817, exon 23 of 23)	-4101	NM_001142853	55502	Hs.42949	NM_018645	ENSG00000144485	HES6	C-HAIRY1|HES-6|bHLHb41|bHLHc23	hes family bHLH transcription factor 6	protein-coding
MEIS1_in_LV-MEIS1_peak_946	chr11	41781857	41781857	+	19.5574	NA	intron (NR_120584, intron 2 of 5)	intron (NR_120584, intron 2 of 5)	67289	NR_120584	102723644	Hs.564283	NR_120584	ENSG00000255171	LINC01499	-	long intergenic non-protein coding RNA 1499	ncRNA
MEIS1_in_LV-MEIS1_peak_3744	chr3	169305654	169305654	+	19.5515	NA	intron (NM_001205194, intron 1 of 15)	intron (NM_001205194, intron 1 of 15)	-142213	NR_134932	105374205		NR_134932	ENSG00000241479	LOC105374205	-	uncharacterized LOC105374205	ncRNA
MEIS1_in_LV-MEIS1_peak_4779	chr6	105678720	105678720	+	19.5515	NA	Intergenic	Intergenic	-275596	NM_002726	5550	Hs.436564	NM_002726	ENSG00000085377	PREP	PE|PEP	prolyl endopeptidase	protein-coding
MEIS1_in_LV-MEIS1_peak_5592	chr8	109474962	109474962	+	19.48	NA	intron (NM_177531, intron 50 of 77)	intron (NM_177531, intron 50 of 77)	-64738	NM_198120	9166	Hs.409368	NM_004215	ENSG00000147654	EBAG9	EB9|PDAF	estrogen receptor binding site associated, antigen, 9	protein-coding
MEIS1_in_LV-MEIS1_peak_1481	chr12	97159750	97159750	+	19.4677	NA	Intergenic	Intergenic	252284	NM_001135175	121441	Hs.270084	NM_152905	ENSG00000139350	NEDD1	GCP-WD|TUBGCP7	neural precursor cell expressed, developmentally down-regulated 1	protein-coding
MEIS1_in_LV-MEIS1_peak_5326	chr7	121916444	121916444	+	19.466	NA	intron (NM_001206839, intron 1 of 28)	intron (NM_001206839, intron 1 of 28)	43339	NM_002851	5803	Hs.489824	NM_002851	ENSG00000106278	PTPRZ1	HPTPZ|HPTPzeta|PTP-ZETA|PTP18|PTPRZ|PTPZ|R-PTP-zeta-2|RPTPB|RPTPbeta|phosphacan	protein tyrosine phosphatase, receptor type Z1	protein-coding
MEIS1_in_LV-MEIS1_peak_4461	chr5	126365676	126365676	+	19.4581	NA	intron (NM_001146319, intron 1 of 13)	MER63A|DNA|hAT-Blackjack	5580	NM_001146319	65983	Hs.363558	NM_023927	ENSG00000155324	GRAMD2B	GRAMD3|NS3TP2	GRAM domain containing 2B	protein-coding
MEIS1_in_LV-MEIS1_peak_3360	chr22	49951415	49951415	+	19.4581	NA	Intergenic	Intergenic	-9080	NM_001001852	415116	Hs.530381	NM_001001852	ENSG00000198355	PIM3	pim-3	Pim-3 proto-oncogene, serine/threonine kinase	protein-coding
MEIS1_in_LV-MEIS1_peak_1081	chr11	102783842	102783842	+	19.4581	NA	non-coding (NR_038390, exon 1 of 8)	non-coding (NR_038390, exon 1 of 8)	166	NR_038390	100288077	Hs.661772	NR_038390	ENSG00000255282	WTAPP1	-	Wilms tumor 1 associated protein pseudogene 1	pseudo
MEIS1_in_LV-MEIS1_peak_5033	chr7	36262893	36262893	+	19.4581	NA	intron (NM_030636, intron 3 of 7)	MER50|LTR|ERV1	104280	NM_001199707	23366	Hs.6224	NM_015314	ENSG00000164542	KIAA0895	-	KIAA0895	protein-coding
MEIS1_in_LV-MEIS1_peak_619	chr1	231602220	231602220	+	19.4492	NA	intron (NR_034037, intron 1 of 1)	intron (NR_034037, intron 1 of 1)	9870	NR_034037	100287814	Hs.25555	NR_034037	ENSG00000229228	LINC00582	-	long intergenic non-protein coding RNA 582	ncRNA
MEIS1_in_LV-MEIS1_peak_5473	chr8	42152910	42152910	+	19.4416	NA	promoter-TSS (NM_001134296)	promoter-TSS (NM_001134296)	-36	NM_001134296	10947	Hs.654529	NM_006803	ENSG00000070718	AP3M2	AP47B|CLA20|P47B	adaptor related protein complex 3 subunit mu 2	protein-coding
MEIS1_in_LV-MEIS1_peak_5383	chr7	146699173	146699173	+	19.4416	NA	intron (NM_014141, intron 1 of 23)	L1MCa|LINE|L1	398436	NR_110829	101928700	Hs.571218	NR_110829	ENSG00000236795	LOC101928700	-	uncharacterized LOC101928700	ncRNA
MEIS1_in_LV-MEIS1_peak_4422	chr5	116024374	116024374	+	19.402	NA	intron (NM_173800, intron 19 of 19)	intron (NM_173800, intron 19 of 19)	-27092	NM_001195581	644100	Hs.98288	NM_001195581	ENSG00000268223	ARL14EPL	-	ADP ribosylation factor like GTPase 14 effector protein like	protein-coding
MEIS1_in_LV-MEIS1_peak_200	chr1	102190650	102190650	+	19.402	NA	Intergenic	Intergenic	-193416	NR_110210	118427	Hs.484475	NM_058170	ENSG00000118733	OLFM3	NOE3|NOELIN3|OPTIMEDIN	olfactomedin 3	protein-coding
MEIS1_in_LV-MEIS1_peak_503	chr1	202010417	202010417	+	19.3832	NA	promoter-TSS (NM_004433)	promoter-TSS (NM_004433)	-145	NM_001114309	1999	Hs.603657	NM_004433	ENSG00000163435	ELF3	EPR-1|ERT|ESE-1|ESX	E74 like ETS transcription factor 3	protein-coding
MEIS1_in_LV-MEIS1_peak_1528	chr12	110614103	110614103	+	19.3832	NA	promoter-TSS (NM_001319682)	promoter-TSS (NM_001319682)	76	NM_001173976	79600	Hs.211511	NM_024549	ENSG00000204852	TCTN1	JBTS13|TECT1	tectonic family member 1	protein-coding
MEIS1_in_LV-MEIS1_peak_5706	chr9	34612178	34612178	+	19.3832	NA	promoter-TSS (NM_148178)	promoter-TSS (NM_148178)	-65	NM_148179	138716	Hs.15961	NM_148178	ENSG00000164967	RPP25L	C9orf23|bA296L22.5	ribonuclease P/MRP subunit p25 like	protein-coding
MEIS1_in_LV-MEIS1_peak_5211	chr7	96596291	96596291	+	19.3831	NA	Intergenic	Intergenic	68047	NR_038948	7979	Hs.489201	NM_006304	ENSG00000127922	SEM1	C7orf76|DSS1|ECD|SHFD1|SHFM1|SHSF1|Shfdg1	SEM1, 26S proteasome complex subunit	protein-coding
MEIS1_in_LV-MEIS1_peak_5682	chr9	24961975	24961975	+	19.3756	NA	Intergenic	Intergenic	-416299	NM_001271706	100129669	Hs.573530	NM_001271706	ENSG00000205442	IZUMO3	C9orf134|bA20A20.1	IZUMO family member 3	protein-coding
MEIS1_in_LV-MEIS1_peak_1008	chr11	67548812	67548812	+	19.3107	NA	Intergenic	MLT1H|LTR|ERVL-MaLR	-25384	NM_001318496	51475	Hs.278984	NM_016366	ENSG00000167791	CABP2	DFNB93	calcium binding protein 2	protein-coding
MEIS1_in_LV-MEIS1_peak_3787	chr3	177420904	177420904	+	19.3107	NA	Intergenic	Tigger12A|DNA|TcMar-Tigger	-21017	NR_047568	100505566	Hs.581170	NR_047568		LINC00578	-	long intergenic non-protein coding RNA 578	ncRNA
MEIS1_in_LV-MEIS1_peak_2933	chr2	112869501	112869501	+	19.3107	NA	Intergenic	Intergenic	-32722	NM_000576	3553	Hs.126256	NM_000576	ENSG00000125538	IL1B	IL-1|IL1-BETA|IL1F2	interleukin 1 beta	protein-coding
MEIS1_in_LV-MEIS1_peak_5946	chrX	117969448	117969448	+	19.3107	NA	intron (NM_001168303, intron 1 of 6)	intron (NM_001168303, intron 1 of 6)	4290	NM_033495	90293	Hs.348262	NM_033495	ENSG00000003096	KLHL13	BKLHD2	kelch like family member 13	protein-coding
MEIS1_in_LV-MEIS1_peak_1015	chr11	74071239	74071239	+	19.3107	NA	intron (NM_015531, intron 24 of 30)	intron (NM_015531, intron 24 of 30)	-62002	NM_003356	7352	Hs.101337	NM_003356	ENSG00000175564	UCP3	SLC25A9	uncoupling protein 3	protein-coding
MEIS1_in_LV-MEIS1_peak_2581	chr19	12156825	12156825	+	19.3107	NA	promoter-TSS (NR_037802)	promoter-TSS (NR_037802)	-94	NM_145233	90589	Hs.732736	NM_145233	ENSG00000257591	ZNF625	-	zinc finger protein 625	protein-coding
MEIS1_in_LV-MEIS1_peak_1299	chr12	53366129	53366129	+	19.3107	NA	Intergenic	Intergenic	-14066	NM_001251825	6667	Hs.620754	NM_003109	ENSG00000185591	SP1	-	Sp1 transcription factor	protein-coding
MEIS1_in_LV-MEIS1_peak_1504	chr12	102879333	102879333	+	19.3107	NA	intron (NM_000277, intron 3 of 12)	intron (NM_000277, intron 3 of 12)	38270	NM_000277	5053	Hs.560019	NM_000277	ENSG00000171759	PAH	PH|PKU|PKU1	phenylalanine hydroxylase	protein-coding
MEIS1_in_LV-MEIS1_peak_723	chr10	35690655	35690655	+	19.296	NA	Intergenic	Intergenic	-49221	NM_031866	8325	Hs.302634	NM_031866	ENSG00000177283	FZD8	FZ-8|hFZ8	frizzled class receptor 8	protein-coding
MEIS1_in_LV-MEIS1_peak_2041	chr15	63677774	63677774	+	19.296	NA	intron (NM_003922, intron 37 of 77)	intron (NM_003922, intron 37 of 77)	-76947	NR_034080	100130855	Hs.631163	NR_034080	ENSG00000259248	USP3-AS1	-	USP3 antisense RNA 1	ncRNA
MEIS1_in_LV-MEIS1_peak_2241	chr17	7886163	7886163	+	19.296	NA	promoter-TSS (NM_001330111)	promoter-TSS (NM_001330111)	-775	NM_001330111	84316	Hs.565094	NM_032356	ENSG00000183011	NAA38	LSMD1|PFAAP2	N(alpha)-acetyltransferase 38, NatC auxiliary subunit	protein-coding
MEIS1_in_LV-MEIS1_peak_2868	chr2	68946243	68946243	+	19.296	NA	intron (NM_182536, intron 5 of 5)	L2b|LINE|L2	6727	NM_182536	200504	Hs.16757	NM_182536	ENSG00000183607	GKN2	BRICD1B|GDDR|PRO813|TFIZ1|VLTI465	gastrokine 2	protein-coding
MEIS1_in_LV-MEIS1_peak_1098	chr11	110076864	110076864	+	19.296	NA	Intergenic	Intergenic	-16497	NM_033390	85463	Hs.376289	NM_033390	ENSG00000149289	ZC3H12C	MCPIP3	zinc finger CCCH-type containing 12C	protein-coding
MEIS1_in_LV-MEIS1_peak_1746	chr13	94122429	94122429	+	19.296	NA	intron (NM_005708, intron 4 of 8)	intron (NM_005708, intron 4 of 8)	65562	NR_046535	100873972	Hs.670344	NR_046535	ENSG00000236520	GPC6-AS1	-	GPC6 antisense RNA 1	ncRNA
MEIS1_in_LV-MEIS1_peak_3371	chr2_KI270767v1_alt	157704	157704	+	19.296	NA	intron (NR_130699, intron 2 of 2).2	intron (NR_130699, intron 2 of 2).2	25001	NR_130699	728323	Hs.380737	NR_024437		LINC01881	-	long intergenic non-protein coding RNA 1881	ncRNA
MEIS1_in_LV-MEIS1_peak_2034	chr15	61750529	61750529	+	19.296	NA	Intergenic	Intergenic	309936	NM_018080	54832	Hs.511668	NM_017684	ENSG00000129003	VPS13C	PARK23	vacuolar protein sorting 13 homolog C	protein-coding
MEIS1_in_LV-MEIS1_peak_3646	chr3	130832184	130832184	+	19.296	NA	Intergenic	L1P1|LINE|L1	-18341	NM_001199180	27032	Hs.584884	NM_014382	ENSG00000017260	ATP2C1	ATP2C1A|BCPM|HHD|PMR1|SPCA1|hSPCA1	ATPase secretory pathway Ca2+ transporting 1	protein-coding
MEIS1_in_LV-MEIS1_peak_4399	chr5	103669852	103669852	+	19.296	NA	Intergenic	Intergenic	-107051	NM_001300741	83594	Hs.434289	NM_031438	ENSG00000112874	NUDT12	-	nudix hydrolase 12	protein-coding
MEIS1_in_LV-MEIS1_peak_2687	chr19	46863975	46863975	+	19.296	NA	Intergenic	Intergenic	-12980	NM_021575	1175	Hs.119591	NM_004069	ENSG00000042753	AP2S1	AP17|CLAPS2|FBH3|FBHOk|HHC3	adaptor related protein complex 2 subunit sigma 1	protein-coding
MEIS1_in_LV-MEIS1_peak_2894	chr2	85369714	85369714	+	19.296	NA	intron (NM_001329792, intron 6 of 12)	intron (NM_001329792, intron 6 of 12)	14994	NR_138133	84173	Hs.269990	NM_032213	ENSG00000115459	ELMOD3	DFNB88|LST3|RBED1|RBM29	ELMO domain containing 3	protein-coding
MEIS1_in_LV-MEIS1_peak_3909	chr4	41346942	41346942	+	19.296	NA	Intergenic	L1MEd|LINE|L1	-12665	NM_001289124	22998	Hs.335163	NM_014988	ENSG00000064042	LIMCH1	LIMCH1A|LMO7B	LIM and calponin homology domains 1	protein-coding
MEIS1_in_LV-MEIS1_peak_713	chr10	28818978	28818978	+	19.296	NA	Intergenic	Intergenic	-22928	NR_038374	100507605	Hs.119207	NR_038374	ENSG00000235824	LINC00837	-	long intergenic non-protein coding RNA 837	ncRNA
MEIS1_in_LV-MEIS1_peak_3380	chr3	9142548	9142548	+	19.296	NA	intron (NM_014850, intron 1 of 21)	intron (NM_014850, intron 1 of 21)	-49945	NR_121664	101927416	Hs.475364	NR_121663	ENSG00000228723	SRGAP3-AS2	-	SRGAP3 antisense RNA 2	ncRNA
MEIS1_in_LV-MEIS1_peak_2023	chr15	55204563	55204563	+	19.296	NA	3' UTR (NM_183234, exon 7 of 7)	3' UTR (NM_183234, exon 7 of 7)	-7530	NM_016304	51187	Hs.274772	NM_016304	ENSG00000137876	RSL24D1	C15orf15|HRP-L30-iso|L30|RLP24|RPL24|RPL24L|TVAS3	ribosomal L24 domain containing 1	protein-coding
MEIS1_in_LV-MEIS1_peak_2491	chr18	67133787	67133787	+	19.2921	NA	Intergenic	Intergenic	52203	NR_049809	100847002		NR_049809	ENSG00000263354	MIR5011	-	microRNA 5011	ncRNA
MEIS1_in_LV-MEIS1_peak_3777	chr3	175091619	175091619	+	19.2921	NA	intron (NR_046390, intron 2 of 3)	LTR106_Mam|LTR|LTR	23623	NR_046390	100862679	Hs.148810	NR_046390	ENSG00000230292	NAALADL2-AS3	-	NAALADL2 antisense RNA 3	ncRNA
MEIS1_in_LV-MEIS1_peak_3509	chr3	79477434	79477434	+	19.2921	NA	intron (NM_002941, intron 2 of 30)	intron (NM_002941, intron 2 of 30)	-30453	NR_037488	100500877		NR_037488	ENSG00000265193	MIR3923	-	microRNA 3923	ncRNA
MEIS1_in_LV-MEIS1_peak_3597	chr3	107116012	107116012	+	19.2729	NA	intron (NR_028303, intron 2 of 3)	L2a|LINE|L2	124626	NR_028303	100302640	Hs.648607	NR_028303	ENSG00000242759	LINC00882	-	long intergenic non-protein coding RNA 882	ncRNA
MEIS1_in_LV-MEIS1_peak_4116	chr4	134426993	134426993	+	19.2518	NA	Intergenic	Intergenic	-225245	NM_001114734	132430	Hs.49889	NM_001114734	ENSG00000254535	PABPC4L	-	poly(A) binding protein cytoplasmic 4 like	protein-coding
MEIS1_in_LV-MEIS1_peak_4158	chr4	146436445	146436445	+	19.2173	NA	intron (NM_001317816, intron 4 of 10)	intron (NM_001317816, intron 4 of 10)	27862	NR_107003	102465837		NR_107003	ENSG00000278438	MIR7849	hsa-mir-7849	microRNA 7849	ncRNA
MEIS1_in_LV-MEIS1_peak_3523	chr3	84548889	84548889	+	19.1748	NA	Intergenic	L1PA16|LINE|L1	320686	NR_033860	440970	Hs.411049	NR_033860	ENSG00000242641	LINC00971	-	long intergenic non-protein coding RNA 971	ncRNA
MEIS1_in_LV-MEIS1_peak_372	chr1	162790500	162790500	+	19.1597	NA	promoter-TSS (NM_001304512)	promoter-TSS (NM_001304512)	-202	NM_016371	51478	Hs.492925	NM_016371	ENSG00000132196	HSD17B7	PRAP|SDR37C1	hydroxysteroid 17-beta dehydrogenase 7	protein-coding
MEIS1_in_LV-MEIS1_peak_5690	chr9	28927891	28927891	+	19.1398	NA	intron (NM_001258282, intron 2 of 6)	MIR|SINE|MIR	-38936	NR_030618	100126316		NR_030618	ENSG00000215939	MIR873	MIRN873|hsa-mir-873|mir-873	microRNA 873	ncRNA
MEIS1_in_LV-MEIS1_peak_5361	chr7	135218127	135218127	+	19.1266	NA	Intergenic	Intergenic	-6563	NM_014149	29062	Hs.459858	NM_014149	ENSG00000105875	WDR91	HSPC049|SORF-1|SORF1	WD repeat domain 91	protein-coding
MEIS1_in_LV-MEIS1_peak_5112	chr7	67189970	67189970	+	19.0939	NA	intron (NM_018264, intron 14 of 15)	Tigger16a|DNA|TcMar-Tigger	-75573	NR_039794	100616331		NR_039794	ENSG00000264494	MIR4650-2	-	microRNA 4650-2	ncRNA
MEIS1_in_LV-MEIS1_peak_1994	chr15	40323323	40323323	+	19.0867	NA	promoter-TSS (NM_001301268)	promoter-TSS (NM_001301268)	-733	NM_001301268	100505573	Hs.530791	NM_001301268	ENSG00000259330	INAFM2	LINC00984|OGU1	InaF motif containing 2	protein-coding
MEIS1_in_LV-MEIS1_peak_4939	chr7	8409121	8409121	+	19.0726	NA	Intergenic	Intergenic	-24834	NM_152745	30010	Hs.487564	NM_152745	ENSG00000122584	NXPH1	NPH1|Nbla00697	neurexophilin 1	protein-coding
MEIS1_in_LV-MEIS1_peak_3610	chr3	114789899	114789899	+	19.0726	NA	intron (NM_001164343, intron 4 of 11)	intron (NM_001164343, intron 4 of 11)	-30622	NM_001164344	26137	Hs.202577	NM_015642	ENSG00000181722	ZBTB20	DPZF|HOF|ODA-8S|PRIMS|ZNF288	zinc finger and BTB domain containing 20	protein-coding
MEIS1_in_LV-MEIS1_peak_469	chr1	192668663	192668663	+	19.0097	NA	Intergenic	L1PA6|LINE|L1	32525	NM_002927	6003	Hs.497220	NM_002927	ENSG00000127074	RGS13	-	regulator of G protein signaling 13	protein-coding
MEIS1_in_LV-MEIS1_peak_272	chr1	147085004	147085004	+	18.9689	NA	promoter-TSS (NR_121645)	promoter-TSS (NR_121645)	-248	NR_121645	101447996		NR_121645		RNVU1-8	RNU1-145|vU1.8	RNA, variant U1 small nuclear 8	snRNA
MEIS1_in_LV-MEIS1_peak_262	chr1	145958068	145958068	+	18.9679	NA	promoter-TSS (NM_153713)	promoter-TSS (NM_153713)	-49	NM_153713	128077	Hs.740619	NM_153713	ENSG00000271601	LIX1L	-	limb and CNS expressed 1 like	protein-coding
MEIS1_in_LV-MEIS1_peak_5023	chr7	30026857	30026857	+	18.9441	NA	promoter-TSS (NM_017946)	promoter-TSS (NM_017946)	-56	NM_017946	55033	Hs.390838	NM_017946	ENSG00000106080	FKBP14	EDSKMH|EDSKSCL2|FKBP22|IPBP12	FK506 binding protein 14	protein-coding
MEIS1_in_LV-MEIS1_peak_5285	chr7	111805485	111805485	+	18.9081	NA	intron (NM_014705, intron 30 of 51)	intron (NM_014705, intron 30 of 51)	-3020	NR_103806	100506413	Hs.677513	NR_103806	ENSG00000225572	DOCK4-AS1	-	DOCK4 antisense RNA 1	ncRNA
MEIS1_in_LV-MEIS1_peak_603	chr1	227563807	227563807	+	18.879	NA	intron (NR_033184, intron 1 of 3)	CpG	288	NM_178549	339500	Hs.30323	NM_032755	ENSG00000181450	ZNF678	-	zinc finger protein 678	protein-coding
MEIS1_in_LV-MEIS1_peak_4985	chr7	20573848	20573848	+	18.8727	NA	Intergenic	Intergenic	-41774	NM_001163941	340273	Hs.404102	NM_178559	ENSG00000004846	ABCB5	ABCB5alpha|ABCB5beta|EST422562	ATP binding cassette subfamily B member 5	protein-coding
MEIS1_in_LV-MEIS1_peak_184	chr1	92325033	92325033	+	18.8727	NA	intron (NM_024813, intron 8 of 12)	MIRb|SINE|MIR	-26024	NM_001319683	11146	Hs.49105	NM_007070	ENSG00000174842	GLMN	FAP|FAP48|FAP68|FKBPAP|GLML|GVM|VMGLOM	glomulin, FKBP associated protein	protein-coding
MEIS1_in_LV-MEIS1_peak_3498	chr3	73542392	73542392	+	18.861	NA	intron (NR_121660, intron 1 of 1)	intron (NR_121660, intron 1 of 1)	19286	NM_001303140	23024	Hs.660347	NM_015009	ENSG00000121440	PDZRN3	LNX3|SEMACAP3|SEMCAP3	PDZ domain containing ring finger 3	protein-coding
MEIS1_in_LV-MEIS1_peak_312	chr1	151494917	151494917	+	18.8491	NA	Intergenic	Intergenic	-16469	NM_020770	57530	Hs.591464	NM_020770	ENSG00000143375	CGN	-	cingulin	protein-coding
MEIS1_in_LV-MEIS1_peak_5344	chr7	125484900	125484900	+	18.8081	NA	Intergenic	L1MC2|LINE|L1	-220609	NR_110182	101928254	Hs.571236	NR_110182	ENSG00000219445	LOC101928254	-	uncharacterized LOC101928254	ncRNA
MEIS1_in_LV-MEIS1_peak_1173	chr12	12717308	12717308	+	18.7996	NA	promoter-TSS (NM_004064)	promoter-TSS (NM_004064)	38	NM_004064	1027	Hs.238990	NM_004064	ENSG00000111276	CDKN1B	CDKN4|KIP1|MEN1B|MEN4|P27KIP1	cyclin dependent kinase inhibitor 1B	protein-coding
MEIS1_in_LV-MEIS1_peak_4901	chr6	170553881	170553881	+	18.7831	NA	promoter-TSS (NM_002793)	promoter-TSS (NM_002793)	-452	NM_001172085	6908	Hs.590872	NM_003194	ENSG00000112592	TBP	GTF2D|GTF2D1|HDL4|SCA17|TFIID	TATA-box binding protein	protein-coding
MEIS1_in_LV-MEIS1_peak_4445	chr5	120053446	120053446	+	18.7831	NA	Intergenic	Intergenic	-410832	NM_001300783	51334	Hs.157461	NM_016644	ENSG00000184838	PRR16	DSC54|LARGEN	proline rich 16	protein-coding
MEIS1_in_LV-MEIS1_peak_5832	chr9	121367411	121367411	+	18.7831	NA	intron (NR_073037, intron 1 of 7)	intron (NR_073037, intron 1 of 7)	2893	NM_198194	2040	Hs.253903	NM_004099	ENSG00000148175	STOM	BND7|EPB7|EPB72	stomatin	protein-coding
MEIS1_in_LV-MEIS1_peak_2510	chr18	75210728	75210728	+	18.7831	NA	promoter-TSS (NM_005786)	promoter-TSS (NM_005786)	-27	NM_005786	10194	Hs.284217	NM_005786	ENSG00000179981	TSHZ1	CAA|NY-CO-33|SDCCAG33|TSH1	teashirt zinc finger homeobox 1	protein-coding
MEIS1_in_LV-MEIS1_peak_5599	chr8	112456865	112456865	+	18.7831	NA	intron (NM_198123, intron 32 of 70)	intron (NM_198123, intron 32 of 70)	-186628	NR_031745	100302225		NR_031745	ENSG00000238399	MIR2053	hsa-mir-2053	microRNA 2053	ncRNA
MEIS1_in_LV-MEIS1_peak_1436	chr12	84166194	84166194	+	18.7831	NA	Intergenic	Intergenic	746635	NM_001146335	55117	Hs.44424	NM_018057	ENSG00000072041	SLC6A15	NTT73|SBAT1|V7-3|hv7-3	solute carrier family 6 member 15	protein-coding
MEIS1_in_LV-MEIS1_peak_2768	chr2	8837736	8837736	+	18.7831	NA	promoter-TSS (NM_020738)	promoter-TSS (NM_020738)	-111	NM_020738	57498	Hs.9873	NM_020738	ENSG00000134313	KIDINS220	ARMS|SINO	kinase D interacting substrate 220	protein-coding
MEIS1_in_LV-MEIS1_peak_949	chr11	42048271	42048271	+	18.7831	NA	intron (NR_135065, intron 6 of 9)	intron (NR_135065, intron 6 of 9)	37187	NR_135065	101928591	Hs.149771	NR_135065		LOC101928591	-	uncharacterized LOC101928591	ncRNA
MEIS1_in_LV-MEIS1_peak_4249	chr5	20024150	20024150	+	18.7831	NA	intron (NM_001291956, intron 2 of 14)	intron (NM_001291956, intron 2 of 14)	-35906	NM_001167667	1016	Hs.317632	NM_004934	ENSG00000145526	CDH18	CDH14|CDH14L|CDH24	cadherin 18	protein-coding
MEIS1_in_LV-MEIS1_peak_551	chr1	212608355	212608355	+	18.7831	NA	promoter-TSS (NM_001674)	promoter-TSS (NM_001674)	-273	NM_001206484	467	Hs.460	NM_001674	ENSG00000162772	ATF3	-	activating transcription factor 3	protein-coding
MEIS1_in_LV-MEIS1_peak_5806	chr9	109082155	109082155	+	18.7831	NA	intron (NM_032012, intron 7 of 17)	intron (NM_032012, intron 7 of 17)	-35857	NR_029506	407036		NR_029506	ENSG00000207698	MIR32	MIRN32|hsa-mir-32|miR-32|miRNA32	microRNA 32	ncRNA
MEIS1_in_LV-MEIS1_peak_171	chr1	82464722	82464722	+	18.7831	NA	Intergenic	Intergenic	520200	NR_110632	101927498		NR_110632	ENSG00000236268	LINC01361	-	long intergenic non-protein coding RNA 1361	ncRNA
MEIS1_in_LV-MEIS1_peak_1633	chr13	44853670	44853670	+	18.7831	NA	Intergenic	Intergenic	-44040	NR_038433	144817	Hs.585616	NR_038433	ENSG00000235097	LINC00330	NCRNA00330	long intergenic non-protein coding RNA 330	ncRNA
MEIS1_in_LV-MEIS1_peak_410	chr1	176773304	176773304	+	18.7537	NA	intron (NM_020318, intron 17 of 22)	intron (NM_020318, intron 17 of 22)	256141	NR_030163	574441		NR_030163	ENSG00000202609	MIR488	MIRN488|hsa-mir-488|mir-488	microRNA 488	ncRNA
MEIS1_in_LV-MEIS1_peak_1833	chr14	36208899	36208899	+	18.7303	NA	Intergenic	Intergenic	-32248	NR_049735	100886964	Hs.742592	NR_049735		PTCSC3	-	papillary thyroid carcinoma susceptibility candidate 3 (non-protein coding)	ncRNA
MEIS1_in_LV-MEIS1_peak_5758	chr9	79571523	79571523	+	18.7303	NA	promoter-TSS (NM_001282748)	promoter-TSS (NM_001282748)	-250	NM_001282753	7091	Hs.444213	NM_007005	ENSG00000106829	TLE4	BCE-1|BCE1|E(spI)|ESG|ESG4|GRG4|Grg-4	transducin like enhancer of split 4	protein-coding
MEIS1_in_LV-MEIS1_peak_2252	chr17	8288434	8288434	+	18.7195	NA	promoter-TSS (NM_001177801)	promoter-TSS (NM_001177801)	-63	NM_001330127	29098	Hs.408233	NM_016492	ENSG00000108961	RANGRF	HSPC165|HSPC236|MOG1|RANGNRF	RAN guanine nucleotide release factor	protein-coding
MEIS1_in_LV-MEIS1_peak_2640	chr19	24087066	24087066	+	18.7195	NA	promoter-TSS (NM_001278665)	promoter-TSS (NM_001278665)	-94	NM_001278664	9534	Hs.434406	NM_004876	ENSG00000213096	ZNF254	BMZF-5|HD-ZNF1|ZNF539|ZNF91L	zinc finger protein 254	protein-coding
MEIS1_in_LV-MEIS1_peak_901	chr11	16924865	16924865	+	18.7195	NA	intron (NM_001329631, intron 3 of 22)	CpG	89551	NM_001329630	144100	Hs.12332	NM_175058	ENSG00000166689	PLEKHA7	-	pleckstrin homology domain containing A7	protein-coding
MEIS1_in_LV-MEIS1_peak_4388	chr5	96934789	96934789	+	18.7195	NA	promoter-TSS (NM_005575)	promoter-TSS (NM_005575)	-853	NM_005575	4012	Hs.527199	NM_005575	ENSG00000113441	LNPEP	CAP|IRAP|P-LAP|PLAP	leucyl and cystinyl aminopeptidase	protein-coding
MEIS1_in_LV-MEIS1_peak_3264	chr21	33417775	33417775	+	18.7195	NA	intron (NM_001329128, intron 3 of 7)	intron (NM_001329128, intron 3 of 7)	14879	NM_001329128	3460	Hs.634632	NM_005534	ENSG00000159128	IFNGR2	AF-1|IFGR2|IFNGT1|IMD28	interferon gamma receptor 2	protein-coding
MEIS1_in_LV-MEIS1_peak_4237	chr5	14589172	14589172	+	18.7195	NA	intron (NM_019018, intron 1 of 7)	L2c|LINE|L2	7390	NM_019018	54491	Hs.155085	NM_019018	ENSG00000145569	OTULINL	FAM105A|NET20	OTU deubiquitinase with linear linkage specificity like	protein-coding
MEIS1_in_LV-MEIS1_peak_4541	chr5	151779867	151779867	+	18.7195	NA	intron (NM_198395, intron 1 of 11)	L1ME3Cz|LINE|L1	-7691	NR_132345	100652758	Hs.587054	NM_001278082		LOC100652758	-	uncharacterized LOC100652758	ncRNA
MEIS1_in_LV-MEIS1_peak_4538	chr5	151354347	151354347	+	18.7195	NA	Intergenic	L1MC1|LINE|L1	-6757	NM_181776	153201	Hs.483877	NM_181776	ENSG00000186335	SLC36A2	PAT2|TRAMD1	solute carrier family 36 member 2	protein-coding
MEIS1_in_LV-MEIS1_peak_4492	chr5	134506335	134506335	+	18.7195	NA	promoter-TSS (NR_105045)	promoter-TSS (NR_105045)	-217	NR_105045	101927934	Hs.535775	NR_105045	ENSG00000251169	LINC01843	-	long intergenic non-protein coding RNA 1843	ncRNA
MEIS1_in_LV-MEIS1_peak_2033	chr15	61227811	61227811	+	18.7195	NA	intron (NM_134261, intron 1 of 10)	CpG	1492	NM_134261	6095	Hs.560343	NM_002943	ENSG00000069667	RORA	NR1F1|ROR1|ROR2|ROR3|RZR-ALPHA|RZRA	RAR related orphan receptor A	protein-coding
MEIS1_in_LV-MEIS1_peak_87	chr1	32394671	32394671	+	18.7195	NA	promoter-TSS (NM_001143888)	promoter-TSS (NM_001143888)	-210	NM_001143889	55108	Hs.353454	NM_018045	ENSG00000160058	BSDC1	-	BSD domain containing 1	protein-coding
MEIS1_in_LV-MEIS1_peak_2522	chr19	2533050	2533050	+	18.7195	NA	intron (NM_052847, intron 3 of 4)	L1ME2z|LINE|L1	56925	NM_015675	4616	Hs.110571	NM_015675	ENSG00000099860	GADD45B	GADD45BETA|MYD118	growth arrest and DNA damage inducible beta	protein-coding
MEIS1_in_LV-MEIS1_peak_5822	chr9	114981269	114981269	+	18.7195	NA	Intergenic	Intergenic	-50674	NM_001244	944	Hs.494901	NM_001244	ENSG00000106952	TNFSF8	CD153|CD30L|CD30LG|TNLG3A	TNF superfamily member 8	protein-coding
MEIS1_in_LV-MEIS1_peak_4633	chr6	26596940	26596940	+	18.7195	NA	promoter-TSS (NM_013375)	promoter-TSS (NM_013375)	-3	NM_013375	29777	Hs.254406	NM_013375	ENSG00000146109	ABT1	Esf2|hABT1	activator of basal transcription 1	protein-coding
MEIS1_in_LV-MEIS1_peak_5927	chrX	94201612	94201612	+	18.7195	NA	Intergenic	Intergenic	527599	NM_173698	286499	Hs.110069	NM_173698	ENSG00000179083	FAM133A	CT115	family with sequence similarity 133 member A	protein-coding
MEIS1_in_LV-MEIS1_peak_4414	chr5	111572772	111572772	+	18.7195	NA	intron (NR_040093, intron 1 of 6)	intron (NR_040093, intron 1 of 6)	-60175	NM_139164	134429	Hs.93842	NM_139164	ENSG00000164211	STARD4	-	StAR related lipid transfer domain containing 4	protein-coding
MEIS1_in_LV-MEIS1_peak_5815	chr9	112338605	112338605	+	18.7195	NA	Intergenic	Intergenic	-4941	NM_005156	9991	Hs.269988	NM_005156	ENSG00000119314	PTBP3	ROD1	polypyrimidine tract binding protein 3	protein-coding
MEIS1_in_LV-MEIS1_peak_4811	chr6	119494058	119494058	+	18.7195	NA	Intergenic	Intergenic	-2756	NR_046100	285762	Hs.571063	NR_046100		LOC285762	-	uncharacterized LOC285762	ncRNA
MEIS1_in_LV-MEIS1_peak_937	chr11	36683108	36683108	+	18.7195	NA	Intergenic	Intergenic	-84829	NM_001243786	5897	Hs.714519	NM_000536	ENSG00000175097	RAG2	RAG-2	recombination activating 2	protein-coding
MEIS1_in_LV-MEIS1_peak_2849	chr2	61854581	61854581	+	18.7195	NA	promoter-TSS (NM_001201543)	promoter-TSS (NM_001201543)	-438	NM_001201543	84140	Hs.440466	NM_032180	ENSG00000170264	FAM161A	RP28	FAM161A, centrosomal protein	protein-coding
MEIS1_in_LV-MEIS1_peak_1139	chr12	1936574	1936574	+	18.7195	NA	promoter-TSS (NR_036546)	promoter-TSS (NR_036546)	2	NR_036546	100271702	Hs.737031	NR_036546	ENSG00000235049	LINC00940	-	long intergenic non-protein coding RNA 940	ncRNA
MEIS1_in_LV-MEIS1_peak_1067	chr11	97224530	97224530	+	18.7195	NA	Intergenic	Intergenic	716105	NR_135097	105369443	Hs.599377	NR_135097	ENSG00000256684	LOC105369443	-	uncharacterized LOC105369443	ncRNA
MEIS1_in_LV-MEIS1_peak_3331	chr22	36529360	36529360	+	18.7195	NA	promoter-TSS (NM_003753)	promoter-TSS (NM_003753)	-130	NM_003753	8664	Hs.55682	NM_003753	ENSG00000100353	EIF3D	EIF3S7|eIF3-p66|eIF3-zeta	eukaryotic translation initiation factor 3 subunit D	protein-coding
MEIS1_in_LV-MEIS1_peak_5478	chr8	50115653	50115653	+	18.7195	NA	intron (NM_001321773, intron 1 of 17)	L2|LINE|L2	-48478	NM_001321778	54212	Hs.584914	NM_018967	ENSG00000147481	SNTG1	G1SYN|SYN4	syntrophin gamma 1	protein-coding
MEIS1_in_LV-MEIS1_peak_495	chr1	201309576	201309576	+	18.7195	NA	intron (NM_001005337, intron 2 of 13)	MamRTE1|LINE|RTE-BovB	26124	NM_001005337	5317	Hs.497350	NM_000299	ENSG00000081277	PKP1	B6P	plakophilin 1	protein-coding
MEIS1_in_LV-MEIS1_peak_5412	chr8	8407774	8407774	+	18.7195	NA	Intergenic	Intergenic	-25940	NM_001080826	157285	Hs.583863	NM_001080826	ENSG00000275342	PRAG1	NACK|PEAK2|PRAGMIN|SGK223	PEAK1 related, kinase-activating pseudokinase 1	protein-coding
MEIS1_in_LV-MEIS1_peak_54	chr1	23479182	23479182	+	18.7195	NA	intron (NM_017707, intron 1 of 24)	intron (NM_017707, intron 1 of 24)	5075	NM_001143778	55616	Hs.437379	NM_017707	ENSG00000088280	ASAP3	ACAP4|CENTB6|DDEFL1|UPLC1	ArfGAP with SH3 domain, ankyrin repeat and PH domain 3	protein-coding
MEIS1_in_LV-MEIS1_peak_2040	chr15	63474621	63474621	+	18.7195	NA	Intergenic	MIRb|SINE|MIR	-29890	NR_046342	9960	Hs.458499	NM_006537	ENSG00000140455	USP3	SIH003|UBP	ubiquitin specific peptidase 3	protein-coding
MEIS1_in_LV-MEIS1_peak_1644	chr13	49858741	49858741	+	18.7195	NA	Intergenic	Intergenic	-31668	NR_003268	220429	Hs.448219	NR_003268	ENSG00000181358	CTAGE10P	-	CTAGE family member 10, pseudogene	pseudo
MEIS1_in_LV-MEIS1_peak_59	chr1	23984622	23984622	+	18.7195	NA	Intergenic	Intergenic	-4159	NM_001191005	10772	Hs.3530	NM_006625	ENSG00000188529	SRSF10	FUSIP1|FUSIP2|NSSR|PPP1R149|SFRS13|SFRS13A|SRp38|SRrp40|TASR|TASR1|TASR2	serine and arginine rich splicing factor 10	protein-coding
MEIS1_in_LV-MEIS1_peak_4542	chr5	154087390	154087390	+	18.7195	NA	Intergenic	Intergenic	48431	NM_005927	4238	Hs.432818	NM_005927	ENSG00000037749	MFAP3	-	microfibril associated protein 3	protein-coding
MEIS1_in_LV-MEIS1_peak_5509	chr8	71059264	71059264	+	18.7195	NA	Intergenic	Intergenic	297247	NM_172059	2138	Hs.444971	NM_000503	ENSG00000104313	EYA1	BOP|BOR|BOS1|OFC1	EYA transcriptional coactivator and phosphatase 1	protein-coding
MEIS1_in_LV-MEIS1_peak_843	chr10	101042863	101042863	+	18.7195	NA	Intergenic	Intergenic	11624	NM_030971	81855	Hs.283844	NM_030971	ENSG00000107819	SFXN3	BA108L7.2|SFX3|SLC56A3	sideroflexin 3	protein-coding
MEIS1_in_LV-MEIS1_peak_3186	chr20	45621871	45621871	+	18.7195	NA	intron (NM_147198, intron 1 of 4)	MER68|LTR|ERVL	-7875	NM_080753	140832	Hs.199380	NM_080753	ENSG00000180305	WFDC10A	C20orf146|WAP10|dJ688G8.3	WAP four-disulfide core domain 10A	protein-coding
MEIS1_in_LV-MEIS1_peak_4913	chr7	2193205	2193205	+	18.7195	NA	intron (NM_001013836, intron 10 of 18)	intron (NM_001013836, intron 10 of 18)	39743	NM_001013837	8379	Hs.654838	NM_003550	ENSG00000002822	MAD1L1	MAD1|PIG9|TP53I9|TXBP181	mitotic arrest deficient 1 like 1	protein-coding
MEIS1_in_LV-MEIS1_peak_3811	chr3	186097810	186097810	+	18.7195	NA	intron (NM_004454, intron 5 of 12)	intron (NM_004454, intron 5 of 12)	11302	NM_004454	2119	Hs.43697	NM_004454	ENSG00000244405	ETV5	ERM	ETS variant 5	protein-coding
MEIS1_in_LV-MEIS1_peak_252	chr1	144567567	144567567	+	18.7195	NA	Intergenic	tRNA-Asn-AAC|tRNA|tRNA	-25301	NM_001144032	730262		NM_001144032	ENSG00000271567	PPIAL4E	COAS2	peptidylprolyl isomerase A like 4E	protein-coding
MEIS1_in_LV-MEIS1_peak_2621	chr19	20776141	20776141	+	18.7195	NA	Intergenic	Intergenic	-114545	NM_145297	199777	Hs.657001	NM_145297	ENSG00000188171	ZNF626	-	zinc finger protein 626	protein-coding
MEIS1_in_LV-MEIS1_peak_3329	chr22	35840536	35840536	+	18.7195	NA	promoter-TSS (NM_014309).2	promoter-TSS (NM_014309).2	47	NM_001031695	23543	Hs.282998	NM_014309	ENSG00000100320	RBFOX2	FOX2|Fox-2|HNRBP2|HRNBP2|RBM9|RTA|dJ106I20.3|fxh	RNA binding fox-1 homolog 2	protein-coding
MEIS1_in_LV-MEIS1_peak_2629	chr19	21767694	21767694	+	18.7195	NA	promoter-TSS (NM_173531)	promoter-TSS (NM_173531)	-66	NM_173531	163227	Hs.365142	NM_173531	ENSG00000197020	ZNF100	-	zinc finger protein 100	protein-coding
MEIS1_in_LV-MEIS1_peak_2874	chr2	70143675	70143675	+	18.7195	NA	Intergenic	Intergenic	-18359	NR_024444	100133985	Hs.135528	NR_024444	ENSG00000231327	LINC01816	-	long intergenic non-protein coding RNA 1816	ncRNA
MEIS1_in_LV-MEIS1_peak_4622	chr6	23388605	23388605	+	18.7195	NA	Intergenic	Intergenic	-670681	NR_134614	105374972	Hs.484889	NR_134613		LOC105374972	-	uncharacterized LOC105374972	ncRNA
MEIS1_in_LV-MEIS1_peak_1292	chr12	52870459	52870459	+	18.7195	NA	Intergenic	Intergenic	-21465	NM_173352	196374	Hs.665267	NM_173352	ENSG00000170423	KRT78	CK-78|K5B|K78|Kb40	keratin 78	protein-coding
MEIS1_in_LV-MEIS1_peak_980	chr11	62323857	62323857	+	18.7195	NA	Intergenic	Intergenic	-13445	NM_001083926	80150	Hs.535326	NM_025080	ENSG00000162174	ASRGL1	ALP|ALP1|CRASH	asparaginase like 1	protein-coding
MEIS1_in_LV-MEIS1_peak_1004	chr11	67302319	67302319	+	18.7195	NA	non-coding (NR_030767, exon 16 of 16)	non-coding (NR_030767, exon 16 of 16)	-1129	NM_017857	54961	Hs.29173	NM_017857	ENSG00000172830	SSH3	SSH3L	slingshot protein phosphatase 3	protein-coding
MEIS1_in_LV-MEIS1_peak_3993	chr4	88631027	88631027	+	18.7163	NA	intron (NM_014606, intron 3 of 25)	intron (NM_014606, intron 3 of 25)	38604	NM_001271602	8916	Hs.35804	NM_014606	ENSG00000138641	HERC3	-	HECT and RLD domain containing E3 ubiquitin protein ligase 3	protein-coding
MEIS1_in_LV-MEIS1_peak_365	chr1	161225906	161225906	+	18.7048	NA	promoter-TSS (NM_032174)	promoter-TSS (NM_032174)	-33	NM_032174	84134	Hs.321653	NM_032174	ENSG00000158882	TOMM40L	TOMM40B	translocase of outer mitochondrial membrane 40 like	protein-coding
MEIS1_in_LV-MEIS1_peak_2091	chr16	1706185	1706185	+	18.7048	NA	promoter-TSS (NM_001040439)	promoter-TSS (NM_001040439)	2	NM_001318852	23162	Hs.207763	NM_015133	ENSG00000138834	MAPK8IP3	JIP-3|JIP3|JSAP1|SYD2|syd	mitogen-activated protein kinase 8 interacting protein 3	protein-coding
MEIS1_in_LV-MEIS1_peak_3592	chr3	105967319	105967319	+	18.6995	NA	Intergenic	Intergenic	-97897	NM_001321790	868	Hs.430589	NM_170662	ENSG00000114423	CBLB	Cbl-b|Nbla00127|RNF56	Cbl proto-oncogene B	protein-coding
MEIS1_in_LV-MEIS1_peak_250	chr1	144419259	144419259	+	18.6507	NA	Intergenic	Intergenic	6683	NR_104076	101954267		NR_104076	ENSG00000207205	RNVU1-15	RNU1-121|RNU1-66|RNVU1-16|vU1.15|vU1.16	RNA, variant U1 small nuclear 15	snRNA
MEIS1_in_LV-MEIS1_peak_457	chr1	186997993	186997993	+	18.6498	NA	Intergenic	Intergenic	-94849	NR_126347	104169671		NR_126347	ENSG00000230426	LINC01036	-	long intergenic non-protein coding RNA 1036	ncRNA
MEIS1_in_LV-MEIS1_peak_1689	chr13	70284616	70284616	+	18.6335	NA	Intergenic	Intergenic	-176123	NM_001286725	57626	Hs.508201	NM_020866	ENSG00000150361	KLHL1	MRP2	kelch like family member 1	protein-coding
MEIS1_in_LV-MEIS1_peak_754	chr10	60141061	60141061	+	18.6335	NA	promoter-TSS (NM_001149)	promoter-TSS (NM_001149)	-45	NM_001149	288	Hs.499725	NM_001149	ENSG00000151150	ANK3	ANKYRIN-G|MRT37	ankyrin 3	protein-coding
MEIS1_in_LV-MEIS1_peak_4074	chr4	115671859	115671859	+	18.6263	NA	Intergenic	Intergenic	-557983	NM_022569	64579	Hs.591700	NM_022569	ENSG00000138653	NDST4	N-HSST|N-HSST 4|NDST-4|NHSST4	N-deacetylase and N-sulfotransferase 4	protein-coding
MEIS1_in_LV-MEIS1_peak_3760	chr3	172204088	172204088	+	18.5878	NA	intron (NM_001135095, intron 3 of 25)	intron (NM_001135095, intron 3 of 25)	163534	NM_001135095	64778	Hs.744888	NM_022763	ENSG00000075420	FNDC3B	FAD104|PRO4979|YVTM2421	fibronectin type III domain containing 3B	protein-coding
MEIS1_in_LV-MEIS1_peak_4764	chr6	93727702	93727702	+	18.5755	NA	intron (NR_015362, intron 3 of 9)	intron (NR_015362, intron 3 of 9)	20619	NR_015362	643432	Hs.509936	NR_015362		TSG1	-	tumor suppressor TSG1	ncRNA
MEIS1_in_LV-MEIS1_peak_810	chr10	78303271	78303271	+	18.5527	NA	Intergenic	CpG	35943	NR_073447	414243	Hs.55047	NR_073447	ENSG00000230417	LINC00595	C10orf101	long intergenic non-protein coding RNA 595	ncRNA
MEIS1_in_LV-MEIS1_peak_4077	chr4	118988194	118988194	+	18.5527	NA	intron (NM_133477, intron 1 of 4)	intron (NM_133477, intron 1 of 4)	99353	NM_001128933	171024	Hs.655519	NM_133477	ENSG00000172403	SYNPO2	-	synaptopodin 2	protein-coding
MEIS1_in_LV-MEIS1_peak_4381	chr5	95646620	95646620	+	18.5527	NA	promoter-TSS (NM_001131066)	promoter-TSS (NM_001131066)	-157	NM_001131066	317671	Hs.399758	NM_173362	ENSG00000175449	RFESD	-	Rieske Fe-S domain containing	protein-coding
MEIS1_in_LV-MEIS1_peak_1185	chr12	14842486	14842486	+	18.5527	NA	intron (NM_021071, intron 1 of 2)	(AAGCC)n|Simple_repeat|Simple_repeat	993	NM_021071	420	Hs.591158	NM_021071	ENSG00000111339	ART4	ARTC4|CD297|DO|DOK1	ADP-ribosyltransferase 4 (Dombrock blood group)	protein-coding
MEIS1_in_LV-MEIS1_peak_804	chr10	77240300	77240300	+	18.5527	NA	intron (NM_001322838, intron 3 of 29)	intron (NM_001322838, intron 3 of 29)	99469	NR_120654	101929310	Hs.666457	NR_120654	ENSG00000225497	KCNMA1-AS2	-	KCNMA1 antisense RNA 2	ncRNA
MEIS1_in_LV-MEIS1_peak_1563	chr12	120437977	120437977	+	18.5521	NA	promoter-TSS (NM_004373)	promoter-TSS (NM_004373)	-113	NM_004373	1337	Hs.369624	NM_004373	ENSG00000111775	COX6A1	CMTRID|COX6A|COX6AL	cytochrome c oxidase subunit 6A1	protein-coding
MEIS1_in_LV-MEIS1_peak_3743	chr3	168957632	168957632	+	18.5178	NA	Intergenic	Intergenic	55687	NR_109989	100507661	Hs.65918	NR_109989	ENSG00000242268	LINC02082	-	long intergenic non-protein coding RNA 2082	ncRNA
MEIS1_in_LV-MEIS1_peak_402	chr1	173868258	173868258	+	18.5178	NA	promoter-TSS (NR_002578)	promoter-TSS (NR_002578)	-39	NM_032522	84614	Hs.668497	NM_032522	ENSG00000185278	ZBTB37	D430004I08Rik|ZNF908	zinc finger and BTB domain containing 37	protein-coding
MEIS1_in_LV-MEIS1_peak_1552	chr12	118567649	118567649	+	18.5178	NA	Intergenic	L1ME3|LINE|L1	191096	NM_022491	64426	Hs.416630	NM_022491	ENSG00000111707	SUDS3	SAP45|SDS3	SDS3 homolog, SIN3A corepressor complex component	protein-coding
MEIS1_in_LV-MEIS1_peak_2459	chr18	42576276	42576276	+	18.5178	NA	intron (NR_046174, intron 7 of 9)	L1M5|LINE|L1	389608	NR_046454	284260	Hs.652819	NR_046174	ENSG00000267586	LINC00907	-	long intergenic non-protein coding RNA 907	ncRNA
MEIS1_in_LV-MEIS1_peak_2172	chr16	54927356	54927356	+	18.5025	NA	intron (NR_110453, intron 1 of 5)	intron (NR_110453, intron 1 of 5)	1422	NR_110454	643911	Hs.237396	NM_001308963		CRNDE	CRNDEP|LINC00180|NCRNA00180|PNAS-108|lincIRX5	colorectal neoplasia differentially expressed	protein-coding
MEIS1_in_LV-MEIS1_peak_3769	chr3	174340100	174340100	+	18.5002	NA	Intergenic	MamRep1879|DNA|hAT-Tip100?	-419304	NR_046664	100874010	Hs.624265	NR_046664	ENSG00000228213	NLGN1-AS1	-	NLGN1 antisense RNA 1	ncRNA
MEIS1_in_LV-MEIS1_peak_812	chr10	78973677	78973677	+	18.4911	NA	intron (NR_015429, intron 3 of 7)	CpG	93771	NR_015429	283050	Hs.309176	NR_015429	ENSG00000224596	ZMIZ1-AS1	-	ZMIZ1 antisense RNA 1	ncRNA
MEIS1_in_LV-MEIS1_peak_3018	chr2	189226208	189226208	+	18.4911	NA	Intergenic	Intergenic	-46329	NM_000393	1290	Hs.445827	NM_000393	ENSG00000204262	COL5A2	EDSC|EDSCL2	collagen type V alpha 2 chain	protein-coding
MEIS1_in_LV-MEIS1_peak_300	chr1	150515608	150515608	+	18.4911	NA	promoter-TSS (NR_051960)	promoter-TSS (NR_051960)	-149	NR_051960	100874054	Hs.576460	NR_051960	ENSG00000228126	FALEC	FAL1|LINC00568|ncRNA-a1	focally amplified long non-coding RNA in epithelial cancer	ncRNA
MEIS1_in_LV-MEIS1_peak_770	chr10	67259372	67259372	+	18.4705	NA	intron (NM_001127384, intron 5 of 17)	intron (NM_001127384, intron 5 of 17)	144038	NR_106973	102466814		NR_106973	ENSG00000276866	MIR7151	hsa-mir-7151	microRNA 7151	ncRNA
MEIS1_in_LV-MEIS1_peak_3971	chr4	82491807	82491807	+	18.4705	NA	intron (NM_001080506, intron 6 of 7)	intron (NM_001080506, intron 6 of 7)	61327	NR_120457	58478	Hs.18442	NM_021204	ENSG00000145293	ENOPH1	E1|MASA|MST145|mtnC	enolase-phosphatase 1	protein-coding
MEIS1_in_LV-MEIS1_peak_1558	chr12	120291710	120291710	+	18.4705	NA	TTS (NR_003137)	TTS (NR_003137)	193	NR_003137	26834		NR_003137	ENSG00000202538	RNU4-2	RNU4-1B|RNU4B1|RNU4C|U4A|U4b|U4c	RNA, U4 small nuclear 2	snRNA
MEIS1_in_LV-MEIS1_peak_4317	chr5	59830156	59830156	+	18.4705	NA	intron (NM_001165899, intron 3 of 16)	intron (NM_001165899, intron 3 of 16)	-61544	NM_001197218	5144	Hs.117545	NM_006203	ENSG00000113448	PDE4D	ACRDYS2|DPDE3|HSPDE4D|PDE43|PDE4DN2|STRK1	phosphodiesterase 4D	protein-coding
MEIS1_in_LV-MEIS1_peak_2756	chr2	1221953	1221953	+	18.4705	NA	intron (NM_018968, intron 9 of 16)	(CTGTCT)n|Simple_repeat|Simple_repeat	-191508	NM_000547	7173	Hs.467554	NM_000547	ENSG00000115705	TPO	MSA|TDH2A|TPX	thyroid peroxidase	protein-coding
MEIS1_in_LV-MEIS1_peak_4402	chr5	103708822	103708822	+	18.3813	NA	Intergenic	Intergenic	-146021	NM_001300741	83594	Hs.434289	NM_031438	ENSG00000112874	NUDT12	-	nudix hydrolase 12	protein-coding
MEIS1_in_LV-MEIS1_peak_4093	chr4	124078029	124078029	+	18.3813	NA	Intergenic	L1PA8A|LINE|L1	303765	NR_027106	285419	Hs.535763	NR_027105	ENSG00000249464	LINC01091	-	long intergenic non-protein coding RNA 1091	ncRNA
MEIS1_in_LV-MEIS1_peak_1369	chr12	64590397	64590397	+	18.3813	NA	Intergenic	Intergenic	-20116	NR_040718	283349	Hs.643605	NM_178169	ENSG00000153179	RASSF3	RASSF5	Ras association domain family member 3	protein-coding
MEIS1_in_LV-MEIS1_peak_185	chr1	93552822	93552822	+	18.3813	NA	3' UTR (NM_001024948, exon 14 of 14)	3' UTR (NM_001024948, exon 14 of 14)	32340	NM_001308251	8412	Hs.36958	NM_003567	ENSG00000137936	BCAR3	AND-34|NSP2|SH2D3B	BCAR3, NSP family adaptor protein	protein-coding
MEIS1_in_LV-MEIS1_peak_4473	chr5	127834424	127834424	+	18.3813	NA	intron (NM_001317938, intron 5 of 6)	MER34A1|LTR|ERV1	131035	NM_001317938	728586	Hs.582532	NM_001317938	ENSG00000230561	CCDC192	LINC01183	coiled-coil domain containing 192	protein-coding
MEIS1_in_LV-MEIS1_peak_4956	chr7	13989788	13989788	+	18.3813	NA	5' UTR (NM_001163147, exon 1 of 12)	5' UTR (NM_001163147, exon 1 of 12)	229	NM_004956	2115	Hs.22634	NM_004956	ENSG00000006468	ETV1	ER81	ETS variant 1	protein-coding
MEIS1_in_LV-MEIS1_peak_5799	chr9	103858587	103858587	+	18.3813	NA	Intergenic	Intergenic	-141122	NR_109803	101928523		NR_109803	ENSG00000285483	LOC101928523	-	uncharacterized LOC101928523	ncRNA
MEIS1_in_LV-MEIS1_peak_4878	chr6	150069148	150069148	+	18.3813	NA	promoter-TSS (NM_024518)	promoter-TSS (NM_024518)	-1	NM_024518	79465	Hs.15422	NM_024518	ENSG00000131019	ULBP3	N2DL-3|NKG2DL3|RAET1N	UL16 binding protein 3	protein-coding
MEIS1_in_LV-MEIS1_peak_2190	chr16	69548027	69548027	+	18.3813	NA	Intergenic	L1M5|LINE|L1	17841	NR_031719	100302119		NR_031719	ENSG00000223109	MIR1538	MIRN1538|hsa-mir-1538	microRNA 1538	ncRNA
MEIS1_in_LV-MEIS1_peak_2480	chr18	59053634	59053634	+	18.3813	NA	TTS (NR_024021)	TTS (NR_024021)	17955	NR_024021	390858	Hs.716280	NR_024021		OACYLP	ACYL3P	O-acyltransferase like, pseudogene	pseudo
MEIS1_in_LV-MEIS1_peak_2950	chr2	130500492	130500492	+	18.3813	NA	intron (NM_001277406, intron 4 of 14)	intron (NM_001277406, intron 4 of 14)	8743	NM_001277406	653269	Hs.558782	NM_001277406	ENSG00000196834	POTEI	POTE2beta	POTE ankyrin domain family member I	protein-coding
MEIS1_in_LV-MEIS1_peak_1556	chr12	120087286	120087286	+	18.3813	NA	intron (NM_207311, intron 7 of 8)	CpG	29553	NM_006861	11021	Hs.524788	NM_006861	ENSG00000111737	RAB35	H-ray|RAB1C|RAY	RAB35, member RAS oncogene family	protein-coding
MEIS1_in_LV-MEIS1_peak_5188	chr7	91941621	91941621	+	18.3593	NA	intron (NM_005751, intron 1 of 49)	intron (NM_005751, intron 1 of 49)	746	NM_005751	10142	Hs.651221	NM_005751	ENSG00000127914	AKAP9	AKAP-9|AKAP350|AKAP450|CG-NAP|HYPERION|LQT11|MU-RMS-40.16A|PPP1R45|PRKA9|YOTIAO	A-kinase anchoring protein 9	protein-coding
MEIS1_in_LV-MEIS1_peak_1857	chr14	43465151	43465151	+	18.348	NA	Intergenic	Intergenic	1042145	NM_032135	84075	Hs.307086	NM_032135	ENSG00000189139	FSCB	C14orf155	fibrous sheath CABYR binding protein	protein-coding
MEIS1_in_LV-MEIS1_peak_4730	chr6	74598931	74598931	+	18.3111	NA	intron (NR_110856, intron 2 of 3)	MER63A|DNA|hAT-Blackjack	529480	NR_110856	101928516	Hs.384600	NR_110856	ENSG00000223786	LOC101928516	-	uncharacterized LOC101928516	ncRNA
MEIS1_in_LV-MEIS1_peak_5886	chrUn_GL000219v1	99625	99625	+	18.298	NA	promoter-TSS (NR_027436)	promoter-TSS (NR_027436)	17	NR_027436	283788	Hs.657131	NR_027436		LOC283788	-	FSHD region gene 1 pseudogene	pseudo
MEIS1_in_LV-MEIS1_peak_2557	chr19	10509783	10509783	+	18.2914	NA	Intergenic	L1ME4b|LINE|L1	-6405	NM_203500	9817	Hs.465870	NM_012289	ENSG00000079999	KEAP1	INrf2|KLHL19	kelch like ECH associated protein 1	protein-coding
MEIS1_in_LV-MEIS1_peak_1659	chr13	51035020	51035020	+	18.2914	NA	intron (NR_003923, intron 3 of 16)	intron (NR_003923, intron 3 of 16)	31137	NR_003923	2974	Hs.411573	NM_004129	ENSG00000123201	GUCY1B2	GC-SB2	guanylate cyclase 1 soluble subunit beta 2 (pseudogene)	pseudo
MEIS1_in_LV-MEIS1_peak_1742	chr13	93202275	93202275	+	18.2914	NA	Intergenic	LTR37-int|LTR|ERV1	-24533	NM_005708	10082	Hs.444329	NM_005708	ENSG00000183098	GPC6	OMIMD1	glypican 6	protein-coding
MEIS1_in_LV-MEIS1_peak_681	chr10	5610896	5610896	+	18.2914	NA	Intergenic	Intergenic	-14778	NR_134491	105376382	Hs.460282	NR_134491	ENSG00000242147	LOC105376382	-	uncharacterized LOC105376382	ncRNA
MEIS1_in_LV-MEIS1_peak_3058	chr2	203722515	203722515	+	18.2914	NA	intron (NM_001243078, intron 1 of 2)	intron (NM_001243078, intron 1 of 2)	16040	NM_006139	940	Hs.443123	NM_006139	ENSG00000178562	CD28	Tp44	CD28 molecule	protein-coding
MEIS1_in_LV-MEIS1_peak_3956	chr4	76526757	76526757	+	18.2914	NA	intron (NM_020859, intron 1 of 10)	intron (NM_020859, intron 1 of 10)	-46811	NR_039654	100616299		NR_039654	ENSG00000263445	MIR4450	mir-4450	microRNA 4450	ncRNA
MEIS1_in_LV-MEIS1_peak_5081	chr7	56093010	56093010	+	18.2914	NA	promoter-TSS (NM_001258459)	promoter-TSS (NM_001258459)	-14	NM_006213	5260	Hs.730821	NM_006213	ENSG00000164776	PHKG1	PHKG	phosphorylase kinase catalytic subunit gamma 1	protein-coding
MEIS1_in_LV-MEIS1_peak_5634	chr8	140790862	140790862	+	18.2914	NA	intron (NM_153831, intron 13 of 31)	intron (NM_153831, intron 13 of 31)	-58209	NR_029892	442893		NR_029892	ENSG00000254324	MIR151A	MIR151|MIRN151|hsa-mir-151|hsa-mir-151a	microRNA 151a	ncRNA
MEIS1_in_LV-MEIS1_peak_2211	chr16	80989854	80989854	+	18.2914	NA	intron (NM_020188, intron 2 of 3)	L1MC4|LINE|L1	-16644	NM_001100624	55839	Hs.726537	NM_018455	ENSG00000166451	CENPN	BM039|C16orf60|CENP-N|ICEN32	centromere protein N	protein-coding
MEIS1_in_LV-MEIS1_peak_5214	chr7	97872394	97872394	+	18.2914	NA	promoter-TSS (NM_133436)	promoter-TSS (NM_133436)	148	NM_001178075	440	Hs.489207	NM_001673	ENSG00000070669	ASNS	ASNSD|TS11	asparagine synthetase (glutamine-hydrolyzing)	protein-coding
MEIS1_in_LV-MEIS1_peak_3774	chr3	174955784	174955784	+	18.2513	NA	intron (NM_207015, intron 1 of 13)	MER5A|DNA|hAT-Charlie	96463	NM_207015	254827	Hs.565848	NM_207015	ENSG00000177694	NAALADL2	-	N-acetylated alpha-linked acidic dipeptidase like 2	protein-coding
MEIS1_in_LV-MEIS1_peak_291	chr1	149686970	149686970	+	18.2513	NA	Intergenic	MER66C|LTR|ERV1	-14134	NR_111933	388692	Hs.271249	NM_001013644		LOC388692	-	uncharacterized LOC388692	protein-coding
MEIS1_in_LV-MEIS1_peak_242	chr1	120995200	120995200	+	18.2485	NA	intron (NR_135813, intron 2 of 2)	MER66C|LTR|ERV1	52600	NR_104073	101954264		NR_104073	ENSG00000277610	RNVU1-4	RNU1-102|RNU1-50|RNVU1-5|vU1.4|vU1.5	RNA, variant U1 small nuclear 4	snRNA
MEIS1_in_LV-MEIS1_peak_341	chr1	155273609	155273609	+	18.247	NA	promoter-TSS (NM_001294338)	promoter-TSS (NM_001294338)	-80	NM_001294338	1196	Hs.73986	NM_001291	ENSG00000176444	CLK2	-	CDC like kinase 2	protein-coding
MEIS1_in_LV-MEIS1_peak_2839	chr2	55810819	55810819	+	18.247	NA	Intergenic	Intergenic	113344	NM_001039349	2202	Hs.76224	NM_004105	ENSG00000115380	EFEMP1	DHRD|DRAD|FBLN3|FBNL|FIBL-3|MLVT|MTLV|S1-5	EGF containing fibulin extracellular matrix protein 1	protein-coding
MEIS1_in_LV-MEIS1_peak_1724	chr13	85653864	85653864	+	18.235	NA	Intergenic	L2a|LINE|L2	145484	NM_032229	84189	Hs.525105	NM_032229	ENSG00000184564	SLITRK6	DFNMYP	SLIT and NTRK like family member 6	protein-coding
MEIS1_in_LV-MEIS1_peak_4259	chr5	24547313	24547313	+	18.2169	NA	intron (NM_001317224, intron 1 of 10)	L1MEg|LINE|L1	46186	NM_001317224	1008	Hs.92489	NM_006727	ENSG00000040731	CDH10	-	cadherin 10	protein-coding
MEIS1_in_LV-MEIS1_peak_287	chr1	149285860	149285860	+	18.1697	NA	Intergenic	CpG	-203549	NM_001037675	400818	Hs.445080	NM_001037675	ENSG00000269713	NBPF9	AE01	NBPF member 9	protein-coding
MEIS1_in_LV-MEIS1_peak_487	chr1	197663388	197663388	+	18.1643	NA	intron (NM_144977, intron 5 of 15)	intron (NM_144977, intron 5 of 15)	112105	NM_001300858	163486	Hs.125056	NM_019049	ENSG00000213047	DENND1B	C1ORF18|C1orf218|FAM31B	DENN domain containing 1B	protein-coding
MEIS1_in_LV-MEIS1_peak_2787	chr2	20446951	20446951	+	18.1439	NA	promoter-TSS (NM_004040)	promoter-TSS (NM_004040)	-120	NM_004040	388	Hs.502876	NM_004040	ENSG00000143878	RHOB	ARH6|ARHB|MST081|MSTP081|RHOH6	ras homolog family member B	protein-coding
MEIS1_in_LV-MEIS1_peak_595	chr1	225777679	225777679	+	18.1205	NA	promoter-TSS (NM_001130440)	promoter-TSS (NM_001130440)	-134	NM_003133	6726	Hs.511425	NM_003133	ENSG00000143742	SRP9	ALURBP	signal recognition particle 9	protein-coding
MEIS1_in_LV-MEIS1_peak_1134	chr12	1220344	1220344	+	18.1039	NA	intron (NR_027946, intron 12 of 18)	L2a|LINE|L2	192596	NM_001301248	23085	Hs.601216	NM_178039	ENSG00000082805	ERC1	Cast2|ELKS|ERC-1|RAB6IP2	ELKS/RAB6-interacting/CAST family member 1	protein-coding
MEIS1_in_LV-MEIS1_peak_248	chr1	143778318	143778318	+	18.0567	NA	Intergenic	MER66C|LTR|ERV1	-14177	NR_111933	388692	Hs.271249	NM_001013644		LOC388692	-	uncharacterized LOC388692	protein-coding
MEIS1_in_LV-MEIS1_peak_778	chr10	72816801	72816801	+	17.995	NA	intron (NR_073062, intron 3 of 9)	intron (NR_073062, intron 3 of 9)	-76755	NM_152635	170392	Hs.8366	NM_152635	ENSG00000138315	OIT3	LZP	oncoprotein induced transcript 3	protein-coding
MEIS1_in_LV-MEIS1_peak_355	chr1	156767268	156767268	+	17.9718	NA	promoter-TSS (NM_005973)	promoter-TSS (NM_005973)	-214	NM_005973	5546	Hs.516948	NM_005973	ENSG00000143294	PRCC	RCCP1|TPRC	papillary renal cell carcinoma (translocation-associated)	protein-coding
MEIS1_in_LV-MEIS1_peak_4563	chr5	165786244	165786244	+	17.9718	NA	Intergenic	L2a|LINE|L2	1140126	NR_108020	102557615		NR_108020	ENSG00000254130	LINC01947	CTB-7E3.1	long intergenic non-protein coding RNA 1947	ncRNA
MEIS1_in_LV-MEIS1_peak_3977	chr4	87298665	87298665	+	17.9718	NA	Intergenic	Intergenic	1918	NR_049891	100847027		NR_049891	ENSG00000263981	MIR5705	-	microRNA 5705	ncRNA
MEIS1_in_LV-MEIS1_peak_4111	chr4	132653230	132653230	+	17.9718	NA	intron (NR_126401, intron 2 of 3)	L1MA4A|LINE|L1	62141	NR_126401	104355285	Hs.123483	NR_126401	ENSG00000251398	LINC01256	TCONS_l2_00021715	long intergenic non-protein coding RNA 1256	ncRNA
MEIS1_in_LV-MEIS1_peak_4204	chr4	175873901	175873901	+	17.9602	NA	intron (NR_048571, intron 1 of 5)	intron (NR_048571, intron 1 of 5)	-60787	NM_201591	2823	Hs.75819	NM_005277	ENSG00000150625	GPM6A	GPM6|M6A	glycoprotein M6A	protein-coding
MEIS1_in_LV-MEIS1_peak_4262	chr5	28678743	28678743	+	17.9593	NA	Intergenic	Intergenic	-248127	NR_033961	729862	Hs.646006	NR_033961		LSP1P3	-	lymphocyte-specific protein 1 pseudogene 3	pseudo
MEIS1_in_LV-MEIS1_peak_1243	chr12	45216050	45216050	+	17.9418	NA	promoter-TSS (NM_001025356)	promoter-TSS (NM_001025356)	-44	NR_037144	51054	Hs.233495	NM_015899	ENSG00000134297	PLEKHA8P1	PLEKHA9	pleckstrin homology domain containing A8 pseudogene 1	pseudo
MEIS1_in_LV-MEIS1_peak_5195	chr7	92528631	92528631	+	17.9166	NA	promoter-TSS (NM_000466)	promoter-TSS (NM_000466)	-100	NM_000466	5189	Hs.164682	NM_000466	ENSG00000127980	PEX1	HMLR1|PBD1A|PBD1B|ZWS|ZWS1	peroxisomal biogenesis factor 1	protein-coding
MEIS1_in_LV-MEIS1_peak_4250	chr5	20040062	20040062	+	17.9149	NA	intron (NM_001291956, intron 2 of 14)	L1P3|LINE|L1	-51818	NM_001167667	1016	Hs.317632	NM_004934	ENSG00000145526	CDH18	CDH14|CDH14L|CDH24	cadherin 18	protein-coding
MEIS1_in_LV-MEIS1_peak_1192	chr12	16450083	16450083	+	17.9149	NA	Intergenic	Intergenic	96666	NM_145764	4257	Hs.389700	NM_020300	ENSG00000008394	MGST1	GST12|MGST|MGST-I	microsomal glutathione S-transferase 1	protein-coding
MEIS1_in_LV-MEIS1_peak_2955	chr2	138177940	138177940	+	17.9149	NA	Intergenic	Intergenic	76056	NR_135526	105373635		NR_135526	ENSG00000224231	LINC01832	-	long intergenic non-protein coding RNA 1832	ncRNA
MEIS1_in_LV-MEIS1_peak_941	chr11	39576637	39576637	+	17.9149	NA	Intergenic	Intergenic	716493	NR_047673	57689	Hs.745123	NM_020929	ENSG00000148948	LRRC4C	NGL-1|NGL1	leucine rich repeat containing 4C	protein-coding
MEIS1_in_LV-MEIS1_peak_1131	chr12	949818	949818	+	17.9149	NA	promoter-TSS (NM_001297421)	promoter-TSS (NM_001297421)	-96	NM_001297422	5893	Hs.410355	NM_134422	ENSG00000002016	RAD52	-	RAD52 homolog, DNA repair protein	protein-coding
MEIS1_in_LV-MEIS1_peak_3809	chr3	185363001	185363001	+	17.9149	NA	promoter-TSS (NM_004721)	promoter-TSS (NM_004721)	-47	NM_004721	9175	Hs.591306	NM_004721	ENSG00000073803	MAP3K13	LZK|MEKK13|MLK	mitogen-activated protein kinase kinase kinase 13	protein-coding
MEIS1_in_LV-MEIS1_peak_5378	chr7	143726315	143726315	+	17.9149	NA	intron (NM_001130026, intron 7 of 7)	intron (NM_001130026, intron 7 of 7)	10469	NM_001130026	285966	Hs.743565	NM_173678	ENSG00000170379	TCAF2	FAM115C|FAM139A|GATD9	TRPM8 channel associated factor 2	protein-coding
MEIS1_in_LV-MEIS1_peak_50	chr1	21607971	21607971	+	17.9149	NA	intron (NM_001145658, intron 17 of 24)	intron (NM_001145658, intron 17 of 24)	43884	NM_001145658	5909	Hs.148178	NM_002885	ENSG00000076864	RAP1GAP	RAP1GA1|RAP1GAP1|RAP1GAPII|RAPGAP	RAP1 GTPase activating protein	protein-coding
MEIS1_in_LV-MEIS1_peak_2650	chr19	38305155	38305155	+	17.9149	NA	TTS (NM_001317801)	TTS (NM_001317801)	994	NM_033520	64073	Hs.631544	NM_022125	ENSG00000167644	C19orf33	H2RSP|IMUP|IMUP-1|IMUP-2	chromosome 19 open reading frame 33	protein-coding
MEIS1_in_LV-MEIS1_peak_1317	chr12	54934474	54934474	+	17.9149	NA	Intergenic	MER41B|LTR|ERV1	39258	NM_014796	9840	Hs.33187	NM_014796	ENSG00000135426	TESPA1	HSPC257|KIAA0748	thymocyte expressed, positive selection associated 1	protein-coding
MEIS1_in_LV-MEIS1_peak_4965	chr7	16446513	16446513	+	17.9149	NA	Intergenic	Intergenic	19336	NM_015464	25928	Hs.648106	NM_015464	ENSG00000171243	SOSTDC1	CDA019|DAND7|ECTODIN|USAG1	sclerostin domain containing 1	protein-coding
MEIS1_in_LV-MEIS1_peak_4368	chr5	91380140	91380140	+	17.9149	NA	promoter-TSS (NR_027435)	promoter-TSS (NR_027435)	157	NM_001329670	57561	Hs.24684	NM_020801	ENSG00000113369	ARRDC3	TLIMP	arrestin domain containing 3	protein-coding
MEIS1_in_LV-MEIS1_peak_1289	chr12	52116388	52116388	+	17.9114	NA	Intergenic	HERVE-int|LTR|ERV1	22819	NR_120440	26628	Hs.524431	NR_120437	ENSG00000257542	OR7E47P	OR7E141	olfactory receptor family 7 subfamily E member 47 pseudogene	pseudo
MEIS1_in_LV-MEIS1_peak_202	chr1	102613656	102613656	+	17.9114	NA	Intergenic	Intergenic	494840	NM_080630	1301	Hs.523446	NM_001854	ENSG00000060718	COL11A1	CO11A1|COLL6|STL2	collagen type XI alpha 1 chain	protein-coding
MEIS1_in_LV-MEIS1_peak_324	chr1	153963942	153963942	+	17.9114	NA	promoter-TSS (NM_001271958)	promoter-TSS (NM_001271958)	-301	NM_001271958	27173	Hs.7854	NM_014437	ENSG00000143570	SLC39A1	ZIP1|ZIRTL	solute carrier family 39 member 1	protein-coding
MEIS1_in_LV-MEIS1_peak_3537	chr3	89180463	89180463	+	17.8898	NA	intron (NM_005233, intron 2 of 16)	intron (NM_005233, intron 2 of 16)	72939	NM_005233	2042	Hs.123642	NM_005233	ENSG00000044524	EPHA3	EK4|ETK|ETK1|HEK|HEK4|TYRO4	EPH receptor A3	protein-coding
MEIS1_in_LV-MEIS1_peak_3472	chr3	53892036	53892036	+	17.8796	NA	promoter-TSS (NM_021237)	promoter-TSS (NM_021237)	-21	NM_021237	58515	Hs.58471	NM_021237	ENSG00000113811	SELENOK	HSPC030|HSPC297|SELK	selenoprotein K	protein-coding
MEIS1_in_LV-MEIS1_peak_359	chr1	160031954	160031954	+	17.8584	NA	promoter-TSS (NM_145167)	promoter-TSS (NM_145167)	39	NM_145167	93183	Hs.552810	NM_145167	ENSG00000143315	PIGM	GPI-MT-I	phosphatidylinositol glycan anchor biosynthesis class M	protein-coding
MEIS1_in_LV-MEIS1_peak_554	chr1	214439567	214439567	+	17.8584	NA	intron (NM_005401, intron 3 of 18)	intron (NM_005401, intron 3 of 18)	112114	NM_005401	5784	Hs.193557	NM_005401	ENSG00000152104	PTPN14	CATLPH|PEZ|PTP36	protein tyrosine phosphatase, non-receptor type 14	protein-coding
MEIS1_in_LV-MEIS1_peak_5877	chr9	137269731	137269731	+	17.7967	NA	intron (NM_015456, intron 10 of 12)	Tigger3a|DNA|TcMar-Tigger	-8097	NM_017723	54863	Hs.495541	NM_017723	ENSG00000198113	TOR4A	C9orf167	torsin family 4 member A	protein-coding
MEIS1_in_LV-MEIS1_peak_2183	chr16	67893127	67893127	+	17.7837	NA	promoter-TSS (NM_006742)	promoter-TSS (NM_006742)	-145	NM_006742	5681	Hs.513683	NM_006742	ENSG00000159792	PSKH1	-	protein serine kinase H1	protein-coding
MEIS1_in_LV-MEIS1_peak_5389	chr7	149873891	149873891	+	17.7837	NA	promoter-TSS (NR_027040)	promoter-TSS (NR_027040)	-29	NR_027040	401431	Hs.556998	NM_001008745	ENSG00000204934	ATP6V0E2-AS1	-	ATP6V0E2 antisense RNA 1	ncRNA
MEIS1_in_LV-MEIS1_peak_3772	chr3	174862335	174862335	+	17.7237	NA	intron (NM_207015, intron 1 of 13)	intron (NM_207015, intron 1 of 13)	3014	NM_207015	254827	Hs.565848	NM_207015	ENSG00000177694	NAALADL2	-	N-acetylated alpha-linked acidic dipeptidase like 2	protein-coding
MEIS1_in_LV-MEIS1_peak_1487	chr12	100573562	100573562	+	17.7162	NA	promoter-TSS (NM_174942)	promoter-TSS (NM_174942)	-99	NM_174942	283431	Hs.20575	NM_174942	ENSG00000139354	GAS2L3	G2L3	growth arrest specific 2 like 3	protein-coding
MEIS1_in_LV-MEIS1_peak_5341	chr7	125033208	125033208	+	17.7162	NA	intron (NR_125718, intron 4 of 10)	intron (NR_125718, intron 4 of 10)	-103225	NM_015450	25913	Hs.31968	NM_015450	ENSG00000128513	POT1	CMM10|GLM9|HPOT1	protection of telomeres 1	protein-coding
MEIS1_in_LV-MEIS1_peak_4079	chr4	119212621	119212621	+	17.7162	NA	promoter-TSS (NM_019050)	promoter-TSS (NM_019050)	-6	NM_019050	54532	Hs.431081	NM_019050	ENSG00000145390	USP53	-	ubiquitin specific peptidase 53	protein-coding
MEIS1_in_LV-MEIS1_peak_5331	chr7	122893921	122893921	+	17.7162	NA	Intergenic	Intergenic	-7162	NM_017954	93664	Hs.649459	NM_017954	ENSG00000081803	CADPS2	CAPS2	calcium dependent secretion activator 2	protein-coding
MEIS1_in_LV-MEIS1_peak_4202	chr4	175713662	175713662	+	17.7162	NA	intron (NM_201592, intron 1 of 6)	intron (NM_201592, intron 1 of 6)	74014	NM_001261448	2823	Hs.75819	NM_005277	ENSG00000150625	GPM6A	GPM6|M6A	glycoprotein M6A	protein-coding
MEIS1_in_LV-MEIS1_peak_2437	chr18	27847629	27847629	+	17.7132	NA	Intergenic	Intergenic	188956	NM_001308176	1000	Hs.464829	NM_001792	ENSG00000170558	CDH2	CD325|CDHN|CDw325|NCAD	cadherin 2	protein-coding
MEIS1_in_LV-MEIS1_peak_1709	chr13	77329206	77329206	+	17.7132	NA	Intergenic	Intergenic	-2164	NM_015057	23077	Hs.591221	NM_015057	ENSG00000005810	MYCBP2	Myc-bp2|PAM|Phr	MYC binding protein 2, E3 ubiquitin protein ligase	protein-coding
MEIS1_in_LV-MEIS1_peak_1748	chr13	94140842	94140842	+	17.7132	NA	intron (NM_005708, intron 4 of 8)	intron (NM_005708, intron 4 of 8)	47149	NR_046535	100873972	Hs.670344	NR_046535	ENSG00000236520	GPC6-AS1	-	GPC6 antisense RNA 1	ncRNA
MEIS1_in_LV-MEIS1_peak_3244	chr21	17549929	17549929	+	17.7132	NA	intron (NM_001207065, intron 2 of 2)	intron (NM_001207065, intron 2 of 2)	37023	NM_001207064	1525	Hs.627078	NM_001338	ENSG00000154639	CXADR	CAR|CAR4/6|HCAR	CXADR, Ig-like cell adhesion molecule	protein-coding
MEIS1_in_LV-MEIS1_peak_3185	chr20	45374023	45374023	+	17.7132	NA	intron (NM_014477, intron 4 of 4)	intron (NM_014477, intron 4 of 4)	4294	NM_014477	27296	Hs.710271	NM_014477	ENSG00000124251	TP53TG5	C20orf10|CLG01	TP53 target 5	protein-coding
MEIS1_in_LV-MEIS1_peak_4082	chr4	119730313	119730313	+	17.7132	NA	Intergenic	Intergenic	74202	NR_110660	101927007	Hs.143958	NR_110660	ENSG00000250772	LINC01365	-	long intergenic non-protein coding RNA 1365	ncRNA
MEIS1_in_LV-MEIS1_peak_2492	chr18	67754980	67754980	+	17.7132	NA	intron (NR_033921, intron 1 of 4)	L1MA4|LINE|L1	-238250	NM_032160	92126	Hs.124673	NM_032160	ENSG00000171451	DSEL	C18orf4|DE-epi2	dermatan sulfate epimerase like	protein-coding
MEIS1_in_LV-MEIS1_peak_2220	chr16	84947113	84947113	+	17.7132	NA	Intergenic	L1MC4|LINE|L1	64422	NM_017740	55625	Hs.461610	NM_017740	ENSG00000153786	ZDHHC7	DHHC7|SERZ-B|SERZ1|ZNF370	zinc finger DHHC-type containing 7	protein-coding
MEIS1_in_LV-MEIS1_peak_1913	chr14	68938150	68938150	+	17.7132	NA	intron (NM_001102, intron 1 of 20)	intron (NM_001102, intron 1 of 20)	41216	NM_001130004	87	Hs.235750	NM_001102	ENSG00000072110	ACTN1	BDPLT15	actinin alpha 1	protein-coding
MEIS1_in_LV-MEIS1_peak_2622	chr19	21020498	21020498	+	17.7132	NA	promoter-TSS (NM_001172671)	promoter-TSS (NM_001172671)	-122	NM_001172671	80264	Hs.729202	NM_025189	ENSG00000118620	ZNF430	-	zinc finger protein 430	protein-coding
MEIS1_in_LV-MEIS1_peak_2748	chr19_GL949752v1_alt	368638	368638	+	17.7132	NA	promoter-TSS (NM_001301782).3	promoter-TSS (NM_001301782).3	-236	NM_001301782	94059	Hs.590976	NM_198988	ENSG00000275183	LENG9	-	leukocyte receptor cluster member 9	protein-coding
MEIS1_in_LV-MEIS1_peak_148	chr1	75423734	75423734	+	17.7132	NA	intron (NM_001320285, intron 2 of 25)	intron (NM_001320285, intron 2 of 25)	187380	NM_152697	204962	Hs.654821	NM_152697	ENSG00000137968	SLC44A5	CTL5	solute carrier family 44 member 5	protein-coding
MEIS1_in_LV-MEIS1_peak_4572	chr5	173144960	173144960	+	17.7132	NA	intron (NM_013980, intron 1 of 5)	intron (NM_013980, intron 1 of 5)	518	NM_013980	662	Hs.145726	NM_001205	ENSG00000113734	BNIP1	NIP1|SEC20|TRG-8	BCL2 interacting protein 1	protein-coding
MEIS1_in_LV-MEIS1_peak_4070	chr4	114293759	114293759	+	17.7132	NA	Intergenic	Tigger4|DNA|TcMar-Tigger	-304643	NM_001322112	7368	Hs.144197	NM_003360	ENSG00000174607	UGT8	CGT|UGT4	UDP glycosyltransferase 8	protein-coding
MEIS1_in_LV-MEIS1_peak_3199	chr20	53738604	53738604	+	17.7132	NA	Intergenic	Intergenic	130250	NR_134576	105372672	Hs.259350	NR_134576	ENSG00000235415	LOC105372672	-	uncharacterized LOC105372672	ncRNA
MEIS1_in_LV-MEIS1_peak_5839	chr9	123678794	123678794	+	17.7132	NA	intron (NM_024820, intron 5 of 20)	intron (NM_024820, intron 5 of 20)	-193172	NR_106972	102465688		NR_106972	ENSG00000274932	MIR7150	hsa-mir-7150	microRNA 7150	ncRNA
MEIS1_in_LV-MEIS1_peak_4270	chr5	30601071	30601071	+	17.7132	NA	Intergenic	Intergenic	-592584	NM_004932	1004	Hs.124776	NM_004932	ENSG00000113361	CDH6	CAD6|KCAD	cadherin 6	protein-coding
MEIS1_in_LV-MEIS1_peak_2579	chr19	12053072	12053072	+	17.7132	NA	promoter-TSS (NM_001080404)	promoter-TSS (NM_001080404)	-105	NM_001080404	729747	Hs.704229	NM_001080404	ENSG00000257446	ZNF878	-	zinc finger protein 878	protein-coding
MEIS1_in_LV-MEIS1_peak_1667	chr13	57583658	57583658	+	17.7132	NA	Intergenic	Intergenic	-47997	NM_001040429	27253	Hs.106511	NM_014459	ENSG00000118946	PCDH17	PCDH68|PCH68	protocadherin 17	protein-coding
MEIS1_in_LV-MEIS1_peak_3090	chr2	218892832	218892832	+	17.7132	NA	exon (NM_025216, exon 4 of 4)	exon (NM_025216, exon 4 of 4)	12299	NM_025216	80326	Hs.121540	NM_025216	ENSG00000135925	WNT10A	OODD|SSPS|STHAG4	Wnt family member 10A	protein-coding
MEIS1_in_LV-MEIS1_peak_3164	chr20	24995057	24995057	+	17.7132	NA	Intergenic	MER20|DNA|hAT-Charlie	-2268	NM_020531	57136	Hs.472330	NM_020531	ENSG00000101474	APMAP	BSCv|C20orf3	adipocyte plasma membrane associated protein	protein-coding
MEIS1_in_LV-MEIS1_peak_4340	chr5	71752911	71752911	+	17.7132	NA	Intergenic	Intergenic	33748	NM_004291	9607	Hs.1707	NM_004291	ENSG00000164326	CARTPT	CART	CART prepropeptide	protein-coding
MEIS1_in_LV-MEIS1_peak_5048	chr7	44065978	44065978	+	17.7132	NA	promoter-TSS (NM_000290)	promoter-TSS (NM_000290)	-391	NM_000290	5224	Hs.632642	NM_000290	ENSG00000164708	PGAM2	GSD10|PGAM-M|PGAMM	phosphoglycerate mutase 2	protein-coding
MEIS1_in_LV-MEIS1_peak_2760	chr2	3558411	3558411	+	17.7132	NA	promoter-TSS (NR_038431)	promoter-TSS (NR_038431)	24	NR_038431	100506054	Hs.606550	NR_038429	ENSG00000234171	RNASEH1-AS1	-	RNASEH1 antisense RNA 1	ncRNA
MEIS1_in_LV-MEIS1_peak_144	chr1	67880249	67880249	+	17.7132	NA	intron (NR_040077, intron 1 of 9)	L2b|LINE|L2	-46777	NM_018841	55970	Hs.431101	NM_018841	ENSG00000172380	GNG12	-	G protein subunit gamma 12	protein-coding
MEIS1_in_LV-MEIS1_peak_5944	chrX	113818524	113818524	+	17.7132	NA	intron (NR_131204, intron 1 of 2)	intron (NR_131204, intron 1 of 2)	119694	NR_131204	105463123	Hs.550218	NR_131204	ENSG00000241743	XACT	-	X active specific transcript (non-protein coding)	ncRNA
MEIS1_in_LV-MEIS1_peak_3849	chr3	195961008	195961008	+	17.7132	NA	intron (NR_003264, intron 16 of 16)	intron (NR_003264, intron 16 of 16)	29271	NR_003264	255812	Hs.566872	NR_003264	ENSG00000185485	SDHAP1	SDHAL1|SDHALP1	succinate dehydrogenase complex flavoprotein subunit A pseudogene 1	pseudo
MEIS1_in_LV-MEIS1_peak_2928	chr2	111416407	111416407	+	17.7132	NA	intron (NR_136166, intron 1 of 4)	intron (NR_136166, intron 1 of 4)	78754	NR_136164	541471	Hs.560805	NR_015395	ENSG00000172965	MIR4435-2HG	AGD2|LINC00978|MIR4435-1HG|MORRBID|lncRNA-AWPPH	MIR4435-2 host gene	ncRNA
MEIS1_in_LV-MEIS1_peak_150	chr1	76069088	76069088	+	17.7132	NA	Intergenic	MER58B|DNA|hAT-Charlie	-5616	NM_152996	256435	Hs.337040	NM_152996	ENSG00000184005	ST6GALNAC3	PRO7177|SIAT7C|ST6GALNACIII|STY	ST6 N-acetylgalactosaminide alpha-2,6-sialyltransferase 3	protein-coding
MEIS1_in_LV-MEIS1_peak_1585	chr12	124518646	124518646	+	17.7132	NA	intron (NM_001077261, intron 2 of 47)	intron (NM_001077261, intron 2 of 47)	48818	NM_006312	9612	Hs.137510	NM_006312	ENSG00000196498	NCOR2	CTG26|N-CoR2|SMAP270|SMRT|SMRTE|SMRTE-tau|TNRC14|TRAC|TRAC-1|TRAC1	nuclear receptor corepressor 2	protein-coding
MEIS1_in_LV-MEIS1_peak_2152	chr16	52603247	52603247	+	17.7132	NA	intron (NR_033920, intron 1 of 3)	intron (NR_033920, intron 1 of 3)	3728	NR_033920	643714	Hs.662199	NR_033920	ENSG00000249231	CASC16	LINC00918	cancer susceptibility 16 (non-protein coding)	ncRNA
MEIS1_in_LV-MEIS1_peak_4453	chr5	124662479	124662479	+	17.7132	NA	intron (NM_020747, intron 2 of 8)	intron (NM_020747, intron 2 of 8)	82633	NM_020747	57507	Hs.266616	NM_020747	ENSG00000168916	ZNF608	NY-REN-36	zinc finger protein 608	protein-coding
MEIS1_in_LV-MEIS1_peak_2219	chr16	84841971	84841971	+	17.7132	NA	intron (NM_031476, intron 2 of 14)	intron (NM_031476, intron 2 of 14)	21990	NM_031476	83716	Hs.513779	NM_031476	ENSG00000103196	CRISPLD2	CRISP11|LCRISP2|LGL1	cysteine rich secretory protein LCCL domain containing 2	protein-coding
MEIS1_in_LV-MEIS1_peak_3353	chr22	45290825	45290825	+	17.7132	NA	intron (NM_006953, intron 4 of 5)	MER1A|DNA|hAT-Charlie	5838	NM_006953	7380	Hs.632787	NM_006953	ENSG00000100373	UPK3A	UP3A|UPIII|UPIIIA|UPK3	uroplakin 3A	protein-coding
MEIS1_in_LV-MEIS1_peak_4376	chr5	94362052	94362052	+	17.7132	NA	intron (NM_001145678, intron 20 of 20)	intron (NM_001145678, intron 20 of 20)	-250353	NM_001163417	83989	Hs.600086	NM_032042	ENSG00000113391	FAM172A	C5orf21	family with sequence similarity 172 member A	protein-coding
MEIS1_in_LV-MEIS1_peak_885	chr11	8739531	8739531	+	17.7132	NA	intron (NM_213618, intron 2 of 19)	intron (NM_213618, intron 2 of 19)	-29247	NR_120590	102724784	Hs.613276	NR_120590		LOC102724784	-	uncharacterized LOC102724784	ncRNA
MEIS1_in_LV-MEIS1_peak_1632	chr13	44221933	44221933	+	17.7132	NA	Intergenic	Intergenic	-25733	NR_107046	102465876		NR_107046	ENSG00000276319	MIR8079	hsa-mir-8079	microRNA 8079	ncRNA
MEIS1_in_LV-MEIS1_peak_3270	chr21	36719704	36719704	+	17.7132	NA	intron (NM_009586, intron 3 of 9)	intron (NM_009586, intron 3 of 9)	20571	NM_005069	6493	Hs.146186	NM_005069	ENSG00000159263	SIM2	HMC13F06|HMC29C01|SIM|bHLHe15	SIM bHLH transcription factor 2	protein-coding
MEIS1_in_LV-MEIS1_peak_850	chr10	109977478	109977478	+	17.7132	NA	intron (NR_038943, intron 2 of 4)	intron (NR_038943, intron 2 of 4)	-18872	NM_001320591	120	Hs.501012	NM_001121	ENSG00000148700	ADD3	ADDL|CPSQ3	adducin 3	protein-coding
MEIS1_in_LV-MEIS1_peak_5914	chrX	66902244	66902244	+	17.7132	NA	Intergenic	Intergenic	-262946	NR_136726	60401	Hs.302017	NM_021783	ENSG00000131080	EDA2R	EDA-A2R|EDAA2R|TNFRSF27|XEDAR	ectodysplasin A2 receptor	protein-coding
MEIS1_in_LV-MEIS1_peak_2964	chr2	154450170	154450170	+	17.7132	NA	intron (NM_001301627, intron 11 of 11)	intron (NM_001301627, intron 11 of 11)	7268	NM_001256368	100144595	Hs.683952	NM_001256368		LOC100144595	-	uncharacterized LOC100144595	protein-coding
MEIS1_in_LV-MEIS1_peak_4326	chr5	61934139	61934139	+	17.7132	NA	Intergenic	Intergenic	-198441	NR_105000	100506526	Hs.662277	NR_105000		C5orf64-AS1	-	C5orf64 antisense RNA 1	ncRNA
MEIS1_in_LV-MEIS1_peak_706	chr10	22230597	22230597	+	17.7132	NA	Intergenic	Intergenic	-20614	NM_001199938	340900	Hs.450519	NM_001199938	ENSG00000223601	EBLN1	EBLN-1	endogenous Bornavirus like nucleoprotein 1	protein-coding
MEIS1_in_LV-MEIS1_peak_2952	chr2	131227006	131227006	+	17.7132	NA	intron (NM_001083538, intron 4 of 14)	intron (NM_001083538, intron 4 of 14)	8655	NM_001083538	445582	Hs.686146	NM_001004054	ENSG00000188219	POTEE	A26C1|A26C1A|CT104.2|POTE-2|POTE2|POTE2gamma	POTE ankyrin domain family member E	protein-coding
MEIS1_in_LV-MEIS1_peak_1842	chr14	37641343	37641343	+	17.7132	NA	intron (NM_001310135, intron 3 of 32)	intron (NM_001310135, intron 3 of 32)	46144	NM_001310135	319089	Hs.659936	NM_001007795	ENSG00000139865	TTC6	C14orf25|NCRNA00291	tetratricopeptide repeat domain 6	protein-coding
MEIS1_in_LV-MEIS1_peak_2971	chr2	158796850	158796850	+	17.7132	NA	intron (NM_001017920, intron 1 of 3)	intron (NM_001017920, intron 1 of 3)	1533	NM_001017920	92196	Hs.59761	NM_001017920	ENSG00000163331	DAPL1	-	death associated protein like 1	protein-coding
MEIS1_in_LV-MEIS1_peak_777	chr10	72626155	72626155	+	17.7132	NA	promoter-TSS (NM_001195518)	promoter-TSS (NM_001195518)	36	NM_001195518	10367	Hs.524367	NM_006077	ENSG00000107745	MICU1	CALC|CBARA1|EFHA3|MPXPS	mitochondrial calcium uptake 1	protein-coding
MEIS1_in_LV-MEIS1_peak_5743	chr9	72540114	72540114	+	17.7132	NA	intron (NM_138691, intron 1 of 23)	MSTB1|LTR|ERVL-MaLR	18313	NM_138691	117531	Hs.670211	NM_138691	ENSG00000165091	TMC1	DFNA36|DFNB11|DFNB7	transmembrane channel like 1	protein-coding
MEIS1_in_LV-MEIS1_peak_4632	chr6	26331544	26331544	+	17.7132	NA	Intergenic	Intergenic	-33615	NM_001197248	11118	Hs.376046	NM_007047	ENSG00000186470	BTN3A2	BT3.2|BTF4|BTN3.2|CD277	butyrophilin subfamily 3 member A2	protein-coding
MEIS1_in_LV-MEIS1_peak_3045	chr2	197613675	197613675	+	17.7132	NA	intron (NM_144629, intron 7 of 8)	MamGypsy2-LTR|LTR|Gypsy	62185	NM_144629	130132	Hs.591615	NM_144629	ENSG00000162944	RFTN2	C2orf11|Raftlin-2	raftlin family member 2	protein-coding
MEIS1_in_LV-MEIS1_peak_2257	chr17	14069414	14069414	+	17.7132	NA	promoter-TSS (NM_001303)	promoter-TSS (NM_001303)	12	NM_001303	1352	Hs.462278	NM_001303	ENSG00000006695	COX10	-	COX10, heme A:farnesyltransferase cytochrome c oxidase assembly factor	protein-coding
MEIS1_in_LV-MEIS1_peak_2269	chr17	19190018	19190018	+	17.7132	NA	TTS (NR_006881)	TTS (NR_006881)	227	NR_006881	780853		NR_006881	ENSG00000264940	SNORD3C	RNU3-3|U3-3	small nucleolar RNA, C/D box 3C	snoRNA
MEIS1_in_LV-MEIS1_peak_4642	chr6	34602939	34602939	+	17.7132	NA	intron (NM_024294, intron 4 of 4)	intron (NM_024294, intron 4 of 4)	-46606	NM_012391	25803	Hs.485158	NM_012391	ENSG00000124664	SPDEF	PDEF|bA375E1.3	SAM pointed domain containing ETS transcription factor	protein-coding
MEIS1_in_LV-MEIS1_peak_2186	chr16	68237610	68237610	+	17.7132	NA	Intergenic	CpG-9862	-1377	NM_024939	80004	Hs.436585	NM_024939	ENSG00000103067	ESRP2	RBM35B	epithelial splicing regulatory protein 2	protein-coding
MEIS1_in_LV-MEIS1_peak_5652	chr9	2427187	2427187	+	17.7132	NA	Intergenic	Intergenic	-194587	NM_001322225	7436	Hs.370422	NM_003383	ENSG00000147852	VLDLR	CAMRQ1|CARMQ1|CHRMQ1|VLDL-R|VLDLRCH	very low density lipoprotein receptor	protein-coding
MEIS1_in_LV-MEIS1_peak_674	chr10	454992	454992	+	17.7132	NA	intron (NM_014974, intron 3 of 36)	intron (NM_014974, intron 3 of 36)	-172906	NR_106988
MEIS1_in_LV-MEIS1_peak_2037	chr15	63051467	63051467	+	17.7132	NA	intron (NM_001018008, intron 1 of 7)	intron (NM_001018008, intron 1 of 7)	3030	NM_001301289	7168	Hs.133892	NM_000366	ENSG00000140416	TPM1	C15orf13|CMD1Y|CMH3|HEL-S-265|HTM-alpha|LVNC9|TMSA	tropomyosin 1	protein-coding
MEIS1_in_LV-MEIS1_peak_5516	chr8	74818003	74818003	+	17.7132	NA	Intergenic	Intergenic	-6534	NM_015886	51050	Hs.98558	NM_015886	ENSG00000137558	PI15	CRISP8|P24TI|P25TI	peptidase inhibitor 15	protein-coding
MEIS1_in_LV-MEIS1_peak_3192	chr20	49850835	49850835	+	17.7132	NA	exon (NM_001260491, exon 7 of 16)	exon (NM_001260491, exon 7 of 16)	38122	NR_048538	23315	Hs.444202	NM_015266	ENSG00000197818	SLC9A8	NHE-8|NHE8	solute carrier family 9 member A8	protein-coding
MEIS1_in_LV-MEIS1_peak_2382	chr17	78187350	78187350	+	17.7132	NA	promoter-TSS (NM_003258)	promoter-TSS (NM_003258)	33	NM_001010982	125061	Hs.558614	NM_001010982	ENSG00000183077	AFMID	FKF|KF|KFA	arylformamidase	protein-coding
MEIS1_in_LV-MEIS1_peak_2728	chr19	54463965	54463965	+	17.7132	NA	promoter-TSS (NM_001301782)	promoter-TSS (NM_001301782)	-254	NM_001301782	94059	Hs.590976	NM_198988	ENSG00000275183	LENG9	-	leukocyte receptor cluster member 9	protein-coding
MEIS1_in_LV-MEIS1_peak_3352	chr22	42995335	42995335	+	17.7132	NA	intron (NM_001184970, intron 1 of 10)	intron (NM_001184970, intron 1 of 10)	19843	NM_001184970	11252	Hs.162877	NM_007229	ENSG00000100266	PACSIN2	SDPII	protein kinase C and casein kinase substrate in neurons 2	protein-coding
MEIS1_in_LV-MEIS1_peak_5711	chr9	35103205	35103205	+	17.7132	NA	promoter-TSS (NM_001287033)	promoter-TSS (NM_001287033)	-10	NM_001287032	30968	Hs.3439	NM_013442	ENSG00000165283	STOML2	HSPC108|SLP-2	stomatin like 2	protein-coding
MEIS1_in_LV-MEIS1_peak_5606	chr8	116642652	116642652	+	17.7082	NA	Intergenic	Intergenic	-9448	NR_136278	105375713		NR_136278		LOC105375713	-	uncharacterized LOC105375713	ncRNA
MEIS1_in_LV-MEIS1_peak_557	chr1	216466362	216466362	+	17.7082	NA	Intergenic	Intergenic	-42966	NM_206933	7399	Hs.655974	NM_007123	ENSG00000042781	USH2A	RP39|US2|USH2|dJ1111A8.1	usherin	protein-coding
MEIS1_in_LV-MEIS1_peak_4068	chr4	114187777	114187777	+	17.7082	NA	Intergenic	Intergenic	-208055	NM_024590	79642	Hs.22895	NM_024590	ENSG00000180801	ARSJ	ASJ	arylsulfatase family member J	protein-coding
MEIS1_in_LV-MEIS1_peak_1396	chr12	72089922	72089922	+	17.7082	NA	Intergenic	Intergenic	151076	NM_173353	121278	Hs.736576	NM_173353	ENSG00000139287	TPH2	ADHD7|NTPH	tryptophan hydroxylase 2	protein-coding
MEIS1_in_LV-MEIS1_peak_2643	chr19	35214089	35214089	+	17.7053	NA	Intergenic	Intergenic	14636	NM_152481	148109	Hs.128069	NM_152481	ENSG00000177558	FAM187B	TMEM162	family with sequence similarity 187 member B	protein-coding
MEIS1_in_LV-MEIS1_peak_5436	chr8	26202260	26202260	+	17.7053	NA	Intergenic	Intergenic	-89231	NM_002717	5520	Hs.146339	NM_002717	ENSG00000221914	PPP2R2A	B55A|B55ALPHA|PR52A|PR55A|PR55alpha	protein phosphatase 2 regulatory subunit Balpha	protein-coding
MEIS1_in_LV-MEIS1_peak_5693	chr9	32017395	32017395	+	17.6564	NA	Intergenic	L1MEd|LINE|L1	-367208	NM_001278352	48	Hs.567229	NM_002197	ENSG00000122729	ACO1	ACONS|HEL60|IREB1|IREBP|IREBP1|IRP1	aconitase 1	protein-coding
MEIS1_in_LV-MEIS1_peak_580	chr1	222600600	222600600	+	17.6564	NA	Intergenic	MamSINE1|SINE|tRNA-RTE	10641	NR_110614	100506161	Hs.553851	NR_110613	ENSG00000225265	TAF1A-AS1	-	TAF1A antisense RNA 1	ncRNA
MEIS1_in_LV-MEIS1_peak_3689	chr3	150314692	150314692	+	17.5923	NA	intron (NR_110187, intron 1 of 1)	intron (NR_110187, intron 1 of 1)	9055	NR_110186	101928022	Hs.555199	NR_110186		LINC01214	-	long intergenic non-protein coding RNA 1214	ncRNA
MEIS1_in_LV-MEIS1_peak_1230	chr12	31659309	31659309	+	17.5528	NA	promoter-TSS (NM_001135863)	promoter-TSS (NM_001135863)	122	NM_173802	254013	Hs.740628	NM_173802	ENSG00000139160	ETFBKMT	C12orf72|ETFB-KMT|METTL20	electron transfer flavoprotein subunit beta lysine methyltransferase	protein-coding
MEIS1_in_LV-MEIS1_peak_5192	chr7	92064780	92064780	+	17.532	NA	intron (NM_005751, intron 24 of 49)	intron (NM_005751, intron 24 of 49)	69746	NM_000786	1595	Hs.417077	NM_000786	ENSG00000001630	CYP51A1	CP51|CYP51|CYPL1|LDM|P450-14DM|P450L1	cytochrome P450 family 51 subfamily A member 1	protein-coding
MEIS1_in_LV-MEIS1_peak_131	chr1	54564428	54564428	+	17.5261	NA	intron (NM_015547, intron 1 of 16)	intron (NM_015547, intron 1 of 16)	16294	NM_015547	26027	Hs.745173	NM_015547	ENSG00000162390	ACOT11	BFIT|STARD14|THEA|THEM1	acyl-CoA thioesterase 11	protein-coding
MEIS1_in_LV-MEIS1_peak_4527	chr5	147835584	147835584	+	17.4928	NA	intron (NM_003122, intron 1 of 4)	intron (NM_003122, intron 1 of 4)	3647	NM_003122	6690	Hs.407856	NM_003122	ENSG00000164266	SPINK1	PCTT|PSTI|Spink3|TATI|TCP	serine peptidase inhibitor, Kazal type 1	protein-coding
MEIS1_in_LV-MEIS1_peak_1532	chr12	113093267	113093267	+	17.4928	NA	intron (NM_004416, intron 3 of 8)	CpG-5998	35410	NM_004416	1840	Hs.372152	NM_004416	ENSG00000135144	DTX1	RNF140|hDx-1	deltex E3 ubiquitin ligase 1	protein-coding
MEIS1_in_LV-MEIS1_peak_2121	chr16	28924909	28924909	+	17.4928	NA	intron (NM_024816, intron 1 of 12)	CpG	302	NM_024816	79874	Hs.555978	NM_024816	ENSG00000177548	RABEP2	FRA	rabaptin, RAB GTPase binding effector protein 2	protein-coding
MEIS1_in_LV-MEIS1_peak_1470	chr12	95103374	95103374	+	17.4777	NA	intron (NM_018351, intron 14 of 20)	intron (NM_018351, intron 14 of 20)	-29746	NM_001127362	7181	Hs.108301	NM_003297	ENSG00000120798	NR2C1	TR2	nuclear receptor subfamily 2 group C member 1	protein-coding
MEIS1_in_LV-MEIS1_peak_245	chr1	143720962	143720962	+	17.4777	NA	Intergenic	Intergenic	8608	NR_004400	26863		NR_004400	ENSG00000206737	RNVU1-18	RNU1-25|RNU1-25P|RNU1-5|RNU1P1|RNU1P9|U1.15|U1P101|U1P15|vU1.18	RNA, variant U1 small nuclear 18	snRNA
MEIS1_in_LV-MEIS1_peak_2397	chr17_GL000205v2_random	86975	86975	+	17.4642	NA	Intergenic	Intergenic	-29009	NR_003682	403340	Hs.572501	NR_003682		MGC70870	-	C-terminal binding protein 2 pseudogene	pseudo
MEIS1_in_LV-MEIS1_peak_2082	chr15	85896981	85896981	+	17.4628	NA	Intergenic	(TC)n|Simple_repeat|Simple_repeat	71346	NR_049805	100847084		NR_049805	ENSG00000264406	MIR548AP	-	microRNA 548ap	ncRNA
MEIS1_in_LV-MEIS1_peak_683	chr10	7082659	7082659	+	17.4628	NA	Intergenic	MER134|DNA?|DNA?	104125	NR_132972	106635547		NR_132972		SNORD129	-	small nucleolar RNA, C/D box 129	snoRNA
MEIS1_in_LV-MEIS1_peak_4539	chr5	151408747	151408747	+	17.4628	NA	Intergenic	Intergenic	-28245	NM_001308151	206358	Hs.269004	NM_078483	ENSG00000123643	SLC36A1	Dct1|LYAAT1|PAT1|TRAMD3	solute carrier family 36 member 1	protein-coding
MEIS1_in_LV-MEIS1_peak_3062	chr2	207408565	207408565	+	17.4628	NA	Intergenic	Intergenic	-121327	NM_004379	1385	Hs.516646	NM_004379	ENSG00000118260	CREB1	CREB|CREB-1	cAMP responsive element binding protein 1	protein-coding
MEIS1_in_LV-MEIS1_peak_1809	chr14	24920340	24920340	+	17.4628	NA	intron (NM_001304476, intron 3 of 6)	intron (NM_001304476, intron 3 of 6)	128660	NM_001304477	29091	Hs.508958	NM_014178	ENSG00000168952	STXBP6	HSPC156|amisyn	syntaxin binding protein 6	protein-coding
MEIS1_in_LV-MEIS1_peak_4854	chr6	139656304	139656304	+	17.4628	NA	Intergenic	Intergenic	-114769	NR_038399	100132735	Hs.62646	NR_038399	ENSG00000231426	FILNC1	-	FOXO induced long non-coding RNA 1	ncRNA
MEIS1_in_LV-MEIS1_peak_5327	chr7	122136246	122136246	+	17.4628	NA	intron (NM_005763, intron 1 of 23)	intron (NM_005763, intron 1 of 23)	8044	NM_005763	10157	Hs.156738	NM_005763	ENSG00000008311	AASS	LKR/SDH|LKRSDH|LORSDH	aminoadipate-semialdehyde synthase	protein-coding
MEIS1_in_LV-MEIS1_peak_4264	chr5	28998583	28998583	+	17.4628	NA	Intergenic	Intergenic	-66661	NR_109948	101929645	Hs.531878	NR_109948		LOC101929645	-	uncharacterized LOC101929645	ncRNA
MEIS1_in_LV-MEIS1_peak_4047	chr4	101955097	101955097	+	17.4628	NA	intron (NM_001127507, intron 6 of 15)	intron (NM_001127507, intron 6 of 15)	141271	NM_001083907	55024	Hs.480400	NM_017935	ENSG00000153064	BANK1	BANK	B cell scaffold protein with ankyrin repeats 1	protein-coding
MEIS1_in_LV-MEIS1_peak_336	chr1	155071102	155071102	+	17.4628	NA	Intergenic	CpG	-7111	NR_040773	100505666	Hs.657533	NR_040772		DCST1-AS1	-	DCST1 antisense RNA 1	ncRNA
MEIS1_in_LV-MEIS1_peak_3290	chr21	42734478	42734478	+	17.4628	NA	intron (NM_001001580, intron 2 of 13)	intron (NM_001001580, intron 2 of 13)	45516	NR_135517	101928311	Hs.570404	NR_135517	ENSG00000283051	LINC01668	-	long intergenic non-protein coding RNA 1668	ncRNA
MEIS1_in_LV-MEIS1_peak_2284	chr17	29786251	29786251	+	17.4628	NA	intron (NM_001282130, intron 2 of 7)	MER61A|LTR|ERV1	-24819	NM_001282131	85464	Hs.654754	NM_033389	ENSG00000141298	SSH2	SSH-2|SSH-2L	slingshot protein phosphatase 2	protein-coding
MEIS1_in_LV-MEIS1_peak_3128	chr2	236995280	236995280	+	17.4628	NA	Intergenic	L1M6|LINE|L1	60887	NR_135202	93463	Hs.652810	NR_135202	ENSG00000124835	LOC93463	-	uncharacterized LOC93463	ncRNA
MEIS1_in_LV-MEIS1_peak_3157	chr20	14712381	14712381	+	17.4628	NA	intron (NM_080676, intron 5 of 16)	intron (NM_080676, intron 5 of 16)	157997	NR_104193	140848	Hs.570367	NR_104193	ENSG00000227927	MACROD2-IT1	C20orf68|NCRNA00227|bA467D7.4	MACROD2 intronic transcript 1	ncRNA
MEIS1_in_LV-MEIS1_peak_3917	chr4	48333834	48333834	+	17.4628	NA	Intergenic	Intergenic	-7762	NM_020846	57606	Hs.479677	NM_020846	ENSG00000109171	SLAIN2	KIAA1458	SLAIN motif family member 2	protein-coding
MEIS1_in_LV-MEIS1_peak_2142	chr16	46621382	46621382	+	17.4628	NA	promoter-TSS (NM_001324318)	promoter-TSS (NM_001324318)	17	NM_024745	79801	Hs.123253	NM_024745	ENSG00000171241	SHCBP1	PAL	SHC binding and spindle associated 1	protein-coding
MEIS1_in_LV-MEIS1_peak_3900	chr4	38335016	38335016	+	17.4628	NA	Intergenic	Intergenic	188164	NR_110951	101928776	Hs.586147	NR_110951	ENSG00000249534	LINC01258	-	long intergenic non-protein coding RNA 1258	ncRNA
[truncated: 4,282 more rows]
