# Supplementary material for: MEIS-mediated suppression of human prostate cancer growth and metastasis through HOXB13-dependent regulation of proteoglycans
Source: eLife. 2020 Jun 18;9:e53600. doi: 10.7554/eLife.53600 (PMC7371429; doi:10.7554/eLife.53600)
Supplement: Supplementary file 2. — Peaks identified by MACS2 in HOXB13ko-LV-MEIS1ChIP-seq samples vs. input DNA were annotated to the nearest transcription start site (TSS) using HOMER. [file elife-53600-supp2.xlsx]

## Sheet: annotated_MEIS1_in_B13ko-M1
PeakID (cmd=annotatePeaks.pl MEIS1_in_B13ko_summits.bed hg38)	Chr	Start	End	Strand	Peak Score	Focus Ratio/ Region Size	Annotation	Detailed Annotation	Distance to TSS	Nearest PromoterID	Entrez ID	Nearest Unigene	Nearest Refseq	Nearest Ensembl	Gene Name	Gene Alias	Gene Description	Gene Type
MEIS1_in_B13ko_peak_1516	chr5	10271	10271	+	80.7601	NA	Intergenic	(TAACCC)n|Simple_repeat|Simple_repeat	-129987	NM_052909	153478	Hs.535800	NM_052909	ENSG00000153404	PLEKHG4B	-	pleckstrin homology and RhoGEF domain containing G4B	protein-coding
MEIS1_in_B13ko_peak_1065	chr1_KI270713v1_random	21868	21868	+	74.2491	NA	TTS (NR_004408).4	TTS (NR_004408).4	156	NR_004408	26869		NR_004408	ENSG00000207513	RNU1-3	HSD4|RNU1G3	RNA, U1 small nuclear 3	snRNA
MEIS1_in_B13ko_peak_2043	chrX	156030552	156030552	+	73.3104	NA	Intergenic	(TTAGGG)n|Simple_repeat|Simple_repeat	-2369	NR_110561	727856	Hs.740212	NR_110561		DDX11L16	-	DEAD/H-box helicase 11 like 16	pseudo
MEIS1_in_B13ko_peak_2047	chrY	57217072	57217072	+	72.1744	NA	Intergenic	(TTAGGG)n|Simple_repeat|Simple_repeat	-2369	NR_110561	727856	Hs.740212	NR_110561		DDX11L16	-	DEAD/H-box helicase 11 like 16	pseudo
MEIS1_in_B13ko_peak_509	chr12	54359314	54359314	+	72.103	NA	intron (NR_120487, intron 1 of 3)	intron (NR_120487, intron 1 of 3)	5172	NM_020370	53831	Hs.306199	NM_020370	ENSG00000139572	GPR84	EX33|GPCR4	G protein-coupled receptor 84	protein-coding
MEIS1_in_B13ko_peak_325	chr10	10200	10200	+	68.9206	NA	Intergenic	(CTAACC)n|Simple_repeat|Simple_repeat	-1521	NR_110795	102723376	Hs.606852	NR_110795		LOC102723376	-	uncharacterized LOC102723376	ncRNA
MEIS1_in_B13ko_peak_610	chr12	133265114	133265114	+	67.5254	NA	Intergenic	(GGGTTA)n|Simple_repeat|Simple_repeat	-29278	NM_001191054	647589	Hs.703008	NM_001191054	ENSG00000227059	ANHX	-	anomalous homeobox	protein-coding
MEIS1_in_B13ko_peak_204	chr1	167714725	167714725	+	67.2395	NA	Intergenic	tRNA-Pro-CCG|tRNA|tRNA	-7225	NM_024569	9019	Hs.493919	NM_003953	ENSG00000197965	MPZL1	MPZL1b|PZR|PZR1b|PZRa|PZRb	myelin protein zero like 1	protein-coding
MEIS1_in_B13ko_peak_672	chr14	34556214	34556214	+	65.25	NA	TTS (NR_004430).6	TTS (NR_004430).6	175	NR_004430	26871		NR_004430	ENSG00000206652	RNU1-1	HSD1|HU1-1|RNU1|RNU1A|RNU1A3|RNU1G4|Rnu1a1|U1|U1A1	RNA, U1 small nuclear 1	snRNA
MEIS1_in_B13ko_peak_112	chr1	146376933	146376933	+	64.1427	NA	TTS (NR_004400)	TTS (NR_004400)	126	NR_004430	26871		NR_004430	ENSG00000206652	RNU1-1	HSD1|HU1-1|RNU1|RNU1A|RNU1A3|RNU1G4|Rnu1a1|U1|U1A1	RNA, U1 small nuclear 1	snRNA
MEIS1_in_B13ko_peak_671	chr14	34546890	34546890	+	62.5855	NA	TTS (NR_004430).5	TTS (NR_004430).5	176	NR_004421	6060		NR_004421	ENSG00000207389	RNU1-4	HSD2|HSD5|HSD6|HSD7|RNU1|RNU1D2|RNU1E2|RNU1F1|RNU1G1|RNU1G2|U1B2|U1D2|U1E2|U1F	RNA, U1 small nuclear 4	snRNA
MEIS1_in_B13ko_peak_24	chr1	16896106	16896106	+	57.2791	NA	TTS (NR_004400).2	TTS (NR_004400).2	126	NR_004427	26870		NR_004427	ENSG00000207005	RNU1-2	RNU1C1|RNU1C2|U1C1|U1C21	RNA, U1 small nuclear 2	snRNA
MEIS1_in_B13ko_peak_849	chr17	19188219	19188219	+	57.2791	NA	TTS (NR_006880)	TTS (NR_006880)	203	NR_006880	780851		NR_006880	ENSG00000263934	SNORD3A	RNU3|U3	small nucleolar RNA, C/D box 3A	snoRNA
MEIS1_in_B13ko_peak_20	chr1	16514109	16514109	+	56.8516	NA	TTS (NR_004408)	TTS (NR_004408)	176	NR_004427	26870		NR_004427	ENSG00000207005	RNU1-2	RNU1C1|RNU1C2|U1C1|U1C21	RNA, U1 small nuclear 2	snRNA
MEIS1_in_B13ko_peak_401	chr11	63671577	63671577	+	56.3761	NA	5' UTR (NM_015459, exon 1 of 13)	5' UTR (NM_015459, exon 1 of 13)	153	NM_015459	25923	Hs.356719	NM_015459	ENSG00000184743	ATL3	HSN1F	atlastin GTPase 3	protein-coding
MEIS1_in_B13ko_peak_129	chr1	149708662	149708662	+	55.2881	NA	Intergenic	tRNA-Gly-GGG|tRNA|tRNA	7237	NR_111934	644634		NM_001348147		FAM231D	-	family with sequence similarity 231 member D	protein-coding
MEIS1_in_B13ko_peak_514	chr12	56488583	56488583	+	55.1296	NA	promoter-TSS (NM_001280796)	promoter-TSS (NM_001280796)	-169	NM_001280796	27165	Hs.212606	NM_013267	ENSG00000135423	GLS2	GA|GLS|LGA|hLGA	glutaminase 2	protein-coding
MEIS1_in_B13ko_peak_184	chr1	161399757	161399757	+	54.6825	NA	Intergenic	CpG	-31874	NM_001013625	257177	Hs.534593	NM_001013625	ENSG00000188931	CFAP126	C1orf192|Flattop|Fltp	cilia and flagella associated protein 126	protein-coding
MEIS1_in_B13ko_peak_908	chr17	74671497	74671497	+	54.6459	NA	5' UTR (NM_175738, exon 1 of 9)	5' UTR (NM_175738, exon 1 of 9)	380	NM_175738	326624	Hs.351413	NM_175738	ENSG00000172794	RAB37	-	RAB37, member RAS oncogene family	protein-coding
MEIS1_in_B13ko_peak_555	chr12	98504269	98504269	+	54.6459	NA	promoter-TSS (NR_038383)	promoter-TSS (NR_038383)	-414	NR_038383	643770	Hs.129589	NR_038383	ENSG00000245017	LINC02453	-	long intergenic non-protein coding RNA 2453	ncRNA
MEIS1_in_B13ko_peak_102	chr1	145281265	145281265	+	53.5434	NA	TTS (NR_104075)	TTS (NR_104075)	149	NR_104075	101954266		NR_104075	ENSG00000207501	RNVU1-14	RNU1-37|vU1.14	RNA, variant U1 small nuclear 14	snRNA
MEIS1_in_B13ko_peak_848	chr17	19112382	19112382	+	53.3448	NA	TTS (NR_006882)	TTS (NR_006882)	254	NR_006882	780854		NR_006882	ENSG00000281000	SNORD3D	RNU3-4|U3-4	small nucleolar RNA, C/D box 3D	snoRNA
MEIS1_in_B13ko_peak_122	chr1	148522731	148522731	+	53.3287	NA	Intergenic	U1|snRNA|snRNA	-39446	NM_001123068	644591	Hs.534674	NM_001123068	ENSG00000236334	PPIAL4G	COAS-2	peptidylprolyl isomerase A like 4G	protein-coding
MEIS1_in_B13ko_peak_304	chr1	244576462	244576462	+	53.2766	NA	intron (NM_173807, intron 11 of 20)	LTR10E|LTR|ERV1	-76586	NM_016076	51029	Hs.498317	NM_016076	ENSG00000121644	DESI2	C1orf121|CGI-146|DESI|DESI1|DeSI-2|FAM152A|PNAS-4|PPPDE1	desumoylating isopeptidase 2	protein-coding
MEIS1_in_B13ko_peak_847	chr17	19063856	19063856	+	50.7767	NA	TTS (NR_003271).2	TTS (NR_003271).2	280	NR_003924	780852		NR_003924	ENSG00000262074	SNORD3B-2	U3-2B|U3b2	small nucleolar RNA, C/D box 3B-2	snoRNA
MEIS1_in_B13ko_peak_23	chr1	16740652	16740652	+	49.5688	NA	TTS (NR_004408).3	TTS (NR_004408).3	136	NR_004400	26863		NR_004400	ENSG00000206737	RNVU1-18	RNU1-25|RNU1-25P|RNU1-5|RNU1P1|RNU1P9|U1.15|U1P101|U1P15|vU1.18	RNA, variant U1 small nuclear 18	snRNA
MEIS1_in_B13ko_peak_873	chr17	43251736	43251736	+	48.5207	NA	TTS (NR_002716).6	TTS (NR_002716).6	283	NR_002716	6066		NR_002716	ENSG00000274585	RNU2-1	RNU2|U2	RNA, U2 small nuclear 1	snRNA
MEIS1_in_B13ko_peak_870	chr17	43241151	43241151	+	48.2179	NA	TTS (NR_002716).7	TTS (NR_002716).7	219	NR_002716	6066		NR_002716	ENSG00000274585	RNU2-1	RNU2|U2	RNA, U2 small nuclear 1	snRNA
MEIS1_in_B13ko_peak_1515	chr4	190122921	190122921	+	47.4743	NA	Intergenic	(AGGGTT)n|Simple_repeat|Simple_repeat	-50853	NM_001306068	100288687	Hs.728749	NM_001205218	ENSG00000260596	DUX4	DUX4L	double homeobox 4	protein-coding
MEIS1_in_B13ko_peak_22	chr1	16666824	16666824	+	47.0974	NA	TTS (NR_004408).2	TTS (NR_004408).2	124	NR_004421	6060		NR_004421	ENSG00000207389	RNU1-4	HSD2|HSD5|HSD6|HSD7|RNU1|RNU1D2|RNU1E2|RNU1F1|RNU1G1|RNU1G2|U1B2|U1D2|U1E2|U1F	RNA, U1 small nuclear 4	snRNA
MEIS1_in_B13ko_peak_1763	chr7	46468969	46468969	+	46.948	NA	Intergenic	HUERS-P3-int|LTR|ERV1	228153	NR_134575	730338	Hs.640207	NR_134575	ENSG00000233539	LOC730338	-	uncharacterized LOC730338	ncRNA
MEIS1_in_B13ko_peak_309	chr1	246515575	246515575	+	46.6426	NA	TTS (NR_040002)	TTS (NR_040002)	-8233	NM_001167740	64754	Hs.567571	NM_022743	ENSG00000185420	SMYD3	KMT3E|ZMYND1|ZNFN3A1|bA74P14.1	SET and MYND domain containing 3	protein-coding
MEIS1_in_B13ko_peak_869	chr17	43239904	43239904	+	46.1318	NA	TTS (NR_002716).9	TTS (NR_002716).9	207	NR_002716	6066		NR_002716	ENSG00000274585	RNU2-1	RNU2|U2	RNA, U2 small nuclear 1	snRNA
MEIS1_in_B13ko_peak_964	chr18	80263091	80263091	+	46.0939	NA	Intergenic	(GTTAGG)n|Simple_repeat|Simple_repeat	-15577	NM_032510	84552	Hs.654920	NM_032510	ENSG00000178184	PARD6G	PAR-6G|PAR6gamma	par-6 family cell polarity regulator gamma	protein-coding
MEIS1_in_B13ko_peak_976	chr19	3721559	3721559	+	45.6796	NA	promoter-TSS (NM_001267561)	promoter-TSS (NM_001267561)	-140	NM_001267561	27134	Hs.25527	NM_014428	ENSG00000105289	TJP3	ZO-3|ZO3	tight junction protein 3	protein-coding
MEIS1_in_B13ko_peak_195	chr1	161523901	161523901	+	45.4864	NA	promoter-TSS (NM_002155)	promoter-TSS (NM_002155)	-639	NM_002155	3310	Hs.654614	NM_002155	ENSG00000173110	HSPA6	HSP70B'	heat shock protein family A (Hsp70) member 6	protein-coding
MEIS1_in_B13ko_peak_88	chr1	143729456	143729456	+	44.886	NA	TTS (NR_004427)	TTS (NR_004427)	114	NR_004427	26870		NR_004427	ENSG00000207005	RNU1-2	RNU1C1|RNU1C2|U1C1|U1C21	RNA, U1 small nuclear 2	snRNA
MEIS1_in_B13ko_peak_1020	chr19	39402606	39402606	+	44.4285	NA	Intergenic	CpG	-4241	NM_003407	7538	Hs.534052	NM_003407	ENSG00000128016	ZFP36	G0S24|GOS24|NUP475|RNF162A|TIS11|TTP|zfp-36	ZFP36 ring finger protein	protein-coding
MEIS1_in_B13ko_peak_882	chr17	43296401	43296401	+	44.0019	NA	TTS (NR_002716).3	TTS (NR_002716).3	214	NR_002716	6066		NR_002716	ENSG00000274585	RNU2-1	RNU2|U2	RNA, U2 small nuclear 1	snRNA
MEIS1_in_B13ko_peak_332	chr10	37726592	37726592	+	43.6476	NA	Intergenic	REP522|Satellite|telo	68583	NR_051997	100419868	Hs.741719	NR_051997		ZNF33BP1	-	zinc finger protein 33B pseudogene 1	pseudo
MEIS1_in_B13ko_peak_872	chr17	43245715	43245715	+	43.2803	NA	TTS (NR_002716).8	TTS (NR_002716).8	149	NR_002716	6066		NR_002716	ENSG00000274585	RNU2-1	RNU2|U2	RNA, U2 small nuclear 1	snRNA
MEIS1_in_B13ko_peak_1326	chr3	53145559	53145559	+	42.9467	NA	Intergenic	Intergenic	-15105	NM_052859	91869	Hs.631910	NM_052859	ENSG00000163933	RFT1	CDG1N	RFT1 homolog	protein-coding
MEIS1_in_B13ko_peak_880	chr17	43284145	43284145	+	41.7996	NA	TTS (NR_002716).2	TTS (NR_002716).2	184	NR_002716	6066		NR_002716	ENSG00000274585	RNU2-1	RNU2|U2	RNA, U2 small nuclear 1	snRNA
MEIS1_in_B13ko_peak_118	chr1	148038780	148038780	+	41.7817	NA	TTS (NR_004426)	TTS (NR_004426)	136	NR_004426	26864		NR_004426	ENSG00000206585	RNVU1-7	RNU1-26P|RNU1-6|RNU1-6P|RNU1-9|RNU1-9P|RNVU1-9|vU1.7|vU1.9	RNA, variant U1 small nuclear 7	snRNA
MEIS1_in_B13ko_peak_98	chr1	144560710	144560710	+	41.7764	NA	Intergenic	U1|snRNA|snRNA	-32158	NM_001164262	728945		NM_001164262	ENSG00000279782	PPIAL4F	-	peptidylprolyl isomerase A like 4F	protein-coding
MEIS1_in_B13ko_peak_105	chr1	146035716	146035716	+	41.2694	NA	Intergenic	tRNA-Glu-GAG_|tRNA|tRNA	-13894	NM_145277	148738	Hs.632436	NM_145277	ENSG00000168509	HJV	HFE2|HFE2A|JH|RGMC	hemojuvelin BMP co-receptor	protein-coding
MEIS1_in_B13ko_peak_876	chr17	43271360	43271360	+	41.1862	NA	Intergenic	Intergenic	-4537	NR_002716	6066		NR_002716	ENSG00000274585	RNU2-1	RNU2|U2	RNA, U2 small nuclear 1	snRNA
MEIS1_in_B13ko_peak_1375	chr3	129917601	129917601	+	40.7552	NA	Intergenic	LTR10E|LTR|ERV1	23730	NR_037893	100507032	Hs.529562	NR_037893	ENSG00000271270	TMCC1-AS1	-	TMCC1 antisense RNA 1 (head to head)	ncRNA
MEIS1_in_B13ko_peak_583	chr12	120495985	120495985	+	40.7076	NA	promoter-TSS (NM_003746)	promoter-TSS (NM_003746)	-39	NR_038854	100506668	Hs.660080	NR_038854	ENSG00000248008	NRAV	DYNLL1-AS1|DYNLL1AS1	negative regulator of antiviral response (non-protein coding)	ncRNA
MEIS1_in_B13ko_peak_252	chr1	204506600	204506600	+	40.6584	NA	Intergenic	Intergenic	-9779	NM_001278517	4194	Hs.497492	NM_002393	ENSG00000198625	MDM4	HDMX|MDMX|MRP1	MDM4, p53 regulator	protein-coding
MEIS1_in_B13ko_peak_1871	chr7	152733450	152733450	+	40.6584	NA	Intergenic	LTR10E|LTR|ERV1	-26299	NR_073000
MEIS1_in_B13ko_peak_109	chr1	146052132	146052132	+	40.6584	NA	promoter-TSS (NR_125967)	promoter-TSS (NR_125967)	112	NR_104085	101954276		NR_104085	ENSG00000201558	RNVU1-6	RNU1-99|vU1.6	RNA, variant U1 small nuclear 6	snRNA
MEIS1_in_B13ko_peak_130	chr1	149712630	149712630	+	40.2645	NA	Intergenic	Intergenic	11205	NR_111934	644634		NM_001348147		FAM231D	-	family with sequence similarity 231 member D	protein-coding
MEIS1_in_B13ko_peak_154	chr1	151737689	151737689	+	39.5373	NA	Intergenic	MSTA-int|LTR|ERVL-MaLR	16152	NM_001144956	284485	Hs.297967	NM_001144956	ENSG00000178796	RIIAD1	C1orf230|NCRNA00166	regulatory subunit of type II PKA R-subunit (RIIa) domain containing 1	protein-coding
MEIS1_in_B13ko_peak_878	chr17	43277947	43277947	+	39.5148	NA	TTS (NR_002716).4	TTS (NR_002716).4	221	NR_002716	6066		NR_002716	ENSG00000274585	RNU2-1	RNU2|U2	RNA, U2 small nuclear 1	snRNA
MEIS1_in_B13ko_peak_1468	chr4	41294657	41294657	+	39.4821	NA	Intergenic	LTR18A|LTR|ERVL	37776	NM_004181	7345	Hs.518731	NM_004181	ENSG00000154277	UCHL1	HEL-117|HEL-S-53|NDGOA|PARK5|PGP 9.5|PGP9.5|PGP95|SPG79|Uch-L1	ubiquitin C-terminal hydrolase L1	protein-coding
MEIS1_in_B13ko_peak_554	chr12	98503553	98503553	+	39.4821	NA	intron (NR_038383, intron 1 of 3)	tRNA-Asp-GAY|tRNA|tRNA	302	NR_038383	643770	Hs.129589	NR_038383	ENSG00000245017	LINC02453	-	long intergenic non-protein coding RNA 2453	ncRNA
MEIS1_in_B13ko_peak_594	chr12	124939676	124939676	+	39.4821	NA	Intergenic	tRNA-Asp-GAY|tRNA|tRNA	24129	NR_049820	100847004		NR_049820	ENSG00000265345	MIR5188	mir-5188	microRNA 5188	ncRNA
MEIS1_in_B13ko_peak_992	chr19	10836661	10836661	+	39.4821	NA	promoter-TSS (NR_104015)	promoter-TSS (NR_104015)	-354	NM_006858	11018	Hs.211463	NM_006858	ENSG00000099203	TMED1	IL1RL1LG|Il1rl1l|Tp24|p24g1	transmembrane p24 trafficking protein 1	protein-coding
MEIS1_in_B13ko_peak_437	chr11	118436365	118436365	+	39.3614	NA	promoter-TSS (NM_001197104)	promoter-TSS (NM_001197104)	-125	NM_001197104	4297	Hs.258855	NM_005933	ENSG00000118058	KMT2A	ALL-1|CXXC7|HRX|HTRX1|MLL|MLL1|MLL1A|TRX1|WDSTS	lysine methyltransferase 2A	protein-coding
MEIS1_in_B13ko_peak_205	chr1	167715564	167715564	+	38.6248	NA	Intergenic	Intergenic	-6386	NM_024569	9019	Hs.493919	NM_003953	ENSG00000197965	MPZL1	MPZL1b|PZR|PZR1b|PZRa|PZRb	myelin protein zero like 1	protein-coding
MEIS1_in_B13ko_peak_225	chr1	184290342	184290342	+	37.6258	NA	Intergenic	LTR18A|LTR|ERVL	-96674	NM_030806	81563	Hs.497159	NM_030806	ENSG00000116667	C1orf21	PIG13	chromosome 1 open reading frame 21	protein-coding
MEIS1_in_B13ko_peak_236	chr1	196535903	196535903	+	37.6183	NA	intron (NM_198503, intron 1 of 27)	LTR18A|LTR|ERVL	46578	NR_039888	100616363		NR_039888	ENSG00000265986	MIR4735	-	microRNA 4735	ncRNA
MEIS1_in_B13ko_peak_883	chr17	43299987	43299987	+	37.5595	NA	TTS (NR_002716)	TTS (NR_002716)	244	NR_002716	6066		NR_002716	ENSG00000274585	RNU2-1	RNU2|U2	RNA, U2 small nuclear 1	snRNA
MEIS1_in_B13ko_peak_1160	chr20	41600032	41600032	+	37.0663	NA	intron (NM_032221, intron 1 of 36)	LTR10B1|LTR|ERV1	18462	NM_032221	84181	Hs.740645	NM_032221	ENSG00000124177	CHD6	CHD-6|CHD5|RIGB	chromodomain helicase DNA binding protein 6	protein-coding
MEIS1_in_B13ko_peak_770	chr16	3152903	3152903	+	37.0663	NA	Intergenic	tRNA-Arg-AGG|tRNA|tRNA	8612	NR_132322	197350	Hs.434132	NR_132322	ENSG00000228146	CASP16P	CASP16	caspase 16, pseudogene	pseudo
MEIS1_in_B13ko_peak_946	chr18	59054983	59054983	+	37.0663	NA	Intergenic	Intergenic	19304	NR_024021	390858	Hs.716280	NR_024021		OACYLP	ACYL3P	O-acyltransferase like, pseudogene	pseudo
MEIS1_in_B13ko_peak_1387	chr3	149086720	149086720	+	36.8112	NA	promoter-TSS (NM_003071)	promoter-TSS (NM_003071)	-166	NM_001318934	6596	Hs.3068	NM_003071	ENSG00000071794	HLTF	HIP116|HIP116A|HLTF1|RNF80|SMARCA3|SNF2L3|ZBU1	helicase like transcription factor	protein-coding
MEIS1_in_B13ko_peak_197	chr1	161531154	161531154	+	36.7125	NA	Intergenic	tRNA-Gly-GGA|tRNA|tRNA	6614	NM_002155	3310	Hs.654614	NM_002155	ENSG00000173110	HSPA6	HSP70B'	heat shock protein family A (Hsp70) member 6	protein-coding
MEIS1_in_B13ko_peak_881	chr17	43290242	43290242	+	36.6842	NA	Intergenic	Intergenic	-5913	NR_002716	6066		NR_002716	ENSG00000274585	RNU2-1	RNU2|U2	RNA, U2 small nuclear 1	snRNA
MEIS1_in_B13ko_peak_653	chr13	114354211	114354211	+	36.3723	NA	Intergenic	(AGGGTT)n|Simple_repeat|Simple_repeat	-20263	NR_126391	104355150	Hs.569217	NR_126391		LINC01054	-	long intergenic non-protein coding RNA 1054	ncRNA
MEIS1_in_B13ko_peak_736	chr15	64387796	64387796	+	35.8663	NA	promoter-TSS (NM_016213)	promoter-TSS (NM_016213)	-8	NM_016213	9325	Hs.500340	NM_016213	ENSG00000103671	TRIP4	ASC-1|ASC1|HsT17391|MDCDC|SMABF1|ZC2HC5	thyroid hormone receptor interactor 4	protein-coding
MEIS1_in_B13ko_peak_860	chr17	39047179	39047179	+	35.8663	NA	intron (NR_033753, intron 4 of 4)	LTR10E|LTR|ERV1	-9840	NR_036551	100131347	Hs.676510	NR_036551	ENSG00000263818	LOC100131347	-	RAD52 motif containing 1 pseudogene	pseudo
MEIS1_in_B13ko_peak_1548	chr5	68933030	68933030	+	35.8663	NA	Intergenic	LTR18A|LTR|ERVL	96897	NR_130778	101928885	Hs.630474	NR_130778		LINC02198	-	long intergenic non-protein coding RNA 2198	ncRNA
MEIS1_in_B13ko_peak_833	chr17	8139515	8139515	+	35.8663	NA	TTS (NM_002616)	TTS (NM_002616)	5556	NR_106943	102465532		NR_106943	ENSG00000284117	MIR6883	hsa-mir-6883	microRNA 6883	ncRNA
MEIS1_in_B13ko_peak_1019	chr19	38862783	38862783	+	35.8663	NA	Intergenic	LTR35A|LTR|ERV1	-10444	NM_001005335	3191	Hs.644906	NM_001533	ENSG00000104824	HNRNPL	HNRPL|P/OKcl.14|hnRNP-L	heterogeneous nuclear ribonucleoprotein L	protein-coding
MEIS1_in_B13ko_peak_106	chr1	146037095	146037095	+	35.6794	NA	Intergenic	tRNA-Gly-GGA|tRNA|tRNA	15149	NR_104085	101954276		NR_104085	ENSG00000201558	RNVU1-6	RNU1-99|vU1.6	RNA, variant U1 small nuclear 6	snRNA
MEIS1_in_B13ko_peak_1069	chr1_KI270765v1_alt	71950	71950	+	35.1058	NA	Intergenic	Intergenic	-32210	NM_001164261	645142	Hs.730589	NM_001164261	ENSG00000256374	PPIAL4D	-	peptidylprolyl isomerase A like 4D	protein-coding
MEIS1_in_B13ko_peak_877	chr17	43273059	43273059	+	35.0755	NA	Intergenic	Intergenic	5109	NR_002716	6066		NR_002716	ENSG00000274585	RNU2-1	RNU2|U2	RNA, U2 small nuclear 1	snRNA
MEIS1_in_B13ko_peak_592	chr12	124927370	124927370	+	35.0755	NA	Intergenic	tRNA-Asp-GAY|tRNA|tRNA	11823	NR_049820	100847004		NR_049820	ENSG00000265345	MIR5188	mir-5188	microRNA 5188	ncRNA
MEIS1_in_B13ko_peak_663	chr14	20684015	20684015	+	35.0755	NA	promoter-TSS (NM_001282192)	promoter-TSS (NM_001282192)	-162	NM_001145	283	Hs.283749	NM_001145	ENSG00000214274	ANG	ALS9|HEL168|RAA1|RNASE4|RNASE5	angiogenin	protein-coding
MEIS1_in_B13ko_peak_1359	chr3	123590891	123590891	+	34.9205	NA	intron (NR_038266, intron 1 of 2)	THE1D-int|LTR|ERVL-MaLR	5378	NR_038266	100506826	Hs.556600	NR_038266	ENSG00000239523	MYLK-AS1	-	MYLK antisense RNA 1	ncRNA
MEIS1_in_B13ko_peak_963	chr18	80022882	80022882	+	34.6836	NA	intron (NM_001305564, intron 1 of 2)	LTR25-int|LTR|ERV1	11053	NM_001305564	10907	Hs.465498	NM_006701	ENSG00000141759	TXNL4A	BMKS|DIB1|DIM1|SNRNP15|TXNL4|U5-15kD	thioredoxin like 4A	protein-coding
MEIS1_in_B13ko_peak_1075	chr2	6845543	6845543	+	34.6836	NA	intron (NM_001256478, intron 3 of 3)	HUERS-P3-int|LTR|ERV1	-5079	NR_126359	104326052	Hs.7155	NR_126359		NRIR	lncRNA-CMPK2	negative regulator of interferon response (non-protein coding)	ncRNA
MEIS1_in_B13ko_peak_285	chr1	229844848	229844848	+	34.2519	NA	Intergenic	MER70B|LTR|ERVL	-157869	NR_135116	101927532	Hs.40183	NR_135116	ENSG00000228058	LINC01736	-	long intergenic non-protein coding RNA 1736	ncRNA
MEIS1_in_B13ko_peak_1136	chr2	226379537	226379537	+	34.0172	NA	Intergenic	Intergenic	236743	NR_046102	646736	Hs.712836	NR_046102		LOC646736	-	uncharacterized LOC646736	ncRNA
MEIS1_in_B13ko_peak_1673	chr6	73521043	73521043	+	34.0172	NA	promoter-TSS (NM_001402)	promoter-TSS (NM_001402)	-11	NM_001402	1915	Hs.535192	NM_001402	ENSG00000156508	EEF1A1	CCS-3|CCS3|EE1A1|EEF-1|EEF1A|EF-Tu|EF1A|GRAF-1EF|HNGC:16303|LENG7|PTI1|eEF1A-1	eukaryotic translation elongation factor 1 alpha 1	protein-coding
MEIS1_in_B13ko_peak_1870	chr7	152704970	152704970	+	33.98	NA	Intergenic	LTR10A|LTR|ERV1	-28805	NM_005431	7516	Hs.647093	NM_005431	ENSG00000196584	XRCC2	FANCU	X-ray repair cross complementing 2	protein-coding
MEIS1_in_B13ko_peak_1544	chr5	59713327	59713327	+	33.9548	NA	intron (NM_001165899, intron 3 of 16)	LTR18A|LTR|ERVL	-9624	NR_030308	693167		NR_030308	ENSG00000202601	MIR582	MIRN582|hsa-mir-582	microRNA 582	ncRNA
MEIS1_in_B13ko_peak_1858	chr7	146510297	146510297	+	33.9192	NA	intron (NM_014141, intron 1 of 23)	LTR18A|LTR|ERVL	393936	NM_014141	26047	Hs.655684	NM_014141	ENSG00000174469	CNTNAP2	AUTS15|CASPR2|CDFE|NRXN4|PTHSL1	contactin associated protein like 2	protein-coding
MEIS1_in_B13ko_peak_1773	chr7	66125505	66125505	+	33.9192	NA	intron (NM_001040648, intron 1 of 2)	intron (NM_001040648, intron 1 of 2)	10687	NM_014478	27297	Hs.300684	NM_014478	ENSG00000241258	CRCP	CGRP-RCP|CGRPRCP|RCP|RCP9|RPC9	CGRP receptor component	protein-coding
MEIS1_in_B13ko_peak_1776	chr7	66920962	66920962	+	33.825	NA	promoter-TSS (NM_017994)	promoter-TSS (NM_017994)	-254	NM_017994	55069	Hs.488478	NM_017994	ENSG00000106609	TMEM248	C7orf42	transmembrane protein 248	protein-coding
MEIS1_in_B13ko_peak_1504	chr4	150958176	150958176	+	33.4845	NA	intron (NM_006726, intron 2 of 57)	THE1B-int|LTR|ERVL-MaLR	57091	NM_001199282	987	Hs.480938	NM_006726	ENSG00000198589	LRBA	BGL|CDC4L|CVID8|LAB300|LBA	LPS responsive beige-like anchor protein	protein-coding
MEIS1_in_B13ko_peak_263	chr1	212826010	212826010	+	33.0172	NA	Intergenic	LTR10A|LTR|ERV1	21639	NM_001024601	149643	Hs.153274	NM_001024601	ENSG00000185523	SPATA45	C1orf227	spermatogenesis associated 45	protein-coding
MEIS1_in_B13ko_peak_578	chr12	120291772	120291772	+	32.897	NA	TTS (NR_003137)	TTS (NR_003137)	131	NR_003137	26834		NR_003137	ENSG00000202538	RNU4-2	RNU4-1B|RNU4B1|RNU4C|U4A|U4b|U4c	RNA, U4 small nuclear 2	snRNA
MEIS1_in_B13ko_peak_846	chr17	19062066	19062066	+	32.897	NA	TTS (NR_003271)	TTS (NR_003271)	154	NR_003924	780852		NR_003924	ENSG00000262074	SNORD3B-2	U3-2B|U3b2	small nucleolar RNA, C/D box 3B-2	snoRNA
MEIS1_in_B13ko_peak_49	chr1	40508701	40508701	+	32.8635	NA	promoter-TSS (NM_001346946)	promoter-TSS (NM_001346946)	-18	NM_022774	64789	Hs.59584	NM_022774	ENSG00000164002	EXO5	C1orf176|DEM1|Exo V|hExo5	exonuclease 5	protein-coding
MEIS1_in_B13ko_peak_421	chr11	76235888	76235888	+	32.8635	NA	Intergenic	CpG	-29358	NM_004626	7481	Hs.108219	NM_004626	ENSG00000085741	WNT11	HWNT11	Wnt family member 11	protein-coding
MEIS1_in_B13ko_peak_1815	chr7	100177778	100177778	+	32.8452	NA	promoter-TSS (NM_152742)	promoter-TSS (NM_152742)	35	NM_001282718	10734	Hs.592283	NM_012447	ENSG00000066923	STAG3	-	stromal antigen 3	protein-coding
MEIS1_in_B13ko_peak_1816	chr7	100428239	100428239	+	32.4533	NA	promoter-TSS (NM_001194990)	promoter-TSS (NM_001194990)	-551	NM_001194992	56257	Hs.178011	NM_019606	ENSG00000146834	MEPCE	BCDIN3	methylphosphate capping enzyme	protein-coding
MEIS1_in_B13ko_peak_1324	chr3	48617768	48617768	+	32.3406	NA	Intergenic	LTR10E|LTR|ERV1	3988	NM_001008269	440955	Hs.631922	NM_001008269	ENSG00000183396	TMEM89	-	transmembrane protein 89	protein-coding
MEIS1_in_B13ko_peak_1660	chr6	27902948	27902948	+	32.3406	NA	Intergenic	tRNA-Gly-GGY|tRNA|tRNA	9448	NM_033057	81697	Hs.307111	NM_033057	ENSG00000168131	OR2B2	OR2B2Q|OR2B9|OR6-1|dJ193B12.4|hs6M1-10	olfactory receptor family 2 subfamily B member 2	protein-coding
MEIS1_in_B13ko_peak_1687	chr6	107447852	107447852	+	32.3406	NA	intron (NM_020381, intron 1 of 7)	THE1D-int|LTR|ERVL-MaLR	11723	NM_020381	57107	Hs.745008	NM_020381	ENSG00000164494	PDSS2	C6orf210|COQ10D3|DLP1|bA59I9.3|hDLP1	decaprenyl diphosphate synthase subunit 2	protein-coding
MEIS1_in_B13ko_peak_1570	chr5	117713775	117713775	+	32.2065	NA	Intergenic	LTR76|LTR|ERV1	-16586	NR_104997	102467224	Hs.134230	NR_104997		LINC02147	-	long intergenic non-protein coding RNA 2147	ncRNA
MEIS1_in_B13ko_peak_1829	chr7	111796902	111796902	+	31.8065	NA	intron (NM_014705, intron 30 of 51)	HUERS-P3-int|LTR|ERV1	-11603	NR_103806	100506413	Hs.677513	NR_103806	ENSG00000225572	DOCK4-AS1	-	DOCK4 antisense RNA 1	ncRNA
MEIS1_in_B13ko_peak_108	chr1	146039440	146039440	+	31.4432	NA	Intergenic	tRNA-Lys-AAG|tRNA|tRNA	12804	NR_104085	101954276		NR_104085	ENSG00000201558	RNVU1-6	RNU1-99|vU1.6	RNA, variant U1 small nuclear 6	snRNA
MEIS1_in_B13ko_peak_1767	chr7	51607022	51607022	+	31.1802	NA	Intergenic	Intergenic	-290161	NM_015198	23242	Hs.99141	NM_015198	ENSG00000106078	COBL	-	cordon-bleu WH2 repeat protein	protein-coding
MEIS1_in_B13ko_peak_400	chr11	62841620	62841620	+	31.1802	NA	Intergenic	Intergenic	-1464	NM_018093	54663	Hs.654620	NM_018093	ENSG00000133316	WDR74	-	WD repeat domain 74	protein-coding
MEIS1_in_B13ko_peak_1669	chr6	62652861	62652861	+	31.1802	NA	Intergenic	LTR25-int|LTR|ERV1	-366634	NM_152688	202559	Hs.519794	NM_152688	ENSG00000112232	KHDRBS2	SLM-1|SLM1	KH RNA binding domain containing, signal transduction associated 2	protein-coding
MEIS1_in_B13ko_peak_831	chr17	8125762	8125762	+	31.1802	NA	Intergenic	tRNA-Gly-GGY|tRNA|tRNA	-1670	NM_032580	84667	Hs.434828	NM_032580	ENSG00000179111	HES7	SCDO4|bHLHb37	hes family bHLH transcription factor 7	protein-coding
MEIS1_in_B13ko_peak_93	chr1	144412704	144412704	+	31.1525	NA	TTS (NR_104076)	TTS (NR_104076)	128	NR_104076	101954267		NR_104076	ENSG00000207205	RNVU1-15	RNU1-121|RNU1-66|RNVU1-16|vU1.15|vU1.16	RNA, variant U1 small nuclear 15	snRNA
MEIS1_in_B13ko_peak_480	chr12	31608531	31608531	+	30.9886	NA	intron (NR_046909, intron 2 of 2)	LTR10E|LTR|ERV1	-17513	NM_144973	160518	Hs.118166	NM_144973	ENSG00000170456	DENND5B	-	DENN domain containing 5B	protein-coding
MEIS1_in_B13ko_peak_1274	chr22	47021289	47021289	+	30.0242	NA	intron (NM_001284305, intron 10 of 12)	intron (NM_001284305, intron 10 of 12)	-105247	NR_122047	642757	Hs.632786	NR_122047	ENSG00000280080	TBC1D22A-AS1	-	TBC1D22A antisense RNA 1	ncRNA
MEIS1_in_B13ko_peak_868	chr17	43233814	43233814	+	29.9974	NA	TTS (NR_002716).10	TTS (NR_002716).10	163	NR_002716	6066		NR_002716	ENSG00000274585	RNU2-1	RNU2|U2	RNA, U2 small nuclear 1	snRNA
MEIS1_in_B13ko_peak_226	chr1	184622366	184622366	+	29.5316	NA	3' UTR (NM_030806, exon 6 of 6)	3' UTR (NM_030806, exon 6 of 6)	132541	NM_025191	80267	Hs.523811	NM_025191	ENSG00000116406	EDEM3	C1orf22	ER degradation enhancing alpha-mannosidase like protein 3	protein-coding
MEIS1_in_B13ko_peak_1228	chr21	17454817	17454817	+	29.4295	NA	Intergenic	tRNA-Gly-GGY|tRNA|tRNA	15927	NR_037586	100505929	Hs.46707	NM_001005521	ENSG00000232560	LINC01549	C21orf37	long intergenic non-protein coding RNA 1549	ncRNA
MEIS1_in_B13ko_peak_1999	chr9	137716456	137716456	+	29.4295	NA	intron (NM_024757, intron 2 of 26)	intron (NM_024757, intron 2 of 26)	-46566	NR_024341	79813	Hs.495511	NM_024757	ENSG00000181090	EHMT1	EHMT1-IT1|EUHMTASE1|Eu-HMTase1|FP13812|GLP|GLP1|KLEFS1|KMT1D	euchromatic histone lysine methyltransferase 1	protein-coding
MEIS1_in_B13ko_peak_1942	chr9	31776608	31776608	+	29.3575	NA	Intergenic	HERVK11-int|LTR|ERVK	-395118	NR_135134	101929620	Hs.547175	NR_135134	ENSG00000260720	LINC01243	-	long intergenic non-protein coding RNA 1243	ncRNA
MEIS1_in_B13ko_peak_593	chr12	124927878	124927878	+	28.9698	NA	Intergenic	tRNA-Phe-TTY|tRNA|tRNA	12331	NR_049820	100847004		NR_049820	ENSG00000265345	MIR5188	mir-5188	microRNA 5188	ncRNA
MEIS1_in_B13ko_peak_1934	chr8_KI270817v1_alt	46280	46280	+	28.8854	NA	Intergenic	Intergenic	15630	NR_031636	100302147		NR_031636	ENSG00000221768	MIR1302-7	MIRN1302-7|hsa-mir-1302-7	microRNA 1302-7	ncRNA
MEIS1_in_B13ko_peak_984	chr19	6292225	6292225	+	28.8854	NA	Intergenic	MER52-int|LTR|ERV1	-12277	NM_005934	4298	Hs.10095	NM_005934	ENSG00000130382	MLLT1	ENL|LTG19|YEATS1	MLLT1, super elongation complex subunit	protein-coding
MEIS1_in_B13ko_peak_1946	chr9	34652277	34652277	+	28.8854	NA	promoter-TSS (NM_001142784)	promoter-TSS (NM_001142784)	92	NM_001142784	3590	Hs.591088	NM_004512	ENSG00000137070	IL11RA	CRSDA	interleukin 11 receptor subunit alpha	protein-coding
MEIS1_in_B13ko_peak_1161	chr20	45400805	45400805	+	28.8854	NA	intron (NR_003189, intron 3 of 5)	THE1C-int|LTR|ERVL-MaLR	-5188	NM_001197139	55861	Hs.730643	NM_018478	ENSG00000244274	DBNDD2	C20orf35|CK1BP|HSMNP1	dysbindin domain containing 2	protein-coding
MEIS1_in_B13ko_peak_850	chr17	19190044	19190044	+	28.8854	NA	TTS (NR_006881)	TTS (NR_006881)	201	NR_006881	780853		NR_006881	ENSG00000264940	SNORD3C	RNU3-3|U3-3	small nucleolar RNA, C/D box 3C	snoRNA
MEIS1_in_B13ko_peak_1091	chr2	39359615	39359615	+	28.8854	NA	intron (NM_003618, intron 2 of 33)	THE1C-int|LTR|ERVL-MaLR	77697	NM_001270425	8491	Hs.655750	NM_003618	ENSG00000011566	MAP4K3	GLK|MAPKKKK3|MEKKK 3|MEKKK3|RAB8IPL1	mitogen-activated protein kinase kinase kinase kinase 3	protein-coding
MEIS1_in_B13ko_peak_910	chr17	75034471	75034471	+	28.8854	NA	intron (NR_110835, intron 2 of 7)	tRNA-Arg-AGG|tRNA|tRNA	1904	NR_110835	23510	Hs.514468	NM_015353	ENSG00000180901	KCTD2	-	potassium channel tetramerization domain containing 2	protein-coding
MEIS1_in_B13ko_peak_991	chr19	10416820	10416820	+	28.6469	NA	promoter-TSS (NM_001243121)	promoter-TSS (NM_001243121)	47	NM_001243121	5141	Hs.89901	NM_006202	ENSG00000065989	PDE4A	DPDE2|PDE4|PDE46	phosphodiesterase 4A	protein-coding
MEIS1_in_B13ko_peak_1527	chr5	40366181	40366181	+	28.5878	NA	Intergenic	ERVL-B4-int|LTR|ERVL	-313749	NM_000958	5734	Hs.199248	NM_000958	ENSG00000171522	PTGER4	EP4|EP4R	prostaglandin E receptor 4	protein-coding
MEIS1_in_B13ko_peak_1606	chr5	181206904	181206904	+	27.7479	NA	Intergenic	tRNA-Ala-GCG|tRNA|tRNA	-1611	NM_203293	81786	Hs.487412	NM_033342	ENSG00000146054	TRIM7	GNIP|RNF90	tripartite motif containing 7	protein-coding
MEIS1_in_B13ko_peak_569	chr12	111304764	111304764	+	27.7479	NA	TTS (NR_106818)	TTS (NR_106818)	622	NR_106818	102465455		NR_106818	ENSG00000273700	MIR6760	hsa-mir-6760	microRNA 6760	ncRNA
MEIS1_in_B13ko_peak_830	chr17	8120362	8120362	+	27.7479	NA	TTS (NM_001165967)	TTS (NM_001165967)	-1446	NM_001165960	59344	Hs.232770	NM_021628	ENSG00000179148	ALOXE3	ARCI3|E-LOX|eLOX-3|eLOX3	arachidonate lipoxygenase 3	protein-coding
MEIS1_in_B13ko_peak_835	chr17	8186378	8186378	+	27.7479	NA	promoter-TSS (NR_039746)	promoter-TSS (NR_039746)	-567	NR_039746	100616406		NR_039746	ENSG00000283160	MIR4521	mir-4521	microRNA 4521	ncRNA
MEIS1_in_B13ko_peak_1818	chr7	100570348	100570348	+	27.6752	NA	Intergenic	CpG	3299	NM_001168682	100316904	Hs.633863	NM_001168682	ENSG00000205307	SAP25	-	Sin3A associated protein 25	protein-coding
MEIS1_in_B13ko_peak_110	chr1	146191815	146191815	+	27.6498	NA	intron (NM_203458, intron 1 of 4)	intron (NM_203458, intron 1 of 4)	37217	NM_203458	388677	Hs.655156	NM_203458	ENSG00000264343	NOTCH2NL	N2N	notch 2 N-terminal like	protein-coding
MEIS1_in_B13ko_peak_530	chr12	63806308	63806308	+	27.4647	NA	intron (NM_001278237, intron 5 of 5)	L2a|LINE|L2	15848	NR_126167	104169670	Hs.735874	NR_126167	ENSG00000255850	RXYLT1-AS1	TMEM5-AS1	RXYLT1 antisense RNA 1	ncRNA
MEIS1_in_B13ko_peak_254	chr1	205156132	205156132	+	27.4647	NA	intron (NM_015375, intron 10 of 12)	THE1C-int|LTR|ERVL-MaLR	-34110	NM_001193272	5929	Hs.519230	NM_005057	ENSG00000117222	RBBP5	RBQ3|SWD1	RB binding protein 5, histone lysine methyltransferase complex subunit	protein-coding
MEIS1_in_B13ko_peak_1634	chr6	26537543	26537543	+	27.2143	NA	promoter-TSS (NM_006353)	promoter-TSS (NM_006353)	-801	NM_006353	10473	Hs.236774	NM_006353	ENSG00000182952	HMGN4	HMG17L3|NHC	high mobility group nucleosomal binding domain 4	protein-coding
MEIS1_in_B13ko_peak_1097	chr2	66434190	66434190	+	27.1781	NA	promoter-TSS (NR_046438)	promoter-TSS (NR_046438)	-720	NR_046438	730198	Hs.526753	NR_046438		MEIS1-AS3	-	MEIS1 antisense RNA 3	ncRNA
MEIS1_in_B13ko_peak_1480	chr4	70779113	70779113	+	27.1781	NA	intron (NM_001345840, intron 9 of 13)	intron (NM_001345840, intron 9 of 13)	44767	NM_001345840	22902	Hs.740904	NM_014961	ENSG00000018189	RUFY3	RIPX|SINGAR1|ZFYVE30	RUN and FYVE domain containing 3	protein-coding
MEIS1_in_B13ko_peak_313	chr1	247047423	247047423	+	26.9195	NA	intron (NM_033213, intron 1 of 3)	THE1-int|LTR|ERVL-MaLR	31390	NM_033213	93474	Hs.732305	NM_033213	ENSG00000277462	ZNF670	-	zinc finger protein 670	protein-coding
MEIS1_in_B13ko_peak_1830	chr7	111942905	111942905	+	26.8781	NA	intron (NM_014705, intron 10 of 51)	LTR10A|LTR|ERV1	134400	NR_103806	100506413	Hs.677513	NR_103806	ENSG00000225572	DOCK4-AS1	-	DOCK4 antisense RNA 1	ncRNA
MEIS1_in_B13ko_peak_107	chr1	146038050	146038050	+	26.7352	NA	Intergenic	tRNA-His-CAY_|tRNA|tRNA	14194	NR_104085	101954276		NR_104085	ENSG00000201558	RNVU1-6	RNU1-99|vU1.6	RNA, variant U1 small nuclear 6	snRNA
MEIS1_in_B13ko_peak_875	chr17	43266627	43266627	+	26.7061	NA	TTS (NR_002716).5	TTS (NR_002716).5	196	NR_002716	6066		NR_002716	ENSG00000274585	RNU2-1	RNU2|U2	RNA, U2 small nuclear 1	snRNA
MEIS1_in_B13ko_peak_1826	chr7	105711925	105711925	+	26.7061	NA	intron (NM_020725, intron 3 of 11)	MSTA-int|LTR|ERVL-MaLR	-32724	NM_001318229	222255	Hs.745056	NM_020725	ENSG00000146776	ATXN7L1	ATXN7L4	ataxin 7 like 1	protein-coding
MEIS1_in_B13ko_peak_862	chr17	39154526	39154526	+	26.6247	NA	Intergenic	tRNA-Cys-TGY|tRNA|tRNA	-2877	NM_020405	57125	Hs.125036	NM_020405	ENSG00000161381	PLXDC1	TEM3|TEM7	plexin domain containing 1	protein-coding
MEIS1_in_B13ko_peak_340	chr10	61179937	61179937	+	26.6247	NA	Intergenic	Intergenic	163662	NR_108052	100507058	Hs.145227	NR_108052	ENSG00000227244	LINC00845	-	long intergenic non-protein coding RNA 845	ncRNA
MEIS1_in_B13ko_peak_980	chr19	4724650	4724650	+	26.6247	NA	promoter-TSS (NM_139159)	promoter-TSS (NM_139159)	-807	NM_139159	91039	Hs.515081	NM_139159	ENSG00000142002	DPP9	DP9|DPLP9|DPRP-2|DPRP2	dipeptidyl peptidase 9	protein-coding
MEIS1_in_B13ko_peak_1984	chr9	127969738	127969738	+	26.6247	NA	intron (NM_001035254, intron 1 of 10)	intron (NM_001035254, intron 1 of 10)	10795	NM_001035254	399665	Hs.535972	NM_203305	ENSG00000167106	FAM102A	C9orf132|EEIG1|SYM-3A|bA203J24.7	family with sequence similarity 102 member A	protein-coding
MEIS1_in_B13ko_peak_90	chr1	143800104	143800104	+	26.5647	NA	Intergenic	tRNA-Gly-GGG|tRNA|tRNA	7288	NR_111934	644634		NM_001348147		FAM231D	-	family with sequence similarity 231 member D	protein-coding
MEIS1_in_B13ko_peak_101	chr1	145161131	145161131	+	26.4272	NA	Intergenic	tRNA-Gly-GGG|tRNA|tRNA	54940	NR_111958	103091866	Hs.662922	NR_111954	ENSG00000272419	LOC103091866	-	uncharacterized LOC103091866	ncRNA
MEIS1_in_B13ko_peak_603	chr12	132533146	132533146	+	26.4272	NA	intron (NM_001142641, intron 4 of 16)	intron (NM_001142641, intron 4 of 16)	42575	NM_001142641	57666	Hs.411138	NM_001142641	ENSG00000112787	FBRSL1	-	fibrosin like 1	protein-coding
MEIS1_in_B13ko_peak_297	chr1	235670375	235670375	+	26.2972	NA	intron (NM_000081, intron 50 of 52)	LTR10B2|LTR|ERV1	-19621	NM_004485	2786	Hs.159711	NM_004485	ENSG00000168243	GNG4	-	G protein subunit gamma 4	protein-coding
MEIS1_in_B13ko_peak_951	chr18	67300678	67300678	+	26.1758	NA	Intergenic	LTR18B|LTR|ERVL	-215868	NR_033921	643542	Hs.652901	NR_033921	ENSG00000265533	LOC643542	-	uncharacterized LOC643542	ncRNA
MEIS1_in_B13ko_peak_1074	chr2	5022729	5022729	+	26.0666	NA	Intergenic	(CTACTA)n|Simple_repeat|Simple_repeat	-366507	NR_034134	727982	Hs.444391	NR_034134	ENSG00000231532	LINC01249	-	long intergenic non-protein coding RNA 1249	ncRNA
MEIS1_in_B13ko_peak_126	chr1	149428503	149428503	+	25.9847	NA	Intergenic	Intergenic	-155320	NM_001135789	653598	Hs.534674	NM_001135789	ENSG00000263464	PPIAL4C	COAS-2	peptidylprolyl isomerase A like 4C	protein-coding
MEIS1_in_B13ko_peak_321	chr1	248874278	248874278	+	25.7831	NA	Intergenic	tRNA-Glu-GAG_|tRNA|tRNA	-15162	NM_001193328	55657	Hs.377705	NM_017865	ENSG00000171163	ZNF692	AREBP|Zfp692	zinc finger protein 692	protein-coding
MEIS1_in_B13ko_peak_587	chr12	122226543	122226543	+	25.7369	NA	promoter-TSS (NM_001278304)	promoter-TSS (NM_001278304)	25	NM_138930	56616	Hs.169611	NM_019887	ENSG00000184047	DIABLO	DFNA64|SMAC	diablo IAP-binding mitochondrial protein	protein-coding
MEIS1_in_B13ko_peak_1747	chr7	33070454	33070454	+	25.6121	NA	Intergenic	MSTA-int|LTR|ERVL-MaLR	-7657	NM_001002010	51251	Hs.487933	NM_016489	ENSG00000122643	NT5C3A	NT5C3|P5'N-1|P5N-1|PN-I|POMP|PSN1|UMPH|UMPH1|cN-III|hUMP1|p36	5'-nucleotidase, cytosolic IIIA	protein-coding
MEIS1_in_B13ko_peak_1599	chr5	181097092	181097092	+	25.5095	NA	Intergenic	tRNA-Val-GTG|tRNA|tRNA	28212	NM_001258283	26693	Hs.742585	NM_001258283	ENSG00000185372	OR2V1	OR2V1P|OST265	olfactory receptor family 2 subfamily V member 1	protein-coding
MEIS1_in_B13ko_peak_1862	chr7	149348936	149348936	+	25.5095	NA	Intergenic	THE1C-int|LTR|ERVL-MaLR	63655	NR_036573	155060	Hs.490512	NR_015357	ENSG00000244560	LOC155060	-	AI894139 pseudogene	pseudo
MEIS1_in_B13ko_peak_1916	chr8	102528692	102528692	+	25.5095	NA	Intergenic	(GTGCTGT)n|Simple_repeat|Simple_repeat	-22928	NM_024410	4956	Hs.159274	NM_024410	ENSG00000155087	ODF1	CT133|HSPB10|ODF|ODF2|ODF27|ODFP|ODFPG|ODFPGA|ODFPGB|RT7|SODF	outer dense fiber of sperm tails 1	protein-coding
MEIS1_in_B13ko_peak_1370	chr3	128859741	128859741	+	25.5095	NA	Intergenic	LTR4|LTR|ERV1	11800	NR_034179	653712	Hs.653243	NR_034179	ENSG00000231305	LOC653712	-	intraflagellar transport 122 homolog (Chlamydomonas) pseudogene	pseudo
MEIS1_in_B13ko_peak_1929	chr8	143055980	143055980	+	25.5095	NA	Intergenic	Intergenic	15618	NR_031636	100302147		NR_031636	ENSG00000221768	MIR1302-7	MIRN1302-7|hsa-mir-1302-7	microRNA 1302-7	ncRNA
MEIS1_in_B13ko_peak_744	chr15	79915965	79915965	+	25.5095	NA	promoter-TSS (NM_001100879)	promoter-TSS (NM_001100879)	-709	NM_001100879	400410	Hs.729127	NM_001100879	ENSG00000180953	ST20	HCCS-1	suppressor of tumorigenicity 20	protein-coding
MEIS1_in_B13ko_peak_1604	chr5	181188923	181188923	+	25.5095	NA	Intergenic	tRNA-Pro-CCA|tRNA|tRNA	2985	NR_108031	102577426	Hs.277359	NR_108031	ENSG00000248473	LINC01962	-	long intergenic non-protein coding RNA 1962	ncRNA
MEIS1_in_B13ko_peak_391	chr11	59131829	59131829	+	25.5095	NA	Intergenic	THE1B-int|LTR|ERVL-MaLR	-10917	NM_001312910	63901	Hs.150651	NM_022074	ENSG00000166801	FAM111A	GCLEB|KCS2	family with sequence similarity 111 member A	protein-coding
MEIS1_in_B13ko_peak_838	chr17	8221594	8221594	+	25.5095	NA	intron (NR_026951, intron 2 of 2)	CpG	2449	NR_026951	284029	Hs.121692	NM_173621	ENSG00000178977	LINC00324	C17orf44|NCRNA00324	long intergenic non-protein coding RNA 324	ncRNA
MEIS1_in_B13ko_peak_1051	chr19	50842271	50842271	+	25.3776	NA	intron (NR_131203, intron 2 of 2)	intron (NR_131203, intron 2 of 2)	-10748	NM_017509	55554	Hs.567535	NM_017509	ENSG00000174562	KLK15	ACO|HSRNASPH	kallikrein related peptidase 15	protein-coding
MEIS1_in_B13ko_peak_100	chr1	145157161	145157161	+	25.2137	NA	Intergenic	tRNA-Val-GTG|tRNA|tRNA	58910	NR_111958	103091866	Hs.662922	NR_111954	ENSG00000272419	LOC103091866	-	uncharacterized LOC103091866	ncRNA
MEIS1_in_B13ko_peak_44	chr1	31458481	31458481	+	25.0422	NA	Intergenic	LTR10E|LTR|ERV1	-41604	NR_034112	149086	Hs.729905	NR_034112	ENSG00000260386	LINC01225	-	LINC01225 pseudogene	pseudo
MEIS1_in_B13ko_peak_1782	chr7	75806750	75806750	+	24.9713	NA	Intergenic	LTR8A|LTR|ERV1	6965	NM_002991	6369	Hs.247838	NM_002991	ENSG00000106178	CCL24	Ckb-6|MPIF-2|MPIF2|SCYA24	C-C motif chemokine ligand 24	protein-coding
MEIS1_in_B13ko_peak_432	chr11	107082177	107082177	+	24.9713	NA	Intergenic	THE1D-int|LTR|ERVL-MaLR	-63732	NM_000855	2977	Hs.24321	NM_000855	ENSG00000152402	GUCY1A2	GC-SA2|GUC1A2	guanylate cyclase 1 soluble subunit alpha 2	protein-coding
MEIS1_in_B13ko_peak_900	chr17	63842762	63842762	+	24.8758	NA	promoter-TSS (NM_001330439)	promoter-TSS (NM_001330439)	229	NM_001098426	6603	Hs.250581	NM_003077	ENSG00000108604	SMARCD2	BAF60B|CRACD2|PRO2451|Rsc6p|SGD2	SWI/SNF related, matrix associated, actin dependent regulator of chromatin, subfamily d, member 2	protein-coding
MEIS1_in_B13ko_peak_1853	chr7	138429747	138429747	+	24.7994	NA	Intergenic	LTR10B|LTR|ERV1	-30587	NM_015905	8805	Hs.490287	NM_003852	ENSG00000122779	TRIM24	PTC6|RNF82|TF1A|TIF1|TIF1A|TIF1ALPHA|hTIF1	tripartite motif containing 24	protein-coding
MEIS1_in_B13ko_peak_157	chr1	152111883	152111883	+	24.5528	NA	exon (NM_007113, exon 3 of 3)	exon (NM_007113, exon 3 of 3)	3571	NM_007113	7062	Hs.432416	NM_007113	ENSG00000159450	TCHH	THH|THL|TRHY|UHS3	trichohyalin	protein-coding
MEIS1_in_B13ko_peak_568	chr12	110502298	110502298	+	24.5283	NA	promoter-TSS (NM_016226)	promoter-TSS (NM_016226)	-45	NM_001286534	144715	Hs.97794	NM_152442	ENSG00000151164	RAD9B	-	RAD9 checkpoint clamp component B	protein-coding
MEIS1_in_B13ko_peak_1571	chr5	118209942	118209942	+	24.5169	NA	intron (NR_104997, intron 2 of 2)	THE1D-int|LTR|ERVL-MaLR	-72632	NR_104609	100505811	Hs.369776	NR_104609	ENSG00000250427	LINC02148	HNCAT21	long intergenic non-protein coding RNA 2148	ncRNA
MEIS1_in_B13ko_peak_556	chr12	100173066	100173066	+	24.413	NA	intron (NR_024261, intron 1 of 8)	intron (NR_024261, intron 1 of 8)	277	NR_036632	55592	Hs.524660	NM_017600	ENSG00000238105	GOLGA2P5	GOLGA2B|GOLGA2L1	golgin A2 pseudogene 5	pseudo
MEIS1_in_B13ko_peak_413	chr11	68213802	68213802	+	24.413	NA	promoter-TSS (NM_001300907)	promoter-TSS (NM_001300907)	-30	NM_001300908	51111	Hs.632120	NM_016028	ENSG00000110066	KMT5B	CGI-85|CGI85|MRD51|SUV420H1	lysine methyltransferase 5B	protein-coding
MEIS1_in_B13ko_peak_1607	chr5	181207794	181207794	+	24.413	NA	Intergenic	tRNA-Lys-AAG|tRNA|tRNA	-2501	NM_203293	81786	Hs.487412	NM_033342	ENSG00000146054	TRIM7	GNIP|RNF90	tripartite motif containing 7	protein-coding
MEIS1_in_B13ko_peak_839	chr17	8222884	8222884	+	24.413	NA	non-coding (NR_026951, exon 2 of 3)	non-coding (NR_026951, exon 2 of 3)	1159	NR_026951	284029	Hs.121692	NM_173621	ENSG00000178977	LINC00324	C17orf44|NCRNA00324	long intergenic non-protein coding RNA 324	ncRNA
MEIS1_in_B13ko_peak_1617	chr6	10419678	10419678	+	24.413	NA	promoter-TSS (NM_001042425)	promoter-TSS (NM_001042425)	-114	NM_001042425	7020	Hs.519880	NM_003220	ENSG00000137203	TFAP2A	AP-2|AP-2alpha|AP2TF|BOFS|TFAP2	transcription factor AP-2 alpha	protein-coding
MEIS1_in_B13ko_peak_418	chr11	74544203	74544203	+	24.413	NA	Intergenic	LTR18A|LTR|ERVL	-48327	NM_006591	10714	Hs.82502	NM_006591	ENSG00000077514	POLD3	P66|P68|PPP1R128	DNA polymerase delta 3, accessory subunit	protein-coding
MEIS1_in_B13ko_peak_1703	chr6	142593150	142593150	+	24.413	NA	intron (NR_027312, intron 1 of 2)	L1ME2z|LINE|L1	44686	NR_027311	153910	Hs.350819	NR_027311	ENSG00000236366	LOC153910	-	uncharacterized LOC153910	ncRNA
MEIS1_in_B13ko_peak_82	chr1	120850868	120850868	+	24.4027	NA	TTS (NR_104086)	TTS (NR_104086)	117	NR_104086	101954277		NR_104086	ENSG00000275538	RNVU1-19	RNU1-126|RNU1-147|RNVU1-13|vU1.13|vU1.19	RNA, variant U1 small nuclear 19	snRNA
MEIS1_in_B13ko_peak_89	chr1	143735902	143735902	+	24.1276	NA	Intergenic	Intergenic	-6332	NR_004408	26869		NR_004408	ENSG00000207513	RNU1-3	HSD4|RNU1G3	RNA, U1 small nuclear 3	snRNA
MEIS1_in_B13ko_peak_113	chr1	146387607	146387607	+	23.9721	NA	Intergenic	Intergenic	10800	NR_004430	26871		NR_004430	ENSG00000206652	RNU1-1	HSD1|HU1-1|RNU1|RNU1A|RNU1A3|RNU1G4|Rnu1a1|U1|U1A1	RNA, U1 small nuclear 1	snRNA
MEIS1_in_B13ko_peak_1975	chr9	112284053	112284053	+	23.8875	NA	intron (NM_005156, intron 3 of 14)	THE1D-int|LTR|ERVL-MaLR	48973	NM_001244898	9991	Hs.269988	NM_005156	ENSG00000119314	PTBP3	ROD1	polypyrimidine tract binding protein 3	protein-coding
MEIS1_in_B13ko_peak_723	chr15	41660759	41660759	+	23.8875	NA	intron (NM_001164273, intron 1 of 23)	CpG	347	NM_001164273	23269	Hs.187569	NM_001080541	ENSG00000174197	MGA	MAD5|MXD5	MGA, MAX dimerization protein	protein-coding
MEIS1_in_B13ko_peak_158	chr1	152476632	152476632	+	23.8875	NA	Intergenic	THE1C-int|LTR|ERVL-MaLR	-34212	NM_178438	254910	Hs.516410	NM_178438	ENSG00000186207	LCE5A	LEP18|SPRL5A	late cornified envelope 5A	protein-coding
MEIS1_in_B13ko_peak_1569	chr5	117486964	117486964	+	23.8617	NA	intron (NR_046089, intron 3 of 5)	intron (NR_046089, intron 3 of 5)	71452	NR_046089	728342	Hs.434420	NR_046089		LINC00992	-	long intergenic non-protein coding RNA 992	ncRNA
MEIS1_in_B13ko_peak_535	chr12	71436479	71436479	+	23.7828	NA	Intergenic	MSTA-int|LTR|ERVL-MaLR	-3291	NR_110596	8549	Hs.658889	NM_003667	ENSG00000139292	LGR5	FEX|GPR49|GPR67|GRP49|HG38	leucine rich repeat containing G protein-coupled receptor 5	protein-coding
MEIS1_in_B13ko_peak_287	chr1	231499329	231499329	+	23.7057	NA	Intergenic	THE1C-int|LTR|ERVL-MaLR	-22804	NR_033826	645339	Hs.382049	NR_033826		SNRPD2P2	-	small nuclear ribonucleoprotein D2 pseudogene 2	pseudo
MEIS1_in_B13ko_peak_1284	chr22	50807948	50807948	+	23.6019	NA	Intergenic	(AGGGTT)n|Simple_repeat|Simple_repeat	24219	NR_026982	284942	Hs.406135	NM_203302		RPL23AP82	RPL23A_43_1761	ribosomal protein L23a pseudogene 82	pseudo
MEIS1_in_B13ko_peak_94	chr1	144419311	144419311	+	23.5995	NA	Intergenic	tRNA-Asn-AAC|tRNA|tRNA	6735	NR_104076	101954267		NR_104076	ENSG00000207205	RNVU1-15	RNU1-121|RNU1-66|RNVU1-16|vU1.15|vU1.16	RNA, variant U1 small nuclear 15	snRNA
MEIS1_in_B13ko_peak_1748	chr7	33539380	33539380	+	23.5928	NA	intron (NM_001033604, intron 20 of 21)	LTR18C|LTR|ERVL	-365531	NM_133468	168667	Hs.660998	NM_133468	ENSG00000164619	BMPER	CRIM3|CV-2|CV2	BMP binding endothelial regulator	protein-coding
MEIS1_in_B13ko_peak_290	chr1	234544819	234544819	+	23.5168	NA	Intergenic	Intergenic	-13040	NR_038426	100506795	Hs.448989	NR_038426	ENSG00000231768	LINC01354	-	long intergenic non-protein coding RNA 1354	ncRNA
MEIS1_in_B13ko_peak_836	chr17	8186884	8186884	+	23.3267	NA	promoter-TSS (NR_039746)	promoter-TSS (NR_039746)	-61	NR_039746	100616406		NR_039746	ENSG00000283160	MIR4521	mir-4521	microRNA 4521	ncRNA
MEIS1_in_B13ko_peak_1623	chr6	26286559	26286559	+	23.3267	NA	Intergenic	tRNA-Met-i|tRNA|tRNA	-1060	NM_003543	8365	Hs.591790	NM_003543	ENSG00000158406	HIST1H4H	H4/h|H4FH	histone cluster 1 H4 family member h	protein-coding
MEIS1_in_B13ko_peak_753	chr15	92949818	92949818	+	23.3267	NA	TTS (NM_001042572)	TTS (NM_001042572)	45419	NR_036136	100422995		NR_036136	ENSG00000284324	MIR3175	mir-3175	microRNA 3175	ncRNA
MEIS1_in_B13ko_peak_1455	chr4	24965848	24965848	+	23.3267	NA	intron (NM_173463, intron 1 of 12)	LTR18A|LTR|ERVL	14356	NM_173463	91050	Hs.106432	NM_173463	ENSG00000181982	CCDC149	-	coiled-coil domain containing 149	protein-coding
MEIS1_in_B13ko_peak_378	chr11	17371831	17371831	+	23.3267	NA	intron (NM_001202439, intron 4 of 4)	HUERS-P3-int|LTR|ERV1	16828	NM_000525	3767	Hs.248141	NM_000525	ENSG00000187486	KCNJ11	BIR|HHF2|IKATP|KIR6.2|MODY13|PHHI|TNDM3	potassium voltage-gated channel subfamily J member 11	protein-coding
MEIS1_in_B13ko_peak_1949	chr9	37079514	37079514	+	23.3267	NA	promoter-TSS (NR_036592)	promoter-TSS (NR_036592)	-382	NR_036592	100506710	Hs.446271	NR_036592	ENSG00000281649	EBLN3P	EBLN3	endogenous Bornavirus-like nucleoprotein 3, pseudogene	pseudo
MEIS1_in_B13ko_peak_422	chr11	76335223	76335223	+	23.3267	NA	Intergenic	MSTA-int|LTR|ERVL-MaLR	45742	NM_004705	5612	Hs.503315	NM_004705	ENSG00000137492	THAP12	DAP4|P52rIPK|PRKRIR|THAP0	THAP domain containing 12	protein-coding
MEIS1_in_B13ko_peak_178	chr1	159971195	159971195	+	23.3043	NA	intron (NR_038849, intron 1 of 2)	MER77B|LTR|ERVL	9971	NR_038849	100505633	Hs.445045	NR_038849	ENSG00000224259	LINC01133	-	long intergenic non-protein coding RNA 1133	ncRNA
MEIS1_in_B13ko_peak_1392	chr3	149831102	149831102	+	23.1883	NA	intron (NM_007282, intron 2 of 10)	THE1B-int|LTR|ERVL-MaLR	18414	NM_183381	11342	Hs.12333	NM_007282	ENSG00000082996	RNF13	RZF	ring finger protein 13	protein-coding
MEIS1_in_B13ko_peak_1795	chr7	87328519	87328519	+	22.9239	NA	intron (NR_015381, intron 2 of 2)	LTR25-int|LTR|ERV1	16973	NR_015381	11257	Hs.274329	NM_007233	ENSG00000182165	TP53TG1	LINC00096|NCRNA00096|P53TG1|P53TG1-D|TP53AP1	TP53 target 1 (non-protein coding)	ncRNA
MEIS1_in_B13ko_peak_1505	chr4	151548919	151548919	+	22.8196	NA	intron (NM_001109977, intron 3 of 13)	LTR10A|LTR|ERV1	139673	NM_001109977	729830	Hs.633810	NM_001109977	ENSG00000164142	FAM160A1	-	family with sequence similarity 160 member A1	protein-coding
MEIS1_in_B13ko_peak_1756	chr7	40240154	40240154	+	22.8002	NA	intron (NM_001193312, intron 7 of 12)	intron (NM_001193312, intron 7 of 12)	105178	NM_001193312	79783	Hs.586313	NM_024728	ENSG00000175600	SUGCT	C7orf10|DERP13|GA3|ORF19	succinyl-CoA:glutarate-CoA transferase	protein-coding
MEIS1_in_B13ko_peak_1741	chr7	27151016	27151016	+	22.7145	NA	intron (NR_038831, intron 1 of 2)	CpG	-3242	NM_024014	3203	Hs.679517	NM_024014	ENSG00000106006	HOXA6	HOX1|HOX1.2|HOX1B	homeobox A6	protein-coding
MEIS1_in_B13ko_peak_1765	chr7	50093242	50093242	+	22.5331	NA	promoter-TSS (NM_007009)	promoter-TSS (NM_007009)	22	NM_001159878	11055	Hs.388841	NM_007009	ENSG00000042813	ZPBP	ZPBP1	zona pellucida binding protein	protein-coding
MEIS1_in_B13ko_peak_1692	chr6	125780293	125780293	+	22.5208	NA	promoter-TSS (NM_001199620)	promoter-TSS (NM_001199620)	-868	NM_001199620	135112	Hs.171426	NM_181782	ENSG00000111912	NCOA7	ERAP140|ESNA1|NCOA7-AS|Nbla00052|Nbla10993|TLDC4|dJ187J11.3	nuclear receptor coactivator 7	protein-coding
MEIS1_in_B13ko_peak_439	chr11	126226305	126226305	+	22.5208	NA	intron (NM_001330446, intron 1 of 8)	intron (NM_001330446, intron 1 of 8)	14581	NM_024556	79607	Hs.276315	NM_024556	ENSG00000197798	FAM118B	-	family with sequence similarity 118 member B	protein-coding
MEIS1_in_B13ko_peak_1307	chr3	9098808	9098808	+	22.5208	NA	intron (NM_014850, intron 3 of 21)	intron (NM_014850, intron 3 of 21)	-93685	NR_121663	101927416	Hs.475364	NR_121663	ENSG00000228723	SRGAP3-AS2	-	SRGAP3 antisense RNA 2	ncRNA
MEIS1_in_B13ko_peak_532	chr12	65169428	65169428	+	22.5208	NA	promoter-TSS (NM_014319)	promoter-TSS (NM_014319)	-143	NM_014319	23592	Hs.744150	NM_014319	ENSG00000174106	LEMD3	MAN1	LEM domain containing 3	protein-coding
MEIS1_in_B13ko_peak_799	chr16	53185961	53185961	+	22.2453	NA	intron (NM_025134, intron 2 of 38)	THE1C-int|LTR|ERVL-MaLR	30035	NM_001308319	80205	Hs.59159	NM_015287	ENSG00000177200	CHD9	AD013|CHD-9|CReMM|KISH2|PRIC320	chromodomain helicase DNA binding protein 9	protein-coding
MEIS1_in_B13ko_peak_1935	chr9	998812	998812	+	22.2453	NA	Intergenic	CpG	21844	NM_021240	58524	Hs.189174	NM_021240	ENSG00000064218	DMRT3	DMRTA3	doublesex and mab-3 related transcription factor 3	protein-coding
MEIS1_in_B13ko_peak_1608	chr5	181218263	181218263	+	22.2453	NA	Intergenic	Intergenic	4370	NR_039781	100616342		NR_039781	ENSG00000264732	MIR4638	mir-4638	microRNA 4638	ncRNA
MEIS1_in_B13ko_peak_1147	chr2	242183472	242183472	+	22.2453	NA	Intergenic	(AGGGTT)n|Simple_repeat|Simple_repeat	94839	NR_130699	728323	Hs.380737	NR_024437		LINC01881	-	long intergenic non-protein coding RNA 1881	ncRNA
MEIS1_in_B13ko_peak_1774	chr7	66413530	66413530	+	22.2453	NA	Intergenic	CpG	-13122	NR_026873	285908	Hs.50755	NM_181722	ENSG00000179406	LINC00174	NCRNA00174	long intergenic non-protein coding RNA 174	ncRNA
MEIS1_in_B13ko_peak_1477	chr4	64145228	64145228	+	22.2453	NA	Intergenic	HERVK11-int|LTR|ERVK	264232	NM_001010874	253017	Hs.227752	NM_001010874	ENSG00000205678	TECRL	CPVT3|GPSN2L|SRD5A2L2|TERL	trans-2,3-enoyl-CoA reductase like	protein-coding
MEIS1_in_B13ko_peak_1483	chr4	88120140	88120140	+	22.2453	NA	intron (NM_004827, intron 6 of 15)	THE1B-int|LTR|ERVL-MaLR	38719	NM_004827	9429	Hs.480218	NM_004827	ENSG00000118777	ABCG2	ABC15|ABCP|BCRP|BCRP1|BMDP|CD338|CDw338|EST157481|GOUT1|MRX|MXR|MXR-1|MXR1|UAQTL1	ATP binding cassette subfamily G member 2 (Junior blood group)	protein-coding
MEIS1_in_B13ko_peak_660	chr14	20633071	20633071	+	22.2453	NA	Intergenic	tRNA-Pro-CCA|tRNA|tRNA	8620	NM_001001968	341799	Hs.513132	NM_001001968	ENSG00000181803	OR6S1	OR14-37|OR6S1Q	olfactory receptor family 6 subfamily S member 1	protein-coding
MEIS1_in_B13ko_peak_899	chr17	60558058	60558058	+	22.2453	NA	Intergenic	LTR18B|LTR|ERVL	-6488	NR_126009	388406	Hs.368309	NR_126009	ENSG00000267772	LINC01999	-	long intergenic non-protein coding RNA 1999	ncRNA
MEIS1_in_B13ko_peak_745	chr15	79920291	79920291	+	22.2453	NA	intron (NR_037653, intron 1 of 2)	LTR10E|LTR|ERV1	-2480	NR_028330	283687	Hs.722219	NM_175898		ST20-AS1	C15orf37	ST20 antisense RNA 1	ncRNA
MEIS1_in_B13ko_peak_1610	chr5	181222424	181222424	+	22.2453	NA	promoter-TSS (NM_033549)	promoter-TSS (NM_033549)	209	NR_039781	100616342		NR_039781	ENSG00000264732	MIR4638	mir-4638	microRNA 4638	ncRNA
MEIS1_in_B13ko_peak_1654	chr6	27672479	27672479	+	22.2453	NA	Intergenic	tRNA-Ser-TCG|tRNA|tRNA	-21556	NR_038294	100507173	Hs.635987	NR_038292	ENSG00000281706	LINC01012	-	long intergenic non-protein coding RNA 1012	ncRNA
MEIS1_in_B13ko_peak_1879	chr7	158523835	158523835	+	22.2453	NA	intron (NM_130843, intron 1 of 21)	intron (NM_130843, intron 1 of 21)	8978	NR_030325	693180		NR_030325	ENSG00000207637	MIR595	MIRN595|hsa-mir-595	microRNA 595	ncRNA
MEIS1_in_B13ko_peak_1561	chr5	110058218	110058218	+	22.2453	NA	Intergenic	Intergenic	175036	NR_033175	100289673	Hs.368405	NR_033175		LINC01848	-	long intergenic non-protein coding RNA 1848	ncRNA
MEIS1_in_B13ko_peak_417	chr11	72434291	72434291	+	22.2453	NA	exon (NM_001258392, exon 1 of 16)	exon (NM_001258392, exon 1 of 16)	393	NM_001258393	81570	Hs.523877	NM_030813	ENSG00000162129	CLPB	ANKCLB|HSP78|MEGCANN|MGCA7|SKD3	ClpB homolog, mitochondrial AAA ATPase chaperonin	protein-coding
MEIS1_in_B13ko_peak_463	chr12	10234477	10234477	+	22.2453	NA	Intergenic	THE1D-int|LTR|ERVL-MaLR	21587	NM_031412	23710	Hs.524250	NM_031412	ENSG00000139112	GABARAPL1	APG8-LIKE|APG8L|ATG8|ATG8B|ATG8L|GEC1	GABA type A receptor associated protein like 1	protein-coding
MEIS1_in_B13ko_peak_124	chr1	148642541	148642541	+	22.198	NA	Intergenic	Intergenic	-46824	NM_015383	25832	Hs.534675	NM_015383	ENSG00000270629	NBPF14	DJ328E19.C1.1|NBPF	NBPF member 14	protein-coding
MEIS1_in_B13ko_peak_734	chr15	56232273	56232273	+	22.1578	NA	intron (NM_022841, intron 1 of 8)	THE1B-int|LTR|ERVL-MaLR	11012	NM_022841	64864	Hs.745089	NM_022841	ENSG00000181827	RFX7	RFXDC2	regulatory factor X7	protein-coding
MEIS1_in_B13ko_peak_303	chr1	244452285	244452285	+	22.0323	NA	promoter-TSS (NM_001126)	promoter-TSS (NM_001126)	-151	NM_001126	159	Hs.498313	NM_001126	ENSG00000035687	ADSS	ADEH|ADSS 2	adenylosuccinate synthase	protein-coding
MEIS1_in_B13ko_peak_549	chr12	94422340	94422340	+	22.0051	NA	intron (NM_001346461, intron 1 of 7)	LTR10C|LTR|ERV1	37648	NM_001346457	51134	Hs.279209	NM_016122	ENSG00000173588	CEP83	CCDC41|NPHP18|NY-REN-58	centrosomal protein 83	protein-coding
MEIS1_in_B13ko_peak_650	chr13	113584201	113584201	+	21.941	NA	promoter-TSS (NR_026580)	promoter-TSS (NR_026580)	-487	NR_026580	7027	Hs.79353	NM_007111	ENSG00000198176	TFDP1	DILC|DP1|DRTF1|Dp-1	transcription factor Dp-1	protein-coding
MEIS1_in_B13ko_peak_288	chr1	232749295	232749295	+	21.939	NA	Intergenic	LTR10B1|LTR|ERV1	-6580	NR_110683	101927683	Hs.520568	NR_110683	ENSG00000236497	LINC01744	-	long intergenic non-protein coding RNA 1744	ncRNA
MEIS1_in_B13ko_peak_1269	chr22	43089301	43089301	+	21.8754	NA	non-coding (NR_027779, exon 1 of 12)	non-coding (NR_027779, exon 1 of 12)	127	NR_027779	25809	Hs.660298	NM_012263	ENSG00000100271	TTLL1	C22orf7|HS323M22B	tubulin tyrosine ligase like 1	protein-coding
MEIS1_in_B13ko_peak_1129	chr2	197499992	197499992	+	21.8754	NA	promoter-TSS (NM_002156)	promoter-TSS (NM_002156)	-5	NM_002157	3336	Hs.1197	NM_002157	ENSG00000115541	HSPE1	CPN10|EPF|GROES|HSP10	heat shock protein family E (Hsp10) member 1	protein-coding
MEIS1_in_B13ko_peak_54	chr1	46393588	46393588	+	21.8754	NA	promoter-TSS (NM_001441)	promoter-TSS (NM_001441)	-679	NM_001441	2166	Hs.720143	NM_001441	ENSG00000117480	FAAH	FAAH-1|PSAB	fatty acid amide hydrolase	protein-coding
MEIS1_in_B13ko_peak_1412	chr3	175919353	175919353	+	21.7761	NA	Intergenic	THE1B-int|LTR|ERVL-MaLR	-143020	NR_046714	100874245	Hs.614827	NR_046714		NAALADL2-AS1	-	NAALADL2 antisense RNA 1	ncRNA
MEIS1_in_B13ko_peak_1177	chr21	6565674	6565674	+	21.7557	NA	Intergenic	Intergenic	3754	NM_001320719	102724652	Hs.184085	NM_001314050	ENSG00000276076	CRYAA2	CRYAA	crystallin alpha A2	protein-coding
MEIS1_in_B13ko_peak_1656	chr6	27688375	27688375	+	21.7557	NA	Intergenic	Intergenic	-5660	NR_038294	100507173	Hs.635987	NR_038292	ENSG00000281706	LINC01012	-	long intergenic non-protein coding RNA 1012	ncRNA
MEIS1_in_B13ko_peak_56	chr1	53206265	53206265	+	21.7557	NA	intron (NM_000098, intron 3 of 4)	THE1D-int|LTR|ERVL-MaLR	9836	NM_001330589	1376	Hs.713535	NM_000098	ENSG00000157184	CPT2	CPT1|CPTASE|IIAE4	carnitine palmitoyltransferase 2	protein-coding
MEIS1_in_B13ko_peak_925	chr17_GL000205v2_random	89368	89368	+	21.6706	NA	Intergenic	Intergenic	-31402	NR_003682	403340	Hs.572501	NR_003682		MGC70870	-	C-terminal binding protein 2 pseudogene	pseudo
MEIS1_in_B13ko_peak_511	chr12	56190332	56190332	+	21.5463	NA	promoter-TSS (NM_001330288)	promoter-TSS (NM_001330288)	-758	NM_003075	6601	Hs.236030	NM_003075	ENSG00000139613	SMARCC2	BAF170|CRACC2|Rsc8	SWI/SNF related, matrix associated, actin dependent regulator of chromatin subfamily c member 2	protein-coding
MEIS1_in_B13ko_peak_230	chr1	187842981	187842981	+	21.3622	NA	Intergenic	LTR18A|LTR|ERVL	399353	NR_132374	106144535	Hs.568709	NR_132374		LINC01037	-	long intergenic non-protein coding RNA 1037	ncRNA
MEIS1_in_B13ko_peak_1771	chr7	65447211	65447211	+	21.3278	NA	Intergenic	LTR13|LTR|ERVK	73412	NM_001287533	168374	Hs.9521	NM_007139	ENSG00000146757	ZNF92	HEL-203|HPF12|HTF12|TF12	zinc finger protein 92	protein-coding
MEIS1_in_B13ko_peak_1568	chr5	116545658	116545658	+	21.2661	NA	intron (NM_020796, intron 1 of 18)	LTR10A|LTR|ERV1	29268	NM_001300780	57556	Hs.156967	NM_020681	ENSG00000092421	SEMA6A	HT018|SEMA|SEMA6A1|SEMAQ|VIA	semaphorin 6A	protein-coding
MEIS1_in_B13ko_peak_292	chr1	234861905	234861905	+	21.2528	NA	Intergenic	L1ME4b|LINE|L1	102094	NR_125945	101927851	Hs.520684	NR_125945	ENSG00000238005	LOC101927851	-	uncharacterized LOC101927851	ncRNA
MEIS1_in_B13ko_peak_537	chr12	73801486	73801486	+	21.2247	NA	Intergenic	THE1C-int|LTR|ERVL-MaLR	491145	NR_038300	100507377	Hs.455715	NR_038300	ENSG00000251138	LOC100507377	-	uncharacterized LOC100507377	ncRNA
MEIS1_in_B13ko_peak_1039	chr19	49127951	49127951	+	21.1875	NA	exon (NM_003660, exon 2 of 30)	exon (NM_003660, exon 2 of 30)	8562	NM_003660	8541	Hs.413748	NM_003660	ENSG00000177380	PPFIA3	LPNA3	PTPRF interacting protein alpha 3	protein-coding
MEIS1_in_B13ko_peak_40	chr1	28648671	28648671	+	21.1875	NA	promoter-TSS (NR_004407)	promoter-TSS (NR_004407)	71	NR_004407	26824	Hs.640266	NR_004407	ENSG00000274978	RNU11	RNU11-1|U11	RNA, U11 small nuclear	snRNA
MEIS1_in_B13ko_peak_1067	chr1_KI270765v1_alt	57681	57681	+	21.1875	NA	Intergenic	Intergenic	-46479	NM_001164261	645142	Hs.730589	NM_001164261	ENSG00000256374	PPIAL4D	-	peptidylprolyl isomerase A like 4D	protein-coding
MEIS1_in_B13ko_peak_1232	chr21	33367646	33367646	+	21.1875	NA	Intergenic	LTR10B1|LTR|ERV1	-35250	NM_005534	3460	Hs.634632	NM_005534	ENSG00000159128	IFNGR2	AF-1|IFGR2|IFNGT1|IMD28	interferon gamma receptor 2	protein-coding
MEIS1_in_B13ko_peak_1580	chr5	148141943	148141943	+	21.1875	NA	Intergenic	Intergenic	-26603	NM_001001325	408187	Hs.553815	NM_001001325	ENSG00000196800	SPINK14	SPINK5L2	serine peptidase inhibitor, Kazal type 14 (putative)	protein-coding
MEIS1_in_B13ko_peak_1637	chr6	26554188	26554188	+	21.1875	NA	Intergenic	tRNA-Ile-ATT|tRNA|tRNA	-15136	NR_134611	105374988	Hs.551772	NR_134611	ENSG00000284607	LOC105374988	-	uncharacterized LOC105374988	ncRNA
MEIS1_in_B13ko_peak_1645	chr6	27295489	27295489	+	21.1875	NA	Intergenic	tRNA-Gln-CAG|tRNA|tRNA	16743	NM_033482	94026	Hs.729955	NM_033482	ENSG00000158553	POM121L2	POM121-L|POM121L	POM121 transmembrane nucleoporin like 2	protein-coding
MEIS1_in_B13ko_peak_1549	chr5	71653338	71653338	+	21.1875	NA	intron (NM_022132, intron 16 of 16)	intron (NM_022132, intron 16 of 16)	-65825	NM_004291	9607	Hs.1707	NM_004291	ENSG00000164326	CARTPT	CART	CART prepropeptide	protein-coding
MEIS1_in_B13ko_peak_1873	chr7	155124481	155124481	+	21.1875	NA	Intergenic	Intergenic	-52924	NR_038945	100128264	Hs.248137	NR_038945	ENSG00000220575	HTR5A-AS1	HTR5AOS	HTR5A antisense RNA 1	ncRNA
MEIS1_in_B13ko_peak_96	chr1	144546386	144546386	+	21.1875	NA	Intergenic	Intergenic	-46482	NM_001164262	728945		NM_001164262	ENSG00000279782	PPIAL4F	-	peptidylprolyl isomerase A like 4F	protein-coding
MEIS1_in_B13ko_peak_392	chr11	59550592	59550592	+	21.1875	NA	Intergenic	Intergenic	35679	NM_001004711	390199	Hs.553757	NM_001004711	ENSG00000172742	OR4D9	OR11-253	olfactory receptor family 4 subfamily D member 9	protein-coding
MEIS1_in_B13ko_peak_938	chr18	31974128	31974128	+	21.1875	NA	Intergenic	LTR10B1|LTR|ERV1	-31000	NM_014939	22878	Hs.202001	NM_014939	ENSG00000153339	TRAPPC8	GSG1|HsT2706|KIAA1012|TRS85	trafficking protein particle complex 8	protein-coding
MEIS1_in_B13ko_peak_889	chr17	49678368	49678368	+	21.1875	NA	promoter-TSS (NM_001007226)	promoter-TSS (NM_001007226)	-205	NM_001007228	8405	Hs.463382	NM_003563	ENSG00000121067	SPOP	BTBD32|TEF2	speckle type BTB/POZ protein	protein-coding
MEIS1_in_B13ko_peak_942	chr18	46333647	46333647	+	21.1875	NA	promoter-TSS (NR_046357)	promoter-TSS (NR_046357)	-577	NM_152470	494470	Hs.501114	NM_152470	ENSG00000141622	RNF165	ARKL2|RNF111L2	ring finger protein 165	protein-coding
MEIS1_in_B13ko_peak_1733	chr7	22500185	22500185	+	21.1268	NA	promoter-TSS (NM_207342)	promoter-TSS (NM_207342)	97	NM_001164460	256227	Hs.729825	NM_207342	ENSG00000105889	STEAP1B	-	STEAP family member 1B	protein-coding
MEIS1_in_B13ko_peak_1600	chr5	181102303	181102303	+	21.1239	NA	Intergenic	tRNA-Val-GTG|tRNA|tRNA	23001	NM_001258283	26693	Hs.742585	NM_001258283	ENSG00000185372	OR2V1	OR2V1P|OST265	olfactory receptor family 2 subfamily V member 1	protein-coding
MEIS1_in_B13ko_peak_159	chr1	153671278	153671278	+	20.8427	NA	promoter-TSS (NM_001267809)	promoter-TSS (NM_001267809)	-250	NM_001267809	3608	Hs.75117	NM_004515	ENSG00000143621	ILF2	NF45|PRO3063	interleukin enhancer binding factor 2	protein-coding
MEIS1_in_B13ko_peak_1601	chr5	181173694	181173694	+	20.7164	NA	Intergenic	tRNA-Val-GTG|tRNA|tRNA	18214	NR_108031	102577426	Hs.277359	NR_108031	ENSG00000248473	LINC01962	-	long intergenic non-protein coding RNA 1962	ncRNA
MEIS1_in_B13ko_peak_726	chr15	45200414	45200414	+	20.7164	NA	intron (NM_138356, intron 1 of 7)	tRNA-His-CAY_|tRNA|tRNA	761	NM_138356	90525	Hs.310399	NM_138356	ENSG00000138606	SHF	-	Src homology 2 domain containing F	protein-coding
MEIS1_in_B13ko_peak_620	chr13	34335771	34335771	+	20.7164	NA	Intergenic	Intergenic	304914	NR_047036	100874179	Hs.569253	NR_047036	ENSG00000225179	LINC00457	-	long intergenic non-protein coding RNA 457	ncRNA
MEIS1_in_B13ko_peak_1118	chr2	113046772	113046772	+	20.7164	NA	intron (NM_173178, intron 1 of 4)	L1MC3|LINE|L1	6095	NM_014438	27177	Hs.278909	NM_014438	ENSG00000136696	IL36B	FIL1|FIL1-(ETA)|FIL1H|FILI-(ETA)|IL-1F8|IL-1H2|IL1-ETA|IL1F8|IL1H2	interleukin 36 beta	protein-coding
MEIS1_in_B13ko_peak_1456	chr4	25223939	25223939	+	20.7164	NA	Intergenic	LTR76|LTR|ERV1	-10092	NM_018323	55300	Hs.191701	NM_018323	ENSG00000038210	PI4K2B	PI4KIIB|PIK42B	phosphatidylinositol 4-kinase type 2 beta	protein-coding
MEIS1_in_B13ko_peak_1777	chr7	67076327	67076327	+	20.584	NA	intron (NM_018264, intron 10 of 15)	LTR10C|LTR|ERV1	38070	NR_039793	100616310		NR_039793	ENSG00000266525	MIR4650-1	-	microRNA 4650-1	ncRNA
MEIS1_in_B13ko_peak_518	chr12	56758932	56758932	+	20.5363	NA	Intergenic	LTR26|LTR|ERV1	-4286	NM_003725	8630	Hs.524513	NM_003725	ENSG00000025423	HSD17B6	HSE|RODH|SDR9C6	hydroxysteroid 17-beta dehydrogenase 6	protein-coding
MEIS1_in_B13ko_peak_91	chr1	143804057	143804057	+	20.4547	NA	Intergenic	tRNA-Val-GTG|tRNA|tRNA	11241	NR_111934	644634		NM_001348147		FAM231D	-	family with sequence similarity 231 member D	protein-coding
MEIS1_in_B13ko_peak_482	chr12	31682386	31682386	+	20.375	NA	intron (NR_103522, intron 7 of 8)	LTR55|LTR|ERVL?	22711	NM_001135863	254013	Hs.740628	NM_173802	ENSG00000139160	ETFBKMT	C12orf72|ETFB-KMT|METTL20	electron transfer flavoprotein subunit beta lysine methyltransferase	protein-coding
MEIS1_in_B13ko_peak_861	chr17	39153764	39153764	+	20.1448	NA	Intergenic	tRNA-Cys-TGY|tRNA|tRNA	-2115	NM_020405	57125	Hs.125036	NM_020405	ENSG00000161381	PLXDC1	TEM3|TEM7	plexin domain containing 1	protein-coding
MEIS1_in_B13ko_peak_494	chr12	48789706	48789706	+	20.1448	NA	promoter-TSS (NM_015270)	promoter-TSS (NM_015270)	130	NR_110020	100506125	Hs.306727	NR_110019	ENSG00000257660	LOC100506125	-	uncharacterized LOC100506125	ncRNA
MEIS1_in_B13ko_peak_1481	chr4	83378628	83378628	+	20.1448	NA	Intergenic	LTR18B|LTR|ERVL	-43475	NM_006665	10855	Hs.44227	NM_006665	ENSG00000173083	HPSE	HPA|HPA1|HPR1|HPSE1|HSE1	heparanase	protein-coding
MEIS1_in_B13ko_peak_36	chr1	27182065	27182065	+	20.1448	NA	Intergenic	MER51-int|LTR|ERV1	-26935	NM_003047	6548	Hs.469116	NM_003047	ENSG00000090020	SLC9A1	APNH|LIKNS|NHE-1|NHE1|PPP1R143	solute carrier family 9 member A1	protein-coding
MEIS1_in_B13ko_peak_1663	chr6	35908996	35908996	+	20.1448	NA	intron (NR_034069, intron 2 of 15)	THE1D-int|LTR|ERVL-MaLR	12184	NR_034069	6732	Hs.443861	NM_003137	ENSG00000096063	SRPK1	SFRSK1	SRSF protein kinase 1	protein-coding
MEIS1_in_B13ko_peak_1963	chr9	82367288	82367288	+	20.1448	NA	Intergenic	Intergenic	378516	NM_001001670	389763	Hs.209545	NM_001001670	ENSG00000214929	SPATA31D1	FAM75D1	SPATA31 subfamily D member 1	protein-coding
MEIS1_in_B13ko_peak_1071	chr2	2613523	2613523	+	20.1448	NA	Intergenic	Intergenic	-282210	NM_001303052	23040	Hs.434418	NM_015025	ENSG00000186487	MYT1L	MRD39|NZF1|ZC2H2C2|ZC2HC4B|myT1-L	myelin transcription factor 1 like	protein-coding
MEIS1_in_B13ko_peak_1962	chr9	74498462	74498462	+	20.1448	NA	promoter-TSS (NR_125791)	promoter-TSS (NR_125791)	91	NR_125791	103752585	Hs.635501	NR_125791		RORB-AS1	-	RORB antisense RNA 1	ncRNA
MEIS1_in_B13ko_peak_757	chr15	101980988	101980988	+	20.1448	NA	Intergenic	(GGTTAG)n|Simple_repeat|Simple_repeat	-1895	NR_034090	100288486	Hs.644359	NR_034090	ENSG00000248472	DDX11L9	-	DEAD/H-box helicase 11 like 9	pseudo
MEIS1_in_B13ko_peak_16	chr1	11908313	11908313	+	20.1448	NA	TTS (NR_002754)	TTS (NR_002754)	159	NR_002754	26829		NR_002754	ENSG00000199347	RNU5E-1	RNU5E|U5E	RNA, U5E small nuclear 1	snRNA
MEIS1_in_B13ko_peak_1070	chr1_KI270765v1_alt	78841	78841	+	20.1448	NA	Intergenic	tRNA-Asn-AAC|tRNA|tRNA	-25319	NM_001164261	645142	Hs.730589	NM_001164261	ENSG00000256374	PPIAL4D	-	peptidylprolyl isomerase A like 4D	protein-coding
MEIS1_in_B13ko_peak_387	chr11	43880750	43880750	+	20.1448	NA	promoter-TSS (NM_139178)	promoter-TSS (NM_139178)	-57	NM_139178	221120	Hs.720708	NM_139178	ENSG00000166199	ALKBH3	ABH3|DEPC-1|DEPC1|PCA1|hABH3	alkB homolog 3, alpha-ketoglutaratedependent dioxygenase	protein-coding
MEIS1_in_B13ko_peak_382	chr11	27291514	27291514	+	20.1448	NA	Intergenic	LTR18A|LTR|ERVL	-71401	NR_125766	103695435	Hs.196133	NR_125766	ENSG00000254560	BBOX1-AS1	-	BBOX1 antisense RNA 1	ncRNA
MEIS1_in_B13ko_peak_840	chr17	8226284	8226284	+	20.1448	NA	non-coding (NR_046431, exon 22 of 22)	non-coding (NR_046431, exon 22 of 22)	-2241	NR_026951	284029	Hs.121692	NM_173621	ENSG00000178977	LINC00324	C17orf44|NCRNA00324	long intergenic non-protein coding RNA 324	ncRNA
MEIS1_in_B13ko_peak_111	chr1	146370119	146370119	+	20.1068	NA	Intergenic	tRNA-Asn-AAC|tRNA|tRNA	-6688	NR_004421	6060		NR_004421	ENSG00000207389	RNU1-4	HSD2|HSD5|HSD6|HSD7|RNU1|RNU1D2|RNU1E2|RNU1F1|RNU1G1|RNU1G2|U1B2|U1D2|U1E2|U1F	RNA, U1 small nuclear 4	snRNA
MEIS1_in_B13ko_peak_1336	chr3	84849237	84849237	+	20.0367	NA	intron (NR_033860, intron 8 of 20)	MSTA-int|LTR|ERVL-MaLR	20338	NR_033860	440970	Hs.411049	NR_033860	ENSG00000242641	LINC00971	-	long intergenic non-protein coding RNA 971	ncRNA
MEIS1_in_B13ko_peak_1850	chr7	133082304	133082304	+	20.0367	NA	promoter-TSS (NM_001317178)	promoter-TSS (NM_001317178)	-146	NM_017812	54927	Hs.655010	NM_017812	ENSG00000106554	CHCHD3	MINOS3|Mic19|PPP1R22	coiled-coil-helix-coiled-coil-helix domain containing 3	protein-coding
MEIS1_in_B13ko_peak_1174	chr21	6369736	6369736	+	19.9574	NA	Intergenic	Intergenic	90346	NM_001321072	875	Hs.533013	NM_000071	ENSG00000160200	CBS	HIP4	cystathionine-beta-synthase	protein-coding
MEIS1_in_B13ko_peak_348	chr10	76114221	76114221	+	19.9485	NA	intron (NR_131178, intron 6 of 7)	intron (NR_131178, intron 6 of 7)	331460	NM_032024	83938	Hs.118161	NM_032024	ENSG00000148655	LRMDA	C10orf11|CDA017	leucine rich melanocyte differentiation associated	protein-coding
MEIS1_in_B13ko_peak_269	chr1	218507815	218507815	+	19.9485	NA	intron (NR_031644, intron 2 of 6)	THE1C-int|LTR|ERVL-MaLR	65189	NR_125715	103611157	Hs.133379	NR_125715	ENSG00000281453	TGFB2-OT1	-	TGFB2 overlapping transcript 1	ncRNA
MEIS1_in_B13ko_peak_940	chr18	42644852	42644852	+	19.7561	NA	intron (NR_046174, intron 7 of 9)	MER89|LTR|ERV1	458184	NR_046458	284260	Hs.652819	NR_046174	ENSG00000267586	LINC00907	-	long intergenic non-protein coding RNA 907	ncRNA
MEIS1_in_B13ko_peak_1672	chr6	72947737	72947737	+	19.7561	NA	intron (NM_001160133, intron 1 of 14)	intron (NM_001160133, intron 1 of 14)	20016	NR_036244	100423005		NR_036244	ENSG00000266180	MIR4282	-	microRNA 4282	ncRNA
MEIS1_in_B13ko_peak_399	chr11	62223354	62223354	+	19.6903	NA	Intergenic	LTR10E|LTR|ERV1	14686	NM_002407	4246	Hs.97644	NM_002407	ENSG00000124939	SCGB2A1	LPHC|LPNC|MGB2|UGB3	secretoglobin family 2A member 1	protein-coding
MEIS1_in_B13ko_peak_405	chr11	65096105	65096105	+	19.6903	NA	promoter-TSS (NM_013265)	promoter-TSS (NM_013265)	-10	NM_013265	738	Hs.277517	NM_013265	ENSG00000149823	VPS51	ANG2|ANG3|C11orf2|C11orf3|FFR	VPS51, GARP complex subunit	protein-coding
MEIS1_in_B13ko_peak_902	chr17	64438128	64438128	+	19.6903	NA	Intergenic	THE1D-int|LTR|ERVL-MaLR	-10987	NM_001291317	284021	Hs.631749	NM_001085423	ENSG00000271605	MILR1	Allergin-1|C17orf60|MCA-32|MCA32	mast cell immunoglobulin like receptor 1	protein-coding
MEIS1_in_B13ko_peak_806	chr16	78099531	78099531	+	19.6903	NA	non-coding (NR_120436, exon 1 of 6)	non-coding (NR_120436, exon 1 of 6)	118	NR_120436	51741	Hs.461453	NM_016373	ENSG00000186153	WWOX	D16S432E|EIEE28|FOR|FRA16D|HHCMA56|PRO0128|SCAR12|SDR41C1|WOX1	WW domain containing oxidoreductase	protein-coding
MEIS1_in_B13ko_peak_1556	chr5	83265513	83265513	+	19.6848	NA	intron (NM_022550, intron 7 of 7)	intron (NM_022550, intron 7 of 7)	-188060	NM_174909	153339	Hs.355606	NM_174909	ENSG00000174695	TMEM167A	TMEM167	transmembrane protein 167A	protein-coding
MEIS1_in_B13ko_peak_1715	chr7	263844	263844	+	19.6376	NA	Intergenic	Intergenic	-26326	NM_001195127	100288524	Hs.702860	NM_001195127	ENSG00000248767	WI2-2373I1.2	-	forkhead box L1-like	ncRNA
MEIS1_in_B13ko_peak_103	chr1	145287823	145287823	+	19.6376	NA	Intergenic	tRNA-Asn-AAC|tRNA|tRNA	6707	NR_104075	101954266		NR_104075	ENSG00000207501	RNVU1-14	RNU1-37|vU1.14	RNA, variant U1 small nuclear 14	snRNA
MEIS1_in_B13ko_peak_752	chr15	89129862	89129862	+	19.6376	NA	intron (NM_152924, intron 3 of 10)	MIRb|SINE|MIR	41712	NM_007011	11057	Hs.122337	NM_007011	ENSG00000140526	ABHD2	HS1-2|LABH2|PHPS1-2	abhydrolase domain containing 2	protein-coding
MEIS1_in_B13ko_peak_1720	chr7	768434	768434	+	19.609	NA	intron (NR_075098, intron 8 of 12)	CpG	-40758	NM_001164759	5575	Hs.520851	NM_002735	ENSG00000188191	PRKAR1B	PRKAR1	protein kinase cAMP-dependent type I regulatory subunit beta	protein-coding
MEIS1_in_B13ko_peak_1788	chr7	77209694	77209694	+	19.2715	NA	intron (NM_020879, intron 2 of 18)	MSTA-int|LTR|ERVL-MaLR	-9861	NM_006682	10875	Hs.520989	NM_006682	ENSG00000127951	FGL2	T49|pT49	fibrinogen like 2	protein-coding
MEIS1_in_B13ko_peak_969	chr19	1383466	1383466	+	19.2032	NA	promoter-TSS (NM_024407)	promoter-TSS (NM_024407)	-418	NM_024407	374291	Hs.211914	NM_024407	ENSG00000115286	NDUFS7	CI-20|CI-20KD|MY017|PSST	NADH:ubiquinone oxidoreductase core subunit S7	protein-coding
MEIS1_in_B13ko_peak_1357	chr3	122037104	122037104	+	19.1675	NA	Intergenic	MSTA-int|LTR|ERVL-MaLR	-14824	NM_001199800	286676	Hs.98484	NM_175924	ENSG00000145103	ILDR1	DFNB42|ILDR1alpha|ILDR1alpha'|ILDR1beta	immunoglobulin like domain containing receptor 1	protein-coding
MEIS1_in_B13ko_peak_965	chr19	247272	247272	+	19.1637	NA	Intergenic	TAR1|Satellite|telo	43897	NM_177543	8612	Hs.465506	NM_003712	ENSG00000141934	PLPP2	LPP2|PAP-2c|PAP2-g|PPAP2C	phospholipid phosphatase 2	protein-coding
MEIS1_in_B13ko_peak_657	chr14	20613424	20613424	+	19.1172	NA	Intergenic	tRNA-Pro-CCY|tRNA|tRNA	-22601	NM_001024822	493901	Hs.729466	NM_001024822	ENSG00000258436	RNASE12	HEL-S-85p|RAI1	ribonuclease A family member 12 (inactive)	protein-coding
MEIS1_in_B13ko_peak_45	chr1	32351140	32351140	+	19.1172	NA	Intergenic	CpG	11103	NM_001167676	100128071	Hs.512763	NM_001167676	ENSG00000225828	FAM229A	-	family with sequence similarity 229 member A	protein-coding
MEIS1_in_B13ko_peak_724	chr15	42139086	42139086	+	19.1172	NA	Intergenic	LTR22A|LTR|ERVK	17555	NM_213600	255189	Hs.231873	NM_213600	ENSG00000168907	PLA2G4F	PLA2G4FZ	phospholipase A2 group IVF	protein-coding
MEIS1_in_B13ko_peak_1251	chr22	19316898	19316898	+	19.1172	NA	Intergenic	LTR76|LTR|ERV1	-25182	NM_007098	8218	Hs.368266	NM_001835	ENSG00000070371	CLTCL1	CHC22|CLH22|CLTCL|CLTD	clathrin heavy chain like 1	protein-coding
MEIS1_in_B13ko_peak_1021	chr19	39412239	39412239	+	19.1172	NA	promoter-TSS (NM_022835)	promoter-TSS (NM_022835)	-871	NM_022835	64857	Hs.631574	NM_022835	ENSG00000090924	PLEKHG2	ARHGEF42|CLG|CTB-60E11.4|LDAMD	pleckstrin homology and RhoGEF domain containing G2	protein-coding
MEIS1_in_B13ko_peak_334	chr10	44978872	44978872	+	19.1172	NA	promoter-TSS (NM_007021)	promoter-TSS (NM_007021)	10	NM_007021	11067	Hs.93675	NM_007021	ENSG00000165507	DEPP1	C10orf10|DEPP|FIG|Fseg	DEPP1, autophagy regulator	protein-coding
MEIS1_in_B13ko_peak_1104	chr2	74959013	74959013	+	19.1172	NA	intron (NM_019896, intron 1 of 3)	CpG	365	NM_019896	56655	Hs.469060	NM_019896	ENSG00000115350	POLE4	YHHQ1|p12	DNA polymerase epsilon 4, accessory subunit	protein-coding
MEIS1_in_B13ko_peak_978	chr19	3852144	3852144	+	19.1172	NA	non-coding (NR_027149, exon 3 of 3)	non-coding (NR_027149, exon 3 of 3)	16885	NM_015174	23217	Hs.65750	NM_015174	ENSG00000105278	ZFR2	KIAA1086	zinc finger RNA binding protein 2	protein-coding
MEIS1_in_B13ko_peak_1633	chr6	26532946	26532946	+	19.1172	NA	Intergenic	tRNA-Thr-ACY_|tRNA|tRNA	-5398	NM_006353	10473	Hs.236774	NM_006353	ENSG00000182952	HMGN4	HMG17L3|NHC	high mobility group nucleosomal binding domain 4	protein-coding
MEIS1_in_B13ko_peak_211	chr1	171372760	171372760	+	19.0557	NA	Intergenic	Intergenic	33864	NR_002719	7151	Hs.661092	NR_002719		TOP1P1	-	DNA topoisomerase I pseudogene 1	pseudo
MEIS1_in_B13ko_peak_120	chr1	148334627	148334627	+	19.0557	NA	promoter-TSS (NR_049810)	promoter-TSS (NR_049810)	-73	NR_049810	100847044		NR_049810	ENSG00000283676	MIR5087	-	microRNA 5087	ncRNA
MEIS1_in_B13ko_peak_308	chr1	245207239	245207239	+	19.0216	NA	intron (NM_018012, intron 2 of 14)	LTR10B|LTR|ERV1	52254	NM_018012	55083	Hs.143134	NM_018012	ENSG00000162849	KIF26B	-	kinesin family member 26B	protein-coding
MEIS1_in_B13ko_peak_856	chr17	31550105	31550105	+	19.0187	NA	Intergenic	CpG	-9891	NR_029710	406968		NR_029710	ENSG00000207614	MIR193A	MIRN193|MIRN193A|mir-193a	microRNA 193a	ncRNA
MEIS1_in_B13ko_peak_1169	chr20	64286040	64286040	+	18.9297	NA	Intergenic	TAR1|Satellite|telo	-4345	NR_040415	140849	Hs.745565	NR_040415		LINC00266-1	C20orf69|NCRNA00266|NCRNA00266-1|bA476I15.3	long intergenic non-protein coding RNA 266-1	ncRNA
MEIS1_in_B13ko_peak_1685	chr6	106347404	106347404	+	18.9297	NA	Intergenic	Intergenic	-21584	NM_001286108	9474	Hs.486063	NM_004849	ENSG00000057663	ATG5	APG5|APG5-LIKE|APG5L|ASP|SCAR25|hAPG5	autophagy related 5	protein-coding
MEIS1_in_B13ko_peak_695	chr14	80136533	80136533	+	18.6706	NA	Intergenic	LTR18A|LTR|ERVL	-74886	NR_038355	100628307	Hs.623865	NR_038355	ENSG00000258766	DIO2-AS1	-	DIO2 antisense RNA 1	ncRNA
MEIS1_in_B13ko_peak_1546	chr5	68202170	68202170	+	18.6706	NA	Intergenic	Intergenic	12294	NR_105003	102467655	Hs.544102	NR_105003	ENSG00000253787	LINC02219	-	long intergenic non-protein coding RNA 2219	ncRNA
MEIS1_in_B13ko_peak_1859	chr7	147485848	147485848	+	18.5896	NA	intron (NM_014141, intron 10 of 23)	intron (NM_014141, intron 10 of 23)	-107727	NR_031645	100313895		NR_031645	ENSG00000221442	MIR548F4	MIR548F-4|MIRN548F4|hsa-mir-548f-4	microRNA 548f-4	ncRNA
MEIS1_in_B13ko_peak_319	chr1	247210985	247210985	+	18.512	NA	Intergenic	CpG	-8925	NR_037480	100500849		NR_037480	ENSG00000283881	MIR3916	mir-3916	microRNA 3916	ncRNA
MEIS1_in_B13ko_peak_1707	chr6	157187315	157187315	+	18.4983	NA	intron (NM_020732, intron 13 of 19)	intron (NM_020732, intron 13 of 19)	136944	NM_018452	729515	Hs.157212	NM_018452	ENSG00000215712	TMEM242	BM033|C6orf35	transmembrane protein 242	protein-coding
MEIS1_in_B13ko_peak_1004	chr19	16221329	16221329	+	18.4569	NA	intron (NM_001130524, intron 6 of 12)	LTR10E|LTR|ERV1	23475	NM_032493	8907	Hs.71040	NM_032493	ENSG00000072958	AP1M1	AP47|CLAPM2|CLTNM|MU-1A	adaptor related protein complex 1 subunit mu 1	protein-coding
MEIS1_in_B13ko_peak_1437	chr3	196519941	196519941	+	18.3254	NA	Intergenic	HUERS-P3-int|LTR|ERV1	-4575	NM_001077657	255798	Hs.631933	NM_001077657	ENSG00000214097	SMCO1	C3orf43	single-pass membrane protein with coiled-coil domains 1	protein-coding
MEIS1_in_B13ko_peak_219	chr1	181251215	181251215	+	18.2454	NA	Intergenic	HERVK11-int|LTR|ERVK	14827	NR_046249	100287948	Hs.742594	NR_046249	ENSG00000179452	LINC01699	GM140	long intergenic non-protein coding RNA 1699	ncRNA
MEIS1_in_B13ko_peak_536	chr12	73653351	73653351	+	18.2354	NA	Intergenic	MSTA-int|LTR|ERVL-MaLR	494161	NR_110130	101928137	Hs.694666	NR_110130	ENSG00000258123	LINC02444	-	long intergenic non-protein coding RNA 2444	ncRNA
MEIS1_in_B13ko_peak_64	chr1	81800812	81800812	+	18.2334	NA	intron (NM_001330645, intron 1 of 20)	CpG	415	NM_001330645	23266	Hs.24212	NM_012302	ENSG00000117114	ADGRL2	CIRL2|CL2|LEC1|LPHH1|LPHN2	adhesion G protein-coupled receptor L2	protein-coding
MEIS1_in_B13ko_peak_2010	chrUn_GL000218v1	97578	97578	+	18.1878	NA	promoter-TSS (NR_037871)	promoter-TSS (NR_037871)	-124	NR_037872	100233156	Hs.487536	NM_174888		LOC100233156	-	tektin 4 pseudogene	pseudo
MEIS1_in_B13ko_peak_1419	chr3	180889170	180889170	+	18.1623	NA	Intergenic	LTR10G|LTR|ERV1	-18992	NR_109986	101928882	Hs.734668	NR_109986	ENSG00000285336	LOC101928882	-	uncharacterized LOC101928882	ncRNA
MEIS1_in_B13ko_peak_1083	chr2	27050852	27050852	+	18.0912	NA	promoter-TSS (NR_046730)	promoter-TSS (NR_046730)	-571	NR_138023	60509	Hs.138207	NM_021831	ENSG00000084693	AGBL5	CCP5|RP75	ATP/GTP binding protein like 5	protein-coding
MEIS1_in_B13ko_peak_1125	chr2	184528319	184528319	+	18.0912	NA	Intergenic	MER52-int|LTR|ERV1	-70047	NM_194250	91752	Hs.159528	NM_194250	ENSG00000170396	ZNF804A	C2orf10	zinc finger protein 804A	protein-coding
MEIS1_in_B13ko_peak_1272	chr22	44612098	44612098	+	18.0912	NA	intron (NR_044991, intron 3 of 4)	LTR10E|LTR|ERV1	13321	NR_044991	414351	Hs.572878	NR_044991		LINC00229	C22orf10|NCRNA00229|dJ474I12.C22.2	long intergenic non-protein coding RNA 229	ncRNA
MEIS1_in_B13ko_peak_1055	chr19	57566605	57566605	+	18.0912	NA	Intergenic	LTR25-int|LTR|ERV1	-6742	NM_001277091	162972	Hs.180257	NM_153231	ENSG00000251369	ZNF550	-	zinc finger protein 550	protein-coding
MEIS1_in_B13ko_peak_1029	chr19	45478680	45478680	+	18.0912	NA	Intergenic	tRNA-SeC(e)-TGA|tRNA|tRNA	10685	NM_006732	2354	Hs.590958	NM_006732	ENSG00000125740	FOSB	AP-1|G0S3|GOS3|GOSB	FosB proto-oncogene, AP-1 transcription factor subunit	protein-coding
MEIS1_in_B13ko_peak_1545	chr5	60568846	60568846	+	18.0912	NA	Intergenic	MSTA-int|LTR|ERVL-MaLR	-80748	NM_001165899	5144	Hs.117545	NM_006203	ENSG00000113448	PDE4D	ACRDYS2|DPDE3|HSPDE4D|PDE43|PDE4DN2|STRK1	phosphodiesterase 4D	protein-coding
MEIS1_in_B13ko_peak_888	chr17	49192582	49192582	+	18.0912	NA	Intergenic	CpG	16799	NM_031498	2793	Hs.181781	NM_031498	ENSG00000167083	GNGT2	G-GAMMA-8|G-GAMMA-C|GNG8|GNG9|GNGT8	G protein subunit gamma transducin 2	protein-coding
MEIS1_in_B13ko_peak_1122	chr2	180169603	180169603	+	18.0912	NA	Intergenic	THE1D-int|LTR|ERVL-MaLR	-162550	NM_020943	57703	Hs.311363	NM_020943	ENSG00000163510	CWC22	EIF4GL|NCM|fSAPb	CWC22 spliceosome associated protein homolog	protein-coding
MEIS1_in_B13ko_peak_1150	chr20	25514945	25514945	+	18.0912	NA	intron (NM_025176, intron 3 of 23)	MSTA-int|LTR|ERVL-MaLR	70586	NM_001318226	22981	Hs.631508	NM_025176	ENSG00000101004	NINL	NLP	ninein like	protein-coding
MEIS1_in_B13ko_peak_1576	chr5	140726251	140726251	+	18.0912	NA	promoter-TSS (NR_026705)	promoter-TSS (NR_026705)	92	NR_026705	56662		NR_026705	ENSG00000202515	VTRNA1-3	HVG3|VAULTRC3|VR3|hvg-3	vault RNA 1-3	ncRNA
MEIS1_in_B13ko_peak_563	chr12	109052539	109052539	+	18.0912	NA	promoter-TSS (NM_032663)	promoter-TSS (NM_032663)	-31	NM_032663	84749	Hs.486434	NM_032663	ENSG00000135093	USP30	-	ubiquitin specific peptidase 30	protein-coding
MEIS1_in_B13ko_peak_2041	chrX	53071843	53071843	+	18.0912	NA	intron (NM_018969, intron 1 of 1)	intron (NM_018969, intron 1 of 1)	-10517	NM_022117	64061	Hs.136164	NM_022117	ENSG00000184205	TSPYL2	CDA1|CINAP|CTCL|DENTT|HRIHFB2216|NP79|SE204|TSPX	TSPY like 2	protein-coding
MEIS1_in_B13ko_peak_1007	chr19	21947965	21947965	+	18.0912	NA	intron (NM_001329974, intron 3 of 3)	LTR25-int|LTR|ERV1	62978	NM_001329972	7757	Hs.732975	NM_007153	ENSG00000160321	ZNF208	PMIDP|ZNF95	zinc finger protein 208	protein-coding
MEIS1_in_B13ko_peak_1478	chr4	64230916	64230916	+	18.0912	NA	Intergenic	LTR25-int|LTR|ERV1	178544	NM_001010874	253017	Hs.227752	NM_001010874	ENSG00000205678	TECRL	CPVT3|GPSN2L|SRD5A2L2|TERL	trans-2,3-enoyl-CoA reductase like	protein-coding
MEIS1_in_B13ko_peak_665	chr14	23007138	23007138	+	18.0912	NA	intron (NM_001130706, intron 1 of 7)	CpG	3063	NM_021944	60686	Hs.255874	NM_021944	ENSG00000100802	C14orf93	RTFC	chromosome 14 open reading frame 93	protein-coding
MEIS1_in_B13ko_peak_699	chr14	95620884	95620884	+	18.0912	NA	Intergenic	Intergenic	-30294	NR_028288	27004	Hs.510368	NM_012468		TCL6	TNG1|TNG2	T cell leukemia/lymphoma 6 (non-protein coding)	ncRNA
MEIS1_in_B13ko_peak_1785	chr7	76294817	76294817	+	18.0912	NA	Intergenic	Intergenic	-7741	NM_001540	3315	Hs.520973	NM_001540	ENSG00000106211	HSPB1	CMT2F|HEL-S-102|HMN2B|HS.76067|HSP27|HSP28|Hsp25|SRP27	heat shock protein family B (small) member 1	protein-coding
MEIS1_in_B13ko_peak_673	chr14	37206439	37206439	+	18.0912	NA	intron (NM_138731, intron 1 of 13)	THE1B-int|LTR|ERVL-MaLR	8526	NM_001195296	145282	Hs.660396	NM_138731	ENSG00000151338	MIPOL1	CCDC193	mirror-image polydactyly 1	protein-coding
MEIS1_in_B13ko_peak_99	chr1	144567502	144567502	+	18.0912	NA	Intergenic	Intergenic	-25366	NM_001164262	728945		NM_001164262	ENSG00000279782	PPIAL4F	-	peptidylprolyl isomerase A like 4F	protein-coding
MEIS1_in_B13ko_peak_97	chr1	144551826	144551826	+	18.0912	NA	Intergenic	U1|snRNA|snRNA	-41042	NM_001164262	728945		NM_001164262	ENSG00000279782	PPIAL4F	-	peptidylprolyl isomerase A like 4F	protein-coding
MEIS1_in_B13ko_peak_837	chr17	8220898	8220898	+	18.0912	NA	non-coding (NR_026951, exon 3 of 3)	non-coding (NR_026951, exon 3 of 3)	3145	NR_026951	284029	Hs.121692	NM_173621	ENSG00000178977	LINC00324	C17orf44|NCRNA00324	long intergenic non-protein coding RNA 324	ncRNA
MEIS1_in_B13ko_peak_1128	chr2	197483741	197483741	+	18.0912	NA	Intergenic	LTR10C|LTR|ERV1	3162	NR_132787	106635539		NR_132787		SNORA105A	-	small nucleolar RNA, H/ACA box 105A	snoRNA
MEIS1_in_B13ko_peak_425	chr11	83367985	83367985	+	18.046	NA	Intergenic	LTR10G|LTR|ERV1	-81578	NM_001286116	60492	Hs.368866	NM_021825	ENSG00000137500	CCDC90B	MDS011|MDS025	coiled-coil domain containing 90B	protein-coding
MEIS1_in_B13ko_peak_185	chr1	161422141	161422141	+	17.8975	NA	Intergenic	tRNA-Glu-GAA|tRNA|tRNA	-54258	NM_001013625	257177	Hs.534593	NM_001013625	ENSG00000188931	CFAP126	C1orf192|Flattop|Fltp	cilia and flagella associated protein 126	protein-coding
MEIS1_in_B13ko_peak_613	chr13	18195344	18195344	+	17.8689	NA	promoter-TSS (NR_027278)	promoter-TSS (NR_027278)	47	NR_027278	26080	Hs.448583	NR_027278	ENSG00000279516	FAM230C	LINC00281|NCRNA00281	family with sequence similarity 230 member C	ncRNA
MEIS1_in_B13ko_peak_441	chr11	134762476	134762476	+	17.8479	NA	Intergenic	CpG	-222876	NR_135050	100507548	Hs.639995	NR_135050		LOC100507548	-	uncharacterized LOC100507548	ncRNA
MEIS1_in_B13ko_peak_409	chr11	66421782	66421782	+	17.8479	NA	intron (NM_178864, intron 1 of 7)	CpG	778	NM_001318804	266743	Hs.256036	NM_178864	ENSG00000174576	NPAS4	Le-PAS|NXF|PASD10|bHLHe79	neuronal PAS domain protein 4	protein-coding
MEIS1_in_B13ko_peak_1803	chr7	96508563	96508563	+	17.7576	NA	Intergenic	Intergenic	-5040	NM_001201451	7979	Hs.489201	NM_006304	ENSG00000127922	SEM1	C7orf76|DSS1|ECD|SHFD1|SHFM1|SHSF1|Shfdg1	SEM1, 26S proteasome complex subunit	protein-coding
MEIS1_in_B13ko_peak_1968	chr9	92984208	92984208	+	17.7576	NA	intron (NM_001083536, intron 3 of 17)	MER50-int|LTR|ERV1	9772	NM_033086	89846	Hs.411081	NM_033086	ENSG00000127084	FGD3	ZFYVE5	FYVE, RhoGEF and PH domain containing 3	protein-coding
MEIS1_in_B13ko_peak_408	chr11	65833795	65833795	+	17.7576	NA	promoter-TSS (NM_152760)	promoter-TSS (NM_152760)	-144	NM_152760	254122	Hs.591950	NM_152760	ENSG00000172803	SNX32	SNX6B	sorting nexin 32	protein-coding
MEIS1_in_B13ko_peak_1497	chr4	116357948	116357948	+	17.7576	NA	Intergenic	LTR18A|LTR|ERVL	58223	NR_031737	100302290		NR_031737	ENSG00000284253	MIR1973	hsa-mir-1973|mir-1973	microRNA 1973	ncRNA
MEIS1_in_B13ko_peak_990	chr19	9673995	9673995	+	17.6663	NA	intron (NM_017656, intron 1 of 3)	LTR10F|LTR|ERV1	1105	NM_001130032	54811	Hs.371107	NM_017656	ENSG00000171466	ZNF562	-	zinc finger protein 562	protein-coding
MEIS1_in_B13ko_peak_581	chr12	120336587	120336587	+	17.6663	NA	Intergenic	THE1B-int|LTR|ERVL-MaLR	-8798	NM_000928	5319	Hs.992	NM_000928	ENSG00000170890	PLA2G1B	PLA2|PLA2A|PPLA2	phospholipase A2 group IB	protein-coding
MEIS1_in_B13ko_peak_1647	chr6	27479727	27479727	+	17.6663	NA	Intergenic	tRNA-Asp-GAY|tRNA|tRNA	-6609	NM_001347832	7738	Hs.158174	NM_007149	ENSG00000096654	ZNF184	kr-ZNF3	zinc finger protein 184	protein-coding
MEIS1_in_B13ko_peak_1088	chr2	30218190	30218190	+	17.6663	NA	Intergenic	Intergenic	-13341	NM_030915	81606	Hs.567598	NM_030915	ENSG00000213626	LBH	-	limb bud and heart development	protein-coding
MEIS1_in_B13ko_peak_1430	chr3	193714730	193714730	+	17.6663	NA	Intergenic	MSTA-int|LTR|ERVL-MaLR	-87398	NR_046634	100873941	Hs.679364	NR_046634	ENSG00000224855	OPA1-AS1	-	OPA1 antisense RNA 1	ncRNA
MEIS1_in_B13ko_peak_582	chr12	120430692	120430692	+	17.6663	NA	Intergenic	L2a|LINE|L2	-7398	NM_004373	1337	Hs.369624	NM_004373	ENSG00000111775	COX6A1	CMTRID|COX6A|COX6AL	cytochrome c oxidase subunit 6A1	protein-coding
MEIS1_in_B13ko_peak_83	chr1	121016873	121016873	+	17.6268	NA	intron (NR_135813, intron 2 of 2)	tRNA-Gly-GGG|tRNA|tRNA	35294	NR_135813	101929798	Hs.649642	NR_135813	ENSG00000275585	LOC101929798	CH17-118O6.3	phosphodiesterase 4D interacting protein pseudogene	pseudo
MEIS1_in_B13ko_peak_471	chr12	19439323	19439323	+	17.579	NA	promoter-TSS (NM_001114176)	promoter-TSS (NM_001114176)	-351	NM_001114176	121536	Hs.126497	NM_153207	ENSG00000139154	AEBP2	-	AE binding protein 2	protein-coding
MEIS1_in_B13ko_peak_214	chr1	179882733	179882733	+	17.4325	NA	exon (NM_015602, exon 1 of 10)	exon (NM_015602, exon 1 of 10)	691	NM_015602	26092	Hs.496459	NM_015602	ENSG00000143337	TOR1AIP1	LAP1|LAP1B|LGMD2Y	torsin 1A interacting protein 1	protein-coding
MEIS1_in_B13ko_peak_1132	chr2	212863283	212863283	+	17.4178	NA	Intergenic	L1M3f|LINE|L1	-62974	NR_039935	100616267		NR_039935	ENSG00000266354	MIR4776-1	mir-4776-1	microRNA 4776-1	ncRNA
MEIS1_in_B13ko_peak_611	chr12_GL877875v1_alt	82	82	+	17.3362	NA	Intergenic	(CTAACC)n|Simple_repeat|Simple_repeat	21933	NR_130745	100288778	Hs.459573	NR_130745	ENSG00000226210	LOC100288778	-	WASH complex subunit 1 pseudogene	pseudo
MEIS1_in_B13ko_peak_322	chr1	248906227	248906227	+	17.3362	NA	promoter-TSS (NM_001017434)	promoter-TSS (NM_001017434)	-16	NM_170725	267002	Hs.602037	NM_170725	ENSG00000185220	PGBD2	-	piggyBac transposable element derived 2	protein-coding
MEIS1_in_B13ko_peak_1696	chr6	136832099	136832099	+	17.3352	NA	intron (NM_000288, intron 3 of 9)	THE1D-int|LTR|ERVL-MaLR	9535	NM_000288	5191	Hs.280932	NM_000288	ENSG00000112357	PEX7	PBD9B|PTS2R|RCDP1|RD	peroxisomal biogenesis factor 7	protein-coding
MEIS1_in_B13ko_peak_579	chr12	120293088	120293088	+	17.1718	NA	TTS (NR_003925)	TTS (NR_003925)	149	NR_003925	26835		NR_003925	ENSG00000200795	RNU4-1	RNU4A|RNU4B2|U4|U4BL	RNA, U4 small nuclear 1	snRNA
MEIS1_in_B13ko_peak_1791	chr7	84529659	84529659	+	17.1602	NA	Intergenic	Intergenic	-2817	NR_110080	101927378	Hs.539042	NR_110079	ENSG00000235139	LOC101927378	-	uncharacterized LOC101927378	ncRNA
MEIS1_in_B13ko_peak_123	chr1	148529287	148529287	+	17.149	NA	Intergenic	tRNA-Asn-AAC|tRNA|tRNA	-46002	NM_001123068	644591	Hs.534674	NM_001123068	ENSG00000236334	PPIAL4G	COAS-2	peptidylprolyl isomerase A like 4G	protein-coding
MEIS1_in_B13ko_peak_266	chr1	217134694	217134694	+	17.0927	NA	intron (NM_001134285, intron 1 of 8)	CpG	3061	NM_001134285	2104	Hs.444225	NM_001438	ENSG00000196482	ESRRG	ERR-gamma|ERR3|ERRg|ERRgamma|NR3B3	estrogen related receptor gamma	protein-coding
MEIS1_in_B13ko_peak_79	chr1	120032455	120032455	+	17.0927	NA	intron (NM_024408, intron 1 of 33)	intron (NM_024408, intron 1 of 33)	37248	NM_001200001	4853	Hs.487360	NM_024408	ENSG00000134250	NOTCH2	AGS2|HJCYS|hN2	notch 2	protein-coding
MEIS1_in_B13ko_peak_84	chr1	121020775	121020775	+	17.0927	NA	intron (NR_135813, intron 2 of 2)	tRNA-Val-GTG|tRNA|tRNA	31392	NR_135813	101929798	Hs.649642	NR_135813	ENSG00000275585	LOC101929798	CH17-118O6.3	phosphodiesterase 4D interacting protein pseudogene	pseudo
MEIS1_in_B13ko_peak_1459	chr4	28014855	28014855	+	17.0895	NA	Intergenic	LTR18C|LTR|ERVL	797376	NR_125921	101929199	Hs.570815	NR_125921	ENSG00000249699	LINC02261	-	long intergenic non-protein coding RNA 2261	ncRNA
MEIS1_in_B13ko_peak_715	chr14_KI270846v1_alt	1155772	1155772	+	17.0895	NA	Intergenic	Intergenic	27382	NR_106988
MEIS1_in_B13ko_peak_1700	chr6	140193493	140193493	+	17.0895	NA	Intergenic	MER41-int|LTR|ERV1	-11759	NR_037441	100500879		NR_037441	ENSG00000263514	MIR3668	-	microRNA 3668	ncRNA
MEIS1_in_B13ko_peak_1910	chr8	84752896	84752896	+	17.0895	NA	intron (NM_001287244, intron 1 of 7)	MSTA-int|LTR|ERVL-MaLR	46969	NM_001287244	138046	Hs.121663	NM_173848	ENSG00000184672	RALYL	HNRPCL3	RALY RNA binding protein like	protein-coding
MEIS1_in_B13ko_peak_1603	chr5	181188411	181188411	+	17.0895	NA	Intergenic	Intergenic	3497	NR_108031	102577426	Hs.277359	NR_108031	ENSG00000248473	LINC01962	-	long intergenic non-protein coding RNA 1962	ncRNA
MEIS1_in_B13ko_peak_1994	chr9	135648143	135648143	+	17.0895	NA	Intergenic	LTR10B1|LTR|ERV1	-8603	NM_182974	360203	Hs.522491	NM_182974	ENSG00000204007	GLT6D1	GLTDC1|GT6M7	glycosyltransferase 6 domain containing 1	protein-coding
MEIS1_in_B13ko_peak_460	chr12	7168414	7168414	+	17.0895	NA	Intergenic	MER66-int|LTR|ERV1	-20749	NM_001131026	5830	Hs.567327	NM_000319	ENSG00000139197	PEX5	PBD2A|PBD2B|PTS1-BP|PTS1R|PXR1|RCDP5	peroxisomal biogenesis factor 5	protein-coding
MEIS1_in_B13ko_peak_9	chr1	7791196	7791196	+	17.0895	NA	intron (NM_016831, intron 5 of 21)	THE1C-int|LTR|ERVL-MaLR	6767	NM_001289864	8863	Hs.162200	NM_016831	ENSG00000049246	PER3	FASPS3|GIG13	period circadian regulator 3	protein-coding
MEIS1_in_B13ko_peak_1625	chr6	26313151	26313151	+	17.0895	NA	Intergenic	tRNA-Met-i|tRNA|tRNA	-27652	NM_003543	8365	Hs.591790	NM_003543	ENSG00000158406	HIST1H4H	H4/h|H4FH	histone cluster 1 H4 family member h	protein-coding
MEIS1_in_B13ko_peak_493	chr12	47957856	47957856	+	17.0895	NA	Intergenic	MSTA-int|LTR|ERVL-MaLR	-5691	NM_001143842	79022	Hs.596726	NM_024056	ENSG00000134291	TMEM106C	-	transmembrane protein 106C	protein-coding
MEIS1_in_B13ko_peak_1547	chr5	68549410	68549410	+	17.0895	NA	Intergenic	Intergenic	256842	NM_001242466	5295	Hs.132225	NM_181504	ENSG00000145675	PIK3R1	AGM7|GRB1|IMD36|p85|p85-ALPHA	phosphoinositide-3-kinase regulatory subunit 1	protein-coding
MEIS1_in_B13ko_peak_721	chr15	41230796	41230796	+	17.0895	NA	promoter-TSS (NM_001286441)	promoter-TSS (NM_001286441)	-39	NM_152596	161829	Hs.307999	NM_152596	ENSG00000178997	EXD1	EXDL1	exonuclease 3'-5' domain containing 1	protein-coding
MEIS1_in_B13ko_peak_656	chr14	20610170	20610170	+	17.0895	NA	Intergenic	tRNA-Leu-CTY|tRNA|tRNA	-19347	NM_001024822	493901	Hs.729466	NM_001024822	ENSG00000258436	RNASE12	HEL-S-85p|RAI1	ribonuclease A family member 12 (inactive)	protein-coding
MEIS1_in_B13ko_peak_32	chr1	26621084	26621084	+	17.0895	NA	Intergenic	CpG	66542	NR_031740	100302190		NR_031740	ENSG00000238705	MIR1976	hsa-mir-1976	microRNA 1976	ncRNA
MEIS1_in_B13ko_peak_857	chr17	32135691	32135691	+	17.0895	NA	Intergenic	LTR13|LTR|ERVK	-6763	NM_001288754	55288	Hs.655325	NM_018307	ENSG00000126858	RHOT1	ARHT1|MIRO-1|MIRO1	ras homolog family member T1	protein-coding
MEIS1_in_B13ko_peak_327	chr10	17262697	17262697	+	17.0895	NA	Intergenic	LTR10E|LTR|ERV1	-32712	NR_108061	100507347	Hs.740502	NR_108060	ENSG00000229124	VIM-AS1	-	VIM antisense RNA 1	ncRNA
MEIS1_in_B13ko_peak_1073	chr2	3575173	3575173	+	17.0895	NA	promoter-TSS (NM_001011)	promoter-TSS (NM_001011)	-90	NM_001011	6201	Hs.534346	NM_001011	ENSG00000171863	RPS7	DBA8|S7|eS7	ribosomal protein S7	protein-coding
MEIS1_in_B13ko_peak_445	chr12	698428	698428	+	17.0895	NA	Intergenic	LTR10C|LTR|ERV1	-34687	NM_016533	4815	Hs.655804	NM_016533	ENSG00000171840	NINJ2	-	ninjurin 2	protein-coding
MEIS1_in_B13ko_peak_2037	chrUn_KI270744v1	141251	141251	+	17.0895	NA	NA	Intergenic	NA	NA
MEIS1_in_B13ko_peak_669	chr14	31330135	31330135	+	17.0895	NA	intron (NM_015473, intron 22 of 35)	THE1C-int|LTR|ERVL-MaLR	90447	NM_015473	25938	Hs.744979	NM_015473	ENSG00000129493	HEATR5A	C14orf125	HEAT repeat containing 5A	protein-coding
MEIS1_in_B13ko_peak_420	chr11	76048992	76048992	+	17.0895	NA	intron (NM_003369, intron 12 of 14)	LTR18C|LTR|ERVL	157538	NM_004626	7481	Hs.108219	NM_004626	ENSG00000085741	WNT11	HWNT11	Wnt family member 11	protein-coding
MEIS1_in_B13ko_peak_1100	chr2	71548777	71548777	+	17.0878	NA	intron (NM_001130981, intron 17 of 55)	intron (NM_001130981, intron 17 of 55)	82075	NM_001130987	8291	Hs.252180	NM_003494	ENSG00000135636	DYSF	FER1L1|LGMD2B|MMD1	dysferlin	protein-coding
MEIS1_in_B13ko_peak_1987	chr9	129436993	129436993	+	17.0878	NA	Intergenic	(GCGTGT)n|Simple_repeat|Simple_repeat	-51667	NR_038955	100506190	Hs.529860	NR_038955		LINC00963	MetaLnc9	long intergenic non-protein coding RNA 963	ncRNA
MEIS1_in_B13ko_peak_187	chr1	161443326	161443326	+	17.0763	NA	Intergenic	CpG	-62089	NM_021642	2212	Hs.352642	NM_021642	ENSG00000143226	FCGR2A	CD32|CD32A|CDw32|FCG2|FCGR2|FCGR2A1|FcGR|IGFR2	Fc fragment of IgG receptor IIa	protein-coding
MEIS1_in_B13ko_peak_138	chr1	149860932	149860932	+	17.0271	NA	exon (NM_003548, exon 1 of 1).2	exon (NM_003548, exon 1 of 1).2	227	NM_003548	8370	Hs.55468	NM_003548	ENSG00000270882	HIST2H4A	FO108|H4|H4/n|H4F2|H4FN|HIST2H4	histone cluster 2 H4 family member a	protein-coding
MEIS1_in_B13ko_peak_132	chr1	149832728	149832728	+	16.905	NA	promoter-TSS (NM_003548)	promoter-TSS (NM_003548)	71	NM_001034077	554313	Hs.55468	NM_001034077	ENSG00000270276	HIST2H4B	H4/o	histone cluster 2 H4 family member b	protein-coding
MEIS1_in_B13ko_peak_245	chr1	202205431	202205431	+	16.8741	NA	intron (NM_021636, intron 1 of 17)	(CA)n|Simple_repeat|Simple_repeat	1654	NM_021636	59352	Hs.497402	NM_021636	ENSG00000133067	LGR6	GPCR|VTS20631	leucine rich repeat containing G protein-coupled receptor 6	protein-coding
MEIS1_in_B13ko_peak_338	chr10	58086359	58086359	+	16.8741	NA	Intergenic	Intergenic	181575	NM_152230	253430	Hs.30280	NM_152230	ENSG00000151151	IPMK	-	inositol polyphosphate multikinase	protein-coding
MEIS1_in_B13ko_peak_1724	chr7	1357212	1357212	+	16.8442	NA	Intergenic	Intergenic	102261	NM_182924	79778	Hs.376617	NM_024723	ENSG00000164877	MICALL2	JRAB|MICAL-L2	MICAL like 2	protein-coding
MEIS1_in_B13ko_peak_1141	chr2	233566782	233566782	+	16.8442	NA	Intergenic	CpG	-1192	NM_018218	55230	Hs.96513	NM_018218	ENSG00000085982	USP40	-	ubiquitin specific peptidase 40	protein-coding
MEIS1_in_B13ko_peak_1679	chr6	91886371	91886371	+	16.7979	NA	Intergenic	THE1B-int|LTR|ERVL-MaLR	-195943	NR_104154	101929083	Hs.586238	NR_104154		CASC6	-	cancer susceptibility 6 (non-protein coding)	ncRNA
MEIS1_in_B13ko_peak_1333	chr3	78390400	78390400	+	16.7324	NA	Intergenic	THE1C-int|LTR|ERVL-MaLR	629059	NM_133631	6091	Hs.744218	NM_002941	ENSG00000169855	ROBO1	DUTT1|SAX3	roundabout guidance receptor 1	protein-coding
MEIS1_in_B13ko_peak_621	chr13	41148888	41148888	+	16.6789	NA	intron (NR_120423, intron 2 of 3)	LTR76|LTR|ERV1	15960	NR_120423	101929140	Hs.663088	NR_120423	ENSG00000278390	LOC101929140	-	uncharacterized LOC101929140	ncRNA
MEIS1_in_B13ko_peak_1006	chr19	21335905	21335905	+	16.6789	NA	Intergenic	LTR10E|LTR|ERV1	-6466	NM_001297560	7562	Hs.466296	NM_021269	ENSG00000182141	ZNF708	KOX8|ZNF15|ZNF15L1	zinc finger protein 708	protein-coding
MEIS1_in_B13ko_peak_1381	chr3	138768305	138768305	+	16.6668	NA	Intergenic	MER52A|LTR|ERV1	-8946	NM_006219	5291	Hs.239818	NM_006219	ENSG00000051382	PIK3CB	P110BETA|PI3K|PI3KBETA|PIK3C1	phosphatidylinositol-4,5-bisphosphate 3-kinase catalytic subunit beta	protein-coding
MEIS1_in_B13ko_peak_1438	chr3	196549514	196549514	+	16.6022	NA	Intergenic	THE1B-int|LTR|ERVL-MaLR	19160	NM_001345909	348793	Hs.385865	NM_182627	ENSG00000185798	WDR53	-	WD repeat domain 53	protein-coding
MEIS1_in_B13ko_peak_941	chr18	43486667	43486667	+	16.5211	NA	Intergenic	LTR18B|LTR|ERVL	-209017	NM_020783	6860	Hs.8059	NM_020783	ENSG00000132872	SYT4	HsT1192	synaptotagmin 4	protein-coding
MEIS1_in_B13ko_peak_1406	chr3	161119155	161119155	+	16.4918	NA	Intergenic	THE1D-int|LTR|ERVL-MaLR	-13783	NM_033168	8706	Hs.418062	NM_003781	ENSG00000169255	B3GALNT1	B3GALT3|GLCT3|GLOB|Gb4Cer|P|P1|beta3Gal-T3|galT3	beta-1,3-N-acetylgalactosaminyltransferase 1 (globoside blood group)	protein-coding
MEIS1_in_B13ko_peak_470	chr12	16014594	16014594	+	16.4575	NA	intron (NM_015954, intron 6 of 8)	THE1D-int|LTR|ERVL-MaLR	103422	NM_001300779	51071	Hs.39429	NM_015954	ENSG00000023697	DERA	CGI-26|DEOC	deoxyribose-phosphate aldolase	protein-coding
MEIS1_in_B13ko_peak_1465	chr4	40191645	40191645	+	16.4403	NA	intron (NM_001278368, intron 1 of 2)	intron (NM_001278368, intron 1 of 2)	634	NM_001278368	399	Hs.654594	NM_004310	ENSG00000168421	RHOH	ARHH|TTF	ras homolog family member H	protein-coding
MEIS1_in_B13ko_peak_104	chr1	145465645	145465645	+	16.3839	NA	Intergenic	U1|snRNA|snRNA	-59867	NM_001278267	100288142	Hs.445080	NM_001278267	ENSG00000162825	NBPF20	-	NBPF member 20	protein-coding
MEIS1_in_B13ko_peak_1234	chr21	43262645	43262645	+	16.2975	NA	Intergenic	Intergenic	69394	NR_103713	100126693	Hs.473952	NR_103713		LINC00322	C21orf136|NCRNA00322	long intergenic non-protein coding RNA 322	ncRNA
MEIS1_in_B13ko_peak_560	chr12	104235106	104235106	+	16.287	NA	intron (NM_001093771, intron 1 of 16)	LTR10B1|LTR|ERV1	19327	NM_001093771	7296	Hs.654922	NM_003330	ENSG00000198431	TXNRD1	GRIM-12|TR|TR1|TRXR1|TXNR	thioredoxin reductase 1	protein-coding
MEIS1_in_B13ko_peak_1844	chr7	127620344	127620344	+	16.2026	NA	Intergenic	Intergenic	-4618	NM_006193	5078	Hs.129706	NM_006193	ENSG00000106331	PAX4	KPD|MODY9	paired box 4	protein-coding
MEIS1_in_B13ko_peak_66	chr1	86377525	86377525	+	16.1909	NA	intron (NM_020729, intron 7 of 17)	THE1D-int|LTR|ERVL-MaLR	18817	NM_001007022	57489	Hs.149360	NM_020729	ENSG00000122417	ODF2L	dJ977L11.1	outer dense fiber of sperm tails 2 like	protein-coding
MEIS1_in_B13ko_peak_508	chr12	54033686	54033686	+	16.1895	NA	promoter-TSS (NR_030753)	promoter-TSS (NR_030753)	-264	NR_030753	693200		NR_030753	ENSG00000207571	MIR615	MIRN615|hsa-mir-615|mir-615	microRNA 615	ncRNA
MEIS1_in_B13ko_peak_143	chr1	149899541	149899541	+	16.1251	NA	promoter-TSS (NM_016074)	promoter-TSS (NM_016074)	-41	NM_001321026	51027	Hs.13880	NM_016074	ENSG00000178096	BOLA1	CGI-143	bolA family member 1	protein-coding
MEIS1_in_B13ko_peak_1316	chr3	31606646	31606646	+	16.1171	NA	intron (NM_178862, intron 5 of 15)	THE1B-int|LTR|ERVL-MaLR	74145	NM_178862	201595	Hs.475812	NM_178862	ENSG00000163527	STT3B	CDG1X|SIMP|STT3-B	STT3B, catalytic subunit of the oligosaccharyltransferase complex	protein-coding
MEIS1_in_B13ko_peak_1408	chr3	169668624	169668624	+	16.1171	NA	Intergenic	CpG	-4849	NM_004991	2122	Hs.744090	NM_004991	ENSG00000085276	MECOM	AML1-EVI-1|EVI1|KMT8E|MDS1|MDS1-EVI1|PRDM3|RUSAT2	MDS1 and EVI1 complex locus	protein-coding
MEIS1_in_B13ko_peak_1583	chr5	168058105	168058105	+	16.1014	NA	intron (NM_001122679, intron 6 of 28)	LTR18A|LTR|ERVL	174267	NR_109894	101927862	Hs.659376	NR_109894	ENSG00000253978	CTB-178M22.2	-	uncharacterized LOC101927862	ncRNA
MEIS1_in_B13ko_peak_48	chr1	38012510	38012510	+	16.1014	NA	promoter-TSS (NM_016037)	promoter-TSS (NM_016037)	-202	NM_016037	51118	Hs.472038	NM_016037	ENSG00000183520	UTP11	CGI-94|CGI94|UTP11L	UTP11, small subunit processome component	protein-coding
MEIS1_in_B13ko_peak_769	chr16	3150681	3150681	+	16.1014	NA	TTS (NR_132322)	TTS (NR_132322)	6390	NR_132322	197350	Hs.434132	NR_132322	ENSG00000228146	CASP16P	CASP16	caspase 16, pseudogene	pseudo
MEIS1_in_B13ko_peak_1084	chr2	27051264	27051264	+	16.1014	NA	promoter-TSS (NR_046730)	promoter-TSS (NR_046730)	-159	NR_138023	60509	Hs.138207	NM_021831	ENSG00000084693	AGBL5	CCP5|RP75	ATP/GTP binding protein like 5	protein-coding
MEIS1_in_B13ko_peak_414	chr11	68460198	68460198	+	16.1014	NA	promoter-TSS (NM_001164160)	promoter-TSS (NM_001164160)	-520	NM_001164161	55291	Hs.503022	NM_018312	ENSG00000110075	PPP6R3	C11orf23|PP6R3|SAP190|SAPL|SAPLa|SAPS3	protein phosphatase 6 regulatory subunit 3	protein-coding
MEIS1_in_B13ko_peak_747	chr15	84187891	84187891	+	16.1014	NA	Intergenic	MamGypLTR3|LTR|Gypsy	-3957	NR_033738	440300	Hs.546565	NR_033738		LOC440300	-	chondroitin sulfate proteoglycan 4 pseudogene	pseudo
MEIS1_in_B13ko_peak_1322	chr3	38433036	38433036	+	16.1014	NA	Intergenic	THE1C-int|LTR|ERVL-MaLR	-21263	NM_001106	93	Hs.174273	NM_001106	ENSG00000114739	ACVR2B	ACTRIIB|ActR-IIB|HTX4	activin A receptor type 2B	protein-coding
MEIS1_in_B13ko_peak_774	chr16	3305289	3305289	+	16.1014	NA	promoter-TSS (NM_001302109)	promoter-TSS (NM_001302109)	-117	NM_001302109	7627	Hs.513292	NM_153028	ENSG00000162086	ZNF75A	-	zinc finger protein 75a	protein-coding
MEIS1_in_B13ko_peak_1917	chr8	103271524	103271524	+	16.1014	NA	Intergenic	MSTA-int|LTR|ERVL-MaLR	-26909	NM_001164615	8323	Hs.591863	NM_003506	ENSG00000164930	FZD6	FZ-6|FZ6|HFZ6|NDNC10	frizzled class receptor 6	protein-coding
MEIS1_in_B13ko_peak_1941	chr9	30198078	30198078	+	16.1014	NA	Intergenic	LTR18B|LTR|ERVL	210376	NR_046204	401497	Hs.680131	NR_046204		LINC01242	-	long intergenic non-protein coding RNA 1242	ncRNA
MEIS1_in_B13ko_peak_1627	chr6	26327617	26327617	+	16.1014	NA	Intergenic	tRNA-Ser-TCY|tRNA|tRNA	-37542	NM_007047	11118	Hs.376046	NM_007047	ENSG00000186470	BTN3A2	BT3.2|BTF4|BTN3.2|CD277	butyrophilin subfamily 3 member A2	protein-coding
MEIS1_in_B13ko_peak_688	chr14	68101883	68101883	+	16.0169	NA	intron (NM_002877, intron 7 of 10)	THE1C-int|LTR|ERVL-MaLR	278291	NM_001321815	5890	Hs.172587	NM_002877	ENSG00000182185	RAD51B	R51H2|RAD51L1|REC2	RAD51 paralog B	protein-coding
MEIS1_in_B13ko_peak_462	chr12	9911002	9911002	+	15.9822	NA	intron (NM_207375, intron 4 of 4)	LTR10B2|LTR|ERV1	21379	NM_207375	387836	Hs.527665	NM_207375	ENSG00000188393	CLEC2A	INPE5792|KACL|PILAR|UNQ5792	C-type lectin domain family 2 member A	protein-coding
MEIS1_in_B13ko_peak_1746	chr7	32802420	32802420	+	15.9822	NA	Intergenic	THE1D-int|LTR|ERVL-MaLR	-23882	NR_132360	102724668	Hs.636806	NR_132360		DPY19L1P2	THC1072510	DPY19L1 pseudogene 2	pseudo
MEIS1_in_B13ko_peak_1793	chr7	86733958	86733958	+	15.9414	NA	intron (NM_000840, intron 1 of 5)	LTR18A|LTR|ERVL	90044	NM_000840	2913	Hs.590575	NM_000840	ENSG00000198822	GRM3	GLUR3|GPRC1C|MGLUR3|mGlu3	glutamate metabotropic receptor 3	protein-coding
MEIS1_in_B13ko_peak_1678	chr6	83867766	83867766	+	15.9312	NA	intron (NM_016230, intron 2 of 15)	LTR18A|LTR|ERVL	8115	NM_016230	51167	Hs.5741	NM_016230	ENSG00000065615	CYB5R4	NCB5OR|cb5/cb5R|dJ676J13.1	cytochrome b5 reductase 4	protein-coding
MEIS1_in_B13ko_peak_1900	chr8	57777832	57777832	+	15.9312	NA	Intergenic	THE1D-int|LTR|ERVL-MaLR	31683	NR_134276	286178	Hs.255156	NR_134276	ENSG00000254139	LOC286178	-	uncharacterized LOC286178	ncRNA
MEIS1_in_B13ko_peak_383	chr11	34654994	34654994	+	15.9073	NA	intron (NM_012153, intron 6 of 8)	intron (NM_012153, intron 6 of 8)	22530	NM_001206616	26298	Hs.653859	NM_012153	ENSG00000135373	EHF	ESE3|ESE3B|ESEJ	ETS homologous factor	protein-coding
MEIS1_in_B13ko_peak_561	chr12	105310592	105310592	+	15.9073	NA	intron (NR_131986, intron 1 of 2)	HERVK11-int|LTR|ERVK	16425	NR_131986	105369954	Hs.368938	NR_131986	ENSG00000257642	KCCAT198	-	renal clear cell carcinoma-associated transcript 198	ncRNA
MEIS1_in_B13ko_peak_1248	chr22	17037243	17037243	+	15.9038	NA	non-coding (NR_015352, exon 1 of 4)	non-coding (NR_015352, exon 1 of 4)	673	NR_015352	100130418	Hs.660640	NR_015352		CECR7	CYCL|SAHL1	cat eye syndrome chromosome region, candidate 7 (non-protein coding)	ncRNA
MEIS1_in_B13ko_peak_1405	chr3	160449942	160449942	+	15.8695	NA	promoter-TSS (NM_173084)	promoter-TSS (NM_173084)	-104	NM_173084	286827	Hs.212957	NM_173084	ENSG00000213186	TRIM59	IFT80L|MRF1|RNF104|TRIM57|TSBF1	tripartite motif containing 59	protein-coding
MEIS1_in_B13ko_peak_137	chr1	149852786	149852786	+	15.6992	NA	exon (NM_001005464, exon 1 of 1).2	exon (NM_001005464, exon 1 of 1).2	167	NM_021059	126961	Hs.647745	NM_021059	ENSG00000203811	HIST2H3C	H3|H3.2|H3/M|H3F2|H3FM|H3FN	histone cluster 2 H3 family member c	protein-coding
MEIS1_in_B13ko_peak_431	chr11	106167275	106167275	+	15.6956	NA	Intergenic	LTR8B|LTR|ERV1	-35159	NR_135099	105369473	Hs.524010	NR_135099	ENSG00000254580	LOC105369473	-	uncharacterized LOC105369473	ncRNA
MEIS1_in_B13ko_peak_128	chr1	149636821	149636821	+	15.6956	NA	intron (NR_111950, intron 1 of 8)	U1|snRNA|snRNA	29809	NR_111952	57234	Hs.456578	NR_046135	ENSG00000277147	LINC00869	FAM91A2	long intergenic non-protein coding RNA 869	ncRNA
MEIS1_in_B13ko_peak_258	chr1	206924321	206924321	+	15.6956	NA	Intergenic	(GT)n|Simple_repeat|Simple_repeat	-2288	NM_005449	9214	Hs.58831	NM_005449	ENSG00000162894	FCMR	FAIM3|TOSO	Fc fragment of IgM receptor	protein-coding
MEIS1_in_B13ko_peak_1494	chr4	107780857	107780857	+	15.6828	NA	Intergenic	LTR18C|LTR|ERVL	-43708	NM_001136258	166929	Hs.595423	NM_152621	ENSG00000164023	SGMS2	SMS2	sphingomyelin synthase 2	protein-coding
MEIS1_in_B13ko_peak_2005	chrUn_GL000214v1	65116	65116	+	15.6765	NA	NA	Intergenic	NA	NA
MEIS1_in_B13ko_peak_1620	chr6	19455141	19455141	+	15.6739	NA	intron (NR_134615, intron 1 of 1)	intron (NR_134615, intron 1 of 1)	5320	NR_134615	105374960	Hs.519913	NR_134615		LOC105374960	-	uncharacterized LOC105374960	ncRNA
MEIS1_in_B13ko_peak_1709	chr6	160983572	160983572	+	15.6205	NA	Intergenic	MSTA-int|LTR|ERVL-MaLR	-8155	NM_005922	4216	Hs.390428	NM_005922	ENSG00000085511	MAP3K4	MAPKKK4|MEKK 4|MEKK4|MTK1|PRO0412	mitogen-activated protein kinase kinase kinase 4	protein-coding
MEIS1_in_B13ko_peak_957	chr18	72305470	72305470	+	15.6205	NA	Intergenic	Intergenic	239018	NM_182511	147381	Hs.569851	NM_182511	ENSG00000141668	CBLN2	-	cerebellin 2 precursor	protein-coding
MEIS1_in_B13ko_peak_186	chr1	161428109	161428109	+	15.6065	NA	Intergenic	tRNA-Asn-AAC|tRNA|tRNA	-60226	NM_001013625	257177	Hs.534593	NM_001013625	ENSG00000188931	CFAP126	C1orf192|Flattop|Fltp	cilia and flagella associated protein 126	protein-coding
MEIS1_in_B13ko_peak_384	chr11	34668340	34668340	+	15.5876	NA	Intergenic	Intergenic	35876	NM_001206616	26298	Hs.653859	NM_012153	ENSG00000135373	EHF	ESE3|ESE3B|ESEJ	ETS homologous factor	protein-coding
MEIS1_in_B13ko_peak_1378	chr3	133792364	133792364	+	15.5876	NA	intron (NM_021203, intron 1 of 7)	MER51-int|LTR|ERV1	8331	NM_021203	58477	Hs.12152	NM_021203	ENSG00000144867	SRPRB	APMCF1	SRP receptor subunit beta	protein-coding
MEIS1_in_B13ko_peak_805	chr16	75122111	75122111	+	15.5818	NA	Intergenic	LTR10A|LTR|ERV1	-5339	NM_194436	197257	Hs.380929	NM_153486	ENSG00000166816	LDHD	DLD	lactate dehydrogenase D	protein-coding
MEIS1_in_B13ko_peak_212	chr1	171827178	171827178	+	15.5818	NA	Intergenic	THE1D-int|LTR|ERVL-MaLR	-14300	NM_001278252	26052	Hs.654775	NM_015569	ENSG00000197959	DNM3	Dyna III	dynamin 3	protein-coding
MEIS1_in_B13ko_peak_231	chr1	189269202	189269202	+	15.5147	NA	Intergenic	LTR25-int|LTR|ERV1	1206808	NM_001317188	339479	Hs.65765	NM_199051	ENSG00000162670	BRINP3	DBCCR1L|DBCCR1L1|FAM5C	BMP/retinoic acid inducible neural specific 3	protein-coding
MEIS1_in_B13ko_peak_1956	chr9	41616214	41616214	+	15.4818	NA	Intergenic	LTR76|LTR|ERV1	-31460	NR_103714	100289124	Hs.567050	NM_001024608		FAM27E2	FAM27E1	family with sequence similarity 27 member E2	ncRNA
MEIS1_in_B13ko_peak_114	chr1	146410050	146410050	+	15.4818	NA	Intergenic	U1|snRNA|snRNA	33243	NR_004430	26871		NR_004430	ENSG00000206652	RNU1-1	HSD1|HU1-1|RNU1|RNU1A|RNU1A3|RNU1G4|Rnu1a1|U1|U1A1	RNA, U1 small nuclear 1	snRNA
MEIS1_in_B13ko_peak_929	chr18	10141	10141	+	15.4818	NA	Intergenic	(CCCTAA)n|Simple_repeat|Simple_repeat	-1934	NR_110795	102723376	Hs.606852	NR_110795		LOC102723376	-	uncharacterized LOC102723376	ncRNA
MEIS1_in_B13ko_peak_1837	chr7	120951166	120951166	+	15.4231	NA	exon (NM_198267, exon 2 of 5)	exon (NM_198267, exon 2 of 5)	403	NM_198267	54556	Hs.489811	NM_019071	ENSG00000071243	ING3	Eaf4|ING2|MEAF4|p47ING3	inhibitor of growth family member 3	protein-coding
MEIS1_in_B13ko_peak_1417	chr3	179451531	179451531	+	15.4194	NA	promoter-TSS (NM_021629)	promoter-TSS (NM_021629)	52	NM_021629	59345	Hs.173030	NM_021629	ENSG00000114450	GNB4	CMTD1F	G protein subunit beta 4	protein-coding
MEIS1_in_B13ko_peak_237	chr1	196738901	196738901	+	15.3943	NA	intron (NM_000186, intron 17 of 21)	THE1C-int|LTR|ERVL-MaLR	-35899	NM_021023	10878	Hs.709217	NM_021023	ENSG00000116785	CFHR3	CFHL3|DOWN16|FHR-3|FHR3|HLF4	complement factor H related 3	protein-coding
MEIS1_in_B13ko_peak_346	chr10	75405389	75405389	+	15.1777	NA	intron (NR_110302, intron 1 of 1)	CpG-3054	1224	NR_110302	100131213	Hs.534598	NR_024421	ENSG00000237149	ZNF503-AS2	C10orf41|NCRNA00245	ZNF503 antisense RNA 2	ncRNA
MEIS1_in_B13ko_peak_442	chr12	10082	10082	+	15.1777	NA	Intergenic	(CTAACC)n|Simple_repeat|Simple_repeat	21933	NR_130745	100288778	Hs.459573	NR_130745	ENSG00000226210	LOC100288778	-	WASH complex subunit 1 pseudogene	pseudo
MEIS1_in_B13ko_peak_1789	chr7	83267331	83267331	+	15.1777	NA	Intergenic	Intergenic	-104450	NM_033026	27445	Hs.12376	NM_014510	ENSG00000186472	PCLO	ACZ|PCH3	piccolo presynaptic cytomatrix protein	protein-coding
MEIS1_in_B13ko_peak_1439	chr3	196756935	196756935	+	15.1715	NA	intron (NM_002577, intron 1 of 14)	LTR10A|LTR|ERV1	17078	NM_002577	5062	Hs.518530	NM_002577	ENSG00000180370	PAK2	PAK65|PAKgamma	p21 (RAC1) activated kinase 2	protein-coding
MEIS1_in_B13ko_peak_1040	chr19	49266588	49266588	+	15.1136	NA	Intergenic	LTR13|LTR|ERVK	42280	NR_036209	100422979		NR_036209	ENSG00000265407	MIR4324	mir-4324	microRNA 4324	ncRNA
MEIS1_in_B13ko_peak_749	chr15	84485652	84485652	+	15.1136	NA	intron (NM_001267536, intron 9 of 10)	MamGypLTR3|LTR|Gypsy	12777	NR_049748	642423	Hs.681665	NR_049748		LOC642423	-	golgin A2 pseudogene	pseudo
MEIS1_in_B13ko_peak_985	chr19	6425606	6425606	+	15.1136	NA	promoter-TSS (NM_003685)	promoter-TSS (NM_003685)	-795	NM_003685	8570	Hs.727344	NM_003685	ENSG00000088247	KHSRP	FBP2|FUBP2|KSRP	KH-type splicing regulatory protein	protein-coding
MEIS1_in_B13ko_peak_1659	chr6	27902541	27902541	+	15.1136	NA	Intergenic	tRNA-Met-i|tRNA|tRNA	9116	NM_003527	8348	Hs.484991	NM_003527	ENSG00000274641	HIST1H2BO	H2B.2|H2B/n|H2BFN|dJ193B12.2	histone cluster 1 H2B family member o	protein-coding
MEIS1_in_B13ko_peak_1641	chr6	27213858	27213858	+	15.1136	NA	Intergenic	tRNA-Arg-CGY_|tRNA|tRNA	-33865	NM_005865	10279	Hs.274407	NM_005865	ENSG00000112812	PRSS16	TSSP	serine protease 16	protein-coding
MEIS1_in_B13ko_peak_1682	chr6	99026379	99026379	+	15.1136	NA	Intergenic	LTR18A|LTR|ERVL	-78373	NR_103836	26235	Hs.536850	NM_012160	ENSG00000112234	FBXL4	FBL4|FBL5|MTDPS13	F-box and leucine rich repeat protein 4	protein-coding
MEIS1_in_B13ko_peak_1585	chr5	171388538	171388538	+	15.1136	NA	intron (NM_199185, intron 1 of 9)	CpG	834	NM_199185	4869	Hs.557550	NM_002520	ENSG00000181163	NPM1	B23|NPM	nucleophosmin 1	protein-coding
MEIS1_in_B13ko_peak_2040	chrX	11665311	11665311	+	15.1136	NA	non-coding (NR_109776, exon 1 of 15)	non-coding (NR_109776, exon 1 of 15)	390	NM_013427	395	Hs.435291	NM_001174	ENSG00000047648	ARHGAP6	RHOGAP6|RHOGAPX-1	Rho GTPase activating protein 6	protein-coding
MEIS1_in_B13ko_peak_1482	chr4	83965333	83965333	+	15.1136	NA	Intergenic	LTR18A|LTR|ERVL	333836	NR_125909	101928978	Hs.647977	NR_125909	ENSG00000250546	LOC101928978	-	uncharacterized LOC101928978	ncRNA
MEIS1_in_B13ko_peak_1107	chr2	86661539	86661539	+	15.1136	NA	intron (NM_001198954, intron 2 of 7)	LTR18C|LTR|ERVL	-37662	NM_001198951	7844	Hs.469199	NM_005667	ENSG00000239305	RNF103	HKF-1|KF-1|KF1|ZFP-103|ZFP103	ring finger protein 103	protein-coding
MEIS1_in_B13ko_peak_1857	chr7	146504059	146504059	+	15.1136	NA	intron (NM_014141, intron 1 of 23)	LTR18A|LTR|ERVL	387698	NM_014141	26047	Hs.655684	NM_014141	ENSG00000174469	CNTNAP2	AUTS15|CASPR2|CDFE|NRXN4|PTHSL1	contactin associated protein like 2	protein-coding
MEIS1_in_B13ko_peak_1564	chr5	114092614	114092614	+	15.1136	NA	Intergenic	THE1D-int|LTR|ERVL-MaLR	-269705	NM_001278204	3781	Hs.98280	NM_021614	ENSG00000080709	KCNN2	KCa2.2|SK2|SKCA2|SKCa 2|hSK2	potassium calcium-activated channel subfamily N member 2	protein-coding
MEIS1_in_B13ko_peak_1066	chr1_KI270765v1_alt	35220	35220	+	15.1136	NA	Intergenic	U1|snRNA|snRNA	-68940	NM_001164261	645142	Hs.730589	NM_001164261	ENSG00000256374	PPIAL4D	-	peptidylprolyl isomerase A like 4D	protein-coding
MEIS1_in_B13ko_peak_1950	chr9	37120119	37120119	+	15.1136	NA	promoter-TSS (NM_001289119)	promoter-TSS (NM_001289119)	-353	NM_032226	84186	Hs.654700	NM_032226	ENSG00000147905	ZCCHC7	AIR1|HSPC086	zinc finger CCHC-type containing 7	protein-coding
MEIS1_in_B13ko_peak_1005	chr19	18203566	18203566	+	15.1136	NA	intron (NM_002866, intron 1 of 4)	CpG	498	NM_002866	5864	Hs.27744	NM_002866	ENSG00000105649	RAB3A	-	RAB3A, member RAS oncogene family	protein-coding
MEIS1_in_B13ko_peak_10	chr1	8412619	8412619	+	15.1136	NA	intron (NM_012102, intron 13 of 23)	intron (NM_012102, intron 13 of 23)	11068	NM_001042682	473	Hs.463041	NM_012102	ENSG00000142599	RERE	ARG|ARP|ATN1L|DNB1|NEDBEH	arginine-glutamic acid dipeptide repeats	protein-coding
MEIS1_in_B13ko_peak_227	chr1	185027448	185027448	+	15.0686	NA	Intergenic	MSTA-int|LTR|ERVL-MaLR	-17971	NM_007212	6045	Hs.591490	NM_007212	ENSG00000121481	RNF2	BAP-1|BAP1|DING|HIPI3|RING1B|RING2	ring finger protein 2	protein-coding
MEIS1_in_B13ko_peak_1363	chr3	127304351	127304351	+	15.0479	NA	Intergenic	Intergenic	86319	NR_110147	101927123	Hs.526761	NR_110147	ENSG00000244215	LINC02016	-	long intergenic non-protein coding RNA 2016	ncRNA
MEIS1_in_B13ko_peak_1414	chr3	177006201	177006201	+	15.0363	NA	Intergenic	MSTB-int|LTR|ERVL-MaLR	-189200	NR_110819	101928684	Hs.639352	NR_110819	ENSG00000228308	LINC01209	-	long intergenic non-protein coding RNA 1209	ncRNA
MEIS1_in_B13ko_peak_1636	chr6	26553525	26553525	+	15.0363	NA	Intergenic	tRNA-Ala-GCG|tRNA|tRNA	15181	NM_006353	10473	Hs.236774	NM_006353	ENSG00000182952	HMGN4	HMG17L3|NHC	high mobility group nucleosomal binding domain 4	protein-coding
MEIS1_in_B13ko_peak_553	chr12	96036069	96036069	+	14.9788	NA	promoter-TSS (NM_000895)	promoter-TSS (NM_000895)	-408	NM_000895	4048	Hs.524648	NM_000895	ENSG00000111144	LTA4H	-	leukotriene A4 hydrolase	protein-coding
MEIS1_in_B13ko_peak_119	chr1	148263673	148263673	+	14.9088	NA	Intergenic	Intergenic	-16602	NR_120331	101927468	Hs.515867	NR_120331		LOC101927468	-	uncharacterized LOC101927468	ncRNA
MEIS1_in_B13ko_peak_1854	chr7	138527858	138527858	+	14.8898	NA	intron (NM_015905, intron 5 of 18)	LTR76|LTR|ERV1	67524	NM_003852	8805	Hs.490287	NM_003852	ENSG00000122779	TRIM24	PTC6|RNF82|TF1A|TIF1|TIF1A|TIF1ALPHA|hTIF1	tripartite motif containing 24	protein-coding
MEIS1_in_B13ko_peak_1919	chr8	108942545	108942545	+	14.8388	NA	Intergenic	MER11B|LTR|ERVK	-144879	NM_003301	7201	Hs.3022	NM_003301	ENSG00000174417	TRHR	TRH-R	thyrotropin releasing hormone receptor	protein-coding
MEIS1_in_B13ko_peak_1841	chr7	123417778	123417778	+	14.8277	NA	Intergenic	THE1C-int|LTR|ERVL-MaLR	115170	NM_001321293	154865	Hs.159650	NM_178827	ENSG00000164675	IQUB	-	IQ motif and ubiquitin domain containing	protein-coding
MEIS1_in_B13ko_peak_29	chr1	21648029	21648029	+	14.8061	NA	intron (NM_001145658, intron 2 of 24)	intron (NM_001145658, intron 2 of 24)	3826	NM_001145658	5909	Hs.148178	NM_002885	ENSG00000076864	RAP1GAP	RAP1GA1|RAP1GAP1|RAP1GAPII|RAPGAP	RAP1 GTPase activating protein	protein-coding
MEIS1_in_B13ko_peak_406	chr11	65497564	65497564	+	14.7649	NA	promoter-TSS (NR_002819)	promoter-TSS (NR_002819)	-174	NR_144568	378938	Hs.621695	NR_002819	ENSG00000251562	MALAT1	HCN|LINC00047|NCRNA00047|NEAT2|PRO2853	metastasis associated lung adenocarcinoma transcript 1 (non-protein coding)	ncRNA
MEIS1_in_B13ko_peak_913	chr17	75785160	75785160	+	14.7483	NA	promoter-TSS (NR_039892)	promoter-TSS (NR_039892)	321	NR_038131	85451	Hs.584768	NM_001080419	ENSG00000132478	UNK	UNKEMPT|ZC3H5|ZC3HDC5	unkempt family zinc finger	protein-coding
MEIS1_in_B13ko_peak_1714	chr7	263087	263087	+	14.7318	NA	Intergenic	Intergenic	-27083	NM_001195127	100288524	Hs.702860	NM_001195127	ENSG00000248767	WI2-2373I1.2	-	forkhead box L1-like	ncRNA
MEIS1_in_B13ko_peak_366	chr10	133787369	133787369	+	14.7318	NA	Intergenic	G-rich|Low_complexity|Low_complexity	30811	NR_137167	100288687	Hs.728749	NM_001205218	ENSG00000260596	DUX4	DUX4L	double homeobox 4	protein-coding
MEIS1_in_B13ko_peak_516	chr12	56725421	56725421	+	14.7318	NA	promoter-TSS (NM_005594)	promoter-TSS (NM_005594)	121	NM_001320194	4666	Hs.505735	NM_005594	ENSG00000196531	NACA	HSD48|NAC-alpha|NACA1|skNAC	nascent polypeptide associated complex subunit alpha	protein-coding
MEIS1_in_B13ko_peak_1329	chr3	69542122	69542122	+	14.7318	NA	Intergenic	CpG	-155818	NM_015123	23150	Hs.371681	NM_015123	ENSG00000114541	FRMD4B	6030440G05Rik|GRSP1	FERM domain containing 4B	protein-coding
MEIS1_in_B13ko_peak_485	chr12	32044110	32044110	+	14.7318	NA	Intergenic	LTR10B1|LTR|ERV1	-63141	NM_001714	636	Hs.505202	NM_001714	ENSG00000151746	BICD1	BICD	BICD cargo adaptor 1	protein-coding
MEIS1_in_B13ko_peak_74	chr1	100890042	100890042	+	14.7318	NA	intron (NM_001261442, intron 1 of 3)	THE1D-int|LTR|ERVL-MaLR	5137	NM_001261442	2135	Hs.357637	NM_001439	ENSG00000162694	EXTL2	EXTR2	exostosin like glycosyltransferase 2	protein-coding
MEIS1_in_B13ko_peak_1469	chr4	41319795	41319795	+	14.6923	NA	Intergenic	L2c|LINE|L2	-39812	NM_001289124	22998	Hs.335163	NM_014988	ENSG00000064042	LIMCH1	LIMCH1A|LMO7B	LIM and calponin homology domains 1	protein-coding
MEIS1_in_B13ko_peak_1846	chr7	129586284	129586284	+	14.574	NA	Intergenic	LTR2|LTR|ERV1	-25418	NM_001293163	4899	Hs.654363	NM_005011	ENSG00000106459	NRF1	ALPHA-PAL	nuclear respiratory factor 1	protein-coding
MEIS1_in_B13ko_peak_546	chr12	92600246	92600246	+	14.528	NA	Intergenic	THE1D-int|LTR|ERVL-MaLR	-102597	NM_001037671	338809	Hs.326303	NM_001037671	ENSG00000214215	C12orf74	-	chromosome 12 open reading frame 74	protein-coding
MEIS1_in_B13ko_peak_1856	chr7	139340153	139340153	+	14.5063	NA	promoter-TSS (NM_001244584)	promoter-TSS (NM_001244584)	-206	NM_001244585	51631	Hs.731488	NM_016019	ENSG00000146963	LUC7L2	CGI-59|CGI-74|LUC7B2	LUC7 like 2, pre-mRNA splicing factor	protein-coding
MEIS1_in_B13ko_peak_1845	chr7	128899654	128899654	+	14.5063	NA	intron (NM_199349, intron 8 of 20)	PABL_A-int|LTR|ERV1	11065	NM_001135914	375616	Hs.371746	NM_199349	ENSG00000135253	KCP	CRIM2|KCP1|NET67	kielin/chordin-like protein	protein-coding
MEIS1_in_B13ko_peak_434	chr11	113906190	113906190	+	14.5063	NA	intron (NM_006028, intron 1 of 8)	intron (NM_006028, intron 1 of 8)	1394	NM_006028	9177	Hs.241377	NM_006028	ENSG00000149305	HTR3B	5-HT3B	5-hydroxytryptamine receptor 3B	protein-coding
MEIS1_in_B13ko_peak_525	chr12	60034040	60034040	+	14.4833	NA	Intergenic	THE1B-int|LTR|ERVL-MaLR	344703	NR_073055	9194	Hs.88156	NM_004731	ENSG00000118596	SLC16A7	MCT2	solute carrier family 16 member 7	protein-coding
MEIS1_in_B13ko_peak_1657	chr6	27753417	27753417	+	14.4251	NA	Intergenic	tRNA-Val-GTY|tRNA|tRNA	-8327	NR_038929	100131289	Hs.200573	NR_038929		LOC100131289	-	uncharacterized LOC100131289	ncRNA
MEIS1_in_B13ko_peak_528	chr12	62935298	62935298	+	14.4251	NA	promoter-TSS (NM_020700)	promoter-TSS (NM_020700)	-413	NM_020700	57460	Hs.435479	NM_020700	ENSG00000111110	PPM1H	ARHCL1|NERPP-2C|URCC2	protein phosphatase, Mg2+/Mn2+ dependent 1H	protein-coding
MEIS1_in_B13ko_peak_198	chr1	161540287	161540287	+	14.3798	NA	Intergenic	tRNA-Asn-AAC|tRNA|tRNA	9816	NM_001329122	2214	Hs.372679	NM_000569	ENSG00000203747	FCGR3A	CD16|CD16A|FCG3|FCGR3|FCGRIII|FCR-10|FCRIII|FCRIIIA|IGFR3|IMD20	Fc fragment of IgG receptor IIIa	protein-coding
MEIS1_in_B13ko_peak_337	chr10	56139499	56139499	+	14.3164	NA	Intergenic	Intergenic	221774	NM_007057	11130	Hs.591363	NM_007057	ENSG00000122952	ZWINT	HZwint-1|KNTC2AP|SIP30|ZWINT1	ZW10 interacting kinetochore protein	protein-coding
MEIS1_in_B13ko_peak_1	chr1	10268	10268	+	14.2115	NA	Intergenic	(TAACCC)n|Simple_repeat|Simple_repeat	-1606	NR_046018	100287102	Hs.618434	NR_046018	ENSG00000223972	DDX11L1	-	DEAD/H-box helicase 11 like 1	pseudo
MEIS1_in_B13ko_peak_239	chr1	198156910	198156910	+	14.1511	NA	promoter-TSS (NM_133494)	promoter-TSS (NM_133494)	-68	NM_133494	140609	Hs.24119	NM_133494	ENSG00000151414	NEK7	-	NIMA related kinase 7	protein-coding
MEIS1_in_B13ko_peak_832	chr17	8138966	8138966	+	14.1479	NA	Intergenic	Intergenic	6105	NR_106943	102465532		NR_106943	ENSG00000284117	MIR6883	hsa-mir-6883	microRNA 6883	ncRNA
MEIS1_in_B13ko_peak_972	chr19	2648801	2648801	+	14.1479	NA	intron (NM_052847, intron 1 of 4)	intron (NM_052847, intron 1 of 4)	18086	NR_107004	102465838		NR_107004	ENSG00000277904	MIR7850	hsa-mir-7850	microRNA 7850	ncRNA
MEIS1_in_B13ko_peak_95	chr1	144523903	144523903	+	14.1479	NA	Intergenic	U1|snRNA|snRNA	-64439	NM_001170755	284565	Hs.523572	NM_173638	ENSG00000266338	NBPF15	AB14|AG3|NBPF16	NBPF member 15	protein-coding
MEIS1_in_B13ko_peak_1938	chr9	20540348	20540348	+	14.1479	NA	intron (NM_001286691, intron 2 of 10)	THE1D-int|LTR|ERVL-MaLR	-38006	NR_039685	100616441		NR_039685	ENSG00000264941	MIR4474	-	microRNA 4474	ncRNA
MEIS1_in_B13ko_peak_328	chr10	22229539	22229539	+	14.1479	NA	Intergenic	tRNA-Asn-AAC|tRNA|tRNA	-19556	NM_001199938	340900	Hs.450519	NM_001199938	ENSG00000223601	EBLN1	EBLN-1	endogenous Bornavirus like nucleoprotein 1	protein-coding
MEIS1_in_B13ko_peak_1881	chr7	158982117	158982117	+	14.1479	NA	Intergenic	Intergenic	-26237	NR_024394	154822	Hs.544783	NM_198345	ENSG00000231419	LINC00689	-	long intergenic non-protein coding RNA 689	ncRNA
MEIS1_in_B13ko_peak_1932	chr8	145052456	145052456	+	14.1479	NA	promoter-TSS (NM_023080)	promoter-TSS (NM_023080)	18	NM_023080	65265	Hs.169615	NM_023080	ENSG00000182307	C8orf33	-	chromosome 8 open reading frame 33	protein-coding
MEIS1_in_B13ko_peak_1920	chr8	116069447	116069447	+	14.1479	NA	intron (NR_046215, intron 7 of 13)	MER57-int|LTR|ERV1	255612	NR_046215	100859921	Hs.552281	NR_046215	ENSG00000249917	LINC00536	-	long intergenic non-protein coding RNA 536	ncRNA
MEIS1_in_B13ko_peak_624	chr13	44917918	44917918	+	14.1479	NA	Intergenic	Intergenic	71560	NM_012345	26747	Hs.525006	NM_012345	ENSG00000083635	NUFIP1	NUFIP|bA540M5.1	NUFIP1, FMR1 interacting protein 1	protein-coding
MEIS1_in_B13ko_peak_911	chr17	75035166	75035166	+	14.1479	NA	intron (NR_110835, intron 2 of 7)	tRNA-Arg-CGG|tRNA|tRNA	2599	NR_110835	23510	Hs.514468	NM_015353	ENSG00000180901	KCTD2	-	potassium channel tetramerization domain containing 2	protein-coding
MEIS1_in_B13ko_peak_52	chr1	44731045	44731045	+	14.1479	NA	TTS (NR_002755)	TTS (NR_002755)	123	NR_002755	26830		NR_002755	ENSG00000200169	RNU5D-1	RNU5D|U5DL|U5DS	RNA, U5D small nuclear 1	snRNA
MEIS1_in_B13ko_peak_989	chr19	9621716	9621716	+	14.1479	NA	promoter-TSS (NM_152289)	promoter-TSS (NM_152289)	234	NR_122038	284385	Hs.651747	NM_001242812	ENSG00000267106	ZNF561-AS1	C19orf82	ZNF561 antisense RNA 1 (head to head)	ncRNA
MEIS1_in_B13ko_peak_864	chr17	39823854	39823854	+	14.1479	NA	intron (NM_001257409, intron 2 of 5)	THE1D-int|LTR|ERVL-MaLR	40334	NM_001284515	22806	Hs.371680	NM_012481	ENSG00000161405	IKZF3	AIO|AIOLOS|ZNFN1A3	IKAROS family zinc finger 3	protein-coding
MEIS1_in_B13ko_peak_1899	chr8	57597780	57597780	+	14.1479	NA	Intergenic	MER11B|LTR|ERVK	-148369	NR_134276	286178	Hs.255156	NR_134276	ENSG00000254139	LOC286178	-	uncharacterized LOC286178	ncRNA
MEIS1_in_B13ko_peak_1048	chr19	50334008	50334008	+	14.1479	NA	promoter-TSS (NR_110912)	promoter-TSS (NR_110912)	-493	NR_110912	3748	Hs.467146	NM_004977	ENSG00000131398	KCNC3	KSHIIID|KV3.3|SCA13	potassium voltage-gated channel subfamily C member 3	protein-coding
MEIS1_in_B13ko_peak_1940	chr9	24510410	24510410	+	14.1479	NA	Intergenic	THE1C-int|LTR|ERVL-MaLR	35266	NM_001271706	100129669	Hs.573530	NM_001271706	ENSG00000205442	IZUMO3	C9orf134|bA20A20.1	IZUMO family member 3	protein-coding
MEIS1_in_B13ko_peak_828	chr17	8119198	8119198	+	14.1479	NA	promoter-TSS (NM_021628)	promoter-TSS (NM_021628)	-282	NM_001165960	59344	Hs.232770	NM_021628	ENSG00000179148	ALOXE3	ARCI3|E-LOX|eLOX-3|eLOX3	arachidonate lipoxygenase 3	protein-coding
MEIS1_in_B13ko_peak_1304	chr3	4979837	4979837	+	14.1479	NA	non-coding (NR_037903, exon 1 of 3)	non-coding (NR_037903, exon 1 of 3)	124	NR_125915	100507582	Hs.434505	NR_037903	ENSG00000235831	BHLHE40-AS1	-	BHLHE40 antisense RNA 1	ncRNA
MEIS1_in_B13ko_peak_1586	chr5	171979771	171979771	+	14.1479	NA	intron (NM_012300, intron 1 of 12)	LTR10C|LTR|ERV1	27102	NM_012300	23291	Hs.484138	NM_012300	ENSG00000072803	FBXW11	BTRC2|BTRCP2|FBW1B|FBXW1B|Fbw11|Hos	F-box and WD repeat domain containing 11	protein-coding
MEIS1_in_B13ko_peak_63	chr1	79037287	79037287	+	14.1479	NA	Intergenic	MSTA-int|LTR|ERVL-MaLR	-30477	NM_022159	64123	Hs.132314	NM_022159	ENSG00000162618	ADGRL4	ELTD1|ETL|KPG_003	adhesion G protein-coupled receptor L4	protein-coding
MEIS1_in_B13ko_peak_772	chr16	3182687	3182687	+	14.1479	NA	Intergenic	tRNA-Pro-CCY|tRNA|tRNA	-21560	NM_012360	4992	Hs.664502	NM_012360	ENSG00000168124	OR1F1	OLFMF|OR16-36|OR16-37|OR16-88|OR16-89|OR16-90|OR1F10|OR1F13P|OR1F4|OR1F5|OR1F6|OR1F7|OR1F8|OR1F9|OR3-145|ORL1023	olfactory receptor family 1 subfamily F member 1	protein-coding
MEIS1_in_B13ko_peak_906	chr17	68019931	68019931	+	14.1479	NA	Intergenic	tRNA-Arg-AGG|tRNA|tRNA	-15671	NM_002266	3838	Hs.594238	NM_002266	ENSG00000182481	KPNA2	IPOA1|QIP2|RCH1|SRP1-alpha|SRP1alpha	karyopherin subunit alpha 2	protein-coding
MEIS1_in_B13ko_peak_1443	chr3_KI270782v1_alt	100418	100418	+	14.1479	NA	Intergenic	Intergenic	88023	NM_203315	622	Hs.274539	NM_004051	ENSG00000161267	BDH1	BDH|SDR9C1	3-hydroxybutyrate dehydrogenase 1	protein-coding
MEIS1_in_B13ko_peak_368	chr11	362029	362029	+	14.1479	NA	Intergenic	LTR13|LTR|ERVK	-7766	NM_178537	338707	Hs.148074	NM_178537	ENSG00000182272	B4GALNT4	-	beta-1,4-N-acetyl-galactosaminyltransferase 4	protein-coding
MEIS1_in_B13ko_peak_793	chr16	29765652	29765652	+	14.1479	NA	Intergenic	Intergenic	-12588	NM_152338	653808	Hs.632195	NM_152338	ENSG00000174992	ZG16	JCLN|JCLN1|ZG16A	zymogen granule protein 16	protein-coding
MEIS1_in_B13ko_peak_635	chr13	75280169	75280169	+	14.1479	NA	Intergenic	LTR22A|LTR|ERVK	39581	NR_132375	106144536	Hs.591226	NR_132375		LINC01078	-	long intergenic non-protein coding RNA 1078	ncRNA
MEIS1_in_B13ko_peak_1496	chr4	116015250	116015250	+	14.1479	NA	Intergenic	LTR76|LTR|ERV1	-284475	NR_031737	100302290		NR_031737	ENSG00000284253	MIR1973	hsa-mir-1973|mir-1973	microRNA 1973	ncRNA
MEIS1_in_B13ko_peak_1961	chr9	70475354	70475354	+	14.1479	NA	Intergenic	Intergenic	-60697	NM_001206	687	Hs.150557	NM_001206	ENSG00000119138	KLF9	BTEB|BTEB1	Kruppel like factor 9	protein-coding
MEIS1_in_B13ko_peak_1885	chr8	11284366	11284366	+	14.1479	NA	promoter-TSS (NM_015458)	promoter-TSS (NM_015458)	-125	NM_015458	66036	Hs.591395	NM_015458	ENSG00000104643	MTMR9	C8orf9|LIP-STYX|MTMR8	myotubularin related protein 9	protein-coding
MEIS1_in_B13ko_peak_1926	chr8	139861164	139861164	+	14.1479	NA	intron (NM_031466, intron 21 of 22)	LTR10A|LTR|ERV1	-158108	NM_001282534	51305	Hs.493037	NM_001282534	ENSG00000169427	KCNK9	K2p9.1|KT3.2|TASK-3|TASK3	potassium two pore domain channel subfamily K member 9	protein-coding
MEIS1_in_B13ko_peak_661	chr14	20681731	20681731	+	14.1479	NA	Intergenic	tRNA-Thr-ACA|tRNA|tRNA	-2446	NM_001145	283	Hs.283749	NM_001145	ENSG00000214274	ANG	ALS9|HEL168|RAA1|RNASE4|RNASE5	angiogenin	protein-coding
MEIS1_in_B13ko_peak_1918	chr8	106673966	106673966	+	14.1479	NA	intron (NM_181354, intron 1 of 13)	THE1D-int|LTR|ERVL-MaLR	16158	NM_181354	55074	Hs.127286	NM_018002	ENSG00000164830	OXR1	Nbla00307|TLDC3	oxidation resistance 1	protein-coding
MEIS1_in_B13ko_peak_1726	chr7	5064497	5064497	+	14.1479	NA	exon (NM_001204456, exon 6 of 6)	exon (NM_001204456, exon 6 of 6)	-7563	NR_015343	389458	Hs.733005	NM_203393	ENSG00000273313	RBAKDN	-	RBAK downstream neighbor (non-protein coding)	ncRNA
MEIS1_in_B13ko_peak_1393	chr3	150501180	150501180	+	14.1479	NA	Intergenic	THE1D-int|LTR|ERVL-MaLR	45461	NM_014445	27230	Hs.518326	NM_014445	ENSG00000120742	SERP1	RAMP4	stress associated endoplasmic reticulum protein 1	protein-coding
MEIS1_in_B13ko_peak_1068	chr1_KI270765v1_alt	63125	63125	+	14.1479	NA	Intergenic	U1|snRNA|snRNA	-41035	NM_001164261	645142	Hs.730589	NM_001164261	ENSG00000256374	PPIAL4D	-	peptidylprolyl isomerase A like 4D	protein-coding
MEIS1_in_B13ko_peak_1665	chr6	51119011	51119011	+	14.1479	NA	Intergenic	Intergenic	300285	NM_003221	7021	Hs.33102	NM_003221	ENSG00000008196	TFAP2B	AP-2B|AP2-B|PDA2	transcription factor AP-2 beta	protein-coding
MEIS1_in_B13ko_peak_1513	chr4	189235150	189235150	+	14.1387	NA	Intergenic	Intergenic	-424456	NR_121679	101928971	Hs.519164	NR_121679	ENSG00000250739	LINC01262	TCONS_l2_00021807	long intergenic non-protein coding RNA 1262	ncRNA
MEIS1_in_B13ko_peak_526	chr12	61287628	61287628	+	14.1337	NA	Intergenic	MSTA-int|LTR|ERVL-MaLR	905211	NM_178539	338811	Hs.269745	NM_178539	ENSG00000198673	FAM19A2	TAFA-2|TAFA2	family with sequence similarity 19 member A2, C-C motif chemokine like	protein-coding
MEIS1_in_B13ko_peak_534	chr12	67714850	67714850	+	14.0684	NA	intron (NR_110063, intron 4 of 4)	intron (NR_110063, intron 4 of 4)	14625	NR_110063	101927901	Hs.369609	NR_110063	ENSG00000255970	LINC02421	-	long intergenic non-protein coding RNA 2421	ncRNA
MEIS1_in_B13ko_peak_541	chr12	87165922	87165922	+	14.0364	NA	Intergenic	THE1D-int|LTR|ERVL-MaLR	-164817	NR_135020	105369879	Hs.552351	NR_135020		LOC105369879	-	uncharacterized LOC105369879	ncRNA
MEIS1_in_B13ko_peak_1863	chr7	149529312	149529312	+	14.0256	NA	Intergenic	LTR25-int|LTR|ERV1	-31505	NM_001163474	155061	Hs.24643	NM_152557	ENSG00000181220	ZNF746	PARIS	zinc finger protein 746	protein-coding
MEIS1_in_B13ko_peak_1960	chr9	67754478	67754478	+	14.0256	NA	Intergenic	LTR76|LTR|ERV1	-27735	NR_027422	100133121	Hs.744835	NR_027422		FAM27B	FAM27A2	family with sequence similarity 27 member B	ncRNA
MEIS1_in_B13ko_peak_1348	chr3	102152160	102152160	+	13.9983	NA	Intergenic	THE1B-int|LTR|ERVL-MaLR	-11545	NR_135549	101929411	Hs.506540	NR_135549		LOC101929411	-	uncharacterized LOC101929411	ncRNA
MEIS1_in_B13ko_peak_1835	chr7	118761263	118761263	+	13.9398	NA	Intergenic	LTR18C|LTR|ERVL	536605	NM_019644	56311	Hs.729340	NM_019644	ENSG00000106013	ANKRD7	TSA806	ankyrin repeat domain 7	protein-coding
MEIS1_in_B13ko_peak_1754	chr7	39882359	39882359	+	13.9316	NA	Intergenic	LTR10G|LTR|ERV1	-68001	NM_003718	8621	Hs.233552	NM_003718	ENSG00000065883	CDK13	CDC2L|CDC2L5|CHDFIDD|CHED|hCDK13	cyclin dependent kinase 13	protein-coding
MEIS1_in_B13ko_peak_5	chr1	1288497	1288497	+	13.9286	NA	intron (NM_001130413, intron 12 of 17)	CpG-77	7673	NR_106784	102465434		NR_106784	ENSG00000278073	MIR6726	hsa-mir-6726	microRNA 6726	ncRNA
MEIS1_in_B13ko_peak_784	chr16	21514411	21514411	+	13.9286	NA	Intergenic	Intergenic	6033	NR_002594	387254	Hs.448808	NR_002594		SLC7A5P2	IMAA|MMAA	solute carrier family 7 member 5 pseudogene 2	pseudo
MEIS1_in_B13ko_peak_811	chr16	83950448	83950448	+	13.9286	NA	Intergenic	(ACAC)n|Simple_repeat|Simple_repeat	-2774	NM_182981	29948	Hs.128055	NM_013370	ENSG00000140961	OSGIN1	BDGI|OKL38	oxidative stress induced growth inhibitor 1	protein-coding
MEIS1_in_B13ko_peak_591	chr12	124921796	124921796	+	13.9286	NA	Intergenic	tRNA-Ala-GCG|tRNA|tRNA	6249	NR_049820	100847004		NR_049820	ENSG00000265345	MIR5188	mir-5188	microRNA 5188	ncRNA
MEIS1_in_B13ko_peak_1907	chr8	70669376	70669376	+	13.9286	NA	promoter-TSS (NM_016027)	promoter-TSS (NM_016027)	11	NM_001011720	389668	Hs.458938	NM_001011720	ENSG00000221947	XKR9	XRG9	XK related 9	protein-coding
MEIS1_in_B13ko_peak_35	chr1	26695599	26695599	+	13.9114	NA	promoter-TSS (NM_139135)	promoter-TSS (NM_139135)	-432	NM_139135	8289	Hs.468972	NM_006015	ENSG00000117713	ARID1A	B120|BAF250|BAF250a|BM029|C1orf4|CSS2|ELD|MRD14|OSA1|P270|SMARCF1|hELD|hOSA1	AT-rich interaction domain 1A	protein-coding
MEIS1_in_B13ko_peak_1836	chr7	120456888	120456888	+	13.8799	NA	intron (NM_012281, intron 1 of 5)	THE1C-int|LTR|ERVL-MaLR	183220	NM_012281	3751	Hs.654739	NM_012281	ENSG00000184408	KCND2	KV4.2|RK5	potassium voltage-gated channel subfamily D member 2	protein-coding
MEIS1_in_B13ko_peak_936	chr18	26624644	26624644	+	13.7858	NA	intron (NM_001258222, intron 1 of 4)	THE1C-int|LTR|ERVL-MaLR	15700	NM_198991	284252	Hs.526630	NM_198991	ENSG00000134504	KCTD1	C18orf5	potassium channel tetramerization domain containing 1	protein-coding
MEIS1_in_B13ko_peak_1939	chr9	23882642	23882642	+	13.7858	NA	Intergenic	THE1B-int|LTR|ERVL-MaLR	-56577	NM_004432	1993	Hs.166109	NM_004432	ENSG00000107105	ELAVL2	HEL-N1|HELN1|HUB	ELAV like RNA binding protein 2	protein-coding
MEIS1_in_B13ko_peak_243	chr1	202204580	202204580	+	13.7858	NA	intron (NM_021636, intron 1 of 17)	(CA)n|Simple_repeat|Simple_repeat	803	NM_021636	59352	Hs.497402	NM_021636	ENSG00000133067	LGR6	GPCR|VTS20631	leucine rich repeat containing G protein-coupled receptor 6	protein-coding
MEIS1_in_B13ko_peak_1012	chr19	33177118	33177118	+	13.7858	NA	Intergenic	CpG	-17575	NM_002333	4037	Hs.515340	NM_002333	ENSG00000130881	LRP3	-	LDL receptor related protein 3	protein-coding
MEIS1_in_B13ko_peak_412	chr11	68082639	68082639	+	13.7858	NA	intron (NM_001277, intron 2 of 11)	intron (NM_001277, intron 2 of 11)	37845	NR_106811	102465451		NR_106811	ENSG00000275022	MIR6753	hsa-mir-6753	microRNA 6753	ncRNA
MEIS1_in_B13ko_peak_1108	chr2	87203024	87203024	+	13.7858	NA	Intergenic	Intergenic	8238	NR_039929	100616165		NR_039929	ENSG00000266063	MIR4771-2	-	microRNA 4771-2	ncRNA
MEIS1_in_B13ko_peak_1593	chr5	177807307	177807307	+	13.7858	NA	Intergenic	REP522|Satellite|telo	-26803	NM_173663	285596	Hs.368516	NM_173663	ENSG00000170074	FAM153A	NY-REN-7	family with sequence similarity 153 member A	protein-coding
MEIS1_in_B13ko_peak_1014	chr19	35755805	35755805	+	13.7858	NA	exon (NM_144617, exon 2 of 3)	exon (NM_144617, exon 2 of 3)	1224	NM_144617	126393	Hs.534538	NM_144617	ENSG00000004776	HSPB6	HEL55|Hsp20|PPP1R91	heat shock protein family B (small) member 6	protein-coding
MEIS1_in_B13ko_peak_1605	chr5	181191765	181191765	+	13.7858	NA	non-coding (NR_108031, exon 1 of 2)	non-coding (NR_108031, exon 1 of 2)	143	NR_108031	102577426	Hs.277359	NR_108031	ENSG00000248473	LINC01962	-	long intergenic non-protein coding RNA 1962	ncRNA
MEIS1_in_B13ko_peak_1680	chr6	91966094	91966094	+	13.7858	NA	Intergenic	THE1C-int|LTR|ERVL-MaLR	-275666	NR_104154	101929083	Hs.586238	NR_104154		CASC6	-	cancer susceptibility 6 (non-protein coding)	ncRNA
MEIS1_in_B13ko_peak_1737	chr7	23795436	23795436	+	13.7475	NA	intron (NM_001260505, intron 22 of 22)	THE1C-int|LTR|ERVL-MaLR	85110	NM_032944	56164	Hs.309767	NM_031414	ENSG00000196335	STK31	SGK396|TDRD8	serine/threonine kinase 31	protein-coding
MEIS1_in_B13ko_peak_1770	chr7	65404212	65404212	+	13.6838	NA	Intergenic	HUERS-P3-int|LTR|ERV1	30413	NM_001287533	168374	Hs.9521	NM_007139	ENSG00000146757	ZNF92	HEL-203|HPF12|HTF12|TF12	zinc finger protein 92	protein-coding
MEIS1_in_B13ko_peak_1743	chr7	27165865	27165865	+	13.6196	NA	promoter-TSS (NM_152739)	promoter-TSS (NM_152739)	-335	NM_152739	3205	Hs.659350	NM_152739	ENSG00000078399	HOXA9	ABD-B|HOX1|HOX1.7|HOX1G	homeobox A9	protein-coding
MEIS1_in_B13ko_peak_1356	chr3	120894402	120894402	+	13.6196	NA	Intergenic	Intergenic	-13801	NM_001308330	9515	Hs.477315	NM_014980	ENSG00000145087	STXBP5L	LLGL4	syntaxin binding protein 5 like	protein-coding
MEIS1_in_B13ko_peak_1778	chr7	72736033	72736033	+	13.6196	NA	intron (NM_001145440, intron 8 of 13)	LTR10C|LTR|ERV1	38130	NR_039794	100616331		NR_039794	ENSG00000264494	MIR4650-2	-	microRNA 4650-2	ncRNA
MEIS1_in_B13ko_peak_479	chr12	30272716	30272716	+	13.6089	NA	Intergenic	THE1C-int|LTR|ERVL-MaLR	404528	NM_001190995	10526	Hs.505136	NM_006390	ENSG00000133704	IPO8	RANBP8	importin 8	protein-coding
MEIS1_in_B13ko_peak_329	chr10	22436983	22436983	+	13.6081	NA	non-coding (NR_036533, exon 1 of 1)	non-coding (NR_036533, exon 1 of 1)	946	NR_036533	100499489	Hs.7444	NR_036533		LOC100499489	-	uncharacterized LOC100499489	ncRNA
MEIS1_in_B13ko_peak_1792	chr7	85179105	85179105	+	13.5273	NA	Intergenic	THE1C-int|LTR|ERVL-MaLR	-57174	NM_152754	223117	Hs.201340	NM_152754	ENSG00000153993	SEMA3D	Sema-Z2|coll-2	semaphorin 3D	protein-coding
MEIS1_in_B13ko_peak_1340	chr3	96101230	96101230	+	13.5273	NA	Intergenic	L1PA17|LINE|L1	-258734	NR_107027	102465864		NR_107027	ENSG00000278103	MIR8060	hsa-mir-8060	microRNA 8060	ncRNA
MEIS1_in_B13ko_peak_468	chr12	14351724	14351724	+	13.4986	NA	Intergenic	THE1C-int|LTR|ERVL-MaLR	-13908	NM_001286515	55729	Hs.504856	NM_018179	ENSG00000171681	ATF7IP	AM|ATF-IP|MCAF|MCAF1|p621	activating transcription factor 7 interacting protein	protein-coding
MEIS1_in_B13ko_peak_741	chr15	74956341	74956341	+	13.4565	NA	exon (NM_017793, exon 1 of 1)	exon (NM_017793, exon 1 of 1)	1093	NM_017793	54913	Hs.8562	NM_017793	ENSG00000178718	RPP25	-	ribonuclease P and MRP subunit p25	protein-coding
MEIS1_in_B13ko_peak_306	chr1	244918866	244918866	+	13.4499	NA	Intergenic	CpG	-51003	NM_032328	84288	Hs.134857	NM_032328	ENSG00000203666	EFCAB2	CFAP200|DRC8	EF-hand calcium binding domain 2	protein-coding
MEIS1_in_B13ko_peak_1690	chr6	111162702	111162702	+	13.4268	NA	intron (NM_018593, intron 1 of 5)	LTR25-int|LTR|ERV1	75124	NM_018593	117247	Hs.591327	NM_018593	ENSG00000112394	SLC16A10	MCT10|PRO0813|TAT1	solute carrier family 16 member 10	protein-coding
MEIS1_in_B13ko_peak_1839	chr7	121511058	121511058	+	13.4268	NA	Intergenic	LTR10B2|LTR|ERV1	-114690	NM_001040020	10447	Hs.434053	NM_014888	ENSG00000196937	FAM3C	GS3786|ILEI	family with sequence similarity 3 member C	protein-coding
MEIS1_in_B13ko_peak_200	chr1	163321833	163321833	+	13.4072	NA	promoter-TSS (NM_031423)	promoter-TSS (NM_031423)	-42	NM_001254748	8490	Hs.24950	NM_003617	ENSG00000143248	RGS5	MST092|MST106|MST129|MSTP032|MSTP092|MSTP106|MSTP129	regulator of G protein signaling 5	protein-coding
MEIS1_in_B13ko_peak_456	chr12	6778955	6778955	+	13.4055	NA	TTS (NM_002286)	TTS (NM_002286)	6451	NM_002286	3902	Hs.409523	NM_002286	ENSG00000089692	LAG3	CD223	lymphocyte activating 3	protein-coding
MEIS1_in_B13ko_peak_1629	chr6	26330347	26330347	+	13.3383	NA	Intergenic	tRNA-Met-i|tRNA|tRNA	-34812	NM_007047	11118	Hs.376046	NM_007047	ENSG00000186470	BTN3A2	BT3.2|BTF4|BTN3.2|CD277	butyrophilin subfamily 3 member A2	protein-coding
MEIS1_in_B13ko_peak_1596	chr5	180072244	180072244	+	13.3067	NA	promoter-TSS (NM_001280801)	promoter-TSS (NM_001280801)	-126	NM_018434	55819	Hs.484363	NM_018434	ENSG00000113269	RNF130	G1RZFP|GOLIATH|GP	ring finger protein 130	protein-coding
MEIS1_in_B13ko_peak_443	chr12	11403	11403	+	13.3067	NA	Intergenic	TAR1|Satellite|telo	20612	NR_130745	100288778	Hs.459573	NR_130745	ENSG00000226210	LOC100288778	-	WASH complex subunit 1 pseudogene	pseudo
MEIS1_in_B13ko_peak_1138	chr2	231707158	231707158	+	13.2704	NA	Intergenic	CpG	-1367	NM_001099285	5757	Hs.459927	NM_002823	ENSG00000187514	PTMA	TMSA	prothymosin alpha	protein-coding
MEIS1_in_B13ko_peak_217	chr1	180231625	180231625	+	13.2565	NA	intron (NM_033343, intron 1 of 5)	CpG-2007	1327	NM_033343	89884	Hs.658487	NM_033343	ENSG00000121454	LHX4	CPHD4	LIM homeobox 4	protein-coding
MEIS1_in_B13ko_peak_1753	chr7	39714910	39714910	+	13.2025	NA	Intergenic	MSTA-int|LTR|ERVL-MaLR	-18658	NR_026999	349114	Hs.414183	NM_198284		LINC00265	NCRNA00265	long intergenic non-protein coding RNA 265	ncRNA
MEIS1_in_B13ko_peak_998	chr19	12919305	12919305	+	13.2025	NA	promoter-TSS (NM_001105578)	promoter-TSS (NM_001105578)	-33	NM_001105578	256126	Hs.655173	NM_001105578	ENSG00000161860	SYCE2	CESC1	synaptonemal complex central element protein 2	protein-coding
MEIS1_in_B13ko_peak_435	chr11	114179350	114179350	+	13.2025	NA	intron (NM_001018011, intron 3 of 6)	intron (NM_001018011, intron 3 of 6)	-116463	NM_006169	4837	Hs.503911	NM_006169	ENSG00000166741	NNMT	-	nicotinamide N-methyltransferase	protein-coding
MEIS1_in_B13ko_peak_430	chr11	103541417	103541417	+	13.2025	NA	Intergenic	LTR18A|LTR|ERVL	-308489	NR_039842	100616457		NR_039842	ENSG00000264200	MIR4693	-	microRNA 4693	ncRNA
MEIS1_in_B13ko_peak_1532	chr5	43042792	43042792	+	13.2025	NA	non-coding (NR_015447, exon 1 of 2)	non-coding (NR_015447, exon 1 of 2)	658	NR_015447	153684	Hs.259625	NR_015447	ENSG00000215068	LOC153684	-	uncharacterized LOC153684	ncRNA
MEIS1_in_B13ko_peak_1648	chr6	27503766	27503766	+	13.2025	NA	Intergenic	tRNA-Asp-GAY|tRNA|tRNA	-30648	NM_001347832	7738	Hs.158174	NM_007149	ENSG00000096654	ZNF184	kr-ZNF3	zinc finger protein 184	protein-coding
MEIS1_in_B13ko_peak_1013	chr19	34677295	34677295	+	13.2025	NA	promoter-TSS (NR_027620)	promoter-TSS (NR_027620)	-264	NR_027620	643719	Hs.686754	NR_027620		SCGB1B2P	SCGB4A1P	secretoglobin family 1B member 2, pseudogene	pseudo
MEIS1_in_B13ko_peak_1163	chr20	52221125	52221125	+	13.2025	NA	Intergenic	THE1D-int|LTR|ERVL-MaLR	-29140	NM_199426	55734	Hs.473082	NM_018197	ENSG00000020256	ZFP64	ZNF338	ZFP64 zinc finger protein	protein-coding
MEIS1_in_B13ko_peak_1688	chr6	108684988	108684988	+	13.2025	NA	TTS (NM_001455)	TTS (NM_001455)	-66666	NR_033376	387111	Hs.520310	NR_033376	ENSG00000203801	LINC00222	C6orf181|NCRNA00222|dJ354J5.2	long intergenic non-protein coding RNA 222	ncRNA
MEIS1_in_B13ko_peak_1317	chr3	32043097	32043097	+	13.2025	NA	Intergenic	MER11A|LTR|ERVK	-61247	NM_001174060	114884	Hs.150122	NM_017784	ENSG00000144645	OSBPL10	ORP10|OSBP9	oxysterol binding protein like 10	protein-coding
MEIS1_in_B13ko_peak_1364	chr3	127356755	127356755	+	13.2025	NA	intron (NR_110147, intron 1 of 4)	THE1C-int|LTR|ERVL-MaLR	33915	NR_110147	101927123	Hs.526761	NR_110147	ENSG00000244215	LINC02016	-	long intergenic non-protein coding RNA 2016	ncRNA
MEIS1_in_B13ko_peak_1027	chr19	44477328	44477328	+	13.2025	NA	exon (NM_001278509, exon 5 of 5)	exon (NM_001278509, exon 5 of 5)	23195	NM_001288760	7733	Hs.22305	NM_013256	ENSG00000167384	ZNF180	HHZ168	zinc finger protein 180	protein-coding
MEIS1_in_B13ko_peak_1487	chr4	98193656	98193656	+	13.2025	NA	Intergenic	LTR10E|LTR|ERV1	-50416	NM_174952	285555	Hs.680226	NM_174952	ENSG00000163116	STPG2	C4orf37	sperm tail PG-rich repeat containing 2	protein-coding
MEIS1_in_B13ko_peak_2044	chrY	222389	222389	+	13.2025	NA	Intergenic	(ACCCTA)n|Simple_repeat|Simple_repeat	-53935	NR_028057	55344	Hs.522568	NM_018390	ENSG00000182378	PLCXD1	LL0XNC01-136G2.1	phosphatidylinositol specific phospholipase C X domain containing 1	protein-coding
MEIS1_in_B13ko_peak_1502	chr4	140154256	140154256	+	13.2025	NA	promoter-TSS (NM_018717)	promoter-TSS (NM_018717)	-177	NM_018717	55534	Hs.586165	NM_018717	ENSG00000196782	MAML3	CAGH3|ERDA3|GDN|MAM-2|MAM2|TNRC3	mastermind like transcriptional coactivator 3	protein-coding
MEIS1_in_B13ko_peak_1416	chr3	178987951	178987951	+	13.2025	NA	Intergenic	LTR8B|LTR|ERV1	83917	NM_152240	64393	Hs.371609	NM_022470	ENSG00000172667	ZMAT3	PAG608|WIG-1|WIG1	zinc finger matrin-type 3	protein-coding
MEIS1_in_B13ko_peak_1640	chr6	26571888	26571888	+	13.2025	NA	intron (NR_134611, intron 1 of 1)	tRNA-Ala-GCY|tRNA|tRNA	2564	NR_134611	105374988	Hs.551772	NR_134611	ENSG00000284607	LOC105374988	-	uncharacterized LOC105374988	ncRNA
MEIS1_in_B13ko_peak_68	chr1	92085903	92085903	+	13.2025	NA	intron (NM_183242, intron 1 of 8)	LTR14B|LTR|ERVK	5598	NM_183242	284697	Hs.676102	NM_183242	ENSG00000189195	BTBD8	-	BTB domain containing 8	protein-coding
MEIS1_in_B13ko_peak_46	chr1	32414695	32414695	+	13.2025	NA	Intergenic	HUERS-P3b-int|LTR|ERV1	-20234	NM_001143888	55108	Hs.353454	NM_018045	ENSG00000160058	BSDC1	-	BSD domain containing 1	protein-coding
MEIS1_in_B13ko_peak_1155	chr20	31604326	31604326	+	13.2025	NA	promoter-TSS (NM_181353)	promoter-TSS (NM_181353)	-957	NM_002165	3397	Hs.504609	NM_002165	ENSG00000125968	ID1	ID|bHLHb24	inhibitor of DNA binding 1, HLH protein	protein-coding
MEIS1_in_B13ko_peak_527	chr12	61898425	61898425	+	13.168	NA	intron (NM_178539, intron 1 of 4)	THE1D-int|LTR|ERVL-MaLR	294414	NM_178539	338811	Hs.269745	NM_178539	ENSG00000198673	FAM19A2	TAFA-2|TAFA2	family with sequence similarity 19 member A2, C-C motif chemokine like	protein-coding
MEIS1_in_B13ko_peak_968	chr19	1065087	1065087	+	13.1368	NA	promoter-TSS (NM_001258328)	promoter-TSS (NM_001258328)	-836	NM_001258328	23526	Hs.465521	NM_012292	ENSG00000180448	ARHGAP45	HA-1|HLA-HA1|HMHA1	Rho GTPase activating protein 45	protein-coding
MEIS1_in_B13ko_peak_735	chr15	56733724	56733724	+	13.118	NA	5' UTR (NM_001002843, exon 1 of 21)	5' UTR (NM_001002843, exon 1 of 21)	362	NM_001288589	54816	Hs.511477	NM_017661	ENSG00000137871	ZNF280D	SUHW4|ZNF634	zinc finger protein 280D	protein-coding
MEIS1_in_B13ko_peak_1558	chr5	91380155	91380155	+	13.1131	NA	promoter-TSS (NR_027435)	promoter-TSS (NR_027435)	142	NM_001329671	57561	Hs.24684	NM_020801	ENSG00000113369	ARRDC3	TLIMP	arrestin domain containing 3	protein-coding
MEIS1_in_B13ko_peak_1396	chr3	152787178	152787178	+	13.1131	NA	Intergenic	HERV35I-int|LTR|ERV1	-47515	NM_002563	5028	Hs.79881	NM_002563	ENSG00000169860	P2RY1	P2Y1|SARCC	purinergic receptor P2Y1	protein-coding
MEIS1_in_B13ko_peak_1736	chr7	23597251	23597251	+	13.0538	NA	promoter-TSS (NM_138771)	promoter-TSS (NM_138771)	-128	NM_138771	90693	Hs.232296	NM_138771	ENSG00000169193	CCDC126	-	coiled-coil domain containing 126	protein-coding
MEIS1_in_B13ko_peak_1286	chr22_KI270733v1_random	142758	142758	+	13.0476	NA	Intergenic	AluSp|SINE|Alu	12554	NR_003287	100008589		NR_003287		RNA28SN5	RN28S1|RNA28S5	RNA, 28S ribosomal N5	rRNA
MEIS1_in_B13ko_peak_233	chr1	192430853	192430853	+	12.9927	NA	Intergenic	THE1D-int|LTR|ERVL-MaLR	113861	NM_001039152	431704	Hs.558673	NM_001039152	ENSG00000253148	RGS21	-	regulator of G protein signaling 21	protein-coding
MEIS1_in_B13ko_peak_1287	chr22_KI270733v1_random	144290	144290	+	12.8949	NA	Intergenic	AluSz|SINE|Alu	14086	NR_003287	100008589		NR_003287		RNA28SN5	RN28S1|RNA28S5	RNA, 28S ribosomal N5	rRNA
MEIS1_in_B13ko_peak_1185	chr21	8225604	8225604	+	12.8846	NA	intron (NR_038958, intron 5 of 6)	AluJr|SINE|Alu	11716	NR_003287	100008589		NR_003287		RNA28SN5	RN28S1|RNA28S5	RNA, 28S ribosomal N5	rRNA
MEIS1_in_B13ko_peak_1252	chr22	19723405	19723405	+	12.8618	NA	promoter-TSS (NM_000407)	promoter-TSS (NM_000407)	-138	NM_000407	2812	Hs.283743	NM_000407	ENSG00000203618	GP1BB	BDPLT1|BS|CD42C|GPIBB|GPIbbeta	glycoprotein Ib platelet subunit beta	protein-coding
MEIS1_in_B13ko_peak_816	chr16	88839228	88839228	+	12.8441	NA	intron (NM_001323544, intron 5 of 14)	CpG	-16992	NR_134671	51693	Hs.461722	NM_016209	ENSG00000167515	TRAPPC2L	HSPC176	trafficking protein particle complex 2 like	protein-coding
MEIS1_in_B13ko_peak_2039	chrX	222397	222397	+	12.8441	NA	Intergenic	(ACCCTA)n|Simple_repeat|Simple_repeat	-53927	NR_028057	55344	Hs.522568	NM_018390	ENSG00000182378	PLCXD1	LL0XNC01-136G2.1	phosphatidylinositol specific phospholipase C X domain containing 1	protein-coding
MEIS1_in_B13ko_peak_740	chr15	70099743	70099743	+	12.8441	NA	Intergenic	CpG-8376	-1826	NM_001282979	7090	Hs.287362	NM_005078	ENSG00000140332	TLE3	ESG|ESG3|GRG3|HsT18976	transducin like enhancer of split 3	protein-coding
MEIS1_in_B13ko_peak_921	chr17	82593154	82593154	+	12.8441	NA	intron (NM_004514, intron 8 of 8)	intron (NM_004514, intron 8 of 8)	55381	NM_019613	56270	Hs.132161	NM_019613	ENSG00000141580	WDR45B	WDR45L|WIPI-3|WIPI3	WD repeat domain 45B	protein-coding
MEIS1_in_B13ko_peak_738	chr15	65304816	65304816	+	12.8441	NA	TTS (NR_002757)	TTS (NR_002757)	139	NR_002757	26832		NR_002757	ENSG00000200156	RNU5B-1	RNU5B|RNU5B-1P|U5B1	RNA, U5B small nuclear 1	snRNA
MEIS1_in_B13ko_peak_1750	chr7	37916361	37916361	+	12.841	NA	exon (NM_003014, exon 1 of 6)	exon (NM_003014, exon 1 of 6)	562	NM_003014	6424	Hs.658169	NM_003014	ENSG00000106483	SFRP4	FRP-4|FRPHE|FRZB-2|PYL|sFRP-4	secreted frizzled related protein 4	protein-coding
MEIS1_in_B13ko_peak_1344	chr3	100179884	100179884	+	12.841	NA	Intergenic	MSTA-int|LTR|ERVL-MaLR	-5940	NR_028358	644444	Hs.652353	NR_028357	ENSG00000235156	TMEM30CP	CDC50C|TMEM30C	transmembrane protein 30C, pseudogene	pseudo
MEIS1_in_B13ko_peak_1554	chr5	81751085	81751085	+	12.7775	NA	5' UTR (NM_001256732, exon 1 of 17)	5' UTR (NM_001256732, exon 1 of 17)	168	NM_012446	23635	Hs.102735	NM_012446	ENSG00000145687	SSBP2	HSPC116|SOSS-B2	single stranded DNA binding protein 2	protein-coding
MEIS1_in_B13ko_peak_206	chr1	168179347	168179347	+	12.7684	NA	intron (NM_001031800, intron 1 of 4)	CpG	502	NM_001031800	261726	Hs.209431	NM_152902	ENSG00000143155	TIPRL	TIP|TIP41|TIPRL1	TOR signaling pathway regulator	protein-coding
MEIS1_in_B13ko_peak_1833	chr7	115206588	115206588	+	12.7153	NA	intron (NR_126407, intron 1 of 4)	THE1C-int|LTR|ERVL-MaLR	24767	NR_126407	104355291		NR_126407	ENSG00000233607	LINC01392	-	long intergenic non-protein coding RNA 1392	ncRNA
MEIS1_in_B13ko_peak_1099	chr2	70249032	70249032	+	12.7145	NA	promoter-TSS (NM_022037)	promoter-TSS (NM_022037)	-385	NM_022037	7072	Hs.413123	NM_022037	ENSG00000116001	TIA1	TIA-1|WDM	TIA1 cytotoxic granule associated RNA binding protein	protein-coding
MEIS1_in_B13ko_peak_977	chr19	3785746	3785746	+	12.7122	NA	intron (NM_139355, intron 1 of 13)	CpG	671	NM_139354	4145	Hs.631845	NM_002378	ENSG00000007264	MATK	CHK|CTK|HHYLTK|HYL|HYLTK|Lsk	megakaryocyte-associated tyrosine kinase	protein-coding
MEIS1_in_B13ko_peak_359	chr10	102644966	102644966	+	12.7122	NA	exon (NM_030912, exon 1 of 6)	exon (NM_030912, exon 1 of 6)	471	NM_001345950	81603	Hs.336810	NM_030912	ENSG00000171206	TRIM8	GERP|RNF27	tripartite motif containing 8	protein-coding
MEIS1_in_B13ko_peak_315	chr1	247104476	247104476	+	12.5905	NA	promoter-TSS (NM_001142572)	promoter-TSS (NM_001142572)	-104	NM_024804	79862	Hs.163754	NM_024804	ENSG00000188295	ZNF669	-	zinc finger protein 669	protein-coding
MEIS1_in_B13ko_peak_1762	chr7	46261821	46261821	+	12.5905	NA	Intergenic	MER11B|LTR|ERVK	-340549	NM_001013398	3486	Hs.450230	NM_000598	ENSG00000146674	IGFBP3	BP-53|IBP3	insulin like growth factor binding protein 3	protein-coding
MEIS1_in_B13ko_peak_710	chr14_KI270722v1_random	182020	182020	+	12.5408	NA	NA	LTR13|LTR|ERVK	NA	NA
MEIS1_in_B13ko_peak_284	chr1	229135005	229135005	+	12.5293	NA	Intergenic	THE1C-int|LTR|ERVL-MaLR	39796	NR_039659	100616234		NR_039659	ENSG00000283468	MIR4454	-	microRNA 4454	ncRNA
MEIS1_in_B13ko_peak_1310	chr3	18988130	18988130	+	12.4988	NA	Intergenic	Intergenic	-160395	NM_144633	131096	Hs.475656	NM_144633	ENSG00000183960	KCNH8	ELK|ELK1|Kv12.1|elk3	potassium voltage-gated channel subfamily H member 8	protein-coding
MEIS1_in_B13ko_peak_1588	chr5	176036774	176036774	+	12.4784	NA	Intergenic	REP522|Satellite|telo	25281	NR_103794	100996385	Hs.382347	NR_103794	ENSG00000248469	LOC100996385	-	uncharacterized LOC100996385	ncRNA
MEIS1_in_B13ko_peak_133	chr1	149840970	149840970	+	12.4784	NA	exon (NM_001005464, exon 1 of 1)	exon (NM_001005464, exon 1 of 1)	223	NM_001005464	333932	Hs.647745	NM_001005464	ENSG00000203852	HIST2H3A	H3/n|H3/o	histone cluster 2 H3 family member a	protein-coding
MEIS1_in_B13ko_peak_1233	chr21	39313849	39313849	+	12.4734	NA	promoter-TSS (NM_018963)	promoter-TSS (NM_018963)	-58	NR_111942	103091865	Hs.190548	NR_111942	ENSG00000255568	BRWD1-AS2	BRWD1-IT2|C21orf87|NCRNA00257	BRWD1 antisense RNA 2	ncRNA
MEIS1_in_B13ko_peak_1643	chr6	27230563	27230563	+	12.4352	NA	Intergenic	tRNA-Leu-TTA|tRNA|tRNA	-17160	NM_005865	10279	Hs.274407	NM_005865	ENSG00000112812	PRSS16	TSSP	serine protease 16	protein-coding
MEIS1_in_B13ko_peak_6	chr1	1290079	1290079	+	12.4091	NA	intron (NM_001130413, intron 12 of 17)	CpG-77	6091	NR_106784	102465434		NR_106784	ENSG00000278073	MIR6726	hsa-mir-6726	microRNA 6726	ncRNA
MEIS1_in_B13ko_peak_1117	chr2	112542485	112542485	+	12.4091	NA	promoter-TSS (NR_136321)	promoter-TSS (NR_136321)	-273	NR_136321	105373562	Hs.599548	NR_136321		LOC105373562	-	uncharacterized LOC105373562	ncRNA
MEIS1_in_B13ko_peak_644	chr13	99182621	99182621	+	12.4091	NA	Intergenic	MER4-int|LTR|ERV1	-17804	NM_001144072	337867	Hs.508545	NM_177967	ENSG00000134882	UBAC2	PHGDHL1	UBA domain containing 2	protein-coding
MEIS1_in_B13ko_peak_1957	chr9	61826358	61826358	+	12.3601	NA	Intergenic	LTR76|LTR|ERV1	-27726	NR_027421	100132948	Hs.645763	NM_001024942	ENSG00000154537	FAM27C	FAM27A|FAM27A1|FAM27A3|bA7G23.5	family with sequence similarity 27 member C	ncRNA
MEIS1_in_B13ko_peak_490	chr12	41946331	41946331	+	12.3544	NA	Intergenic	THE1D-int|LTR|ERVL-MaLR	182142	NR_135040	101927038	Hs.98588	NR_135040	ENSG00000257784	LINC02400	-	long intergenic non-protein coding RNA 2400	ncRNA
MEIS1_in_B13ko_peak_151	chr1	151166013	151166013	+	12.3272	NA	promoter-TSS (NM_212551)	promoter-TSS (NM_212551)	-9	NM_001204856	79005	Hs.732060	NM_024041	ENSG00000163156	SCNM1	-	sodium channel modifier 1	protein-coding
MEIS1_in_B13ko_peak_228	chr1	186523909	186523909	+	12.2936	NA	Intergenic	THE1D-int|LTR|ERVL-MaLR	-62801	NM_002597	5132	Hs.654381	NM_002597	ENSG00000116703	PDC	MEKA|PHD|PhLOP|PhLP	phosducin	protein-coding
MEIS1_in_B13ko_peak_1335	chr3	82377080	82377080	+	12.2936	NA	Intergenic	MER57-int|LTR|ERV1	-615281	NM_000158	2632	Hs.436062	NM_000158	ENSG00000114480	GBE1	APBD|GBE|GSD4	1,4-alpha-glucan branching enzyme 1	protein-coding
MEIS1_in_B13ko_peak_222	chr1	182615181	182615181	+	12.2936	NA	promoter-TSS (NR_036490)	promoter-TSS (NR_036490)	41	NR_036490	284648	Hs.253475	NR_036490	ENSG00000261504	LINC01686	-	long intergenic non-protein coding RNA 1686	ncRNA
MEIS1_in_B13ko_peak_893	chr17	58249860	58249860	+	12.2621	NA	intron (NM_001160102, intron 4 of 10)	CpG-11471	11434	NR_027647	4025	Hs.234742	NM_006151	ENSG00000167419	LPO	SPO	lactoperoxidase	protein-coding
MEIS1_in_B13ko_peak_854	chr17	27089111	27089111	+	12.2621	NA	non-coding (NR_135673, exon 1 of 4)	non-coding (NR_135673, exon 1 of 4)	130	NR_135673	105371703	Hs.649918	NR_135673		LOC105371703	-	uncharacterized LOC105371703	ncRNA
MEIS1_in_B13ko_peak_858	chr17	32429809	32429809	+	12.2621	NA	Intergenic	MSTA-int|LTR|ERVL-MaLR	-14654	NM_001270482	5717	Hs.443379	NM_002815	ENSG00000108671	PSMD11	Rpn6|S9|p44.5	proteasome 26S subunit, non-ATPase 11	protein-coding
MEIS1_in_B13ko_peak_645	chr13	99677671	99677671	+	12.2621	NA	intron (NR_104592, intron 1 of 9)	intron (NR_104592, intron 1 of 9)	13300	NR_046526	100874063	Hs.577064	NR_046526	ENSG00000227659	CLYBL-AS2	-	CLYBL antisense RNA 2	ncRNA
MEIS1_in_B13ko_peak_1053	chr19	53520778	53520778	+	12.2621	NA	promoter-TSS (NM_018555)	promoter-TSS (NM_018555)	-145	NM_018555	55422	Hs.185674	NM_018555	ENSG00000130844	ZNF331	RITA|ZNF361|ZNF463	zinc finger protein 331	protein-coding
MEIS1_in_B13ko_peak_404	chr11	64271360	64271360	+	12.2621	NA	intron (NM_004322, intron 2 of 2)	intron (NM_004322, intron 2 of 2)	-12979	NM_001170726	56834	Hs.523763	NM_020155	ENSG00000173264	GPR137	C11orf4|GPR137A|TM7SF1L1	G protein-coupled receptor 137	protein-coding
MEIS1_in_B13ko_peak_981	chr19	4769682	4769682	+	12.2621	NA	promoter-TSS (NR_029607)	promoter-TSS (NR_029607)	577	NR_027148	284424	Hs.326728	NM_174947	ENSG00000176840	MIR7-3HG	C19orf30|Huh7|LINC00306|NCRNA00306|PGSF1|uc002mbe.2	MIR7-3 host gene	ncRNA
MEIS1_in_B13ko_peak_1142	chr2	237291629	237291629	+	12.2621	NA	Intergenic	Intergenic	122578	NM_057167	1293	Hs.233240	NM_004369	ENSG00000163359	COL6A3	BTHLM1|DYT27|UCMD1	collagen type VI alpha 3 chain	protein-coding
MEIS1_in_B13ko_peak_909	chr17	75033911	75033911	+	12.2621	NA	intron (NR_110835, intron 1 of 7)	tRNA-Arg-AGG|tRNA|tRNA	1344	NR_110835	23510	Hs.514468	NM_015353	ENSG00000180901	KCTD2	-	potassium channel tetramerization domain containing 2	protein-coding
MEIS1_in_B13ko_peak_933	chr18	12060197	12060197	+	12.2621	NA	Intergenic	REP522|Satellite|telo	-33652	NM_001277333	342850	Hs.448906	NM_001277333	ENSG00000181626	ANKRD62	DKFZp779B1634	ankyrin repeat domain 62	protein-coding
MEIS1_in_B13ko_peak_331	chr10	37322682	37322682	+	12.2621	NA	intron (NR_104061, intron 3 of 4)	HUERS-P3-int|LTR|ERV1	13496	NR_104061	101929520	Hs.144151	NR_104061	ENSG00000235687	LINC00993	-	long intergenic non-protein coding RNA 993	ncRNA
MEIS1_in_B13ko_peak_1901	chr8	65395613	65395613	+	12.2621	NA	Intergenic	L2a|LINE|L2	167053	NR_033893	286186	Hs.449427	NR_033893	ENSG00000254081	LINC01299	-	long intergenic non-protein coding RNA 1299	ncRNA
MEIS1_in_B13ko_peak_1694	chr6	131628286	131628286	+	12.2621	NA	promoter-TSS (NM_015979)	promoter-TSS (NM_015979)	-47	NM_001270522	9439	Hs.29679	NM_004830	ENSG00000112282	MED23	ARC130|CRSP130|CRSP133|CRSP3|DRIP130|MRT18|SUR-2|SUR2	mediator complex subunit 23	protein-coding
MEIS1_in_B13ko_peak_725	chr15	45198633	45198633	+	12.2621	NA	intron (NM_138356, intron 2 of 7)	tRNA-His-CAY_|tRNA|tRNA	2542	NM_138356	90525	Hs.310399	NM_138356	ENSG00000138606	SHF	-	Src homology 2 domain containing F	protein-coding
MEIS1_in_B13ko_peak_1664	chr6	46893863	46893863	+	12.2621	NA	intron (NM_015234, intron 3 of 20)	intron (NM_015234, intron 3 of 20)	-9608	NR_110658	101926962	Hs.680113	NR_110658		LOC101926962	-	uncharacterized LOC101926962	ncRNA
MEIS1_in_B13ko_peak_1676	chr6	82931251	82931251	+	12.2621	NA	intron (NM_198920, intron 9 of 9)	THE1C-int|LTR|ERVL-MaLR	134590	NM_001304437	90025	Hs.148609	NM_198920	ENSG00000118420	UBE3D	C6orf157|H10BH|UBE2CBP|YJR141W	ubiquitin protein ligase E3D	protein-coding
MEIS1_in_B13ko_peak_898	chr17	60433224	60433224	+	12.2621	NA	Intergenic	THE1B-int|LTR|ERVL-MaLR	10720	NM_181707	124773	Hs.129312	NM_181707	ENSG00000141371	C17orf64	-	chromosome 17 open reading frame 64	protein-coding
MEIS1_in_B13ko_peak_26	chr1	17301962	17301962	+	12.2621	NA	Intergenic	LTR14A|LTR|ERVK	-6233	NM_012387	23569	Hs.522969	NM_012387	ENSG00000159339	PADI4	PAD|PAD4|PADI5|PDI4|PDI5	peptidyl arginine deiminase 4	protein-coding
MEIS1_in_B13ko_peak_42	chr1	29379615	29379615	+	12.2621	NA	Intergenic	L1MA4|LINE|L1	-29501	NR_110758	101928460	Hs.434659	NR_110758	ENSG00000230523	LINC01756	-	long intergenic non-protein coding RNA 1756	ncRNA
MEIS1_in_B13ko_peak_855	chr17	28262328	28262328	+	12.2621	NA	Intergenic	MER11B|LTR|ERVK	14884	NR_002181	23614	Hs.744962	NR_002181	ENSG00000265060	PPY2P	PPY2	pancreatic polypeptide 2, pseudogene	pseudo
MEIS1_in_B13ko_peak_1745	chr7	29577684	29577684	+	12.2621	NA	Intergenic	THE1D-int|LTR|ERVL-MaLR	12151	NM_001329997	222171	Hs.91109	NM_175887	ENSG00000176532	PRR15	-	proline rich 15	protein-coding
MEIS1_in_B13ko_peak_1460	chr4	33635157	33635157	+	12.2621	NA	Intergenic	THE1D-int|LTR|ERVL-MaLR	404736	NR_125902	101928622	Hs.631687	NR_125902	ENSG00000250954	LOC101928622	-	uncharacterized LOC101928622	ncRNA
MEIS1_in_B13ko_peak_1766	chr7	51559474	51559474	+	12.2621	NA	Intergenic	THE1C-int|LTR|ERVL-MaLR	-242613	NM_015198	23242	Hs.99141	NM_015198	ENSG00000106078	COBL	-	cordon-bleu WH2 repeat protein	protein-coding
MEIS1_in_B13ko_peak_1499	chr4	128265755	128265755	+	12.2621	NA	Intergenic	MER11B|LTR|ERVK	23074	NM_006320	10424	Hs.507910	NM_006320	ENSG00000164040	PGRMC2	DG6|PMBP	progesterone receptor membrane component 2	protein-coding
MEIS1_in_B13ko_peak_459	chr12	6943994	6943994	+	12.2621	NA	TTS (NR_023317)	TTS (NR_023317)	177	NM_001301837	113246	Hs.405913	NM_138425	ENSG00000111678	C12orf57	C10|GRCC10	chromosome 12 open reading frame 57	protein-coding
MEIS1_in_B13ko_peak_1992	chr9	134165531	134165531	+	12.2621	NA	promoter-TSS (NR_023344)	promoter-TSS (NR_023344)	-967	NR_023344	100151684	Hs.545589	NR_023344	ENSG00000221676	RNU6ATAC	RNU6ATAC1|U6ATAC	RNA, U6atac small nuclear (U12-dependent splicing)	snRNA
MEIS1_in_B13ko_peak_1115	chr2	111359312	111359312	+	12.2621	NA	intron (NR_136165, intron 1 of 3)	MSTA-int|LTR|ERVL-MaLR	-38221	NR_039634	100616499		NR_039634	ENSG00000265507	MIR4435-1	mir-4435-1	microRNA 4435-1	ncRNA
MEIS1_in_B13ko_peak_1042	chr19	49580688	49580688	+	12.2621	NA	promoter-TSS (NM_001270960)	promoter-TSS (NM_001270960)	-116	NM_001270960	51070	Hs.7236	NM_015953	ENSG00000142546	NOSIP	CGI-25	nitric oxide synthase interacting protein	protein-coding
MEIS1_in_B13ko_peak_625	chr13	45929112	45929112	+	12.2621	NA	Intergenic	MER20B|DNA|hAT-Charlie	-77401	NM_198849	283514	Hs.368483	NM_198849	ENSG00000215475	SIAH3	-	siah E3 ubiquitin protein ligase family member 3	protein-coding
MEIS1_in_B13ko_peak_1615	chr6	9261333	9261333	+	12.2621	NA	Intergenic	THE1C-int|LTR|ERVL-MaLR	609124	NR_004855	728655	Hs.214343	NR_004855		HULC	HCCAT1|LINC00078|NCRNA00078	hepatocellular carcinoma up-regulated long non-coding RNA	ncRNA
MEIS1_in_B13ko_peak_175	chr1	156741265	156741265	+	12.2621	NA	promoter-TSS (NM_145729)	promoter-TSS (NM_145729)	-134	NM_145729	79590	Hs.418233	NM_024540	ENSG00000143314	MRPL24	L24mt|MRP-L18|MRP-L24	mitochondrial ribosomal protein L24	protein-coding
MEIS1_in_B13ko_peak_1902	chr8	66113426	66113426	+	12.2621	NA	Intergenic	tRNA-Tyr-TAC|tRNA|tRNA	-13617	NM_184087	84675	Hs.85524	NM_033058	ENSG00000147573	TRIM55	MURF-2|RNF29|muRF2	tripartite motif containing 55	protein-coding
MEIS1_in_B13ko_peak_1156	chr20	33737206	33737206	+	12.2621	NA	intron (NR_104259, intron 1 of 13)	LTR8A|LTR|ERV1	5446	NM_001282933	84905	Hs.516989	NM_032819	ENSG00000131061	ZNF341	-	zinc finger protein 341	protein-coding
MEIS1_in_B13ko_peak_1699	chr6	140020410	140020410	+	12.2621	NA	intron (NR_121623, intron 1 of 1)	MSTA-int|LTR|ERVL-MaLR	-29149	NR_121624	103352541	Hs.582647	NR_121624		LOC103352541	-	uncharacterized LOC103352541	ncRNA
MEIS1_in_B13ko_peak_386	chr11	43644174	43644174	+	12.2077	NA	Intergenic	Intergenic	-36419	NM_016142	51144	Hs.132513	NM_016142	ENSG00000149084	HSD17B12	KAR|SDR12C1	hydroxysteroid 17-beta dehydrogenase 12	protein-coding
MEIS1_in_B13ko_peak_807	chr16	79600886	79600886	+	12.1889	NA	promoter-TSS (NM_005360)	promoter-TSS (NM_005360)	-161	NM_005360	4094	Hs.134859	NM_005360	ENSG00000178573	MAF	AYGRP|CCA4|CTRCT21|c-MAF	MAF bZIP transcription factor	protein-coding
MEIS1_in_B13ko_peak_988	chr19	7500921	7500921	+	12.1662	NA	exon (NM_198534, exon 2 of 9)	exon (NM_198534, exon 2 of 9)	3362	NM_198534	374877	Hs.631862	NM_198534	ENSG00000198723	TEX45	C19orf45	testis expressed 45	protein-coding
MEIS1_in_B13ko_peak_950	chr18	65751079	65751079	+	12.1657	NA	5' UTR (NM_001317214, exon 1 of 11)	5' UTR (NM_001317214, exon 1 of 11)	427	NM_001317214	1005	Hs.541003	NM_004361	ENSG00000081138	CDH7	CDH7L1	cadherin 7	protein-coding
MEIS1_in_B13ko_peak_176	chr1	156767186	156767186	+	12.1511	NA	promoter-TSS (NM_005973)	promoter-TSS (NM_005973)	-296	NM_005973	5546	Hs.516948	NM_005973	ENSG00000143294	PRCC	RCCP1|TPRC	papillary renal cell carcinoma (translocation-associated)	protein-coding
MEIS1_in_B13ko_peak_785	chr16	21515638	21515638	+	12.1511	NA	Intergenic	LTR22B|LTR|ERVK	4806	NR_002594	387254	Hs.448808	NR_002594		SLC7A5P2	IMAA|MMAA	solute carrier family 7 member 5 pseudogene 2	pseudo
MEIS1_in_B13ko_peak_1388	chr3	149452224	149452224	+	12.1461	NA	Intergenic	MSTA-int|LTR|ERVL-MaLR	-22357	NM_004617	7104	Hs.133527	NM_004617	ENSG00000169903	TM4SF4	ILTMP|il-TMP	transmembrane 4 L six family member 4	protein-coding
MEIS1_in_B13ko_peak_1176	chr21	6371886	6371886	+	12.1356	NA	Intergenic	Intergenic	88196	NM_001321072	875	Hs.533013	NM_000071	ENSG00000160200	CBS	HIP4	cystathionine-beta-synthase	protein-coding
MEIS1_in_B13ko_peak_1522	chr5	11725143	11725143	+	12.1356	NA	intron (NR_109988, intron 2 of 21)	intron (NR_109988, intron 2 of 21)	-136226	NM_001288716	1501	Hs.314543	NM_001332	ENSG00000169862	CTNND2	GT24|NPRAP	catenin delta 2	protein-coding
MEIS1_in_B13ko_peak_1407	chr3	162059542	162059542	+	12.0396	NA	Intergenic	THE1D-int|LTR|ERVL-MaLR	562734	NM_001080440	131149	Hs.585021	NM_001080440	ENSG00000182447	OTOL1	C1QTNF15|C1QTNF16	otolin 1	protein-coding
MEIS1_in_B13ko_peak_1806	chr7	97973481	97973481	+	11.9925	NA	Intergenic	MER51E|LTR|ERV1	-1155	NR_002822	389538	Hs.655977	NR_002822		CCZ1P-OR7E38P	-	CCZ1P-OR7E38P readthrough	pseudo
MEIS1_in_B13ko_peak_545	chr12	91001561	91001561	+	11.934	NA	intron (NM_004950, intron 2 of 6)	intron (NM_004950, intron 2 of 6)	3465	NM_004950	1833	Hs.435680	NM_004950	ENSG00000083782	EPYC	DSPG3|PGLB|Pg-Lb|SLRR3B	epiphycan	protein-coding
MEIS1_in_B13ko_peak_1529	chr5	42319756	42319756	+	11.9244	NA	Intergenic	MER11C|LTR|ERVK	-104019	NM_000163	2690	Hs.125180	NM_000163	ENSG00000112964	GHR	GHBP|GHIP	growth hormone receptor	protein-coding
MEIS1_in_B13ko_peak_597	chr12	131044941	131044941	+	11.9244	NA	intron (NM_001330497, intron 14 of 25)	CpG	-50965	NR_131951	105755954	Hs.677534	NR_131950		ADGRD1-AS1	LACAT8	ADGRD1 antisense RNA 1	ncRNA
MEIS1_in_B13ko_peak_51	chr1	44721719	44721719	+	11.9244	NA	TTS (NR_002753)	TTS (NR_002753)	182	NR_002753	26828		NR_002753	ENSG00000199377	RNU5F-1	RNU5F|U5F	RNA, U5F small nuclear 1	snRNA
MEIS1_in_B13ko_peak_1102	chr2	74120366	74120366	+	11.9244	NA	Intergenic	CpG	27546	NM_001035505	388962	Hs.61472	NM_212552	ENSG00000163170	BOLA3	MMDS2	bolA family member 3	protein-coding
MEIS1_in_B13ko_peak_598	chr12	131397708	131397708	+	11.9244	NA	Intergenic	THE1D-int|LTR|ERVL-MaLR	50238	NR_103736	338797	Hs.592007	NM_001025466		LINC02370	-	long intergenic non-protein coding RNA 2370	ncRNA
MEIS1_in_B13ko_peak_634	chr13	70203832	70203832	+	11.8802	NA	Intergenic	LTR18A|LTR|ERVL	-95339	NM_020866	57626	Hs.508201	NM_020866	ENSG00000150361	KLHL1	MRP2	kelch like family member 1	protein-coding
MEIS1_in_B13ko_peak_595	chr12	126069775	126069775	+	11.8623	NA	Intergenic	LTR55|LTR|ERVL?	-26217	NR_110053	101927464	Hs.443932	NR_110053	ENSG00000284848	LINC02359	-	long intergenic non-protein coding RNA 2359	ncRNA
MEIS1_in_B13ko_peak_173	chr1	156616669	156616669	+	11.8509	NA	intron (NR_135113, intron 1 of 1)	intron (NR_135113, intron 1 of 1)	-2625	NM_021817	60484	Hs.410719	NM_021817	ENSG00000132702	HAPLN2	BRAL1	hyaluronan and proteoglycan link protein 2	protein-coding
MEIS1_in_B13ko_peak_1501	chr4	134196890	134196890	+	11.8458	NA	3' UTR (NM_001114734, exon 2 of 2)	3' UTR (NM_001114734, exon 2 of 2)	4858	NM_001114734	132430	Hs.49889	NM_001114734	ENSG00000254535	PABPC4L	-	poly(A) binding protein cytoplasmic 4 like	protein-coding
MEIS1_in_B13ko_peak_979	chr19	4724092	4724092	+	11.8458	NA	promoter-TSS (NM_139159)	promoter-TSS (NM_139159)	-249	NM_139159	91039	Hs.515081	NM_139159	ENSG00000142002	DPP9	DP9|DPLP9|DPRP-2|DPRP2	dipeptidyl peptidase 9	protein-coding
MEIS1_in_B13ko_peak_1796	chr7	87825475	87825475	+	11.7954	NA	intron (NM_138290, intron 11 of 11)	THE1B-int|LTR|ERVL-MaLR	-50754	NM_001318060	10926	Hs.485380	NM_006716	ENSG00000006634	DBF4	ASK|CHIF|DBF4A|ZDBF1	DBF4 zinc finger	protein-coding
MEIS1_in_B13ko_peak_1175	chr21	6371091	6371091	+	11.7651	NA	Intergenic	Intergenic	88991	NM_001321072	875	Hs.533013	NM_000071	ENSG00000160200	CBS	HIP4	cystathionine-beta-synthase	protein-coding
MEIS1_in_B13ko_peak_1831	chr7	114087637	114087637	+	11.7502	NA	intron (NR_033766, intron 1 of 19)	CpG-26317	1327	NR_033766	93986	Hs.282787	NM_014491	ENSG00000128573	FOXP2	CAGH44|SPCH1|TNRC10	forkhead box P2	protein-coding
MEIS1_in_B13ko_peak_210	chr1	171344297	171344297	+	11.7015	NA	Intergenic	Intergenic	5401	NR_002719	7151	Hs.661092	NR_002719		TOP1P1	-	DNA topoisomerase I pseudogene 1	pseudo
MEIS1_in_B13ko_peak_1490	chr4	101953257	101953257	+	11.6813	NA	intron (NM_001127507, intron 6 of 15)	intron (NM_001127507, intron 6 of 15)	139431	NM_001083907	55024	Hs.480400	NM_017935	ENSG00000153064	BANK1	BANK	B cell scaffold protein with ankyrin repeats 1	protein-coding
MEIS1_in_B13ko_peak_203	chr1	167697934	167697934	+	11.6737	NA	intron (NM_001322923, intron 5 of 5)	intron (NM_001322923, intron 5 of 5)	-24016	NM_024569	9019	Hs.493919	NM_003953	ENSG00000197965	MPZL1	MPZL1b|PZR|PZR1b|PZRa|PZRb	myelin protein zero like 1	protein-coding
MEIS1_in_B13ko_peak_1352	chr3	119282778	119282778	+	11.6636	NA	intron (NR_046574, intron 3 of 3)	MSTA-int|LTR|ERVL-MaLR	-11595	NM_020754	57514	Hs.668218	NM_020754	ENSG00000031081	ARHGAP31	AOS1|CDGAP	Rho GTPase activating protein 31	protein-coding
MEIS1_in_B13ko_peak_264	chr1	213051174	213051174	+	11.6238	NA	promoter-TSS (NM_001287219)	promoter-TSS (NM_001287219)	-59	NM_001287219	26750	Hs.591416	NM_012424	ENSG00000136643	RPS6KC1	RPK118|RSKL1|S6K-delta-1|S6PKh1|humS6PKh1	ribosomal protein S6 kinase C1	protein-coding
MEIS1_in_B13ko_peak_631	chr13	62721994	62721994	+	11.6175	NA	intron (NR_047029, intron 5 of 7)	MLT1E|LTR|ERVL-MaLR	74698	NR_047029	100874176	Hs.402083	NR_047029		LINC00448	-	long intergenic non-protein coding RNA 448	ncRNA
MEIS1_in_B13ko_peak_209	chr1	169486160	169486160	+	11.6175	NA	promoter-TSS (NM_001319667)	promoter-TSS (NM_001319667)	-190	NM_001319667	10560	Hs.30246	NM_006996	ENSG00000117479	SLC19A2	TC1|THMD1|THT1|THTR1|TRMA	solute carrier family 19 member 2	protein-coding
MEIS1_in_B13ko_peak_1139	chr2	231786452	231786452	+	11.5723	NA	promoter-TSS (NM_001282950)	promoter-TSS (NM_001282950)	69	NM_001308381	64708	Hs.335061	NM_022730	ENSG00000144524	COPS7B	CSN7B|SGN7b	COP9 signalosome subunit 7B	protein-coding
MEIS1_in_B13ko_peak_1613	chr6	1524149	1524149	+	11.5723	NA	Intergenic	CpG	-81382	NR_125804	101927703	Hs.607964	NR_125804		FOXCUT	LINC01379|TCONS_00011636	FOXC1 upstream transcript (non-protein coding)	ncRNA
MEIS1_in_B13ko_peak_808	chr16	80718570	80718570	+	11.5723	NA	intron (NM_152342, intron 1 of 6)	intron (NM_152342, intron 1 of 6)	85708	NM_152342	124359	Hs.60257	NM_152342	ENSG00000166446	CDYL2	PCCP1	chromodomain Y like 2	protein-coding
MEIS1_in_B13ko_peak_477	chr12	26755559	26755559	+	11.5723	NA	intron (NM_002223, intron 2 of 56)	MER41-int|LTR|ERV1	77639	NM_002223	3709	Hs.512235	NM_002223	ENSG00000123104	ITPR2	ANHD|CFAP48|INSP3R2|IP3R2	inositol 1,4,5-trisphosphate receptor type 2	protein-coding
MEIS1_in_B13ko_peak_685	chr14	65102818	65102818	+	11.5723	NA	promoter-TSS (NM_145114)	promoter-TSS (NM_145114)	-123	NR_073137	4149	Hs.285354	NM_002382	ENSG00000125952	MAX	bHLHd4	MYC associated factor X	protein-coding
MEIS1_in_B13ko_peak_659	chr14	20631184	20631184	+	11.5723	NA	Intergenic	tRNA-Thr-ACA|tRNA|tRNA	10507	NM_001001968	341799	Hs.513132	NM_001001968	ENSG00000181803	OR6S1	OR14-37|OR6S1Q	olfactory receptor family 6 subfamily S member 1	protein-coding
MEIS1_in_B13ko_peak_1651	chr6	27592868	27592868	+	11.5723	NA	Intergenic	tRNA-Met-i|tRNA|tRNA	-101167	NR_038294	100507173	Hs.635987	NR_038292	ENSG00000281706	LINC01012	-	long intergenic non-protein coding RNA 1012	ncRNA
MEIS1_in_B13ko_peak_256	chr1	205495677	205495677	+	11.5723	NA	Intergenic	Intergenic	-8879	NM_002596	5129	Hs.445402	NM_002596	ENSG00000117266	CDK18	PCTAIRE|PCTAIRE3|PCTK3	cyclin dependent kinase 18	protein-coding
MEIS1_in_B13ko_peak_1290	chr22_KI270733v1_random	152389	152389	+	11.5716	NA	Intergenic	Intergenic	-17826	NR_037458
MEIS1_in_B13ko_peak_1343	chr3	99159197	99159197	+	11.5557	NA	Intergenic	MSTA-int|LTR|ERVL-MaLR	-257508	NM_080927	131566	Hs.203691	NM_080927	ENSG00000057019	DCBLD2	CLCP1|ESDN	discoidin, CUB and LCCL domain containing 2	protein-coding
MEIS1_in_B13ko_peak_1810	chr7	99531480	99531480	+	11.5134	NA	exon (NM_001318083, exon 5 of 5)	exon (NM_001318083, exon 5 of 5)	20654	NM_145111	221786	Hs.596587	NM_145111	ENSG00000221909	FAM200A	C7orf38	family with sequence similarity 200 member A	protein-coding
MEIS1_in_B13ko_peak_792	chr16	29613880	29613880	+	11.484	NA	promoter-TSS (NR_135317)	promoter-TSS (NR_135317)	-163	NR_135317	440354	Hs.552700	NR_002473		SMG1P2	-	SMG1 pseudogene 2	pseudo
MEIS1_in_B13ko_peak_1828	chr7	110283256	110283256	+	11.467	NA	Intergenic	Intergenic	-323043	NR_003024	442720	Hs.530096	NR_003024	ENSG00000237064	EIF3IP1	RG208K23	eukaryotic translation initiation factor 3 subunit I pseudogene 1	pseudo
MEIS1_in_B13ko_peak_191	chr1	161458126	161458126	+	11.4364	NA	Intergenic	CpG	-47289	NM_021642	2212	Hs.352642	NM_021642	ENSG00000143226	FCGR2A	CD32|CD32A|CDw32|FCG2|FCGR2|FCGR2A1|FcGR|IGFR2	Fc fragment of IgG receptor IIa	protein-coding
MEIS1_in_B13ko_peak_1331	chr3	71753936	71753936	+	11.3943	NA	promoter-TSS (NM_001282886)	promoter-TSS (NM_001282886)	212	NM_018971	2850	Hs.591653	NM_018971	ENSG00000170837	GPR27	SREB1	G protein-coupled receptor 27	protein-coding
MEIS1_in_B13ko_peak_1764	chr7	46527568	46527568	+	11.3804	NA	Intergenic	MER41-int|LTR|ERV1	169554	NR_134575	730338	Hs.640207	NR_134575	ENSG00000233539	LOC730338	-	uncharacterized LOC730338	ncRNA
MEIS1_in_B13ko_peak_491	chr12	45990844	45990844	+	11.3804	NA	promoter-TSS (NM_004719)	promoter-TSS (NM_004719)	-226	NM_004719	9169	Hs.210367	NM_004719	ENSG00000139218	SCAF11	CASP11|SFRS2IP|SIP1|SRRP129|SRSF2IP	SR-related CTD associated factor 11	protein-coding
MEIS1_in_B13ko_peak_1827	chr7	108556852	108556852	+	11.3804	NA	Intergenic	MSTA-int|LTR|ERVL-MaLR	12601	NM_001287598	168451	Hs.707689	NM_182529	ENSG00000177683	THAP5	-	THAP domain containing 5	protein-coding
MEIS1_in_B13ko_peak_896	chr17	59565450	59565450	+	11.3496	NA	promoter-TSS (NM_001166301)	promoter-TSS (NM_001166301)	-75	NM_024612	79665	Hs.29403	NM_024612	ENSG00000108406	DHX40	ARG147|DDX40|PAD	DEAH-box helicase 40	protein-coding
MEIS1_in_B13ko_peak_381	chr11	27090752	27090752	+	11.3496	NA	intron (NR_125766, intron 3 of 4)	MER11A|LTR|ERVK	49790	NM_003986	8424	Hs.591996	NM_003986	ENSG00000129151	BBOX1	BBH|BBOX|G-BBH|gamma-BBH	gamma-butyrobetaine hydroxylase 1	protein-coding
MEIS1_in_B13ko_peak_692	chr14	70944032	70944032	+	11.3496	NA	intron (NM_014982, intron 1 of 35)	THE1C-int|LTR|ERVL-MaLR	36627	NM_001308160	22990	Hs.446559	NM_014982	ENSG00000100731	PCNX1	PCNX|PCNXL1|pecanex	pecanex homolog 1	protein-coding
MEIS1_in_B13ko_peak_1032	chr19	46303805	46303805	+	11.3496	NA	intron (NM_152794, intron 1 of 14)	CpG	206	NM_152794	64344	Hs.420830	NM_022462	ENSG00000124440	HIF3A	HIF-3A|HIF3-alpha-1|IPAS|MOP7|PASD7|bHLHe17	hypoxia inducible factor 3 subunit alpha	protein-coding
MEIS1_in_B13ko_peak_1015	chr19	36421613	36421613	+	11.3496	NA	non-coding (NR_033748, exon 1 of 1)	non-coding (NR_033748, exon 1 of 1)	439	NR_033748	644189	Hs.608412	NR_033748		LOC644189	-	acyl-CoA thioesterase 4 pseudogene	pseudo
MEIS1_in_B13ko_peak_746	chr15	81918958	81918958	+	11.3496	NA	Intergenic	THE1D-int|LTR|ERVL-MaLR	127185	NM_032246	84206	Hs.104744	NM_032246	ENSG00000183496	MEX3B	MEX-3B|RKHD3|RNF195	mex-3 RNA binding family member B	protein-coding
MEIS1_in_B13ko_peak_1888	chr8	28401520	28401520	+	11.3496	NA	Intergenic	(GT)n|Simple_repeat|Simple_repeat	-15060	NM_018660	55893	Hs.435535	NM_018660	ENSG00000186918	ZNF395	HDBP-2|HDBP2|HDRF-2|PBF|PRF-1|PRF1|Si-1-8-14	zinc finger protein 395	protein-coding
MEIS1_in_B13ko_peak_62	chr1	75423738	75423738	+	11.3496	NA	intron (NM_001320285, intron 2 of 25)	intron (NM_001320285, intron 2 of 25)	187376	NM_152697	204962	Hs.654821	NM_152697	ENSG00000137968	SLC44A5	CTL5	solute carrier family 44 member 5	protein-coding
MEIS1_in_B13ko_peak_1981	chr9	125571993	125571993	+	11.3496	NA	intron (NM_001006618, intron 5 of 7)	PABL_A-int|LTR|ERV1	135241	NM_001006621	79109	Hs.495138	NM_024117	ENSG00000119487	MAPKAP1	JC310|MIP1|SIN1|SIN1b|SIN1g	mitogen-activated protein kinase associated protein 1	protein-coding
MEIS1_in_B13ko_peak_1582	chr5	160926577	160926577	+	11.3496	NA	Intergenic	Intergenic	12049	NR_027111	285629	Hs.554279	NR_027111	ENSG00000253417	LINC02159	-	long intergenic non-protein coding RNA 2159	ncRNA
MEIS1_in_B13ko_peak_810	chr16	82009168	82009168	+	11.3496	NA	intron (NM_145168, intron 1 of 2)	THE1B-int|LTR|ERVL-MaLR	2320	NM_145168	93517	Hs.87779	NM_145168	ENSG00000184860	SDR42E1	HSPC105	short chain dehydrogenase/reductase family 42E, member 1	protein-coding
MEIS1_in_B13ko_peak_1655	chr6	27684714	27684714	+	11.3496	NA	Intergenic	tRNA-Thr-ACY_|tRNA|tRNA	-9321	NR_038294	100507173	Hs.635987	NR_038292	ENSG00000281706	LINC01012	-	long intergenic non-protein coding RNA 1012	ncRNA
MEIS1_in_B13ko_peak_1922	chr8	121219299	121219299	+	11.3496	NA	Intergenic	THE1D-int|LTR|ERVL-MaLR	-407230	NM_021021	6641	Hs.46701	NM_021021	ENSG00000172164	SNTB1	59-DAP|A1B|BSYN2|DAPA1B|SNT2|SNT2B1|TIP-43	syntrophin beta 1	protein-coding
MEIS1_in_B13ko_peak_330	chr10	35444057	35444057	+	11.3496	NA	intron (NM_001282853, intron 2 of 10)	LTR10C|LTR|ERV1	107183	NM_001282853	219771	Hs.14745	NM_145012	ENSG00000108100	CCNY	C10orf9|CBCP1|CCNX|CFP1	cyclin Y	protein-coding
MEIS1_in_B13ko_peak_1772	chr7	66114855	66114855	+	11.3496	NA	promoter-TSS (NM_001142414)	promoter-TSS (NM_001142414)	37	NM_014478	27297	Hs.300684	NM_014478	ENSG00000241258	CRCP	CGRP-RCP|CGRPRCP|RCP|RCP9|RPC9	CGRP receptor component	protein-coding
MEIS1_in_B13ko_peak_1010	chr19	23091306	23091306	+	11.3496	NA	Intergenic	THE1A-int|LTR|ERVL-MaLR	-25669	NM_001277403	100129543	Hs.427120	NM_001277403	ENSG00000183850	ZNF730	-	zinc finger protein 730	protein-coding
MEIS1_in_B13ko_peak_1872	chr7	154934478	154934478	+	11.3496	NA	intron (NR_024476, intron 2 of 7)	THE1C-int|LTR|ERVL-MaLR	5961	NR_024477	100132707	Hs.586358	NR_024476	ENSG00000214106	PAXIP1-AS2	PAXIP1OS	PAXIP1 antisense RNA 2	ncRNA
MEIS1_in_B13ko_peak_450	chr12	2885447	2885447	+	11.3496	NA	exon (NM_001252499, exon 2 of 3)	exon (NM_001252499, exon 2 of 3)	-5420	NM_001160408	7289	Hs.655333	NM_003324	ENSG00000078246	TULP3	TUBL3	tubby like protein 3	protein-coding
MEIS1_in_B13ko_peak_1713	chr6_GL000255v2_alt	247823	247823	+	11.3496	NA	Intergenic	tRNA-Glu-GAG_|tRNA|tRNA	-2504	NR_135289	414761	Hs.571153	NR_135289		HCG15	HCG16	HLA complex group 15 (non-protein coding)	ncRNA
MEIS1_in_B13ko_peak_648	chr13	111052118	111052118	+	11.3496	NA	Intergenic	Intergenic	-43720	NR_120415	101927802	Hs.559193	NR_120415		LINC00368	-	long intergenic non-protein coding RNA 368	ncRNA
MEIS1_in_B13ko_peak_1891	chr8	37849938	37849938	+	11.3496	NA	promoter-TSS (NM_018310)	promoter-TSS (NM_018310)	-25	NM_018310	55290	Hs.709301	NM_018310	ENSG00000104221	BRF2	BRFU|TFIIIB50	BRF2, RNA polymerase III transcription initiation factor subunit	protein-coding
MEIS1_in_B13ko_peak_1355	chr3	120155061	120155061	+	11.3496	NA	Intergenic	THE1C-int|LTR|ERVL-MaLR	-60644	NM_002093	2932	Hs.445733	NM_002093	ENSG00000082701	GSK3B	-	glycogen synthase kinase 3 beta	protein-coding
MEIS1_in_B13ko_peak_1442	chr3_KI270782v1_alt	99756	99756	+	11.3496	NA	Intergenic	Intergenic	87361	NM_203315	622	Hs.274539	NM_004051	ENSG00000161267	BDH1	BDH|SDR9C1	3-hydroxybutyrate dehydrogenase 1	protein-coding
MEIS1_in_B13ko_peak_1528	chr5	40756040	40756040	+	11.3496	NA	promoter-TSS (NM_012382)	promoter-TSS (NM_012382)	-70	NM_012382	23548	Hs.348915	NM_012382	ENSG00000113638	TTC33	OSRF	tetratricopeptide repeat domain 33	protein-coding
MEIS1_in_B13ko_peak_762	chr16	690460	690460	+	11.3496	NA	promoter-TSS (NM_032259)	promoter-TSS (NM_032259)	-36	NM_032259	84219	Hs.459632	NM_032259	ENSG00000127580	WDR24	C16orf21|JFP7	WD repeat domain 24	protein-coding
MEIS1_in_B13ko_peak_1127	chr2	196799756	196799756	+	11.3496	NA	promoter-TSS (NM_012086)	promoter-TSS (NM_012086)	12	NM_012086	9330	Hs.470996	NM_012086	ENSG00000119041	GTF3C3	TFIIIC102|TFIIICgamma|TFiiiC2-102	general transcription factor IIIC subunit 3	protein-coding
MEIS1_in_B13ko_peak_1016	chr19	37656124	37656124	+	11.3496	NA	promoter-TSS (NM_001320669)	promoter-TSS (NM_001320669)	137	NM_001320668	22835	Hs.668737	NM_014898	ENSG00000120784	ZFP30	ZNF745	ZFP30 zinc finger protein	protein-coding
MEIS1_in_B13ko_peak_1555	chr5	82043087	82043087	+	11.3496	NA	intron (NM_001131028, intron 3 of 8)	MSTA-int|LTR|ERVL-MaLR	71062	NM_031482	83734	Hs.713698	NM_031482	ENSG00000152348	ATG10	APG10|APG10L|pp12616	autophagy related 10	protein-coding
MEIS1_in_B13ko_peak_636	chr13	76959880	76959880	+	11.3496	NA	Intergenic	THE1C-int|LTR|ERVL-MaLR	7391	NM_001258406	730249	Hs.160789	NM_001258406	ENSG00000102794	ACOD1	CAD|IRG1	aconitate decarboxylase 1	protein-coding
MEIS1_in_B13ko_peak_737	chr15	65296193	65296193	+	11.3496	NA	TTS (NR_002756)	TTS (NR_002756)	142	NR_002756	26831		NR_002756	ENSG00000199568	RNU5A-1	RNU5|RNU5A|RNU5C|U5A|U5B1	RNA, U5A small nuclear 1	snRNA
MEIS1_in_B13ko_peak_1609	chr5	181221997	181221997	+	11.3496	NA	TTS (NR_039781)	TTS (NR_039781)	636	NR_039781	100616342		NR_039781	ENSG00000264732	MIR4638	mir-4638	microRNA 4638	ncRNA
MEIS1_in_B13ko_peak_955	chr18	70227611	70227611	+	11.3496	NA	Intergenic	LTR8B|LTR|ERV1	-21885	NM_173630	25914	Hs.654809	NM_173630	ENSG00000176225	RTTN	MSSP	rotatin	protein-coding
MEIS1_in_B13ko_peak_1479	chr4	64453629	64453629	+	11.3496	NA	Intergenic	THE1C-int|LTR|ERVL-MaLR	-44169	NM_001010874	253017	Hs.227752	NM_001010874	ENSG00000205678	TECRL	CPVT3|GPSN2L|SRD5A2L2|TERL	trans-2,3-enoyl-CoA reductase like	protein-coding
MEIS1_in_B13ko_peak_1435	chr3	195319230	195319230	+	11.3496	NA	intron (NM_012287, intron 10 of 22)	THE1D-int|LTR|ERVL-MaLR	-48064	NM_152531	152002	Hs.478741	NM_152531	ENSG00000173950	XXYLT1	C3orf21	xyloside xylosyltransferase 1	protein-coding
MEIS1_in_B13ko_peak_1427	chr3	187740071	187740071	+	11.3496	NA	intron (NM_001706, intron 1 of 9)	CpG	-3574	NM_001130845	604	Hs.478588	NM_001706	ENSG00000113916	BCL6	BCL5|BCL6A|LAZ3|ZBTB27|ZNF51	B cell CLL/lymphoma 6	protein-coding
MEIS1_in_B13ko_peak_887	chr17	49185587	49185587	+	11.3496	NA	Intergenic	THE1B-int|LTR|ERVL-MaLR	23794	NM_031498	2793	Hs.181781	NM_031498	ENSG00000167083	GNGT2	G-GAMMA-8|G-GAMMA-C|GNG8|GNG9|GNGT8	G protein subunit gamma transducin 2	protein-coding
MEIS1_in_B13ko_peak_771	chr16	3157380	3157380	+	11.3496	NA	Intergenic	Intergenic	13089	NR_132322	197350	Hs.434132	NR_132322	ENSG00000228146	CASP16P	CASP16	caspase 16, pseudogene	pseudo
MEIS1_in_B13ko_peak_1575	chr5	140711313	140711313	+	11.3496	NA	promoter-TSS (NR_026703)	promoter-TSS (NR_026703)	37	NR_026703	56664		NR_026703	ENSG00000199990	VTRNA1-1	HVG1|VAULTRC1|VR1|hvg-1|vRNA	vault RNA 1-1	ncRNA
MEIS1_in_B13ko_peak_1273	chr22	45413585	45413585	+	11.3496	NA	promoter-TSS (NM_001291501)	promoter-TSS (NM_001291501)	34	NM_148674	27127	Hs.334176	NM_148674	ENSG00000077935	SMC1B	SMC1BETA|SMC1L2	structural maintenance of chromosomes 1B	protein-coding
MEIS1_in_B13ko_peak_1653	chr6	27668615	27668615	+	11.3496	NA	Intergenic	tRNA-Ile-ATT|tRNA|tRNA	-25420	NR_038294	100507173	Hs.635987	NR_038292	ENSG00000281706	LINC01012	-	long intergenic non-protein coding RNA 1012	ncRNA
MEIS1_in_B13ko_peak_702	chr14	102317115	102317115	+	11.3496	NA	promoter-TSS (NM_001267827)	promoter-TSS (NM_001267827)	-262	NM_001267827	55778	Hs.743359	NM_018335	ENSG00000022976	ZNF839	C14orf131	zinc finger protein 839	protein-coding
MEIS1_in_B13ko_peak_1229	chr21	17808379	17808379	+	11.3496	NA	intron (NM_017447, intron 2 of 4)	MSTA-int|LTR|ERVL-MaLR	11007	NM_001100421	54149	Hs.293811	NM_017447	ENSG00000154642	C21orf91	C21orf14|C21orf38|CSSG1|EURL|YG81	chromosome 21 open reading frame 91	protein-coding
MEIS1_in_B13ko_peak_1982	chr9	125746337	125746337	+	11.3062	NA	promoter-TSS (NR_122032)	promoter-TSS (NR_122032)	-408	NR_122032	51145	Hs.104671	NM_016158		LOC51145	-	uncharacterized LOC51145	ncRNA
MEIS1_in_B13ko_peak_372	chr11	9460985	9460985	+	11.3044	NA	promoter-TSS (NR_036539)	promoter-TSS (NR_036539)	20	NM_001282656	7702	Hs.523471	NM_003442	ENSG00000166478	ZNF143	SBF|STAF|pHZ-1	zinc finger protein 143	protein-coding
MEIS1_in_B13ko_peak_1851	chr7	134896267	134896267	+	11.3044	NA	intron (NM_033140, intron 1 of 11)	LTR10A|LTR|ERV1	4867	NM_033139	800	Hs.490203	NM_004342	ENSG00000122786	CALD1	CDM|H-CAD|HCAD|L-CAD|LCAD|NAG22	caldesmon 1	protein-coding
MEIS1_in_B13ko_peak_604	chr12	132611804	132611804	+	11.3044	NA	Intergenic	MLT1H2|LTR|ERVL-MaLR	-1353	NM_001195520	100507055	Hs.282811	NM_001195520	ENSG00000204583	LRCOL1	-	leucine rich colipase like 1	protein-coding
MEIS1_in_B13ko_peak_283	chr1	228486770	228486770	+	11.2574	NA	promoter-TSS (NM_001010858)	promoter-TSS (NM_001010858)	-597	NM_001010858	149603	Hs.356377	NM_001010858	ENSG00000168159	RNF187	RACO-1|RACO1	ring finger protein 187	protein-coding
MEIS1_in_B13ko_peak_619	chr13	34125117	34125117	+	11.1607	NA	Intergenic	Intergenic	307048	NM_002915	5983	Hs.115474	NM_002915	ENSG00000133119	RFC3	RFC38	replication factor C subunit 3	protein-coding
MEIS1_in_B13ko_peak_1365	chr3	127628972	127628972	+	11.1501	NA	promoter-TSS (NM_015720)	promoter-TSS (NM_015720)	-187	NM_015720	50512	Hs.591290	NM_015720	ENSG00000114631	PODXL2	EG|PODLX2	podocalyxin like 2	protein-coding
MEIS1_in_B13ko_peak_238	chr1	197081587	197081587	+	11.1364	NA	Intergenic	THE1B-int|LTR|ERVL-MaLR	-14320	NM_001994	2165	Hs.435782	NM_001994	ENSG00000143278	F13B	FXIIIB	coagulation factor XIII B chain	protein-coding
MEIS1_in_B13ko_peak_1953	chr9	40992138	40992138	+	11.1328	NA	promoter-TSS (NR_034006)	promoter-TSS (NR_034006)	-124	NR_136306	102725126	Hs.231861	NR_136306		LOC102725126	-	FSHD region gene 1 pseudogene	pseudo
MEIS1_in_B13ko_peak_34	chr1	26693194	26693194	+	11.1268	NA	non-coding (NR_135804, exon 1 of 1)	non-coding (NR_135804, exon 1 of 1)	937	NR_135804	101928728	Hs.128770	NR_135804	ENSG00000260063	LOC101928728	-	uncharacterized LOC101928728	ncRNA
MEIS1_in_B13ko_peak_1751	chr7	38099234	38099234	+	11.0634	NA	Intergenic	THE1D-int|LTR|ERVL-MaLR	-78972	NM_032016	83930	Hs.309753	NM_032016	ENSG00000010270	STARD3NL	MENTHO	STARD3 N-terminal like	protein-coding
MEIS1_in_B13ko_peak_759	chr16	10984	10984	+	11.0634	NA	promoter-TSS (NR_045117)	promoter-TSS (NR_045117)	-571	NR_045117	100287029	Hs.592089	NR_045117	ENSG00000233614	DDX11L10	DDX11L1|DDX11P	DEAD/H-box helicase 11 like 10	pseudo
MEIS1_in_B13ko_peak_1508	chr4	153153382	153153382	+	11.0297	NA	intron (NM_001130067, intron 1 of 11)	CpG	264	NM_001130067	23321	Hs.435711	NM_015271	ENSG00000109654	TRIM2	CMT2R|RNF86	tripartite motif containing 2	protein-coding
MEIS1_in_B13ko_peak_781	chr16	14286003	14286003	+	11.0297	NA	Intergenic	Intergenic	-16285	NR_132983	100129781	Hs.190748	NR_132983		MIR193BHG	-	MIR193B host gene	ncRNA
MEIS1_in_B13ko_peak_1034	chr19	46851097	46851097	+	11.0297	NA	promoter-TSS (NM_001301076)	promoter-TSS (NM_001301076)	-102	NM_001301078	1175	Hs.119591	NM_004069	ENSG00000042753	AP2S1	AP17|CLAPS2|FBH3|FBHOk|HHC3	adaptor related protein complex 2 subunit sigma 1	protein-coding
MEIS1_in_B13ko_peak_646	chr13	106899615	106899615	+	11.0297	NA	Intergenic	Intergenic	245735	NR_047026	100874173	Hs.569297	NR_047026	ENSG00000230156	LINC00443	-	long intergenic non-protein coding RNA 443	ncRNA
MEIS1_in_B13ko_peak_664	chr14	22929762	22929762	+	11.0297	NA	promoter-TSS (NM_001039619)	promoter-TSS (NM_001039619)	153	NR_110002	101926933	Hs.727321	NR_110002	ENSG00000257285	LOC101926933	-	uncharacterized LOC101926933	ncRNA
MEIS1_in_B13ko_peak_628	chr13	48095217	48095217	+	11.0297	NA	promoter-TSS (NM_001270629)	promoter-TSS (NM_001270629)	-76	NM_001270629	29079	Hs.181112	NM_014166	ENSG00000136146	MED4	ARC36|DRIP36|HSPC126|TRAP36|VDRIP	mediator complex subunit 4	protein-coding
MEIS1_in_B13ko_peak_1666	chr6	52995904	52995904	+	11.0297	NA	promoter-TSS (NM_001512)	promoter-TSS (NM_001512)	284	NR_001445	125050		NR_001445	ENSG00000202198	RN7SK	7SK	RNA, 7SK small nuclear	snRNA
MEIS1_in_B13ko_peak_370	chr11	1418101	1418101	+	11.0297	NA	intron (NM_001256630, intron 1 of 19)	intron (NM_001256630, intron 1 of 19)	6949	NM_001256630	9024	Hs.170819	NM_003957	ENSG00000174672	BRSK2	C11orf7|PEN11B|SAD1|SADA|STK29	BR serine/threonine kinase 2	protein-coding
MEIS1_in_B13ko_peak_1001	chr19	13774408	13774408	+	11.0297	NA	promoter-TSS (NM_014047)	promoter-TSS (NM_014047)	-35	NM_014047	28974	Hs.231616	NM_014047	ENSG00000104979	C19orf53	HSPC023|LYDG10	chromosome 19 open reading frame 53	protein-coding
MEIS1_in_B13ko_peak_884	chr17	43938254	43938254	+	11.0297	NA	promoter-TSS (NR_136406)	promoter-TSS (NR_136406)	-7	NR_136406	107546764	Hs.144950	NR_136406	ENSG00000261514	LINC01976	-	long intergenic non-protein coding RNA 1976	ncRNA
MEIS1_in_B13ko_peak_1691	chr6	118574459	118574459	+	11.0297	NA	intron (NM_001042475, intron 2 of 12)	LTR10B2|LTR|ERV1	26196	NM_002667	5350	Hs.170839	NM_002667	ENSG00000198523	PLN	CMD1P|CMH18|PLB	phospholamban	protein-coding
MEIS1_in_B13ko_peak_427	chr11	85628546	85628546	+	11.0297	NA	promoter-TSS (NM_001193537)	promoter-TSS (NM_001193537)	-27	NM_018480	55863	Hs.525063	NM_018480	ENSG00000171204	TMEM126B	HT007	transmembrane protein 126B	protein-coding
MEIS1_in_B13ko_peak_1686	chr6	107228969	107228969	+	11.0297	NA	intron (NM_020381, intron 4 of 7)	Eulor6C|DNA?|DNA?	-114537	NM_001080450	57673	Hs.418045	NM_001080450	ENSG00000178409	BEND3	KIAA1553	BEN domain containing 3	protein-coding
MEIS1_in_B13ko_peak_1642	chr6	27215200	27215200	+	11.0297	NA	Intergenic	tRNA-Arg-CGY_|tRNA|tRNA	-32523	NM_005865	10279	Hs.274407	NM_005865	ENSG00000112812	PRSS16	TSSP	serine protease 16	protein-coding
MEIS1_in_B13ko_peak_396	chr11	59560379	59560379	+	11.0297	NA	Intergenic	tRNA-Lys-AAA|tRNA|tRNA	34779	NR_036120	100422880		NR_036120	ENSG00000264559	MIR3162	mir-3162	microRNA 3162	ncRNA
MEIS1_in_B13ko_peak_795	chr16	30097115	30097115	+	11.0297	NA	promoter-TSS (NM_031477)	promoter-TSS (NM_031477)	685	NR_135192	101928595	Hs.569669	NR_135192		LOC101928595	-	uncharacterized LOC101928595	ncRNA
MEIS1_in_B13ko_peak_1452	chr4	4788796	4788796	+	11.0297	NA	Intergenic	MSTA-int|LTR|ERVL-MaLR	27036	NR_125892	101928279	Hs.586152	NR_125892		LOC101928279	-	uncharacterized LOC101928279	ncRNA
MEIS1_in_B13ko_peak_75	chr1	105982169	105982169	+	11.0297	NA	Intergenic	THE1C-int|LTR|ERVL-MaLR	-363234	NR_125955	101928476	Hs.563856	NR_125954	ENSG00000230768	LINC01676	-	long intergenic non-protein coding RNA 1676	ncRNA
MEIS1_in_B13ko_peak_164	chr1	154936618	154936618	+	11.0002	NA	promoter-TSS (NM_001323011)	promoter-TSS (NM_001323011)	-156	NM_001323011	10654	Hs.30954	NM_006556	ENSG00000163344	PMVK	HUMPMKI|PMK|PMKA|PMKASE|POROK1	phosphomevalonate kinase	protein-coding
MEIS1_in_B13ko_peak_949	chr18	65122535	65122535	+	11.0002	NA	Intergenic	THE1D-int|LTR|ERVL-MaLR	-627717	NM_033646	1005	Hs.541003	NM_004361	ENSG00000081138	CDH7	CDH7L1	cadherin 7	protein-coding
MEIS1_in_B13ko_peak_1612	chr6	148584	148584	+	10.9982	NA	promoter-TSS (NR_109817)	promoter-TSS (NR_109817)	-425	NR_109817	441123		NR_109817		LINC00266-3	C6orf88|NCRNA00266-3|NCRNA00266C|dJ24O22.2	long intergenic non-protein coding RNA 266-3	ncRNA
MEIS1_in_B13ko_peak_336	chr10	55248976	55248976	+	10.9982	NA	Intergenic	L1MC|LINE|L1	-350014	NM_001190478	100463289	Hs.727204	NM_001190478	ENSG00000249860	MTRNR2L5	HN5	MT-RNR2 like 5	protein-coding
MEIS1_in_B13ko_peak_2012	chrUn_GL000219v1	99854	99854	+	10.9859	NA	promoter-TSS (NR_027436)	promoter-TSS (NR_027436)	-212	NR_027436	283788	Hs.657131	NR_027436		LOC283788	-	FSHD region gene 1 pseudogene	pseudo
MEIS1_in_B13ko_peak_302	chr1	240937305	240937305	+	10.9776	NA	intron (NM_002924, intron 4 of 17)	LTR10B1|LTR|ERV1	-194967	NR_036069	100422856		NR_036069	ENSG00000265831	MIR3123	mir-3123	microRNA 3123	ncRNA
MEIS1_in_B13ko_peak_1937	chr9	11269252	11269252	+	10.971	NA	Intergenic	LTR25-int|LTR|ERV1	656046	NR_110696	101929428	Hs.434446	NR_110696	ENSG00000226717	PTPRD-AS2	-	PTPRD antisense RNA 2 (head to head)	ncRNA
MEIS1_in_B13ko_peak_1471	chr4	49315054	49315054	+	10.9477	NA	Intergenic	Intergenic	328412	NM_001286791	80157	Hs.479703	NM_025087	ENSG00000109182	CWH43	CWH43-C|PGAP2IP	cell wall biogenesis 43 C-terminal homolog	protein-coding
MEIS1_in_B13ko_peak_709	chr14_GL000194v1_random	115147	115147	+	10.9365	NA	promoter-TSS (NR_046439)	promoter-TSS (NR_046439)	-74	NR_046439	727764	Hs.626311	NM_001190825	ENSG00000277400	MAFIP	MIP|TEKT4P4|pp5644	MAFF interacting protein (pseudogene)	pseudo
MEIS1_in_B13ko_peak_1218	chr21	8996246	8996246	+	10.9195	NA	Intergenic	Intergenic	8876	NR_128714
MEIS1_in_B13ko_peak_140	chr1	149886446	149886446	+	10.9139	NA	promoter-TSS (NM_003517)	promoter-TSS (NM_003517)	236	NM_003528	8349	Hs.2178	NM_003528	ENSG00000184678	HIST2H2BE	GL105|H2B|H2B.1|H2BFQ|H2BGL105|H2BQ	histone cluster 2 H2B family member e	protein-coding
MEIS1_in_B13ko_peak_1980	chr9	122905521	122905521	+	10.906	NA	promoter-TSS (NM_018835)	promoter-TSS (NM_018835)	-238	NM_001100588	54542	Hs.533499	NM_018835	ENSG00000056586	RC3H2	MNAB|RNF164	ring finger and CCCH-type domains 2	protein-coding
MEIS1_in_B13ko_peak_548	chr12	94017670	94017670	+	10.906	NA	Intergenic	MSTA-int|LTR|ERVL-MaLR	-74064	NR_135017	105369911	Hs.577495	NR_135017	ENSG00000257283	LOC105369911	-	uncharacterized LOC105369911	ncRNA
MEIS1_in_B13ko_peak_271	chr1	222623022	222623022	+	10.8929	NA	intron (NM_198551, intron 2 of 27)	intron (NM_198551, intron 2 of 27)	4920	NM_001324062	375056	Hs.118474	NM_198551	ENSG00000154305	MIA3	ARNT|D320|TANGO|TANGO1|UNQ6077	MIA family member 3, ER export factor	protein-coding
MEIS1_in_B13ko_peak_1346	chr3	101308343	101308343	+	10.8881	NA	intron (NM_016247, intron 2 of 18)	THE1C-int|LTR|ERVL-MaLR	12232	NM_016247	50939	Hs.209249	NM_016247	ENSG00000081148	IMPG2	IPM200|RP56|SPACRCAN|VMD5	interphotoreceptor matrix proteoglycan 2	protein-coding
MEIS1_in_B13ko_peak_261	chr1	209196316	209196316	+	10.8378	NA	Intergenic	LTR8B|LTR|ERV1	-129140	NR_135085	105372897	Hs.116154	NR_135085	ENSG00000227940	LINC01696	-	long intergenic non-protein coding RNA 1696	ncRNA
MEIS1_in_B13ko_peak_2015	chrUn_GL000220v1	124247	124247	+	10.817	NA	intron (NR_038958, intron 5 of 6).3	AluSp|SINE|Alu	10899	NR_003287	100008589		NR_003287		RNA28SN5	RN28S1|RNA28S5	RNA, 28S ribosomal N5	rRNA
MEIS1_in_B13ko_peak_473	chr12	20904736	20904736	+	10.8124	NA	intron (NM_019844, intron 15 of 15)	MSTA-int|LTR|ERVL-MaLR	94032	NM_019844	28234	Hs.504966	NM_019844	ENSG00000111700	SLCO1B3	HBLRR|LST-2|LST-3TM13|LST3|OATP-8|OATP1B3|OATP8|SLC21A8	solute carrier organic anion transporter family member 1B3	protein-coding
MEIS1_in_B13ko_peak_1510	chr4	164043274	164043274	+	10.7789	NA	intron (NM_001166373, intron 2 of 7)	MSTA-int|LTR|ERVL-MaLR	154437	NM_012403	23520	Hs.661161	NM_012403		ANP32C	PP32R1	acidic nuclear phosphoprotein 32 family member C	protein-coding
MEIS1_in_B13ko_peak_1524	chr5	23977609	23977609	+	10.7789	NA	intron (NR_131245, intron 2 of 4)	LTR10B|LTR|ERV1	26261	NR_131245	439936	Hs.638078	NR_131245	ENSG00000248874	C5orf17	-	chromosome 5 open reading frame 17 (putative)	ncRNA
MEIS1_in_B13ko_peak_1822	chr7	102572614	102572614	+	10.7598	NA	promoter-TSS (NM_001097615)	promoter-TSS (NM_001097615)	7	NM_001097615	548644	Hs.610255	NM_001015884	ENSG00000168255	POLR2J3	POLR2J2|RPB11b1|RPB11b2	RNA polymerase II subunit J3	protein-coding
MEIS1_in_B13ko_peak_523	chr12	57646075	57646075	+	10.7598	NA	Intergenic	MER4-int|LTR|ERV1	-12836	NM_001276469	2583	Hs.159481	NM_001478	ENSG00000135454	B4GALNT1	GALGT|GALNACT|GalNAc-T|SPG26	beta-1,4-N-acetyl-galactosaminyltransferase 1	protein-coding
MEIS1_in_B13ko_peak_1840	chr7	122305901	122305901	+	10.7598	NA	non-coding (NR_036484, exon 3 of 7)	non-coding (NR_036484, exon 3 of 7)	-1390	NM_001024613	389549	Hs.553970	NM_001024613	ENSG00000128610	FEZF1	FEZ|HH22|ZNF312B	FEZ family zinc finger 1	protein-coding
MEIS1_in_B13ko_peak_1313	chr3	24628758	24628758	+	10.7598	NA	Intergenic	Intergenic	-107323	NR_039955
MEIS1_in_B13ko_peak_1635	chr6	26538081	26538081	+	10.7536	NA	promoter-TSS (NM_006353)	promoter-TSS (NM_006353)	-263	NM_006353	10473	Hs.236774	NM_006353	ENSG00000182952	HMGN4	HMG17L3|NHC	high mobility group nucleosomal binding domain 4	protein-coding
MEIS1_in_B13ko_peak_778	chr16	4538921	4538921	+	10.7486	NA	promoter-TSS (NM_001199054)	promoter-TSS (NM_001199054)	-106	NM_001199056	29965	Hs.654653	NM_013399	ENSG00000089486	CDIP1	C16orf5|CDIP|I1|LITAFL	cell death inducing p53 target 1	protein-coding
MEIS1_in_B13ko_peak_1492	chr4	104099439	104099439	+	10.7486	NA	Intergenic	THE1B-int|LTR|ERVL-MaLR	-379623	NM_001059	6870	Hs.942	NM_001059	ENSG00000169836	TACR3	HH11|NK-3R|NK3|NK3R|NKR|TAC3R|TAC3RL	tachykinin receptor 3	protein-coding
MEIS1_in_B13ko_peak_519	chr12	56864527	56864527	+	10.7486	NA	Intergenic	MSTA-int|LTR|ERVL-MaLR	69878	NM_148897	121214	Hs.380178	NM_148897	ENSG00000170426	SDR9C7	ARCI13|RDHS|SDR-O|SDRO	short chain dehydrogenase/reductase family 9C member 7	protein-coding
MEIS1_in_B13ko_peak_1670	chr6	66897761	66897761	+	10.7217	NA	Intergenic	LTR18A|LTR|ERVL	1109882	NR_026540	442229	Hs.390414	NR_026540		SLC25A51P1	MCART3P|bA707M13.1	solute carrier family 25 member 51 pseudogene 1	pseudo
MEIS1_in_B13ko_peak_539	chr12	79838817	79838817	+	10.706	NA	intron (NM_001244990, intron 4 of 24)	THE1C-int|LTR|ERVL-MaLR	75094	NM_001143886	4659	Hs.49582	NM_002480	ENSG00000058272	PPP1R12A	M130|MBS|MYPT1	protein phosphatase 1 regulatory subunit 12A	protein-coding
MEIS1_in_B13ko_peak_2020	chrUn_GL000220v1	134236	134236	+	10.5989	NA	Intergenic	Intergenic	-14468	NR_128717	103504733		NR_128717	ENSG00000275692	MIR6724-4	hsa-mir-6724-4	microRNA 6724-4	ncRNA
MEIS1_in_B13ko_peak_515	chr12	56654012	56654012	+	10.5969	NA	Intergenic	MER11B|LTR|ERVK	-7944	NM_001686	506	Hs.406510	NM_001686	ENSG00000110955	ATP5F1B	ATP5B|ATPMB|ATPSB|HEL-S-271	ATP synthase F1 subunit beta	protein-coding
MEIS1_in_B13ko_peak_208	chr1	168474520	168474520	+	10.5173	NA	intron (NR_125956, intron 4 of 4)	MSTA-int|LTR|ERVL-MaLR	21124	NR_125956	101928565	Hs.563806	NR_125956	ENSG00000228697	LOC101928565	-	uncharacterized LOC101928565	ncRNA
MEIS1_in_B13ko_peak_1943	chr9	31781005	31781005	+	10.4965	NA	Intergenic	THE1C-int|LTR|ERVL-MaLR	-399515	NR_135134	101929620	Hs.547175	NR_135134	ENSG00000260720	LINC01243	-	long intergenic non-protein coding RNA 1243	ncRNA
MEIS1_in_B13ko_peak_1876	chr7	158147709	158147709	+	10.4807	NA	intron (NM_130843, intron 6 of 21)	intron (NM_130843, intron 6 of 21)	293124	NR_038966	100506585	Hs.661265	NR_038966	ENSG00000233038	LOC100506585	-	uncharacterized LOC100506585	ncRNA
MEIS1_in_B13ko_peak_1914	chr8	87706235	87706235	+	10.4555	NA	Intergenic	THE1C-int|LTR|ERVL-MaLR	167833	NM_152418	138009	Hs.371738	NM_152418	ENSG00000176566	DCAF4L2	WDR21C	DDB1 and CUL4 associated factor 4 like 2	protein-coding
MEIS1_in_B13ko_peak_1921	chr8	116373396	116373396	+	10.4555	NA	Intergenic	THE1B-int|LTR|ERVL-MaLR	-48337	NR_046215	100859921	Hs.552281	NR_046215	ENSG00000249917	LINC00536	-	long intergenic non-protein coding RNA 536	ncRNA
MEIS1_in_B13ko_peak_1892	chr8	37993185	37993185	+	10.4555	NA	Intergenic	THE1C-int|LTR|ERVL-MaLR	-26519	NM_000025	155	Hs.2549	NM_000025	ENSG00000188778	ADRB3	BETA3AR	adrenoceptor beta 3	protein-coding
MEIS1_in_B13ko_peak_1650	chr6	27591837	27591837	+	10.4555	NA	Intergenic	tRNA-Lys-AAA|tRNA|tRNA	-102198	NR_038294	100507173	Hs.635987	NR_038292	ENSG00000281706	LINC01012	-	long intergenic non-protein coding RNA 1012	ncRNA
MEIS1_in_B13ko_peak_1009	chr19	22945754	22945754	+	10.4555	NA	Intergenic	LTR25-int|LTR|ERV1	57454	NM_001267716	388523	Hs.616766	NM_001267716	ENSG00000269067	ZNF728	-	zinc finger protein 728	protein-coding
MEIS1_in_B13ko_peak_1260	chr22	30922291	30922291	+	10.4555	NA	promoter-TSS (NR_026920)	promoter-TSS (NR_026920)	-17	NR_026920	150291	Hs.592202	NM_153044	ENSG00000235989	MORC2-AS1	C22orf27|NCRNA00325	MORC2 antisense RNA 1	ncRNA
MEIS1_in_B13ko_peak_845	chr17	18662137	18662137	+	10.4555	NA	exon (NM_001145045, exon 5 of 5)	exon (NM_001145045, exon 5 of 5)	11044	NR_026718	2310	Hs.592126	NR_026718		FOXO3B	FKHRL1P1|ZNF286C	forkhead box O3B pseudogene	pseudo
MEIS1_in_B13ko_peak_1281	chr22	50621051	50621051	+	10.4555	NA	Intergenic	(TGCATG)n|Simple_repeat|Simple_repeat	7122	NM_001085427	410	Hs.88251	NM_000487	ENSG00000100299	ARSA	MLD	arylsulfatase A	protein-coding
MEIS1_in_B13ko_peak_852	chr17	21316773	21316773	+	10.4555	NA	Intergenic	CpG	28737	NM_002756	5606	Hs.514012	NM_002756	ENSG00000034152	MAP2K3	MAPKK3|MEK3|MKK3|PRKMK3|SAPKK-2|SAPKK2	mitogen-activated protein kinase kinase 3	protein-coding
MEIS1_in_B13ko_peak_1970	chr9	93749047	93749047	+	10.4555	NA	Intergenic	THE1C-int|LTR|ERVL-MaLR	-70310	NR_036254	100422927		NR_036254	ENSG00000265347	MIR4291	-	microRNA 4291	ncRNA
MEIS1_in_B13ko_peak_818	chr16	89186532	89186532	+	10.4555	NA	intron (NM_004933, intron 5 of 13)	L2b|LINE|L2	13589	NM_001242757	146429	Hs.447544	NM_001242757	ENSG00000259803	SLC22A31	-	solute carrier family 22 member 31	protein-coding
MEIS1_in_B13ko_peak_1534	chr5	44656480	44656480	+	10.4555	NA	Intergenic	THE1B-int|LTR|ERVL-MaLR	-146198	NR_131946	102723839	Hs.561412	NR_131946		LINC02224	BRCAT107	long intergenic non-protein coding RNA 2224	ncRNA
MEIS1_in_B13ko_peak_1451	chr4	3380515	3380515	+	10.4555	NA	intron (NM_198227, intron 1 of 15)	THE1C-int|LTR|ERVL-MaLR	10518	NM_198227	6002	Hs.527061	NM_002926	ENSG00000159788	RGS12	-	regulator of G protein signaling 12	protein-coding
MEIS1_in_B13ko_peak_1098	chr2	67561740	67561740	+	10.4555	NA	Intergenic	Intergenic	164430	NM_019002	54465	Hs.353022	NM_019002	ENSG00000143971	ETAA1	ETAA16	ETAA1, ATR kinase activator	protein-coding
MEIS1_in_B13ko_peak_1436	chr3	196287814	196287814	+	10.4555	NA	promoter-TSS (NM_001312673)	promoter-TSS (NM_001312673)	-62	NM_001312673	5130	Hs.135997	NM_005017	ENSG00000161217	PCYT1A	CCTA|CT|CTA|CTPCT|PCYT1|SMDCRD	phosphate cytidylyltransferase 1, choline, alpha	protein-coding
MEIS1_in_B13ko_peak_1309	chr3	15656540	15656540	+	10.4555	NA	Intergenic	LTR10G|LTR|ERV1	40831	NR_036085	100422990		NR_036085	ENSG00000264354	MIR3134	-	microRNA 3134	ncRNA
MEIS1_in_B13ko_peak_1689	chr6	109191573	109191573	+	10.4555	NA	Intergenic	THE1B-int|LTR|ERVL-MaLR	-45041	NM_001277339	221262	Hs.373914	NM_173671	ENSG00000203799	CCDC162P	C6orf183|C6orf184|C6orf185|CCDC162	coiled-coil domain containing 162, pseudogene	pseudo
MEIS1_in_B13ko_peak_1638	chr6	26556619	26556619	+	10.4555	NA	Intergenic	tRNA-Lys-AAG|tRNA|tRNA	-12705	NR_134611	105374988	Hs.551772	NR_134611	ENSG00000284607	LOC105374988	-	uncharacterized LOC105374988	ncRNA
MEIS1_in_B13ko_peak_1567	chr5	115165358	115165358	+	10.4555	NA	intron (NM_018700, intron 1 of 9)	THE1D-int|LTR|ERVL-MaLR	4605	NM_001300759	55521	Hs.519514	NM_018700	ENSG00000152503	TRIM36	ANPH|HAPRIN|RBCC728|RNF98	tripartite motif containing 36	protein-coding
MEIS1_in_B13ko_peak_354	chr10	99249036	99249036	+	10.4555	NA	Intergenic	MSTA-int|LTR|ERVL-MaLR	-13161	NM_021828	60495	Hs.500750	NM_021828	ENSG00000172987	HPSE2	HPA2|HPR2|UFS|UFS1	heparanase 2 (inactive)	protein-coding
MEIS1_in_B13ko_peak_533	chr12	65484107	65484107	+	10.4555	NA	intron (NR_120431, intron 3 of 3)	MSTA-int|LTR|ERVL-MaLR	73204	NR_135033	105369187	Hs.738044	NR_135033	ENSG00000250748	LOC105369187	-	uncharacterized LOC105369187	ncRNA
MEIS1_in_B13ko_peak_379	chr11	26365479	26365479	+	10.4555	NA	intron (NM_031418, intron 1 of 26)	MSTA-int|LTR|ERVL-MaLR	33348	NM_031418	63982	Hs.91791	NM_031418	ENSG00000134343	ANO3	C11orf25|DYT23|DYT24|GENX-3947|TMEM16C	anoctamin 3	protein-coding
MEIS1_in_B13ko_peak_1911	chr8	87058475	87058475	+	10.4555	NA	intron (NM_173538, intron 4 of 10)	THE1C-int|LTR|ERVL-MaLR	192027	NM_173538	168975	Hs.246284	NM_173538	ENSG00000176571	CNBD1	-	cyclic nucleotide binding domain containing 1	protein-coding
MEIS1_in_B13ko_peak_1133	chr2	213463723	213463723	+	10.4555	NA	intron (NR_047660, intron 8 of 14)	THE1D-int|LTR|ERVL-MaLR	179344	NR_047660	79582	Hs.743365	NM_024532	ENSG00000144451	SPAG16	PF20|WDR29	sperm associated antigen 16	protein-coding
MEIS1_in_B13ko_peak_812	chr16	87379610	87379610	+	10.4555	NA	intron (NM_001282683, intron 2 of 9)	LTR22A|LTR|ERVK	4183	NM_024735	79791	Hs.567582	NM_024735	ENSG00000103264	FBXO31	FBX14|FBXO14|Fbx31|MRT45|pp2386	F-box protein 31	protein-coding
MEIS1_in_B13ko_peak_1467	chr4	40406812	40406812	+	10.4555	NA	Intergenic	THE1B-int|LTR|ERVL-MaLR	71483	NM_017581	55584	Hs.272278	NM_017581	ENSG00000174343	CHRNA9	HSA243342|NACHRA9	cholinergic receptor nicotinic alpha 9 subunit	protein-coding
MEIS1_in_B13ko_peak_1602	chr5	181187770	181187770	+	10.4555	NA	Intergenic	tRNA-Leu-CTY|tRNA|tRNA	4138	NR_108031	102577426	Hs.277359	NR_108031	ENSG00000248473	LINC01962	-	long intergenic non-protein coding RNA 1962	ncRNA
MEIS1_in_B13ko_peak_57	chr1	58546790	58546790	+	10.4555	NA	promoter-TSS (NM_145243)	promoter-TSS (NM_145243)	9	NM_145243	115209	Hs.425769	NM_145243	ENSG00000162600	OMA1	2010001O09Rik|DAB1|MPRP-1|MPRP1|YKR087C|ZMPOMA1|peptidase	OMA1 zinc metallopeptidase	protein-coding
MEIS1_in_B13ko_peak_1530	chr5	42424469	42424469	+	10.4555	NA	promoter-TSS (NM_001242401)	promoter-TSS (NM_001242401)	17	NM_001242400	2690	Hs.125180	NM_000163	ENSG00000112964	GHR	GHBP|GHIP	growth hormone receptor	protein-coding
MEIS1_in_B13ko_peak_1116	chr2	111762891	111762891	+	10.4555	NA	Intergenic	Intergenic	8243	NR_039929	100616165		NR_039929	ENSG00000266063	MIR4771-2	-	microRNA 4771-2	ncRNA
MEIS1_in_B13ko_peak_700	chr14	99563367	99563367	+	10.4555	NA	intron (NM_001144995, intron 1 of 5)	intron (NM_001144995, intron 1 of 5)	41023	NM_001144995	317762	Hs.709288	NM_001144995	ENSG00000205476	CCDC85C	-	coiled-coil domain containing 85C	protein-coding
MEIS1_in_B13ko_peak_643	chr13	94549657	94549657	+	10.4555	NA	promoter-TSS (NM_001322185)	promoter-TSS (NM_001322185)	-244	NM_001322183	1638	Hs.301865	NM_001922	ENSG00000080166	DCT	TRP-2|TYRP2	dopachrome tautomerase	protein-coding
MEIS1_in_B13ko_peak_1330	chr3	70712652	70712652	+	10.4555	NA	Intergenic	MSTA-int|LTR|ERVL-MaLR	352271	NM_001244813	27086	Hs.59368	NM_032682	ENSG00000114861	FOXP1	12CC4|HSPC215|MFH|QRF1|hFKH1B	forkhead box P1	protein-coding
MEIS1_in_B13ko_peak_449	chr12	2035090	2035090	+	10.4555	NA	Intergenic	Intergenic	-13262	NR_046768	100874369	Hs.208723	NR_046768	ENSG00000256257	CACNA1C-IT2	-	CACNA1C intronic transcript 2	ncRNA
MEIS1_in_B13ko_peak_342	chr10	68278015	68278015	+	10.4555	NA	Intergenic	THE1B-int|LTR|ERVL-MaLR	-45902	NM_145178	220202	Hs.175396	NM_145178	ENSG00000179774	ATOH7	Math5|NCRNA|PHPVAR|RNANC|bHLHa13	atonal bHLH transcription factor 7	protein-coding
MEIS1_in_B13ko_peak_1802	chr7	92590417	92590417	+	10.4555	NA	promoter-TSS (NM_001288584)	promoter-TSS (NM_001288584)	-23	NR_109929	257415	Hs.18564	NM_152789	ENSG00000234545	FAM133B	-	family with sequence similarity 133 member B	protein-coding
MEIS1_in_B13ko_peak_1094	chr2	51615112	51615112	+	10.4555	NA	intron (NR_135237, intron 5 of 10)	THE1C-int|LTR|ERVL-MaLR	582511	NR_135237	730100	Hs.640140	NR_135237	ENSG00000231918	LOC730100	-	uncharacterized LOC730100	ncRNA
MEIS1_in_B13ko_peak_1077	chr2	10011796	10011796	+	10.4555	NA	Intergenic	CpG	31605	NR_135558	101929882	Hs.405158	NR_135558		LOC101929882	-	uncharacterized LOC101929882	ncRNA
MEIS1_in_B13ko_peak_410	chr11	67483407	67483407	+	10.4555	NA	promoter-TSS (NM_001302959)	promoter-TSS (NM_001302959)	-109	NM_001302959	9049	Hs.412433	NM_003977	ENSG00000110711	AIP	ARA9|FKBP16|FKBP37|PITA1|SMTPHN|XAP-2|XAP2	aryl hydrocarbon receptor interacting protein	protein-coding
MEIS1_in_B13ko_peak_1933	chr8_KI270816v1_alt	146299	146299	+	10.4555	NA	Intergenic	LTR10B1|LTR|ERV1	-15200	NR_110193	286075	Hs.521922	NM_173831	ENSG00000181135	ZNF707	-	zinc finger protein 707	protein-coding
MEIS1_in_B13ko_peak_970	chr19	1507995	1507995	+	10.4555	NA	intron (NM_213604, intron 7 of 11)	CpG	5194	NM_213604	339366	Hs.371674	NM_213604	ENSG00000185761	ADAMTSL5	THSD6	ADAMTS like 5	protein-coding
MEIS1_in_B13ko_peak_1464	chr4	39371408	39371408	+	10.4555	NA	Intergenic	THE1B-int|LTR|ERVL-MaLR	-5027	NM_001204747	5981	Hs.507475	NM_002913	ENSG00000035928	RFC1	A1|MHCBFB|PO-GA|RECC1|RFC|RFC140	replication factor C subunit 1	protein-coding
MEIS1_in_B13ko_peak_945	chr18	53944936	53944936	+	10.4555	NA	Intergenic	LTR18A|LTR|ERVL	277476	NR_002970	677819	Hs.655869	NR_002970	ENSG00000207233	SNORA37	ACA37	small nucleolar RNA, H/ACA box 37	snoRNA
MEIS1_in_B13ko_peak_1113	chr2	108947491	108947491	+	10.4555	NA	intron (NM_022336, intron 1 of 11)	THE1D-int|LTR|ERVL-MaLR	41881	NM_022336	10913	Hs.171971	NM_022336	ENSG00000135960	EDAR	DL|ECTD10A|ECTD10B|ED1R|ED3|ED5|EDA-A1R|EDA1R|EDA3|HRM1	ectodysplasin A receptor	protein-coding
MEIS1_in_B13ko_peak_701	chr14	100155182	100155182	+	10.4555	NA	intron (NM_206918, intron 1 of 2)	Tigger16a|DNA|TcMar-Tigger	4493	NM_206918	123099	Hs.159643	NM_206918	ENSG00000168350	DEGS2	C14orf66|DES2|FADS8	delta 4-desaturase, sphingolipid 2	protein-coding
MEIS1_in_B13ko_peak_1889	chr8	29327577	29327577	+	10.4555	NA	Intergenic	Intergenic	21228	NM_057158	1846	Hs.417962	NM_001394	ENSG00000120875	DUSP4	HVH2|MKP-2|MKP2|TYP	dual specificity phosphatase 4	protein-coding
MEIS1_in_B13ko_peak_1058	chr19	58327368	58327368	+	10.4555	NA	promoter-TSS (NR_144444)	promoter-TSS (NR_144444)	-120	NR_144444	105372480	Hs.659382	NR_144444		LOC105372480	-	uncharacterized LOC105372480	ncRNA
MEIS1_in_B13ko_peak_371	chr11	2400439	2400439	+	10.4555	NA	promoter-TSS (NM_001297658)	promoter-TSS (NM_001297658)	-49	NM_001297660	10078	Hs.523424	NM_005706	ENSG00000184281	TSSC4	-	tumor suppressing subtransferable candidate 4	protein-coding
MEIS1_in_B13ko_peak_318	chr1	247172070	247172070	+	10.4546	NA	promoter-TSS (NM_001243740)	promoter-TSS (NM_001243740)	-53	NM_001297569	7678	Hs.421238	NM_003431	ENSG00000196418	ZNF124	HZF-16|HZF16|ZK7	zinc finger protein 124	protein-coding
MEIS1_in_B13ko_peak_296	chr1	235589103	235589103	+	10.4529	NA	intron (NM_004485, intron 1 of 2)	LTR18B|LTR|ERVL	60890	NM_001098722	2786	Hs.159711	NM_004485	ENSG00000168243	GNG4	-	G protein subunit gamma 4	protein-coding
MEIS1_in_B13ko_peak_1022	chr19	39502912	39502912	+	10.4529	NA	exon (NM_016941, exon 4 of 8)	exon (NM_016941, exon 4 of 8)	3995	NM_203486	10683	Hs.127792	NM_016941	ENSG00000090932	DLL3	SCDO1	delta like canonical Notch ligand 3	protein-coding
MEIS1_in_B13ko_peak_1199	chr21	8418188	8418188	+	10.4498	NA	Intergenic	AluSx1|SINE|Alu	-14342	NR_128716	103504739		NR_128716	ENSG00000277379	MIR6724-3	hsa-mir-6724-3	microRNA 6724-3	ncRNA
MEIS1_in_B13ko_peak_117	chr1	147719190	147719190	+	10.441	NA	Intergenic	LTR18B|LTR|ERVL	41416	NM_181703	2702	Hs.447968	NM_005266	ENSG00000265107	GJA5	ATFB11|CX40	gap junction protein alpha 5	protein-coding
MEIS1_in_B13ko_peak_1306	chr3	7214692	7214692	+	10.4387	NA	intron (NM_181874, intron 2 of 10)	intron (NM_181874, intron 2 of 10)	320592	NR_046606	100873937	Hs.570608	NR_046606	ENSG00000236202	GRM7-AS1	-	GRM7 antisense RNA 1	ncRNA
MEIS1_in_B13ko_peak_1693	chr6	126655161	126655161	+	10.4387	NA	Intergenic	THE1B-int|LTR|ERVL-MaLR	170530	NR_030316	693173		NR_030316	ENSG00000207632	MIR588	MIRN588|hsa-mir-588	microRNA 588	ncRNA
MEIS1_in_B13ko_peak_423	chr11	76776654	76776654	+	10.4387	NA	Intergenic	L1M4c|LINE|L1	-5659	NM_001258210	25987	Hs.8361	NM_015516	ENSG00000182704	TSKU	E2IG4|LRRC54|TSK	tsukushi, small leucine rich proteoglycan	protein-coding
MEIS1_in_B13ko_peak_642	chr13	91427092	91427092	+	10.4387	NA	intron (NM_004466, intron 1 of 7)	THE1D-int|LTR|ERVL-MaLR	28473	NM_004466	2262	Hs.655675	NM_004466	ENSG00000179399	GPC5	-	glypican 5	protein-coding
MEIS1_in_B13ko_peak_761	chr16	636755	636755	+	10.363	NA	promoter-TSS (NM_001040160)	promoter-TSS (NM_001040160)	-389	NR_109978	84326	Hs.239500	NM_032366	ENSG00000130731	METTL26	C16orf13|JFP2	methyltransferase like 26	protein-coding
MEIS1_in_B13ko_peak_1206	chr21	8452783	8452783	+	10.346	NA	Intergenic	AluSp|SINE|Alu	11637	NR_003287	100008589		NR_003287		RNA28SN5	RN28S1|RNA28S5	RNA, 28S ribosomal N5	rRNA
MEIS1_in_B13ko_peak_1227	chr21	15301219	15301219	+	10.3409	NA	Intergenic	LTR18A|LTR|ERVL	-236414	NM_003489	8204	Hs.155017	NM_003489	ENSG00000180530	NRIP1	RIP140	nuclear receptor interacting protein 1	protein-coding
MEIS1_in_B13ko_peak_918	chr17	81343260	81343260	+	10.318	NA	Intergenic	CpG	-12586	NM_178520	284186	Hs.364191	NM_178520	ENSG00000185332	TMEM105	-	transmembrane protein 105	protein-coding
MEIS1_in_B13ko_peak_276	chr1	226703611	226703611	+	10.2946	NA	intron (NM_002221, intron 2 of 7)	CpG	-28543	NR_103784	100506443	Hs.664293	NR_103784		ITPKB-IT1	-	ITPKB intronic transcript 1	ncRNA
MEIS1_in_B13ko_peak_121	chr1	148388559	148388559	+	10.2711	NA	TTS (NR_106967)	TTS (NR_106967)	277	NR_106967	102466225		NR_106967	ENSG00000278596	MIR6077	MIR6077-1|MIR6077-2|hsa-mir-6077|hsa-mir-6077-1|hsa-mir-6077-2	microRNA 6077	ncRNA
MEIS1_in_B13ko_peak_174	chr1	156728834	156728834	+	10.2673	NA	promoter-TSS (NM_001303095)	promoter-TSS (NM_001303095)	363	NM_015997	51093	Hs.512597	NM_015997	ENSG00000143303	RRNAD1	C1orf66|CGI-41|METTL25B	ribosomal RNA adenine dimethylase domain containing 1	protein-coding
MEIS1_in_B13ko_peak_612	chr12_GL877875v1_alt	1423	1423	+	10.2673	NA	Intergenic	TAR1|Satellite|telo	20592	NR_130745	100288778	Hs.459573	NR_130745	ENSG00000226210	LOC100288778	-	WASH complex subunit 1 pseudogene	pseudo
MEIS1_in_B13ko_peak_1732	chr7	17558188	17558188	+	10.2673	NA	intron (NR_110013, intron 1 of 3)	intron (NR_110013, intron 1 of 3)	721	NR_110013	101927630	Hs.583400	NR_110013	ENSG00000236039	LOC101927630	-	uncharacterized LOC101927630	ncRNA
MEIS1_in_B13ko_peak_1566	chr5	114939284	114939284	+	10.2592	NA	Intergenic	THE1D-int|LTR|ERVL-MaLR	-165871	NR_130785	101927078	Hs.160027	NR_130785		LOC101927078	-	uncharacterized LOC101927078	ncRNA
MEIS1_in_B13ko_peak_912	chr17	75183047	75183047	+	10.2403	NA	promoter-TSS (NM_006937)	promoter-TSS (NM_006937)	-44	NM_006937	6613	Hs.380973	NM_006937	ENSG00000188612	SUMO2	HSMT3|SMT3B|SMT3H2|SUMO3|Smt3A	small ubiquitin-like modifier 2	protein-coding
MEIS1_in_B13ko_peak_1421	chr3	183242640	183242640	+	10.2158	NA	intron (NM_015078, intron 15 of 29)	THE1B-int|LTR|ERVL-MaLR	-10604	NM_032047	84002	Hs.718506	NM_032047	ENSG00000176597	B3GNT5	B3GN-T5|beta3Gn-T5	UDP-GlcNAc:betaGal beta-1,3-N-acetylglucosaminyltransferase 5	protein-coding
MEIS1_in_B13ko_peak_1509	chr4	161256390	161256390	+	10.2153	NA	Intergenic	HUERS-P3-int|LTR|ERV1	-766343	NR_125888	101928052	Hs.647993	NR_125888	ENSG00000249419	LOC101928052	-	uncharacterized LOC101928052	ncRNA
MEIS1_in_B13ko_peak_1954	chr9	41229447	41229447	+	10.1994	NA	Intergenic	(TG)n|Simple_repeat|Simple_repeat	-4308	NR_039688	100616184		NR_039688	ENSG00000276029	MIR4477A	-	microRNA 4477a	ncRNA
MEIS1_in_B13ko_peak_1302	chr3	10471	10471	+	10.1768	NA	Intergenic	(CTAACC)n|Simple_repeat|Simple_repeat	-1280	NR_110824	102723448	Hs.543290	NR_110824		LINC01986	-	long intergenic non-protein coding RNA 1986	ncRNA
MEIS1_in_B13ko_peak_706	chr14_GL000009v2_random	124966	124966	+	10.1768	NA	NA	Intergenic	NA	NA
MEIS1_in_B13ko_peak_756	chr15	101979695	101979695	+	10.1612	NA	promoter-TSS (NR_034090)	promoter-TSS (NR_034090)	-602	NR_034090	100288486	Hs.644359	NR_034090	ENSG00000248472	DDX11L9	-	DEAD/H-box helicase 11 like 9	pseudo
MEIS1_in_B13ko_peak_1428	chr3	187742920	187742920	+	10.1612	NA	intron (NM_001706, intron 1 of 9)	intron (NM_001706, intron 1 of 9)	2805	NM_001706	604	Hs.478588	NM_001706	ENSG00000113916	BCL6	BCL5|BCL6A|LAZ3|ZBTB27|ZNF51	B cell CLL/lymphoma 6	protein-coding
MEIS1_in_B13ko_peak_1997	chr9	136872652	136872652	+	10.1612	NA	Intergenic	AluSx|SINE|Alu	-6316	NM_153200	8721	Hs.174050	NM_003792	ENSG00000107223	EDF1	CFAP280|EDF-1|MBF1	endothelial differentiation related factor 1	protein-coding
MEIS1_in_B13ko_peak_754	chr15	99928411	99928411	+	10.1538	NA	Intergenic	CpG	121388	NR_135737	400464	Hs.187134	NM_001013670	ENSG00000259363	LOC400464	-	ubiquitin conjugating enzyme E2 Q2 pseudogene	pseudo
MEIS1_in_B13ko_peak_1559	chr5	91591287	91591287	+	10.1538	NA	Intergenic	MER57-int|LTR|ERV1	-207914	NR_138072	57561	Hs.24684	NM_020801	ENSG00000113369	ARRDC3	TLIMP	arrestin domain containing 3	protein-coding
MEIS1_in_B13ko_peak_1076	chr2	7763621	7763621	+	10.1538	NA	Intergenic	THE1B-int|LTR|ERVL-MaLR	136034	NR_110256	101929551	Hs.116006	NR_110256	ENSG00000226506	LOC101929551	-	uncharacterized LOC101929551	ncRNA
MEIS1_in_B13ko_peak_1321	chr3	37860439	37860439	+	10.1538	NA	intron (NR_110532, intron 1 of 5)	intron (NR_110532, intron 1 of 5)	1341	NR_110532	101928153	Hs.657314	NR_110531	ENSG00000235257	ITGA9-AS1	-	ITGA9 antisense RNA 1	ncRNA
MEIS1_in_B13ko_peak_550	chr12	94498278	94498278	+	10.1538	NA	Intergenic	LTR18C|LTR|ERVL	38275	NR_027035	144486	Hs.118205	NR_027035	ENSG00000278916	CEP83-DT	CCDC41-AS1|CEP83-AS1	CEP83 divergent transcript	ncRNA
MEIS1_in_B13ko_peak_637	chr13	77171674	77171674	+	10.1538	NA	intron (NM_015057, intron 37 of 82)	intron (NM_015057, intron 37 of 82)	96160	NR_046716	100874212	Hs.569288	NR_046716	ENSG00000236051	MYCBP2-AS1	-	MYCBP2 antisense RNA 1	ncRNA
MEIS1_in_B13ko_peak_1884	chr8	8963367	8963367	+	10.1538	NA	Intergenic	CpG	-39437	NM_153332	90459	Hs.20000	NM_153332	ENSG00000104626	ERI1	3'HEXO|HEXO|THEX1	exoribonuclease 1	protein-coding
MEIS1_in_B13ko_peak_1314	chr3	24658375	24658375	+	10.1538	NA	Intergenic	L1MA5A|LINE|L1	-136940	NR_039955
MEIS1_in_B13ko_peak_1594	chr5	179060303	179060303	+	10.1538	NA	promoter-TSS (NM_014594)	promoter-TSS (NM_014594)	-112	NM_014594	30832	Hs.272328	NM_014594	ENSG00000177932	ZNF354C	KID3	zinc finger protein 354C	protein-coding
MEIS1_in_B13ko_peak_923	chr17_GL000205v2_random	88007	88007	+	10.1238	NA	Intergenic	Intergenic	-30041	NR_003682	403340	Hs.572501	NR_003682		MGC70870	-	C-terminal binding protein 2 pseudogene	pseudo
MEIS1_in_B13ko_peak_80	chr1	120761187	120761187	+	10.1162	NA	Intergenic	Intergenic	89798	NR_104086	101954277		NR_104086	ENSG00000275538	RNVU1-19	RNU1-126|RNU1-147|RNVU1-13|vU1.13|vU1.19	RNA, variant U1 small nuclear 19	snRNA
MEIS1_in_B13ko_peak_1130	chr2	202634739	202634739	+	10.0913	NA	promoter-TSS (NM_173511)	promoter-TSS (NM_173511)	-439	NM_173511	150864	Hs.471130	NM_173511	ENSG00000138439	FAM117B	ALS2CR13	family with sequence similarity 117 member B	protein-coding
MEIS1_in_B13ko_peak_540	chr12	83711032	83711032	+	10.0585	NA	Intergenic	MSTA-int|LTR|ERVL-MaLR	1023877	NM_001320322	160335	Hs.577775	NM_152588	ENSG00000179104	TMTC2	IBDBP1	transmembrane and tetratricopeptide repeat containing 2	protein-coding
MEIS1_in_B13ko_peak_529	chr12	63176661	63176661	+	10.0362	NA	Intergenic	THE1C-int|LTR|ERVL-MaLR	-23851	NM_000706	552	Hs.2131	NM_000706	ENSG00000166148	AVPR1A	AVPR V1a|AVPR1|V1aR	arginine vasopressin receptor 1A	protein-coding
MEIS1_in_B13ko_peak_1402	chr3	157160188	157160188	+	10.033	NA	5' UTR (NM_020307, exon 1 of 11)	5' UTR (NM_020307, exon 1 of 11)	572	NM_020307	57018	Hs.4859	NM_020307	ENSG00000163660	CCNL1	ANIA6A|BM-001|PRO1073|ania-6a	cyclin L1	protein-coding
MEIS1_in_B13ko_peak_506	chr12	53501534	53501534	+	9.99703	NA	promoter-TSS (NM_134324)	promoter-TSS (NM_134324)	-59	NM_134324	6895	Hs.326	NM_004178	ENSG00000139546	TARBP2	LOQS|TRBP|TRBP1|TRBP2	TARBP2, RISC loading complex RNA binding subunit	protein-coding
MEIS1_in_B13ko_peak_466	chr12	13046193	13046193	+	9.99703	NA	promoter-TSS (NR_106988).27	promoter-TSS (NR_106988).27	2	NR_106988
MEIS1_in_B13ko_peak_1368	chr3	128382480	128382480	+	9.97654	NA	intron (NM_021937, intron 6 of 6)	(TG)n|Simple_repeat|Simple_repeat	-81114	NR_037890	285224	Hs.683815	NR_037890	ENSG00000242049	DNAJB8-AS1	-	DNAJB8 antisense RNA 1	ncRNA
MEIS1_in_B13ko_peak_398	chr11	61392537	61392537	+	9.95416	NA	5' UTR (NM_001173990, exon 1 of 5)	5' UTR (NM_001173990, exon 1 of 5)	144	NM_016499	51259	Hs.26745	NM_016499	ENSG00000187049	TMEM216	HSPC244	transmembrane protein 216	protein-coding
MEIS1_in_B13ko_peak_232	chr1	192201523	192201523	+	9.92316	NA	Intergenic	THE1C-int|LTR|ERVL-MaLR	43061	NM_130782	64407	Hs.440890	NM_130782	ENSG00000150681	RGS18	RGS13	regulator of G protein signaling 18	protein-coding
MEIS1_in_B13ko_peak_521	chr12	57239259	57239259	+	9.92092	NA	intron (NM_020142, intron 1 of 4)	CpG	1433	NM_020142	56901	Hs.75069	NM_020142	ENSG00000185633	NDUFA4L2	NUOMS	NDUFA4, mitochondrial complex associated like 2	protein-coding
MEIS1_in_B13ko_peak_580	chr12	120321567	120321567	+	9.91733	NA	TTS (NM_000928)	TTS (NM_000928)	6222	NM_000928	5319	Hs.992	NM_000928	ENSG00000170890	PLA2G1B	PLA2|PLA2A|PPLA2	phospholipase A2 group IB	protein-coding
MEIS1_in_B13ko_peak_385	chr11	35663179	35663179	+	9.90957	NA	exon (NM_017583, exon 1 of 5)	exon (NM_017583, exon 1 of 5)	427	NM_017583	54765	Hs.192103	NM_017583	ENSG00000166326	TRIM44	AN3|DIPB|HSA249128|MC7	tripartite motif containing 44	protein-coding
MEIS1_in_B13ko_peak_272	chr1	223706715	223706715	+	9.89964	NA	intron (NM_001146068, intron 1 of 20)	intron (NM_001146068, intron 1 of 20)	5122	NM_001146068	824	Hs.350899	NM_001748	ENSG00000162909	CAPN2	CANP2|CANPL2|CANPml|mCANP	calpain 2	protein-coding
MEIS1_in_B13ko_peak_1288	chr22_KI270733v1_random	149901	149901	+	9.89147	NA	Intergenic	Intergenic	19697	NR_003287	100008589		NR_003287		RNA28SN5	RN28S1|RNA28S5	RNA, 28S ribosomal N5	rRNA
MEIS1_in_B13ko_peak_626	chr13	46387356	46387356	+	9.8644	NA	5' UTR (NM_001286762, exon 1 of 13)	5' UTR (NM_001286762, exon 1 of 13)	144	NM_001286762	80183	Hs.98117	NM_025113	ENSG00000102445	RUBCNL	C13orf18|KIAA0226L|PACER	RUN and cysteine rich domain containing beclin 1 interacting protein like	protein-coding
MEIS1_in_B13ko_peak_935	chr18	12948522	12948522	+	9.8644	NA	intron (NM_031216, intron 1 of 8)	CpG	538	NM_001013437	81929	Hs.301048	NM_031216	ENSG00000085415	SEH1L	SEC13L|SEH1A|SEH1B|Seh1	SEH1 like nucleoporin	protein-coding
MEIS1_in_B13ko_peak_1995	chr9	136400250	136400250	+	9.8644	NA	Intergenic	CpG	-1813	NM_003086	6621	Hs.113265	NM_003086	ENSG00000165684	SNAPC4	PTFalpha|SNAP190	small nuclear RNA activating complex polypeptide 4	protein-coding
MEIS1_in_B13ko_peak_1474	chr4	51844855	51844855	+	9.8582	NA	intron (NM_001287755, intron 1 of 10)	CpG	1276	NM_001287755	23142	Hs.605388	NM_015115	ENSG00000109184	DCUN1D4	-	defective in cullin neddylation 1 domain containing 4	protein-coding
MEIS1_in_B13ko_peak_218	chr1	180502684	180502684	+	9.80428	NA	5' UTR (NM_032360, exon 1 of 8)	5' UTR (NM_032360, exon 1 of 8)	203	NM_032360	84320	Hs.200051	NM_032360	ENSG00000230124	ACBD6	-	acyl-CoA binding domain containing 6	protein-coding
MEIS1_in_B13ko_peak_193	chr1	161465542	161465542	+	9.79313	NA	Intergenic	CpG	-39873	NM_021642	2212	Hs.352642	NM_021642	ENSG00000143226	FCGR2A	CD32|CD32A|CDw32|FCG2|FCGR2|FCGR2A1|FcGR|IGFR2	Fc fragment of IgG receptor IIa	protein-coding
MEIS1_in_B13ko_peak_1855	chr7	139004551	139004551	+	9.75927	NA	Intergenic	MER41-int|LTR|ERV1	-23233	NM_020910	57670	Hs.605380	NM_020910	ENSG00000122778	KIAA1549	-	KIAA1549	protein-coding
MEIS1_in_B13ko_peak_813	chr16	87388623	87388623	+	9.75546	NA	intron (NM_001282683, intron 2 of 9)	intron (NM_001282683, intron 2 of 9)	3484	NM_001282683	79791	Hs.567582	NM_024735	ENSG00000103264	FBXO31	FBX14|FBXO14|Fbx31|MRT45|pp2386	F-box protein 31	protein-coding
MEIS1_in_B13ko_peak_2030	chrUn_KI270442v1	391836	391836	+	9.74453	NA	NA	(CA)n|Simple_repeat|Simple_repeat	NA	NA
MEIS1_in_B13ko_peak_1244	chr22	11816282	11816282	+	9.74249	NA	Intergenic	ACRO1|Satellite|acro	-81124	NR_110761	102723769	Hs.652926	NR_110761		LOC102723769	-	uncharacterized LOC102723769	ncRNA
MEIS1_in_B13ko_peak_1526	chr5	34419824	34419824	+	9.7397	NA	Intergenic	MER4-int|LTR|ERV1	-236504	NM_015577	26064	Hs.431400	NM_015577	ENSG00000039560	RAI14	NORPEG|RAI13	retinoic acid induced 14	protein-coding
MEIS1_in_B13ko_peak_1216	chr21	8994040	8994040	+	9.7224	NA	Intergenic	Intergenic	6670	NR_128714
MEIS1_in_B13ko_peak_1790	chr7	84161607	84161607	+	9.66401	NA	intron (NM_006080, intron 1 of 16)	intron (NM_006080, intron 1 of 16)	33294	NM_006080	10371	Hs.252451	NM_006080	ENSG00000075213	SEMA3A	COLL1|HH16|Hsema-I|Hsema-III|SEMA1|SEMAD|SEMAIII|SEMAL|SemD|coll-1	semaphorin 3A	protein-coding
MEIS1_in_B13ko_peak_1394	chr3	152268787	152268787	+	9.66401	NA	non-coding (NR_027037, exon 2 of 2)	non-coding (NR_027037, exon 2 of 2)	319	NM_001314057	4154	Hs.201858	NM_021038	ENSG00000152601	MBNL1	EXP|MBNL	muscleblind like splicing regulator 1	protein-coding
MEIS1_in_B13ko_peak_229	chr1	186747862	186747862	+	9.66231	NA	Intergenic	THE1B-int|LTR|ERVL-MaLR	67208	NR_125801	103752588	Hs.441636	NR_125801	ENSG00000273129	PACERR	PACER|PTGS2-AS1|PTGS2AS1	PTGS2 antisense NFKB1 complex-mediated expression regulator RNA	ncRNA
MEIS1_in_B13ko_peak_609	chr12	133203362	133203362	+	9.64262	NA	exon (NM_003415, exon 6 of 6)	exon (NM_003415, exon 6 of 6)	21888	NM_001165881	10795	Hs.124047	NM_003415	ENSG00000090612	ZNF268	HZF3	zinc finger protein 268	protein-coding
MEIS1_in_B13ko_peak_1384	chr3	142578819	142578819	+	9.63685	NA	promoter-TSS (NM_001184)	promoter-TSS (NM_001184)	7	NM_001184	545	Hs.271791	NM_001184	ENSG00000175054	ATR	FCTCS|FRP1|MEC1|SCKL|SCKL1	ATR serine/threonine kinase	protein-coding
MEIS1_in_B13ko_peak_171	chr1	156457431	156457431	+	9.62198	NA	Intergenic	CpG	-27883	NM_006365	10485	Hs.380027	NM_006365	ENSG00000125462	C1orf61	CROC4	chromosome 1 open reading frame 61	protein-coding
MEIS1_in_B13ko_peak_189	chr1	161450777	161450777	+	9.61782	NA	Intergenic	CpG	-54638	NM_021642	2212	Hs.352642	NM_021642	ENSG00000143226	FCGR2A	CD32|CD32A|CDw32|FCG2|FCGR2|FCGR2A1|FcGR|IGFR2	Fc fragment of IgG receptor IIa	protein-coding
MEIS1_in_B13ko_peak_1425	chr3	186783248	186783248	+	9.5877	NA	promoter-TSS (NM_001967)	promoter-TSS (NM_001967)	-324	NM_001967	1974	Hs.518475	NM_001967	ENSG00000156976	EIF4A2	BM-010|DDX2B|EIF4A|EIF4F|eIF-4A-II|eIF4A-II	eukaryotic translation initiation factor 4A2	protein-coding
MEIS1_in_B13ko_peak_1399	chr3	155854614	155854614	+	9.58067	NA	promoter-TSS (NM_001190992)	promoter-TSS (NM_001190992)	-155	NM_001190992	9197	Hs.478031	NM_004733	ENSG00000169359	SLC33A1	ACATN|AT-1|AT1|CCHLND|SPG42	solute carrier family 33 member 1	protein-coding
MEIS1_in_B13ko_peak_841	chr17	8226642	8226642	+	9.58067	NA	non-coding (NR_046431, exon 22 of 22)	non-coding (NR_046431, exon 22 of 22)	-2599	NR_026951	284029	Hs.121692	NM_173621	ENSG00000178977	LINC00324	C17orf44|NCRNA00324	long intergenic non-protein coding RNA 324	ncRNA
MEIS1_in_B13ko_peak_1409	chr3	170908825	170908825	+	9.58067	NA	promoter-TSS (NM_020390)	promoter-TSS (NM_020390)	-188	NM_020390	56648	Hs.164144	NM_020390	ENSG00000163577	EIF5A2	EIF-5A2|eIF5AII	eukaryotic translation initiation factor 5A2	protein-coding
MEIS1_in_B13ko_peak_1662	chr6	28474604	28474604	+	9.58067	NA	Intergenic	tRNA-Thr-ACG_|tRNA|tRNA	-31102	NM_001012455	222696	Hs.721841	NM_001012455	ENSG00000187987	ZSCAN23	ZNF390|ZNF453|dJ29K1.3|dJ29K1.3.1	zinc finger and SCAN domain containing 23	protein-coding
MEIS1_in_B13ko_peak_30	chr1	23362427	23362427	+	9.58067	NA	exon (NM_030634, exon 3 of 3)	exon (NM_030634, exon 3 of 3)	5959	NM_030634	80818	Hs.293798	NM_030634	ENSG00000125945	ZNF436	ZNF|Zfp46	zinc finger protein 436	protein-coding
MEIS1_in_B13ko_peak_380	chr11	26823892	26823892	+	9.58067	NA	Intergenic	MSTA-int|LTR|ERVL-MaLR	-101865	NM_178498	159963	Hs.148907	NM_178498	ENSG00000148942	SLC5A12	SMCT2	solute carrier family 5 member 12	protein-coding
MEIS1_in_B13ko_peak_1008	chr19	22144572	22144572	+	9.58067	NA	Intergenic	LTR25-int|LTR|ERV1	52379	NM_001001411	163223	Hs.55452	NM_001001411	ENSG00000196109	ZNF676	-	zinc finger protein 676	protein-coding
MEIS1_in_B13ko_peak_1630	chr6	26331507	26331507	+	9.58067	NA	Intergenic	tRNA-Trp-TGG|tRNA|tRNA	-33652	NM_007047	11118	Hs.376046	NM_007047	ENSG00000186470	BTN3A2	BT3.2|BTF4|BTN3.2|CD277	butyrophilin subfamily 3 member A2	protein-coding
MEIS1_in_B13ko_peak_974	chr19	2933668	2933668	+	9.58067	NA	exon (NM_021217, exon 4 of 4)	exon (NM_021217, exon 4 of 4)	11303	NM_021217	58492	Hs.38004	NM_021217	ENSG00000175691	ZNF77	pT1	zinc finger protein 77	protein-coding
MEIS1_in_B13ko_peak_748	chr15	84406918	84406918	+	9.58067	NA	Intergenic	MamGypLTR3|LTR|Gypsy	-15601	NR_120379	103171574	Hs.694638	NR_120379	ENSG00000259774	LOC103171574	-	uncharacterized LOC103171574	ncRNA
MEIS1_in_B13ko_peak_213	chr1	173714905	173714905	+	9.58067	NA	promoter-TSS (NM_014458)	promoter-TSS (NM_014458)	-36	NM_014458	27252	Hs.495035	NM_014458	ENSG00000076321	KLHL20	KHLHX|KLEIP|KLHLX	kelch like family member 20	protein-coding
MEIS1_in_B13ko_peak_367	chr11	190085	190085	+	9.58067	NA	Intergenic	TAR1|Satellite|telo	-2995	NM_145651	147199	Hs.127059	NM_145651	ENSG00000188076	SCGB1C1	RYD5	secretoglobin family 1C member 1	protein-coding
MEIS1_in_B13ko_peak_890	chr17	49788575	49788575	+	9.58067	NA	promoter-TSS (NM_001199157)	promoter-TSS (NM_001199157)	-44	NM_001199158	11143	Hs.21907	NM_007067	ENSG00000136504	KAT7	HBO1|HBOA|MYST2|ZC2HC7	lysine acetyltransferase 7	protein-coding
MEIS1_in_B13ko_peak_426	chr11	84002437	84002437	+	9.58067	NA	intron (NM_001142699, intron 11 of 27)	THE1D-int|LTR|ERVL-MaLR	270843	NM_001142700	1740	Hs.367656	NM_001364	ENSG00000150672	DLG2	PPP1R58|PSD-93|PSD93|chapsyn-110	discs large MAGUK scaffold protein 2	protein-coding
MEIS1_in_B13ko_peak_1433	chr3	194327347	194327347	+	9.58067	NA	Intergenic	(CA)n|Simple_repeat|Simple_repeat	-14543	NR_024480	100131551	Hs.128066	NR_024480	ENSG00000214145	LINC00887	HEIRCC	long intergenic non-protein coding RNA 887	ncRNA
MEIS1_in_B13ko_peak_729	chr15	46768480	46768480	+	9.58067	NA	Intergenic	MER11B|LTR|ERVK	-415726	NM_001198999	80031	Hs.511265	NM_020858	ENSG00000137872	SEMA6D	-	semaphorin 6D	protein-coding
MEIS1_in_B13ko_peak_1626	chr6	26322184	26322184	+	9.58067	NA	Intergenic	Intergenic	-36685	NM_003543	8365	Hs.591790	NM_003543	ENSG00000158406	HIST1H4H	H4/h|H4FH	histone cluster 1 H4 family member h	protein-coding
MEIS1_in_B13ko_peak_59	chr1	66383381	66383381	+	9.58067	NA	Intergenic	LTR18A|LTR|ERVL	29003	NM_001297442	5142	Hs.198072	NM_002600	ENSG00000184588	PDE4B	DPDE4|PDEIVB	phosphodiesterase 4B	protein-coding
MEIS1_in_B13ko_peak_1445	chr3_KI270937v1_alt	80856	80856	+	9.58067	NA	Intergenic	Intergenic	-7320	NM_001282506	200958	Hs.308992	NM_020790	ENSG00000176945	MUC20	MUC-20	mucin 20, cell surface associated	protein-coding
MEIS1_in_B13ko_peak_1947	chr9	35192930	35192930	+	9.58067	NA	intron (NM_006377, intron 1 of 38)	HUERS-P3b-int|LTR|ERV1	30938	NM_006377	10497	Hs.493791	NM_006377	ENSG00000198722	UNC13B	MUNC13|UNC13|Unc13h2	unc-13 homolog B	protein-coding
MEIS1_in_B13ko_peak_1458	chr4	26679489	26679489	+	9.58067	NA	intron (NM_018317, intron 11 of 20)	THE1C-int|LTR|ERVL-MaLR	95565	NM_018317	55296	Hs.479403	NM_018317	ENSG00000109680	TBC1D19	-	TBC1 domain family member 19	protein-coding
MEIS1_in_B13ko_peak_1898	chr8	56074579	56074579	+	9.58067	NA	promoter-TSS (NM_001146227)	promoter-TSS (NM_001146227)	2	NM_001023	6224	Hs.8102	NM_001023	ENSG00000008988	RPS20	S20|uS10	ribosomal protein S20	protein-coding
MEIS1_in_B13ko_peak_1500	chr4	132630584	132630584	+	9.58067	NA	intron (NR_126401, intron 1 of 3)	THE1D-int|LTR|ERVL-MaLR	39495	NR_126401	104355285	Hs.123483	NR_126401	ENSG00000251398	LINC01256	TCONS_l2_00021715	long intergenic non-protein coding RNA 1256	ncRNA
MEIS1_in_B13ko_peak_1581	chr5	149937830	149937830	+	9.58067	NA	intron (NM_000440, intron 1 of 21)	MIRb|SINE|MIR	-4853	NR_110534	644762	Hs.730366	NR_110534		LOC644762	-	mitochondrial fission factor pseudogene	pseudo
MEIS1_in_B13ko_peak_993	chr19	11606697	11606697	+	9.58067	NA	intron (NM_001290083, intron 2 of 4)	THE1C-int|LTR|ERVL-MaLR	9277	NM_001290083	199692	Hs.526665	NM_145295	ENSG00000198551	ZNF627	-	zinc finger protein 627	protein-coding
MEIS1_in_B13ko_peak_742	chr15	75142680	75142680	+	9.58067	NA	Intergenic	MER52-int|LTR|ERV1	-59200	NM_015492	56905	Hs.17936	NM_015492	ENSG00000167173	C15orf39	-	chromosome 15 open reading frame 39	protein-coding
MEIS1_in_B13ko_peak_743	chr15	78860621	78860621	+	9.58067	NA	Intergenic	tRNA-Lys-AAG|tRNA|tRNA	-12160	NM_206839	10933	Hs.374503	NM_006791	ENSG00000185787	MORF4L1	Eaf3|FWP006|HsT17725|MEAF3|MORFRG15|MRG15|S863-6	mortality factor 4 like 1	protein-coding
MEIS1_in_B13ko_peak_27	chr1	17755309	17755309	+	9.58067	NA	promoter-TSS (NM_030812)	promoter-TSS (NM_030812)	-4	NM_030812	81569	Hs.2149	NM_030812	ENSG00000117148	ACTL8	CT57	actin like 8	protein-coding
MEIS1_in_B13ko_peak_25	chr1	16905767	16905767	+	9.58067	NA	Intergenic	LTR4|LTR|ERV1	9787	NR_004427	26870		NR_004427	ENSG00000207005	RNU1-2	RNU1C1|RNU1C2|U1C1|U1C21	RNA, U1 small nuclear 2	snRNA
MEIS1_in_B13ko_peak_1619	chr6	18122563	18122563	+	9.58067	NA	promoter-TSS (NM_198586)	promoter-TSS (NM_198586)	57	NM_198586	378884	Hs.348351	NM_198586	ENSG00000187566	NHLRC1	EPM2A|EPM2B|MALIN|bA204B7.2	NHL repeat containing E3 ubiquitin protein ligase 1	protein-coding
MEIS1_in_B13ko_peak_1671	chr6	71625558	71625558	+	9.58067	NA	Intergenic	THE1C-int|LTR|ERVL-MaLR	204531	NR_121615	102724000	Hs.145785	NR_121615		LINC01626	-	long intergenic non-protein coding RNA 1626	ncRNA
MEIS1_in_B13ko_peak_1109	chr2	88815883	88815883	+	9.58067	NA	Intergenic	THE1D-int|LTR|ERVL-MaLR	3513	NR_039635	100616399		NR_039635	ENSG00000265510	MIR4436A	mir-4436a	microRNA 4436a	ncRNA
MEIS1_in_B13ko_peak_1450	chr4	1088953	1088953	+	9.58067	NA	intron (NM_194439, intron 4 of 9)	THE1D-int|LTR|ERVL-MaLR	24611	NM_001193318	285498	Hs.248290	NM_194439	ENSG00000178222	RNF212	ZHP3	ring finger protein 212	protein-coding
MEIS1_in_B13ko_peak_465	chr12	12813287	12813287	+	9.58067	NA	promoter-TSS (NM_016355)	promoter-TSS (NM_016355)	-59	NM_201224	51202	Hs.719938	NM_016355	ENSG00000213782	DDX47	E4-DBP|HQ0256|MSTP162|RRP3	DEAD-box helicase 47	protein-coding
MEIS1_in_B13ko_peak_1998	chr9	137004534	137004534	+	9.58067	NA	Intergenic	LTR13|LTR|ERVK	-7962	NM_004669	9022	Hs.64746	NM_004669	ENSG00000169583	CLIC3	-	chloride intracellular channel 3	protein-coding
MEIS1_in_B13ko_peak_347	chr10	75739557	75739557	+	9.58067	NA	intron (NR_132791, intron 1 of 2)	intron (NR_132791, intron 1 of 2)	27102	NR_132791	105378367	Hs.464836	NR_132791		LOC105378367	-	uncharacterized LOC105378367	ncRNA
MEIS1_in_B13ko_peak_768	chr16	2861346	2861346	+	9.58067	NA	Intergenic	L2a|LINE|L2	-3176	NM_022119	64063	Hs.459709	NM_022119	ENSG00000005001	PRSS22	BSSP-4|SP001LA|hBSSP-4	serine protease 22	protein-coding
MEIS1_in_B13ko_peak_1514	chr4	190049973	190049973	+	9.58067	NA	Intergenic	Intergenic	-14529	NR_121644	100419743		NR_121644	ENSG00000281591	DBET	DBE-T|DUX4L30	D4Z4 binding element transcript (non-protein coding)	ncRNA
MEIS1_in_B13ko_peak_1275	chr22	49767447	49767447	+	9.58067	NA	Intergenic	L1M3f|LINE|L1	58453	NM_001304809	23774	Hs.127950	NM_014577	ENSG00000100425	BRD1	BRL|BRPF1|BRPF2	bromodomain containing 1	protein-coding
MEIS1_in_B13ko_peak_1026	chr19	44334880	44334880	+	9.58067	NA	intron (NM_001083335, intron 4 of 4)	MSTA-int|LTR|ERVL-MaLR	21824	NM_001083335	7771	Hs.48589	NM_013380	ENSG00000062370	ZNF112	ZFP112|ZNF228	zinc finger protein 112	protein-coding
MEIS1_in_B13ko_peak_1697	chr6	139374816	139374816	+	9.58067	NA	promoter-TSS (NM_001168389)	promoter-TSS (NM_001168389)	-166	NM_006079	10370	Hs.82071	NM_006079	ENSG00000164442	CITED2	ASD8|MRG-1|MRG1|P35SRJ|VSD2	Cbp/p300 interacting transactivator with Glu/Asp rich carboxy-terminal domain 2	protein-coding
MEIS1_in_B13ko_peak_1971	chr9	96778196	96778196	+	9.58067	NA	promoter-TSS (NM_001314059)	promoter-TSS (NM_001314059)	-67	NM_014930	22869	Hs.75264	NM_014930	ENSG00000081386	ZNF510	-	zinc finger protein 510	protein-coding
MEIS1_in_B13ko_peak_1649	chr6	27519584	27519584	+	9.5806	NA	Intergenic	tRNA-Gln-CAG|tRNA|tRNA	-46466	NM_001347832	7738	Hs.158174	NM_007149	ENSG00000096654	ZNF184	kr-ZNF3	zinc finger protein 184	protein-coding
MEIS1_in_B13ko_peak_1847	chr7	130440729	130440729	+	9.5806	NA	intron (NM_001257159, intron 1 of 8)	CpG	481	NM_001257158	95681	Hs.368315	NM_018718	ENSG00000106477	CEP41	JBTS15|TSGA14	centrosomal protein 41	protein-coding
MEIS1_in_B13ko_peak_1220	chr21	8998693	8998693	+	9.56142	NA	Intergenic	Intergenic	11323	NR_128714
MEIS1_in_B13ko_peak_307	chr1	245045735	245045735	+	9.55099	NA	intron (NM_001143943, intron 2 of 6)	MER51A|LTR|ERV1	-74866	NR_111907	101928068	Hs.134857	NR_111907		LOC101928068	-	uncharacterized LOC101928068	ncRNA
MEIS1_in_B13ko_peak_557	chr12	100685551	100685551	+	9.52324	NA	Intergenic	THE1C-int|LTR|ERVL-MaLR	91933	NM_001303131	283431	Hs.20575	NM_174942	ENSG00000139354	GAS2L3	G2L3	growth arrest specific 2 like 3	protein-coding
MEIS1_in_B13ko_peak_1503	chr4	142697543	142697543	+	9.47115	NA	intron (NM_003866, intron 2 of 26)	intron (NM_003866, intron 2 of 26)	148992	NM_001331040	8821	Hs.176376	NM_003866	ENSG00000109452	INPP4B	-	inositol polyphosphate-4-phosphatase type II B	protein-coding
MEIS1_in_B13ko_peak_341	chr10	67764552	67764552	+	9.47115	NA	Intergenic	tRNA-Ser-TCA|tRNA|tRNA	-68361	NM_013266	29119	Hs.21375	NM_013266	ENSG00000183230	CTNNA3	ARVD13|VR22	catenin alpha 3	protein-coding
MEIS1_in_B13ko_peak_1341	chr3	96484008	96484008	+	9.47115	NA	Intergenic	Intergenic	124044	NR_107027	102465864		NR_107027	ENSG00000278103	MIR8060	hsa-mir-8060	microRNA 8060	ncRNA
MEIS1_in_B13ko_peak_1780	chr7	73308900	73308900	+	9.47115	NA	promoter-TSS (NM_001168347)	promoter-TSS (NM_001168347)	-33	NM_001168347	55695	Hs.510927	NM_018044	ENSG00000130305	NSUN5	NOL1|NOL1R|NSUN5A|WBSCR20|WBSCR20A|p120|p120(NOL1)	NOP2/Sun RNA methyltransferase family member 5	protein-coding
MEIS1_in_B13ko_peak_279	chr1	228139979	228139979	+	9.47115	NA	promoter-TSS (NM_001159390)	promoter-TSS (NM_001159390)	-105	NM_001242839	2987	Hs.376933	NM_000858	ENSG00000143774	GUK1	GMK	guanylate kinase 1	protein-coding
MEIS1_in_B13ko_peak_497	chr12	49188777	49188777	+	9.47115	NA	5' UTR (NM_001270399, exon 1 of 4)	5' UTR (NM_001270399, exon 1 of 4)	547	NM_006009	7846	Hs.654422	NM_006009	ENSG00000167552	TUBA1A	B-ALPHA-1|LIS3|TUBA3	tubulin alpha 1a	protein-coding
MEIS1_in_B13ko_peak_674	chr14	39056251	39056251	+	9.46651	NA	intron (NM_006364, intron 13 of 19)	LTR76|LTR|ERV1	47277	NM_006364	10484	Hs.272927	NM_006364	ENSG00000100934	SEC23A	CLSD|hSec23A	Sec23 homolog A, coat complex II component	protein-coding
MEIS1_in_B13ko_peak_1422	chr3	183653389	183653389	+	9.44442	NA	intron (NM_017644, intron 3 of 7)	LTR4|LTR|ERV1	17766	NM_017644	54800	Hs.407709	NM_017644	ENSG00000114796	KLHL24	DRE1|EBSSH|KRIP6	kelch like family member 24	protein-coding
MEIS1_in_B13ko_peak_696	chr14	84442773	84442773	+	9.41087	NA	Intergenic	Intergenic	-944502	NR_135155	105370605		NR_135155	ENSG00000258814	LINC02329	-	long intergenic non-protein coding RNA 2329	ncRNA
MEIS1_in_B13ko_peak_1194	chr21	8408673	8408673	+	9.40979	NA	intron (NR_038958, intron 5 of 6).2	AluSp|SINE|Alu	13066	NR_003285	100008587	Hs.426704	NR_003285		RNA5-8SN5	RN5-8S1|RNA5-8S5	RNA, 5.8S ribosomal N5	rRNA
MEIS1_in_B13ko_peak_1728	chr7	7855341	7855341	+	9.38507	NA	intron (NM_001302348, intron 3 of 3)	THE1D-int|LTR|ERVL-MaLR	-113402	NM_138426	113263	Hs.131673	NM_138426	ENSG00000106415	GLCCI1	FAM117C|GCTR|GIG18|TSSN1	glucocorticoid induced 1	protein-coding
MEIS1_in_B13ko_peak_248	chr1	203235116	203235116	+	9.35437	NA	Intergenic	MER11B|LTR|ERVK	-5384	NR_045784	1118	Hs.201688	NM_003465	ENSG00000133063	CHIT1	CHI3|CHIT|CHITD	chitinase 1	protein-coding
MEIS1_in_B13ko_peak_600	chr12	132194259	132194259	+	9.35437	NA	Intergenic	MamGypLTR3a|LTR|Gypsy	11769	NM_021808	50614	Hs.301062	NM_021808	ENSG00000182870	GALNT9	GALNAC-T9|GALNACT9	polypeptide N-acetylgalactosaminyltransferase 9	protein-coding
MEIS1_in_B13ko_peak_166	chr1	155140598	155140598	+	9.33849	NA	promoter-TSS (NM_018973)	promoter-TSS (NM_018973)	-78	NM_153741	54344	Hs.110477	NM_018973	ENSG00000179085	DPM3	CDG1O	dolichyl-phosphate mannosyltransferase subunit 3	protein-coding
MEIS1_in_B13ko_peak_1312	chr3	24365336	24365336	+	9.33849	NA	intron (NM_001128176, intron 1 of 10)	intron (NM_001128176, intron 1 of 10)	-128751	NR_046244	644990	Hs.631912	NR_046244		THRB-AS1	-	THRB antisense RNA 1	ncRNA
MEIS1_in_B13ko_peak_1447	chr4	53060	53060	+	9.3144	NA	promoter-TSS (NM_001286054)	promoter-TSS (NM_001286054)	-225	NM_182524	152687	Hs.709469	NM_182524	ENSG00000272602	ZNF595	-	zinc finger protein 595	protein-coding
MEIS1_in_B13ko_peak_916	chr17	78214155	78214155	+	9.28602	NA	promoter-TSS (NM_001168)	promoter-TSS (NM_001168)	-41	NM_001168	332	Hs.744872	NM_001168	ENSG00000089685	BIRC5	API4|EPR-1	baculoviral IAP repeat containing 5	protein-coding
MEIS1_in_B13ko_peak_1315	chr3	27722261	27722261	+	9.28602	NA	exon (NM_005442, exon 1 of 6)	exon (NM_005442, exon 1 of 6)	454	NM_001278183	8320	Hs.591663	NM_005442	ENSG00000163508	EOMES	TBR2	eomesodermin	protein-coding
MEIS1_in_B13ko_peak_1621	chr6	24670682	24670682	+	9.28602	NA	intron (NM_018473, intron 1 of 2)	MER4-int|LTR|ERV1	3647	NM_018473	55856	Hs.731605	NM_018473	ENSG00000112304	ACOT13	HT012|PNAS-27|THEM2	acyl-CoA thioesterase 13	protein-coding
MEIS1_in_B13ko_peak_630	chr13	52159709	52159709	+	9.28602	NA	promoter-TSS (NM_152720)	promoter-TSS (NM_152720)	152	NM_001146099	4752	Hs.409989	NM_002498	ENSG00000136098	NEK3	HSPK36	NIMA related kinase 3	protein-coding
MEIS1_in_B13ko_peak_343	chr10	71889072	71889072	+	9.28602	NA	Intergenic	CpG	-37697	NM_002778	5660	Hs.523004	NM_002778	ENSG00000197746	PSAP	GLBA|SAP1	prosaposin	protein-coding
MEIS1_in_B13ko_peak_1282	chr22	50648929	50648929	+	9.28602	NA	Intergenic	MER4-int|LTR|ERV1	-20756	NM_001085428	410	Hs.88251	NM_000487	ENSG00000100299	ARSA	MLD	arylsulfatase A	protein-coding
MEIS1_in_B13ko_peak_686	chr14	65395392	65395392	+	9.28602	NA	Intergenic	THE1B-int|LTR|ERVL-MaLR	-15200	NR_038167	2530	Hs.597649	NM_004480	ENSG00000033170	FUT8	-	fucosyltransferase 8	protein-coding
MEIS1_in_B13ko_peak_915	chr17	77167895	77167895	+	9.28602	NA	intron (NM_001204408, intron 5 of 19)	LTR10B1|LTR|ERV1	-17318	NM_001144001	6397	Hs.464184	NM_003003	ENSG00000129657	SEC14L1	PRELID4A|SEC14L	SEC14 like lipid binding 1	protein-coding
MEIS1_in_B13ko_peak_1349	chr3	105491016	105491016	+	9.25422	NA	intron (NM_001243283, intron 1 of 2)	THE1C-int|LTR|ERVL-MaLR	124303	NM_001627	214	Hs.591293	NM_001627	ENSG00000170017	ALCAM	CD166|MEMD	activated leukocyte cell adhesion molecule	protein-coding
MEIS1_in_B13ko_peak_1395	chr3	152269609	152269609	+	9.25132	NA	promoter-TSS (NR_027037)	promoter-TSS (NR_027037)	17	NR_027038	401093	Hs.725347	NR_027037	ENSG00000229619	MBNL1-AS1	-	MBNL1 antisense RNA 1	ncRNA
MEIS1_in_B13ko_peak_116	chr1	147677868	147677868	+	9.25132	NA	Intergenic	LTR10C|LTR|ERV1	-7325	NR_136635	51205	Hs.562154	NM_016361	ENSG00000162836	ACP6	ACPL1|LPAP|PACPL1	acid phosphatase 6, lysophosphatidic	protein-coding
MEIS1_in_B13ko_peak_780	chr16	11916194	11916194	+	9.25132	NA	promoter-TSS (NM_002094)	promoter-TSS (NM_002094)	-226	NM_002094	2935	Hs.528780	NM_002094	ENSG00000103342	GSPT1	551G9.2|ETF3A|GST1|eRF3a	G1 to S phase transition 1	protein-coding
MEIS1_in_B13ko_peak_1050	chr19	50794890	50794890	+	9.25132	NA	exon (NM_033068, exon 10 of 11)	exon (NM_033068, exon 10 of 11)	4235	NR_003068	692203		NR_003068	ENSG00000221381	SNORD88B	HBII-180B	small nucleolar RNA, C/D box 88B	snoRNA
MEIS1_in_B13ko_peak_155	chr1	151907583	151907583	+	9.25132	NA	intron (NM_053055, intron 1 of 5)	LTR76|LTR|ERV1	2302	NM_053055	117145	Hs.164070	NM_053055	ENSG00000159445	THEM4	CTMP	thioesterase superfamily member 4	protein-coding
MEIS1_in_B13ko_peak_1868	chr7	151051230	151051230	+	9.24765	NA	exon (NM_004769, exon 6 of 11)	exon (NM_004769, exon 6 of 11)	2938	NR_046401	9311	Hs.647113	NM_004769	ENSG00000213199	ASIC3	ACCN3|DRASIC|SLNAC1|TNaC1	acid sensing ion channel subunit 3	protein-coding
MEIS1_in_B13ko_peak_1701	chr6	142213567	142213567	+	9.23308	NA	intron (NM_016485, intron 7 of 7)	MSTA-int|LTR|ERVL-MaLR	66405	NM_016485	51534	Hs.431367	NM_016485	ENSG00000009844	VTA1	C6orf55|DRG-1|DRG1|HSPC228|LIP5|My012|SBP1	vesicle trafficking 1	protein-coding
MEIS1_in_B13ko_peak_1371	chr3	128921087	128921087	+	9.19354	NA	Intergenic	LTR14B|LTR|ERVK	41597	NR_033426	28976	Hs.567482	NM_014049	ENSG00000177646	ACAD9	NPD002	acyl-CoA dehydrogenase family member 9	protein-coding
MEIS1_in_B13ko_peak_1834	chr7	118481422	118481422	+	9.1585	NA	Intergenic	THE1B-int|LTR|ERVL-MaLR	256764	NM_019644	56311	Hs.729340	NM_019644	ENSG00000106013	ANKRD7	TSA806	ankyrin repeat domain 7	protein-coding
MEIS1_in_B13ko_peak_544	chr12	89526011	89526011	+	9.1585	NA	promoter-TSS (NM_001199777)	promoter-TSS (NM_001199777)	251	NR_037659	282809	Hs.25130	NM_172240	ENSG00000139323	POC1B	CORD20|PIX1|TUWD12|WDR51B	POC1 centriolar protein B	protein-coding
MEIS1_in_B13ko_peak_1385	chr3	148410236	148410236	+	9.1585	NA	Intergenic	THE1B-int|LTR|ERVL-MaLR	-287635	NM_004835	185	Hs.477887	NM_000685	ENSG00000144891	AGTR1	AG2S|AGTR1B|AT1|AT1AR|AT1B|AT1BR|AT1R|AT2R1|HAT1R	angiotensin II receptor type 1	protein-coding
MEIS1_in_B13ko_peak_373	chr11	10044880	10044880	+	9.1585	NA	intron (NM_030962, intron 2 of 39)	LTR10G|LTR|ERV1	205738	NR_120539	101928008	Hs.585524	NR_120539	ENSG00000255476	LOC101928008	-	uncharacterized LOC101928008	ncRNA
MEIS1_in_B13ko_peak_1966	chr9	90555591	90555591	+	9.1585	NA	intron (NR_034157, intron 1 of 5)	L1ME4b|LINE|L1	27155	NR_034157	340515	Hs.522284	NM_001105317		LINC01501	-	long intergenic non-protein coding RNA 1501	ncRNA
MEIS1_in_B13ko_peak_1389	chr3	149698614	149698614	+	9.1585	NA	intron (NM_001168278, intron 1 of 7)	MSTB-int|LTR|ERVL-MaLR	4659	NM_001168278	25937	Hs.477921	NM_015472	ENSG00000018408	WWTR1	TAZ	WW domain containing transcription regulator 1	protein-coding
MEIS1_in_B13ko_peak_349	chr10	77287848	77287848	+	9.1585	NA	intron (NM_001271518, intron 1 of 27)	intron (NM_001271518, intron 1 of 27)	62913	NM_001322838	3778	Hs.144795	NM_002247	ENSG00000156113	KCNMA1	BKTM|CADEDS|KCa1.1|MaxiK|PNKD3|SAKCA|SLO|SLO-ALPHA|SLO1|bA205K10.1|hSlo|mSLO1	potassium calcium-activated channel subfamily M alpha 1	protein-coding
MEIS1_in_B13ko_peak_1376	chr3	131502984	131502984	+	9.1585	NA	promoter-TSS (NM_007208)	promoter-TSS (NM_007208)	32	NM_007208	11222	Hs.205163	NM_007208	ENSG00000114686	MRPL3	COXPD9|MRL3|RPML3	mitochondrial ribosomal protein L3	protein-coding
MEIS1_in_B13ko_peak_1716	chr7	588601	588601	+	9.1585	NA	intron (NM_001164759, intron 7 of 10)	intron (NM_001164759, intron 7 of 10)	-14244	NR_110054	101926963	Hs.521338	NR_110054		LOC101926963	-	uncharacterized LOC101926963	ncRNA
MEIS1_in_B13ko_peak_1894	chr8	42140162	42140162	+	9.1585	NA	Intergenic	CpG	-12784	NM_001134296	10947	Hs.654529	NM_006803	ENSG00000070718	AP3M2	AP47B|CLA20|P47B	adaptor related protein complex 3 subunit mu 2	protein-coding
MEIS1_in_B13ko_peak_975	chr19	3036309	3036309	+	9.1585	NA	intron (NM_001144761, intron 2 of 19)	CpG	-6695	NM_001144762	7089	Hs.332173	NM_003260	ENSG00000065717	TLE2	ESG|ESG2|GRG2	transducin like enhancer of split 2	protein-coding
MEIS1_in_B13ko_peak_484	chr12	31850519	31850519	+	9.1585	NA	Intergenic	MER41-int|LTR|ERV1	36684	NR_135029	105369723	Hs.736954	NR_135029	ENSG00000255760	LINC02422	-	long intergenic non-protein coding RNA 2422	ncRNA
MEIS1_in_B13ko_peak_234	chr1	193059385	193059385	+	9.14493	NA	promoter-TSS (NM_015984)	promoter-TSS (NM_015984)	8	NM_001199263	51377	Hs.145469	NM_015984	ENSG00000116750	UCHL5	CGI-70|INO80R|UCH-L5|UCH37	ubiquitin C-terminal hydrolase L5	protein-coding
MEIS1_in_B13ko_peak_1092	chr2	51135116	51135116	+	9.14177	NA	intron (NR_135237, intron 2 of 10)	THE1B-int|LTR|ERVL-MaLR	102515	NR_135237	730100	Hs.640140	NR_135237	ENSG00000231918	LOC730100	-	uncharacterized LOC730100	ncRNA
MEIS1_in_B13ko_peak_11	chr1	8703530	8703530	+	9.13649	NA	intron (NM_001042681, intron 1 of 22)	intron (NM_001042681, intron 1 of 22)	114110	NM_001042681	473	Hs.463041	NM_012102	ENSG00000142599	RERE	ARG|ARP|ATN1L|DNB1|NEDBEH	arginine-glutamic acid dipeptide repeats	protein-coding
MEIS1_in_B13ko_peak_273	chr1	224616523	224616523	+	9.09426	NA	promoter-TSS (NM_152495)	promoter-TSS (NM_152495)	46	NR_136287	149111	Hs.731723	NM_152495	ENSG00000143786	CNIH3	CNIH-3	cornichon family AMPA receptor auxiliary protein 3	protein-coding
MEIS1_in_B13ko_peak_764	chr16	1309305	1309305	+	9.08882	NA	promoter-TSS (NM_194259)	promoter-TSS (NM_194259)	152	NM_194260	7329	Hs.302903	NM_003345	ENSG00000103275	UBE2I	C358B7.1|P18|UBC9	ubiquitin conjugating enzyme E2 I	protein-coding
MEIS1_in_B13ko_peak_207	chr1	168225855	168225855	+	9.08882	NA	promoter-TSS (NM_199344)	promoter-TSS (NM_199344)	-162	NM_199344	375035	Hs.645435	NM_199344	ENSG00000213064	SFT2D2	UNQ512|dJ747L4.C1.2	SFT2 domain containing 2	protein-coding
MEIS1_in_B13ko_peak_958	chr18	73189917	73189917	+	9.06166	NA	intron (NR_034133, intron 3 of 5)	MER110A|LTR|ERV1	74581	NR_034133	400655	Hs.579378	NR_034133	ENSG00000263711	LOC400655	-	uncharacterized LOC400655	ncRNA
MEIS1_in_B13ko_peak_1158	chr20	38243036	38243036	+	9.0338	NA	intron (NM_001029864, intron 2 of 13)	MamGypLTR3a|LTR|Gypsy	-17139	NR_104170	149684	Hs.628250	NR_104170	ENSG00000285347	LOC149684	-	uncharacterized LOC149684	ncRNA
MEIS1_in_B13ko_peak_819	chr17	134548	134548	+	9.0338	NA	Intergenic	TAR1|Satellite|telo	-3023	NM_001097610	653486	Hs.127059	NM_001097610	ENSG00000268320	SCGB1C2	-	secretoglobin family 1C member 2	protein-coding
MEIS1_in_B13ko_peak_293	chr1	235128931	235128931	+	9.02246	NA	promoter-TSS (NR_002956)	promoter-TSS (NR_002956)	10	NM_014765	9804	Hs.533192	NM_014765	ENSG00000173726	TOMM20	MAS20|MOM19|TOM20	translocase of outer mitochondrial membrane 20	protein-coding
MEIS1_in_B13ko_peak_1448	chr4	678121	678121	+	8.94771	NA	intron (NM_002477, intron 1 of 6)	(GTGTGT)n|Simple_repeat|Simple_repeat	199	NM_002477	4636	Hs.410970	NM_002477	ENSG00000215375	MYL5	MYLC2	myosin light chain 5	protein-coding
MEIS1_in_B13ko_peak_1382	chr3	142288227	142288227	+	8.92723	NA	Intergenic	PABL_A-int|LTR|ERV1	-62620	NR_033289	256356	Hs.135904	NM_152776	ENSG00000175066	GK5	-	glycerol kinase 5 (putative)	protein-coding
MEIS1_in_B13ko_peak_1730	chr7	10401211	10401211	+	8.9223	NA	Intergenic	THE1D-int|LTR|ERVL-MaLR	538975	NM_002489	4697	Hs.50098	NM_002489	ENSG00000189043	NDUFA4	CI-9k|CI-MLRQ|MLRQ	NDUFA4, mitochondrial complex associated	protein-coding
MEIS1_in_B13ko_peak_1123	chr2	180225344	180225344	+	8.8912	NA	Intergenic	THE1C-int|LTR|ERVL-MaLR	-218291	NM_020943	57703	Hs.311363	NM_020943	ENSG00000163510	CWC22	EIF4GL|NCM|fSAPb	CWC22 spliceosome associated protein homolog	protein-coding
MEIS1_in_B13ko_peak_2003	chrUn_GL000195v1	32888	32888	+	8.8912	NA	Intergenic	Intergenic	53847	NM_001242480	389831	Hs.743984	NM_001242480	ENSG00000276256	LOC389831	-	uncharacterized LOC389831	protein-coding
MEIS1_in_B13ko_peak_1740	chr7	27096107	27096107	+	8.87459	NA	promoter-TSS (NM_005522)	promoter-TSS (NM_005522)	13	NR_038367	100506311	Hs.445239	NR_038366	ENSG00000233429	HOTAIRM1	HOXA-AS1|HOXA1-AS1|NCRNA00179	HOXA transcript antisense RNA, myeloid-specific 1	ncRNA
MEIS1_in_B13ko_peak_1742	chr7	27156249	27156249	+	8.84307	NA	TTS (NR_038832)	TTS (NR_038832)	428	NM_006896	3204	Hs.610216	NM_006896	ENSG00000122592	HOXA7	ANTP|HOX1|HOX1.1|HOX1A	homeobox A7	protein-coding
MEIS1_in_B13ko_peak_2046	chrY	57215341	57215341	+	8.83687	NA	promoter-TSS (NR_110561).2	promoter-TSS (NR_110561).2	-638	NR_110561	727856	Hs.740212	NR_110561		DDX11L16	-	DEAD/H-box helicase 11 like 16	pseudo
MEIS1_in_B13ko_peak_1874	chr7	155792053	155792053	+	8.8223	NA	Intergenic	Intergenic	17019	NR_132319	6469	Hs.164537	NM_000193	ENSG00000164690	SHH	HHG1|HLP3|HPE3|MCOPCB5|SMMCI|ShhNC|TPT|TPTPS	sonic hedgehog	protein-coding
MEIS1_in_B13ko_peak_1189	chr21	8234370	8234370	+	8.78664	NA	intron (NR_003287, intron 1 of 2)	(TCTC)n|Simple_repeat|Simple_repeat	-15135	NR_128715	103504727		NR_128715	ENSG00000274060	MIR6724-2	hsa-mir-6724-2	microRNA 6724-2	ncRNA
MEIS1_in_B13ko_peak_711	chr14_KI270722v1_random	183195	183195	+	8.78369	NA	NA	Intergenic	NA	NA
MEIS1_in_B13ko_peak_274	chr1	225177766	225177766	+	8.74999	NA	intron (NM_001373, intron 35 of 83)	THE1B-int|LTR|ERVL-MaLR	248105	NM_144989	127602	Hs.133977	NM_001373	ENSG00000185842	DNAH14	C1orf67|Dnahc14|HL-18|HL18	dynein axonemal heavy chain 14	protein-coding
MEIS1_in_B13ko_peak_1843	chr7	126275746	126275746	+	8.71937	NA	Intergenic	THE1D-int|LTR|ERVL-MaLR	782438	NR_030323	693177		NR_030323	ENSG00000207692	MIR592	MIRN592|hsa-mir-592|mir-592	microRNA 592	ncRNA
MEIS1_in_B13ko_peak_596	chr12	127176998	127176998	+	8.71853	NA	Intergenic	LTR10E|LTR|ERV1	-116601	NR_104646	101927592	Hs.385663	NR_104646	ENSG00000249345	LINC02405	-	long intergenic non-protein coding RNA 2405	ncRNA
MEIS1_in_B13ko_peak_1592	chr5	177561535	177561535	+	8.71853	NA	Intergenic	LTR13|LTR|ERVK	-6950	NR_024019	54540	Hs.484289	NM_019057	ENSG00000146067	FAM193B	IRIZIO	family with sequence similarity 193 member B	protein-coding
MEIS1_in_B13ko_peak_1093	chr2	51377241	51377241	+	8.71853	NA	intron (NR_135237, intron 3 of 10)	THE1C-int|LTR|ERVL-MaLR	344640	NR_135237	730100	Hs.640140	NR_135237	ENSG00000231918	LOC730100	-	uncharacterized LOC730100	ncRNA
MEIS1_in_B13ko_peak_622	chr13	41194578	41194578	+	8.71853	NA	promoter-TSS (NM_032138)	promoter-TSS (NM_032138)	-3	NM_032138	84078	Hs.63841	NM_032138	ENSG00000120696	KBTBD7	-	kelch repeat and BTB domain containing 7	protein-coding
MEIS1_in_B13ko_peak_779	chr16	10408990	10408990	+	8.71853	NA	intron (NM_024997, intron 1 of 11)	LTR10G|LTR|ERV1	-19878	NR_045815	80063	Hs.513343	NM_024997	ENSG00000166669	ATF7IP2	MCAF2	activating transcription factor 7 interacting protein 2	protein-coding
MEIS1_in_B13ko_peak_1476	chr4	56624804	56624804	+	8.71853	NA	Intergenic	THE1A-int|LTR|ERVL-MaLR	31718	NM_139211	84525	Hs.619396	NM_032495	ENSG00000171476	HOPX	CAMEO|HOD|HOP|LAGY|NECC1|OB1|SMAP31|TOTO	HOP homeobox	protein-coding
MEIS1_in_B13ko_peak_1236	chr21	44610527	44610527	+	8.71853	NA	intron (NM_144991, intron 1 of 11)	THE1A-int|LTR|ERVL-MaLR	-1552	NM_198695	386681	Hs.528021	NM_198695	ENSG00000187766	KRTAP10-8	KAP10.8|KRTAP18-8|KRTAP18.8	keratin associated protein 10-8	protein-coding
MEIS1_in_B13ko_peak_782	chr16	14289944	14289944	+	8.71853	NA	Intergenic	MamGypLTR3|LTR|Gypsy	-12344	NR_132983	100129781	Hs.190748	NR_132983		MIR193BHG	-	MIR193B host gene	ncRNA
MEIS1_in_B13ko_peak_1086	chr2	28390519	28390519	+	8.71853	NA	intron (NR_103831, intron 1 of 1)	CpG	-2393	NM_005253	2355	Hs.220971	NM_005253	ENSG00000075426	FOSL2	FRA2	FOS like 2, AP-1 transcription factor subunit	protein-coding
MEIS1_in_B13ko_peak_393	chr11	59551045	59551045	+	8.71853	NA	Intergenic	tRNA-Val-GTA|tRNA|tRNA	36132	NM_001004711	390199	Hs.553757	NM_001004711	ENSG00000172742	OR4D9	OR11-253	olfactory receptor family 4 subfamily D member 9	protein-coding
MEIS1_in_B13ko_peak_419	chr11	74827105	74827105	+	8.71853	NA	intron (NM_001098638, intron 4 of 5)	THE1D-int|LTR|ERVL-MaLR	78237	NM_001098638	254225	Hs.370145	NM_001098638	ENSG00000166439	RNF169	-	ring finger protein 169	protein-coding
MEIS1_in_B13ko_peak_1821	chr7	101882981	101882981	+	8.71853	NA	intron (NM_181552, intron 1 of 23)	intron (NM_181552, intron 1 of 23)	65379	NM_181552	1523	Hs.191482	NM_001913	ENSG00000257923	CUX1	CASP|CDP|CDP/Cut|CDP1|COY1|CUTL1|CUX|Clox|Cux/CDP|GOLIM6|Nbla10317|p100|p110|p200|p75	cut like homeobox 1	protein-coding
MEIS1_in_B13ko_peak_1318	chr3	32095716	32095716	+	8.71853	NA	Intergenic	L1MC4|LINE|L1	-10795	NM_015141	23171	Hs.82432	NM_015141	ENSG00000152642	GPD1L	GPD1-L	glycerol-3-phosphate dehydrogenase 1 like	protein-coding
MEIS1_in_B13ko_peak_1668	chr6	55993588	55993588	+	8.71853	NA	Intergenic	MSTA-int|LTR|ERVL-MaLR	98073	NM_001318753	81578	Hs.47629	NM_030820	ENSG00000124749	COL21A1	COLA1L|FP633	collagen type XXI alpha 1 chain	protein-coding
MEIS1_in_B13ko_peak_894	chr17	58631745	58631745	+	8.71853	NA	intron (NM_198393, intron 2 of 32)	U3|snRNA|snRNA	60310	NM_001201457	56155	Hs.390221	NM_031272	ENSG00000121101	TEX14	CT113|SPGF23	testis expressed 14, intercellular bridge forming factor	protein-coding
MEIS1_in_B13ko_peak_797	chr16	31472891	31472891	+	8.71853	NA	promoter-TSS (NM_015927)	promoter-TSS (NM_015927)	-314	NM_015927	7041	Hs.513530	NM_015927	ENSG00000140682	TGFB1I1	ARA55|HIC-5|HIC5|TSC-5	transforming growth factor beta 1 induced transcript 1	protein-coding
MEIS1_in_B13ko_peak_1030	chr19	45485464	45485464	+	8.71853	NA	3' UTR (NM_206901, exon 7 of 7)	3' UTR (NM_206901, exon 7 of 7)	7781	NM_206901	6253	Hs.47517	NM_005619	ENSG00000125744	RTN2	NSP2|NSPL1|NSPLI|SPG12	reticulon 2	protein-coding
MEIS1_in_B13ko_peak_1936	chr9	6371013	6371013	+	8.71853	NA	Intergenic	THE1-int|LTR|ERVL-MaLR	-42138	NR_046386	115426	Hs.493401	NM_152896	ENSG00000147854	UHRF2	NIRF|RNF107|TDRD23|URF2	ubiquitin like with PHD and ring finger domains 2	protein-coding
MEIS1_in_B13ko_peak_953	chr18	70205682	70205682	+	8.71853	NA	promoter-TSS (NM_001318520)	promoter-TSS (NM_001318520)	44	NM_001318520	25914	Hs.654809	NM_173630	ENSG00000176225	RTTN	MSSP	rotatin	protein-coding
MEIS1_in_B13ko_peak_1913	chr8	87569806	87569806	+	8.71853	NA	Intergenic	THE1C-int|LTR|ERVL-MaLR	304262	NM_152418	138009	Hs.371738	NM_152418	ENSG00000176566	DCAF4L2	WDR21C	DDB1 and CUL4 associated factor 4 like 2	protein-coding
MEIS1_in_B13ko_peak_498	chr12	49910086	49910086	+	8.71853	NA	non-coding (NR_026948, exon 3 of 3)	non-coding (NR_026948, exon 3 of 3)	1777	NR_026948	283332	Hs.127688	NR_026948	ENSG00000258135	LINC02396	-	long intergenic non-protein coding RNA 2396	ncRNA
MEIS1_in_B13ko_peak_952	chr18	69568320	69568320	+	8.71853	NA	intron (NM_152721, intron 2 of 7)	LTR18B|LTR|ERVL	98389	NR_134579	105372179	Hs.666269	NR_134579	ENSG00000264845	LOC105372179	-	uncharacterized LOC105372179	ncRNA
MEIS1_in_B13ko_peak_1308	chr3	13650710	13650710	+	8.71853	NA	promoter-TSS (NR_027103)	promoter-TSS (NR_027103)	-11	NR_027103	285375	Hs.319969	NR_027103	ENSG00000224514	LINC00620	-	long intergenic non-protein coding RNA 620	ncRNA
MEIS1_in_B13ko_peak_362	chr10	125953964	125953964	+	8.71853	NA	intron (NM_145235, intron 1 of 10)	LTR10B|LTR|ERV1	19309	NR_102707	101410540	Hs.557889	NR_102707	ENSG00000233409	FANK1-AS1	-	FANK1 antisense RNA 1	ncRNA
MEIS1_in_B13ko_peak_825	chr17	5182146	5182146	+	8.71853	NA	exon (NM_032530, exon 2 of 2)	exon (NM_032530, exon 2 of 2)	9737	NM_032530	84622	Hs.658402	NM_032530	ENSG00000180626	ZNF594	-	zinc finger protein 594	protein-coding
MEIS1_in_B13ko_peak_1025	chr19	43951160	43951160	+	8.71853	NA	promoter-TSS (NM_001297588)	promoter-TSS (NM_001297588)	-63	NM_001297589	7638	Hs.631598	NM_013359	ENSG00000159905	ZNF221	-	zinc finger protein 221	protein-coding
MEIS1_in_B13ko_peak_1230	chr21	28284043	28284043	+	8.71853	NA	Intergenic	Intergenic	-55376	NR_126012	101927973	Hs.570414	NR_126012	ENSG00000236532	LINC01695	-	long intergenic non-protein coding RNA 1695	ncRNA
MEIS1_in_B13ko_peak_684	chr14	60649244	60649244	+	8.71853	NA	5' UTR (NM_005982, exon 1 of 2)	5' UTR (NM_005982, exon 1 of 2)	193	NM_005982	6495	Hs.633506	NM_005982	ENSG00000126778	SIX1	BOS3|DFNA23|TIP39	SIX homeobox 1	protein-coding
MEIS1_in_B13ko_peak_728	chr15	45298208	45298208	+	8.71853	NA	Intergenic	THE1A-int|LTR|ERVL-MaLR	-18986	NR_120335	101928414		NR_120335	ENSG00000259520	LOC101928414	-	uncharacterized LOC101928414	ncRNA
MEIS1_in_B13ko_peak_677	chr14	49586611	49586611	+	8.71853	NA	promoter-TSS (NR_002715)	promoter-TSS (NR_002715)	31	NR_002715	6029		NR_002715	ENSG00000276168	RN7SL1	7L1a|7SL|RN7SL|RNSRP1	RNA, 7SL, cytoplasmic 1	scRNA
MEIS1_in_B13ko_peak_1511	chr4	168242202	168242202	+	8.71853	NA	intron (NM_017631, intron 30 of 37)	THE1B-int|LTR|ERVL-MaLR	76605	NM_017631	55601	Hs.591710	NM_017631	ENSG00000137628	DDX60	-	DExD/H-box helicase 60	protein-coding
MEIS1_in_B13ko_peak_1579	chr5	146447087	146447087	+	8.71853	NA	promoter-TSS (NM_006706)	promoter-TSS (NM_006706)	-223	NM_006706	10915	Hs.443465	NM_006706	ENSG00000113649	TCERG1	CA150|TAF2S|Urn1	transcription elongation regulator 1	protein-coding
MEIS1_in_B13ko_peak_1628	chr6	26328177	26328177	+	8.71853	NA	Intergenic	tRNA-Arg-CGY_|tRNA|tRNA	-36982	NM_007047	11118	Hs.376046	NM_007047	ENSG00000186470	BTN3A2	BT3.2|BTF4|BTN3.2|CD277	butyrophilin subfamily 3 member A2	protein-coding
MEIS1_in_B13ko_peak_676	chr14	45281952	45281952	+	8.71853	NA	Intergenic	MER11B|LTR|ERVK	-28550	NM_018353	55320	Hs.732769	NM_018353	ENSG00000129534	MIS18BP1	C14orf106|HSA242977|KNL2|M18BP1	MIS18 binding protein 1	protein-coding
MEIS1_in_B13ko_peak_1560	chr5	103721151	103721151	+	8.71853	NA	Intergenic	THE1D-int|LTR|ERVL-MaLR	-158350	NM_031438	83594	Hs.434289	NM_031438	ENSG00000112874	NUDT12	-	nudix hydrolase 12	protein-coding
MEIS1_in_B13ko_peak_844	chr17	15717087	15717087	+	8.71853	NA	exon (NM_001288645, exon 6 of 6)	exon (NM_001288645, exon 6 of 6)	-15190	NM_178571	353149	Hs.434123	NM_178571	ENSG00000214946	TBC1D26	-	TBC1 domain family member 26	protein-coding
MEIS1_in_B13ko_peak_1906	chr8	69795797	69795797	+	8.71853	NA	intron (NM_030958, intron 2 of 9)	MSTA-int|LTR|ERVL-MaLR	37372	NM_001146009	81796	Hs.152460	NM_030958	ENSG00000137571	SLCO5A1	OATP-J|OATP-RP4|OATP5A1|OATPJ|OATPRP4|SLC21A15	solute carrier organic anion transporter family member 5A1	protein-coding
MEIS1_in_B13ko_peak_803	chr16	68310939	68310939	+	8.71853	NA	promoter-TSS (NM_001184824)	promoter-TSS (NM_001184824)	26	NM_032178	84138	Hs.729520	NM_032178	ENSG00000103061	SLC7A6OS	-	solute carrier family 7 member 6 opposite strand	protein-coding
MEIS1_in_B13ko_peak_1985	chr9	128193050	128193050	+	8.71853	NA	promoter-TSS (NM_001257975)	promoter-TSS (NM_001257975)	-946	NM_001257975	25792	Hs.212395	NM_012127	ENSG00000148337	CIZ1	LSFR1|NP94|ZNF356	CDKN1A interacting zinc finger protein 1	protein-coding
MEIS1_in_B13ko_peak_2000	chr9	137721177	137721177	+	8.71853	NA	intron (NM_024757, intron 3 of 26)	intron (NM_024757, intron 3 of 26)	-41845	NR_024341	79813	Hs.495511	NM_024757	ENSG00000181090	EHMT1	EHMT1-IT1|EUHMTASE1|Eu-HMTase1|FP13812|GLP|GLP1|KLEFS1|KMT1D	euchromatic histone lysine methyltransferase 1	protein-coding
MEIS1_in_B13ko_peak_716	chr15	26082256	26082256	+	8.71853	NA	Intergenic	tRNA-Glu-GAG_|tRNA|tRNA	-33557	NR_038852	503519	Hs.371380	NR_038851	ENSG00000259150	LINC00929	-	long intergenic non-protein coding RNA 929	ncRNA
MEIS1_in_B13ko_peak_1584	chr5	170980749	170980749	+	8.71853	NA	intron (NM_022897, intron 14 of 27)	THE1B-int|LTR|ERVL-MaLR	118867	NM_022897	64901	Hs.410810	NM_022897	ENSG00000204764	RANBP17	-	RAN binding protein 17	protein-coding
MEIS1_in_B13ko_peak_1444	chr3_KI270784v1_alt	180920	180920	+	8.71853	NA	Intergenic	LTR13|LTR|ERVK	29638	NR_003291	348840	Hs.512227	NM_182631	ENSG00000226435	ANKRD18DP	-	ankyrin repeat domain 18D, pseudogene	pseudo
MEIS1_in_B13ko_peak_668	chr14	30095737	30095737	+	8.71853	NA	Intergenic	THE1B-int|LTR|ERVL-MaLR	-167995	NM_001330069	5587	Hs.508999	NM_002742	ENSG00000184304	PRKD1	CHDED|PKC-MU|PKCM|PKD|PRKCM	protein kinase D1	protein-coding
MEIS1_in_B13ko_peak_1323	chr3	45689014	45689014	+	8.71853	NA	promoter-TSS (NM_014016)	promoter-TSS (NM_014016)	-132	NR_033947	644714	Hs.712889	NR_033947		LIMD1-AS1	-	LIMD1 antisense RNA 1	ncRNA
MEIS1_in_B13ko_peak_703	chr14	103921602	103921602	+	8.71853	NA	promoter-TSS (NM_001127393)	promoter-TSS (NM_001127393)	-36	NM_001127393	9556	Hs.109052	NM_004894	ENSG00000156411	ATP5MPL	6.8PL|C14orf2|MLQ|MP68|PLPM	ATP synthase membrane subunit 6.8PL	protein-coding
MEIS1_in_B13ko_peak_859	chr17	38867661	38867661	+	8.71853	NA	Intergenic	tRNA-Cys-TGY|tRNA|tRNA	-2198	NM_001271608	3927	Hs.741156	NM_006148	ENSG00000002834	LASP1	Lasp-1|MLN50	LIM and SH3 protein 1	protein-coding
MEIS1_in_B13ko_peak_1112	chr2	101002118	101002118	+	8.71853	NA	promoter-TSS (NM_000993)	promoter-TSS (NM_000993)	-111	NM_001098577	6160	Hs.469473	NM_000993	ENSG00000071082	RPL31	L31	ribosomal protein L31	protein-coding
MEIS1_in_B13ko_peak_1263	chr22	35491735	35491735	+	8.71853	NA	Intergenic	Intergenic	-49570	NM_014310	23551	Hs.474711	NM_014310	ENSG00000100302	RASD2	MGC:4834|Rhes|TEM2	RASD family member 2	protein-coding
MEIS1_in_B13ko_peak_61	chr1	67384169	67384169	+	8.71853	NA	intron (NM_001258216, intron 13 of 13)	THE1C-int|LTR|ERVL-MaLR	46271	NM_001018068	26135	Hs.530412	NM_015640	ENSG00000142864	SERBP1	CGI-55|CHD3IP|HABP4L|PAI-RBP1|PAIRBP1	SERPINE1 mRNA binding protein 1	protein-coding
MEIS1_in_B13ko_peak_564	chr12	109093523	109093523	+	8.71853	NA	promoter-TSS (NM_001001655)	promoter-TSS (NM_001001655)	-35	NM_001205180	121642	Hs.374458	NM_001001655	ENSG00000189046	ALKBH2	ABH2	alkB homolog 2, alpha-ketoglutarate dependent dioxygenase	protein-coding
MEIS1_in_B13ko_peak_496	chr12	49130381	49130381	+	8.71853	NA	intron (NM_006082, intron 1 of 3)	CpG	1140	NM_006082	10376	Hs.524390	NM_006082	ENSG00000123416	TUBA1B	K-ALPHA-1	tubulin alpha 1b	protein-coding
MEIS1_in_B13ko_peak_78	chr1	116743754	116743754	+	8.71853	NA	Intergenic	LTR10B1|LTR|ERV1	-10676	NM_001328609	914	Hs.523500	NM_001767	ENSG00000116824	CD2	LFA-2|SRBC|T11	CD2 molecule	protein-coding
MEIS1_in_B13ko_peak_1111	chr2	98321261	98321261	+	8.71853	NA	Intergenic	THE1B-int|LTR|ERVL-MaLR	-24894	NM_001298	1261	Hs.234785	NM_001298	ENSG00000144191	CNGA3	ACHM2|CCNC1|CCNCa|CCNCalpha|CNCG3|CNG3	cyclic nucleotide gated channel alpha 3	protein-coding
MEIS1_in_B13ko_peak_1725	chr7	4416626	4416626	+	8.71853	NA	Intergenic	L3|LINE|CR1	-265673	NM_001037165	221937	Hs.487393	NM_001037165	ENSG00000164916	FOXK1	FOXK1L	forkhead box K1	protein-coding
MEIS1_in_B13ko_peak_821	chr17	1739049	1739049	+	8.71853	NA	TTS (NM_001163673)	TTS (NM_001163673)	-3787	NM_001165921	5345	Hs.159509	NM_000934	ENSG00000167711	SERPINF2	A2AP|AAP|ALPHA-2-PI|API|PLI	serpin family F member 2	protein-coding
MEIS1_in_B13ko_peak_350	chr10	94363081	94363081	+	8.71853	NA	promoter-TSS (NM_022451)	promoter-TSS (NM_022451)	-105	NM_022451	64318	Hs.74899	NM_022451	ENSG00000173145	NOC3L	AD24|C10orf117|FAD24	NOC3 like DNA replication regulator	protein-coding
MEIS1_in_B13ko_peak_1023	chr19	41135571	41135571	+	8.71853	NA	Intergenic	CpG	21139	NR_135528	1572	Hs.558318	NM_000774	ENSG00000197446	CYP2F1	C2F1|CYP2F|CYPIIF1	cytochrome P450 family 2 subfamily F member 1	protein-coding
MEIS1_in_B13ko_peak_1079	chr2	10014073	10014073	+	8.71853	NA	Intergenic	CpG	29328	NR_135558	101929882	Hs.405158	NR_135558		LOC101929882	-	uncharacterized LOC101929882	ncRNA
MEIS1_in_B13ko_peak_1266	chr22	38681931	38681931	+	8.71853	NA	promoter-TSS (NM_020243)	promoter-TSS (NM_020243)	-18	NM_020243	56993	Hs.595072	NM_020243	ENSG00000100216	TOMM22	1C9-2|MST065|MSTP065|TOM22	translocase of outer mitochondrial membrane 22	protein-coding
MEIS1_in_B13ko_peak_954	chr18	70206000	70206000	+	8.71853	NA	promoter-TSS (NM_001318520)	promoter-TSS (NM_001318520)	-274	NM_173630	25914	Hs.654809	NM_173630	ENSG00000176225	RTTN	MSSP	rotatin	protein-coding
MEIS1_in_B13ko_peak_37	chr1	27322158	27322158	+	8.71853	NA	promoter-TSS (NR_037576)	promoter-TSS (NR_037576)	13	NR_037580	84065	Hs.469171	NM_032125	ENSG00000186501	TMEM222	C1orf160	transmembrane protein 222	protein-coding
MEIS1_in_B13ko_peak_1231	chr21	28600260	28600260	+	8.71853	NA	Intergenic	THE1B-int|LTR|ERVL-MaLR	60942	NR_026553	118421	Hs.438549	NR_026552	ENSG00000226935	LINC00161	C21orf100|Linc-USP16|NCRNA00161	long intergenic non-protein coding RNA 161	ncRNA
MEIS1_in_B13ko_peak_1618	chr6	13874004	13874004	+	8.71853	NA	Intergenic	CpG	-50442	NM_001165034	221687	Hs.111164	NM_152737	ENSG00000180537	RNF182	-	ring finger protein 182	protein-coding
MEIS1_in_B13ko_peak_1882	chr7_KI270807v1_alt	35930	35930	+	8.71853	NA	NA	Intergenic	NA	NA
MEIS1_in_B13ko_peak_2042	chrX	74924463	74924463	+	8.71853	NA	intron (NM_001008537, intron 1 of 3)	CpG	989	NM_001008537	340533	Hs.124128	NM_001008537	ENSG00000050030	NEXMIF	KIAA2022|KIDLIA|MRX98|XPN	neurite extension and migration factor	protein-coding
MEIS1_in_B13ko_peak_1089	chr2	31694063	31694063	+	8.71853	NA	Intergenic	HUERS-P3-int|LTR|ERV1	-113092	NM_000348	6716	Hs.458345	NM_000348	ENSG00000277893	SRD5A2	-	steroid 5 alpha-reductase 2	protein-coding
MEIS1_in_B13ko_peak_1114	chr2	110929964	110929964	+	8.71853	NA	intron (NM_001142807, intron 11 of 17)	THE1B-int|LTR|ERVL-MaLR	185624	NR_122074	400997	Hs.652337	NR_122074	ENSG00000204581	ACOXL-AS1	-	ACOXL antisense RNA 1	ncRNA
MEIS1_in_B13ko_peak_1969	chr9	93338646	93338646	+	8.71853	NA	intron (NM_001098808, intron 1 of 4)	THE1D-int|LTR|ERVL-MaLR	7768	NM_001098808	445577	Hs.575636	NM_001098808	ENSG00000204352	C9orf129	bA165J3.3	chromosome 9 open reading frame 129	protein-coding
MEIS1_in_B13ko_peak_1550	chr5	71715124	71715124	+	8.71853	NA	Intergenic	Intergenic	-4039	NM_004291	9607	Hs.1707	NM_004291	ENSG00000164326	CARTPT	CART	CART prepropeptide	protein-coding
MEIS1_in_B13ko_peak_1418	chr3	180161933	180161933	+	8.71853	NA	Intergenic	5S|rRNA|rRNA	-124880	NM_001256750	51555	Hs.235331	NM_016559	ENSG00000114757	PEX5L	PEX5R|PEX5RP|PXR2|PXR2B|TRIP8b	peroxisomal biogenesis factor 5 like	protein-coding
MEIS1_in_B13ko_peak_1090	chr2	36967912	36967912	+	8.71853	NA	Intergenic	Intergenic	-1440	NM_003162	6801	Hs.127486	NM_003162	ENSG00000115808	STRN	PPP2R6A|SG2NA|STRN1	striatin	protein-coding
MEIS1_in_B13ko_peak_705	chr14	106883336	106883336	+	8.71853	NA	Intergenic	TAR1|Satellite|telo	-32337	NR_049827	100847062		NR_049827	ENSG00000265929	MIR5195	-	microRNA 5195	ncRNA
MEIS1_in_B13ko_peak_241	chr1	201309590	201309590	+	8.71853	NA	intron (NM_001005337, intron 2 of 13)	MamRTE1|LINE|RTE-BovB	26138	NM_000299	5317	Hs.497350	NM_000299	ENSG00000081277	PKP1	B6P	plakophilin 1	protein-coding
MEIS1_in_B13ko_peak_357	chr10	102226435	102226435	+	8.71853	NA	5' UTR (NM_152310, exon 1 of 4)	5' UTR (NM_152310, exon 1 of 4)	157	NM_152310	83401	Hs.302130	NM_152310	ENSG00000119915	ELOVL3	CIG-30|CIG30	ELOVL fatty acid elongase 3	protein-coding
MEIS1_in_B13ko_peak_682	chr14	55889467	55889467	+	8.71853	NA	Intergenic	Intergenic	-92793	NR_026797	645687	Hs.569345	NR_026796		LINC00520	C14orf34	long intergenic non-protein coding RNA 520	ncRNA
MEIS1_in_B13ko_peak_1928	chr8	142710396	142710396	+	8.71853	NA	intron (NR_038925, intron 1 of 2)	LTR13|LTR|ERVK	10285	NM_017527	54742	Hs.69517	NM_017527	ENSG00000160886	LY6K	CT97|HSJ001348|URLC10|ly-6K	lymphocyte antigen 6 family member K	protein-coding
MEIS1_in_B13ko_peak_863	chr17	39606236	39606236	+	8.71695	NA	exon (NM_006160, exon 2 of 2)	exon (NM_006160, exon 2 of 2)	1686	NM_006160	4761	Hs.322431	NM_006160	ENSG00000171532	NEUROD2	NDRF|bHLHa1	neuronal differentiation 2	protein-coding
MEIS1_in_B13ko_peak_1017	chr19	38364580	38364580	+	8.71695	NA	intron (NM_021185, intron 20 of 28)	SVA_A|Retroposon|SVA	-9970	NM_002812	5714	Hs.78466	NM_002812	ENSG00000099341	PSMD8	HEL-S-91n|HIP6|HYPF|Nin1p|Rpn12|S14|p31	proteasome 26S subunit, non-ATPase 8	protein-coding
MEIS1_in_B13ko_peak_1727	chr7	6691943	6691943	+	8.69444	NA	exon (NM_006956, exon 6 of 6)	exon (NM_006956, exon 6 of 6)	14992	NM_006956	7559	Hs.431471	NM_006956	ENSG00000164631	ZNF12	GIOT-3|HZF11|KOX3|ZNF325	zinc finger protein 12	protein-coding
MEIS1_in_B13ko_peak_1794	chr7	87245851	87245851	+	8.64304	NA	Intergenic	THE1A-int|LTR|ERVL-MaLR	-25264	NM_001329474	79161	Hs.619593	NM_024315	ENSG00000135185	TMEM243	C7orf23|MM-TRAG|MMTRAG	transmembrane protein 243	protein-coding
MEIS1_in_B13ko_peak_1573	chr5	128353616	128353616	+	8.54063	NA	intron (NM_001999, intron 20 of 64)	intron (NM_001999, intron 20 of 64)	184426	NM_001999	2201	Hs.519294	NM_001999	ENSG00000138829	FBN2	CCA|DA9|EOMD	fibrillin 2	protein-coding
MEIS1_in_B13ko_peak_1927	chr8	142645724	142645724	+	8.54063	NA	Intergenic	MER4-int|LTR|ERV1	7128	NR_134305	101928087	Hs.126101	NR_134305	ENSG00000277332	LOC101928087	-	uncharacterized LOC101928087	ncRNA
MEIS1_in_B13ko_peak_1719	chr7	767765	767765	+	8.54063	NA	intron (NR_075098, intron 8 of 12)	CpG	-40089	NM_001164759	5575	Hs.520851	NM_002735	ENSG00000188191	PRKAR1B	PRKAR1	protein kinase cAMP-dependent type I regulatory subunit beta	protein-coding
MEIS1_in_B13ko_peak_1752	chr7	38160344	38160344	+	8.54063	NA	Intergenic	LTR22A|LTR|ERVK	-17862	NM_032016	83930	Hs.309753	NM_032016	ENSG00000010270	STARD3NL	MENTHO	STARD3 N-terminal like	protein-coding
MEIS1_in_B13ko_peak_1035	chr19	47447894	47447894	+	8.52903	NA	exon (NM_015063, exon 4 of 10)	exon (NM_015063, exon 4 of 10)	24156	NM_015063	6543	Hs.172884	NM_015063	ENSG00000118160	SLC8A2	NCX2	solute carrier family 8 member A2	protein-coding
MEIS1_in_B13ko_peak_2002	chrUn_GL000195v1	30820	30820	+	8.52903	NA	Intergenic	Intergenic	55915	NM_001242480	389831	Hs.743984	NM_001242480	ENSG00000276256	LOC389831	-	uncharacterized LOC389831	protein-coding
MEIS1_in_B13ko_peak_722	chr15	41621968	41621968	+	8.52903	NA	Intergenic	CpG	-38444	NM_001080541	23269	Hs.187569	NM_001080541	ENSG00000174197	MGA	MAD5|MXD5	MGA, MAX dimerization protein	protein-coding
MEIS1_in_B13ko_peak_867	chr17	42679918	42679918	+	8.52903	NA	exon (NM_016602, exon 2 of 2)	exon (NM_016602, exon 2 of 2)	1909	NM_016602	2826	Hs.744542	NM_016602	ENSG00000184451	CCR10	GPR2	C-C motif chemokine receptor 10	protein-coding
MEIS1_in_B13ko_peak_163	chr1	154714233	154714233	+	8.52903	NA	intron (NM_002249, intron 6 of 7)	(GT)n|Simple_repeat|Simple_repeat	-86253	NM_001025107	103	Hs.12341	NM_001111	ENSG00000160710	ADAR	ADAR1|AGS6|DRADA|DSH|DSRAD|G1P1|IFI-4|IFI4|K88DSRBP|P136	adenosine deaminase, RNA specific	protein-coding
MEIS1_in_B13ko_peak_440	chr11	130916528	130916528	+	8.52903	NA	promoter-TSS (NM_001301089)	promoter-TSS (NM_001301089)	-41	NM_001347918	399979	Hs.444024	NM_014758	ENSG00000120451	SNX19	CHET8	sorting nexin 19	protein-coding
MEIS1_in_B13ko_peak_1832	chr7	115133690	115133690	+	8.52903	NA	intron (NR_126407, intron 2 of 4)	intron (NR_126407, intron 2 of 4)	54732	NR_120521	102724386	Hs.352357	NR_120521	ENSG00000225535	LINC01393	-	long intergenic non-protein coding RNA 1393	ncRNA
MEIS1_in_B13ko_peak_1338	chr3	87615685	87615685	+	8.52903	NA	Intergenic	LTR10B1|LTR|ERV1	-177082	NM_001322209	3355	Hs.248136	NM_000866	ENSG00000179097	HTR1F	5-HT-1F|5-HT1F|5HT6|HTR1EL|MR77	5-hydroxytryptamine receptor 1F	protein-coding
MEIS1_in_B13ko_peak_215	chr1	180074047	180074047	+	8.52055	NA	intron (NM_014810, intron 27 of 37)	intron (NM_014810, intron 27 of 37)	-80786	NM_001004128	5768	Hs.744925	NM_002826	ENSG00000116260	QSOX1	Q6|QSCN6	quiescin sulfhydryl oxidase 1	protein-coding
MEIS1_in_B13ko_peak_65	chr1	84287558	84287558	+	8.50547	NA	Intergenic	MER11B|LTR|ERVK	-10808	NM_001010971	148418	Hs.591445	NM_001010971	ENSG00000203943	SAMD13	HSD-41|HSD-42	sterile alpha motif domain containing 13	protein-coding
MEIS1_in_B13ko_peak_152	chr1	151281292	151281292	+	8.48411	NA	promoter-TSS (NM_001304764)	promoter-TSS (NM_001304764)	-263	NM_001304764	57592	Hs.186756	NM_020832	ENSG00000143373	ZNF687	PDB6	zinc finger protein 687	protein-coding
MEIS1_in_B13ko_peak_652	chr13	114352882	114352882	+	8.47849	NA	Intergenic	TAR1|Satellite|telo	-18934	NR_126391	104355150	Hs.569217	NR_126391		LINC01054	-	long intergenic non-protein coding RNA 1054	ncRNA
MEIS1_in_B13ko_peak_562	chr12	107319431	107319431	+	8.47019	NA	exon (NM_001018072, exon 1 of 17)	exon (NM_001018072, exon 1 of 17)	1011	NM_001347943	121551	Hs.271272	NM_152322	ENSG00000151136	BTBD11	ABTB2B	BTB domain containing 11	protein-coding
MEIS1_in_B13ko_peak_179	chr1	160032019	160032019	+	8.45028	NA	promoter-TSS (NM_145167)	promoter-TSS (NM_145167)	-26	NM_145167	93183	Hs.552810	NM_145167	ENSG00000143315	PIGM	GPI-MT-I	phosphatidylinositol glycan anchor biosynthesis class M	protein-coding
MEIS1_in_B13ko_peak_1411	chr3	174955786	174955786	+	8.44877	NA	intron (NM_207015, intron 1 of 13)	MER5A|DNA|hAT-Charlie	96465	NM_207015	254827	Hs.565848	NM_207015	ENSG00000177694	NAALADL2	-	N-acetylated alpha-linked acidic dipeptidase like 2	protein-coding
MEIS1_in_B13ko_peak_483	chr12	31729355	31729355	+	8.44877	NA	promoter-TSS (NM_001113402)	promoter-TSS (NM_001113402)	-181	NM_001113402	196394	Hs.585084	NM_001113402	ENSG00000151743	AMN1	-	antagonist of mitotic exit network 1 homolog	protein-coding
MEIS1_in_B13ko_peak_1702	chr6	142574215	142574215	+	8.44877	NA	intron (NR_027312, intron 1 of 2)	THE1D-int|LTR|ERVL-MaLR	63621	NR_027311	153910	Hs.350819	NR_027311	ENSG00000236366	LOC153910	-	uncharacterized LOC153910	ncRNA
MEIS1_in_B13ko_peak_77	chr1	109454698	109454698	+	8.44877	NA	Intergenic	MER41-int|LTR|ERV1	-11780	NM_001040709	284612	Hs.528366	NM_001006603	ENSG00000143028	SYPL2	MG29	synaptophysin like 2	protein-coding
MEIS1_in_B13ko_peak_800	chr16	57300517	57300517	+	8.44877	NA	Intergenic	tRNA-Leu-CTG|tRNA|tRNA	-15845	NM_015993	51090	Hs.632215	NM_015993	ENSG00000102934	PLLP	PMLP|TM4SF11	plasmolipin	protein-coding
MEIS1_in_B13ko_peak_60	chr1	67067861	67067861	+	8.44877	NA	Intergenic	THE1C-int|LTR|ERVL-MaLR	-13464	NM_015139	23169	Hs.213642	NM_015139	ENSG00000116704	SLC35D1	SHNKND|UGTREL7	solute carrier family 35 member D1	protein-coding
MEIS1_in_B13ko_peak_1761	chr7	45691323	45691323	+	8.44877	NA	intron (NM_021116, intron 14 of 19)	intron (NM_021116, intron 14 of 19)	77695	NR_024271	641977	Hs.723477	NR_024271	ENSG00000214765	SEPT7P2	SEPT13|SEPT7B	septin 7 pseudogene 2	pseudo
MEIS1_in_B13ko_peak_429	chr11	94707446	94707446	+	8.44877	NA	intron (NR_135096, intron 1 of 6)	intron (NR_135096, intron 1 of 6)	32909	NR_135093	105369438	Hs.568921	NR_135093	ENSG00000255929	LOC105369438	-	uncharacterized LOC105369438	ncRNA
MEIS1_in_B13ko_peak_689	chr14	68794527	68794527	+	8.44877	NA	promoter-TSS (NM_001244698)	promoter-TSS (NM_001244698)	-613	NM_004926	677	Hs.85155	NM_004926	ENSG00000185650	ZFP36L1	BRF1|Berg36|ERF-1|ERF1|RNF162B|TIS11B|cMG1	ZFP36 ring finger protein like 1	protein-coding
MEIS1_in_B13ko_peak_1423	chr3	184248911	184248911	+	8.44877	NA	promoter-TSS (NM_005787)	promoter-TSS (NM_005787)	60	NM_005787	10195	Hs.478481	NM_005787	ENSG00000214160	ALG3	CDG1D|CDGS4|CDGS6|D16Ertd36e|NOT56L|Not56|not	ALG3, alpha-1,3- mannosyltransferase	protein-coding
MEIS1_in_B13ko_peak_1698	chr6	139375379	139375379	+	8.44877	NA	promoter-TSS (NM_006079)	promoter-TSS (NM_006079)	-729	NM_006079	10370	Hs.82071	NM_006079	ENSG00000164442	CITED2	ASD8|MRG-1|MRG1|P35SRJ|VSD2	Cbp/p300 interacting transactivator with Glu/Asp rich carboxy-terminal domain 2	protein-coding
MEIS1_in_B13ko_peak_488	chr12	38316674	38316674	+	8.44877	NA	promoter-TSS (NM_001013620)	promoter-TSS (NM_001013620)	-81	NM_001308340	144245	Hs.259305	NM_001013620	ENSG00000175548	ALG10B	ALG10|KCR1	ALG10B, alpha-1,2-glucosyltransferase	protein-coding
MEIS1_in_B13ko_peak_1974	chr9	108659861	108659861	+	8.44877	NA	Intergenic	MSTA-int|LTR|ERVL-MaLR	196134	NM_006686	10880	Hs.534390	NM_006686	ENSG00000148156	ACTL7B	Tact1	actin like 7B	protein-coding
MEIS1_in_B13ko_peak_1903	chr8	66114108	66114108	+	8.44877	NA	Intergenic	Intergenic	-12935	NM_184087	84675	Hs.85524	NM_033058	ENSG00000147573	TRIM55	MURF-2|RNF29|muRF2	tripartite motif containing 55	protein-coding
MEIS1_in_B13ko_peak_666	chr14	24007046	24007046	+	8.44877	NA	promoter-TSS (NM_001277864)	promoter-TSS (NM_001277864)	37	NR_102687	728635	Hs.647569	NM_001082488		DHRS4L1	SDR25C4	dehydrogenase/reductase 4 like 1	protein-coding
MEIS1_in_B13ko_peak_1305	chr3	7106865	7106865	+	8.44877	NA	intron (NM_181874, intron 1 of 10)	intron (NM_181874, intron 1 of 10)	-212848	NR_131906	105376946	Hs.616038	NR_131906	ENSG00000237665	GRM7-AS2	-	GRM7 antisense RNA 2	ncRNA
MEIS1_in_B13ko_peak_436	chr11	116835908	116835908	+	8.44877	NA	promoter-TSS (NR_126362)	promoter-TSS (NR_126362)	-209	NR_126362	104326055	Hs.627813	NR_126362	ENSG00000235910	APOA1-AS	-	APOA1 antisense RNA	ncRNA
MEIS1_in_B13ko_peak_947	chr18	59139818	59139818	+	8.44877	NA	promoter-TSS (NM_001307941)	promoter-TSS (NM_001307941)	-39	NM_033280	90701	Hs.45107	NM_033280	ENSG00000166562	SEC11C	SEC11L3|SPC21|SPCS4C	SEC11 homolog C, signal peptidase complex subunit	protein-coding
MEIS1_in_B13ko_peak_1311	chr3	19619114	19619114	+	8.44877	NA	Intergenic	THE1D-int|LTR|ERVL-MaLR	-304183	NR_039954	100616291		NR_039954	ENSG00000271898	MIR4791	mir-4791	microRNA 4791	ncRNA
MEIS1_in_B13ko_peak_1061	chr19	58562747	58562747	+	8.43961	NA	exon (NM_198055, exon 6 of 6)	exon (NM_198055, exon 6 of 6)	3561	NR_027334	100131691	Hs.743767	NR_027334	ENSG00000267858	MZF1-AS1	-	MZF1 antisense RNA 1	ncRNA
MEIS1_in_B13ko_peak_1890	chr8	30728051	30728051	+	8.43917	NA	promoter-TSS (NM_001195103)	promoter-TSS (NM_001195103)	-82	NM_000637	2936	Hs.271510	NM_000637	ENSG00000104687	GSR	GR|HEL-75|HEL-S-122m	glutathione-disulfide reductase	protein-coding
MEIS1_in_B13ko_peak_559	chr12	102354483	102354483	+	8.43857	NA	Intergenic	THE1C-int|LTR|ERVL-MaLR	124168	NM_001111284	3479	Hs.160562	NM_000618	ENSG00000017427	IGF1	IGF-I|IGFI|MGF	insulin like growth factor 1	protein-coding
MEIS1_in_B13ko_peak_649	chr13	113210016	113210016	+	8.42752	NA	exon (NM_001008895, exon 2 of 20)	exon (NM_001008895, exon 2 of 20)	511	NM_001008895	8451	Hs.339735	NM_003589	ENSG00000139842	CUL4A	-	cullin 4A	protein-coding
MEIS1_in_B13ko_peak_1574	chr5	128504218	128504218	+	8.39926	NA	intron (NM_001999, intron 5 of 64)	THE1B-int|LTR|ERVL-MaLR	33824	NM_001999	2201	Hs.519294	NM_001999	ENSG00000138829	FBN2	CCA|DA9|EOMD	fibrillin 2	protein-coding
MEIS1_in_B13ko_peak_1085	chr2	27968462	27968462	+	8.39926	NA	intron (NR_137440, intron 3 of 13)	THE1B-int|LTR|ERVL-MaLR	-27905	NR_036230	100422965		NR_036230	ENSG00000265321	MIR4263	-	microRNA 4263	ncRNA
MEIS1_in_B13ko_peak_787	chr16	22297155	22297155	+	8.39396	NA	promoter-TSS (NM_001258033)	promoter-TSS (NM_001258033)	-220	NM_001258035	55718	Hs.460298	NM_018119	ENSG00000058600	POLR3E	RPC5|SIN	RNA polymerase III subunit E	protein-coding
MEIS1_in_B13ko_peak_551	chr12	95003719	95003719	+	8.39396	NA	promoter-TSS (NM_001258338)	promoter-TSS (NM_001258338)	-6	NM_001258338	55967	Hs.506374	NM_018838	ENSG00000184752	NDUFA12	B17.2|DAP13	NADH:ubiquinone oxidoreductase subunit A12	protein-coding
MEIS1_in_B13ko_peak_1119	chr2	113602114	113602114	+	8.39396	NA	promoter-TSS (NR_024005)	promoter-TSS (NR_024005)	-538	NR_024005	84771	Hs.712940	NR_024004		DDX11L2	-	DEAD/H-box helicase 11 like 2	pseudo
MEIS1_in_B13ko_peak_943	chr18	47184826	47184826	+	8.39396	NA	Intergenic	LTR18A|LTR|ERVL	-8452	NM_016097	51124	Hs.130917	NM_016097	ENSG00000134049	IER3IP1	HSPC039|MEDS|PRO2309	immediate early response 3 interacting protein 1	protein-coding
MEIS1_in_B13ko_peak_1644	chr6	27280311	27280311	+	8.39396	NA	Intergenic	tRNA-Val-GTG|tRNA|tRNA	31921	NM_033482	94026	Hs.729955	NM_033482	ENSG00000158553	POM121L2	POM121-L|POM121L	POM121 transmembrane nucleoporin like 2	protein-coding
MEIS1_in_B13ko_peak_1895	chr8	43110457	43110457	+	8.39396	NA	intron (NM_032237, intron 4 of 4)	MER41-int|LTR|ERV1	16951	NM_032237	84197	Hs.491646	NM_032237	ENSG00000185900	POMK	MDDGA12|MDDGC12|SGK196	protein-O-mannose kinase	protein-coding
MEIS1_in_B13ko_peak_311	chr1	246968643	246968643	+	8.39396	NA	intron (NM_001204221, intron 4 of 5)	MSTA-int|LTR|ERVL-MaLR	-36665	NM_001323342	25909	Hs.300887	NM_015446	ENSG00000153207	AHCTF1	ELYS|MST108|MSTP108|TMBS62	AT-hook containing transcription factor 1	protein-coding
MEIS1_in_B13ko_peak_1652	chr6	27631470	27631470	+	8.39396	NA	Intergenic	tRNA-Ile-ATA|tRNA|tRNA	-62565	NR_038294	100507173	Hs.635987	NR_038292	ENSG00000281706	LINC01012	-	long intergenic non-protein coding RNA 1012	ncRNA
MEIS1_in_B13ko_peak_461	chr12	9354313	9354313	+	8.39396	NA	Intergenic	LTR10A|LTR|ERV1	-13151	NR_120479	101930452	Hs.734183	NR_120479	ENSG00000260423	LINC02367	-	long intergenic non-protein coding RNA 2367	ncRNA
MEIS1_in_B13ko_peak_172	chr1	156505361	156505361	+	8.39396	NA	Intergenic	CpG	-4519	NM_005920	4209	Hs.314327	NM_005920	ENSG00000116604	MEF2D	-	myocyte enhancer factor 2D	protein-coding
MEIS1_in_B13ko_peak_316	chr1	247126389	247126389	+	8.38311	NA	intron (NM_001243740, intron 3 of 3)	CpG	-13972	NM_207401	388759	Hs.456511	NM_207401		C1orf229	-	chromosome 1 open reading frame 229	protein-coding
MEIS1_in_B13ko_peak_262	chr1	211259146	211259146	+	8.35651	NA	promoter-TSS (NM_001136225)	promoter-TSS (NM_001136225)	-220	NM_001136224	55758	Hs.356399	NM_018254	ENSG00000117625	RCOR3	-	REST corepressor 3	protein-coding
MEIS1_in_B13ko_peak_1354	chr3	120039830	120039830	+	8.3509	NA	intron (NM_002093, intron 1 of 11)	LTR10G|LTR|ERV1	54587	NM_001146156	2932	Hs.445733	NM_002093	ENSG00000082701	GSK3B	-	glycogen synthase kinase 3 beta	protein-coding
MEIS1_in_B13ko_peak_823	chr17	2401628	2401628	+	8.28178	NA	promoter-TSS (NM_020310)	promoter-TSS (NM_020310)	-664	NM_020310	4335	Hs.626579	NM_020310	ENSG00000070444	MNT	MAD6|MXD6|ROX|bHLHd3	MAX network transcriptional repressor	protein-coding
MEIS1_in_B13ko_peak_1860	chr7	148987143	148987143	+	8.28178	NA	promoter-TSS (NR_130107)	promoter-TSS (NR_130107)	105	NR_004391	6084		NR_004391	ENSG00000201098	RNY1	HY1|Y1	RNA, Ro-associated Y1	ncRNA
MEIS1_in_B13ko_peak_489	chr12	40581857	40581857	+	8.28178	NA	Intergenic	THE1D-int|LTR|ERVL-MaLR	-110585	NM_001256063	1272	Hs.143434	NM_001843	ENSG00000018236	CNTN1	F3|GP135|MYPCN	contactin 1	protein-coding
MEIS1_in_B13ko_peak_565	chr12	109312108	109312108	+	8.25863	NA	Intergenic	Intergenic	-2888	NM_213596	121643	Hs.528316	NM_213596	ENSG00000139445	FOXN4	-	forkhead box N4	protein-coding
MEIS1_in_B13ko_peak_1193	chr21	8405788	8405788	+	8.23608	NA	intron (NR_038958, intron 2 of 6).2	AluSz6|SINE|Alu	10181	NR_003285	100008587	Hs.426704	NR_003285		RNA5-8SN5	RN5-8S1|RNA5-8S5	RNA, 5.8S ribosomal N5	rRNA
MEIS1_in_B13ko_peak_1955	chr9	41273962	41273962	+	8.22279	NA	Intergenic	CpG	-40127	NR_039689	100616194		NR_039689	ENSG00000266017	MIR4477B	-	microRNA 4477b	ncRNA
MEIS1_in_B13ko_peak_1265	chr22	38214703	38214703	+	8.21246	NA	exon (NM_001161572, exon 3 of 3)	exon (NM_001161572, exon 3 of 3)	10017	NR_132774	106635525		NR_132774		SNORA92	-	small nucleolar RNA, H/ACA box 92	snoRNA
MEIS1_in_B13ko_peak_667	chr14	24316509	24316509	+	8.21246	NA	exon (NM_181657, exon 2 of 2)	exon (NM_181657, exon 2 of 2)	3402	NM_181657	1241	Hs.567248	NM_181657	ENSG00000213903	LTB4R	BLT1|BLTR|CMKRL1|GPR16|LTB4R1|LTBR1|P2RY7|P2Y7	leukotriene B4 receptor	protein-coding
MEIS1_in_B13ko_peak_1429	chr3	193593169	193593169	+	8.16182	NA	promoter-TSS (NM_015560)	promoter-TSS (NM_015560)	25	NM_130832	4976	Hs.594504	NM_015560	ENSG00000198836	OPA1	BERHS|MGM1|MTDPS14|NPG|NTG|largeG	OPA1, mitochondrial dynamin like GTPase	protein-coding
MEIS1_in_B13ko_peak_2004	chrUn_GL000214v1	64367	64367	+	8.09573	NA	NA	Intergenic	NA	NA
MEIS1_in_B13ko_peak_614	chr13	21671042	21671042	+	8.09573	NA	promoter-TSS (NM_002010)	promoter-TSS (NM_002010)	-34	NM_002010	2254	Hs.111	NM_002010	ENSG00000102678	FGF9	FGF-9|GAF|HBFG-9|HBGF-9|SYNS3	fibroblast growth factor 9	protein-coding
MEIS1_in_B13ko_peak_714	chr14_KI270724v1_random	15738	15738	+	8.06754	NA	NA	Intergenic	NA	NA
MEIS1_in_B13ko_peak_188	chr1	161447302	161447302	+	8.04449	NA	Intergenic	CpG	-58113	NM_021642	2212	Hs.352642	NM_021642	ENSG00000143226	FCGR2A	CD32|CD32A|CDw32|FCG2|FCGR2|FCGR2A1|FcGR|IGFR2	Fc fragment of IgG receptor IIa	protein-coding
MEIS1_in_B13ko_peak_641	chr13	90547460	90547460	+	7.98114	NA	Intergenic	THE1B-int|LTR|ERVL-MaLR	54172	NR_120414	101927224	Hs.385801	NR_120414		LINC01049	-	long intergenic non-protein coding RNA 1049	ncRNA
MEIS1_in_B13ko_peak_1215	chr21	8993010	8993010	+	7.97196	NA	Intergenic	Intergenic	5640	NR_128714
MEIS1_in_B13ko_peak_2018	chrUn_GL000220v1	132101	132101	+	7.96909	NA	Intergenic	(TCTC)n|Simple_repeat|Simple_repeat	-16603	NR_128717	103504733		NR_128717	ENSG00000275692	MIR6724-4	hsa-mir-6724-4	microRNA 6724-4	ncRNA
MEIS1_in_B13ko_peak_291	chr1	234724366	234724366	+	7.96792	NA	intron (NR_038856, intron 1 of 2)	intron (NR_038856, intron 1 of 2)	324	NR_038856	100506810	Hs.586634	NR_038856	ENSG00000227630	LINC01132	-	long intergenic non-protein coding RNA 1132	ncRNA
MEIS1_in_B13ko_peak_1779	chr7	72954826	72954826	+	7.9442	NA	promoter-TSS (NR_033323)	promoter-TSS (NR_033323)	-63	NR_033323	260294	Hs.510927	NM_148936	ENSG00000106133	NSUN5P2	NOL1R2|NSUN5C|WBSCR20B|WBSCR20C	NOP2/Sun RNA methyltransferase family member 5 pseudogene 2	pseudo
MEIS1_in_B13ko_peak_324	chr1	248946216	248946216	+	7.93579	NA	Intergenic	(AGGGTT)n|Simple_repeat|Simple_repeat	39973	NM_001017434	267002	Hs.602037	NM_170725	ENSG00000185220	PGBD2	-	piggyBac transposable element derived 2	protein-coding
MEIS1_in_B13ko_peak_1426	chr3	187145344	187145344	+	7.92645	NA	Intergenic	THE1D-int|LTR|ERVL-MaLR	-5869	NM_052969	116832	Hs.647900	NM_052969	ENSG00000163923	RPL39L	L39-2|RPL39L1	ribosomal protein L39 like	protein-coding
MEIS1_in_B13ko_peak_451	chr12	3405990	3405990	+	7.91587	NA	intron (NM_001256536, intron 1 of 9)	THE1C-int|LTR|ERVL-MaLR	24641	NM_001256536	56341	Hs.504530	NM_019854	ENSG00000111218	PRMT8	HRMT1L3|HRMT1L4	protein arginine methyltransferase 8	protein-coding
MEIS1_in_B13ko_peak_1758	chr7	44490743	44490743	+	7.91587	NA	promoter-TSS (NM_015332)	promoter-TSS (NM_015332)	43	NM_015332	23386	Hs.488171	NM_015332	ENSG00000015676	NUDCD3	NudCL	NudC domain containing 3	protein-coding
MEIS1_in_B13ko_peak_1587	chr5	173616781	173616781	+	7.91587	NA	promoter-TSS (NM_001159651)	promoter-TSS (NM_001159651)	-118	NM_001159651	91272	Hs.425091	NM_138369	ENSG00000145919	BOD1	FAM44B	biorientation of chromosomes in cell division 1	protein-coding
MEIS1_in_B13ko_peak_475	chr12	22544670	22544670	+	7.91587	NA	promoter-TSS (NM_001286173)	promoter-TSS (NM_001286173)	-124	NM_001286174	9847	Hs.271014	NM_014802	ENSG00000111731	C2CD5	CDP138|KIAA0528	C2 calcium dependent domain containing 5	protein-coding
MEIS1_in_B13ko_peak_1951	chr9	39464590	39464590	+	7.91587	NA	promoter-TSS (NR_003528)	promoter-TSS (NR_003528)	-64	NR_003528	401509	Hs.449445	NM_001032297		ZNF658B	-	zinc finger protein 658B (pseudogene)	pseudo
MEIS1_in_B13ko_peak_1658	chr6	27791346	27791346	+	7.91587	NA	Intergenic	Intergenic	16585	NM_003519	8340	Hs.137594	NM_003519	ENSG00000185130	HIST1H2BL	H2B/c|H2BFC|dJ97D16.4	histone cluster 1 H2B family member l	protein-coding
MEIS1_in_B13ko_peak_948	chr18	63155417	63155417	+	7.88478	NA	intron (NM_000633, intron 2 of 2)	intron (NM_000633, intron 2 of 2)	163963	NM_000657	596	Hs.150749	NM_000633	ENSG00000171791	BCL2	Bcl-2|PPP1R50	BCL2, apoptosis regulator	protein-coding
MEIS1_in_B13ko_peak_1520	chr5	3323836	3323836	+	7.88478	NA	Intergenic	(GT)n|Simple_repeat|Simple_repeat	146001	NR_104617	102467074	Hs.575250	NR_104617	ENSG00000249808	LINC01377	-	long intergenic non-protein coding RNA 1377	ncRNA
MEIS1_in_B13ko_peak_817	chr16	88882533	88882533	+	7.88478	NA	promoter-TSS (NR_135194)	promoter-TSS (NR_135194)	-982	NR_135194	101927793	Hs.690953	NR_135194	ENSG00000259881	LOC101927793	-	uncharacterized LOC101927793	ncRNA
MEIS1_in_B13ko_peak_687	chr14	67493547	67493547	+	7.88478	NA	intron (NM_182526, intron 1 of 2)	LTR10G|LTR|ERV1	21757	NM_182526	161145	Hs.509707	NM_182526	ENSG00000198133	TMEM229B	C14orf83	transmembrane protein 229B	protein-coding
MEIS1_in_B13ko_peak_794	chr16	30053019	30053019	+	7.88478	NA	promoter-TSS (NM_000034)	promoter-TSS (NM_000034)	-71	NM_000034	226	Hs.513490	NM_000034	ENSG00000149925	ALDOA	ALDA|GSD12|HEL-S-87p	aldolase, fructose-bisphosphate A	protein-coding
MEIS1_in_B13ko_peak_125	chr1	149162820	149162820	+	7.88478	NA	Intergenic	U1|snRNA|snRNA	-80509	NM_001277444	400818	Hs.445080	NM_001037675	ENSG00000269713	NBPF9	AE01	NBPF member 9	protein-coding
MEIS1_in_B13ko_peak_777	chr16	3408811	3408811	+	7.88478	NA	exon (NM_003450, exon 3 of 3)	exon (NM_003450, exon 3 of 3)	7621	NM_001347868	7727	Hs.155204	NM_003450	ENSG00000103343	ZNF174	ZSCAN8	zinc finger protein 174	protein-coding
MEIS1_in_B13ko_peak_1475	chr4	52751808	52751808	+	7.88478	NA	promoter-TSS (NM_001242690)	promoter-TSS (NM_001242690)	-168	NM_001242690	100288413	Hs.363087	NM_024534	ENSG00000226887	ERVMER34-1	HEMO|envMER34	endogenous retrovirus group MER34 member 1, envelope	protein-coding
MEIS1_in_B13ko_peak_967	chr19	1021650	1021650	+	7.88478	NA	promoter-TSS (NM_001033026)	promoter-TSS (NM_001033026)	128	NR_004394	26827		NR_004394	ENSG00000206625	RNU6-1	RNU6|RNU6A|U6|U6-1	RNA, U6 small nuclear 1	snRNA
MEIS1_in_B13ko_peak_1562	chr5	111092248	111092248	+	7.88478	NA	promoter-TSS (NM_139281)	promoter-TSS (NM_139281)	76	NM_139281	134430	Hs.533237	NM_139281	ENSG00000134987	WDR36	GLC1G|TA-WDRP|TAWDRP|UTP21	WD repeat domain 36	protein-coding
MEIS1_in_B13ko_peak_1264	chr22	37844664	37844664	+	7.88478	NA	promoter-TSS (NM_138797)	promoter-TSS (NM_138797)	-293	NR_030395	724028		NR_030395	ENSG00000284197	MIR658	MIRN658|hsa-mir-658	microRNA 658	ncRNA
MEIS1_in_B13ko_peak_1270	chr22	43096623	43096623	+	7.88478	NA	Intergenic	LTR10C|LTR|ERV1	-7195	NM_012263	25809	Hs.660298	NM_012263	ENSG00000100271	TTLL1	C22orf7|HS323M22B	tubulin tyrosine ligase like 1	protein-coding
MEIS1_in_B13ko_peak_1453	chr4	4974956	4974956	+	7.88478	NA	intron (NR_125893, intron 2 of 2)	MSTA-int|LTR|ERVL-MaLR	44514	NM_018659	54360	Hs.13872	NM_018659	ENSG00000170891	CYTL1	C17|C4orf4	cytokine like 1	protein-coding
MEIS1_in_B13ko_peak_1105	chr2	75200792	75200792	+	7.88478	NA	Intergenic	CpG	-1273	NM_015727	6869	Hs.633301	NM_001058	ENSG00000115353	TACR1	NK1R|NKIR|SPR|TAC1R	tachykinin receptor 1	protein-coding
MEIS1_in_B13ko_peak_616	chr13	26222354	26222354	+	7.88478	NA	promoter-TSS (NM_005977)	promoter-TSS (NM_005977)	17	NM_183045	6049	Hs.136885	NM_005977	ENSG00000127870	RNF6	-	ring finger protein 6	protein-coding
MEIS1_in_B13ko_peak_1551	chr5	73216243	73216243	+	7.88478	NA	Intergenic	CpG	-14282	NR_134291	340090	Hs.434311	NR_134291		LOC340090	-	uncharacterized LOC340090	ncRNA
MEIS1_in_B13ko_peak_829	chr17	8119789	8119789	+	7.88478	NA	promoter-TSS (NM_001165960)	promoter-TSS (NM_001165960)	-873	NM_001165960	59344	Hs.232770	NM_021628	ENSG00000179148	ALOXE3	ARCI3|E-LOX|eLOX-3|eLOX3	arachidonate lipoxygenase 3	protein-coding
MEIS1_in_B13ko_peak_1033	chr19	46347537	46347537	+	7.88478	NA	intron (NM_001204284, intron 1 of 11)	intron (NM_001204284, intron 1 of 11)	543	NM_006247	5536	Hs.654604	NM_006247	ENSG00000011485	PPP5C	PP5|PPP5|PPT	protein phosphatase 5 catalytic subunit	protein-coding
MEIS1_in_B13ko_peak_13	chr1	10430351	10430351	+	7.88478	NA	promoter-TSS (NR_036462)	promoter-TSS (NR_036462)	249	NM_001270517	100526739	Hs.412311	NM_198544	ENSG00000251503	CENPS-CORT	APITD1-CORT	CENPS-CORT readthrough	protein-coding
MEIS1_in_B13ko_peak_1867	chr7	151028744	151028744	+	7.88478	NA	intron (NM_001282293, intron 1 of 14)	CpG	322	NM_001282292	11194	Hs.647118	NM_007188	ENSG00000197150	ABCB8	EST328128|M-ABC1|MABC1	ATP binding cassette subfamily B member 8	protein-coding
MEIS1_in_B13ko_peak_542	chr12	88580400	88580400	+	7.88478	NA	promoter-TSS (NM_000899)	promoter-TSS (NM_000899)	73	NM_003994	4254	Hs.1048	NM_000899	ENSG00000049130	KITLG	DCUA|DFNA69|FPH2|FPHH|KL-1|Kitl|MGF|SCF|SF|SHEP7|SLF	KIT ligand	protein-coding
MEIS1_in_B13ko_peak_352	chr10	96090223	96090223	+	7.88478	NA	promoter-TSS (NR_038444)	promoter-TSS (NR_038444)	12	NR_134321	728558	Hs.538374	NR_038444	ENSG00000226688	ENTPD1-AS1	-	ENTPD1 antisense RNA 1	ncRNA
MEIS1_in_B13ko_peak_751	chr15	85192495	85192495	+	7.88478	NA	Intergenic	MamGypLTR3|LTR|Gypsy	12792	NR_049748	642423	Hs.681665	NR_049748		LOC642423	-	golgin A2 pseudogene	pseudo
MEIS1_in_B13ko_peak_1268	chr22	42615333	42615333	+	7.88478	NA	promoter-TSS (NM_001278657)	promoter-TSS (NM_001278657)	88	NR_029422	267010	Hs.574857	NR_029422	ENSG00000276027	RNU12	RNU12-1|RNU12L|RNU12P|dJ222E13.7	RNA, U12 small nuclear	snRNA
MEIS1_in_B13ko_peak_961	chr18	77252881	77252881	+	7.88478	NA	intron (NM_001480, intron 1 of 2)	(CAC)n|Simple_repeat|Simple_repeat	2829	NM_001480	2587	Hs.272191	NM_001480	ENSG00000166573	GALR1	GALNR|GALNR1	galanin receptor 1	protein-coding
MEIS1_in_B13ko_peak_853	chr17	21771209	21771209	+	7.88478	NA	Intergenic	CpG	78686	NM_001194958	100134444	Hs.200629	NM_001194958	ENSG00000260458	KCNJ18	KIR2.6|TTPP2	potassium voltage-gated channel subfamily J member 18	protein-coding
MEIS1_in_B13ko_peak_1572	chr5	126875520	126875520	+	7.88478	NA	intron (NM_178450, intron 4 of 4)	intron (NM_178450, intron 4 of 4)	98367	NM_001198557	4001	Hs.89497	NM_005573	ENSG00000113368	LMNB1	ADLD|LMN|LMN2|LMNB	lamin B1	protein-coding
MEIS1_in_B13ko_peak_995	chr19	11949843	11949843	+	7.88478	NA	exon (NM_001271848, exon 4 of 4)	exon (NM_001271848, exon 4 of 4)	-15211	NM_001012753	284390	Hs.646386	NM_001012753	ENSG00000197054	ZNF763	ZNF|ZNF440L	zinc finger protein 763	protein-coding
MEIS1_in_B13ko_peak_937	chr18	31207027	31207027	+	7.88478	NA	Intergenic	Intergenic	-44171	NM_004948	1823	Hs.567260	NM_004948	ENSG00000134765	DSC1	CDHF1|DG2/DG3	desmocollin 1	protein-coding
MEIS1_in_B13ko_peak_53	chr1	44986656	44986656	+	7.88478	NA	promoter-TSS (NM_001261418)	promoter-TSS (NM_001261418)	66	NM_001166588	8891	Hs.533549	NM_020365	ENSG00000070785	EIF2B3	EIF-2B|EIF2Bgamma	eukaryotic translation initiation factor 2B subunit gamma	protein-coding
MEIS1_in_B13ko_peak_1366	chr3	128124051	128124051	+	7.88478	NA	promoter-TSS (NM_001319084)	promoter-TSS (NM_001319084)	-164	NM_001319084	8607	Hs.272822	NM_003707	ENSG00000175792	RUVBL1	ECP-54|ECP54|INO80H|NMP 238|NMP238|PONTIN|Pontin52|RVB1|TIH1|TIP49|TIP49A	RuvB like AAA ATPase 1	protein-coding
MEIS1_in_B13ko_peak_1886	chr8	22604595	22604595	+	7.88478	NA	promoter-TSS (NR_033902)	promoter-TSS (NR_033902)	-37	NR_033902	57805	Hs.744848	NM_021174	ENSG00000158941	CCAR2	DBC-1|DBC1|KIAA1967|NET35|p30 DBC|p30DBC	cell cycle and apoptosis regulator 2	protein-coding
MEIS1_in_B13ko_peak_775	chr16	3317552	3317552	+	7.88478	NA	exon (NM_001302109, exon 7 of 7)	exon (NM_001302109, exon 7 of 7)	9239	NR_126069
MEIS1_in_B13ko_peak_691	chr14	70359795	70359795	+	7.88478	NA	promoter-TSS (NM_001204090)	promoter-TSS (NM_001204090)	-64	NM_001204090	51241	Hs.709581	NM_016468	ENSG00000133983	COX16	C14orf112|HSPC203|hCOX16	COX16, cytochrome c oxidase assembly homolog	protein-coding
MEIS1_in_B13ko_peak_633	chr13	66685469	66685469	+	7.88478	NA	intron (NM_020403, intron 2 of 3)	THE1C-int|LTR|ERVL-MaLR	-139700	NR_046527	100874064	Hs.569284	NR_046527	ENSG00000228842	PCDH9-AS2	-	PCDH9 antisense RNA 2	ncRNA
MEIS1_in_B13ko_peak_944	chr18	49561900	49561900	+	7.88478	NA	promoter-TSS (NM_001308006)	promoter-TSS (NM_001308006)	-131	NM_006033	9388	Hs.465102	NM_006033	ENSG00000101670	LIPG	EDL|EL|PRO719	lipase G, endothelial type	protein-coding
MEIS1_in_B13ko_peak_1096	chr2	63301691	63301691	+	7.88478	NA	intron (NM_015910, intron 13 of 17)	HUERS-P3b-int|LTR|ERV1	136316	NR_122106	51057	Hs.414952	NM_015910	ENSG00000143951	WDPCP	BBS15|C2orf86|CHDTHP|CPLANE5|FRITZ|FRTZ	WD repeat containing planar cell polarity effector	protein-coding
MEIS1_in_B13ko_peak_1003	chr19	14718716	14718716	+	7.88478	NA	exon (NM_032433, exon 12 of 12)	exon (NM_032433, exon 12 of 12)	28658	NM_032433	84449	Hs.515215	NM_032433	ENSG00000160961	ZNF333	-	zinc finger protein 333	protein-coding
MEIS1_in_B13ko_peak_1463	chr4	39366401	39366401	+	7.88478	NA	promoter-TSS (NM_002913)	promoter-TSS (NM_002913)	-20	NM_001204747	5981	Hs.507475	NM_002913	ENSG00000035928	RFC1	A1|MHCBFB|PO-GA|RECC1|RFC|RFC140	replication factor C subunit 1	protein-coding
MEIS1_in_B13ko_peak_1711	chr6	168075909	168075909	+	7.88478	NA	promoter-TSS (NM_001122841)	promoter-TSS (NM_001122841)	-43	NM_001122841	79981	Hs.266746	NM_024919	ENSG00000153303	FRMD1	bA164L23.1	FERM domain containing 1	protein-coding
MEIS1_in_B13ko_peak_1616	chr6	9862796	9862796	+	7.88478	NA	Intergenic	MSTA-int|LTR|ERVL-MaLR	-549522	NR_033910	100130275	Hs.661431	NR_033910		TFAP2A-AS1	-	TFAP2A antisense RNA 1	ncRNA
MEIS1_in_B13ko_peak_1043	chr19	49746626	49746626	+	7.88478	NA	exon (NM_021733, exon 6 of 11)	exon (NM_021733, exon 6 of 11)	16632	NM_021733	60385	Hs.515858	NM_021733	ENSG00000126467	TSKS	PPP1R161|STK22S1|TSKS1|TSSKS	testis specific serine kinase substrate	protein-coding
MEIS1_in_B13ko_peak_1498	chr4	124961301	124961301	+	7.88478	NA	Intergenic	THE1D-int|LTR|ERVL-MaLR	-248569	NM_020337	57182	Hs.480694	NM_020337	ENSG00000151458	ANKRD50	-	ankyrin repeat domain 50	protein-coding
MEIS1_in_B13ko_peak_73	chr1	97056852	97056852	+	7.88478	NA	Intergenic	THE1C-int|LTR|ERVL-MaLR	-39071	NR_046590	100873932	Hs.682651	NR_046590	ENSG00000232878	DPYD-AS1	-	DPYD antisense RNA 1	ncRNA
MEIS1_in_B13ko_peak_1988	chr9	133030951	133030951	+	7.88478	NA	promoter-TSS (NR_135119)	promoter-TSS (NR_135119)	276	NM_001286709	9328	Hs.495417	NM_012087	ENSG00000148308	GTF3C5	TFIIIC63|TFIIICepsilon|TFiiiC2-63	general transcription factor IIIC subunit 5	protein-coding
MEIS1_in_B13ko_peak_403	chr11	63791978	63791978	+	7.88478	NA	Intergenic	LTR10E|LTR|ERV1	-21396	NM_138471	144097	Hs.502793	NM_138471	ENSG00000168005	SPINDOC	C11orf84|SPIN-DOC	spindlin interactor and repressor of chromatin binding	protein-coding
MEIS1_in_B13ko_peak_1491	chr4	102877694	102877694	+	7.88478	NA	intron (NM_001008388, intron 1 of 2)	THE1D-int|LTR|ERVL-MaLR	8716	NM_001008388	493856	Hs.444955	NM_001008388	ENSG00000145354	CISD2	ERIS|Miner1|NAF-1|WFS2|ZCD2	CDGSH iron sulfur domain 2	protein-coding
MEIS1_in_B13ko_peak_638	chr13	79481095	79481095	+	7.88478	NA	promoter-TSS (NM_001161407)	promoter-TSS (NM_001161407)	-29	NM_019080	54602	Hs.525093	NM_019080	ENSG00000102471	NDFIP2	N4WBP5A	Nedd4 family interacting protein 2	protein-coding
MEIS1_in_B13ko_peak_72	chr1	94783764	94783764	+	7.88478	NA	intron (NR_104131, intron 1 of 4)	intron (NR_104131, intron 1 of 4)	36517	NR_104131	101928079	Hs.596857	NR_104131	ENSG00000224081	SLC44A3-AS1	LINC01057|XLOC_000303	SLC44A3 antisense RNA 1	ncRNA
MEIS1_in_B13ko_peak_683	chr14	59483980	59483980	+	7.88478	NA	promoter-TSS (NM_001098625)	promoter-TSS (NM_001098625)	375	NR_138575	112849	Hs.729061	NM_144581	ENSG00000126790	L3HYPDH	C14orf149	trans-L-3-hydroxyproline dehydratase	protein-coding
MEIS1_in_B13ko_peak_453	chr12	6663271	6663271	+	7.88478	NA	promoter-TSS (NM_001127582)	promoter-TSS (NM_001127582)	-129	NM_001127583	51147	Hs.524210	NM_016162	ENSG00000111653	ING4	my036|p29ING4	inhibitor of growth family member 4	protein-coding
MEIS1_in_B13ko_peak_1897	chr8	50329383	50329383	+	7.88478	NA	intron (NM_001321778, intron 2 of 16)	THE1D-int|LTR|ERVL-MaLR	165252	NM_001321778	54212	Hs.584914	NM_018967	ENSG00000147481	SNTG1	G1SYN|SYN4	syntrophin gamma 1	protein-coding
MEIS1_in_B13ko_peak_627	chr13	47959627	47959627	+	7.88478	NA	intron (NM_003850, intron 6 of 10)	LOR1-int|LTR|ERV1	-27005	NR_047492	100861549	Hs.660978	NR_047492	ENSG00000260388	LINC00562	-	long intergenic non-protein coding RNA 562	ncRNA
MEIS1_in_B13ko_peak_478	chr12	27244220	27244220	+	7.86969	NA	promoter-TSS (NM_015000)	promoter-TSS (NM_015000)	75	NM_015000	23012	Hs.184523	NM_015000	ENSG00000211455	STK38L	NDR2	serine/threonine kinase 38 like	protein-coding
MEIS1_in_B13ko_peak_1909	chr8	75407239	75407239	+	7.84876	NA	promoter-TSS (NM_001330561)	promoter-TSS (NM_001330561)	-431	NM_001330561	3174	Hs.241529	NM_004133	ENSG00000164749	HNF4G	NR2A2|NR2A3	hepatocyte nuclear factor 4 gamma	protein-coding
MEIS1_in_B13ko_peak_520	chr12	56909601	56909601	+	7.84187	NA	Intergenic	THE1C-int|LTR|ERVL-MaLR	24804	NM_148897	121214	Hs.380178	NM_148897	ENSG00000170426	SDR9C7	ARCI13|RDHS|SDR-O|SDRO	short chain dehydrogenase/reductase family 9C member 7	protein-coding
MEIS1_in_B13ko_peak_1240	chr21	46699925	46699925	+	7.83058	NA	Intergenic	(AGGGTT)n|Simple_repeat|Simple_repeat	64330	NM_001535	3275	Hs.154163	NM_001535	ENSG00000160310	PRMT2	HRMT1L1	protein arginine methyltransferase 2	protein-coding
MEIS1_in_B13ko_peak_28	chr1	21332370	21332370	+	7.8206	NA	intron (NM_001113348, intron 1 of 18)	MIR|SINE|MIR	13171	NM_001113348	1889	Hs.195080	NM_001397	ENSG00000117298	ECE1	ECE	endothelin converting enzyme 1	protein-coding
MEIS1_in_B13ko_peak_301	chr1	239943950	239943950	+	7.82058	NA	Intergenic	THE1D-int|LTR|ERVL-MaLR	-44078	NR_046582	100873984	Hs.199475	NR_046582	ENSG00000234601	CHRM3-AS1	-	CHRM3 antisense RNA 1	ncRNA
MEIS1_in_B13ko_peak_275	chr1	225777696	225777696	+	7.80837	NA	promoter-TSS (NM_001130440)	promoter-TSS (NM_001130440)	-117	NM_001130440	6726	Hs.511425	NM_003133	ENSG00000143742	SRP9	ALURBP	signal recognition particle 9	protein-coding
MEIS1_in_B13ko_peak_139	chr1	149885778	149885778	+	7.80297	NA	3' UTR (NM_003528, exon 1 of 1)	3' UTR (NM_003528, exon 1 of 1)	904	NM_003528	8349	Hs.2178	NM_003528	ENSG00000184678	HIST2H2BE	GL105|H2B|H2B.1|H2BFQ|H2BGL105|H2BQ	histone cluster 2 H2B family member e	protein-coding
MEIS1_in_B13ko_peak_492	chr12	47905009	47905009	+	7.79251	NA	promoter-TSS (NM_000376)	promoter-TSS (NM_000376)	22	NM_001017535	7421	Hs.524368	NM_000376	ENSG00000111424	VDR	NR1I1|PPP1R163	vitamin D receptor	protein-coding
MEIS1_in_B13ko_peak_71	chr1	93847563	93847563	+	7.76973	NA	promoter-TSS (NM_001261408)	promoter-TSS (NM_001261408)	-413	NM_001261408	8412	Hs.36958	NM_003567	ENSG00000137936	BCAR3	AND-34|NSP2|SH2D3B	BCAR3, NSP family adaptor protein	protein-coding
MEIS1_in_B13ko_peak_1197	chr21	8416202	8416202	+	7.76812	NA	Intergenic	(TCTC)n|Simple_repeat|Simple_repeat	-16328	NR_128716	103504739		NR_128716	ENSG00000277379	MIR6724-3	hsa-mir-6724-3	microRNA 6724-3	ncRNA
MEIS1_in_B13ko_peak_1210	chr21	8462877	8462877	+	7.7426	NA	Intergenic	Intergenic	21731	NR_003287	100008589		NR_003287		RNA28SN5	RN28S1|RNA28S5	RNA, 28S ribosomal N5	rRNA
MEIS1_in_B13ko_peak_1812	chr7	100022912	100022912	+	7.74163	NA	intron (NM_001346581, intron 2 of 6)	intron (NM_001346581, intron 2 of 6)	7360	NM_001287054	7586	Hs.615360	NM_003439	ENSG00000106261	ZKSCAN1	KOX18|PHZ-37|ZNF139|ZNF36|ZSCAN33	zinc finger with KRAB and SCAN domains 1	protein-coding
MEIS1_in_B13ko_peak_1495	chr4	114549825	114549825	+	7.69024	NA	Intergenic	MER4-int|LTR|ERV1	-48577	NM_001322112	7368	Hs.144197	NM_003360	ENSG00000174607	UGT8	CGT|UGT4	UDP glycosyltransferase 8	protein-coding
MEIS1_in_B13ko_peak_474	chr12	22023695	22023695	+	7.6868	NA	Intergenic	THE1B-int|LTR|ERVL-MaLR	-22479	NM_018686	55907	Hs.311346	NM_018686	ENSG00000111726	CMAS	CSS	cytidine monophosphate N-acetylneuraminic acid synthetase	protein-coding
MEIS1_in_B13ko_peak_369	chr11	694787	694787	+	7.66873	NA	promoter-TSS (NM_001042463)	promoter-TSS (NM_001042463)	-804	NM_174940	283232	Hs.448664	NM_174940	ENSG00000177042	TMEM80	-	transmembrane protein 80	protein-coding
MEIS1_in_B13ko_peak_1983	chr9	127771471	127771471	+	7.63968	NA	promoter-TSS (NM_001252334)	promoter-TSS (NM_001252334)	-102	NM_005489	10044	Hs.306412	NM_005489	ENSG00000095370	SH2D3C	CHAT|NSP3|PRO34088|SHEP1	SH2 domain containing 3C	protein-coding
MEIS1_in_B13ko_peak_956	chr18	70443123	70443123	+	7.63968	NA	Intergenic	LTR10B2|LTR|ERV1	-58532	NR_110764	101060542	Hs.586967	NR_110764	ENSG00000266278	LINC01910	-	long intergenic non-protein coding RNA 1910	ncRNA
MEIS1_in_B13ko_peak_1536	chr5	48070460	48070460	+	7.63968	NA	Intergenic	ALR/Alpha|Satellite|centr	2370940	NM_198449	133418	Hs.561411	NM_198449	ENSG00000170571	EMB	GP70	embigin	protein-coding
MEIS1_in_B13ko_peak_21	chr1	16545965	16545965	+	7.63968	NA	Intergenic	tRNA-Gly-GGG|tRNA|tRNA	-2949	NR_037446	100500876		NR_037446	ENSG00000263811	MIR3675	-	microRNA 3675	ncRNA
MEIS1_in_B13ko_peak_507	chr12	53727602	53727602	+	7.63968	NA	promoter-TSS (NM_020898)	promoter-TSS (NM_020898)	-79	NM_001143682	57658	Hs.156667	NM_020898	ENSG00000012822	CALCOCO1	Cocoa|PP13275|calphoglin	calcium binding and coiled-coil domain 1	protein-coding
MEIS1_in_B13ko_peak_571	chr12	113135738	113135738	+	7.63968	NA	promoter-TSS (NM_001193521)	promoter-TSS (NM_001193521)	16	NM_001193521	8437	Hs.528693	NM_004658	ENSG00000111344	RASAL1	RASAL	RAS protein activator like 1	protein-coding
MEIS1_in_B13ko_peak_1413	chr3	176513797	176513797	+	7.63968	NA	Intergenic	HUERS-P3-int|LTR|ERV1	-1306	NR_107017	102465858		NR_107017	ENSG00000283333	MIR7977	hsa-mir-7977	microRNA 7977	ncRNA
MEIS1_in_B13ko_peak_718	chr15	40593870	40593870	+	7.63968	NA	promoter-TSS (NM_170589)	promoter-TSS (NM_170589)	-379	NM_144508	57082	Hs.181855	NM_144508	ENSG00000137812	KNL1	AF15Q14|CASC5|CT29|D40|MCPH4|PPP1R55|Spc7|hKNL-1|hSpc105	kinetochore scaffold 1	protein-coding
MEIS1_in_B13ko_peak_1598	chr5	181046078	181046078	+	7.63968	NA	intron (NM_152547, intron 2 of 10)	intron (NM_152547, intron 2 of 10)	-2594	NR_107056	102465882		NR_107056	ENSG00000277912	MIR8089	hsa-mir-8089	microRNA 8089	ncRNA
MEIS1_in_B13ko_peak_1103	chr2	74958499	74958499	+	7.63968	NA	promoter-TSS (NM_019896)	promoter-TSS (NM_019896)	-149	NM_019896	56655	Hs.469060	NM_019896	ENSG00000115350	POLE4	YHHQ1|p12	DNA polymerase epsilon 4, accessory subunit	protein-coding
MEIS1_in_B13ko_peak_1454	chr4	6058724	6058724	+	7.63968	NA	intron (NM_001306133, intron 11 of 12)	LTR10E|LTR|ERV1	-135396	NR_039608	100616201		NR_039608	ENSG00000263631	MIR378D1	mir-378d-1	microRNA 378d-1	ncRNA
MEIS1_in_B13ko_peak_1930	chr8	143669277	143669277	+	7.63674	NA	Intergenic	LTR10B1|LTR|ERV1	-15175	NM_001288807	286075	Hs.521922	NM_173831	ENSG00000181135	ZNF707	-	zinc finger protein 707	protein-coding
MEIS1_in_B13ko_peak_773	chr16	3189661	3189661	+	7.63674	NA	Intergenic	tRNA-Pro-CCY|tRNA|tRNA	-14586	NM_012360	4992	Hs.664502	NM_012360	ENSG00000168124	OR1F1	OLFMF|OR16-36|OR16-37|OR16-88|OR16-89|OR16-90|OR1F10|OR1F13P|OR1F4|OR1F5|OR1F6|OR1F7|OR1F8|OR1F9|OR3-145|ORL1023	olfactory receptor family 1 subfamily F member 1	protein-coding
MEIS1_in_B13ko_peak_1521	chr5	8470679	8470679	+	7.63674	NA	Intergenic	THE1C-int|LTR|ERVL-MaLR	9754	NR_039663	100616142		NR_039663	ENSG00000284000	MIR4458	mir-4458	microRNA 4458	ncRNA
MEIS1_in_B13ko_peak_1866	chr7	151008857	151008857	+	7.63674	NA	intron (NM_000603, intron 17 of 26)	CpG	15053	NM_001160109	4846	Hs.647092	NM_000603	ENSG00000164867	NOS3	ECNOS|eNOS	nitric oxide synthase 3	protein-coding
MEIS1_in_B13ko_peak_960	chr18	76255275	76255275	+	7.63674	NA	Intergenic	Intergenic	132277	NR_040034	339298	Hs.151215	NR_040034	ENSG00000263547	LOC339298	-	uncharacterized LOC339298	ncRNA
MEIS1_in_B13ko_peak_2	chr1	11229	11229	+	7.63674	NA	promoter-TSS (NR_046018)	promoter-TSS (NR_046018)	-645	NR_046018	100287102	Hs.618434	NR_046018	ENSG00000223972	DDX11L1	-	DEAD/H-box helicase 11 like 1	pseudo
MEIS1_in_B13ko_peak_1531	chr5	42424887	42424887	+	7.63674	NA	promoter-TSS (NM_001242401)	promoter-TSS (NM_001242401)	-105	NM_001242401	2690	Hs.125180	NM_000163	ENSG00000112964	GHR	GHBP|GHIP	growth hormone receptor	protein-coding
MEIS1_in_B13ko_peak_1350	chr3	109410007	109410007	+	7.63674	NA	promoter-TSS (NR_109842)	promoter-TSS (NR_109842)	17	NR_109841	401082	Hs.477089	NM_001145553	ENSG00000228980	LINC01205	-	long intergenic non-protein coding RNA 1205	ncRNA
MEIS1_in_B13ko_peak_1967	chr9	91930528	91930528	+	7.63674	NA	intron (NM_004560, intron 1 of 8)	LTR10B2|LTR|ERV1	19634	NM_001318204	4920	Hs.98255	NM_004560	ENSG00000169071	ROR2	BDB|BDB1|NTRKR2	receptor tyrosine kinase like orphan receptor 2	protein-coding
MEIS1_in_B13ko_peak_501	chr12	52069595	52069595	+	7.63674	NA	promoter-TSS (NM_001098673)	promoter-TSS (NM_001098673)	-379	NM_021934	60673	Hs.9911	NM_021934	ENSG00000123395	ATG101	C12orf44	autophagy related 101	protein-coding
MEIS1_in_B13ko_peak_1253	chr22	19806599	19806599	+	7.63674	NA	intron (NM_053004, intron 6 of 7)	intron (NM_053004, intron 6 of 7)	48249	NM_024627	79680	Hs.105642	NM_024627	ENSG00000215012	RTL10	BOP|C22orf29	retrotransposon Gag like 10	protein-coding
MEIS1_in_B13ko_peak_1060	chr19	58519810	58519810	+	7.63674	NA	promoter-TSS (NM_001316978)	promoter-TSS (NM_001316978)	199	NM_001316979	84878	Hs.515662	NM_032792	ENSG00000119574	ZBTB45	ZNF499	zinc finger and BTB domain containing 45	protein-coding
MEIS1_in_B13ko_peak_1484	chr4	88335196	88335196	+	7.61986	NA	intron (NR_134238, intron 3 of 4)	MSTB1|LTR|ERVL-MaLR	-43543	NM_001165136	55008	Hs.529317	NM_017912	ENSG00000138642	HERC6	-	HECT and RLD domain containing E3 ubiquitin protein ligase family member 6	protein-coding
MEIS1_in_B13ko_peak_1401	chr3	157120558	157120558	+	7.61986	NA	intron (NR_034007, intron 1 of 3)	CpG	2444	NR_034007	339894	Hs.478050	NR_034007	ENSG00000243629	LINC00880	-	long intergenic non-protein coding RNA 880	ncRNA
MEIS1_in_B13ko_peak_712	chr14_KI270723v1_random	21946	21946	+	7.60172	NA	NA	Intergenic	NA	NA
MEIS1_in_B13ko_peak_1749	chr7	36946217	36946217	+	7.60082	NA	intron (NM_001206482, intron 16 of 21)	intron (NM_001206482, intron 16 of 21)	-26785	NR_031604	100302113		NR_031604	ENSG00000221325	MIR1200	MIRN1200|hsa-mir-1200	microRNA 1200	ncRNA
MEIS1_in_B13ko_peak_1187	chr21	8229857	8229857	+	7.57062	NA	intron (NR_003287, intron 1 of 2)	HERVIP10FH-int|LTR|ERV1	15969	NR_003287	100008589		NR_003287		RNA28SN5	RN28S1|RNA28S5	RNA, 28S ribosomal N5	rRNA
MEIS1_in_B13ko_peak_531	chr12	64600348	64600348	+	7.53733	NA	Intergenic	Intergenic	-10165	NM_178169	283349	Hs.643605	NM_178169	ENSG00000153179	RASSF3	RASSF5	Ras association domain family member 3	protein-coding
MEIS1_in_B13ko_peak_1200	chr21	8418943	8418943	+	7.50484	NA	Intergenic	CpG	-13587	NR_128716	103504739		NR_128716	ENSG00000277379	MIR6724-3	hsa-mir-6724-3	microRNA 6724-3	ncRNA
MEIS1_in_B13ko_peak_1710	chr6	167826434	167826434	+	7.49859	NA	promoter-TSS (NM_001040000)	promoter-TSS (NM_001040000)	362	NR_027906	653483	Hs.520556	NM_001042508	ENSG00000198221	AFDN-DT	AFDN-AS1|C6orf124|HGC6.4|MLLT4-AS1|dJ431P23.3	AFDN divergent transcript	ncRNA
MEIS1_in_B13ko_peak_1374	chr3	129908654	129908654	+	7.49859	NA	non-coding (NR_037893, exon 3 of 3)	non-coding (NR_037893, exon 3 of 3)	14783	NR_037893	100507032	Hs.529562	NR_037893	ENSG00000271270	TMCC1-AS1	-	TMCC1 antisense RNA 1 (head to head)	ncRNA
MEIS1_in_B13ko_peak_220	chr1	181482759	181482759	+	7.49859	NA	promoter-TSS (NM_000721)	promoter-TSS (NM_000721)	-791	NM_000721	777	Hs.437444	NM_000721	ENSG00000198216	CACNA1E	BII|CACH6|CACNL1A6|Cav2.3|gm139	calcium voltage-gated channel subunit alpha1 E	protein-coding
MEIS1_in_B13ko_peak_2001	chr9_KI270718v1_random	37872	37872	+	7.49786	NA	NA	(TG)n|Simple_repeat|Simple_repeat	NA	NA
MEIS1_in_B13ko_peak_1993	chr9	134501330	134501330	+	7.47682	NA	Intergenic	CpG	94748	NM_001291921	6256	Hs.590886	NM_002957	ENSG00000186350	RXRA	NR2B1	retinoid X receptor alpha	protein-coding
MEIS1_in_B13ko_peak_162	chr1	154351591	154351591	+	7.45297	NA	TTS (NM_020452)	TTS (NM_020452)	23791	NM_020452	57198	Hs.435700	NM_020452	ENSG00000143515	ATP8B2	ATPID	ATPase phospholipid transporting 8B2	protein-coding
MEIS1_in_B13ko_peak_574	chr12	114656281	114656281	+	7.45297	NA	Intergenic	Intergenic	27883	NM_016569	6926	Hs.744016	NM_005996	ENSG00000135111	TBX3	TBX3-ISO|UMS|XHL	T-box 3	protein-coding
MEIS1_in_B13ko_peak_1337	chr3	86603769	86603769	+	7.45297	NA	Intergenic	THE1C-int|LTR|ERVL-MaLR	121826	NR_135563	101927494	Hs.385622	NR_135563	ENSG00000241328	LINC02070	-	long intergenic non-protein coding RNA 2070	ncRNA
MEIS1_in_B13ko_peak_2023	chrUn_GL000220v1	143161	143161	+	7.43697	NA	Intergenic	AluSp|SINE|Alu	-5543	NR_128717	103504733		NR_128717	ENSG00000275692	MIR6724-4	hsa-mir-6724-4	microRNA 6724-4	ncRNA
MEIS1_in_B13ko_peak_1797	chr7	88546250	88546250	+	7.406	NA	Intergenic	HUERS-P3-int|LTR|ERV1	-213118	NM_181646	219578	Hs.684410	NM_181646	ENSG00000182348	ZNF804B	-	zinc finger protein 804B	protein-coding
MEIS1_in_B13ko_peak_240	chr1	200669956	200669956	+	7.38636	NA	promoter-TSS (NM_001320181)	promoter-TSS (NM_001320181)	42	NM_001320181	83479	Hs.497332	NM_031306	ENSG00000118197	DDX59	OFD5|ZNHIT5	DEAD-box helicase 59	protein-coding
MEIS1_in_B13ko_peak_1944	chr9	32148789	32148789	+	7.31659	NA	Intergenic	LTR13|LTR|ERVK	-235814	NM_002197	48	Hs.567229	NM_002197	ENSG00000122729	ACO1	ACONS|HEL60|IREB1|IREBP|IREBP1|IRP1	aconitase 1	protein-coding
MEIS1_in_B13ko_peak_1242	chr22	11702666	11702666	+	7.31333	NA	Intergenic	ACRO1|Satellite|acro	-194740	NR_110761	102723769	Hs.652926	NR_110761		LOC102723769	-	uncharacterized LOC102723769	ncRNA
MEIS1_in_B13ko_peak_1632	chr6	26521237	26521237	+	7.31095	NA	promoter-TSS (NR_026790)	promoter-TSS (NR_026790)	-469	NR_026790	493812	Hs.272939	NR_026790	ENSG00000228223	HCG11	CTA-14H9.3|bK14H9.3	HLA complex group 11 (non-protein coding)	ncRNA
MEIS1_in_B13ko_peak_224	chr1	183805136	183805136	+	7.30718	NA	promoter-TSS (NM_001297671)	promoter-TSS (NM_001297671)	55	NM_001297671	23179	Hs.497148	NM_015149	ENSG00000143344	RGL1	RGL	ral guanine nucleotide dissociation stimulator like 1	protein-coding
MEIS1_in_B13ko_peak_2045	chrY	56834420	56834420	+	7.2801	NA	Intergenic	Intergenic	-119835	NM_005840	10251	Hs.381912	NM_005840	ENSG00000168939	SPRY3	spry-3	sprouty RTK signaling antagonist 3	protein-coding
MEIS1_in_B13ko_peak_246	chr1	202624921	202624921	+	7.27947	NA	intron (NM_177402, intron 1 of 8)	(GT)n|Simple_repeat|Simple_repeat	18532	NM_001136504	127833	Hs.25422	NM_177402	ENSG00000143858	SYT2	CMS7|MYSPC|SytII	synaptotagmin 2	protein-coding
MEIS1_in_B13ko_peak_1190	chr21	8235811	8235811	+	7.26935	NA	intron (NR_003287, intron 1 of 2)	intron (NR_003287, intron 1 of 2)	-13694	NR_128715	103504727		NR_128715	ENSG00000274060	MIR6724-2	hsa-mir-6724-2	microRNA 6724-2	ncRNA
MEIS1_in_B13ko_peak_584	chr12	121352561	121352561	+	7.26142	NA	promoter-TSS (NM_016237)	promoter-TSS (NM_016237)	-99	NM_001330489	51433	Hs.7101	NM_016237	ENSG00000089053	ANAPC5	APC5	anaphase promoting complex subunit 5	protein-coding
MEIS1_in_B13ko_peak_606	chr12	132986297	132986297	+	7.2282	NA	promoter-TSS (NM_001256279)	promoter-TSS (NM_001256279)	-51	NM_001256280	7574	Hs.489608	NM_019591	ENSG00000198393	ZNF26	HEL-179|KOX20	zinc finger protein 26	protein-coding
MEIS1_in_B13ko_peak_314	chr1	247078853	247078853	+	7.21977	NA	promoter-TSS (NM_001204220)	promoter-TSS (NM_001204220)	-40	NR_037894	100533111	Hs.732305	NR_037894	ENSG00000135747	ZNF670-ZNF695	-	ZNF670-ZNF695 readthrough (NMD candidate)	ncRNA
MEIS1_in_B13ko_peak_2026	chrUn_GL000224v1	16822	16822	+	7.21613	NA	Intergenic	Intergenic	-85681	NR_135481	100505874	Hs.559790	NR_135481		LOC100505874	-	uncharacterized LOC100505874	ncRNA
MEIS1_in_B13ko_peak_407	chr11	65607342	65607342	+	7.17818	NA	exon (NM_002419, exon 5 of 10)	exon (NM_002419, exon 5 of 10)	6907	NM_002419	4296	Hs.502872	NM_002419	ENSG00000173327	MAP3K11	MEKK11|MLK-3|MLK3|PTK1|SPRK	mitogen-activated protein kinase kinase kinase 11	protein-coding
MEIS1_in_B13ko_peak_589	chr12	124914979	124914979	+	7.17818	NA	promoter-TSS (NM_021009)	promoter-TSS (NM_021009)	62	NM_021009	7316	Hs.520348	NM_021009	ENSG00000150991	UBC	HMG20	ubiquitin C	protein-coding
MEIS1_in_B13ko_peak_1760	chr7	44720475	44720475	+	7.17818	NA	Intergenic	MER50-int|LTR|ERV1	-28091	NM_001300959	83637	Hs.77978	NM_031449	ENSG00000122515	ZMIZ2	NET27|TRAFIP20|ZIMP7|hZIMP7	zinc finger MIZ-type containing 2	protein-coding
MEIS1_in_B13ko_peak_8	chr1	3247808	3247808	+	7.12903	NA	intron (NM_199454, intron 3 of 16)	CpG	119833	NR_036215	100422968		NR_036215	ENSG00000283572	MIR4251	-	microRNA 4251	ncRNA
MEIS1_in_B13ko_peak_339	chr10	59176417	59176417	+	7.12903	NA	promoter-TSS (NM_032439)	promoter-TSS (NM_032439)	47	NR_131782	105682749	Hs.592518	NR_131782		CCEPR	CCHE1|lncRNA-CCHE1	cervical carcinoma expressed PCNA regulatory lncRNA	ncRNA
MEIS1_in_B13ko_peak_1255	chr22	21385591	21385591	+	7.12903	NA	exon (NM_001128633, exon 1 of 1)	exon (NM_001128633, exon 1 of 1)	1840	NM_001128635	440804	Hs.568257	NM_001128635	ENSG00000274600	RIMBP3B	RIM-BP3.2|RIM-BP3.B|RIMBP3.2	RIMS binding protein 3B	protein-coding
MEIS1_in_B13ko_peak_1757	chr7	44019186	44019186	+	7.12216	NA	promoter-TSS (NR_003655)	promoter-TSS (NR_003655)	8	NR_003655	84820	Hs.657028	NM_032734	ENSG00000214783	POLR2J4	RPB11-phi	RNA polymerase II subunit J4, pseudogene	pseudo
MEIS1_in_B13ko_peak_1166	chr20	62427638	62427638	+	7.11992	NA	promoter-TSS (NM_080833)	promoter-TSS (NM_080833)	-65	NM_080833	140893	Hs.180374	NM_080833	ENSG00000130701	RBBP8NL	C20orf151	RBBP8 N-terminal like	protein-coding
MEIS1_in_B13ko_peak_1538	chr5	48364137	48364137	+	7.11992	NA	Intergenic	ALR/Alpha|Satellite|centr	2077263	NM_198449	133418	Hs.561411	NM_198449	ENSG00000170571	EMB	GP70	embigin	protein-coding
MEIS1_in_B13ko_peak_364	chr10	132364463	132364463	+	7.11992	NA	intron (NM_001309474, intron 8 of 9)	(CACTCA)n|Simple_repeat|Simple_repeat	27356	NM_001309474	80313	Hs.119897	NM_030626	ENSG00000148814	LRRC27	-	leucine rich repeat containing 27	protein-coding
MEIS1_in_B13ko_peak_85	chr1	123558198	123558198	+	7.11992	NA	Intergenic	ALR/Alpha|Satellite|centr	2039086	NR_003955	647121	Hs.697682	NR_003955	ENSG00000231752	EMBP1	-	embigin pseudogene 1	pseudo
MEIS1_in_B13ko_peak_1972	chr9	102548396	102548396	+	7.11992	NA	intron (NR_103830, intron 1 of 4)	THE1C-int|LTR|ERVL-MaLR	28759	NR_103830	414319	Hs.385790	NR_103830	ENSG00000204250	LINC00587	C9orf107|bA785H23.1	long intergenic non-protein coding RNA 587	ncRNA
MEIS1_in_B13ko_peak_127	chr1	149558400	149558400	+	7.11992	NA	Intergenic	Intergenic	-25423	NM_001135789	653598	Hs.534674	NM_001135789	ENSG00000263464	PPIAL4C	COAS-2	peptidylprolyl isomerase A like 4C	protein-coding
MEIS1_in_B13ko_peak_1824	chr7	103049010	103049010	+	7.10448	NA	intron (NM_001287150, intron 2 of 18)	MER57-int|LTR|ERV1	25558	NM_145032	222235	Hs.660029	NM_145032	ENSG00000161040	FBXL13	DRC6|Fbl13	F-box and leucine rich repeat protein 13	protein-coding
MEIS1_in_B13ko_peak_424	chr11	83286423	83286423	+	7.07814	NA	promoter-TSS (NM_001286116)	promoter-TSS (NM_001286116)	-16	NM_001286116	60492	Hs.368866	NM_021825	ENSG00000137500	CCDC90B	MDS011|MDS025	coiled-coil domain containing 90B	protein-coding
MEIS1_in_B13ko_peak_891	chr17	50719461	50719461	+	7.07814	NA	promoter-TSS (NM_006107)	promoter-TSS (NM_006107)	-83	NM_001330330	51747	Hs.130293	NM_006107	ENSG00000108848	LUC7L3	CRA|CREAP-1|CROP|LUC7A|OA48-18|hLuc7A	LUC7 like 3 pre-mRNA splicing factor	protein-coding
MEIS1_in_B13ko_peak_1729	chr7	8442880	8442880	+	7.07814	NA	intron (NM_152745, intron 2 of 2)	CpG	8925	NM_152745	30010	Hs.487564	NM_152745	ENSG00000122584	NXPH1	NPH1|Nbla00697	neurexophilin 1	protein-coding
MEIS1_in_B13ko_peak_675	chr14	45253370	45253370	+	7.07814	NA	promoter-TSS (NM_018353)	promoter-TSS (NM_018353)	32	NM_018353	55320	Hs.732769	NM_018353	ENSG00000129534	MIS18BP1	C14orf106|HSA242977|KNL2|M18BP1	MIS18 binding protein 1	protein-coding
MEIS1_in_B13ko_peak_959	chr18	74617056	74617056	+	7.07814	NA	Intergenic	Intergenic	-13907	NM_001146190	55628	Hs.536490	NM_017757	ENSG00000215421	ZNF407	-	zinc finger protein 407	protein-coding
MEIS1_in_B13ko_peak_389	chr11	47578998	47578998	+	7.07814	NA	promoter-TSS (NM_001318716)	promoter-TSS (NM_001318716)	-12	NM_004551	4722	Hs.502528	NM_004551	ENSG00000213619	NDUFS3	CI-30	NADH:ubiquinone oxidoreductase core subunit S3	protein-coding
MEIS1_in_B13ko_peak_18	chr1	12191564	12191564	+	7.07814	NA	promoter-TSS (NR_039775)	promoter-TSS (NR_039775)	-149	NR_039775	100616438		NR_039775	ENSG00000263676	MIR4632	-	microRNA 4632	ncRNA
MEIS1_in_B13ko_peak_1695	chr6	133837983	133837983	+	7.07814	NA	intron (NR_027030, intron 2 of 2)	intron (NR_027030, intron 2 of 2)	16836	NR_027030	154089	Hs.126165	NR_027030		LINC01312	-	long intergenic non-protein coding RNA 1312	ncRNA
MEIS1_in_B13ko_peak_1124	chr2	180258096	180258096	+	7.07814	NA	Intergenic	Intergenic	-251043	NM_020943	57703	Hs.311363	NM_020943	ENSG00000163510	CWC22	EIF4GL|NCM|fSAPb	CWC22 spliceosome associated protein homolog	protein-coding
MEIS1_in_B13ko_peak_55	chr1	52698037	52698037	+	7.07814	NA	intron (NM_023077, intron 1 of 2)	CpG	329	NM_023077	65260	Hs.349905	NM_023077	ENSG00000162377	COA7	C1orf163|RESA1|SELRC1	cytochrome c oxidase assembly factor 7 (putative)	protein-coding
MEIS1_in_B13ko_peak_1278	chr22	49973769	49973769	+	7.07814	NA	Intergenic	(GT)n|Simple_repeat|Simple_repeat	10903	NR_106879	102465493		NR_106879	ENSG00000276753	MIR6821	hsa-mir-6821	microRNA 6821	ncRNA
MEIS1_in_B13ko_peak_1162	chr20	50790858	50790858	+	7.07814	NA	Intergenic	Intergenic	-4036	NM_001010974	55653	Hs.381178	NM_017843	ENSG00000124243	BCAS4	CNOL	breast carcinoma amplified sequence 4	protein-coding
MEIS1_in_B13ko_peak_43	chr1	31431999	31431999	+	7.07814	NA	intron (NM_001199039, intron 9 of 10)	(GATAGGGTG)n|Simple_repeat|Simple_repeat	18186	NM_001199039	347735	Hs.270655	NM_018565	ENSG00000168528	SERINC2	FKSG84|PRO0899|TDE2|TDE2L	serine incorporator 2	protein-coding
MEIS1_in_B13ko_peak_585	chr12	121687175	121687175	+	7.07814	NA	Intergenic	CpG	-17521	NM_173855	283385	Hs.434154	NM_173855	ENSG00000139714	MORN3	-	MORN repeat containing 3	protein-coding
MEIS1_in_B13ko_peak_1159	chr20	40468851	40468851	+	7.07814	NA	Intergenic	MSTB1|LTR|ERVL-MaLR	220389	NM_005461	9935	Hs.169487	NM_005461	ENSG00000204103	MAFB	DURS3|KRML|MCTO	MAF bZIP transcription factor B	protein-coding
MEIS1_in_B13ko_peak_1441	chr3_KI270778v1_alt	236007	236007	+	7.07814	NA	NA	THE1C-int|LTR|ERVL-MaLR	NA	NA
MEIS1_in_B13ko_peak_1925	chr8	129603820	129603820	+	7.07814	NA	intron (NR_130917, intron 1 of 3)	THE1C-int|LTR|ERVL-MaLR	-28802	NR_130919	137196	Hs.679457	NR_130917	ENSG00000229140	CCDC26	RAM	CCDC26 long non-coding RNA	ncRNA
MEIS1_in_B13ko_peak_842	chr17	8227036	8227036	+	7.07814	NA	non-coding (NR_046431, exon 22 of 22)	non-coding (NR_046431, exon 22 of 22)	-2993	NR_026951	284029	Hs.121692	NM_173621	ENSG00000178977	LINC00324	C17orf44|NCRNA00324	long intergenic non-protein coding RNA 324	ncRNA
MEIS1_in_B13ko_peak_402	chr11	63681335	63681335	+	7.07814	NA	promoter-TSS (NM_006054)	promoter-TSS (NM_006054)	-115	NM_201428	10313	Hs.743229	NM_006054	ENSG00000133318	RTN3	ASYIP|HAP|NSPL2|NSPLII|RTN3-A1	reticulon 3	protein-coding
MEIS1_in_B13ko_peak_1078	chr2	10012786	10012786	+	7.07814	NA	Intergenic	CpG	30615	NR_135558	101929882	Hs.405158	NR_135558		LOC101929882	-	uncharacterized LOC101929882	ncRNA
MEIS1_in_B13ko_peak_1631	chr6	26418259	26418259	+	7.07814	NA	Intergenic	THE1C-int|LTR|ERVL-MaLR	-3132	NR_027795	54718	Hs.729655	NM_024018	ENSG00000124549	BTN2A3P	BTN2.3|BTN2A3	butyrophilin subfamily 2 member A3, pseudogene	pseudo
MEIS1_in_B13ko_peak_333	chr10	42782676	42782676	+	7.07814	NA	5' UTR (NM_014753, exon 1 of 23)	5' UTR (NM_014753, exon 1 of 23)	170	NM_014753	9790	Hs.10848	NM_014753	ENSG00000165733	BMS1	ACC|BMS1L	BMS1, ribosome biogenesis factor	protein-coding
MEIS1_in_B13ko_peak_374	chr11	14154292	14154292	+	7.07814	NA	intron (NM_006108, intron 6 of 15)	MSTA-int|LTR|ERVL-MaLR	191655	NM_006108	10418	Hs.643864	NM_006108	ENSG00000262655	SPON1	VSGP/F-spondin|f-spondin	spondin 1	protein-coding
MEIS1_in_B13ko_peak_1301	chr2_KI270893v1_alt	51445	51445	+	7.07814	NA	intron (NR_110220, intron 1 of 1).3	CpG	42067	NR_110592	102723927	Hs.733585	NR_110592	ENSG00000237940	LINC01238	-	long intergenic non-protein coding RNA 1238	ncRNA
MEIS1_in_B13ko_peak_939	chr18	33863847	33863847	+	7.07814	NA	intron (NM_001282527, intron 10 of 10)	THE1D-int|LTR|ERVL-MaLR	184765	NM_001198549	8715	Hs.514795	NM_003787	ENSG00000101746	NOL4	CT125|HRIHFB2255|NOLP	nucleolar protein 4	protein-coding
MEIS1_in_B13ko_peak_920	chr17	82494630	82494630	+	7.07814	NA	Intergenic	Intergenic	-25088	NM_004514	3607	Hs.591140	NM_004514	ENSG00000141568	FOXK2	ILF|ILF-1|ILF1	forkhead box K2	protein-coding
MEIS1_in_B13ko_peak_997	chr19	12527623	12527623	+	7.07814	NA	exon (NM_144976, exon 4 of 4)	exon (NM_144976, exon 4 of 4)	23919	NM_144976	163050	Hs.655615	NM_144976	ENSG00000249709	ZNF564	-	zinc finger protein 564	protein-coding
MEIS1_in_B13ko_peak_3	chr1	1123861	1123861	+	7.07814	NA	Intergenic	Intergenic	-7505	NM_001330306	54991	Hs.235095	NM_017891	ENSG00000131591	C1orf159	-	chromosome 1 open reading frame 159	protein-coding
MEIS1_in_B13ko_peak_1808	chr7	99415606	99415606	+	7.07814	NA	intron (NM_003910, intron 3 of 5)	LTR13|LTR|ERVK	6628	NM_003910	8896	Hs.380233	NM_003910	ENSG00000106245	BUD31	Cwc14|EDG-2|EDG2|G10|YCR063W|fSAP17	BUD31 homolog	protein-coding
MEIS1_in_B13ko_peak_1434	chr3	194769334	194769334	+	7.07814	NA	intron (NR_037891, intron 3 of 3)	intron (NR_037891, intron 3 of 3)	60913	NR_037891	100507391	Hs.590099	NR_037891	ENSG00000237222	LINC01968	-	long intergenic non-protein coding RNA 1968	ncRNA
MEIS1_in_B13ko_peak_1735	chr7	23273373	23273373	+	7.07814	NA	intron (NM_001005340, intron 9 of 10)	intron (NM_001005340, intron 9 of 10)	-25948	NM_138446	115416	Hs.87385	NM_138446	ENSG00000156928	MALSU1	C7orf30|mtRsfA	mitochondrial assembly of ribosomal large subunit 1	protein-coding
MEIS1_in_B13ko_peak_1912	chr8	87515311	87515311	+	7.07814	NA	Intergenic	THE1D-int|LTR|ERVL-MaLR	358757	NM_152418	138009	Hs.371738	NM_152418	ENSG00000176566	DCAF4L2	WDR21C	DDB1 and CUL4 associated factor 4 like 2	protein-coding
MEIS1_in_B13ko_peak_786	chr16	22195755	22195755	+	7.07814	NA	Intergenic	tRNA-Leu-CTA|tRNA|tRNA	-10516	NM_013302	29904	Hs.498892	NM_013302	ENSG00000103319	EEF2K	HSU93850|eEF-2K	eukaryotic elongation factor 2 kinase	protein-coding
MEIS1_in_B13ko_peak_1639	chr6	26568839	26568839	+	7.07814	NA	promoter-TSS (NR_134611)	promoter-TSS (NR_134611)	-485	NR_134611	105374988	Hs.551772	NR_134611	ENSG00000284607	LOC105374988	-	uncharacterized LOC105374988	ncRNA
MEIS1_in_B13ko_peak_1887	chr8	27583801	27583801	+	7.07814	NA	Intergenic	Intergenic	26950	NR_106902	102465508		NR_106902	ENSG00000284280	MIR6843	hsa-mir-6843	microRNA 6843	ncRNA
MEIS1_in_B13ko_peak_1486	chr4	95549609	95549609	+	7.07814	NA	promoter-TSS (NM_003728)	promoter-TSS (NM_003728)	-399	NM_003728	8633	Hs.388565	NM_003728	ENSG00000182168	UNC5C	UNC5H3	unc-5 netrin receptor C	protein-coding
MEIS1_in_B13ko_peak_651	chr13	113726005	113726005	+	7.07814	NA	intron (NM_002929, intron 4 of 6)	CpG	25084	NR_028064	100130386	Hs.704121	NM_001137672	ENSG00000279770	LINC00552	-	long intergenic non-protein coding RNA 552	ncRNA
MEIS1_in_B13ko_peak_658	chr14	20630425	20630425	+	7.07814	NA	Intergenic	Intergenic	11266	NM_001001968	341799	Hs.513132	NM_001001968	ENSG00000181803	OR6S1	OR14-37|OR6S1Q	olfactory receptor family 6 subfamily S member 1	protein-coding
MEIS1_in_B13ko_peak_538	chr12	75511761	75511761	+	7.07758	NA	promoter-TSS (NM_007043)	promoter-TSS (NM_007043)	-123	NM_007043	11103	Hs.645517	NM_007043	ENSG00000111615	KRR1	HRB2|RIP-1	KRR1, small subunit processome component homolog	protein-coding
MEIS1_in_B13ko_peak_1209	chr21	8460779	8460779	+	7.06824	NA	Intergenic	(TCTC)n|Simple_repeat|Simple_repeat	19633	NR_003287	100008589		NR_003287		RNA28SN5	RN28S1|RNA28S5	RNA, 28S ribosomal N5	rRNA
MEIS1_in_B13ko_peak_1289	chr22_KI270733v1_random	151075	151075	+	7.03166	NA	Intergenic	Intergenic	-19140	NR_037458
MEIS1_in_B13ko_peak_156	chr1	152109043	152109043	+	7.03108	NA	exon (NM_007113, exon 3 of 3)	exon (NM_007113, exon 3 of 3)	6411	NM_007113	7062	Hs.432416	NM_007113	ENSG00000159450	TCHH	THH|THL|TRHY|UHS3	trichohyalin	protein-coding
MEIS1_in_B13ko_peak_365	chr10	133649319	133649319	+	7.00469	NA	Intergenic	Intergenic	-22524	NM_001080998	441581	Hs.690471	NM_001080998	ENSG00000225899	FRG2B	-	FSHD region gene 2 family member B	protein-coding
MEIS1_in_B13ko_peak_1565	chr5	114362437	114362437	+	7.00469	NA	5' UTR (NM_001278204, exon 1 of 7)	5' UTR (NM_001278204, exon 1 of 7)	118	NM_021614	3781	Hs.98280	NM_021614	ENSG00000080709	KCNN2	KCa2.2|SK2|SKCA2|SKCa 2|hSK2	potassium calcium-activated channel subfamily N member 2	protein-coding
MEIS1_in_B13ko_peak_289	chr1	234373731	234373731	+	6.94685	NA	promoter-TSS (NM_001012985)	promoter-TSS (NM_001012985)	30	NM_001301733	388753	Hs.23198	NM_001012985	ENSG00000168275	COA6	C1orf31|CEMCOX4	cytochrome c oxidase assembly factor 6	protein-coding
MEIS1_in_B13ko_peak_524	chr12	57782730	57782730	+	6.90731	NA	promoter-TSS (NM_001172695)	promoter-TSS (NM_001172695)	-15	NM_005726	10102	Hs.632704	NM_005726	ENSG00000123297	TSFM	EFTS|EFTSMT	Ts translation elongation factor, mitochondrial	protein-coding
MEIS1_in_B13ko_peak_1214	chr21	8811107	8811107	+	6.9046	NA	Intergenic	ACRO1|Satellite|acro	-175892	NR_037421	100500862		NR_037421	ENSG00000275708	MIR3648-1	MIR3648|hsa-mir-3648-1	microRNA 3648-1	ncRNA
MEIS1_in_B13ko_peak_180	chr1	160084306	160084306	+	6.90426	NA	exon (NM_004983, exon 2 of 3)	exon (NM_004983, exon 2 of 3)	2736	NM_004983	3765	Hs.66726	NM_004983	ENSG00000162728	KCNJ9	GIRK3|KIR3.3	potassium voltage-gated channel subfamily J member 9	protein-coding
MEIS1_in_B13ko_peak_1358	chr3	122651779	122651779	+	6.90348	NA	Intergenic	L1PA6|LINE|L1	-29046	NM_017554	54625	Hs.518203	NM_017554	ENSG00000173193	PARP14	ARTD8|BAL2|PARP-14|pART8	poly(ADP-ribose) polymerase family member 14	protein-coding
MEIS1_in_B13ko_peak_1415	chr3	177359997	177359997	+	6.90348	NA	Intergenic	Intergenic	65555	NR_047465	100820709	Hs.518409	NR_047465	ENSG00000203645	LINC00501	-	long intergenic non-protein coding RNA 501	ncRNA
MEIS1_in_B13ko_peak_698	chr14	89053626	89053626	+	6.90348	NA	Intergenic	L1MC1|LINE|L1	229473	NM_144596	123016	Hs.303055	NM_144596	ENSG00000165533	TTC8	BBS8|RP51	tetratricopeptide repeat domain 8	protein-coding
MEIS1_in_B13ko_peak_1869	chr7	152471449	152471449	+	6.90348	NA	Intergenic	THE1A-int|LTR|ERVL-MaLR	7325	NR_027387	100128822	Hs.647112	NR_027387	ENSG00000261455	LINC01003	-	long intergenic non-protein coding RNA 1003	ncRNA
MEIS1_in_B13ko_peak_1126	chr2	188238523	188238523	+	6.90348	NA	intron (NR_126396, intron 1 of 2)	MER41-int|LTR|ERV1	49168	NR_126396	104355152		NR_126396	ENSG00000231689	LINC01090	-	long intergenic non-protein coding RNA 1090	ncRNA
MEIS1_in_B13ko_peak_1280	chr22	50090072	50090072	+	6.90006	NA	promoter-TSS (NM_001164104)	promoter-TSS (NM_001164104)	66	NM_018995	54456	Hs.62880	NM_018995	ENSG00000073146	MOV10L1	CHAMP|DJ402G11.8	Mov10 RISC complex RNA helicase like 1	protein-coding
MEIS1_in_B13ko_peak_1410	chr3	173395608	173395608	+	6.87234	NA	Intergenic	CpG	-2840	NM_014932	22871	Hs.478289	NM_014932	ENSG00000169760	NLGN1	NL1	neuroligin 1	protein-coding
MEIS1_in_B13ko_peak_2021	chrUn_GL000220v1	134981	134981	+	6.84701	NA	Intergenic	CpG	-13723	NR_128717	103504733		NR_128717	ENSG00000275692	MIR6724-4	hsa-mir-6724-4	microRNA 6724-4	ncRNA
MEIS1_in_B13ko_peak_1165	chr20	59042620	59042620	+	6.83792	NA	intron (NM_016045, intron 1 of 5)	CpG	226	NM_016045	51012	Hs.656865	NM_016045	ENSG00000101166	PRELID3B	C20orf45|SLMO2|dJ543J19.5	PRELI domain containing 3B	protein-coding
MEIS1_in_B13ko_peak_1775	chr7	66493631	66493631	+	6.8321	NA	promoter-TSS (NR_134573)	promoter-TSS (NR_134573)	-1	NR_134573	100289098	Hs.662276	NR_134570	ENSG00000237310	GS1-124K5.4	-	uncharacterized LOC100289098	ncRNA
MEIS1_in_B13ko_peak_361	chr10	122954523	122954523	+	6.8321	NA	promoter-TSS (NM_024942)	promoter-TSS (NM_024942)	-120	NM_024942	80007	Hs.501286	NM_024942	ENSG00000119965	C10orf88	-	chromosome 10 open reading frame 88	protein-coding
MEIS1_in_B13ko_peak_1135	chr2	222796912	222796912	+	6.8321	NA	Intergenic	L2a|LINE|L2	-64102	NM_004457	2181	Hs.655772	NM_004457	ENSG00000123983	ACSL3	ACS3|FACL3|LACS 3|LACS3|PRO2194	acyl-CoA synthetase long chain family member 3	protein-coding
MEIS1_in_B13ko_peak_1095	chr2	61764580	61764580	+	6.8321	NA	Intergenic	CpG	89563	NM_032180	84140	Hs.440466	NM_032180	ENSG00000170264	FAM161A	RP28	FAM161A, centrosomal protein	protein-coding
MEIS1_in_B13ko_peak_299	chr1	236795582	236795582	+	6.8321	NA	5' UTR (NM_000254, exon 1 of 33)	5' UTR (NM_000254, exon 1 of 33)	301	NM_001291939	4548	Hs.498187	NM_000254	ENSG00000116984	MTR	HMAG|MS|cblG	5-methyltetrahydrofolate-homocysteine methyltransferase	protein-coding
MEIS1_in_B13ko_peak_70	chr1	93262832	93262832	+	6.8321	NA	intron (NM_206886, intron 26 of 27)	THE1D-int|LTR|ERVL-MaLR	82116	NM_001306076	343099	Hs.482873	NM_206886	ENSG00000122483	CCDC18	NY-SAR-41	coiled-coil domain containing 18	protein-coding
MEIS1_in_B13ko_peak_58	chr1	60965452	60965452	+	6.8321	NA	intron (NR_110617, intron 1 of 6)	THE1C-int|LTR|ERVL-MaLR	5324	NR_110617	100996570	Hs.46616	NR_110617	ENSG00000237928	NFIA-AS2	-	NFIA antisense RNA 2	ncRNA
MEIS1_in_B13ko_peak_455	chr12	6724221	6724221	+	6.8321	NA	promoter-TSS (NM_001164093)	promoter-TSS (NM_001164093)	-62	NM_001164093	50813	Hs.530823	NM_016319	ENSG00000111652	COPS7A	CSN7|CSN7A|SGN7a	COP9 signalosome subunit 7A	protein-coding
MEIS1_in_B13ko_peak_1731	chr7	13312517	13312517	+	6.82717	NA	Intergenic	MER41-int|LTR|ERV1	625231	NM_001195396	10124	Hs.245540	NM_005738	ENSG00000122644	ARL4A	ARL4	ADP ribosylation factor like GTPase 4A	protein-coding
MEIS1_in_B13ko_peak_2017	chrUn_GL000220v1	128539	128539	+	6.82571	NA	Intergenic	HERVIP10FH-int|LTR|ERV1	15191	NR_003287	100008589		NR_003287		RNA28SN5	RN28S1|RNA28S5	RNA, 28S ribosomal N5	rRNA
MEIS1_in_B13ko_peak_1044	chr19	49890164	49890164	+	6.80847	NA	exon (NM_152899, exon 8 of 8)	exon (NM_152899, exon 8 of 8)	1989	NR_039905	100616314		NR_039905	ENSG00000284394	MIR4750	mir-4750	microRNA 4750	ncRNA
MEIS1_in_B13ko_peak_1595	chr5	179678933	179678933	+	6.80029	NA	exon (NM_001164444, exon 2 of 2)	exon (NM_001164444, exon 2 of 2)	2041	NM_001164444	646019	Hs.535767	NM_001164444	ENSG00000204659	CBY3	-	chibby family member 3	protein-coding
MEIS1_in_B13ko_peak_907	chr17	74213483	74213483	+	6.80029	NA	promoter-TSS (NR_026914)	promoter-TSS (NR_026914)	-74	NM_032646	94015	Hs.27935	NM_032646	ENSG00000141540	TTYH2	C17orf29	tweety family member 2	protein-coding
MEIS1_in_B13ko_peak_1525	chr5	29780741	29780741	+	6.80029	NA	Intergenic	Intergenic	-99819	NR_134264	105374704	Hs.151157	NR_134264		LOC105374704	-	uncharacterized LOC105374704	ncRNA
MEIS1_in_B13ko_peak_1825	chr7	105014135	105014135	+	6.80029	NA	promoter-TSS (NM_182931)	promoter-TSS (NM_182931)	6	NR_024586	100216545	Hs.631150	NR_024586		KMT2E-AS1	-	KMT2E antisense RNA 1	ncRNA
MEIS1_in_B13ko_peak_586	chr12	122111435	122111435	+	6.80029	NA	intron (NM_014938, intron 1 of 16)	intron (NM_014938, intron 1 of 16)	32707	NM_014938	22877	Hs.437153	NM_014938	ENSG00000175727	MLXIP	MIR|MONDOA|bHLHe36	MLX interacting protein	protein-coding
MEIS1_in_B13ko_peak_312	chr1	247008172	247008172	+	6.74605	NA	promoter-TSS (NM_001204221)	promoter-TSS (NM_001204221)	-79	NR_037892	57116	Hs.669893	NM_020394	ENSG00000197472	ZNF695	SBZF3	zinc finger protein 695	protein-coding
MEIS1_in_B13ko_peak_1047	chr19	50139237	50139237	+	6.74014	NA	promoter-TSS (NR_024230).2	promoter-TSS (NR_024230).2	0	NR_024231	100170224	Hs.446545	NR_024231		SNAR-B1	-	small ILF3/NF90-associated RNA B1	snRNA
MEIS1_in_B13ko_peak_1493	chr4	105474129	105474129	+	6.73737	NA	promoter-TSS (NM_006903)	promoter-TSS (NM_006903)	-59	NM_006903	27068	Hs.654957	NM_006903	ENSG00000138777	PPA2	HSPC124|SCFAI|SCFI|SID6-306	pyrophosphatase (inorganic) 2	protein-coding
MEIS1_in_B13ko_peak_168	chr1	156054702	156054702	+	6.70322	NA	promoter-TSS (NM_001145264)	promoter-TSS (NM_001145264)	-24	NM_014017	28956	Hs.632483	NM_014017	ENSG00000116586	LAMTOR2	ENDAP|HSPC003|MAPBPIP|MAPKSP1AP|ROBLD3|Ragulator2|p14	late endosomal/lysosomal adaptor, MAPK and MTOR activator 2	protein-coding
MEIS1_in_B13ko_peak_1721	chr7	873545	873545	+	6.68708	NA	3' UTR (NM_025154, exon 18 of 18)	3' UTR (NM_025154, exon 18 of 18)	-3009	NM_015949	51608	Hs.107387	NM_015949	ENSG00000239857	GET4	C7orf20|CEE|CGI-20|TRC35	golgi to ER traffic protein 4	protein-coding
MEIS1_in_B13ko_peak_1377	chr3	133487010	133487010	+	6.68685	NA	intron (NR_135276, intron 1 of 4)	MER52A|LTR|ERV1	4136	NR_135277	85003	Hs.659202	NR_135276	ENSG00000249993	BFSP2-AS1	-	BFSP2 antisense RNA 1	ncRNA
MEIS1_in_B13ko_peak_1292	chr22_KI270733v1_random	162334	162334	+	6.68546	NA	Intergenic	Intergenic	-7881	NR_037458
MEIS1_in_B13ko_peak_601	chr12	132241453	132241453	+	6.68048	NA	intron (NM_001122636, intron 6 of 10)	intron (NM_001122636, intron 6 of 10)	-33938	NR_024563	100130238	Hs.536338	NR_024563		LOC100130238	-	uncharacterized LOC100130238	ncRNA
MEIS1_in_B13ko_peak_194	chr1	161469474	161469474	+	6.67325	NA	Intergenic	CpG	-35941	NM_021642	2212	Hs.352642	NM_021642	ENSG00000143226	FCGR2A	CD32|CD32A|CDw32|FCG2|FCGR2|FCGR2A1|FcGR|IGFR2	Fc fragment of IgG receptor IIa	protein-coding
MEIS1_in_B13ko_peak_201	chr1	165630834	165630834	+	6.65875	NA	promoter-TSS (NM_004528)	promoter-TSS (NM_004528)	-39	NM_004528	4259	Hs.191734	NM_004528	ENSG00000143198	MGST3	GST-III	microsomal glutathione S-transferase 3	protein-coding
MEIS1_in_B13ko_peak_607	chr12	133080428	133080428	+	6.63773	NA	5' UTR (NM_001300776, exon 1 of 4)	5' UTR (NM_001300776, exon 1 of 4)	225	NM_001300777	7699	Hs.181552	NM_003440	ENSG00000196387	ZNF140	pHZ-39	zinc finger protein 140	protein-coding
MEIS1_in_B13ko_peak_640	chr13	81988035	81988035	+	6.63469	NA	Intergenic	MER67C|LTR|ERV1	-761052	NR_047494	100861546	Hs.539621	NR_047494	ENSG00000260094	LINC00564	-	long intergenic non-protein coding RNA 564	ncRNA
MEIS1_in_B13ko_peak_249	chr1	203795563	203795563	+	6.58786	NA	promoter-TSS (NM_014827)	promoter-TSS (NM_014827)	26	NM_001319239	9877	Hs.532399	NM_014827	ENSG00000058673	ZC3H11A	ZC3HDC11A	zinc finger CCCH-type containing 11A	protein-coding
MEIS1_in_B13ko_peak_216	chr1	180229014	180229014	+	6.57643	NA	Intergenic	CpG	-1284	NM_033343	89884	Hs.658487	NM_033343	ENSG00000121454	LHX4	CPHD4	LIM homeobox 4	protein-coding
MEIS1_in_B13ko_peak_1361	chr3	126267609	126267609	+	6.57148	NA	Intergenic	CpG	-86423	NM_001270364	10840	Hs.434435	NM_012190	ENSG00000144908	ALDH1L1	10-FTHFDH|10-fTHF|FDH|FTHFD	aldehyde dehydrogenase 1 family member L1	protein-coding
MEIS1_in_B13ko_peak_1062	chr19	58606457	58606457	+	6.57148	NA	Intergenic	TAR1|Satellite|telo	31058	NR_026052	65996	Hs.541177	NM_023939	ENSG00000213753	CENPBD1P1	-	CENPB DNA-binding domains containing 1 pseudogene 1	pseudo
MEIS1_in_B13ko_peak_693	chr14	73569821	73569821	+	6.57148	NA	exon (NM_006821, exon 1 of 3)	exon (NM_006821, exon 1 of 3)	762	NM_006821	10965	Hs.446685	NM_006821	ENSG00000119673	ACOT2	CTE-IA|CTE1A|MTE1|PTE2|PTE2A|ZAP128	acyl-CoA thioesterase 2	protein-coding
MEIS1_in_B13ko_peak_1519	chr5	1800033	1800033	+	6.57148	NA	promoter-TSS (NM_032479)	promoter-TSS (NM_032479)	-191	NM_032479	64979	Hs.719465	NM_032479	ENSG00000171421	MRPL36	BRIP1|L36mt|MRP-L36|PRPL36|RPMJ	mitochondrial ribosomal protein L36	protein-coding
MEIS1_in_B13ko_peak_931	chr18	96998	96998	+	6.56954	NA	Intergenic	TAR1|Satellite|telo	-12067	NR_033770	727758	Hs.585843	NR_033770	ENSG00000263006	ROCK1P1	-	Rho associated coiled-coil containing protein kinase 1 pseudogene 1	pseudo
MEIS1_in_B13ko_peak_165	chr1	155085454	155085454	+	6.54089	NA	intron (NM_004952, intron 2 of 4)	CpG-1788	6582	NM_004952	1944	Hs.516656	NM_004952	ENSG00000143590	EFNA3	EFL2|EPLG3|Ehk1-L|LERK3	ephrin A3	protein-coding
MEIS1_in_B13ko_peak_1878	chr7	158149107	158149107	+	6.52064	NA	intron (NM_130843, intron 6 of 21)	intron (NM_130843, intron 6 of 21)	294522	NR_038966	100506585	Hs.661265	NR_038966	ENSG00000233038	LOC100506585	-	uncharacterized LOC100506585	ncRNA
MEIS1_in_B13ko_peak_150	chr1	151071247	151071247	+	6.49734	NA	intron (NM_001323909, intron 1 of 7)	G-rich|Low_complexity|Low_complexity	643	NM_144618	126626	Hs.15671	NM_144618	ENSG00000143458	GABPB2	GABPB-2	GA binding protein transcription factor subunit beta 2	protein-coding
MEIS1_in_B13ko_peak_286	chr1	230083105	230083105	+	6.49734	NA	intron (NM_004481, intron 1 of 15)	intron (NM_004481, intron 1 of 15)	15910	NM_004481	2590	Hs.743964	NM_004481	ENSG00000143641	GALNT2	GalNAc-T2	polypeptide N-acetylgalactosaminyltransferase 2	protein-coding
MEIS1_in_B13ko_peak_196	chr1	161530372	161530372	+	6.48646	NA	Intergenic	tRNA-Leu-CTG|tRNA|tRNA	5832	NM_002155	3310	Hs.654614	NM_002155	ENSG00000173110	HSPA6	HSP70B'	heat shock protein family A (Hsp70) member 6	protein-coding
MEIS1_in_B13ko_peak_149	chr1	151070560	151070560	+	6.45739	NA	promoter-TSS (NM_001323907)	promoter-TSS (NM_001323907)	-18	NM_001323907	126626	Hs.15671	NM_144618	ENSG00000143458	GABPB2	GABPB-2	GA binding protein transcription factor subunit beta 2	protein-coding
MEIS1_in_B13ko_peak_242	chr1	201955306	201955306	+	6.44324	NA	promoter-TSS (NM_006335)	promoter-TSS (NM_006335)	-185	NM_006335	10440	Hs.20716	NM_006335	ENSG00000134375	TIMM17A	TIM17|TIM17A	translocase of inner mitochondrial membrane 17A	protein-coding
MEIS1_in_B13ko_peak_605	chr12	132908367	132908367	+	6.43871	NA	Intergenic	CpG	20525	NR_110919	101928530	Hs.560003	NR_110919	ENSG00000236617	LOC101928530	-	uncharacterized LOC101928530	ncRNA
MEIS1_in_B13ko_peak_1823	chr7	102592696	102592696	+	6.43871	NA	intron (NM_001079877, intron 15 of 19)	intron (NM_001079877, intron 15 of 19)	-20075	NM_001097615	548644	Hs.610255	NM_001015884	ENSG00000168255	POLR2J3	POLR2J2|RPB11b1|RPB11b2	RNA polymerase II subunit J3	protein-coding
MEIS1_in_B13ko_peak_495	chr12	49060744	49060744	+	6.43871	NA	Intergenic	CpG	-5420	NM_003482	8085	Hs.731384	NM_003482	ENSG00000167548	KMT2D	AAD10|ALR|CAGL114|KABUK1|KMS|MLL2|MLL4|TNRC21	lysine methyltransferase 2D	protein-coding
MEIS1_in_B13ko_peak_1813	chr7	100071423	100071423	+	6.43871	NA	exon (NM_001318135, exon 6 of 6)	exon (NM_001318135, exon 6 of 6)	10341	NM_001278292	7551	Hs.435302	NM_017715	ENSG00000166526	ZNF3	A8-51|HF.12|KOX25|PP838|Zfp113	zinc finger protein 3	protein-coding
MEIS1_in_B13ko_peak_1063	chr19	58607570	58607570	+	6.43871	NA	Intergenic	(GGGTTA)n|Simple_repeat|Simple_repeat	32171	NR_026052	65996	Hs.541177	NM_023939	ENSG00000213753	CENPBD1P1	-	CENPB DNA-binding domains containing 1 pseudogene 1	pseudo
MEIS1_in_B13ko_peak_999	chr19	13012132	13012132	+	6.43871	NA	intron (NM_002501, intron 1 of 9)	CpG	-11839	NM_001271044	4784	Hs.257970	NM_002501	ENSG00000008441	NFIX	CTF|MRSHSS|NF-I/X|NF1-X|NF1A|SOTOS2	nuclear factor I X	protein-coding
MEIS1_in_B13ko_peak_1398	chr3	152835429	152835429	+	6.43871	NA	5' UTR (NM_002563, exon 1 of 1)	5' UTR (NM_002563, exon 1 of 1)	736	NM_002563	5028	Hs.79881	NM_002563	ENSG00000169860	P2RY1	P2Y1|SARCC	purinergic receptor P2Y1	protein-coding
MEIS1_in_B13ko_peak_1908	chr8	73976093	73976093	+	6.42173	NA	promoter-TSS (NR_033334)	promoter-TSS (NR_033334)	-49	NM_017866	54968	Hs.106650	NM_017866	ENSG00000175606	TMEM70	MC5DN2	transmembrane protein 70	protein-coding
MEIS1_in_B13ko_peak_363	chr10	126947464	126947464	+	6.42173	NA	intron (NM_001380, intron 1 of 51)	intron (NM_001380, intron 1 of 51)	42055	NM_001380	1793	Hs.159195	NM_001380	ENSG00000150760	DOCK1	DOCK180|ced5	dedicator of cytokinesis 1	protein-coding
MEIS1_in_B13ko_peak_1120	chr2	161281770	161281770	+	6.42077	NA	Intergenic	Intergenic	-26505	NM_005805	10213	Hs.740477	NM_005805	ENSG00000115233	PSMD14	PAD1|POH1|RPN11	proteasome 26S subunit, non-ATPase 14	protein-coding
MEIS1_in_B13ko_peak_1226	chr21	10342743	10342743	+	6.41634	NA	Intergenic	Intergenic	-70777	NM_001187	574	Hs.545789	NM_001187		BAGE	BAGE1|CT2.1	B melanoma antigen	protein-coding
MEIS1_in_B13ko_peak_1205	chr21	8452069	8452069	+	6.3883	NA	Intergenic	AluSz|SINE|Alu	10923	NR_003287	100008589		NR_003287		RNA28SN5	RN28S1|RNA28S5	RNA, 28S ribosomal N5	rRNA
MEIS1_in_B13ko_peak_1386	chr3	148563665	148563665	+	6.35058	NA	Intergenic	Intergenic	-134206	NM_004835	185	Hs.477887	NM_000685	ENSG00000144891	AGTR1	AG2S|AGTR1B|AT1|AT1AR|AT1B|AT1BR|AT1R|AT2R1|HAT1R	angiotensin II receptor type 1	protein-coding
MEIS1_in_B13ko_peak_1334	chr3	82217372	82217372	+	6.33037	NA	Intergenic	Intergenic	-455573	NM_000158	2632	Hs.436062	NM_000158	ENSG00000114480	GBE1	APBD|GBE|GSD4	1,4-alpha-glucan branching enzyme 1	protein-coding
MEIS1_in_B13ko_peak_572	chr12	113153363	113153363	+	6.33037	NA	exon (NM_001144872, exon 4 of 8)	exon (NM_001144872, exon 4 of 8)	3505	NM_001144872	387885	Hs.486856	NM_001144872	ENSG00000186710	CFAP73	CCDC42B|MIA2	cilia and flagella associated protein 73	protein-coding
MEIS1_in_B13ko_peak_1146	chr2	242182168	242182168	+	6.33037	NA	Intergenic	TAR1|Satellite|telo	93535	NR_130699	728323	Hs.380737	NR_024437		LINC01881	-	long intergenic non-protein coding RNA 1881	ncRNA
MEIS1_in_B13ko_peak_1512	chr4	189234455	189234455	+	6.28171	NA	Intergenic	Intergenic	-425151	NR_121679	101928971	Hs.519164	NR_121679	ENSG00000250739	LINC01262	TCONS_l2_00021807	long intergenic non-protein coding RNA 1262	ncRNA
MEIS1_in_B13ko_peak_1339	chr3	91891304	91891304	+	6.27688	NA	Intergenic	ACRO1|Satellite|acro	2082777	NM_001314077	5627	Hs.64016	NM_000313	ENSG00000184500	PROS1	PROS|PS21|PS22|PS23|PS24|PS25|PSA|THPH5|THPH6	protein S	protein-coding
MEIS1_in_B13ko_peak_1018	chr19	38619013	38619013	+	6.27477	NA	promoter-TSS (NM_007181)	promoter-TSS (NM_007181)	-59	NM_001308393	27335	Hs.314359	NM_013234	ENSG00000178982	EIF3K	ARG134|EIF3-p28|EIF3S12|HSPC029|M9|MSTP001|PLAC-24|PLAC24|PRO1474|PTD001	eukaryotic translation initiation factor 3 subunit K	protein-coding
MEIS1_in_B13ko_peak_1948	chr9	35657794	35657794	+	6.27477	NA	promoter-TSS (NM_001195200)	promoter-TSS (NM_001195200)	224	NR_003051	6023	Hs.587502	NR_003051	ENSG00000269900	RMRP	CHH|NME1|RMRPR|RRP2	RNA component of mitochondrial RNA processing endoribonuclease	ncRNA
MEIS1_in_B13ko_peak_131	chr1	149813477	149813477	+	6.27477	NA	exon (NM_001123375, exon 1 of 1)	exon (NM_001123375, exon 1 of 1)	204	NM_001123375	653604	Hs.712062	NM_001123375	ENSG00000183598	HIST2H3D	-	histone cluster 2 H3 family member d	protein-coding
MEIS1_in_B13ko_peak_1904	chr8	66870779	66870779	+	6.27477	NA	promoter-TSS (NM_001136161)	promoter-TSS (NM_001136161)	30	NM_173518	157777	Hs.437006	NM_173518	ENSG00000178460	MCMDC2	C8orf45	minichromosome maintenance domain containing 2	protein-coding
MEIS1_in_B13ko_peak_376	chr11	14892432	14892432	+	6.27477	NA	promoter-TSS (NM_024514)	promoter-TSS (NM_024514)	-227	NM_024514	120227	Hs.371427	NM_024514	ENSG00000186104	CYP2R1	-	cytochrome P450 family 2 subfamily R member 1	protein-coding
MEIS1_in_B13ko_peak_766	chr16	2682453	2682453	+	6.27477	NA	promoter-TSS (NM_018992)	promoter-TSS (NM_018992)	-41	NM_018992	54442	Hs.61960	NM_018992	ENSG00000167977	KCTD5	-	potassium channel tetramerization domain containing 5	protein-coding
MEIS1_in_B13ko_peak_1506	chr4	151947144	151947144	+	6.27477	NA	Intergenic	THE1C-int|LTR|ERVL-MaLR	-153609	NR_121628	100996286	Hs.322462	NR_121627	ENSG00000245954	LINC02273	-	long intergenic non-protein coding RNA 2273	ncRNA
MEIS1_in_B13ko_peak_415	chr11	69646898	69646898	+	6.27477	NA	intron (NM_053056, intron 3 of 4)	intron (NM_053056, intron 3 of 4)	5793	NM_053056	595	Hs.523852	NM_053056	ENSG00000110092	CCND1	BCL1|D11S287E|PRAD1|U21B31	cyclin D1	protein-coding
MEIS1_in_B13ko_peak_697	chr14	85533321	85533321	+	6.27477	NA	promoter-TSS (NR_144385)	promoter-TSS (NR_144385)	-1	NM_001346143	23768	Hs.533710	NM_013231	ENSG00000185070	FLRT2	-	fibronectin leucine rich transmembrane protein 2	protein-coding
MEIS1_in_B13ko_peak_914	chr17	76075508	76075508	+	6.27477	NA	intron (NM_003857, intron 1 of 1)	CpG	707	NM_003857	8811	Hs.666366	NM_003857	ENSG00000182687	GALR2	GAL2-R|GALNR2|GALR-2	galanin receptor 2	protein-coding
MEIS1_in_B13ko_peak_670	chr14	32308337	32308337	+	6.27477	NA	Intergenic	Intergenic	-20936	NM_004274	9472	Hs.509083	NM_004274	ENSG00000151320	AKAP6	ADAP100|ADAP6|AKAP100|PRKA6|mAKAP	A-kinase anchoring protein 6	protein-coding
MEIS1_in_B13ko_peak_826	chr17	7243109	7243109	+	6.27477	NA	promoter-TSS (NM_007278)	promoter-TSS (NM_007278)	-675	NM_007278	11337	Hs.647421	NM_007278	ENSG00000170296	GABARAP	ATG8A|GABARAP-a|MM46	GABA type A receptor-associated protein	protein-coding
MEIS1_in_B13ko_peak_552	chr12	95738194	95738194	+	6.27477	NA	intron (NM_001329701, intron 2 of 9)	intron (NM_001329701, intron 2 of 9)	52001	NM_001329702	59277	Hs.201034	NM_021229	ENSG00000074527	NTN4	PRO3091	netrin 4	protein-coding
MEIS1_in_B13ko_peak_971	chr19	2427694	2427694	+	6.27477	NA	TTS (NM_032737)	TTS (NM_032737)	222	NM_012458	26517	Hs.75056	NM_012458	ENSG00000099800	TIMM13	TIM13|TIM13B|TIMM13A|TIMM13B|ppv1	translocase of inner mitochondrial membrane 13	protein-coding
MEIS1_in_B13ko_peak_326	chr10	74096	74096	+	6.27477	NA	Intergenic	CpG	-24858	NM_177987	347688	Hs.532659	NM_177987	ENSG00000261456	TUBB8	OOMD|OOMD2|bA631M21.2	tubulin beta 8 class VIII	protein-coding
MEIS1_in_B13ko_peak_1457	chr4	25312725	25312725	+	6.27477	NA	promoter-TSS (NM_001318148)	promoter-TSS (NM_001318148)	-49	NM_024936	29063	Hs.278945	NM_024936	ENSG00000168228	ZCCHC4	HSPC052|ZGRF4	zinc finger CCHC-type containing 4	protein-coding
MEIS1_in_B13ko_peak_1931	chr8	144842128	144842128	+	6.27477	NA	exon (NM_001282797, exon 4 of 4)	exon (NM_001282797, exon 4 of 4)	10939	NM_001287237	28991	Hs.493218	NM_014066	ENSG00000170619	COMMD5	HCARG|HT002	COMM domain containing 5	protein-coding
MEIS1_in_B13ko_peak_758	chr15_KI270905v1_alt	2458113	2458113	+	6.27477	NA	Intergenic	(GT)n|Simple_repeat|Simple_repeat	-22843	NR_026771	26082	Hs.652128	NR_026771	ENSG00000225930	LINC02249	DKFZP434L187	long intergenic non-protein coding RNA 2249	ncRNA
MEIS1_in_B13ko_peak_930	chr18	75995	75995	+	6.27477	NA	Intergenic	CpG	-33070	NR_033770	727758	Hs.585843	NR_033770	ENSG00000263006	ROCK1P1	-	Rho associated coiled-coil containing protein kinase 1 pseudogene 1	pseudo
MEIS1_in_B13ko_peak_7	chr1	1330090	1330090	+	6.27477	NA	Intergenic	(TGCA)n|Simple_repeat|Simple_repeat	-1256	NM_152228	83756	Hs.74375	NM_152228	ENSG00000169962	TAS1R3	T1R3	taste 1 receptor member 3	protein-coding
MEIS1_in_B13ko_peak_776	chr16	3383206	3383206	+	6.27477	NA	exon (NM_001284527, exon 7 of 7)	exon (NM_001284527, exon 7 of 7)	-10923	NM_001190476	100463285	Hs.639648	NM_001190476	ENSG00000232196	MTRNR2L4	HN4	MT-RNR2 like 4	protein-coding
MEIS1_in_B13ko_peak_1783	chr7	76166636	76166636	+	6.27477	NA	Intergenic	CpG	-35257	NM_001110199	222183	Hs.511025	NM_001039212	ENSG00000177679	SRRM3	-	serine/arginine repetitive matrix 3	protein-coding
MEIS1_in_B13ko_peak_679	chr14	49862629	49862629	+	6.27477	NA	TTS (NR_027260)	TTS (NR_027260)	220	NR_027260	378706		NR_027260	ENSG00000274012	RN7SL2	7L1C|7L30.1|7SL1c|RNSRP2	RNA, 7SL, cytoplasmic 2	scRNA
MEIS1_in_B13ko_peak_1683	chr6	100229042	100229042	+	6.27477	NA	Intergenic	CpG	234633	NM_005068	6492	Hs.520293	NM_005068	ENSG00000112246	SIM1	bHLHe14	SIM bHLH transcription factor 1	protein-coding
MEIS1_in_B13ko_peak_926	chr17_GL383563v3_alt	74555	74555	+	6.27477	NA	Intergenic	TAR1|Satellite|telo	-3016	NM_001097610	653486	Hs.127059	NM_001097610	ENSG00000268320	SCGB1C2	-	secretoglobin family 1C member 2	protein-coding
MEIS1_in_B13ko_peak_1979	chr9	121369894	121369894	+	6.27477	NA	intron (NR_073037, intron 1 of 7)	CpG	410	NM_001270526	2040	Hs.253903	NM_004099	ENSG00000148175	STOM	BND7|EPB7|EPB72	stomatin	protein-coding
MEIS1_in_B13ko_peak_895	chr17	58659188	58659188	+	6.27477	NA	intron (NM_198393, intron 1 of 32)	U1|snRNA|snRNA	32867	NM_001201457	56155	Hs.390221	NM_031272	ENSG00000121101	TEX14	CT113|SPGF23	testis expressed 14, intercellular bridge forming factor	protein-coding
MEIS1_in_B13ko_peak_577	chr12	120234930	120234930	+	6.27477	NA	intron (NM_001080855, intron 1 of 11)	intron (NM_001080855, intron 1 of 11)	15231	NM_025157	5829	Hs.446336	NM_002859	ENSG00000089159	PXN	-	paxillin	protein-coding
MEIS1_in_B13ko_peak_1661	chr6	28213054	28213054	+	6.27477	NA	Intergenic	tRNA-Ser-AGY|tRNA|tRNA	5875	NR_002936	222699	Hs.161441	NR_002936		TOB2P1	TOB2P|TOB4p|p373c6.3	transducer of ERBB2, 2 pseudogene 1	pseudo
MEIS1_in_B13ko_peak_1298	chr2_KI270767v1_alt	48560	48560	+	6.27477	NA	intron (NR_110220, intron 1 of 1)	CpG	39182	NR_110592	102723927	Hs.733585	NR_110592	ENSG00000237940	LINC01238	-	long intergenic non-protein coding RNA 1238	ncRNA
MEIS1_in_B13ko_peak_69	chr1	93079193	93079193	+	6.27477	NA	promoter-TSS (NM_001164391)	promoter-TSS (NM_001164391)	-42	NM_001164392	22823	Hs.31016	NM_007358	ENSG00000143033	MTF2	M96|PCL2|TDRD19A|dJ976O13.2	metal response element binding transcription factor 2	protein-coding
MEIS1_in_B13ko_peak_1167	chr20	63956498	63956498	+	6.27477	NA	promoter-TSS (NM_017859)	promoter-TSS (NM_017859)	-51	NR_126526	54963	Hs.504998	NM_017859	ENSG00000198276	UCKL1	UCK1L|URKL1	uridine-cytidine kinase 1 like 1	protein-coding
MEIS1_in_B13ko_peak_375	chr11	14891621	14891621	+	6.27477	NA	intron (NM_024514, intron 1 of 4)	CpG	584	NM_024514	120227	Hs.371427	NM_024514	ENSG00000186104	CYP2R1	-	cytochrome P450 family 2 subfamily R member 1	protein-coding
MEIS1_in_B13ko_peak_1045	chr19	50026055	50026055	+	6.27477	NA	promoter-TSS (NM_001308420)	promoter-TSS (NM_001308420)	162	NM_015428	25888	Hs.440553	NM_015428	ENSG00000142528	ZNF473	ZFP100|ZN473	zinc finger protein 473	protein-coding
MEIS1_in_B13ko_peak_31	chr1	25998381	25998381	+	6.27477	NA	promoter-TSS (NM_000437)	promoter-TSS (NM_000437)	-224	NM_000437	5051	Hs.477083	NM_000437	ENSG00000158006	PAFAH2	HSD-PLA2	platelet activating factor acetylhydrolase 2	protein-coding
MEIS1_in_B13ko_peak_438	chr11	125887426	125887426	+	6.27477	NA	5' UTR (NM_001134793, exon 1 of 3)	5' UTR (NM_001134793, exon 1 of 3)	366	NM_001134793	219844	Hs.98133	NM_145014	ENSG00000198331	HYLS1	HLS	HYLS1, centriolar and ciliogenesis associated	protein-coding
MEIS1_in_B13ko_peak_522	chr12	57462477	57462477	+	6.27477	NA	intron (NM_001160045, intron 1 of 9)	intron (NM_001160045, intron 1 of 9)	2326	NM_005269	2735	Hs.632702	NM_005269	ENSG00000111087	GLI1	GLI	GLI family zinc finger 1	protein-coding
MEIS1_in_B13ko_peak_395	chr11	59557568	59557568	+	6.27477	NA	Intergenic	tRNA-Phe-TTY|tRNA|tRNA	37590	NR_036120	100422880		NR_036120	ENSG00000264559	MIR3162	mir-3162	microRNA 3162	ncRNA
MEIS1_in_B13ko_peak_257	chr1	206612493	206612493	+	6.27477	NA	promoter-TSS (NM_001201478)	promoter-TSS (NM_001201478)	58	NM_001201478	1939	Hs.497581	NM_006893	ENSG00000143486	EIF2D	HCA56|LGTN	eukaryotic translation initiation factor 2D	protein-coding
MEIS1_in_B13ko_peak_928	chr17_KI270861v1_alt	169121	169121	+	6.27477	NA	TTS (NM_001163673).2	TTS (NM_001163673).2	-2667	NM_000934	5345	Hs.159509	NM_000934	ENSG00000167711	SERPINF2	A2AP|AAP|ALPHA-2-PI|API|PLI	serpin family F member 2	protein-coding
MEIS1_in_B13ko_peak_1681	chr6	98832682	98832682	+	6.27477	NA	Intergenic	CpG	-2022	NM_005604	5454	Hs.182505	NM_005604	ENSG00000184486	POU3F2	BRN2|N-Oct3|OCT7|OTF-7|OTF7|POUF3|brn-2|oct-7	POU class 3 homeobox 2	protein-coding
MEIS1_in_B13ko_peak_885	chr17	44015035	44015035	+	6.27477	NA	promoter-TSS (NM_032376)	promoter-TSS (NM_032376)	-6	NM_032376	84336	Hs.514211	NM_032376	ENSG00000091947	TMEM101	-	transmembrane protein 101	protein-coding
MEIS1_in_B13ko_peak_783	chr16	15857092	15857092	+	6.27477	NA	promoter-TSS (NM_001040113)	promoter-TSS (NM_001040113)	-62	NM_001040113	4629	Hs.460109	NM_002474	ENSG00000133392	MYH11	AAT4|FAA4|SMHC|SMMHC	myosin heavy chain 11	protein-coding
MEIS1_in_B13ko_peak_629	chr13	51583929	51583929	+	6.27477	NA	promoter-TSS (NM_052950)	promoter-TSS (NM_052950)	-419	NM_052950	115825	Hs.46506	NM_052950	ENSG00000139668	WDFY2	PROF|WDF2|ZFYVE22	WD repeat and FYVE domain containing 2	protein-coding
MEIS1_in_B13ko_peak_704	chr14	106664136	106664136	+	6.27477	NA	Intergenic	Intergenic	27425	NR_106988
MEIS1_in_B13ko_peak_1589	chr5	176591827	176591827	+	6.27477	NA	intron (NM_017675, intron 30 of 31)	(GGT)n|Simple_repeat|Simple_repeat	18303	NM_052899	114787	Hs.150549	NM_052899	ENSG00000169258	GPRIN1	GRIN1	G protein regulated inducer of neurite outgrowth 1	protein-coding
MEIS1_in_B13ko_peak_1327	chr3	53347662	53347662	+	6.27477	NA	promoter-TSS (NM_001290204)	promoter-TSS (NM_001290204)	-35	NM_001290206	55802	Hs.476353	NM_018403	ENSG00000272886	DCP1A	HSA275986|Nbla00360|SMAD4IP1|SMIF	decapping mRNA 1A	protein-coding
MEIS1_in_B13ko_peak_680	chr14	54459323	54459323	+	6.27477	NA	Intergenic	THE1D-int|LTR|ERVL-MaLR	-17893	NM_005776	10175	Hs.294603	NM_005776	ENSG00000100528	CNIH1	CNIH|CNIH-1|CNIL|TGAM77	cornichon family AMPA receptor auxiliary protein 1	protein-coding
MEIS1_in_B13ko_peak_397	chr11	61362283	61362283	+	6.27477	NA	promoter-TSS (NM_001161454)	promoter-TSS (NM_001161454)	0	NM_001161454	220002	Hs.22546	NM_153611	ENSG00000162144	CYB561A3	CYBASC3|LCYTB	cytochrome b561 family member A3	protein-coding
MEIS1_in_B13ko_peak_1646	chr6	27478861	27478861	+	6.27477	NA	Intergenic	tRNA-Ser-TCY|tRNA|tRNA	-5743	NM_001347832	7738	Hs.158174	NM_007149	ENSG00000096654	ZNF184	kr-ZNF3	zinc finger protein 184	protein-coding
MEIS1_in_B13ko_peak_476	chr12	26126654	26126654	+	6.27024	NA	Intergenic	CpG	-1584	NM_030762	79365	Hs.177841	NM_030762	ENSG00000123095	BHLHE41	BHLHB3|DEC2|SHARP1|hDEC2	basic helix-loop-helix family member e41	protein-coding
MEIS1_in_B13ko_peak_547	chr12	93784672	93784672	+	6.26511	NA	intron (NM_001320100, intron 2 of 2)	intron (NM_001320100, intron 2 of 2)	-46849	NR_110093	101928731	Hs.659971	NR_110092	ENSG00000258274	LOC101928731	-	uncharacterized LOC101928731	ncRNA
MEIS1_in_B13ko_peak_1342	chr3	97764453	97764453	+	6.23054	NA	promoter-TSS (NR_103511)	promoter-TSS (NR_103511)	-68	NR_136597	84100	Hs.373801	NM_032146	ENSG00000113966	ARL6	BBS3|RP55	ADP ribosylation factor like GTPase 6	protein-coding
MEIS1_in_B13ko_peak_1804	chr7	97117542	97117542	+	6.23054	NA	5' UTR (NM_020186, exon 1 of 2)	5' UTR (NM_020186, exon 1 of 2)	949	NM_020186	57001	Hs.592269	NM_020186	ENSG00000196636	SDHAF3	ACN9|DC11|LYRM10|Sdh7	succinate dehydrogenase complex assembly factor 3	protein-coding
MEIS1_in_B13ko_peak_623	chr13	42041315	42041315	+	6.18997	NA	intron (NM_001204504, intron 1 of 29)	CpG	1279	NM_001204504	160851	Hs.630380	NM_152910	ENSG00000102780	DGKH	DGKeta	diacylglycerol kinase eta	protein-coding
MEIS1_in_B13ko_peak_851	chr17	19508232	19508232	+	6.18997	NA	Intergenic	tRNA-Trp-TGG|tRNA|tRNA	-25622	NM_018242	55244	Hs.232054	NM_018242	ENSG00000142494	SLC47A1	MATE1	solute carrier family 47 member 1	protein-coding
MEIS1_in_B13ko_peak_1805	chr7	97872356	97872356	+	6.18997	NA	promoter-TSS (NM_133436)	promoter-TSS (NM_133436)	186	NM_183356	440	Hs.489207	NM_001673	ENSG00000070669	ASNS	ASNSD|TS11	asparagine synthetase (glutamine-hydrolyzing)	protein-coding
MEIS1_in_B13ko_peak_1037	chr19	48170644	48170644	+	6.18997	NA	promoter-TSS (NM_000234)	promoter-TSS (NM_000234)	-41	NM_001289064	3978	Hs.1770	NM_000234	ENSG00000105486	LIG1	-	DNA ligase 1	protein-coding
MEIS1_in_B13ko_peak_962	chr18	77900272	77900272	+	6.18997	NA	Intergenic	(GCGGCGC)n|Simple_repeat|Simple_repeat	93455	NR_104127	101927715	Hs.385670	NR_104127		LINC01029	-	long intergenic non-protein coding RNA 1029	ncRNA
MEIS1_in_B13ko_peak_694	chr14	74612753	74612753	+	6.18997	NA	promoter-TSS (NM_000428)	promoter-TSS (NM_000428)	-422	NM_000428	4053	Hs.512776	NM_000428	ENSG00000119681	LTBP2	C14orf141|GLC3D|LTBP3|MSPKA|MSTP031|WMS3	latent transforming growth factor beta binding protein 2	protein-coding
MEIS1_in_B13ko_peak_1106	chr2	86500547	86500547	+	6.18997	NA	Intergenic	MSTA-int|LTR|ERVL-MaLR	59086	NM_001146688	55818	Hs.557425	NM_018433	ENSG00000115548	KDM3A	JHDM2A|JHMD2A|JMJD1|JMJD1A|TSGA	lysine demethylase 3A	protein-coding
MEIS1_in_B13ko_peak_1624	chr6	26311794	26311794	+	6.18997	NA	Intergenic	tRNA-Gln-CAA|tRNA|tRNA	-26295	NM_003543	8365	Hs.591790	NM_003543	ENSG00000158406	HIST1H4H	H4/h|H4FH	histone cluster 1 H4 family member h	protein-coding
MEIS1_in_B13ko_peak_1256	chr22	21549256	21549256	+	6.18997	NA	promoter-TSS (NM_001256355)	promoter-TSS (NM_001256355)	-191	NM_001256355	7332	Hs.108104	NM_003347	ENSG00000185651	UBE2L3	E2-F1|L-UBC|UBCH7|UbcM4	ubiquitin conjugating enzyme E2 L3	protein-coding
MEIS1_in_B13ko_peak_1404	chr3	158801979	158801979	+	6.18997	NA	promoter-TSS (NM_001167903)	promoter-TSS (NM_001167903)	53	NM_001289407	64747	Hs.58663	NM_022736	ENSG00000118855	MFSD1	SMAP4	major facilitator superfamily domain containing 1	protein-coding
MEIS1_in_B13ko_peak_344	chr10	71946053	71946053	+	6.18997	NA	Intergenic	LTR2|LTR|ERV1	-18309	NM_004273	9469	Hs.158304	NM_004273	ENSG00000122863	CHST3	C6ST|C6ST1|HSD	carbohydrate sulfotransferase 3	protein-coding
MEIS1_in_B13ko_peak_1759	chr7	44573988	44573988	+	6.18997	NA	5' UTR (NM_001257189, exon 1 of 13)	5' UTR (NM_001257189, exon 1 of 13)	550	NM_019082	54606	Hs.654762	NM_019082	ENSG00000136271	DDX56	DDX21|DDX26|NOH61	DEAD-box helicase 56	protein-coding
MEIS1_in_B13ko_peak_1164	chr20	58651188	58651188	+	6.18997	NA	promoter-TSS (NR_037945)	promoter-TSS (NR_037945)	-65	NM_001001433	8675	Hs.307913	NM_003763	ENSG00000124222	STX16	SYN16	syntaxin 16	protein-coding
MEIS1_in_B13ko_peak_966	chr19	550587	550587	+	6.18997	NA	TTS (NM_005317)	TTS (NM_005317)	6553	NM_005317	3004	Hs.465511	NM_005317	ENSG00000197540	GZMM	LMET1|MET1	granzyme M	protein-coding
MEIS1_in_B13ko_peak_457	chr12	6852492	6852492	+	6.18997	NA	promoter-TSS (NM_001331019)	promoter-TSS (NM_001331019)	365	NM_003481	8078	Hs.631661	NM_003481	ENSG00000111667	USP5	ISOT	ubiquitin specific peptidase 5	protein-coding
MEIS1_in_B13ko_peak_1838	chr7	121505742	121505742	+	6.18997	NA	Intergenic	LTR10B2|LTR|ERV1	-109374	NM_001040020	10447	Hs.434053	NM_014888	ENSG00000196937	FAM3C	GS3786|ILEI	family with sequence similarity 3 member C	protein-coding
MEIS1_in_B13ko_peak_428	chr11	93661509	93661509	+	6.1732	NA	promoter-TSS (NM_033395)	promoter-TSS (NM_033395)	-141	NM_033395	85459	Hs.458418	NM_033395	ENSG00000166004	CEP295	KIAA1731	centrosomal protein 295	protein-coding
MEIS1_in_B13ko_peak_879	chr17	43278740	43278740	+	6.15019	NA	promoter-TSS (NR_002716).4	promoter-TSS (NR_002716).4	-572	NR_002716	6066		NR_002716	ENSG00000274585	RNU2-1	RNU2|U2	RNA, U2 small nuclear 1	snRNA
MEIS1_in_B13ko_peak_639	chr13	80882298	80882298	+	6.15019	NA	Intergenic	Intergenic	-136093	NR_125770	103724386	Hs.539622	NR_125770		LINC00377	TCONS_00021861	long intergenic non-protein coding RNA 377	ncRNA
MEIS1_in_B13ko_peak_300	chr1	239387013	239387013	+	6.14534	NA	promoter-TSS (NM_001347716)	promoter-TSS (NM_001347716)	83	NM_001347716	1131	Hs.7138	NM_000740	ENSG00000133019	CHRM3	EGBRS|HM3|PBS	cholinergic receptor muscarinic 3	protein-coding
MEIS1_in_B13ko_peak_1140	chr2	231926733	231926733	+	6.13041	NA	promoter-TSS (NM_024409)	promoter-TSS (NM_024409)	-330	NM_024409	4880	Hs.247916	NM_024409	ENSG00000163273	NPPC	CNP|CNP2	natriuretic peptide C	protein-coding
MEIS1_in_B13ko_peak_1591	chr5	177402530	177402530	+	6.11104	NA	intron (NM_000505, intron 13 of 13)	CpG	-1894	NM_001029886	345456	Hs.130196	NM_001029886	ENSG00000196570	PFN3	-	profilin 3	protein-coding
MEIS1_in_B13ko_peak_281	chr1	228458220	228458220	+	6.07591	NA	promoter-TSS (NM_033445)	promoter-TSS (NM_033445)	113	NM_175055	128312	Hs.376691	NM_175055	ENSG00000196890	HIST3H2BB	H2Bb	histone cluster 3 H2B family member b	protein-coding
MEIS1_in_B13ko_peak_145	chr1	150282050	150282050	+	6.07591	NA	promoter-TSS (NM_001300838)	promoter-TSS (NM_001300838)	-483	NM_001300840	148523	Hs.54680	NM_144697	ENSG00000159208	CIART	C1orf51|CHRONO|GM129	circadian associated repressor of transcription	protein-coding
MEIS1_in_B13ko_peak_280	chr1	228457652	228457652	+	6.07591	NA	promoter-TSS (NM_175055)	promoter-TSS (NM_175055)	207	NM_033445	92815	Hs.26331	NM_033445	ENSG00000181218	HIST3H2A	-	histone cluster 3 H2A	protein-coding
MEIS1_in_B13ko_peak_1801	chr7	92528623	92528623	+	6.06562	NA	promoter-TSS (NM_000466)	promoter-TSS (NM_000466)	-92	NM_001282678	5189	Hs.164682	NM_000466	ENSG00000127980	PEX1	HMLR1|PBD1A|PBD1B|ZWS|ZWS1	peroxisomal biogenesis factor 1	protein-coding
MEIS1_in_B13ko_peak_2008	chrUn_GL000214v1	129556	129556	+	6.06088	NA	NA	Intergenic	NA	NA
MEIS1_in_B13ko_peak_815	chr16	88668347	88668347	+	6.05693	NA	intron (NR_024402, intron 1 of 3)	intron (NR_024402, intron 1 of 3)	4974	NR_024399	197187	Hs.499548	NM_144986	ENSG00000260630	SNAI3-AS1	-	SNAI3 antisense RNA 1	ncRNA
MEIS1_in_B13ko_peak_1965	chr9	89606224	89606224	+	6.05693	NA	3' UTR (NM_006705, exon 4 of 4)	3' UTR (NM_006705, exon 4 of 4)	1212	NM_006705	10912	Hs.9701	NM_006705	ENSG00000130222	GADD45G	CR6|DDIT2|GADD45gamma|GRP17	growth arrest and DNA damage inducible gamma	protein-coding
MEIS1_in_B13ko_peak_834	chr17	8173502	8173502	+	6.05693	NA	promoter-TSS (NR_033294)	promoter-TSS (NR_033294)	86	NR_033294	727676		NR_033294	ENSG00000200463	SNORD118	LCC|U8	small nucleolar RNA, C/D box 118	snoRNA
MEIS1_in_B13ko_peak_654	chr14	19055131	19055131	+	6.05693	NA	Intergenic	Intergenic	-7241	NR_110526	503639	Hs.659013	NM_001013701		DUXAP10	-	double homeobox A pseudogene 10	pseudo
MEIS1_in_B13ko_peak_1024	chr19	43827181	43827181	+	6.05693	NA	promoter-TSS (NM_001297752)	promoter-TSS (NM_001297752)	-111	NM_001297752	284349	Hs.652513	NM_181845	ENSG00000167637	ZNF283	HZF19|HZF41	zinc finger protein 283	protein-coding
MEIS1_in_B13ko_peak_602	chr12	132243194	132243194	+	6.05693	NA	intron (NM_001122636, intron 6 of 10)	intron (NM_001122636, intron 6 of 10)	-32197	NR_024563	100130238	Hs.536338	NR_024563		LOC100130238	-	uncharacterized LOC100130238	ncRNA
MEIS1_in_B13ko_peak_1072	chr2	3180647	3180647	+	6.05693	NA	Intergenic	CpG	-54621	NR_110228	101927554	Hs.638446	NR_110228	ENSG00000234423	LINC01250	-	long intergenic non-protein coding RNA 1250	ncRNA
MEIS1_in_B13ko_peak_986	chr19	7083142	7083142	+	6.05693	NA	exon (NM_001044387, exon 8 of 8)	exon (NM_001044387, exon 8 of 8)	13682	NM_001044387	79230	Hs.591380	NM_024341	ENSG00000130544	ZNF557	-	zinc finger protein 557	protein-coding
MEIS1_in_B13ko_peak_1861	chr7	149065946	149065946	+	6.05693	NA	Intergenic	CpG	24831	NM_152411	136051	Hs.729572	NM_152411	ENSG00000197362	ZNF786	-	zinc finger protein 786	protein-coding
MEIS1_in_B13ko_peak_662	chr14	20683282	20683282	+	6.05693	NA	promoter-TSS (NM_001282192)	promoter-TSS (NM_001282192)	-895	NM_001145	283	Hs.283749	NM_001145	ENSG00000214274	ANG	ALS9|HEL168|RAA1|RNASE4|RNASE5	angiogenin	protein-coding
MEIS1_in_B13ko_peak_886	chr17	44656261	44656261	+	6.05693	NA	promoter-TSS (NM_001145080)	promoter-TSS (NM_001145080)	-133	NM_001145080	284071	Hs.349758	NM_001033659	ENSG00000180336	MEIOC	C17orf104	meiosis specific with coiled-coil domain	protein-coding
MEIS1_in_B13ko_peak_588	chr12	122896170	122896170	+	6.05693	NA	promoter-TSS (NM_024667)	promoter-TSS (NM_024667)	-5	NM_024667	79720	Hs.507162	NM_024667	ENSG00000139722	VPS37B	-	VPS37B, ESCRT-I subunit	protein-coding
MEIS1_in_B13ko_peak_1332	chr3	75737951	75737951	+	5.98613	NA	promoter-TSS (NR_036235)	promoter-TSS (NR_036235)	-329	NR_036235	100422955		NR_036235	ENSG00000266396	MIR4273	-	microRNA 4273	ncRNA
MEIS1_in_B13ko_peak_177	chr1	156813978	156813978	+	5.98613	NA	exon (NM_001161443, exon 4 of 8)	exon (NM_001161443, exon 4 of 8)	-1772	NM_001007792	4914	Hs.406293	NM_002529	ENSG00000198400	NTRK1	MTC|TRK|TRK1|TRKA|Trk-A|p140-TrkA	neurotrophic receptor tyrosine kinase 1	protein-coding
MEIS1_in_B13ko_peak_1755	chr7	40134968	40134968	+	5.98613	NA	promoter-TSS (NM_138701)	promoter-TSS (NM_138701)	-8	NM_001193313	79783	Hs.586313	NM_024728	ENSG00000175600	SUGCT	C7orf10|DERP13|GA3|ORF19	succinyl-CoA:glutarate-CoA transferase	protein-coding
MEIS1_in_B13ko_peak_1110	chr2	90381811	90381811	+	5.97312	NA	Intergenic	Intergenic	-743904	NR_136329	101927050	Hs.578075	NR_136329		LOC101927050	-	lysine methyltransferase 2C pseudogene	pseudo
MEIS1_in_B13ko_peak_932	chr18	6729390	6729390	+	5.93895	NA	intron (NR_134645, intron 1 of 1)	(AC)n|Simple_repeat|Simple_repeat	472	NR_134645	101927168	Hs.242240	NR_134645		LOC101927168	-	uncharacterized LOC101927168	ncRNA
MEIS1_in_B13ko_peak_295	chr1	235367382	235367382	+	5.93895	NA	promoter-TSS (NM_001287801)	promoter-TSS (NM_001287801)	22	NM_001079515	6905	Hs.744998	NM_003193	ENSG00000284770	TBCE	HRD|KCS|KCS1|PEAMO|pac2	tubulin folding cofactor E	protein-coding
MEIS1_in_B13ko_peak_1192	chr21	8245287	8245287	+	5.9379	NA	intron (NR_003287, intron 1 of 2)	intron (NR_003287, intron 1 of 2)	-4218	NR_128715	103504727		NR_128715	ENSG00000274060	MIR6724-2	hsa-mir-6724-2	microRNA 6724-2	ncRNA
MEIS1_in_B13ko_peak_2031	chrUn_KI270589v1	43354	43354	+	5.92767	NA	NA	(CATTC)n|Satellite|Satellite	NA	NA
MEIS1_in_B13ko_peak_2033	chrUn_KI270744v1	13303	13303	+	5.92767	NA	NA	Intergenic	NA	NA
MEIS1_in_B13ko_peak_1212	chr21	8469647	8469647	+	5.92361	NA	Intergenic	Intergenic	28501	NR_003287	100008589		NR_003287		RNA28SN5	RN28S1|RNA28S5	RNA, 28S ribosomal N5	rRNA
MEIS1_in_B13ko_peak_1243	chr22	11814199	11814199	+	5.8965	NA	Intergenic	Intergenic	-83207	NR_110761	102723769	Hs.652926	NR_110761		LOC102723769	-	uncharacterized LOC102723769	ncRNA
MEIS1_in_B13ko_peak_192	chr1	161462094	161462094	+	5.89397	NA	Intergenic	CpG	-43321	NM_021642	2212	Hs.352642	NM_021642	ENSG00000143226	FCGR2A	CD32|CD32A|CDw32|FCG2|FCGR2|FCGR2A1|FcGR|IGFR2	Fc fragment of IgG receptor IIa	protein-coding
MEIS1_in_B13ko_peak_827	chr17	7915980	7915980	+	5.86668	NA	promoter-TSS (NR_024349)	promoter-TSS (NR_024349)	-33	NR_024349
MEIS1_in_B13ko_peak_814	chr16	88488384	88488384	+	5.85914	NA	intron (NM_153813, intron 2 of 9)	CpG	19466	NR_049821	100847057		NR_049821	ENSG00000263456	MIR5189	mir-5189	microRNA 5189	ncRNA
MEIS1_in_B13ko_peak_512	chr12	56224310	56224310	+	5.85914	NA	promoter-TSS (NM_024068)	promoter-TSS (NM_024068)	-31	NM_024068	79035	Hs.240170	NM_024068	ENSG00000139579	NABP2	OBFC2B|SOSS-B1|SSB1|hSSB1	nucleic acid binding protein 2	protein-coding
MEIS1_in_B13ko_peak_809	chr16	80837801	80837801	+	5.85914	NA	intron (NR_131948, intron 2 of 2)	intron (NR_131948, intron 2 of 2)	-33523	NM_152342	124359	Hs.60257	NM_152342	ENSG00000166446	CDYL2	PCCP1	chromodomain Y like 2	protein-coding
MEIS1_in_B13ko_peak_1848	chr7	130486201	130486201	+	5.85335	NA	promoter-TSS (NM_177524)	promoter-TSS (NM_177524)	26	NM_001253901	4232	Hs.270978	NM_002402	ENSG00000106484	MEST	PEG1	mesoderm specific transcript	protein-coding
MEIS1_in_B13ko_peak_1768	chr7	56448522	56448522	+	5.829	NA	promoter-TSS (NR_029420)	promoter-TSS (NR_029420)	-147	NR_029420	650226	Hs.448401	NR_029420		LOC650226	-	ankyrin repeat domain 26 pseudogene	pseudo
MEIS1_in_B13ko_peak_1539	chr5	48403202	48403202	+	5.81213	NA	Intergenic	ALR/Alpha|Satellite|centr	2038198	NM_198449	133418	Hs.561411	NM_198449	ENSG00000170571	EMB	GP70	embigin	protein-coding
MEIS1_in_B13ko_peak_169	chr1	156282930	156282930	+	5.81213	NA	promoter-TSS (NR_026678)	promoter-TSS (NR_026678)	17	NR_026678	84283	Hs.347408	NM_032323	ENSG00000163472	TMEM79	MATT	transmembrane protein 79	protein-coding
MEIS1_in_B13ko_peak_1449	chr4	1046651	1046651	+	5.80151	NA	Intergenic	Intergenic	34187	NM_021923	53834	Hs.193326	NM_021923	ENSG00000127418	FGFRL1	FGFR5|FHFR	fibroblast growth factor receptor like 1	protein-coding
MEIS1_in_B13ko_peak_1877	chr7	158148344	158148344	+	5.80131	NA	intron (NM_130843, intron 6 of 21)	intron (NM_130843, intron 6 of 21)	293759	NR_038966	100506585	Hs.661265	NR_038966	ENSG00000233038	LOC100506585	-	uncharacterized LOC100506585	ncRNA
MEIS1_in_B13ko_peak_278	chr1	228059386	228059386	+	5.7912	NA	exon (NM_033131, exon 4 of 4)	exon (NM_033131, exon 4 of 4)	-23274	NM_001658	375	Hs.286221	NM_001658	ENSG00000143761	ARF1	-	ADP ribosylation factor 1	protein-coding
MEIS1_in_B13ko_peak_1723	chr7	1176257	1176257	+	5.7912	NA	Intergenic	ERV3-16A3_I-int|LTR|ERVL	15472	NR_110070	101927021	Hs.529566	NR_110065		LOC101927021	-	uncharacterized LOC101927021	ncRNA
MEIS1_in_B13ko_peak_901	chr17	63848889	63848889	+	5.7912	NA	Intergenic	(CCAG)n|Simple_repeat|Simple_repeat	-5898	NM_001098426	6603	Hs.250581	NM_003077	ENSG00000108604	SMARCD2	BAF60B|CRACD2|PRO2451|Rsc6p|SGD2	SWI/SNF related, matrix associated, actin dependent regulator of chromatin, subfamily d, member 2	protein-coding
MEIS1_in_B13ko_peak_1369	chr3	128680846	128680846	+	5.7912	NA	Intergenic	CpG	-29970	NM_002950	6184	Hs.518244	NM_002950	ENSG00000163902	RPN1	OST1|RBPH1	ribophorin I	protein-coding
MEIS1_in_B13ko_peak_1958	chr9	63859711	63859711	+	5.7912	NA	promoter-TSS (NR_033907)	promoter-TSS (NR_033907)	-77	NR_033907	642236	Hs.650100	NR_033907		FRG1JP	-	FSHD region gene 1 family member J, pseudogene	pseudo
MEIS1_in_B13ko_peak_1542	chr5	49227008	49227008	+	5.7912	NA	Intergenic	ALR/Alpha|Satellite|centr	1214392	NM_198449	133418	Hs.561411	NM_198449	ENSG00000170571	EMB	GP70	embigin	protein-coding
MEIS1_in_B13ko_peak_1351	chr3	113019835	113019835	+	5.7912	NA	promoter-TSS (NM_001319115)	promoter-TSS (NM_001319115)	-102	NR_134969	25871	Hs.591288	NM_015412	ENSG00000163608	NEPRO	C3orf17|NET17	nucleolus and neural progenitor protein	protein-coding
MEIS1_in_B13ko_peak_446	chr12	949836	949836	+	5.7912	NA	promoter-TSS (NM_001297421)	promoter-TSS (NM_001297421)	-114	NR_123713	5893	Hs.410355	NM_134422	ENSG00000002016	RAD52	-	RAD52 homolog, DNA repair protein	protein-coding
MEIS1_in_B13ko_peak_871	chr17	43241922	43241922	+	5.7912	NA	promoter-TSS (NR_002716).7	promoter-TSS (NR_002716).7	-552	NR_002716	6066		NR_002716	ENSG00000274585	RNU2-1	RNU2|U2	RNA, U2 small nuclear 1	snRNA
MEIS1_in_B13ko_peak_260	chr1	207751960	207751960	+	5.7912	NA	promoter-TSS (NM_172361)	promoter-TSS (NM_172361)	-78	NM_172361	4179	Hs.510402	NM_002389	ENSG00000117335	CD46	AHUS2|MCP|MIC10|TLX|TRA2.10	CD46 molecule	protein-coding
MEIS1_in_B13ko_peak_1472	chr4	49329699	49329699	+	5.7912	NA	Intergenic	ACRO1|Satellite|acro	343057	NM_001286791	80157	Hs.479703	NM_025087	ENSG00000109182	CWH43	CWH43-C|PGAP2IP	cell wall biogenesis 43 C-terminal homolog	protein-coding
MEIS1_in_B13ko_peak_1420	chr3	181851400	181851400	+	5.7912	NA	Intergenic	Intergenic	-100964	NR_104146	100996490	Hs.606987	NR_104146	ENSG00000242512	LINC01206	-	long intergenic non-protein coding RNA 1206	ncRNA
MEIS1_in_B13ko_peak_1403	chr3	157175036	157175036	+	5.7829	NA	Intergenic	CpG	-14276	NM_001308185	57018	Hs.4859	NM_020307	ENSG00000163660	CCNL1	ANIA6A|BM-001|PRO1073|ania-6a	cyclin L1	protein-coding
MEIS1_in_B13ko_peak_558	chr12	102120109	102120109	+	5.7829	NA	promoter-TSS (NM_001319993)	promoter-TSS (NM_001319993)	22	NM_024057	79023	Hs.444276	NM_024057	ENSG00000075188	NUP37	p37	nucleoporin 37	protein-coding
MEIS1_in_B13ko_peak_472	chr12	20551473	20551473	+	5.77686	NA	intron (NM_000921, intron 1 of 15)	SSU-rRNA_Hsa|rRNA|rRNA	-20391	NM_001244683	5139	Hs.386791	NM_000921	ENSG00000172572	PDE3A	CGI-PDE|CGI-PDE A|CGI-PDE-A|HTNB	phosphodiesterase 3A	protein-coding
MEIS1_in_B13ko_peak_2022	chrUn_GL000220v1	142029	142029	+	5.77271	NA	Intergenic	Intergenic	-6675	NR_128717	103504733		NR_128717	ENSG00000275692	MIR6724-4	hsa-mir-6724-4	microRNA 6724-4	ncRNA
MEIS1_in_B13ko_peak_335	chr10	46786706	46786706	+	5.74113	NA	promoter-TSS (NR_111968)	promoter-TSS (NR_111968)	-27	NR_003611	399761	Hs.711898	NM_001040053	ENSG00000204177	BMS1P1	BMS1LP1|BMS1LP5|BMS1P5	BMS1, ribosome biogenesis factor pseudogene 1	pseudo
MEIS1_in_B13ko_peak_1353	chr3	119498409	119498409	+	5.74113	NA	promoter-TSS (NM_016589)	promoter-TSS (NM_016589)	-112	NM_016589	51300	Hs.477287	NM_016589	ENSG00000113845	TIMMDC1	C3orf1	translocase of inner mitochondrial membrane domain containing 1	protein-coding
MEIS1_in_B13ko_peak_253	chr1	204516515	204516515	+	5.68808	NA	intron (NM_001278516, intron 1 of 9)	CpG	136	NM_002393	4194	Hs.497492	NM_002393	ENSG00000198625	MDM4	HDMX|MDMX|MRP1	MDM4, p53 regulator	protein-coding
MEIS1_in_B13ko_peak_1208	chr21	8456983	8456983	+	5.67791	NA	Intergenic	HERVIP10FH-int|LTR|ERV1	15837	NR_003287	100008589		NR_003287		RNA28SN5	RN28S1|RNA28S5	RNA, 28S ribosomal N5	rRNA
MEIS1_in_B13ko_peak_927	chr17_KI270730v1_random	108958	108958	+	5.65912	NA	NA	(TGGAA)n|Simple_repeat|Simple_repeat	NA	NA
MEIS1_in_B13ko_peak_1787	chr7	76305348	76305348	+	5.65042	NA	Intergenic	Intergenic	2790	NM_001540	3315	Hs.520973	NM_001540	ENSG00000106211	HSPB1	CMT2F|HEL-S-102|HMN2B|HS.76067|HSP27|HSP28|Hsp25|SRP27	heat shock protein family B (small) member 1	protein-coding
MEIS1_in_B13ko_peak_2028	chrUn_GL000224v1	18291	18291	+	5.63805	NA	Intergenic	ACRO1|Satellite|acro	-84212	NR_135481	100505874	Hs.559790	NR_135481		LOC100505874	-	uncharacterized LOC100505874	ncRNA
MEIS1_in_B13ko_peak_2029	chrUn_GL000224v1	18557	18557	+	5.63304	NA	Intergenic	ACRO1|Satellite|acro	-83946	NR_135481	100505874	Hs.559790	NR_135481		LOC100505874	-	uncharacterized LOC100505874	ncRNA
MEIS1_in_B13ko_peak_1523	chr5	17597396	17597396	+	5.61994	NA	Intergenic	Intergenic	153386	NR_134270	102723526		NR_134270	ENSG00000249662	LINC02218	-	long intergenic non-protein coding RNA 2218	ncRNA
MEIS1_in_B13ko_peak_486	chr12	35072936	35072936	+	5.60529	NA	Intergenic	ALR/Alpha|Satellite|centr	1050655	NM_032834	84920	Hs.102971	NM_032834	ENSG00000139133	ALG10	ALG10A|DIE2|KCR1	ALG10, alpha-1,2-glucosyltransferase	protein-coding
MEIS1_in_B13ko_peak_1121	chr2	176080623	176080623	+	5.60529	NA	exon (NM_001080458, exon 3 of 3)	exon (NM_001080458, exon 3 of 3)	3339	NM_001080458	344191	Hs.452341	NM_001080458	ENSG00000174279	EVX2	EVX-2	even-skipped homeobox 2	protein-coding
MEIS1_in_B13ko_peak_1152	chr20	29445565	29445565	+	5.54639	NA	Intergenic	Intergenic	-2952	NR_134504	105379477	Hs.702270	NR_134504		LOC105379477	-	uncharacterized LOC105379477	ncRNA
MEIS1_in_B13ko_peak_1489	chr4	98846165	98846165	+	5.53567	NA	Intergenic	MER41-int|LTR|ERV1	82927	NM_001130678	1977	Hs.13211	NM_001968	ENSG00000151247	EIF4E	AUTS19|CBP|EIF4E1|EIF4EL1|EIF4F|eIF-4E	eukaryotic translation initiation factor 4E	protein-coding
MEIS1_in_B13ko_peak_33	chr1	26692432	26692432	+	5.52107	NA	non-coding (NR_135804, exon 1 of 1)	non-coding (NR_135804, exon 1 of 1)	1699	NR_135804	101928728	Hs.128770	NR_135804	ENSG00000260063	LOC101928728	-	uncharacterized LOC101928728	ncRNA
MEIS1_in_B13ko_peak_632	chr13	63010059	63010059	+	5.5197	NA	Intergenic	MSTA-int|LTR|ERVL-MaLR	-202700	NR_120403	100874176	Hs.402083	NR_047029		LINC00448	-	long intergenic non-protein coding RNA 448	ncRNA
MEIS1_in_B13ko_peak_360	chr10	120851313	120851313	+	5.50992	NA	promoter-TSS (NR_033850)	promoter-TSS (NR_033850)	-134	NR_033850	283089	Hs.568750	NR_033850	ENSG00000227165	WDR11-AS1	-	WDR11 antisense RNA 1	ncRNA
MEIS1_in_B13ko_peak_1052	chr19	50851014	50851014	+	5.50992	NA	non-coding (NR_131205, exon 3 of 3)	non-coding (NR_131205, exon 3 of 3)	-3901	NM_001030047	354	Hs.171995	NM_001648	ENSG00000142515	KLK3	APS|KLK2A1|PSA|hK3	kallikrein related peptidase 3	protein-coding
MEIS1_in_B13ko_peak_447	chr12	1085398	1085398	+	5.50992	NA	intron (NM_178039, intron 3 of 17)	intron (NM_178039, intron 3 of 17)	57650	NM_001301248	23085	Hs.601216	NM_178039	ENSG00000082805	ERC1	Cast2|ELKS|ERC-1|RAB6IP2	ELKS/RAB6-interacting/CAST family member 1	protein-coding
MEIS1_in_B13ko_peak_801	chr16	58129676	58129676	+	5.50992	NA	promoter-TSS (NR_136632)	promoter-TSS (NR_136632)	-251	NR_136632	29105	Hs.532755	NM_013242	ENSG00000070761	CFAP20	BUG22|C16orf80|EVORF|GTL3|fSAP23	cilia and flagella associated protein 20	protein-coding
MEIS1_in_B13ko_peak_1541	chr5	49112598	49112598	+	5.50992	NA	Intergenic	ALR/Alpha|Satellite|centr	1328802	NM_198449	133418	Hs.561411	NM_198449	ENSG00000170571	EMB	GP70	embigin	protein-coding
MEIS1_in_B13ko_peak_345	chr10	75022363	75022363	+	5.50992	NA	intron (NM_012330, intron 16 of 17)	intron (NM_012330, intron 16 of 17)	36151	NM_001003892	338599	Hs.535090	NM_001003892	ENSG00000188716	DUPD1	DUSP27|FMDSP	dual specificity phosphatase and pro isomerase domain containing 1	protein-coding
MEIS1_in_B13ko_peak_1991	chr9	134164525	134164525	+	5.50992	NA	promoter-TSS (NR_023344)	promoter-TSS (NR_023344)	39	NR_023344	100151684	Hs.545589	NR_023344	ENSG00000221676	RNU6ATAC	RNU6ATAC1|U6ATAC	RNA, U6atac small nuclear (U12-dependent splicing)	snRNA
MEIS1_in_B13ko_peak_1267	chr22	42324056	42324056	+	5.50992	NA	Intergenic	Intergenic	-40129	NM_005650	6942	Hs.475018	NM_005650	ENSG00000100207	TCF20	AR1|SPBP|TCF-20	transcription factor 20	protein-coding
MEIS1_in_B13ko_peak_843	chr17	10846867	10846867	+	5.50992	NA	Intergenic	(GTGGTG)n|Simple_repeat|Simple_repeat	-8766	NM_001101387	644139	Hs.553909	NM_001101387	ENSG00000233670	PIRT	-	phosphoinositide interacting regulator of transient receptor potential channels	protein-coding
MEIS1_in_B13ko_peak_1041	chr19	49388276	49388276	+	5.50992	NA	promoter-TSS (NR_110729)	promoter-TSS (NR_110729)	58	NM_144688	147872	Hs.662085	NM_144688	ENSG00000161609	CCDC155	KASH5	coiled-coil domain containing 155	protein-coding
MEIS1_in_B13ko_peak_983	chr19	5680616	5680616	+	5.50992	NA	promoter-TSS (NM_001267868)	promoter-TSS (NM_001267868)	-149	NM_198704	374875	Hs.631840	NM_198533	ENSG00000167733	HSD11B1L	11-DH3|11-beta-HSD3|HSD3|SCDR10|SCDR10B|SDR26C2	hydroxysteroid 11-beta dehydrogenase 1 like	protein-coding
MEIS1_in_B13ko_peak_1134	chr2	218396339	218396339	+	5.50992	NA	3' UTR (NM_000578, exon 15 of 15)	3' UTR (NM_000578, exon 15 of 15)	-1999	NM_001206878	58190	Hs.444468	NM_021198	ENSG00000144579	CTDSP1	NIF3|NLI-IF|NLIIF|SCP1	CTD small phosphatase 1	protein-coding
MEIS1_in_B13ko_peak_1817	chr7	100450660	100450660	+	5.50992	NA	Intergenic	Intergenic	13611	NM_001004323	402573	Hs.632306	NM_001004323	ENSG00000185955	C7orf61	-	chromosome 7 open reading frame 61	protein-coding
MEIS1_in_B13ko_peak_1181	chr21	7658458	7658458	+	5.50992	NA	Intergenic	Intergenic	33743	NM_001322975	102723360	Hs.743984	NM_001322975		LOC102723360	-	uncharacterized LOC102723360	protein-coding
MEIS1_in_B13ko_peak_1170	chr20	64287186	64287186	+	5.50992	NA	Intergenic	(AGGGTT)n|Simple_repeat|Simple_repeat	-3199	NR_040415	140849	Hs.745565	NR_040415		LINC00266-1	C20orf69|NCRNA00266|NCRNA00266-1|bA476I15.3	long intergenic non-protein coding RNA 266-1	ncRNA
MEIS1_in_B13ko_peak_353	chr10	97736926	97736926	+	5.50992	NA	promoter-TSS (NM_001174122)	promoter-TSS (NM_001174122)	-195	NM_001174122	118813	Hs.744075	NM_144588	ENSG00000155256	ZFYVE27	PROTRUDIN|SPG33	zinc finger FYVE-type containing 27	protein-coding
MEIS1_in_B13ko_peak_919	chr17	81727594	81727594	+	5.50992	NA	Intergenic	MLT1K|LTR|ERVL-MaLR	15358	NM_001270888	1468	Hs.548187	NM_012140	ENSG00000183048	SLC25A10	DIC	solute carrier family 25 member 10	protein-coding
MEIS1_in_B13ko_peak_1440	chr3	197459694	197459694	+	5.50992	NA	Intergenic	Intergenic	96293	NM_004051	622	Hs.274539	NM_004051	ENSG00000161267	BDH1	BDH|SDR9C1	3-hydroxybutyrate dehydrogenase 1	protein-coding
MEIS1_in_B13ko_peak_618	chr13	30674008	30674008	+	5.50992	NA	Intergenic	tRNA-Asn-AAC|tRNA|tRNA	-39470	NM_001204406	241	Hs.507658	NM_001629	ENSG00000132965	ALOX5AP	FLAP	arachidonate 5-lipoxygenase activating protein	protein-coding
MEIS1_in_B13ko_peak_1893	chr8	41828489	41828489	+	5.50992	NA	intron (NM_001142446, intron 1 of 42)	CpG	-30867	NM_020476	286	Hs.654438	NM_000037	ENSG00000029534	ANK1	ANK|SPH1|SPH2	ankyrin 1	protein-coding
MEIS1_in_B13ko_peak_1976	chr9	113410631	113410631	+	5.50992	NA	promoter-TSS (NR_027261)	promoter-TSS (NR_027261)	-13	NM_001278629	257169	Hs.632691	NM_152786	ENSG00000157653	C9orf43	-	chromosome 9 open reading frame 43	protein-coding
MEIS1_in_B13ko_peak_47	chr1	35032003	35032003	+	5.50992	NA	promoter-TSS (NM_007167)	promoter-TSS (NM_007167)	-35	NM_007167	9204	Hs.533986	NM_007167	ENSG00000163867	ZMYM6	Buster2|MYM|ZBED7|ZNF198L4|ZNF258	zinc finger MYM-type containing 6	protein-coding
MEIS1_in_B13ko_peak_739	chr15	68054041	68054041	+	5.50992	NA	promoter-TSS (NM_016166)	promoter-TSS (NM_016166)	-138	NM_016166	8554	Hs.162458	NM_016166	ENSG00000033800	PIAS1	DDXBP1|GBP|GU/RH-II|ZMIZ3	protein inhibitor of activated STAT 1	protein-coding
MEIS1_in_B13ko_peak_1297	chr2_KI270767v1_alt	46398	46398	+	5.50992	NA	intron (NR_110220, intron 1 of 1)	CpG	37020	NR_110592	102723927	Hs.733585	NR_110592	ENSG00000237940	LINC01238	-	long intergenic non-protein coding RNA 1238	ncRNA
MEIS1_in_B13ko_peak_1087	chr2	29245327	29245327	+	5.50992	NA	intron (NM_004304, intron 12 of 28)	intron (NM_004304, intron 12 of 28)	129901	NM_024692	79745	Hs.122927	NM_024692	ENSG00000115295	CLIP4	RSNL2	CAP-Gly domain containing linker protein family member 4	protein-coding
MEIS1_in_B13ko_peak_788	chr16	22298542	22298542	+	5.50992	NA	intron (NM_001258035, intron 1 of 19)	MIR|SINE|MIR	1167	NM_001258033	55718	Hs.460298	NM_018119	ENSG00000058600	POLR3E	RPC5|SIN	RNA polymerase III subunit E	protein-coding
MEIS1_in_B13ko_peak_416	chr11	69654627	69654627	+	5.50992	NA	TTS (NM_053056)	TTS (NM_053056)	13522	NM_053056	595	Hs.523852	NM_053056	ENSG00000110092	CCND1	BCL1|D11S287E|PRAD1|U21B31	cyclin D1	protein-coding
MEIS1_in_B13ko_peak_1798	chr7	90464433	90464433	+	5.50992	NA	Intergenic	THE1C-int|LTR|ERVL-MaLR	61099	NM_001185072	9069	Hs.731917	NM_012129	ENSG00000157224	CLDN12	-	claudin 12	protein-coding
MEIS1_in_B13ko_peak_1488	chr4	98665164	98665164	+	5.50992	NA	Intergenic	LTR18A|LTR|ERVL	-6503	NM_005723	10098	Hs.118118	NM_005723	ENSG00000168785	TSPAN5	NET-4|NET4|TM4SF9|TSPAN-5	tetraspanin 5	protein-coding
MEIS1_in_B13ko_peak_167	chr1	155308630	155308630	+	5.50992	NA	promoter-TSS (NM_001135822)	promoter-TSS (NM_001135822)	-118	NM_001242824	2224	Hs.335918	NM_002004	ENSG00000160752	FDPS	FPPS|FPS|POROK9	farnesyl diphosphate synthase	protein-coding
MEIS1_in_B13ko_peak_1996	chr9	136756253	136756253	+	5.50992	NA	intron (NM_001345934, intron 3 of 6)	intron (NM_001345934, intron 3 of 6)	2026	NM_178469	138307	Hs.323991	NM_178469	ENSG00000204001	LCN8	EP17|LCN5	lipocalin 8	protein-coding
MEIS1_in_B13ko_peak_12	chr1	9436415	9436415	+	5.50992	NA	Intergenic	Intergenic	-7419	NR_104622	100506022	Hs.131775	NR_104622	ENSG00000284693	LOC100506022	-	uncharacterized LOC100506022	ncRNA
MEIS1_in_B13ko_peak_433	chr11	113773824	113773824	+	5.50992	NA	promoter-TSS (NM_004724)	promoter-TSS (NM_004724)	-61	NM_004724	9183	Hs.503886	NM_004724	ENSG00000086827	ZW10	HZW10|KNTC1AP	zw10 kinetochore protein	protein-coding
MEIS1_in_B13ko_peak_394	chr11	59556530	59556530	+	5.50992	NA	Intergenic	Intergenic	38628	NR_036120	100422880		NR_036120	ENSG00000264559	MIR3162	mir-3162	microRNA 3162	ncRNA
MEIS1_in_B13ko_peak_678	chr14	49688324	49688324	+	5.50992	NA	promoter-TSS (NM_001197330)	promoter-TSS (NM_001197330)	56	NM_001197330	5427	Hs.162777	NM_002692	ENSG00000100479	POLE2	DPE2	DNA polymerase epsilon 2, accessory subunit	protein-coding
MEIS1_in_B13ko_peak_767	chr16	2830083	2830083	+	5.50992	NA	promoter-TSS (NM_145252)	promoter-TSS (NM_145252)	-89	NM_145252	124220	Hs.105887	NM_145252	ENSG00000162078	ZG16B	EECP|HRPE773|JCLN2|PAUF|PRO1567	zymogen granule protein 16B	protein-coding
MEIS1_in_B13ko_peak_17	chr1	11909787	11909787	+	5.50992	NA	Intergenic	Intergenic	1633	NR_002754	26829		NR_002754	ENSG00000199347	RNU5E-1	RNU5E|U5E	RNA, U5E small nuclear 1	snRNA
MEIS1_in_B13ko_peak_1291	chr22_KI270733v1_random	154321	154321	+	5.50992	NA	Intergenic	(TCTC)n|Simple_repeat|Simple_repeat	-15894	NR_037458
MEIS1_in_B13ko_peak_1059	chr19	58380828	58380828	+	5.50992	NA	intron (NR_049780, intron 1 of 2)	CpG	194	NR_049780	116412	Hs.222236	NM_138466	ENSG00000152475	ZNF837	-	zinc finger protein 837	protein-coding
MEIS1_in_B13ko_peak_892	chr17	50935527	50935527	+	5.50992	NA	Intergenic	Intergenic	-67549	NM_001243877	10140	Hs.703321	NM_005749	ENSG00000141232	TOB1	APRO5|APRO6|PIG49|TOB|TROB|TROB1	transducer of ERBB2, 1	protein-coding
MEIS1_in_B13ko_peak_1924	chr8	123396717	123396717	+	5.50992	NA	promoter-TSS (NM_014109)	promoter-TSS (NM_014109)	-252	NM_014109	29028	Hs.370834	NM_014109	ENSG00000156802	ATAD2	ANCCA|CT137|PRO2000	ATPase family, AAA domain containing 2	protein-coding
MEIS1_in_B13ko_peak_647	chr13	110706672	110706672	+	5.50992	NA	promoter-TSS (NM_024537)	promoter-TSS (NM_024537)	-492	NM_024537	79587	Hs.508725	NM_024537	ENSG00000134905	CARS2	COXPD27|cysRS	cysteinyl-tRNA synthetase 2, mitochondrial	protein-coding
MEIS1_in_B13ko_peak_755	chr15	101334312	101334312	+	5.50992	NA	promoter-TSS (NR_132373)	promoter-TSS (NR_132373)	-125	NR_132373	105371027		NR_132373	ENSG00000259764	PCSK6-AS1	-	PCSK6 antisense RNA 1	ncRNA
MEIS1_in_B13ko_peak_996	chr19	12401270	12401270	+	5.50992	NA	promoter-TSS (NM_001080821)	promoter-TSS (NM_001080821)	4	NM_001322498	90576	Hs.546637	NM_203381	ENSG00000196466	ZNF799	HIT-40|ZNF842	zinc finger protein 799	protein-coding
MEIS1_in_B13ko_peak_1171	chr21	5601992	5601992	+	5.50992	NA	Intergenic	Intergenic	32788	NM_001322975	102723360	Hs.743984	NM_001322975		LOC102723360	-	uncharacterized LOC102723360	protein-coding
MEIS1_in_B13ko_peak_277	chr1	226960318	226960318	+	5.50992	NA	intron (NM_020247, intron 1 of 14)	(GTG)n|Simple_repeat|Simple_repeat	20081	NM_020247	56997	Hs.118241	NM_020247	ENSG00000163050	COQ8A	ADCK3|ARCA2|CABC1|COQ10D4|COQ8|SCAR9	coenzyme Q8A	protein-coding
MEIS1_in_B13ko_peak_1915	chr8	100426683	100426683	+	5.50992	NA	Intergenic	(CAC)n|Simple_repeat|Simple_repeat	43920	NR_039681	100616451		NR_039681	ENSG00000265599	MIR4471	-	microRNA 4471	ncRNA
MEIS1_in_B13ko_peak_573	chr12	113246063	113246063	+	5.50992	NA	intron (NM_001301214, intron 1 of 26)	intron (NM_001301214, intron 1 of 26)	1802	NM_001301214	53373	Hs.524763	NM_017901	ENSG00000186815	TPCN1	TPC1	two pore segment channel 1	protein-coding
MEIS1_in_B13ko_peak_1677	chr6	83031991	83031991	+	5.50992	NA	intron (NM_198920, intron 5 of 9)	THE1B-int|LTR|ERVL-MaLR	33850	NM_001304437	90025	Hs.148609	NM_198920	ENSG00000118420	UBE3D	C6orf157|H10BH|UBE2CBP|YJR141W	ubiquitin protein ligase E3D	protein-coding
MEIS1_in_B13ko_peak_765	chr16	1420841	1420841	+	5.50992	NA	promoter-TSS (NM_001272051)	promoter-TSS (NM_001272051)	-41	NM_001272051	283951	Hs.58373	NM_001010878	ENSG00000174109	C16orf91	CCSMST1|URLC5|gs103	chromosome 16 open reading frame 91	protein-coding
MEIS1_in_B13ko_peak_973	chr19	2877694	2877694	+	5.50992	NA	exon (NM_001300843, exon 4 of 4)	exon (NM_001300843, exon 4 of 4)	10359	NM_001300843	80032	Hs.287433	NM_024967	ENSG00000172000	ZNF556	-	zinc finger protein 556	protein-coding
MEIS1_in_B13ko_peak_903	chr17	64965976	64965976	+	5.50992	NA	TTS (NR_026903)	TTS (NR_026903)	9609	NR_026903	201283	Hs.396447	NM_153032	ENSG00000214174	AMZ2P1	-	archaelysin family metallopeptidase 2 pseudogene 1	pseudo
MEIS1_in_B13ko_peak_824	chr17	5078481	5078481	+	5.50992	NA	promoter-TSS (NM_153018)	promoter-TSS (NM_153018)	22	NM_153018	124961	Hs.48832	NM_153018	ENSG00000180787	ZFP3	ZNF752	ZFP3 zinc finger protein	protein-coding
MEIS1_in_B13ko_peak_1064	chr1_GL383519v1_alt	49868	49868	+	5.50992	NA	promoter-TSS (NM_001171811).2	promoter-TSS (NM_001171811).2	17	NM_001005742	2629	Hs.282997	NM_000157	ENSG00000177628	GBA	GBA1|GCB|GLUC	glucosylceramidase beta	protein-coding
MEIS1_in_B13ko_peak_1744	chr7	27225669	27225669	+	5.50362	NA	Intergenic	CpG	-16876	NM_001304519	2128	Hs.369879	NM_001989	ENSG00000106038	EVX1	EVX-1	even-skipped homeobox 1	protein-coding
MEIS1_in_B13ko_peak_707	chr14_GL000194v1_random	21692	21692	+	5.50362	NA	Intergenic	GSATII|Satellite|centr	93381	NR_046441	727764	Hs.626311	NM_001190825	ENSG00000277400	MAFIP	MIP|TEKT4P4|pp5644	MAFF interacting protein (pseudogene)	pseudo
MEIS1_in_B13ko_peak_1811	chr7	99616951	99616951	+	5.50362	NA	promoter-TSS (NM_145115)	promoter-TSS (NM_145115)	3	NM_145115	221785	Hs.446297	NM_145115	ENSG00000197037	ZSCAN25	ZNF498	zinc finger and SCAN domain containing 25	protein-coding
MEIS1_in_B13ko_peak_1383	chr3	142448050	142448050	+	5.50362	NA	promoter-TSS (NM_019001)	promoter-TSS (NM_019001)	12	NM_001282859	54464	Hs.435103	NM_019001	ENSG00000114127	XRN1	2019-09-01	5'-3' exoribonuclease 1	protein-coding
MEIS1_in_B13ko_peak_1675	chr6	79234703	79234703	+	5.50362	NA	promoter-TSS (NM_001201362)	promoter-TSS (NM_001201362)	35	NM_001201362	9324	Hs.77558	NM_004242	ENSG00000118418	HMGN3	PNAS-24|PNAS-25|TRIP7	high mobility group nucleosomal binding domain 3	protein-coding
MEIS1_in_B13ko_peak_798	chr16	31477396	31477396	+	5.50362	NA	exon (NM_001042454, exon 11 of 11)	exon (NM_001042454, exon 11 of 11)	4191	NM_015927	7041	Hs.513530	NM_015927	ENSG00000140682	TGFB1I1	ARA55|HIC-5|HIC5|TSC-5	transforming growth factor beta 1 induced transcript 1	protein-coding
MEIS1_in_B13ko_peak_1814	chr7	100081863	100081863	+	5.50362	NA	promoter-TSS (NM_001318135)	promoter-TSS (NM_001318135)	-99	NM_001278290	7551	Hs.435302	NM_017715	ENSG00000166526	ZNF3	A8-51|HF.12|KOX25|PP838|Zfp113	zinc finger protein 3	protein-coding
MEIS1_in_B13ko_peak_144	chr1	149900210	149900210	+	5.50362	NA	exon (NM_016074, exon 2 of 2)	exon (NM_016074, exon 2 of 2)	628	NM_016074	51027	Hs.13880	NM_016074	ENSG00000178096	BOLA1	CGI-143	bolA family member 1	protein-coding
MEIS1_in_B13ko_peak_917	chr17	81101855	81101855	+	5.50362	NA	intron (NM_006340, intron 7 of 14)	intron (NM_006340, intron 7 of 14)	23518	NR_030394	724027		NR_030394	ENSG00000207736	MIR657	MIRN657|hsa-mir-657	microRNA 657	ncRNA
MEIS1_in_B13ko_peak_411	chr11	67582552	67582552	+	5.50362	NA	Intergenic	L1M5|LINE|L1	-1043	NM_000852	2950	Hs.523836	NM_000852	ENSG00000084207	GSTP1	DFN7|FAEES3|GST3|GSTP|HEL-S-22|PI	glutathione S-transferase pi 1	protein-coding
MEIS1_in_B13ko_peak_1295	chr22_KI270736v1_random	166642	166642	+	5.50127	NA	NA	(AATGG)n|Simple_repeat|Simple_repeat	NA	NA
MEIS1_in_B13ko_peak_142	chr1	149888480	149888480	+	5.47839	NA	promoter-TSS (NM_175065)	promoter-TSS (NM_175065)	-564	NM_175065	317772	Hs.664173	NM_175065	ENSG00000184270	HIST2H2AB	H2AB	histone cluster 2 H2A family member b	protein-coding
MEIS1_in_B13ko_peak_608	chr12	133080766	133080766	+	5.47054	NA	5' UTR (NM_001300776, exon 1 of 4)	5' UTR (NM_001300776, exon 1 of 4)	563	NM_001300777	7699	Hs.181552	NM_003440	ENSG00000196387	ZNF140	pHZ-39	zinc finger protein 140	protein-coding
MEIS1_in_B13ko_peak_713	chr14_KI270723v1_random	34105	34105	+	5.45629	NA	NA	Intergenic	NA	NA
MEIS1_in_B13ko_peak_1188	chr21	8233227	8233227	+	5.45373	NA	intron (NR_003287, intron 1 of 2)	(TCTC)n|Simple_repeat|Simple_repeat	-16278	NR_128715	103504727		NR_128715	ENSG00000274060	MIR6724-2	hsa-mir-6724-2	microRNA 6724-2	ncRNA
MEIS1_in_B13ko_peak_1211	chr21	8463599	8463599	+	5.45015	NA	Intergenic	Intergenic	22453	NR_003287	100008589		NR_003287		RNA28SN5	RN28S1|RNA28S5	RNA, 28S ribosomal N5	rRNA
MEIS1_in_B13ko_peak_268	chr1	218345167	218345167	+	5.4167	NA	promoter-TSS (NM_003238)	promoter-TSS (NM_003238)	-117	NM_003238	7042	Hs.133379	NM_003238	ENSG00000092969	TGFB2	G-TSF|LDS4|TGF-beta2	transforming growth factor beta 2	protein-coding
MEIS1_in_B13ko_peak_448	chr12	1796338	1796338	+	5.4167	NA	intron (NM_172364, intron 35 of 37)	CpG	-23929	NM_001163926	654429	Hs.585579	NM_001039029	ENSG00000166159	LRTM2	-	leucine rich repeats and transmembrane domains 2	protein-coding
MEIS1_in_B13ko_peak_235	chr1	193121794	193121794	+	5.4167	NA	promoter-TSS (NM_024529)	promoter-TSS (NM_024529)	-164	NM_024529	79577	Hs.378996	NM_024529	ENSG00000134371	CDC73	C1orf28|FIHP|HPTJT|HRPT1|HRPT2|HYX	cell division cycle 73	protein-coding
MEIS1_in_B13ko_peak_1557	chr5	90474015	90474015	+	5.4167	NA	promoter-TSS (NM_006467)	promoter-TSS (NM_006467)	753	NM_203406	153364	Hs.64004	NM_203406	ENSG00000176055	MBLAC2	-	metallo-beta-lactamase domain containing 2	protein-coding
MEIS1_in_B13ko_peak_570	chr12	112409734	112409734	+	5.38482	NA	promoter-TSS (NM_001320140)	promoter-TSS (NM_001320140)	-93	NM_001320137	6128	Hs.528668	NM_000970	ENSG00000089009	RPL6	L6|SHUJUN-2|TAXREB107|TXREB1	ribosomal protein L6	protein-coding
MEIS1_in_B13ko_peak_454	chr12	6689742	6689742	+	5.35439	NA	promoter-TSS (NM_133476)	promoter-TSS (NM_133476)	-170	NM_001135734	171017	Hs.103315	NM_133476	ENSG00000126746	ZNF384	CAGH1|CAGH1A|CIZ|ERDA2|NMP4|NP|TNRC1	zinc finger protein 384	protein-coding
MEIS1_in_B13ko_peak_115	chr1	147084652	147084652	+	5.35163	NA	TTS (NR_121645)	TTS (NR_121645)	104	NR_121645	101447996		NR_121645		RNVU1-8	RNU1-145|vU1.8	RNA, variant U1 small nuclear 8	snRNA
MEIS1_in_B13ko_peak_1222	chr21	9000898	9000898	+	5.35118	NA	Intergenic	L1PA4|LINE|L1	13528	NR_128714
MEIS1_in_B13ko_peak_2024	chrUn_GL000220v1	144253	144253	+	5.32217	NA	Intergenic	Intergenic	-4451	NR_128717	103504733		NR_128717	ENSG00000275692	MIR6724-4	hsa-mir-6724-4	microRNA 6724-4	ncRNA
MEIS1_in_B13ko_peak_1207	chr21	8455919	8455919	+	5.30994	NA	Intergenic	(TCTC)n|Simple_repeat|Simple_repeat	14773	NR_003287	100008589		NR_003287		RNA28SN5	RN28S1|RNA28S5	RNA, 28S ribosomal N5	rRNA
MEIS1_in_B13ko_peak_1597	chr5	180831649	180831649	+	5.3093	NA	promoter-TSS (NR_045680)	promoter-TSS (NR_045680)	-31	NR_045680	100859930	Hs.655606	NR_045680	ENSG00000278970	HEIH	HCCAT2|LINC-HEIH|LINC00848|lncRNA-HEIH	hepatocellular carcinoma up-regulated EZH2-associated long non-coding RNA	ncRNA
MEIS1_in_B13ko_peak_502	chr12	52969920	52969920	+	5.3093	NA	Intergenic	Intergenic	-20054	NR_045962	3856	Hs.533782	NM_002273	ENSG00000170421	KRT8	CARD2|CK-8|CK8|CYK8|K2C8|K8|KO	keratin 8	protein-coding
MEIS1_in_B13ko_peak_1977	chr9	119868901	119868901	+	5.3093	NA	Intergenic	Intergenic	-66159	NR_132393	106146149	Hs.638938	NR_132393	ENSG00000261432	LINC01613	n341773	long intergenic non-protein coding RNA 1613	ncRNA
MEIS1_in_B13ko_peak_796	chr16	30875336	30875336	+	5.3093	NA	promoter-TSS (NR_039744)	promoter-TSS (NR_039744)	-13	NR_039744	100616231		NR_039744	ENSG00000265991	MIR4519	-	microRNA 4519	ncRNA
MEIS1_in_B13ko_peak_377	chr11	17077837	17077837	+	5.3093	NA	promoter-TSS (NM_001017)	promoter-TSS (NM_001017)	-164	NM_001017	6207	Hs.446588	NM_001017	ENSG00000110700	RPS13	S13	ribosomal protein S13	protein-coding
[truncated: 298 more rows]
