# Supplementary material for: MEIS-mediated suppression of human prostate cancer growth and metastasis through HOXB13-dependent regulation of proteoglycans
Source: eLife. 2020 Jun 18;9:e53600. doi: 10.7554/eLife.53600 (PMC7371429; doi:10.7554/eLife.53600)
Supplement: Supplementary file 3. — Adapters and low-quality reads were trimmed before aligning sequences to hg38 transcriptome (ENSEMBL) using kallisto. Transcript counts were then summarized to the gene level with tximport and further analyzed with EdgeR to remove genes with low counts and normalize to library sizes. [file elife-53600-supp3.xlsx]

## Sheet: Sheet1
SYMBOL	Control_1	Control_2	Control_3	LV-MEIS1_1	LV-MEIS1_2	LV-MEIS1_3	HOXB13ko_1	HOXB13ko_2	HOXB13ko_3	HOXB13ko-LV-MEIS1_1	HOXB13ko-LV-MEIS1_2	HOXB13ko-LV-MEIS1_3
A1BG	3.46776	3.74032	4.45454	5.09293	5.28792	5.72711	2.788	2.67729	2.44125	1.99753	1.78067	2.47398
A1BG-AS1	7.74958	7.38827	7.75993	9.27353	9.52922	10.2173	4.79656	4.04953	4.18076	3.8417	3.75824	3.4951
A1CF	28.0782	22.0899	25.4112	25.8993	34.4692	29.3425	45.1804	45.9877	52.4862	46.5744	44.1173	45.9376
A2M-AS1	3.41057	3.0325	2.80971	3.99321	4.43154	4.40192	2.73259	4.0125	2.74562	3.45415	3.17931	2.27283
A4GALT	0.930309	1.7294	1.61933	1.99225	1.54682	1.55431	0.829558	0.802499	0.784462	0.759155	1.04377	0.837358
AAAS	76.1109	79.7253	79.1545	68.1794	61.2634	69.0186	72.1162	72.4343	63.7554	67.2232	74.9105	73.7274
AACS	90.8435	99.166	92.3999	116.358	110.784	115.782	106.428	97.4077	98.2104	97.7049	93.8893	98.8001
AACSP1	3.77938	4.62614	6.37433	3.37576	4.96857	3.99422	4.20309	4.29163	4.16557	2.76263	3.57481	2.35291
AADAT	11.7175	10.2685	11.0339	9.90789	10.661	9.84394	12.6093	12.2849	14.0614	12.0874	13.276	13.4514
AAED1	16.3572	18.5011	19.4416	18.4862	16.5039	17.1029	14.6926	12.9066	13.5665	13.3172	14.4247	14.4681
AAGAB	66.1101	67.0142	66.6239	80.0222	79.5909	76.013	71.0655	68.1078	73.3116	76.1432	75.312	74.485
AAK1	120.551	100.077	113.874	77.4153	91.5807	83.5389	227.26	256.858	282.001	205.414	194.194	189.936
AAMDC	1.45713	2.60962	3.08467	2.23131	2.26169	2.13766	2.25281	1.89524	1.489	1.40995	2.59668	1.89859
AAMP	130.127	145.356	133.402	130.493	129.699	129.118	123.272	119.223	112.107	114.405	107.91	128.594
AAR2	32.9205	37.5646	36.782	35.5486	29.6239	31.6898	34.6202	30.5092	27.4739	34.7313	30.5503	35.6476
AARD	2.32957	2.37964	2.58919	1.70464	1.31347	1.20912	2.28933	1.22103	1.44462	1.44974	1.49698	1.7122
AARS	201.237	215.808	200.877	223.631	213.555	220.86	250.861	245.477	251.492	250.575	255.161	266.06
AARS2	40.3974	39.1557	39.2063	39.3644	37.8831	36.8758	36.8559	37.5781	33.2002	35.5844	32.2985	35.8989
AARSD1	33.3496	30.6945	35.121	29.5588	24.8577	29.2975	35.2927	34.2538	33.7467	33.3588	34.8716	34.3126
AASDH	16.92	14.8296	16.0391	20.808	18.6087	18.8737	17.6972	21.2139	19.4689	17.6124	19.8316	17.425
AASDHPPT	50.76	45.433	44.6782	49.4175	50.9513	47.9875	58.1797	60.0042	61.7581	66.6502	56.6823	64.7926
AASS	23.9203	19.164	20.5116	30.351	33.13	28.04	27.9028	29.24	27.5199	27.7909	26.2678	22.2466
AATF	32.5899	37.0524	36.1651	38.4339	34.5456	33.9172	32.3804	30.5648	32.3234	32.0933	38.3184	34.9099
AATK	8.25649	10.6921	9.60032	13.8904	12.8902	14.1738	13.6047	11.2699	9.73447	9.60331	9.87566	11.5236
ABAT	21.5659	22.0541	20.6266	30.1358	31.1048	29.3533	29.4316	29.4268	30.1059	30.0023	30.1965	30.4942
ABCA10	2.34328	1.77237	1.74213	1.61829	1.30724	2.02065	1.3736	2.02875	1.61936	1.51937	1.90816	0.941614
ABCA11P	6.66483	6.93891	7.46721	7.3067	5.06048	6.2536	6.25532	6.02148	6.52076	6.28267	4.864	5.93281
ABCA17P	2.03705	2.89485	2.16917	2.38504	1.55351	1.66845	2.60954	3.00305	2.83317	2.43325	2.92773	2.74635
ABCA2	362.6	401.661	357.821	288.113	275.516	310.32	402.505	389.538	349.993	348.23	361.666	375.186
ABCA3	208.855	236.494	200.562	161.866	147.176	164.568	206.163	192.214	186.123	194.72	202.84	218.826
ABCA5	27.308	24.7684	30.3678	25.2727	29.2037	27.1753	30.3869	33.3295	33.0824	27.1509	27.7843	24.2847
ABCA7	71.343	73.0239	71.559	76.2037	74.763	86.7081	64.3184	63.3974	58.0502	57.0125	52.5096	49.8427
ABCA9	0.853213	1.12515	1.40543	0.713401	1.46123	1.2243	1.38234	1.19144	1.39964	0.946352	1.20075	0.546391
ABCB10	84.2492	72.9374	72.0962	83.173	77.3879	76.9011	80.3497	78.5054	78.6245	86.4244	71.9769	84.2462
ABCB6	98.2586	105.001	102.695	97.9231	91.4745	91.3931	118.571	108.629	107.975	108.33	104.235	109.761
ABCB7	33.7818	33.68	33.6204	37.0227	37.9205	35.305	37.496	40.5437	41.0773	41.4878	36.7326	44.38
ABCB8	70.3073	75.7523	70.4618	79.2837	76.3648	84.1198	62.5119	59.6983	55.6554	57.601	53.5418	51.4885
ABCB9	14.1326	15.492	15.9835	13.0004	11.9932	16.0553	15.7435	16.9984	12.6752	13.6797	13.1015	13.4271
ABCC1	32.1305	22.48	28.2745	18.1434	28.7178	24.964	32.4442	34.8065	30.6842	24.7914	16.4883	29.5838
ABCC10	19.9518	19.2085	19.6205	18.7894	18.4711	20.899	17.9719	15.3987	15.552	16.6237	14.1464	14.0655
ABCC11	5.1332	5.24681	3.54219	9.01139	9.00405	9.28759	5.68629	5.557	6.32852	5.09913	5.10122	5.14328
ABCC2	2.38672	1.94692	2.51687	1.99572	1.74123	1.49443	2.15754	2.54855	2.53728	2.44519	2.32841	2.08037
ABCC3	0.783924	0.326943	0.528054	0.560326	0.728497	0.812285	1.77083	1.13636	1.12374	1.32378	1.30531	1.01949
ABCC4	23.1437	23.0345	23.066	18.5318	17.0082	18.571	27.0609	27.399	31.4618	30.9955	25.6068	28.8801
ABCC5	89.6585	75.1503	72.835	79.3588	82.6847	81.7126	52.9819	55.7921	56.4816	49.5748	49.298	44.8987
ABCC6	4.18147	5.47349	5.14294	3.61097	5.11845	4.08448	4.77506	4.54706	4.36683	3.83814	3.50762	5.10702
ABCC6P1	3.18425	3.04996	2.75395	1.79009	1.30657	1.8531	3.48392	3.42438	4.023	4.75268	4.01741	4.56434
ABCC6P2	2.22897	1.35817	0.413915	0.11759	0.499518	0.76135	0.469821	1.14193	0.579779	1.53557	1.11995	1.13254
ABCC8	2.03505	1.46999	0.925332	1.66021	1.68744	2.44248	1.65912	1.22119	1.24801	1.02486	1.80652	0.637987
ABCC9	12.7287	11.4771	9.26366	20.3933	20.0429	17.3302	12.7761	16.7696	16.1648	12.429	16.2925	13.0587
ABCD1	11.5707	14.9161	13.3402	14.4438	13.7808	17.6149	11.5032	9.76956	8.59343	10.4384	12.6055	12.042
ABCD3	81.2276	69.1529	70.6742	100.334	102.137	99.6284	84.4063	83.9484	87.2151	95.6186	84.8665	95.4994
ABCD4	19.8034	18.7008	20.3917	23.1498	21.5031	21.3092	15.1418	17.8167	16.6673	15.3759	15.3505	14.7219
ABCE1	208.204	187.499	195.048	206.492	200.702	190.269	207.766	206.273	214.275	227.542	203.891	220.678
ABCF1	16.0494	17.9122	19.5898	15.9257	15.3251	14.5078	16.9807	17.5434	15.8769	15.3962	15.3643	20.7093
ABCF2	141.188	156.049	135.823	142.467	132.032	138.293	135.178	132.662	134.74	139.837	140.768	151.451
ABCF3	85.1814	95.4196	84.9763	78.8047	79.3097	75.3098	82.7899	76.3011	74.203	72.9548	75.9543	72.8502
ABCG1	0.804936	0.694502	0.364266	0.723051	1.20917	0.761793	2.06473	2.07291	0.908456	1.29614	1.26998	1.82068
ABCG2	21.0482	15.4781	16.656	6.91755	6.28103	4.77394	18.5268	18.283	19.9325	21.4841	16.8609	21.3327
ABHD1	7.34541	5.58544	8.47178	5.53805	5.95934	5.73585	6.25255	7.44675	6.29666	5.1851	5.24967	3.47601
ABHD10	110.009	102.51	103.483	110.958	107.199	98.6614	132.342	127.702	133.145	140.444	137.135	140.477
ABHD11	48.184	50.1937	48.6677	52.7786	45.3676	49.6703	39.7185	34.726	37.1733	35.0065	34.439	34.6826
ABHD12	48.8993	60.0101	52.4355	53.1821	47.014	50.2559	52.0962	47.0683	41.9687	50.5597	48.4148	50.2814
ABHD13	15.9315	13.5758	12.6462	18.7051	16.6869	18.1706	15.7063	18.0039	16.9016	17.992	17.6638	15.9497
ABHD14A	6.99718	8.50131	8.49178	8.00698	5.90213	6.40349	7.89778	7.03174	7.52434	7.33337	7.65033	7.63692
ABHD14A-ACY1	8.03859	10.2186	6.10981	5.1808	6.70291	6.19705	7.86556	5.83573	6.5797	3.0822	7.45381	7.54994
ABHD14B	36.1213	42.5	38.7483	32.5402	31.5926	32.6034	36.8877	35.5891	33.0285	36.4774	32.2364	34.5709
ABHD15	13.6579	16.404	14.586	12.7053	12.1277	13.3118	14.2502	13.9936	12.1681	13.5043	12.8066	13.0068
ABHD16A	39.7506	51.3925	34.2644	40.032	38.9993	45.7022	40.4908	41.1122	32.0971	33.7044	41.8525	43.0065
ABHD17A	85.6281	102.429	91.3642	85.5199	81.2761	95.1636	82.5939	69.9654	68.719	70.9411	76.4395	71.3218
ABHD17B	13.24	12.6436	13.7285	13.6415	14.9024	13.9901	15.1763	16.1066	15.6609	17.2999	17.1286	17.5752
ABHD17C	18.6062	18.029	18.391	11.3448	13.0777	11.6943	20.6283	19.1553	20.2177	20.8768	18.3864	19.4187
ABHD18	17.5517	15.3314	17.4704	22.3457	25.5227	25.0262	18.7079	19.5023	20.9804	20.2922	19.9555	18.2605
ABHD2	151.463	140.224	133.595	87.9224	91.0522	89.6479	161.444	168.265	168.577	166.576	157.584	163.313
ABHD3	16.2805	15.7038	13.8812	18.7604	17.9645	17.3285	16.3297	15.6707	14.5547	17.6575	13.1404	16.4766
ABHD4	21.339	23.8657	20.5443	26.5081	24.4679	24.9429	21.4579	19.2251	18.5294	20.0037	19.2294	21.1306
ABHD5	12.1133	12.5381	12.1479	14.7512	14.5776	13.912	12.8891	14.445	12.4088	14.2495	13.2077	14.3946
ABHD6	5.52371	5.57731	5.16644	6.14279	5.39097	5.85042	5.97282	5.76227	6.35345	7.24099	6.78006	7.59183
ABHD8	6.92524	7.52657	7.07079	9.54162	6.72043	9.07514	6.81275	6.25573	6.18683	5.61628	5.73507	6.51769
ABI1	43.6826	39.2769	38.987	46.3753	46.5371	42.9164	43.69	40.9858	42.1548	42.3379	48.5154	46.4646
ABI2	119.946	106.683	107.851	137.003	146.478	138.485	110.985	116.035	121.119	119.505	116.189	109.07
ABL1	99.95	106.531	95.4249	94.9088	86.0594	94.2206	88.3756	85.2743	85.9343	88.2897	90.567	93.5449
ABL2	79.7509	67.8009	75.1394	82.1975	98.4596	91.2414	81.3148	91.1705	91.6842	77.7338	72.8672	69.6623
ABLIM1	171.654	149.358	144.823	163.505	163.904	159.664	165.258	171.325	173.335	170.987	166.584	176.457
ABLIM2	0.872164	1.68616	1.50366	0.332042	0.609353	0.740146	2.70989	3.03554	2.53167	2.08768	1.9671	2.3127
ABLIM3	2.20948	2.37792	2.81455	4.42723	3.60925	4.36686	9.56757	10.6767	9.98407	11.0837	11.7223	10.5268
ABR	53.0323	57.1942	48.8636	38.8265	52.0258	54.9409	34.0866	27.715	33.0122	37.5312	35.0107	46.0184
ABRACL	108.672	109.903	106.182	256.78	248.101	239.104	102.81	108.023	109.112	110.419	106.264	115.595
ABRAXAS1	7.22562	7.23235	6.80054	10.6972	11.3321	9.90939	8.7785	7.71343	8.29931	7.62271	7.94112	8.10891
ABRAXAS2	32.0375	30.6536	31.924	30.7693	31.4989	27.9775	30.03	30.5996	31.6994	32.34	34.2437	34.0924
ABT1	26.2812	27.0192	28.0285	24.6767	20.0841	23.0925	26.214	23.7958	25.1028	26.8649	23.2038	25.5195
ABTB1	9.88453	12.7975	11.3739	21.3614	24.1398	21.0201	7.90845	9.76956	8.59343	5.92141	8.59102	6.37987
ABTB2	15.9315	18.3749	14.921	9.46321	8.95281	10.6211	19.5776	16.3989	19.2906	17.043	17.2222	18.9004
ACAA1	44.9329	52.6972	47.0852	52.1355	49.192	55.4758	41.7138	42.6194	39.6949	39.3672	39.139	39.8354
ACAA2	8.12831	9.62806	9.7967	10.2796	11.0427	11.3994	6.46097	6.16739	6.73801	6.62898	6.97433	7.52833
ACACA	212.308	204.478	184.595	176.375	213.344	202.809	205.413	227.946	242.187	204.581	185.708	197.695
ACACB	40.6547	37.2856	36.665	31.4271	34.5521	34.5983	34.2756	35.5896	38.551	36.0317	33.9062	30.1634
ACAD10	47.533	50.044	49.2706	43.1559	42.0552	38.7612	50.1333	51.1692	51.9193	49.9275	50.8448	46.7032
ACAD11	48.27	40.7772	42.8675	48.1746	51.7135	49.8557	44.0041	46.6147	48.3229	43.8168	44.8188	38.764
ACAD8	46.8046	47.5203	47.284	46.675	45.7837	44.9966	51.7198	51.0719	49.6241	48.9713	46.3463	46.7338
ACAD9	81.5063	84.1062	77.3287	70.7907	65.6845	68.934	76.6391	73.2427	77.3445	73.019	77.5412	73.5884
ACADL	21.1046	19.9309	24.0325	5.42336	5.81229	5.73569	32.6487	33.2113	34.012	31.8053	34.5987	29.5388
ACADM	136.759	128.987	130.896	146.763	140.667	134.447	133.338	139.354	144.056	149.06	150.062	148.611
ACADS	32.0375	37.6144	34.1216	33.5363	29.8114	32.0483	26.933	22.9236	22.6068	23.2301	24.2877	24.9214
ACADSB	49.3944	43.9631	49.1259	61.7447	64.2825	61.9131	48.8445	51.4217	53.1472	54.0378	54.0527	50.3991
ACADVL	331.422	360.104	345.226	374.212	353.612	373.47	353.005	329.164	321.737	327.12	350.225	318.994
ACAP1	3.40476	4.41465	5.57128	4.47131	4.28338	5.4301	4.23673	4.7729	3.49915	2.88416	3.08384	2.17141
ACAP2	100.837	74.3081	82.3016	97.9039	109.959	101.267	91.2278	103.324	109.839	101.141	91.009	95.0395
ACAP3	115.641	135.314	129.221	109.712	108.343	123.803	117.577	114.574	98.0339	100.827	94.7945	88.3446
ACAT1	88.5161	95.3026	93.422	94.1194	92.9515	89.5814	80.4301	78.9937	76.3657	82.9418	87.5318	83.9997
ACAT2	91.7613	99.4965	93.511	119.081	109.224	109.954	95.2989	100.434	93.1049	105.452	104.987	106.573
ACBD3	162.121	150.399	158.72	164.144	164.897	154.83	171.407	175.293	177.884	186.532	186.474	183.627
ACBD4	17.3046	16.6526	17.958	15.7058	18.0495	18.6845	15.3052	15.7031	14.94	15.0268	15.0757	10.425
ACBD5	86.2595	71.8741	77.1935	81.8886	80.2591	75.7024	75.4816	83.1882	87.3149	85.9176	83.1095	88.3516
ACBD6	73.2649	72.8597	73.3208	75.1513	72.3473	76.5944	67.3283	73.5226	68.2761	67.6644	71.9793	65.8666
ACBD7	24.8529	20.9067	23.2365	22.7121	24.7031	22.7949	20.538	18.1564	20.6432	20.6944	23.7726	22.3823
ACCS	7.15175	7.52288	9.0991	7.36027	7.7341	8.32664	7.1342	7.32717	6.66793	5.99732	5.58015	3.78805
ACD	33.026	37.6577	31.6541	32.5402	30.9364	35.416	22.3428	24.9473	20.6813	20.3833	23.1636	23.127
ACE	41.8142	49.1783	45.5179	47.8427	48.892	50.7295	40.8274	40.9336	37.9994	37.0832	42.9467	40.3948
ACER2	10.059	8.30111	9.60032	9.09546	9.23405	9.54788	9.56757	10.0138	10.091	9.22373	10.1968	9.09132
ACER3	41.5154	37.5811	42.7302	45.9038	51.7257	46.2913	41.8193	44.9576	46.231	47.36	40.0261	42.6875
ACHE	10.0008	11.1546	8.28943	6.08745	6.56227	6.47628	9.73348	9.28108	8.09423	8.12296	8.35015	7.53622
ACIN1	307.452	318.056	321.468	288.176	296.655	305.472	277.568	277.101	290.747	271.702	298.388	260.28
ACKR2	1.05577	1.36311	1.29282	0.752019	1.26681	1.0688	1.37154	1.43133	1.83452	1.08891	0.78008	1.15423
ACLY	527.659	521.197	480.363	552.463	528.731	535.644	632.344	615.273	597.226	629.301	625.178	666.258
ACO1	25.1188	25.6751	25.4709	49.5949	49.4407	46.4822	25.2569	27.6074	24.9393	28.0592	27.5347	30.3078
ACO2	198.05	219.806	203.556	200.313	177.837	197.101	196.43	185.158	186.637	192.551	203.881	215.535
ACOT11	10.186	10.669	10.5497	8.398	9.78424	7.53138	7.59706	9.37603	9.19324	7.82733	8.37971	7.4544
ACOT13	35.1972	36.3879	33.1004	42.1325	38.477	38.5882	40.3774	39.2372	40.2642	42.7842	41.7489	40.9454
ACOT2	16.6337	18.2094	16.3199	32.3346	28.3819	31.8797	13.9952	16.2817	14.4054	17.5407	13.9943	16.8998
ACOT4	5.29775	8.06331	7.26151	2.13551	1.47428	1.85266	9.67818	8.30033	7.67307	8.95803	8.10891	10.1225
ACOT7	38.4817	47.9112	38.3987	40.5688	31.688	36.8586	33.235	34.383	32.4637	32.7136	35.8876	40.063
ACOT8	21.9961	21.4426	20.2646	16.9288	16.028	14.9856	21.7041	19.6362	18.4265	18.7912	19.8432	17.6376
ACOT9	2.33577	2.19157	2.20512	2.16042	2.34885	3.01408	2.59899	2.29777	2.54439	2.13857	1.86158	2.39878
ACOX1	47.9751	43.1972	44.6635	60.8871	64.4423	58.9915	47.7072	48.3908	51.48	47.8407	41.5152	49.168
ACOX3	6.16329	7.52288	7.09421	9.85059	7.54661	8.03058	5.7516	5.96641	6.13307	6.14915	6.06189	6.14063
ACOXL	2.22197	2.29833	2.2687	0.508168	0.813895	0.372311	1.44125	2.38513	2.29601	1.59594	1.64823	1.95365
ACP1	90.0074	87.2605	82.3567	93.6706	88.8801	89.2246	88.6842	88.1214	86.528	95.6815	93.8589	99.0385
ACP2	25.8667	31.286	28.9552	26.2792	24.421	27.4891	29.0318	27.563	24.354	25.1624	29.4252	29.3059
ACP6	35.2639	33.4505	37.6631	33.1165	35.5482	35.4939	38.0788	41.0469	41.8971	38.8115	36.2694	29.4232
ACPP	13.3283	13.5956	9.93628	15.7131	14.4352	11.998	8.02897	10.3779	9.4402	9.38353	9.18912	9.17204
ACRBP	4.12824	4.92879	4.27966	5.36802	3.93736	4.62591	5.6963	6.41999	5.81215	5.16225	7.38667	4.90453
ACRV1	3.43051	3.06968	3.817	3.43111	3.28113	3.14562	4.53492	3.38445	3.20916	3.18845	3.01087	3.42918
ACSBG1	1.59549	1.68524	1.84801	1.80142	1.62491	1.77078	1.9025	1.00872	1.11783	0.817974	0.563618	1.40109
ACSF2	4.98759	5.92507	5.70131	8.80776	9.80802	10.3577	3.77616	4.4415	3.71595	3.7837	3.63882	3.62398
ACSF3	40.7186	42.706	44.4939	35.3222	38.3951	38.8086	37.8681	40.4329	39.0981	36.2789	37.2239	36.7278
ACSL1	33.3797	34.8919	33.9299	15.7783	14.3613	12.9897	41.0908	40.7566	40.1378	41.5743	44.1606	45.4561
ACSL3	151.408	134.807	138.8	142.28	141.136	138.518	152.583	143.368	164.131	169.861	168.368	162.089
ACSL4	22.3856	17.4669	19.2778	17.1002	18.1869	18.2076	26.6565	24.3541	25.3167	24.8623	25.6125	26.5163
ACSL6	8.56693	7.68311	8.15834	6.71497	6.13465	5.9313	8.61973	9.58335	7.62741	7.78705	7.32894	7.62042
ACSM3	31.3832	31.4364	32.5011	36.5437	38.4134	35.1662	55.5651	59.388	59.916	61.5757	68.0225	68.321
ACSS1	1.71303	2.15246	1.48283	0.886997	1.0257	0.703139	1.38531	1.43883	1.6341	1.7081	0.883189	1.2879
ACSS2	45.0689	54.6403	52.0387	43.0106	44.9557	43.0832	50.3342	47.9073	46.7565	50.0026	51.6668	49.9626
ACSS3	1.45622	0.995172	0.927951	2.05519	1.31479	1.73831	1.3327	1.20895	1.21096	0.951185	1.86364	1.03851
ACTA2	8.81651	8.67638	9.14695	4.70379	6.11161	6.04883	12.0591	13.6728	13.3185	12.0518	15.949	12.3795
ACTB	2262.03	2577.7	2312.14	1834.1	1609.23	1760.9	2180.09	2087.87	1895.47	2168.24	2207.79	2334.13
ACTG1	1687.62	1982.76	1724.49	1639.93	1508.82	1579.36	1724.49	1654.96	1519.86	1680.48	1703.93	1858.04
ACTL10	3.53064	2.55086	2.46755	3.54179	1.88385	3.06868	2.26746	2.2409	2.35339	1.79505	2.00725	2.35258
ACTL6A	123.797	125.509	117.712	134.424	122.479	120.048	130.734	133.291	131.421	133.552	134.405	140.953
ACTL8	1.97691	1.98881	1.85066	0.553404	0.234367	0.259051	1.16138	1.08163	0.891435	0.910986	1.48536	1.59497
ACTN1	165.619	171.838	150.277	166.149	157.717	166.597	177.347	167.208	165.562	173.511	178.75	180.598
ACTN2	46.1676	47.6888	48.7756	57.554	61.921	59.1377	44.2984	46.2309	45.8911	46.8026	49.0579	50.4814
ACTN4	844.538	953.683	864.474	732.681	669.962	750.367	867.403	805.501	776.551	796.766	898.697	905.967
ACTN4	844.538	953.683	864.474	732.681	669.962	750.367	867.403	805.501	776.551	796.766	898.697	905.967
ACTR10	39.2	34.707	36.363	39.7557	38.348	37.3052	38.229	38.3774	37.39	39.4122	39.5853	40.3204
ACTR1A	109.722	127.741	124.806	127.709	117.404	119.863	109.328	110.213	107.401	116.737	114.251	121.641
ACTR1B	62.6214	68.6139	58.1803	40.2878	36.0456	37.4884	64.1525	64.4791	58.7634	59.7834	60.5788	64.2373
ACTR2	301.711	255.605	260.132	346.45	342.126	327.364	282.157	291.087	311.715	316.34	304.329	310.939
ACTR3	170.659	142.536	151.584	172.392	173.624	163.801	144.954	142.795	149.015	162.468	156.936	160.932
ACTR3B	40.5515	42.0518	39.7643	26.5789	27.0197	25.9372	43.7142	39.2885	41.9766	43.0284	41.2848	44.2185
ACTR3C	4.83798	4.4296	4.23292	4.67925	6.48114	5.22571	4.13113	5.11889	6.64564	4.49515	3.76966	4.43838
ACTR5	9.1868	9.12258	9.29188	8.96515	8.10909	7.32744	8.6274	8.23434	7.41674	7.85725	7.34653	8.61283
ACTR6	36.0007	33.4046	32.2852	38.1533	40.0463	38.0064	36.5554	39.4251	35.7457	37.0071	36.6133	37.0617
ACTR8	28.2	27.3677	23.2875	26.7848	28.4052	31.5302	30.1406	29.0993	30.808	30.2523	29.346	31.6601
ACVR1	3.83752	3.97762	3.93266	5.25734	5.6248	6.03219	5.14326	5.02434	5.02769	5.39	5.66044	5.34314
ACVR1B	44.8874	45.7426	44.5316	44.217	41.436	43.6686	41.9203	43.335	42.3253	39.8556	42.9953	46.5731
ACVR1C	1.5699	1.21058	1.07955	1.88157	2.15617	1.99839	1.4379	1.9888	2.60299	2.39134	1.24449	1.27597
ACVR2A	10.9402	7.48361	9.30771	9.40285	10.4858	10.5337	9.95856	10.7123	10.439	10.5682	9.81838	11.0371
ACVR2B	29.494	27.1863	27.7228	29.557	34.2188	30.7359	29.6054	34.0468	37.5052	28.6601	29.1129	28.07
ACVR2B-AS1	2.42495	1.6767	1.49554	1.44721	1.61137	1.34278	1.86996	2.29139	2.8253	1.84208	1.86308	1.62193
ACY1	39.7462	43.8845	40.7446	35.6382	32.8809	40.6822	41.5002	40.7319	35.0682	40.9762	37.0565	36.0176
ACY3	2.09319	1.68616	2.27478	2.37964	2.62491	2.36847	2.37807	2.51217	1.96116	1.89789	1.72623	2.51207
ACYP1	13.4313	13.8737	16.2664	12.7283	14.812	12.5825	14.1578	14.0922	16.0815	15.8663	16.2587	13.5174
ACYP2	9.14665	10.5504	7.63992	8.31207	8.18818	6.77047	7.28937	8.40621	7.5733	7.33576	7.64846	7.5288
ADA	2.90721	3.4588	3.27722	3.43111	3.32801	3.0346	2.37807	3.24489	3.35179	2.61908	3.33203	2.35258
ADA2	0.913004	1.86939	2.08339	0.748732	0.797068	1.06817	0.770758	2.06762	1.20773	0.820866	1.3698	0.927571
ADAL	25.9409	21.9558	24.4608	20.469	22.6638	20.5941	22.6327	24.5821	26.5787	23.9512	26.8908	25.4761
ADAM10	92.4622	86.513	83.6614	111.571	115.07	106.983	95.2368	98.4266	104.102	105.269	98.5222	100.468
ADAM11	21.8623	21.0554	20.0103	21.9148	20.718	23.6847	18.8586	17.8643	15.1544	15.6386	17.1018	17.1459
ADAM15	291.522	350.418	305.414	294.92	262.781	293.241	280.453	255.207	236.37	250.238	257.317	267.469
ADAM17	34.1303	28.3434	27.5374	33.2492	35.5376	37.3906	33.1267	30.1498	33.5169	32.6199	31.3979	31.835
ADAM22	57.7373	53.2655	55.7898	42.6675	51.0919	45.741	58.8433	63.7813	72.0636	61.036	60.2977	57.4188
ADAM23	1.68618	1.59969	2.46755	0.885447	1.17183	1.18423	2.43337	2.93087	2.78128	3.30232	2.04739	2.91082
ADAM32	2.91098	4.46052	5.54306	3.38188	5.00559	4.30991	4.13602	2.81576	4.99135	4.30817	4.10414	2.55021
ADAM33	0.698771	1.30177	1.48759	1.16291	2.20697	1.70295	1.06954	0.807545	0.466926	0.560011	0.886852	1.00389
ADAM8	2.26763	4.28026	2.89166	3.26508	3.98423	4.21883	3.53945	3.07043	2.92391	2.99866	2.16783	1.35572
ADAM9	90.27	81.1209	81.9427	92.6636	86.935	88.6129	81.7162	86.9666	88.4509	92.7597	95.9456	98.8371
ADAMTS1	15.4425	14.7901	13.8539	31.3105	35.2632	34.3505	17.6656	17.5388	17.2166	18.3658	16.0139	17.9456
ADAMTS13	12.7336	12.5381	13.0125	10.6254	12.7261	13.0266	12.0009	13.0493	12.2127	10.818	11.0399	9.05144
ADAMTS13	12.7336	12.5381	13.0125	10.6254	12.7261	13.0266	12.0009	13.0493	12.2127	10.818	11.0399	9.05144
ADAMTS20	2.84907	2.85351	2.35189	1.82623	2.01555	2.36847	5.03265	5.44304	5.63387	5.08634	4.85754	5.34314
ADAMTS3	14.5942	10.5493	11.0654	13.7244	15.9838	14.2108	14.8767	14.1659	14.8335	14.3101	14.0909	12.9956
ADAMTS4	3.18301	2.15673	3.1254	2.07939	2.23159	2.51586	2.85853	3.03848	2.63913	3.07393	2.30014	2.24287
ADAMTS7	1.35687	2.41698	1.88922	1.06588	0.962205	0.518102	2.1812	2.05859	2.04978	2.01176	1.86276	1.37612
ADAMTSL2	1.65752	0.965251	1.01062	0.799858	0.197835	0.336797	1.56844	1.00809	0.611942	1.30006	0.949636	1.67982
ADAMTSL3	7.68376	6.41768	12.3258	6.20882	7.74142	7.18868	10.9823	11.0923	11.392	9.24242	8.58193	6.75498
ADAMTSL4	6.34741	8.311	7.70872	8.61263	7.84187	8.57547	4.28155	4.04527	3.89251	4.51697	3.55034	4.93217
ADAMTSL5	2.84907	2.93998	2.62177	6.1851	5.32777	6.08503	1.64168	1.5467	1.85033	2.25077	2.17428	1.79434
ADAP1	3.48931	5.38625	5.70622	1.96627	2.01555	1.98435	6.13873	5.96641	6.03247	5.49022	4.84921	6.01242
ADAP2	9.38178	10.1677	10.0103	8.98635	8.22484	8.4309	8.16024	10.0081	10.6224	8.39072	7.57499	9.77021
ADAR	584.776	572.224	530.997	598.389	611.665	596.534	543.969	552.491	542.285	543.699	515.699	547.418
ADARB1	32.2067	31.1179	34.9525	25.2699	25.4829	27.3831	26.9505	26.5047	26.6083	23.4551	25.3341	21.9591
ADAT1	47.6548	42.6659	44.5373	49.6308	54.1075	51.2138	50.3032	53.9097	56.3479	51.5372	49.0185	51.1298
ADAT2	29.7975	23.6595	27.5025	22.3479	23.8222	21.6123	30.5697	28.7958	30.965	30.03	25.6488	21.504
ADAT3	7.26804	10.9817	9.38554	7.87232	5.41441	9.21168	7.485	7.46633	5.38536	5.44752	5.84773	6.54244
ADCK1	8.28515	9.72787	9.38357	7.97299	7.08424	7.49586	8.40619	8.27165	7.10594	6.79444	6.58377	8.14541
ADCK2	48.2598	60.8316	51.9889	46.3199	39.1861	48.5906	56.1334	50.1039	43.5859	52.8763	50.944	57.0201
ADCK5	8.6635	10.117	9.7931	10.0166	8.76531	11.0282	6.96829	7.43184	7.80897	6.30098	6.22247	6.69887
ADCY1	5.25429	4.6102	3.65581	0.620338	0.592552	0.651712	10.4623	11.0079	14.3254	12.2341	9.16233	13.9092
ADCY10P1	3.56059	2.46707	3.86693	3.58302	4.51372	3.95943	2.99716	3.66833	3.0459	3.30266	2.63558	1.68626
ADCY3	77.9652	82.7436	73.6461	61.8526	58.6613	64.076	78.0065	70.8347	71.5277	76.4342	73.3324	75.8922
ADCY6	198.149	206.618	196.184	237.694	252.042	255.092	224.224	226.554	215.072	204.532	193.077	194.879
ADCY7	2.59709	3.72381	3.79944	2.24055	2.96968	3.26902	3.90087	3.61024	4.35713	2.9694	3.48539	4.0136
ADCY9	52.3983	53.1383	47.6188	38.2973	36.2375	43.9895	44.1536	46.8467	42.7165	42.0025	44.6032	48.4097
ADD1	179.361	195.35	183.035	200.022	197.441	197.989	173.332	171.711	166.713	165.976	173.2	180.344
ADD3	125.967	104.431	116.014	201.825	203.734	184.034	68.0124	67.4799	72.9742	73.374	76.003	75.3858
ADGRA3	59.4076	56.0521	53.4288	52.1749	55.0864	53.0305	54.0682	54.9409	53.818	56.814	52.8344	56.9825
ADGRB1	7.38432	9.94404	7.67255	11.6215	10.2184	11.5833	7.35541	6.3851	7.09582	6.1112	7.78812	5.74188
ADGRB2	48.7831	50.8875	40.2134	45.7665	42.7016	53.8456	59.8388	55.5818	51.311	53.3306	54.2359	57.4188
ADGRB3	3.31422	3.24262	3.00733	3.09906	2.48429	3.36766	1.99094	2.09348	2.49602	2.46725	1.68609	2.03358
ADGRD1	1.45502	1.13819	0.822491	2.04789	2.57803	1.82428	3.15233	2.93854	2.35339	3.31576	3.21198	2.63185
ADGRE2	1.02462	1.12091	1.36551	0.977087	1.28753	1.10964	0.912882	1.20057	0.695838	1.11117	1.0068	1.168
ADGRE5	23.2002	27.1191	22.8666	24.1033	20.9083	23.8171	17.6018	18.7608	15.9492	17.2218	19.0053	19.2859
ADGRF1	1.73183	1.99767	1.82499	1.42075	1.58481	1.55366	2.28561	2.63051	2.39016	1.74454	2.18727	2.35099
ADGRF5	0.40701	0.648524	0.539777	1.21749	1.05712	1.26426	1.65912	1.66035	1.27089	1.63363	1.71261	1.43547
ADGRG1	11.557	12.5216	10.2923	1.96748	1.50126	2.01184	19.3896	20.2912	18.5869	18.6903	21.5237	22.656
ADGRG6	36.3402	27.4974	31.6541	84.1174	88.9656	88.3734	36.1134	37.4732	38.6526	39.0585	35.0064	38.7178
ADGRL1	250.307	259.886	247.725	211.691	205.451	220.285	229.996	223.951	211.199	207.747	221.138	234.975
ADGRL2	11.1637	9.59816	9.36899	7.74766	6.51539	7.1054	10.01	9.5951	12.2305	10.4384	10.9997	10.8458
ADGRL3	6.51216	4.06409	4.66522	11.7322	11.6246	11.3982	2.8758	2.96576	3.20916	3.07458	2.97073	2.39245
ADGRV1	15.5391	5.82688	11.2299	14.0485	26.607	17.1082	10.4059	20.056	21.5413	14.2422	9.30085	10.1104
ADH5	69.6593	76.3174	66.5919	76.5609	74.1115	72.4344	69.2682	74.6605	70.8384	78.3971	70.9016	78.0318
ADHFE1	2.61649	1.64293	2.62177	0.996127	1.4062	1.36264	1.60381	2.0683	2.1751	1.85993	1.56565	1.19623
ADI1	175.63	178.283	170.435	179.643	168.645	168.186	150.257	154.084	154.615	164.953	159.764	173.54
ADIPOR1	216.122	217.731	204.344	212.12	198.087	201.801	215.132	200.799	204.067	212.563	232.118	224.292
ADIPOR2	109.893	107.007	94.8466	103.819	101.528	98.6244	108.119	111.513	117.063	120.744	113.048	123.889
ADIRF	51.2699	58.9696	54.2091	62.0281	52.4364	64.6062	25.8194	25.4416	22.7112	23.195	23.2878	26.3449
ADK	58.9583	55.9224	54.8352	47.3717	43.5453	44.9041	59.6176	56.2465	58.4499	68.8553	59.7357	64.804
ADM2	32.984	39.3851	35.8105	39.1166	38.5293	40.1161	43.3214	44.5629	38.8327	39.9226	49.5549	44.0311
ADM5	2.98942	4.07537	4.70767	2.46784	2.16651	1.7493	4.53387	3.38793	3.80197	3.64763	3.56691	3.0969
ADNP	147.526	142.577	140.888	163.823	167.897	159.895	147.368	153.301	155.276	145.958	148.462	143.753
ADNP2	76.9249	68.8733	68.4746	81.8485	81.1846	82.8223	78.8633	76.4468	74.2743	76.0294	76.3156	83.377
ADO	43.6664	40.7768	40.2834	45.034	40.6725	39.5456	46.7722	44.7674	43.5384	48.3734	47.8026	46.4933
ADORA1	3.08165	2.98321	2.41889	3.89881	3.74987	3.73774	3.42884	4.0125	2.99522	3.82616	3.53276	4.18679
ADORA2B	4.76783	6.13055	4.164	4.53791	3.55891	3.47869	5.64099	5.68728	5.63387	6.64213	5.69986	6.89824
ADPGK	41.6182	44.0618	47.1569	42.3558	43.7216	45.7311	46.0667	45.385	43.2839	42.1192	41.3641	39.8032
ADPRHL1	12.0978	13.7379	12.205	9.36588	9.72526	10.5207	12.5774	12.81	12.4338	13.9415	15.2628	15.0832
ADPRHL2	22.0367	24.6872	24.5213	21.2507	19.6868	19.8359	19.6329	18.8762	17.1155	20.5351	18.1054	21.5321
ADPRM	2.32577	1.59969	2.776	2.37964	2.43741	1.73934	3.20762	1.77946	2.49602	2.16359	2.4087	1.87409
ADRA1A	0.719629	1.05037	1.41881	1.8991	1.6054	1.58102	1.29137	1.51072	1.92459	0.83507	0.963479	0.935358
ADRA2A	5.23299	6.35554	5.08933	11.1788	10.2653	11.1762	5.36447	5.05923	5.88347	4.82063	5.37943	6.1805
ADRA2B	1.91876	1.38352	1.65789	1.88157	2.34367	2.22044	1.05077	0.767608	0.998407	0.759605	1.32478	0.677861
ADRB2	5.11771	5.79376	4.3273	4.16413	4.94044	4.75122	10.1129	8.21883	8.87165	8.33837	10.2248	8.19987
ADRM1	92.1122	109.611	102.757	88.6198	71.6736	90.8708	87.7524	80.4613	73.6737	80.3228	87.2267	96.1458
ADSL	77.5568	79.7221	78.5911	71.4816	62.2865	68.2494	81.9596	76.9986	79.3139	80.5119	81.648	89.0381
ADSS	63.8424	61.7828	61.7659	68.9542	66.7945	64.1452	67.1942	63.7813	66.501	72.3475	65.5969	68.2956
ADSSL1	37.4665	38.5625	39.9584	49.3443	47.5936	51.4951	38.3095	36.5967	32.7366	31.8496	35.2114	33.3981
AEBP1	4.65154	4.79908	4.93511	5.92142	5.57793	6.43927	3.87127	3.14021	3.31614	3.30232	3.5729	4.18679
AEBP2	66.2874	54.8883	62.3172	67.8042	64.9588	65.3456	72.1265	68.1017	75.9859	68.8017	79.6426	74.4023
AEN	46.9806	46.4343	42.1026	34.3111	28.3584	27.4964	52.4834	44.3119	42.6819	43.7653	43.6777	46.5332
AES	147.807	178.394	152.6	133.868	115.227	134.625	146.853	132.805	113.885	129.348	147.522	150.854
AFAP1	17.1723	18.4966	16.8744	9.24272	8.2773	8.73987	27.5755	26.5492	26.854	28.4222	26.3176	28.3077
AFAP1-AS1	1.9552	1.7358	1.3784	2.08027	2.04148	1.65052	2.4545	1.67233	1.74444	0.656201	0.391451	0.720751
AFAP1L1	3.48866	2.46439	2.53841	6.86221	5.24981	6.25423	2.75625	2.51219	2.67134	2.38737	2.89047	2.99056
AFAP1L2	4.01196	4.15056	4.39533	2.71168	2.1093	2.81255	2.8758	2.93087	3.42311	3.11253	3.17145	2.79119
AFDN	168.573	153.118	167.683	211.77	252.918	250.719	150.381	163.206	171.939	146.35	148.028	131.778
AFF1	78.7279	62.2828	63.7313	71.4876	87.7348	77.637	69.2922	77.5764	81.3389	75.4289	69.4304	63.2758
AFF3	145.504	128.615	127.956	170.618	175.657	170.944	138.365	145.156	145.659	134.342	131.621	140.147
AFF4	125.827	98.2731	101.363	133.704	164.106	149.473	124.157	141.383	143.631	125.299	115.658	110.651
AFG1L	13.3939	11.6011	11.8057	10.8275	11.0186	11.0599	10.9555	11.1022	12.789	14.9218	12.8477	11.8426
AFG3L1P	57.5362	59.0826	62.9657	48.9605	55.6702	51.5221	51.8138	54.854	57.9358	51.3408	48.0627	40.3277
AFG3L2	119.914	124.652	124.338	109.274	104.861	110.309	118.398	117.997	119.999	122.844	118.568	130.5
AFMID	12.9684	11.6808	13.279	8.99355	6.8213	6.95527	11.8858	11.0645	11.6674	9.60139	11.8735	9.17128
AFTPH	62.854	54.8219	56.0597	65.2463	65.482	58.9896	60.3365	62.2111	65.3243	62.5544	63.5093	57.0201
AGA	6.62845	6.87436	7.94244	8.24572	6.74976	5.88416	7.68724	6.31532	5.66952	6.6426	7.06551	5.58239
AGAP1	50.4651	48.031	43.7509	41.2597	41.1631	42.4091	48.4462	49.839	50.8975	45.2507	44.2612	52.5542
AGAP12P	7.27986	10.8381	13.2524	9.47717	13.7559	9.22182	5.37136	11.9975	9.57562	9.50371	9.72657	6.8476
AGAP2	21.8151	26.6639	23.9223	3.14421	3.74073	2.35727	7.34527	8.23834	8.68211	9.54432	10.9616	9.60423
AGAP2-AS1	5.62896	7.0161	5.72688	2.55586	1.1341	1.49148	6.25948	6.52067	4.11889	4.46209	4.01244	5.22897
AGAP3	109.602	123.738	110.076	98.8933	98.809	110.208	107.234	106.558	91.9604	91.7818	100.322	101.48
AGAP4	23.8424	14.641	15.7881	16.0715	20.5497	21.6327	18.0916	17.5871	19.282	14.6518	19.8315	13.9184
AGAP5	7.38096	5.99593	8.68521	7.72446	9.03914	8.53985	7.73249	8.56643	9.13651	7.89579	5.32388	5.00891
AGAP6	32.2413	34.3474	36.2572	31.5449	30.2038	35.1189	34.9017	32.5197	33.718	27.5464	23.6507	18.0647
AGAP9	5.93365	7.75704	6.93934	10.21	8.68942	10.5198	10.1262	9.80582	9.54632	7.39665	4.98664	5.0207
AGBL3	2.55857	2.81402	2.39578	3.32075	4.73451	3.33696	3.31912	3.01674	2.53961	3.15536	2.08833	2.36276
AGBL5	57.1655	60.004	58.6191	53.4372	49.2317	52.2751	54.9102	53.2615	52.3322	56.3105	59.4354	63.8424
AGER	1.64124	2.81277	0.463004	3.49192	3.29341	3.9346	1.53713	2.90744	3.01731	2.3428	2.6146	0.243036
AGFG1	79.774	69.003	66.5961	76.3144	74.9505	75.4949	86.4952	82.8668	89.607	88.4415	83.1001	86.6068
AGFG2	29.1884	32.2124	29.3034	29.3883	27.7034	32.1289	27.4397	27.4611	25.2914	26.2682	27.8615	28.7603
AGGF1	58.5409	52.3964	58.2644	60.7418	64.3109	61.3376	57.714	59.6378	63.9856	63.5593	64.7613	66.6819
AGK	41.0897	42.2061	40.1835	36.3689	36.9941	31.9409	45.077	40.352	36.4515	44.6186	42.1918	48.1741
AGL	90.0074	68.1815	72.7928	96.3477	112.215	91.6301	85.8869	89.7753	100.625	98.0448	84.4249	88.2416
AGMAT	2.57679	3.12536	2.59212	2.97239	1.80284	2.23934	1.30355	0.976683	0.997851	0.651198	0.504031	1.03259
AGO1	106.522	91.0725	93.7923	102.316	112.438	108.832	86.1964	91.2611	96.9201	88.2845	78.7874	81.0908
AGO2	160.011	130.742	131.165	124.569	151.913	139.74	139.2	159.766	167.019	139.57	116.22	128.554
AGO3	60.6011	52.416	61.9144	52.0711	63.1715	55.0905	53.1278	59.0409	68.0024	48.9857	40.9092	42.7206
AGO4	37.9112	34.0651	34.21	52.6789	59.3025	57.4191	31.5104	33.3512	34.5777	33.3385	32.1528	28.8996
AGPAT1	56.0008	62.2479	38.8268	56.1831	62.1729	51.3426	42.2905	38.6663	57.8543	51.1915	57.1258	57.7157
AGPAT2	26.4557	31.3021	25.0225	39.8451	34.2175	36.7112	18.1397	17.1665	15.6536	16.0182	16.1784	20.4953
AGPAT3	185.417	192.187	175.144	176.029	171.355	175.385	184.328	188.062	175.593	180.679	180.083	194.821
AGPAT4	1.80247	1.46999	1.77355	3.32042	3.46863	3.18263	1.82503	1.57011	1.88984	1.89789	2.16783	1.67472
AGPAT5	62.2725	58.1943	56.291	50.9132	50.8107	49.7748	67.1389	68.1427	70.2094	74.7767	69.0895	69.6204
AGPS	33.7237	24.0417	28.7624	35.4732	38.108	36.2301	37.7172	37.3013	40.3642	38.1475	36.7326	36.8438
AGR2	1.91876	1.77263	2.12055	2.98838	1.59369	1.11022	0.331823	0.209348	0.285259	0	0.56203	0.398742
AGRN	169.641	190.881	165.011	207.598	200.288	233.517	148.51	147.064	131.947	128.764	123.242	133.995
AGTPBP1	21.2808	18.2884	19.779	22.5235	21.843	18.1336	20.573	24.5286	25.9942	22.7746	23.0031	25.2005
AGTRAP	36.1657	43.5376	38.4013	41.948	40.0767	40.9301	31.3573	30.7392	27.7414	30.4421	32.1561	31.9791
AHCTF1	372.426	312.529	337.189	330.598	364.574	342.606	360.957	385.445	418.422	377.941	350.947	343.751
AHCY	212.276	247.601	205.149	257.001	225.226	239.102	228.68	221.872	213.873	233.326	236.652	267.514
AHCYL1	208.098	192.569	192.199	230.493	221.476	222.377	219.612	209.138	215.406	223.078	226.056	235.138
AHCYL2	23.2573	24.1786	22.4983	32.2273	34.5942	32.495	23.1625	24.202	23.8982	25.0338	23.6032	21.9395
AHDC1	25.5253	29.6159	26.719	25.9547	23.8585	27.1634	27.4307	25.8544	23.8904	23.382	22.6418	23.5258
AHI1	25.2099	24.3807	28.8076	28.365	30.4813	26.6264	24.9583	26.2291	32.2022	28.4173	31.0494	24.7518
AHNAK	237.578	222.833	215.834	232.596	377.283	302.461	160.492	211.93	211.484	144.657	141.872	130.429
AHNAK2	12.2042	14.3002	14.333	21.7278	25.8081	23.6531	13.3711	13.735	14.2518	13.0148	9.06935	10.2053
AHR	29.9285	19.2071	26.3078	35.0172	38.8812	34.1155	27.7387	29.9316	34.1558	29.2536	29.8853	29.5344
AHRR	4.30103	4.82807	6.10138	5.06804	3.47768	4.63795	3.47846	2.93928	3.41143	2.2836	1.85963	3.5046
AHSA1	112.381	122.655	119.352	101.614	89.2552	89.493	109.252	110.472	107.066	109.127	115.752	113.104
AHSA2	60.2221	50.4224	60.3074	65.6969	78.7348	77.1408	56.795	62.8641	65.9517	60.0042	50.2017	34.7263
AIDA	101.606	95.9209	92.6366	113.719	115.403	108.104	102.635	95.1836	102.686	111.81	113.116	111.072
AIF1L	116.986	118.68	106.992	102.601	99.9808	95.5158	98.2197	95.1834	98.0221	103.511	99.3588	106.982
AIFM1	109.604	124.455	115.823	99.6972	85.8832	92.2127	113.894	118.131	115.088	117.503	119.597	122.438
AIFM2	2.63391	3.24412	2.76848	2.57283	2.96552	2.19971	2.11262	2.32812	2.63628	2.24959	1.53511	0.896325
AIFM3	7.55876	7.2444	7.38669	5.29412	5.05923	5.8358	4.90334	5.1366	4.3502	4.2569	3.67932	3.72416
AIG1	39.7425	43.2668	42.918	53.8411	48.7163	47.0067	50.5624	49.0881	52.4193	51.6049	50.294	53.935
AIMP1	99.7115	87.1784	98.2781	93.9419	97.3559	85.7282	95.2815	95.7446	102.532	106.475	95.7618	101.443
AIMP2	70.2018	83.8698	67.949	64.1866	50.4535	60.3318	63.9969	67.3339	62.2734	68.3317	66.3779	72.8281
AIP	29.8862	38.825	29.8805	24.4605	20.2493	23.5366	27.8178	25.366	27.5988	29.3034	29.908	32.2184
AJM1	69.7253	82.2646	69.5672	64.9021	62.3843	72.2905	63.8989	57.3615	55.6997	52.9323	61.7391	46.424
AJUBA	28.5641	28.4054	24.7362	34.8682	31.6915	31.7152	29.5812	28.5106	26.4676	26.4745	26.9693	26.9964
AK1	47.8499	56.3903	55.7939	39.1095	36.938	40.3251	45.0909	39.1068	38.1851	39.5121	41.5509	44.0028
AK2	190.233	185.548	181.527	162.645	157.306	157.022	182.282	193.681	198.719	204.044	203.695	196.46
AK3	29.4935	28.4353	28.9749	25.601	29.0878	26.1623	28.7641	29.6382	29.8677	29.0603	30.6011	28.1198
AK4	152.249	140.492	140.799	119.253	130.643	121.412	160.251	171.236	179.868	181.886	165.795	184.302
AK5	16.2804	16.9553	16.8488	4.59325	5.44893	4.69993	4.42431	5.69684	5.82747	6.45282	6.36356	6.91707
AK6	14.4506	13.9632	13.5357	15.2106	12.6877	12.9682	13.6765	14.0649	15.9477	14.5604	16.4021	15.6303
AK7	11.1887	10.5103	11.7311	16.2196	17.2433	15.168	11.5388	10.4477	11.7615	11.0226	11.6781	12.1708
AK9	5.59126	5.26904	6.72291	8.89577	8.85421	7.57241	6.70549	7.65937	6.78121	6.76116	7.67537	6.25479
AKAP1	134.546	139.433	131.898	125.235	125.621	127.897	111.05	110.222	112.499	109.091	115.939	115.436
AKAP10	29.7163	27.3273	24.1985	25.4967	27.8896	23.3715	24.2435	27.861	26.4314	28.459	26.7887	26.6816
AKAP11	82.1967	61.6225	71.4153	91.6506	110.634	95.4722	82.3421	93.5106	102.353	89.1652	74.3779	65.1245
AKAP12	73.6727	66.4212	70.3584	99.5432	111.676	113.217	28.9494	29.476	29.021	22.053	30.0045	26.4288
AKAP13	35.3399	32.47	33.6784	18.1275	27.9442	24.0296	36.0043	44.3808	44.1572	34.0526	30.9232	33.7939
AKAP17A	44.1315	48.034	43.1436	42.3354	41.7173	45.1859	49.331	44.6259	44.857	47.9027	48.0134	42.1869
AKAP2	5.23299	6.39877	7.13277	13.3924	13.312	12.2494	3.87127	3.79524	3.851	2.84683	3.25174	3.15006
AKAP3	0.872164	1.16734	1.31089	1.66021	1.4062	1.22124	1.99094	1.74456	2.10379	1.89789	2.08754	2.4722
AKAP5	15.1274	11.4988	12.9016	13.7959	14.7952	12.9724	15.2602	15.7908	16.4701	16.0138	13.9774	14.7801
AKAP6	14.3117	11.6369	13.2432	11.9892	12.1863	10.2201	13.6272	15.7002	16.6598	15.4609	13.0371	12.3567
AKAP7	1.42733	1.46945	2.4363	2.59429	2.38634	2.19213	1.4932	1.77803	2.29618	2.21289	2.61309	2.42597
AKAP8	51.225	53.1907	53.745	50.978	47.3923	53.7889	52.499	47.2172	50.2766	45.0558	50.1766	47.6965
AKAP8L	64.4611	64.5577	68.4076	61.7062	56.2996	62.493	62.2873	59.7684	58.1392	55.7411	64.3894	53.1966
AKAP9	854.949	763.128	913.859	1131.3	1320.94	1189.31	985.54	1085.32	1231.78	1028.3	1023.21	877.054
AKIP1	13.7047	12.6898	14.2182	13.1379	12.0632	12.1912	14.0144	12.8292	12.3916	13.4574	12.4824	14.2899
AKIRIN1	68.5311	61.456	58.9195	73.2144	76.4655	72.6126	69.7393	71.0599	67.7086	69.6087	76.5355	72.2576
AKIRIN2	24.2462	24.9466	22.7478	22.1915	20.6243	20.095	27.5966	23.2725	23.5695	25.3937	25.6125	27.7923
AKNA	15.3362	17.0536	17.142	15.0391	12.4566	14.8935	18.2865	15.7753	16.4182	17.1253	17.8099	16.6107
AKR1A1	39.9218	44.5804	45.4635	41.465	37.0874	39.4932	45.2991	40.8951	38.8969	45.6448	39.2527	40.1802
AKR1C1	3.29775	2.43511	3.00135	5.63826	4.71783	4.43195	3.31666	3.40689	2.43289	3.19549	3.40122	2.87736
AKR1C2	6.0292	6.34919	7.89775	12.5148	12.1225	13.0494	7.74657	6.65364	5.44091	7.75293	8.76006	9.08352
AKR1C3	18.8876	21.3405	19.1078	53.5089	49.4748	47.1737	51.4644	51.9547	49.52	59.6603	56.0982	65.3799
AKR1E2	1.39546	1.90234	1.50366	1.77089	1.31245	2.14642	2.26746	2.4075	1.85418	2.23951	2.04739	1.2361
AKR7A2	38.0968	44.8483	39.0138	35.3504	31.7247	39.7323	37.2139	33.704	31.9451	33.0755	35.5828	37.5138
AKR7A3	3.01354	2.10893	2.82244	2.09516	2.61388	2.51661	2.43298	1.99211	1.85886	1.64768	1.7304	1.06104
AKR7L	2.16446	3.56419	3.70511	2.73705	3.22227	3.31816	2.91954	3.09524	3.30897	2.49887	2.24138	2.30884
AKT1	225.71	242.604	213.273	218.102	196.256	227.341	219.622	204.23	191.335	203.095	209.265	213.968
AKT1S1	132.574	158.671	145.012	119.717	102.622	120.594	126.635	121.863	113.809	116.518	139.994	133.974
AKT2	194.649	210.502	181.554	159.263	153.1	165.421	182.058	178.087	168.662	170.182	175.764	172.731
AKTIP	35.2102	37.2699	36.9495	62.7427	63.4111	59.275	36.4391	36.4805	36.1789	38.7721	39.1782	40.7917
ALAD	40.5425	41.4191	41.1804	44.9282	43.7797	44.0042	39.3763	36.7056	36.0496	39.1344	38.9433	35.968
ALAS1	64.4239	73.9318	65.3901	62.9774	59.9041	63.0604	60.3918	62.8392	61.1168	62.9719	67.7246	67.3076
ALB	28.0837	30.0915	25.7551	9.68457	9.09343	9.84394	47.7272	45.4633	43.8942	26.8741	26.295	29.4272
ALCAM	300.257	254.092	274.13	361.484	367.44	346.018	291.562	296.925	315.14	313.721	313.452	304.878
ALDH16A1	50.7008	66.3461	53.349	55.5716	49.5269	52.8501	45.2584	45.279	42.7841	42.4706	43.3664	45.5379
ALDH18A1	143.616	144.189	131.744	127.67	116.433	121.347	146.942	143.333	140.062	150.123	141.912	160.215
ALDH1A1	6.86103	7.13377	5.89899	11.7322	9.65591	8.25263	4.59022	3.34956	4.13626	3.75782	3.29189	2.83107
ALDH1B1	43.4628	46.5488	42.4038	36.7009	36.7854	37.2601	45.9573	44.5626	43.6282	44.8771	43.3021	50.9317
ALDH1L1	2.52165	2.10209	2.60098	2.19821	2.01238	2.5273	3.03976	3.03896	2.06116	2.67307	2.52575	2.38765
ALDH1L2	119.791	101.482	104.342	68.011	74.3945	71.1504	130.345	139.001	151.836	139.229	146.328	131.159
ALDH2	13.8451	15.0456	14.6543	16.6712	16.5921	17.5445	20.1502	20.2714	19.9053	18.5062	20.0677	19.394
ALDH3A2	1241.06	1202.43	1205.71	1209.91	1194.7	1156.4	1257.77	1265.54	1269.05	1309.59	1329.54	1322.54
ALDH3B1	12.2566	12.1652	14.6636	6.61831	6.887	5.94082	7.6126	6.59449	7.6237	7.23128	6.76559	6.95796
ALDH3B2	3.73698	3.25853	2.99302	3.56439	2.86305	3.766	1.9919	2.80874	1.56892	2.89692	2.39545	2.04548
ALDH4A1	51.0507	60.3728	51.5913	47.2944	43.2797	44.6308	54.7898	48.1424	47.1167	49.2209	48.8463	53.2418
ALDH5A1	55.9601	51.1968	51.2016	69.4863	70.4668	69.7707	49.8552	49.7169	51.6069	52.7882	51.3163	54.7762
ALDH6A1	192.397	195.731	185.149	208.915	210.073	197.912	221.803	215.005	218.92	224.355	228.004	231.059
ALDH7A1	107.089	109.133	104.205	123.315	116.466	113.48	121.996	120.54	125.476	123.282	131.277	134.104
ALDH9A1	169.723	172.637	164.054	202.712	199.259	184.814	164.031	164.931	170.941	179.312	171.74	191.795
ALDOA	664.702	778.637	689.925	676.444	610.55	685.322	646.412	611.977	569.996	622.972	634.553	698.489
ALDOC	28.2934	34.7652	30.122	31.8225	33.1034	33.2742	29.5066	32.2099	30.307	31.9601	39.5165	37.3161
ALG1	31.3197	38.1527	31.3021	32.3245	27.2299	30.235	37.2803	37.2105	31.3934	36.5526	30.2406	35.3034
ALG10	34.4978	20.4281	28.5859	27.5088	32.3386	30.5367	32.0956	35.0501	38.8043	37.7742	35.2238	32.3737
ALG10B	121.276	86.6496	95.361	121.31	132.432	120.822	130.578	151.943	151.041	141.625	127.51	111.834
ALG11	27.4224	23.4324	25.0698	32.7749	33.5982	33.2669	25.1355	30.3094	35.5035	30.0282	27.8115	26.6018
ALG12	48.0176	50.9829	48.955	42.188	40.9019	42.9533	53.7824	51.991	47.7794	52.1898	47.3738	51.8565
ALG13	34.9057	28.6623	33.9612	31.1302	35.3486	32.508	35.825	36.4617	37.2395	35.9208	32.8001	32.6991
ALG14	7.74018	7.97431	8.96772	6.6855	6.10803	7.01017	8.50497	8.40467	7.4885	7.00642	7.05014	8.5412
ALG1L9P	3.14373	3.15511	3.05967	2.96572	2.33199	2.60138	3.07615	3.19396	3.07906	2.13863	2.28734	1.82224
ALG2	31.6305	33.7233	31.8854	33.4256	31.827	29.3098	39.5423	37.8221	37.262	39.3242	36.0502	41.3097
ALG3	59.3653	63.5986	62.4985	47.9248	44.2484	48.3685	62.9911	55.1282	55.3046	56.2154	63.5896	58.9739
ALG5	34.8233	32.3498	31.46	30.2256	29.1146	31.9014	36.9836	37.3805	41.4348	43.9548	41.6	44.4386
ALG6	20.1179	16.9049	18.0825	20.3653	20.0149	20.169	24.4996	25.1915	25.5307	26.6843	24.7293	23.8049
ALG8	46.1727	47.0832	47.3847	49.6957	40.5454	45.1214	57.5713	54.7822	53.2008	56.8418	54.7711	55.5055
ALG9	35.3837	32.3876	34.7377	33.7401	32.6961	33.1384	34.7479	35.7152	37.2068	42.4655	37.4283	36.2674
ALKBH1	10.5241	10.2899	10.063	11.0681	10.0309	9.58489	9.18044	9.2113	10.412	9.48944	10.5983	11.0452
ALKBH2	38.6734	40.9441	40.0792	32.8808	30.4718	30.9878	38.3261	37.9273	37.7025	38.5402	40.7116	38.56
ALKBH3	14.7686	13.2299	13.3017	11.1788	11.4371	9.10379	11.6138	14.3752	13.5692	13.9305	14.131	14.5214
ALKBH4	17.6651	21.98	20.6879	15.5704	15.5105	19.7446	19.2486	17.0009	18.2833	17.3361	16.304	19.6972
ALKBH5	76.4724	88.4239	80.5063	84.4547	72.4165	78.5675	79.4418	77.5365	66.8133	75.9955	87.869	86.1881
ALKBH6	26.0343	30.3677	33.8426	29.8326	32.2186	31.0541	25.1042	25.5509	22.9445	24.7153	23.1569	22.7275
ALKBH7	17.5596	23.0442	20.9356	21.7488	19.3587	24.4618	19.4117	18.2132	16.0815	15.8284	18.266	20.296
ALKBH8	26.7464	24.471	26.7961	27.8916	30.5614	29.7909	28.9239	29.6925	31.5568	31.2772	33.6013	28.829
ALMS1	43.2857	37.2479	37.316	43.0863	56.5797	48.0128	37.0547	41.8112	46.0889	36.0562	34.2065	33.671
ALMS1-IT1	1.16289	1.25381	0.925332	1.16215	1.08409	0.979074	0.843102	1.10197	1.03406	0.83507	1.20435	0.518365
ALOX12	2.202	2.58293	2.25624	2.34328	2.52781	3.34352	2.63923	2.87955	1.99864	2.15671	2.36802	1.4479
ALOX12-AS1	6.13169	4.7116	6.05508	4.64034	5.59721	5.79993	4.30491	6.15795	5.00696	4.80676	4.50672	3.47772
ALOX12B	3.93122	7.55162	4.6313	4.15338	4.44244	4.25917	5.93102	4.91333	5.18462	4.46968	4.49092	3.98994
ALOX15	7.43656	10.208	9.6938	1.03643	0.560759	0.585578	3.09621	3.89331	3.86508	3.92873	3.82929	3.56799
ALOX15B	11.6679	13.7758	13.6484	14.7082	15.2473	15.7758	6.93646	5.96145	6.15882	7.00702	6.94083	8.05308
ALOXE3	9.7101	11.9328	10.9498	5.14666	6.65601	7.51248	10.6736	9.28108	9.48486	9.14782	10.5581	10.4072
ALPK1	12.457	13.0009	13.5462	14.9415	17.496	15.4825	14.1808	12.8512	14.5931	15.4896	15.7288	15.1839
ALPK3	9.88453	9.03611	8.94488	1.16215	1.45307	2.14642	12.2222	13.6425	13.1932	10.3245	9.03262	10.8059
ALPL	12.501	15.0458	14.4583	21.9701	20.2962	21.6123	14.4896	14.6543	14.6552	15.0692	22.4812	18.3023
ALS2	22.8836	21.9787	22.2193	30.9783	30.2071	29.0069	21.7376	25.5124	25.7727	24.6092	21.1698	25.1614
ALS2CL	2.79188	2.64069	3.49322	5.26022	4.84042	5.11036	2.55149	2.20992	3.21356	3.34244	2.41096	2.03635
ALX4	2.61649	3.19939	2.69889	2.65634	2.85927	2.84956	6.19403	5.44304	5.70518	4.51697	4.57653	7.13748
ALYREF	150.652	176.917	157.152	123.575	105.184	122.975	146.334	138.486	132.218	138.166	150.221	160.57
AMACR	13.102	14.2985	14.1637	11.792	11.9156	11.3737	5.9043	8.47895	9.00475	10.8865	10.2931	11.1454
AMBP	5.98886	7.65259	7.44121	16.7128	13.9683	15.9501	8.40619	7.22249	7.52371	6.33894	7.46696	8.21409
AMBRA1	46.3991	50.4552	45.3413	43.7189	44.1547	49.9968	43.856	42.1138	42.6462	40.8425	44.4003	45.8952
AMD1	514.293	449.987	457.95	543.882	525.881	503.248	534.574	563.108	552.892	595.178	525.972	581.887
AMDHD1	3.01485	3.29536	1.77373	4.51796	3.6429	5.31792	2.88066	3.01756	3.18805	3.04235	2.20636	2.43587
AMDHD2	25.8788	31.3642	25.5984	26.8532	22.6596	25.8078	20.9761	23.1793	21.3711	17.8096	18.74	16.5145
AMER1	16.0564	15.5581	14.3775	15.177	16.3165	17.544	15.073	16.5783	14.5122	14.6138	14.8331	16.7124
AMER3	23.374	20.6658	19.5592	6.32476	4.31241	6.25126	9.69448	9.4883	10.4448	7.63456	9.15497	8.44165
AMFR	84.7638	88.8762	80.2023	97.7766	91.9143	94.9505	88.5247	83.1204	76.5018	82.6613	84.4259	92.1497
AMH	34.3051	36.4038	37.476	26.0653	29.6239	33.3066	32.6293	34.1586	27.0283	28.0508	25.6928	22.5289
AMHR2	3.08165	2.89674	3.23866	4.86996	4.07798	4.14482	2.76519	2.26793	2.1751	2.31542	2.85029	3.03044
AMIGO1	7.15175	7.82553	6.20744	10.6254	10.4528	9.88095	9.84409	8.12967	7.77331	7.3638	9.1932	8.6527
AMIGO2	7.73319	7.14378	7.80193	4.38724	4.07798	3.96498	6.91806	6.02658	5.95478	5.88345	5.79032	6.0453
AMMECR1	49.5971	43.6673	46.7678	43.4422	44.9047	44.7048	50.9349	51.988	54.0923	55.8738	48.8163	53.3916
AMMECR1L	19.3111	18.2602	19.1329	21.4921	19.3675	18.6941	21.3024	17.969	18.6488	19.9704	20.2786	19.9371
AMN	4.53408	4.05437	5.0746	1.17942	0.917697	1.17582	1.15223	0.927325	1.3064	0.634266	0.979007	0.760794
AMN1	8.55151	7.86469	8.05157	6.939	7.03932	7.04133	7.45488	9.58349	8.94965	8.59163	10.5088	9.49041
AMOT	60.1212	53.9572	56.2139	50.1384	58.6385	56.6212	62.4381	62.6996	59.0843	54.9249	56.765	51.677
AMOTL1	37.1669	34.2752	35.7862	34.1749	37.7475	38.4739	31.1812	35.1174	35.864	26.4697	30.3711	30.3306
AMOTL2	3.31422	3.97762	3.47	7.32682	8.29658	8.58569	1.4932	1.96116	1.60458	1.7081	2.72986	1.47535
AMPD2	42.0851	53.2655	46.8265	45.8775	47.2539	52.3937	44.2986	46.9365	40.1525	42.9627	42.1076	39.9225
AMPD3	4.24833	3.63485	4.72186	9.41373	9.281	9.92141	3.76524	3.34956	3.67743	2.50521	3.05405	3.98781
AMT	5.18063	6.6708	5.34875	5.94815	5.48802	7.52415	5.83962	5.00345	4.26409	4.17199	6.18922	3.25536
AMY2B	10.0118	7.20226	9.90783	12.6223	12.0516	12.6429	7.96257	7.33759	8.77242	6.29566	7.10156	5.91183
AMZ1	1.04745	1.14831	1.68105	0.499876	0.423751	0.742529	1.54851	2.31377	2.03247	1.59423	1.05245	1.35572
AMZ2	37.4637	44.0087	41.9328	41.6464	39.6237	38.1254	46.6993	48.4061	47.6281	48.0002	51.0896	47.8426
AMZ2P1	3.60567	3.55539	3.44551	4.99982	4.97296	4.28628	4.00255	4.85174	3.95887	4.77529	5.01921	4.52195
ANAPC1	103.255	94.2456	93.8244	91.2113	96.5455	91.109	103.711	106.598	113.521	108.319	100.747	102.607
ANAPC10	8.06071	8.1355	8.76554	8.70153	9.42339	9.47596	10.2769	8.49266	10.3428	11.2338	9.81007	8.83496
ANAPC11	59.656	66.7338	64.1616	58.1424	51.5235	55.8067	59.1106	49.738	47.4297	50.7048	47.0098	57.0795
ANAPC13	44.136	45.5281	44.1777	42.8307	43.1385	40.3655	50.828	49.4591	54.093	53.6688	51.0144	56.6279
ANAPC15	25.7107	29.2909	29.1727	18.5202	19.1478	19.4784	29.2153	25.3853	25.402	24.8142	27.99	26.8762
ANAPC16	80.9826	85.6184	86.1342	73.7765	71.9799	73.6059	90.6753	86.4722	90.6889	90.8659	90.9625	87.4926
ANAPC2	65.1216	75.6612	73.4097	84.3941	79.4972	88.5584	60.5024	57.0123	50.5622	51.9641	52.9914	50.8396
ANAPC4	28.2655	23.9089	28.4656	32.0498	34.409	28.2761	26.3799	27.8781	30.4526	30.1026	26.458	23.7277
ANAPC5	296.049	307.209	293.968	272.127	266.034	268.359	305.947	302.896	285.27	309.058	277.714	297.193
ANAPC7	146.244	149.732	149.08	154.745	150.074	148.962	151.23	143.115	146.426	154.295	146.842	148.616
ANG	23.0147	25.9937	22.6954	26.4065	24.2583	25.172	24.841	24.4047	25.9519	25.02	30.2008	29.9671
ANGEL1	25.081	24.4067	26.9054	26.0982	32.5247	30.4006	19.9457	20.8991	19.3495	18.5184	20.0606	22.6749
ANGEL2	98.8848	80.93	89.9707	87.9495	98.1157	90.8791	95.962	96.9321	103.399	92.0948	93.7814	90.8755
ANGPTL4	42.9554	48.5637	42.5393	51.5774	44.5776	52.4788	43.5194	37.4491	38.8666	45.1919	49.6569	50.9593
ANK1	6.80288	5.66378	5.87283	1.27283	0.84372	0.925182	8.82319	8.89728	9.48486	7.91172	7.93293	8.41346
ANK2	13.7802	11.2843	10.2558	12.5623	12.937	13.1006	12.9964	13.0493	12.8367	11.3873	10.9997	12.0021
ANK3	42.7024	37.509	37.0455	58.0156	65.9508	64.3438	51.556	58.4955	61.5786	54.7356	57.2826	51.6937
ANKAR	3.37237	3.24262	2.89166	2.54566	3.32801	3.58971	3.98188	3.31467	5.24164	4.02352	3.77363	3.22981
ANKDD1A	4.52063	5.21033	5.20795	4.40408	4.26824	4.31158	3.41404	5.102	4.27035	4.70597	3.97126	4.27256
ANKEF1	20.915	17.8252	18.7524	21.7722	23.4017	23.6637	19.0165	15.4509	18.4241	16.7991	15.5878	17.5511
ANKFY1	85.2415	78.4677	78.0647	84.6285	87.1724	86.4485	80.7328	84.3598	86.8965	84.2805	74.6778	78.2347
ANKH	35.5171	35.9439	35.2712	28.6053	30.4215	26.8598	39.4154	39.2228	36.0164	38.6424	33.6117	36.4004
ANKHD1	138.923	123.308	142.21	150.218	161.512	149.668	121.43	143.869	154.839	132.298	140.178	129.899
ANKHD1-EIF4EBP3	60.1846	59.9708	55.0694	36.3867	56.2289	49.8272	72.0018	64.6447	63.4531	56.298	45.6988	41.226
ANKIB1	118.963	99.6566	104.678	122.69	132.839	127.712	121.613	131.087	139.064	128.335	128.624	128.873
ANKLE1	5.1105	4.27505	4.72149	2.14842	2.73812	2.41468	4.46506	4.95324	4.29866	3.86486	4.14824	3.20094
ANKLE2	154.367	149.324	150.068	154.733	149.494	151.136	155.192	159.435	155.512	155.644	154.761	155.11
ANKMY1	19.9905	20.5208	20.8776	20.2964	19.6505	22.2732	18.779	19.0181	17.9916	16.5729	17.25	14.5812
ANKMY2	11.9196	11.3708	13.7643	14.6652	12.1871	12.3234	15.0426	14.8288	14.2986	15.5247	14.8938	13.5174
ANKRA2	12.3444	11.6099	11.5454	14.3971	15.2854	13.797	14.8635	13.3563	14.0592	15.4274	16.0717	14.9716
ANKRD10	25.9324	23.0518	27.7214	25.1509	31.6864	29.3602	33.68	34.5075	31.1073	27.984	28.4727	23.9448
ANKRD11	236.653	262.506	277.714	208.707	221.916	232.762	232.715	242.411	236.024	206.538	230.109	225.234
ANKRD12	75.9493	71.3118	89.935	83.687	97.6212	85.831	70.1917	73.0549	81.5336	68.3205	64.9273	67.8415
ANKRD13A	59.8514	58.0427	57.9564	77.886	77.3504	79.5815	50.1479	54.4858	58.0378	56.0872	55.3054	56.2556
ANKRD13B	65.8775	74.0183	70.3638	43.3315	38.8111	40.819	55.5251	56.2796	51.1327	49.7626	54.6373	51.677
ANKRD13C	38.6078	33.6368	35.8952	36.58	40.0298	38.4876	40.5377	41.1019	45.2136	43.082	45.5645	42.6654
ANKRD13D	39.9925	43.3008	42.5523	41.3634	42.3181	47.6733	36.1409	35.1056	34.5247	32.2706	33.5956	31.8033
ANKRD16	18.2448	19.8481	19.4304	12.8047	11.7206	13.6992	16.5059	18.0471	17.5404	17.8921	20.341	17.4102
ANKRD17	206.23	185.305	204.588	174.867	212.293	195.547	199.094	220.943	218.188	191.079	196.59	175.079
ANKRD18A	12.9398	13.8369	21.2853	10.7942	12.6085	10.1456	14.5147	15.4112	16.5981	12.3279	13.6549	10.3544
ANKRD18B	35.6478	38.0218	50.6296	23.9156	29.9521	23.4754	32.2942	37.1195	39.0305	34.0921	27.2981	29.1867
ANKRD20A1	1.97028	2.29553	4.43831	4.14582	1.26374	5.47179	2.80891	1.63022	1.66806	1.54246	1.5715	3.83205
ANKRD20A11P	3.39329	5.50764	6.32281	7.28923	7.54044	7.08747	2.59102	2.89931	3.32333	2.70636	2.0907	1.77782
ANKRD20A2	1.24337	1.5006	2.24451	0.725335	5.16175	1.50425	0.262443	2.15125	3.42141	1.6773	3.25894	1.28955
ANKRD20A3	6.11236	6.30492	7.39652	9.11453	7.74973	8.94359	6.87049	8.27634	8.73438	7.75889	6.51738	6.30263
ANKRD20A4	2.88374	4.01549	4.02871	2.83107	3.60026	0.895504	2.63741	4.00775	2.54408	2.47739	3.3499	1.51752
ANKRD22	2.95759	2.34192	2.40191	2.98949	2.48797	2.36592	1.60381	1.88889	1.92846	2.05368	1.96986	1.95394
ANKRD23	4.27721	4.16748	5.12432	3.72786	3.19686	3.8956	2.47576	3.25752	3.95974	3.68227	3.01898	1.90873
ANKRD24	24.7695	27.1083	28.2997	3.76315	4.26547	3.95978	27.2095	26.6918	22.5711	22.2432	25.211	23.2068
ANKRD26	24.6532	26.8921	37.2061	28.6663	32.3895	25.8681	26.214	28.0875	32.2699	27.8989	27.4592	22.3296
ANKRD27	66.6636	71.4674	64.5419	60.4317	55.4043	53.9951	69.3931	64.5369	65.3956	66.4289	61.4294	66.9825
ANKRD28	77.574	67.4466	71.6508	78.307	81.4193	79.1218	77.2653	80.2501	82.7308	79.8889	78.6843	78.4327
ANKRD29	1.53326	0.844406	1.51735	4.69632	3.95533	4.28943	0.628549	0.953573	1.0029	0.465243	0.621366	0.679391
ANKRD30A	20.5249	16.4293	22.7312	63.8505	71.7974	64.6803	10.8949	10.989	11.4807	8.19409	9.83552	6.45962
ANKRD30B	3.34307	2.51336	2.35033	10.1756	11.8418	10.501	1.77281	1.95282	2.76422	1.8387	1.74162	1.58122
ANKRD31	2.09319	0.994404	1.15667	0.664085	1.07809	1.11022	1.71442	1.57011	2.28207	2.20155	2.44884	1.47535
ANKRD34A	6.68659	7.0473	6.36166	15.5507	14.8611	15.247	12.671	9.45554	10.8398	10.6073	12.6858	10.0882
ANKRD36	12.3759	13.3799	21.1442	17.3104	16.6376	17.0796	16.288	19.5768	19.9552	12.3716	14.7506	10.9406
ANKRD36B	15.8536	16.067	21.4256	13.3403	19.8345	17.0535	15.2836	17.3244	20.967	17.9196	17.7153	11.4623
ANKRD36BP1	2.95522	0.462713	0.450762	1.07973	3.78967	2.00423	2.85541	0.850937	2.08513	2.53521	1.28009	2.52366
ANKRD36BP2	3.7254	3.93698	4.08744	3.99303	5.1872	5.74003	4.54746	5.86103	6.34393	5.35737	6.27065	3.31214
ANKRD36C	11.6845	11.8119	18.2874	10.3254	16.0334	10.7608	10.6288	12.9576	15.7384	9.32884	8.86009	6.9989
ANKRD37	0.784252	1.60658	1.54013	1.32387	1.12466	1.76024	0.941524	1.90598	0.802099	1.37245	2.21758	1.67991
ANKRD39	19.0177	17.341	16.5879	13.419	13.3789	14.9446	17.6191	17.5847	15.5614	18.7594	12.2419	15.7445
ANKRD40	92.884	88.277	80.0722	89.2826	87.2031	88.1251	95.537	91.1802	89.6758	96.532	89.9365	90.1682
ANKRD42	16.5323	14.6056	14.5312	18.8594	23.0139	21.2478	14.3006	13.0694	14.5972	12.7644	12.7833	13.0025
ANKRD44	1.21399	1.0187	1.72062	0.572149	1.29419	1.43898	1.11113	1.61434	1.43948	1.38116	1.53727	1.15094
ANKRD46	17.3162	14.7392	16.7623	12.6411	11.7259	12.5384	15.6726	15.237	16.1944	16.5871	15.1919	17.2407
ANKRD49	15.5959	11.7753	12.8291	16.1594	17.0097	15.836	16.0934	12.8819	15.089	15.4196	13.1408	14.9172
ANKRD50	44.5385	38.3494	39.5965	53.5142	58.2167	55.5109	50.1053	54.2908	57.7293	52.1919	46.8893	50.6402
ANKRD52	245.601	246.612	229.675	254.345	247.772	260.457	226.359	225.712	225.355	215.144	205.582	211.573
ANKRD54	36.6813	42.8261	39.8289	40.1376	36.1219	40.0192	38.6745	39.435	36.3964	39.1853	38.6137	36.2828
ANKRD6	9.76544	8.49697	7.17262	7.45888	8.54908	9.3728	8.92187	9.0476	9.15976	8.1101	10.2974	10.1325
ANKRD61	1.16289	0.994404	1.00244	1.21749	1.03121	0.96219	1.21668	0.802499	1.60458	1.02486	0.762754	0.518365
ANKRD62	7.96444	7.95553	11.3654	5.97656	5.29093	4.63554	7.53253	7.70702	9.0516	7.44443	6.92249	5.37976
ANKRD9	56.0145	67.4004	57.6431	64.3524	59.8341	64.005	58.4174	55.7407	52.1203	54.2373	54.3726	55.7357
ANKS1A	60.5282	60.8748	52.3969	54.7317	51.2326	50.663	52.9258	57.9195	53.0582	51.9262	51.4658	55.9036
ANKS1B	3.12161	2.82785	2.86403	3.66911	4.22891	3.05673	3.50958	3.90666	4.16257	3.34944	3.19187	3.52096
ANKS3	24.0688	25.5582	27.9005	20.2239	19.7739	20.0957	25.1886	22.1658	24.2462	20.7052	18.5675	18.9127
ANKS6	22.7344	22.1795	21.7068	19.9225	20.2962	20.8721	19.3564	20.0276	19.8255	18.5993	19.4302	18.9801
ANKZF1	59.7333	57.6509	64.239	55.2207	61.6729	61.8568	67.3246	67.5295	67.0935	60.6581	73.3872	50.6684
ANLN	216.468	199.224	204.676	215.993	216.133	202.8	230.931	230.457	244.964	251.173	237.172	236.777
ANO1	0.551737	0.907934	0.712164	0.676646	0.306804	0.60563	6.51332	7.12893	6.17455	5.30182	6.84757	6.71366
ANO10	5.38852	5.75758	5.16771	8.10571	7.22111	7.09411	5.53039	5.09538	4.81406	6.96964	5.3479	6.82241
ANO5	1.10474	1.29705	1.27233	2.49032	3.09364	2.44248	1.32729	1.04674	1.10538	0.645282	0.762754	0.47849
ANO6	62.0991	56.9422	56.741	63.0327	70.1724	64.9848	76.1534	70.6597	72.3187	76.4863	75.0021	75.2516
ANO7	8.20353	8.86616	9.35372	7.5263	7.2389	7.68059	6.19403	6.28043	5.13466	4.86465	4.10863	4.06753
ANO8	49.0686	54.2722	48.2877	43.7257	40.6997	46.197	42.3209	42.1359	39.485	36.7851	42.61	38.603
ANO9	45.4107	43.6241	42.5267	40.0111	42.936	46.1851	35.8369	38.3455	35.0869	31.1253	31.7547	24.2435
ANP32A	129.692	131.499	131.356	110.536	100.484	102.619	133.071	130.334	138.109	136.142	151.522	144.612
ANP32B	246.913	270.112	293.161	255.341	259.179	243.775	247.153	235.923	254.662	265.128	282.922	282.187
ANP32E	288.919	254.74	295.721	287.549	286.068	271.078	307.379	312.277	336.32	340.898	356.407	340.326
ANTXR1	40.0614	36.1444	34.0212	82.7893	79.3097	77.7523	50.5931	45.6029	46.5869	49.0034	52.2128	51.9162
ANTXR2	9.35901	9.2799	9.49085	6.94011	8.04069	7.79955	9.24121	10.4971	9.60334	11.1206	10.4953	10.0617
ANXA11	90.8083	104.831	95.9244	112.789	109.383	111.909	86.9355	89.1827	87.9183	89.1532	91.3823	101.257
ANXA2R	2.76099	3.09357	3.30879	4.6266	4.31235	3.73774	3.89776	4.06545	3.06654	4.6688	3.93421	3.84735
ANXA4	62.6036	63.5707	58.5963	47.7023	49.4887	49.2562	73.5583	78.4773	73.3714	79.9868	80.3507	80.587
ANXA5	127.801	127.068	126.809	154.953	150.979	151.878	137.209	135.029	136.283	150.844	152.992	156.506
ANXA6	115.3	127.197	116.245	71.8872	67.2164	75.1988	153.026	140.193	141.916	159.802	167.726	166.754
ANXA7	80.1163	80.8391	79.5384	92.9384	88.9647	88.9811	77.6587	80.5163	74.564	84.7255	81.4541	91.91
ANXA9	5.34927	7.86876	7.82677	3.04372	3.5155	3.84876	5.7516	6.0013	6.88188	5.61775	7.5874	6.41975
AOC1	0.872177	0.778483	0.501222	2.601	1.35933	2.07241	1.60381	1.11654	0.570518	0.911008	1.08392	0.956981
AOC2	9.24494	6.09613	8.63643	7.41561	7.31224	6.36525	6.52586	7.95521	6.73925	5.50387	5.78088	4.42604
AOC3	4.41897	4.15056	3.65499	2.93304	2.62345	3.90746	2.1979	3.35668	3.6152	1.93167	2.89044	1.43547
AOX1	3.5468	3.32909	2.19766	8.90981	8.95281	9.69591	2.10155	2.65174	2.6743	1.89789	2.93058	2.67157
AP1AR	57.214	49.5473	52.2813	56.8346	55.4043	53.9566	60.5577	59.1407	60.368	63.5033	59.7357	62.2835
AP1B1	180.712	214.1	184.411	176.259	169.916	180.633	177.913	173.061	165.272	168.646	181.255	189.801
AP1G1	172.347	157.771	156.355	194.652	190.655	186.781	175.931	180.952	190.988	183.639	170.156	178.407
AP1G2	75.3743	80.0649	80.5887	88.7862	81.6371	93.354	72.9578	73.3262	68.8888	64.9777	71.2605	57.864
AP1M1	41.4106	46.2657	43.7491	40.5088	35.3766	40.4694	39.9135	38.746	40.6486	39.2293	38.3041	41.9597
AP1M2	139.43	152.49	143.284	151.522	141.089	139.74	131.159	134.227	124.94	132.009	134.566	149.329
AP1S1	113.149	121.144	116.283	85.7776	75.6067	77.3822	100.1	93.3691	90.2845	89.7701	92.6546	105.148
AP1S2	10.2334	8.34435	9.58916	13.212	14.3203	12.3482	9.57897	10.7413	8.45213	10.6789	10.2756	8.30588
AP1S3	17.1029	14.2788	16.4727	17.2565	15.9134	15.5554	14.6917	13.1256	16.1914	15.8074	14.7226	15.1253
AP2A1	126.629	143.852	134.311	143.266	123.453	138.715	129.334	112.874	104.412	112.393	116.431	126.772
AP2A2	41.2231	48.3896	47.6415	38.2551	35.6521	34.6486	46.6972	42.4454	43.6015	43.8015	43.9663	42.0339
AP2B1	261.959	255.775	246.756	343.437	353.323	344.409	257.227	261.894	265.632	260.071	259.48	273.892
AP2M1	305.199	340.129	321.784	346.652	313.817	325.257	302.236	288.446	271.888	292.806	312.087	318.395
AP2S1	98.4964	124.56	111.04	109.74	90.6061	99.9937	99.1598	93.8226	84.1158	92.2373	87.7569	105.348
AP3B1	39.073	38.6953	41.3196	46.2092	46.6728	43.5946	41.6991	42.4278	46.9718	46.5451	46.6083	48.0085
AP3B2	7.65037	9.17682	8.1304	0.557289	0.472734	0.603662	1.82667	1.56145	1.56857	1.27435	1.30495	1.04391
AP3D1	323.864	341.037	338.363	298.838	284.052	314.118	330.606	315.94	307.83	313.835	345.608	337.096
AP3M1	116.776	109.034	111.808	117.799	125.288	116.802	114.405	114.555	123.378	128.409	123.059	120.904
AP3M2	46.5154	41.8082	45.456	41.2286	40.4517	37.9325	40.6477	38.7991	38.1177	38.6789	37.2545	38.1197
AP3S1	73.2985	74.9462	72.0037	76.6273	74.7204	76.4918	74.4631	72.973	66.8679	76.3022	72.6507	78.1773
AP3S2	39.4467	42.5684	39.4979	27.8196	25.0269	23.6608	46.6168	50.1524	45.8493	49.7148	41.5668	51.8227
AP4B1	19.9917	23.3518	19.2764	17.7701	19.2103	18.1564	20.5241	22.3407	19.8825	20.8361	16.2729	20.789
AP4B1-AS1	1.56014	0.713663	1.57585	1.41574	1.66669	1.61543	0.944331	0.974146	1.34182	1.49369	0.823655	0.537045
AP4E1	35.0026	27.7104	30.1455	37.372	38.226	32.4961	35.5806	38.5889	36.1356	33.9803	31.0014	28.8226
AP4M1	24.9393	30.1552	26.6708	31.8057	27.6481	28.2032	22.8456	24.1227	25.6391	25.7965	22.7213	27.1402
AP4S1	4.83077	5.25426	6.45326	7.01845	6.55712	7.57056	5.96171	6.12778	4.32383	5.48827	5.78267	5.99181
AP5B1	39.6481	42.8531	34.4371	40.9047	38.8166	42.6389	31.0396	31.7826	30.4456	29.1462	26.3863	33.0086
AP5M1	81.1694	70.7324	72.7928	76.0377	79.8253	78.1964	80.6883	85.4836	89.9636	91.4022	80.4907	81.782
AP5S1	17.0461	19.8975	18.292	16.3314	13.982	15.1169	17.3435	15.5519	16.9337	16.0462	14.0395	14.9187
AP5Z1	29.8256	34.1017	34.4845	32.4399	29.5159	36.0888	32.2749	30.6573	25.4838	26.2472	26.6748	23.7876
APAF1	38.8761	32.4268	36.2794	39.8974	43.887	44.3818	33.4543	41.3509	42.4164	38.8602	36.246	37.0264
APBA2	29.5031	30.7236	27.2089	24.5715	14.2968	25.5902	34.9471	31.443	25.3275	29.3127	29.5322	35.422
APBA3	13.0719	13.5282	12.4577	7.19686	6.85915	7.72468	12.7092	12.334	11.4201	10.7372	10.4273	11.5478
APBB1	11.4544	14.3972	12.4534	9.96127	10.1246	9.88095	15.1533	14.0263	11.66	14.2342	16.2587	15.2718
APBB2	17.5135	17.3051	17.0369	19.038	22.2417	19.8468	17.3217	18.9609	19.1517	19.9147	18.0802	17.1075
APBB3	17.1	14.1913	15.2959	15.8083	19.3489	18.8304	16.088	15.444	15.6591	14.0073	15.0945	11.1908
APC	55.4354	49.6954	49.5554	50.9331	61.7215	56.8048	50.1822	58.3164	60.9742	58.777	50.2786	48.8127
APC2	7.61788	9.57905	6.96076	5.47661	5.28613	6.95777	6.97872	7.15774	6.35079	5.39445	4.76331	7.81855
APEH	155.652	180.765	157.499	161.041	144.135	158.502	153.634	148.358	137.388	136.8	149.821	162.766
APEX1	182.515	197.195	190.271	188.323	178.353	185.481	189.084	172.433	174.151	179.388	200.283	194.387
APEX2	37.0211	38.3012	36.7991	33.9606	26.0661	32.6419	32.9941	34.884	34.795	30.7844	33.5078	36.6874
APH1A	196.029	225.171	200.634	213.524	194.658	205.971	183.254	171.449	161.944	176.246	173.188	195.57
APH1B	3.19794	2.68057	2.35189	5.70006	5.24981	5.29204	3.04171	2.33772	3.53008	2.99866	3.5729	2.91082
API5	234.474	209.292	217.639	222.186	226.006	203.71	216.899	222.427	233.836	234.46	224.326	228.622
APIP	24.6568	24.6478	24.6162	22.1534	21.5583	20.6799	21.5776	25.8827	27.1461	26.6731	28.8928	27.6669
APLN	1248.07	1433.33	1262.19	1157.94	1099.23	1150.56	1240.02	1173.25	1147.63	1158.96	1284.72	1324.9
APLP1	55.9352	64.6931	56.1825	128.848	111.881	125.919	42.3919	40.1366	36.1602	40.0509	37.8197	45.0875
APLP2	321.393	339.182	316.626	538.749	536.179	547.598	282.776	275.102	282.505	287.782	314.186	310.781
APMAP	21.1064	20.8393	21.7453	19.8672	18.8431	19.0958	22.8405	17.969	20.1108	20.3833	20.9155	22.0106
APOA5	0.81402	0.907934	1.11811	0.498064	0.84372	0.592117	4.03718	3.00065	3.53008	2.16359	3.29189	3.22981
APOBEC3B	22.8485	26.3051	24.138	28.1106	23.8495	23.8575	26.1525	25.4043	25.2062	28.9247	28.7332	28.6401
APOBEC3D	0.690089	2.13545	1.66231	1.81965	1.28919	1.47042	1.61363	1.12442	1.85354	1.82739	1.95802	1.36465
APOBEC3F	8.70536	10.023	8.85994	9.76313	9.8558	9.53029	7.48409	7.1016	7.79716	7.33045	8.46286	8.20836
APOBEC3G	1.49979	1.33709	2.24714	1.79382	2.11319	2.04668	2.53294	1.3243	1.71107	1.22082	1.643	1.66536
APOC1	4.24264	4.87934	5.62907	7.29362	6.74852	7.46937	3.74064	2.67635	2.59906	2.99388	3.32376	3.26506
APOD	1.4096	1.18071	1.91866	1.47118	1.35747	1.38526	1.5575	2.04337	1.46943	1.79154	2.13193	2.09231
APOE	4.60854	8.14662	7.24152	9.02764	7.65271	9.19314	3.99074	3.09812	2.89126	2.86427	3.50454	3.9119
APOL2	17.65	19.9078	21.3059	15.8698	19.3823	18.9471	16.2491	16.0868	15.1879	16.1514	16.4847	16.1215
APOL4	1.23151	1.91256	2.54804	3.36828	2.83528	1.66214	2.41221	2.83951	2.21394	1.41641	3.22339	2.09955
APOL6	1.61644	1.11936	2.72937	2.24234	3.03795	1.98605	1.23948	1.61429	2.21763	1.51102	1.10911	0.730963
APOLD1	32.6939	36.6137	33.9949	27.4689	28.0232	31.3926	51.6599	44.6952	49.2584	52.1458	49.3504	53.6163
APOO	19.362	19.5422	17.4656	19.8119	20.9524	20.6501	19.6882	19.6089	18.3636	22.6228	20.0323	20.1763
APOOL	64.1051	55.4862	57.8358	61.6529	62.9318	64.5591	60.6398	65.0233	70.1131	67.8745	65.9202	68.5398
APOPT1	17.6071	22.8337	24.273	18.8719	20.1327	18.131	19.3027	20.1279	19.9875	21.6381	21.2645	21.1881
APP	136.908	136.105	128.76	113.284	107.915	110.694	150.761	149.168	155.953	167.837	169.583	173.284
APPBP2	47.4449	40.95	40.0576	55.3303	58.243	50.3633	48.9095	50.1039	52.4206	51.4742	51.8964	49.5817
APPL1	146.355	117.402	136.051	133.041	145.443	134.098	137.682	142.868	149.578	143.899	135.272	147.346
APPL2	47.8034	43.4174	46.3659	67.4113	71.4084	65.6372	49.3329	46.9637	49.1024	48.435	49.3438	49.8845
APRT	131.406	161.137	140.805	102.601	96.934	107.358	144.951	135.936	120.986	128.715	126.135	154.832
APTR	9.01525	11.671	10.6028	12.5678	9.3755	11.2284	10.2642	8.97247	10.5208	10.2106	8.80199	10.6863
APTX	61.2259	66.3097	63.7578	55.6063	57.9354	50.4563	70.7336	67.6378	66.5367	69.6377	66.0962	71.5071
AQP1	6.81797	7.78229	9.67743	4.75928	4.9217	4.69993	3.95955	5.12902	5.49124	3.94761	2.64957	3.78805
AQP11	1.22103	1.29705	1.23378	1.82623	0.937467	0.925182	1.54851	1.1863	1.6759	1.48035	1.00362	1.2361
AQP3	50.0041	57.9348	51.5873	32.5402	24.9835	29.7909	49.2757	44.6608	46.8895	50.8254	61.6225	60.529
AQP4	1.68618	1.55646	1.58078	0.664085	1.68744	1.18423	5.80691	5.12902	6.41833	8.19887	7.74798	9.21094
AQR	79.8863	73.8126	69.0264	75.4715	83.7905	75.1378	77.6846	87.0793	96.4303	88.6935	79.3677	81.3865
AR	645.041	606.34	632.887	590.199	686.933	654.602	582.8	640.204	642.779	551.591	539.93	501.288
ARAF	64.889	70.6459	62.8455	67.7367	59.2948	62.9494	65.4798	61.1644	56.8379	62.5164	60.3379	67.1482
ARAP1	51.2516	60.9042	52.5953	56.6228	49.4927	57.0247	57.1036	51.7859	54.9689	49.7092	50.8701	55.4692
ARAP2	10.5823	8.04183	9.21477	10.3487	10.1247	11.4353	13.5495	13.4331	15.3328	11.9946	10.7187	11.3646
ARCN1	212.804	212.284	205.686	205.189	199.272	190.879	231.542	230.632	240.877	247.708	247.654	257.336
AREL1	52.0391	55.2199	52.0509	54.5661	53.9136	50.849	61.0007	56.6499	54.0923	57.1645	55.0092	58.5021
ARF1	661.856	765.086	681.392	637.355	566.417	620.723	695.944	661.573	626.001	688.25	703.942	753.662
ARF3	275.885	287.631	268.256	324.1	308.961	311.857	248.302	246.561	248.736	262.914	272.718	273.533
ARF4	96.0937	95.3529	91.7607	109.142	106.419	100.991	107.957	115.753	117.967	131.672	117.561	131.03
ARF5	158.755	197.218	180.427	183.022	155.062	180.713	142.283	131.006	120.735	132.573	148.894	153.152
ARF6	146.814	140.427	132.747	134.643	134.151	134.595	145.504	143.159	141.025	141.658	143.799	154.552
ARFGAP1	68.2033	77.8229	69.7469	71.9425	65.9508	70.8697	66.9177	66.8866	62.6857	59.2141	60.659	57.6182
ARFGAP2	62.5355	64.368	63.1009	60.6792	60.1638	64.7825	58.009	62.0518	56.5912	54.8029	53.5799	50.6331
ARFGAP3	44.359	41.6111	38.7161	46.428	45.1441	45.2667	54.3882	50.8051	52.4783	55.9705	53.3125	54.9075
ARFGEF1	107.84	92.3088	98.048	93.8151	104.733	96.1547	98.0985	100.124	110.823	102.806	103.242	100.239
ARFGEF2	82.0487	66.9277	72.253	77.5509	84.747	79.4233	85.1126	87.8213	94.1712	83.2034	71.0164	79.5766
ARFGEF3	444.221	336.758	355.316	435.181	577.742	523.603	527.036	612.761	650.034	503.027	445.98	457.856
ARFIP1	44.3105	40.1373	39.5613	55.0637	46.5452	46.3331	47.2295	46.7559	49.7064	52.0454	48.2583	53.7504
ARFIP2	95.4392	102.284	95.9595	91.184	83.7387	93.1943	111.55	108.459	107.947	111.389	118.142	117.218
ARFRP1	27.6185	29.097	30.154	24.7151	26.2782	27.2914	22.8958	23.5375	23.1839	23.2608	21.4186	21.2529
ARG2	15.8685	12.0847	13.4384	11.67	10.8402	10.0762	19.4839	19.656	20.2113	21.3006	22.4221	22.5748
ARGLU1	114.835	99.3539	111.618	124.848	121.074	124.307	107.455	103.732	113.497	106.623	111.844	87.4441
ARHGAP1	99.6695	109.393	96.2835	114.119	117.318	117.074	95.5065	96.2156	89.3121	88.9232	88.4303	98.6304
ARHGAP10	8.25649	7.47965	7.32555	5.202	5.67167	6.84635	5.6963	6.59445	6.56096	5.20021	6.50348	7.69572
ARHGAP11A	161.364	145.037	154.582	166.604	187.576	175.001	179.492	187.866	203.015	200.818	209.075	197.493
ARHGAP11B	34.1968	31.7869	36.8362	35.1994	37.561	35.9891	39.4918	38.4338	42.7266	37.0237	38.045	32.9861
ARHGAP12	28.6997	25.4408	27.2441	32.2277	33.5655	31.3284	26.4622	27.9996	29.414	26.9206	28.4835	28.2154
ARHGAP15	2.45998	4.85634	3.82721	3.62186	3.6966	3.29945	2.78548	2.89046	3.5348	3.75009	3.27916	3.41931
ARHGAP17	33.1049	31.567	31.1821	30.7354	30.0483	31.0181	28.4982	28.5518	25.6743	29.0948	30.4989	28.081
ARHGAP18	18.7806	17.8993	15.7306	26.4527	24.8897	27.1263	15.8169	18.3179	18.5775	18.0679	16.2186	16.3883
ARHGAP19	36.7472	37.3982	36.2036	36.3943	41.6112	39.8939	45.5151	44.1375	49.5638	47.4851	50.3736	49.444
ARHGAP20	12.3847	10.5061	11.9137	16.8235	17.9994	18.2816	12.554	14.0612	12.5871	10.9318	12.5252	12.9591
ARHGAP21	71.0033	63.1043	64.5646	63.9527	65.5212	65.0236	69.3167	72.1353	73.11	72.9394	71.394	71.2908
ARHGAP22	1.68897	2.20714	2.05542	3.9231	2.51803	3.30202	2.93821	2.85233	3.10593	2.4932	2.3723	2.68336
ARHGAP23	2.1102	3.44991	1.69392	1.50218	1.16102	0	0.926181	0.553691	1.06807	0.232782	0.984631	0.927165
ARHGAP24	1.45361	1.42675	1.59201	3.84615	2.95302	2.22044	1.50733	1.08163	1.96116	1.17669	2.04739	1.22475
ARHGAP26	6.96877	7.4722	6.68325	8.0218	7.87145	7.81072	8.71984	10.8617	11.1376	8.86264	8.77046	9.33383
ARHGAP27	5.45628	5.27452	5.4532	6.56939	6.70319	6.45414	3.51085	4.28854	3.61808	2.39695	2.67152	2.4398
ARHGAP27P1	6.03734	5.53188	6.56539	9.13705	9.00549	8.83289	6.98454	6.31274	5.55848	5.80926	4.10955	4.58969
ARHGAP28	4.23623	3.57828	4.51845	2.05731	2.04877	2.60398	5.15093	5.34618	5.62716	5.13712	5.25814	4.54932
ARHGAP29	24.49	18.7818	19.6764	45.8481	48.1369	47.3431	10.8303	12.8443	14.5561	12.5098	10.2048	11.9005
ARHGAP30	6.45402	7.912	6.97855	4.81462	4.49984	5.29204	9.84409	8.61814	8.91435	8.61641	8.31001	6.45962
ARHGAP31	10.8272	9.84459	9.32247	13.8745	15.928	14.3945	6.47307	6.76891	7.71483	7.24281	7.39409	7.92313
ARHGAP32	5.58185	5.44761	5.59055	6.75153	7.54661	7.47547	13.5494	13.7472	15.8675	10.2865	11.361	11.6433
ARHGAP33	57.5051	61.3778	65.1752	63.5658	70.1838	70.8177	66.3513	65.4508	59.051	56.2147	67.2498	46.5797
ARHGAP35	175.068	185.907	183.863	214.171	221.475	225.199	184.639	199.915	191.758	180.091	165.919	196.312
ARHGAP39	30.1187	35.0203	31.924	30.6586	32.6707	35.9711	27.8731	24.3192	23.6408	22.0534	23.0031	25.36
ARHGAP4	3.21679	3.37918	3.85555	2.93304	2.48429	2.25744	1.65912	1.15141	1.64024	1.18773	1.20645	1.83421
ARHGAP42	1.86062	1.54454	2.00107	2.3243	2.29679	1.07321	3.58895	3.03465	3.95797	3.94591	2.95206	3.07031
ARHGAP44	4.80031	4.02059	4.81751	3.01799	2.7789	2.45625	4.07128	4.45742	3.98563	3.69205	3.67818	4.3384
ARHGAP45	39.1947	48.7876	42.1984	41.1257	44.0759	48.159	36.7372	34.1702	31.0752	29.6051	29.8908	34.5905
ARHGAP5	136.543	106.503	117.671	132.013	146.817	132.89	144.971	152.201	164.105	154.362	144.75	136.09
ARHGAP6	141.174	131.002	128.043	113.005	112.262	105.582	135.605	132.831	133.68	135.281	140.588	140.836
ARHGAP8	13.9749	14.9609	16.5951	10.7957	12.5078	12.2915	13.1728	15.4149	13.5783	12.4662	11.2441	10.8676
ARHGDIA	259.193	310.058	274.245	275.423	244.006	274.848	253.172	234.644	218.513	228.088	250.946	260.876
ARHGDIG	29.5566	30.0523	28.9411	25.9138	21.1078	23.733	26.6175	23.6011	20.612	21.5527	23.7704	21.2391
ARHGEF1	46.576	52.7162	49.7241	49.9649	47.42	50.4147	42.3309	41.051	35.7719	36.4898	38.0336	39.4134
ARHGEF10	21.4203	14.1392	18.9521	21.0066	20.7369	19.8458	20.666	22.4878	21.4812	18.7013	17.5698	17.81
ARHGEF10L	11.8614	14.4837	12.1835	13.5584	12.8433	12.6935	18.6374	19.1902	15.9389	17.081	16.1784	17.9833
ARHGEF11	135.127	127.716	125.614	151.854	153.182	155.468	119.567	124.422	123.125	114.253	114.694	113.761
ARHGEF12	161.285	138.793	142.207	174.15	203.191	189.62	171.027	199.472	208.57	184.303	166.739	169.901
ARHGEF16	53.8416	64.8092	56.7923	55.8938	52.3575	60.3219	61.332	61.7576	53.8426	57.3921	55.0388	59.0138
ARHGEF17	18.141	18.9801	16.5628	15.7598	16.5676	19.9839	22.7796	23.3287	20.8923	19.9278	21.3554	21.5321
ARHGEF18	42.3576	45.0474	37.5145	44.2473	40.6343	47.4851	33.4588	33.3173	33.7675	37.5782	33.2833	38.3785
ARHGEF19	7.90762	9.20905	7.67255	10.736	8.67157	9.58489	6.30464	5.37326	5.59821	5.42796	5.29914	5.78176
ARHGEF2	59.5979	61.0478	55.4428	59.0482	67.0757	67.6493	56.1334	52.6858	53.4504	53.9759	61.6225	56.422
ARHGEF25	18.1416	18.4037	17.2839	29.7148	30.6623	33.3805	15.2426	16.8448	15.3913	13.4076	14.9635	14.7392
ARHGEF26	47.9392	43.8158	48.1488	62.0316	63.0012	63.7416	40.7714	39.4108	44.3176	37.3934	32.3303	37.4765
ARHGEF26-AS1	4.45705	4.10676	5.48484	5.60584	4.74662	4.80383	3.42138	4.23844	3.61034	4.28327	2.88171	3.90244
ARHGEF28	12.3417	11.6334	11.451	14.7205	16.0307	16.5423	12.2775	12.5996	13.4785	14.0444	12.0845	13.4376
ARHGEF3	2.84907	3.19939	2.73744	3.48645	4.26547	4.21883	6.24934	5.37326	6.31136	5.84549	6.42319	5.26339
ARHGEF35	23.5267	23.354	25.5485	31.4463	33.7175	30.7256	21.7146	21.1997	28.4212	23.0704	28.9943	26.7786
ARHGEF37	164.083	162.347	152.526	134.477	134.198	137.297	133.172	123.585	133.038	126.096	133.121	130.429
ARHGEF38	2.68185	2.2353	2.11634	10.0256	12.6669	12.1693	1.0155	1.19263	1.19263	0.752684	0.532797	0.828205
ARHGEF39	43.9526	47.2617	46.0148	39.912	38.8479	41.0576	51.443	48.2568	44.8313	48.7905	46.5942	43.0496
ARHGEF4	24.5225	26.0409	22.1512	15.2468	14.5662	15.9254	18.6402	20.0405	21.0334	18.1899	18.1264	18.3083
ARHGEF40	10.7027	13.1434	13.0793	16.3808	18.2806	19.2876	11.1715	9.9789	9.10105	9.33768	9.36229	7.4167
ARHGEF5	61.3871	57.1241	62.5984	81.3158	79.9037	85.1587	51.2464	57.2512	56.0792	51.9008	46.9398	52.2698
ARHGEF6	13.5185	14.5555	12.5228	16.1709	19.2082	18.5672	17.3322	17.4853	16.5224	17.7027	21.567	19.6737
ARHGEF7	53.5509	50.239	48.0016	52.2967	57.6073	52.2543	51.5432	51.2204	49.1359	51.0152	51.3454	51.8763
ARHGEF9	35.2081	31.9367	32.1474	34.5458	38.8819	35.2569	38.4479	40.7447	40.3163	36.6468	41.2154	30.356
ARID1A	379.699	380.753	385.694	313.815	367.874	378.813	365.088	395.659	391.84	334.791	343.105	339.841
ARID1B	88.2254	86.8296	81.2372	103.942	98.3385	104.325	87.6021	91.7548	90.0644	84.714	84.779	86.425
ARID2	131.42	109.534	119.79	117.275	133.827	128.621	107.677	118.776	131.298	106.701	111.647	105.594
ARID3A	11.0312	10.5225	10.8451	12.5453	11.9525	15.5791	9.03741	8.6438	9.69866	8.90559	8.58305	9.61766
ARID3B	10.7293	12.4843	12.4272	12.1731	11.8971	14.8554	12.4263	11.8781	11.9462	11.6672	9.88337	9.49685
ARID3C	1.33732	1.03764	0.578333	0.940787	0.84372	1.07321	1.16138	1.1863	0.855777	0.948944	1.36493	0.717736
ARID4A	34.0144	38.7818	44.3388	46.3753	50.5295	44.8158	32.5187	34.333	40.8277	33.6685	39.7837	32.019
ARID4B	134.742	124.288	153.866	148.948	172.27	152.516	149.385	152.697	164.272	154.057	154.09	137.072
ARID5A	9.47752	13.2731	10.9112	5.97676	4.68733	4.5889	7.35541	6.48978	8.2012	9.3376	8.83189	9.17107
ARID5B	102.683	90.4908	94.3839	98.9487	98.7621	98.4024	98.7174	105.302	111.929	101.954	107.829	98.2102
ARIH1	94.9084	82.0916	86.8446	93.5691	99.2056	91.8418	90.5376	89.088	90.5947	89.1293	84.0176	88.89
ARIH2	155.159	156.642	158.123	151.531	155.262	153.231	165.519	157.823	162.187	157.775	145.219	137.791
ARIH2OS	2.7927	2.69419	2.11101	2.93966	2.51131	2.69906	2.1195	2.1334	1.15309	1.25813	1.79798	1.24489
ARL1	266.886	239.373	247.672	159.085	152.986	142.555	269.924	283.241	288.699	284.52	295.706	285.184
ARL10	20.0651	20.4827	21.6859	8.78736	8.94313	9.19766	42.356	45.5603	46.0097	42.2436	36.6411	40.4055
ARL13B	31.4588	27.1112	32.2742	38.6858	39.8806	37.6381	26.6032	27.8455	29.493	29.1515	29.346	25.8385
ARL14EP	15.9471	13.3015	14.7071	19.1302	17.4138	16.7595	15.0773	15.0683	14.8691	16.677	14.5398	13.4248
ARL15	5.58185	3.50203	3.93266	5.53404	5.43731	5.25504	5.58569	3.94271	5.70518	5.69366	5.33928	4.74503
ARL16	27.6553	27.9014	30.5255	32.0835	26.5235	27.2571	28.2655	27.9691	25.9673	26.8872	26.0391	27.3575
ARL17A	16.133	11.0253	12.5257	22.3469	21.6234	18.4099	11.1086	14.7381	16.7535	18.5982	16.6317	14.3392
ARL2	43.0232	59.2692	51.6331	35.2474	31.4143	35.2412	48.7369	44.4429	41.3138	45.6317	48.5125	48.5785
ARL2BP	57.3771	56.8368	52.8656	59.6028	55.4592	54.2205	50.6227	51.577	45.5885	52.8391	53.213	54.3738
ARL3	31.2235	32.9018	33.2348	32.8169	29.3427	26.4232	29.5876	28.7853	30.4871	32.4918	34.9261	36.5646
ARL4A	27.8511	23.6495	25.0833	29.719	29.2902	27.0893	31.7997	32.0649	31.8064	32.5677	33.96	34.2519
ARL4C	2.90721	2.50763	2.082	2.76702	4.49984	3.62671	2.04624	2.26793	1.74721	2.73296	1.56565	2.23296
ARL4D	1.68618	1.46999	1.46511	1.93691	1.78119	2.81255	1.99094	1.1863	1.03406	1.59423	1.36493	1.47535
ARL5A	29.9627	26.6324	29.1798	26.7294	27.9914	25.9969	33.7621	34.1825	34.3267	39.0965	32.055	35.0327
ARL5B	79.1344	62.2583	65.7371	83.8407	88.5906	79.5287	80.7436	84.2275	88.466	92.3891	79.6878	77.4357
ARL6	22.6763	17.4669	18.6223	26.8954	22.6398	24.6098	21.1261	23.9354	25.8873	26.6463	23.806	25.2005
ARL6IP1	268.678	260.979	256.463	344.449	335.713	320.637	305.393	312.265	321.79	358.152	344.52	361.399
ARL6IP4	146.379	176.805	166.046	114.54	106.791	113.256	153.797	142.717	145.697	147.924	161.326	160.841
ARL6IP5	71.2278	66.1087	70.1719	68.8988	57.8899	59.2147	66.254	69.6093	68.427	74.5126	77.5601	77.6791
ARL6IP6	15.9897	15.0025	14.2655	17.2662	13.9683	17.7265	13.6601	13.8867	13.4072	13.0575	11.6822	13.956
ARL8A	53.5508	62.6042	60.2236	60.653	59.1541	58.2125	46.1787	42.5323	43.8941	40.6906	49.3782	52.3149
ARL8B	53.8998	46.7833	48.0016	60.155	57.6099	57.4353	56.1887	52.4737	56.2681	59.2141	55.1978	53.9099
ARMC1	56.5162	47.1693	46.8449	44.4383	47.2483	46.1481	56.8524	52.4416	54.0566	64.3384	57.7285	56.3821
ARMC10	47.6743	43.9604	32.029	55.4057	39.8207	48.5577	44.4485	40.6074	35.1418	34.0505	32.7778	37.8631
ARMC12	1.22103	1.55646	2.12055	1.21749	0.84372	0.629124	2.32276	2.30282	1.85418	1.78401	2.00725	0.837358
ARMC2	1.68618	0.994404	1.50366	2.37964	1.17183	2.5535	1.4932	1.22119	1.6759	1.36648	1.00362	1.2361
ARMC4	1.10474	1.25381	1.58078	3.70781	3.16933	3.40467	1.99094	2.71501	2.57136	2.23951	2.00725	2.79119
ARMC5	11.5938	18.1573	15.5234	13.6426	10.3404	13.7538	13.6343	11.5652	10.1458	10.8006	10.7229	12.2697
ARMC6	34.06	39.1173	35.4376	34.7569	30.4177	36.7201	30.5333	30.2644	26.1811	27.9982	28.2295	34.0962
ARMC7	12.3847	12.4949	11.9908	11.0127	9.42154	12.2494	9.51226	9.38575	7.98725	9.75514	9.15305	9.33056
ARMC8	52.0608	50.0538	50.141	52.8938	56.5023	50.9124	54.9386	56.4445	55.319	54.9748	55.4417	55.1828
ARMC9	18.0277	14.7678	14.8299	16.9118	15.1758	17.5442	13.9141	14.553	14.336	15.7504	14.1731	16.8477
ARMCX3	36.2758	31.8249	35.3638	47.3678	49.967	51.1811	39.462	38.032	41.7512	42.2088	44.9735	41.0082
ARMCX4	35.9332	33.2045	32.4637	40.8966	46.3577	44.2237	35.9475	39.3922	40.0432	33.7824	34.8458	30.5038
ARMCX5	14.4462	14.0631	15.3432	18.1247	16.8684	16.0917	16.2392	16.3617	17.5916	17.4328	17.5794	18.8131
ARMCX6	21.911	18.0327	22.1015	26.726	25.8487	26.9317	19.203	16.5119	19.048	19.2907	20.0154	20.1722
ARMT1	25.5835	21.6175	22.555	40.0665	40.8735	38.7096	31.5232	31.4719	33.1614	34.3518	30.7109	33.8133
ARNT	107.247	101.515	101.523	136.537	133.487	124.579	95.1589	97.1176	99.6897	99.3512	108.584	100.159
ARNT2	8.02622	10.6975	8.23231	0.689684	0.390016	0.564777	8.80993	10.3543	10.6173	9.28787	9.95979	10.5751
ARNTL	5.75628	7.18352	5.47624	6.75649	7.79972	5.81324	6.04292	5.62064	6.35124	6.72044	6.2642	5.46892
ARNTL2	19.5067	19.3457	19.4381	20.6226	20.8683	20.5781	18.5221	20.7849	23.3902	19.6095	19.4178	20.1146
ARPC1A	183.076	202.597	187.255	202.696	181.73	190.243	207.627	196.715	185.315	207.758	204.766	214.658
ARPC1B	35.4779	39.6657	30.536	50.081	39.6242	51.992	25.8785	25.6001	18.7006	26.3217	23.4823	26.4014
ARPC2	145.573	155.411	155.299	144.082	145.578	144.877	150.326	144.443	145.529	150.835	156.08	159.013
ARPC3	143.387	140.254	146.37	160.625	163.274	152.759	136.536	131.903	138.782	145.714	153.193	149.781
ARPC4	82.9909	98.1296	86.5367	85.1878	80.4472	84.9215	78.8824	77.2139	70.3199	78.2989	79.5472	84.109
ARPC4-TTLL3	0.398869	1.37464	1.79313	2.80652	3.28967	0	1.91081	2.76011	2.78547	1.67008	1.99883	1.50024
ARPC5	214.279	199.026	189.557	210.539	196.965	191.531	194.184	191.606	190.268	210.612	186.148	212.854
ARPC5L	48.4342	54.0005	48.5414	42.0587	39.5611	42.8174	43.4135	46.8241	38.6169	41.7156	44.0792	42.9844
ARPIN	77.3099	72.7572	69.8254	54.5947	49.4681	55.2076	72.686	71.1495	78.8089	75.5376	76.7798	71.5124
ARPP19	245.209	224.914	231.683	269.541	257.313	250.232	246.787	247.471	256.523	268.499	248.687	258.42
ARRB1	37.2666	33.3366	32.7271	14.2312	11.8795	13.8498	32.382	32.7315	32.8554	33.6589	35.0496	36.5677
ARRB2	45.2726	53.988	53.0107	49.4873	48.6213	52.5729	49.1379	52.2733	47.0016	48.3542	54.4435	49.612
ARRDC1	50.2367	52.7467	57.2164	57.1666	54.6337	58.2125	45.2386	45.4858	40.939	41.2601	42.0318	36.7241
ARRDC1-AS1	13.315	16.8616	15.3547	13.2503	13.0777	14.5835	14.5581	13.5533	15.2201	13.9684	14.0507	12.7855
ARRDC2	27.2697	30.7401	28.6853	31.2673	31.6395	34.6388	24.6655	22.4002	22.0006	20.3453	22.2403	19.9371
ARRDC3	19.362	16.7319	17.3568	23.0432	20.9213	21.7603	21.292	21.1092	21.6797	22.0155	23.525	21.0137
ARRDC3-AS1	1.73435	3.25889	2.42231	3.06455	3.14692	2.56707	1.92778	2.95807	2.7601	2.84914	2.62785	1.66293
ARRDC4	15.6408	14.3972	14.1113	10.238	10.359	9.02978	19.9647	17.8992	19.6116	19.5482	16.7405	22.2897
ARSA	25.1207	29.0107	28.1343	32.0421	30.0929	35.8924	24.2998	23.1757	21.5435	20.8435	22.3206	19.8972
ARSB	10.468	9.65289	8.59326	14.2125	14.9349	15.8871	9.84225	11.5679	9.72025	11.5023	10.439	11.2152
ARSD	36.5861	37.0418	35.0442	34.8857	35.8216	32.2112	31.7175	32.3063	28.5654	31.5363	33.99	38.3065
ARSG	10.4337	11.5624	10.6625	9.11854	9.8984	9.44381	13.7738	11.1298	13.7176	11.4085	9.756	9.87731
ARSJ	4.13566	2.9908	3.75195	28.0576	30.6651	30.9531	1.82503	1.71491	1.96401	2.3213	1.60967	1.39734
ARSK	11.6526	10.5848	10.4051	13.868	16.1582	11.0154	13.7361	10.9457	11.6252	13.4423	13.7551	11.3909
ARTN	6.45402	7.82553	7.40266	8.0797	8.10909	8.77073	4.47961	6.52467	3.95797	5.04838	4.77725	5.22352
ARV1	19.4812	21.3148	19.0473	17.8196	18.6556	16.3572	22.5087	21.493	22.9277	22.6987	24.0067	23.0473
ARVCF	42.9686	53.1358	42.7581	41.616	34.8738	43.8536	43.69	37.857	36.1209	34.124	32.7583	36.6444
AS3MT	10.4928	6.36686	10.5707	10.2041	3.4291	9.10335	6.80572	6.8175	4.9794	3.89431	4.27369	5.76023
ASAH1	66.3518	59.0785	62.29	73.1892	75.1473	62.793	55.2026	57.2012	56.096	58.1491	53.7256	55.1023
ASAH2	8.64796	9.80671	7.67412	8.22907	9.30715	8.57267	10.5783	10.8805	9.45246	14.0748	9.14427	9.39115
ASAH2B	24.1551	16.0832	20.2111	20.4986	19.9429	15.2647	21.8425	25.1207	25.0469	24.9009	26.3695	24.184
ASAP1	58.0564	49.9579	54.3633	45.3238	46.8733	45.3339	49.7182	52.9301	56.4813	51.0298	54.3161	51.7567
ASAP2	71.5516	62.8359	62.8838	85.3363	86.7482	81.7363	76.8634	79.4405	83.3418	75.8132	83.37	85.256
ASAP3	8.99482	8.53874	8.82922	13.3647	11.9996	13.1275	5.8965	6.17533	5.31635	5.23817	5.92138	5.48287
ASAP3	8.99482	8.53874	8.82922	13.3647	11.9996	13.1275	5.8965	6.17533	5.31635	5.23817	5.92138	5.48287
ASB1	45.8758	44.2013	46.5783	48.2568	49.6857	52.4002	42.5287	43.7886	43.0385	42.1711	43.6777	43.9813
ASB13	27.7348	32.21	30.2661	23.4643	25.546	26.3862	28.5921	26.971	24.3897	25.5076	24.2877	28.9088
ASB14	1.82378	1.58727	2.01444	1.23833	2.83336	2.14214	1.40526	2.19887	1.95599	1.11922	1.09965	1.17111
ASB16	5.67382	7.88733	6.11886	10.1094	9.11212	8.8123	6.97432	6.46158	8.35754	5.83379	5.8454	4.38437
ASB16-AS1	22.2206	21.9203	22.165	18.6137	20.3935	22.8618	18.1083	18.6295	17.5765	17.0472	19.4244	14.5254
ASB3	17.3855	15.3486	20.5608	17.7636	17.1642	17.5464	19.1215	19.8345	20.7858	16.8567	18.5242	18.2841
ASB6	43.3542	46.5982	43.0794	40.3517	37.184	40.2824	37.7365	35.9767	34.5486	35.0429	33.1663	36.8577
ASB7	17.8768	13.2605	14.3812	12.8943	12.9234	11.2398	18.3284	16.8714	19.2193	16.7014	16.9165	17.0658
ASB8	44.438	43.6595	44.9499	50.9998	49.6021	49.0246	42.5014	42.9036	40.5979	43.9297	41.6388	46.6975
ASB9	16.513	19.023	17.3403	38.832	32.5301	35.2721	15.651	15.8057	15.8667	14.0426	16.6997	16.5079
ASCC1	20.3208	19.1785	18.3079	19.5752	20.4812	21.0358	19.9658	20.3796	19.3799	21.3304	21.7208	22.9506
ASCC2	49.4875	55.1246	51.6928	47.8141	43.874	48.1144	49.2204	47.5246	42.8717	46.1287	51.3275	48.8459
ASCC3	85.4721	73.3697	75.2218	69.8949	73.5443	63.9486	89.2604	97.7654	108.078	100.284	89.2021	95.7778
ASF1A	20.8738	19.9746	18.9308	20.5866	21.843	18.8367	26.1587	24.1797	28.5616	28.1646	29.5066	28.9088
ASF1B	88.6119	107.525	94.114	93.0826	86.2001	88.4474	87.2142	83.2855	79.6229	87.2648	83.3008	97.9709
ASGR1	2.0935	1.4439	1.38996	1.11685	1.70131	1.73845	0.967464	1.08679	1.37702	1.5343	1.39597	1.08776
ASH1L	213.101	170.643	182.883	203.978	258.424	229.13	189.219	223.621	252.135	184.4	182.196	157.882
ASH1L-AS1	5.46627	5.8397	5.13348	5.34826	4.15489	5.73106	4.00893	5.3711	5.43579	3.90834	3.72908	4.35924
ASH2L	61.8244	62.3301	64.3928	64.5467	58.8706	62.5824	64.3621	60.9643	66.0621	69.7632	64.5147	68.2538
ASIC1	42.0383	41.8514	43.9533	31.046	31.7332	31.3452	54.6955	45.9867	47.4243	45.6632	46.5682	48.5269
ASIC3	8.60535	8.47405	8.94488	6.14279	4.96857	8.28963	7.1342	7.15271	6.66793	5.57979	5.49986	3.7083
ASL	42.568	49.2436	41.5106	37.4677	35.099	37.2722	39.4687	38.5228	35.3877	37.2061	33.3268	34.4122
ASMTL	17.9443	20.936	19.6702	21.0872	19.7936	21.6158	17.1467	17.0049	15.0467	14.1483	14.7664	18.2226
ASNA1	75.2969	82.1032	71.906	76.2037	62.3415	68.2785	72.7246	65.5258	64.7182	69.5386	72.2208	78.9509
ASNS	90.3617	93.9731	93.1071	94.0632	89.6637	83.2941	117.106	118.67	113.72	122.288	117.323	127.08
ASNSD1	49.0738	47.7746	44.3774	46.8733	44.4828	43.7796	40.0953	44.8004	42.1114	48.6239	43.1558	45.6161
ASPH	112.256	99.8809	107.105	101.61	105.739	101.298	120.468	122.746	131.25	136.076	135.931	139.124
ASPHD1	35.8353	40.3055	36.8731	24.7133	19.7507	23.2651	22.2361	20.5228	19.4422	20.2111	22.5902	21.8856
ASPM	294.036	229.837	263.72	329.331	407.189	347.424	348.801	386.212	432.667	381.703	372.023	316.521
ASPRV1	2.67604	3.20116	1.89278	1.8302	2.39182	1.77808	1.7739	2.40947	2.3209	1.55702	1.68838	2.51457
ASPSCR1	32.739	42.3688	40.9066	34.7619	37.4927	39.1448	34.9277	34.1884	30.1686	32.8524	28.9276	30.1793
ASRGL1	16.3271	18.0996	15.736	24.0567	21.3246	23.4922	13.9079	12.4724	12.1333	13.2003	15.8922	16.0368
ASS1	3.73112	4.879	3.95503	4.36777	3.11431	4.25958	3.75676	4.58368	3.56313	4.36494	4.40916	4.12172
ASTE1	14.9177	15.674	13.7754	14.517	14.2269	14.8208	12.5134	11.9908	13.0946	13.7759	12.2887	12.957
ASTN1	4.0701	3.71821	4.24111	2.37964	2.43741	3.07161	1.76972	2.26793	3.13785	2.12563	2.16783	2.23296
ASTN2	14.4625	13.1659	13.1444	12.7551	17.0497	15.0256	14.912	14.3991	17.1243	15.3211	12.7399	13.054
ASXL1	112.684	102.337	97.1213	97.5651	100.684	102.029	109.391	108.407	110.823	108.18	111.322	104.271
ASXL2	78.8437	63.9013	64.4648	80.465	88.9656	89.4836	73.4988	84.3322	86.5405	75.9155	72.3412	68.2248
ATAD1	48.1375	43.4668	46.0137	52.1005	52.6801	49.2329	55.2145	55.0025	57.8696	60.3647	58.431	56.8132
ATAD2	150.019	128.413	134.388	160.653	157.877	154.91	130.304	138.033	147.381	142.055	134.718	134.543
ATAD2B	38.2197	25.0725	28.2188	35.0408	36.8067	32.9628	27.4524	28.2058	31.3582	31.4808	25.5317	25.727
ATAD3A	163.799	181.071	171.363	123.531	108.689	122.911	167.825	150.628	143.588	151.493	161.398	166.556
ATAD3B	63.2678	63.0664	65.3313	50.955	47.2801	52.6752	55.1303	54.1277	54.3465	49.8785	45.3898	39.1629
ATAD3C	3.85016	3.93533	4.1361	2.35191	2.65526	2.6972	2.31499	2.94379	3.50107	2.92467	1.82758	1.44457
ATAD5	41.113	28.9627	38.0061	40.1961	45.7512	40.7553	34.1783	37.7914	41.7735	36.8688	33.0106	25.8951
ATAT1	3.07541	6.46027	6.2777	3.66194	4.95372	4.26481	4.08534	3.52109	5.70532	5.2044	3.90261	3.05438
ATCAY	10.474	10.5922	9.35945	1.25321	2.33612	1.631	1.57525	1.73153	2.34372	1.16039	1.34211	1.23612
ATE1	40.731	34.0303	35.0325	41.508	47.8679	41.6999	38.1405	40.8092	41.332	43.2811	40.2729	42.6089
ATE1-AS1	0.842146	0.946801	1.55669	1.38078	1.02094	1.26555	0.904	0.990584	1.27862	1.2433	1.63842	1.01348
ATF1	46.2829	37.3118	44.2617	45.2131	48.8889	48.4425	45.8469	47.5909	47.9583	47.599	50.1812	49.2446
ATF2	21.8041	20.5798	20.2802	27.5595	26.5772	26.7563	30.1959	29.0295	33.9458	32.8334	31.1525	32.3778
ATF3	20.3505	21.7904	20.2802	19.5905	18.89	18.6517	19.8541	17.9341	21.0735	20.0037	22.2403	19.6181
ATF4	251.798	268.233	278.425	237.972	231.217	247.341	286.375	263.196	262.094	281.919	307.374	296.253
ATF5	51.1521	52.8681	55.4839	36.0212	36.26	37.7617	51.1776	49.4497	49.1071	53.4276	57.4783	56.6433
ATF6	114.917	102.002	107.59	89.9427	89.6425	88.725	128.191	130.767	139.715	133.708	136.161	137.915
ATF6B	24.6362	25.1573	22.3074	38.5957	33.175	28.0066	21.8185	13.5211	19.7297	8.99164	17.9055	24.7132
ATF7	90.9084	80.1746	82.1644	86.7151	93.6127	91.5292	91.915	96.8359	97.4638	90.0139	91.5953	85.1738
ATF7IP	88.8284	73.8955	82.5312	86.9819	102.534	96.8495	92.7648	95.7961	104.301	96.4694	89.6744	82.5853
ATF7IP2	3.47304	5.10101	6.28707	6.10643	7.86843	6.74238	9.13615	8.18826	10.9822	8.35482	8.17565	8.71569
ATG10	18.9542	19.1051	18.9872	21.9504	19.9082	19.346	19.7867	20.1829	20.5183	21.8892	19.265	20.3484
ATG101	42.7663	51.1902	52.5917	40.0111	37.9205	39.8939	52.5387	43.3699	45.4988	44.3643	48.2543	50.2814
ATG12	73.7143	63.0507	70.2473	82.0697	81.5841	77.9823	75.0396	77.0889	76.8139	76.9576	74.0467	67.5005
ATG13	73.9787	74.0543	69.9443	82.7309	76.6804	78.3134	84.2736	85.0378	84.2492	84.2127	80.0987	87.3456
ATG14	24.0514	22.0479	22.0891	23.8419	24.4537	24.4663	22.4	25.5568	24.0014	21.8074	23.1364	19.6669
ATG16L1	13.3441	14.5702	14.439	13.5307	12.1636	13.8222	14.5449	13.5727	14.4234	13.0954	13.3281	13.4575
ATG16L1	13.3441	14.5702	14.439	13.5307	12.1636	13.8222	14.5449	13.5727	14.4234	13.0954	13.3281	13.4575
ATG16L2	15.0806	14.6751	14.5014	14.8269	15.9928	15.1198	14.4808	14.7013	15.4676	12.7138	13.2753	10.3753
ATG2A	36.7702	44.2637	36.2714	54.4763	50.0537	52.5346	35.1218	34.5114	30.4148	32.4854	28.6281	30.8806
ATG2B	48.0917	35.7469	39.5093	46.8866	58.2432	52.7185	46.1835	53.5714	53.4916	42.1263	39.842	36.2172
ATG3	87.9142	86.1675	86.7887	91.2514	85.1221	88.1884	87.9332	85.5186	88.3947	98.1587	97.994	98.4893
ATG4A	19.2458	17.6399	22.4779	24.0731	23.0617	23.7953	22.1215	20.6207	23.5695	23.1542	20.0725	26.317
ATG4B	67.2745	76.3109	75.2238	67.6833	65.0151	73.4976	63.7109	64.3448	57.0879	55.7599	58.8943	60.2132
ATG4C	20.2924	17.5102	20.7814	19.2585	17.3431	15.9871	19.7435	21.8768	23.8548	25.2799	23.525	24.3631
ATG4D	52.6693	67.1778	59.2876	53.1274	44.812	53.0521	57.2102	48.313	45.6756	46.8476	47.0741	53.4726
ATG5	25.2577	26.3096	19.5896	29.4138	26.6549	24.3954	17.7402	29.2935	24.3353	26.4183	28.3251	31.4768
ATG7	18.6711	18.4238	15.3655	15.2147	16.833	14.8405	21.5909	17.8622	20.562	20.5747	19.0798	17.7583
ATG9A	76.3625	89.261	79.7377	74.7421	72.5777	79.4505	82.3266	81.5474	72.9143	77.4485	83.2767	79.9569
ATG9B	4.18557	7.29154	5.50673	4.01152	4.20712	3.80226	3.30349	1.87281	2.4858	2.52269	2.96843	3.9312
ATIC	140.091	143.54	144.039	136.685	133.636	136.002	140.14	140.125	139.577	148.035	147.721	152.718
ATL1	5.18586	4.74584	3.91985	2.0696	1.87258	2.43778	5.68316	4.55057	5.79854	4.94425	5.85651	5.35259
ATL2	57.59	48.6349	50.6274	65.3815	67.4784	61.08	56.2736	57.8752	61.333	64.1765	55.1576	60.0708
ATL3	200.78	189.782	185.66	253.361	253.817	247.149	220.399	235.344	213.189	230.288	215.884	240.262
ATM	52.3335	43.8016	47.7791	62.7956	80.4808	69.6666	54.8591	66.4334	76.4128	57.7529	52.1959	50.7262
ATMIN	119.044	107.701	103.279	116.951	119.755	115.831	104.005	104.04	105.083	103.618	110.708	110.778
ATN1	486.102	502.14	491.66	463.933	450.812	507.322	511.925	487.815	473.391	454.766	529.566	426.883
ATOH7	1.16289	0.864699	0.963888	0.885447	1.12496	0.999197	1.05077	1.11652	0.641833	1.13873	0.883189	0.917107
ATOH8	1.80247	2.42116	2.81455	1.05147	1.4062	0.925182	3.26293	2.89598	1.56892	2.23951	2.4087	3.03044
ATOX1	16.2804	17.3357	17.2343	14.6652	11.5777	13.2856	12.4987	12.4213	10.4897	12.3708	13.4792	13.9487
ATP10D	17.7407	13.7055	14.4969	21.8622	25.4481	21.1362	12.6577	12.6603	15.3719	14.8861	11.727	15.1522
ATP11B	56.4243	46.1646	47.9284	56.4016	62.8173	60.8349	45.2342	50.5517	51.036	48.1963	47.3059	45.7908
ATP11C	36.689	30.2212	31.6155	33.5363	39.5611	33.2696	31.2467	35.7636	38.5456	35.1868	30.751	33.9728
ATP13A1	117.337	132.126	119.329	110.626	105.652	118.572	122.166	115.002	103.316	115.467	119.512	117.19
ATP13A2	111.687	129.732	112.52	112.885	100.183	116.632	105.752	103.181	89.5466	101.338	102.822	117.979
ATP13A3	236.357	190.465	198.858	230.714	247.736	229.334	264.518	279.444	283.048	291.869	257.65	265.682
ATP1A1	284.449	303.28	278.452	344.752	319.43	337.959	270.221	262.827	253.62	267.456	268.784	292.117
ATP1A1-AS1	1.95377	1.38001	1.82936	1.35341	2.32369	2.41128	2.28544	1.97602	2.03075	1.55972	2.16759	2.53832
ATP1A3	103.479	113.907	102.261	27.8916	25.1776	27.6507	74.5593	69.5107	68.7207	69.3756	69.7318	70.545
ATP1B1	85.6951	80.6454	79.7586	60.3764	59.7923	56.0842	153.966	156.704	152.347	182.386	176.435	186.083
ATP1B3	137.569	138.523	134.79	102.435	96.6059	89.7057	166.631	162.244	153.719	175.668	153.755	174.29
ATP23	3.19794	3.54527	3.37361	3.95684	3.63268	2.84956	3.29058	3.06279	3.45877	3.45415	3.15138	3.48899
ATP2A1	8.4778	8.39909	9.55525	5.77209	6.28893	7.87753	7.33009	8.43391	7.9695	7.71907	6.77821	4.41907
ATP2A1-AS1	1.46487	1.50172	1.20173	0.813419	1.16393	0.708158	0.633661	1.05652	0.944845	0.897337	1.05006	0.884201
ATP2A2	803.544	772.407	713.94	755.209	746.077	771.435	983.898	1004.64	1028.78	1002.59	965.896	993.771
ATP2A3	8.60939	8.30658	8.0396	3.83188	4.31235	3.45181	9.30686	8.8834	8.85158	8.35894	8.27809	10.3673
ATP2B1	165.072	150.371	160.622	193.597	209.183	192.031	157.498	170.422	174.971	173.391	159.536	162.447
ATP2B1-AS1	4.81632	4.33088	3.99645	4.42866	4.20501	4.32947	3.22361	3.45696	4.15307	3.79404	3.73198	3.77472
ATP2B4	52.2136	49.5473	50.3535	70.4483	80.1065	79.7877	51.5985	57.5008	57.1231	53.2547	50.2214	49.5238
ATP2C1	145.386	142.22	136.04	140.934	136.822	132.349	174.358	177.643	179.473	187.628	175.429	186.331
ATP2C2	3.08183	2.36286	2.45804	3.69132	3.01543	3.29038	1.79004	1.76358	1.76823	1.75772	2.21386	1.05738
ATP5A1	656.629	689.74	657.424	678.604	630.647	619.831	619.33	613.027	580.993	646.113	583.997	670.561
ATP5B	1615.25	1799.57	1591.65	1532.49	1387.03	1423.52	1604.36	1563.27	1471.83	1626.64	1477.54	1747.25
ATP5C1	155.868	157.557	155.444	159.91	146.588	145.209	150.124	139.316	145.113	161.195	145.762	161.361
ATP5D	198.171	259.913	235.487	162.919	131.703	166.951	196.867	175.89	154.024	169.21	172.701	197.464
ATP5E	160.727	177.687	169.517	142.396	130.765	129.297	158.561	151.622	146.681	163.411	161.856	167.005
ATP5F1	206.834	215.704	199.191	200.62	182.692	171.512	208.282	197.13	203.89	226.17	217.991	220.089
ATP5G1	95.5892	113.447	103.329	72.0527	57.9817	66.5371	92.7446	89.4682	80.0501	90.8701	94.5013	93.4432
ATP5G2	256.161	307.822	283.501	240.11	219.644	237.58	250.183	240.577	226.131	243.437	254.568	270.773
ATP5G3	113.592	117.857	99.8306	104.974	97.0593	95.6651	112.211	106.216	98.5124	113.854	108.304	116.382
ATP5H	100.476	112.645	111.548	105.98	99.4586	95.3711	98.7	100.921	97.6635	112.36	108.077	113.397
ATP5I	107.732	122.751	116.655	90.7621	74.1225	87.2633	97.7846	89.902	85.1226	96.883	103.426	95.9914
ATP5J	79.7262	89.7215	85.775	76.312	69.5689	73.7601	81.042	81.2848	77.3518	78.1955	87.0604	87.4603
ATP5J2	417.269	447.823	430.569	324.319	296.788	320.084	401.269	367.778	368.354	387.195	450.911	420.638
ATP5J2-PTCD1	47.1383	51.8881	49.9151	47.7533	50.7425	51.3007	46.5805	48.7669	43.7044	37.0883	41.8195	39.7042
ATP5L	133.12	150.41	140.447	139.213	121.67	134.918	128.533	119.846	120.075	134.265	134.663	133.487
ATP5O	147.294	152.22	143.556	130.111	121.121	120.919	143.668	144.047	143.937	149.752	139.852	150.926
ATP5S	48.2289	42.4556	44.5068	41.071	41.5099	38.4602	43.0137	46.0175	48.1289	45.544	41.209	42.3695
ATP6	4197.27	3756.16	4922.13	4325.74	4306.88	4287.95	4154.76	3973.42	4319.19	4238.44	5223.12	3438.97
ATP6AP1	107.969	122.472	110.829	113.479	108.088	113.723	101.096	97.8048	92.6579	97.6495	98.9697	108.738
ATP6AP1L	7.69536	8.08404	10.8847	8.77716	11.2297	9.5757	11.0345	11.4429	13.1831	11.3364	9.80279	9.50327
ATP6AP2	64.8278	63.0326	60.9441	81.13	79.2648	77.7096	64.2619	65.3045	65.2743	72.4365	67.7738	70.1786
ATP6V0A1	99.741	97.0129	97.5547	99.2194	103.616	100.642	96.9089	100.815	97.1208	96.3878	96.5212	96.7054
ATP6V0A2	48.2777	43.6677	43.3017	55.7557	56.2173	54.8459	48.5536	51.0954	47.9522	49.9318	44.3414	44.6654
ATP6V0B	120.824	141.032	121.488	120.531	95.9028	103.25	114.479	113.92	93.4937	104.953	96.9501	109.973
ATP6V0C	211.152	250.72	218.25	206.5	171.603	204.668	197.899	179.023	166.22	173.078	208.208	206.47
ATP6V0D1	69.64	72.5347	72.9829	70.4178	65.6833	71.1652	63.764	61.0798	57.3986	64.1276	63.8845	66.6754
ATP6V0E1	28.8396	32.383	29.9962	38.849	34.78	33.6766	27.6519	28.0177	28.6329	31.2392	32.959	30.6633
ATP6V0E2	114.158	145.085	121.818	112.649	91.2381	100.989	118.764	108.275	103.407	116.265	115.228	123.613
ATP6V0E2-AS1	13.1198	14.9274	15.7867	12.0885	11.0396	11.0318	11.421	12.7281	10.0192	9.67861	7.69598	11.0421
ATP6V1A	253.923	220.448	231.263	294.651	294.997	282.763	249.904	261.012	263.755	275.685	242.03	261.167
ATP6V1B2	72.2657	70.0458	63.6544	55.7494	55.8981	55.309	66.2216	61.2964	60.8853	64.8358	57.8568	62.2159
ATP6V1C1	88.5176	76.1491	78.7341	93.3824	89.4043	87.6052	86.652	88.4151	94.9476	92.8199	83.5211	92.0559
ATP6V1C2	27.0299	25.3693	24.6092	26.8049	25.4469	25.5475	22.89	24.1794	24.7755	21.9528	22.9253	21.1446
ATP6V1D	44.3683	42.3292	38.2885	44.8767	41.9773	44.9918	47.9312	47.1968	46.5346	48.8246	47.3711	45.4348
ATP6V1E1	67.3937	72.4387	70.0876	74.6117	71.4147	71.5008	70.8954	71.1803	70.1978	76.2969	72.1933	78.6333
ATP6V1E2	4.5461	4.79468	4.02406	3.72183	3.70299	3.85237	5.46783	5.05283	4.45466	5.80554	4.5596	5.54251
ATP6V1F	70.8117	81.1861	78.4529	68.6173	55.6355	65.829	64.7569	62.2082	61.0763	62.9674	69.3251	69.4178
ATP6V1G1	68.1451	67.4033	63.8094	72.3296	60.6072	61.4691	68.0237	67.4099	71.6713	67.8684	79.5269	75.0831
ATP6V1H	42.6779	43.1053	41.0231	41.616	42.8627	40.7823	38.6574	36.3402	37.4761	37.9898	37.1341	40.3128
ATP7A	16.1268	12.8573	13.7688	15.3192	19.8823	17.0527	12.4474	14.8967	17.0934	16.3367	12.8206	14.0782
ATP7B	16.2544	13.8347	14.133	16.3695	16.9701	17.7455	16.1921	18.4019	16.4515	16.284	15.9497	16.0772
ATP8	374.97	335.588	433.669	381.404	327.876	364.001	357.925	308.158	353.15	312.201	481.095	267.236
ATP8A1	27.9093	21.531	25.8322	25.678	29.249	23.7957	36.0028	37.3337	37.155	35.2248	33.8422	27.9518
ATP8B1	35.6504	32.548	32.2615	31.3621	30.4255	30.016	38.7358	41.5613	43.3569	43.2275	44.0882	40.6563
ATP8B2	250.022	255.613	228.523	254.577	247.395	266.673	249.671	240.82	235.837	234.075	233.366	251.392
ATP8B3	2.43799	2.34796	3.15561	4.60792	4.42626	4.62502	4.38063	4.78052	3.63874	3.52345	4.19476	3.23894
ATP8B4	2.75709	2.46587	1.28521	1.39591	0.92449	2.55282	1.53965	1.63985	1.6684	1.5881	1.83719	1.44614
ATP9A	88.0085	85.4364	84.7597	94.4983	105.099	104.407	79.4675	84.3911	87.9197	77.9282	80.2293	87.5127
ATP9B	54.2597	56.3057	59.1405	54.1805	67.3817	61.1649	95.3199	86.682	92.1608	81.3097	79.184	70.71
ATPAF1	133.95	137.282	129.155	149.232	140.482	143.677	130.877	127.414	127.088	138.943	134.374	146.231
ATPAF2	22.2536	25.0166	21.101	18.5128	15.8599	16.9342	19.7731	20.0943	19.2626	20.051	18.2773	18.4457
ATPIF1	138.907	146.567	146.087	153.182	134.292	149.731	134.886	126.097	119.809	131.903	148.817	136.33
ATR	64.0546	53.88	59.4206	83.8264	92.278	82.6253	85.8566	88.8074	95.1947	84.2854	71.9774	72.2247
ATRAID	74.4374	90.0915	76.3389	81.972	77.2218	77.8628	78.7036	74.457	72.1917	79.643	80.2254	86.187
ATRIP	24.9073	21.7665	21.421	22.8577	21.808	20.5186	15.8444	18.7534	14.1661	19.4507	18.2758	17.0096
ATRN	56.928	56.5149	52.4044	64.9143	76.4595	69.9438	57.7372	59.3249	60.8819	52.8796	55.8496	52.7414
ATRNL1	1.45361	1.47202	1.19567	2.0476	2.01555	2.0354	1.27276	2.44239	2.07089	1.78401	1.88972	2.15321
ATRX	164.083	138.136	187.5	171.832	214.731	194.991	168.953	191.588	203.39	170.962	159.829	137.327
ATXN1	7.79293	6.0548	6.47953	9.02275	12.1428	10.4376	8.46297	10.1203	10.7729	10.2146	10.1216	9.17247
ATXN10	102.259	113.308	109.83	101.886	104.47	96.7696	110.385	114.2	109.783	121.266	115.284	117.63
ATXN1L	71.2268	64.866	61.8816	72.4752	74.764	71.2132	68.9639	67.724	70.4946	73.1825	70.7765	71.1754
ATXN2	125.541	119.004	130.854	127.083	133.148	130.513	117.603	121.957	126.235	117.892	118.863	98.8498
ATXN2L	234.936	245.783	230.922	214.252	211.98	240.35	222.582	232.624	219.656	204.148	218.641	195.635
ATXN3	54.6536	48.9021	62.0581	51.1511	57.4583	52.8379	50.5132	53.0722	57.4963	47.1456	44.9636	39.3072
ATXN7	34.6175	29.8321	29.6877	39.347	36.6549	41.1677	34.4543	38.1362	37.0564	33.4408	33.8255	33.8532
ATXN7L1	16.9781	15.4349	16.5789	18.7051	20.1555	19.7249	17.0336	16.5385	17.5078	16.2459	15.8171	13.956
ATXN7L2	10.7567	9.68463	11.8751	8.24572	7.031	10.103	11.0608	10.8512	8.34383	9.03394	9.91581	9.29069
ATXN7L3	64.0169	67.2826	62.0744	68.1914	68.3882	65.1698	65.3139	63.7464	56.3387	57.5819	56.9256	64.2772
ATXN7L3B	261.707	267.053	249.377	274.2	283.021	269.117	258.859	260.742	252.347	264.262	257.369	274.015
AUH	9.88453	11.6302	11.2582	9.51855	11.2027	10.4361	8.68271	9.35086	10.8398	10.2865	10.518	10.2078
AUNIP	13.7082	10.8158	11.0963	12.0329	11.318	11.2237	10.6026	10.6526	9.87287	11.0408	10.263	11.4222
AUP1	116.945	133.34	129.608	106.661	97.4777	104.529	123.365	119.514	109.962	125.958	123.821	125.399
AURKA	65.989	67.8851	60.4323	61.5968	57.3254	56.4811	81.4744	75.0725	75.4106	83.5678	84.8697	85.4477
AURKAIP1	91.6935	119.761	108.38	74.7096	66.6539	82.8223	93.9613	87.5073	79.6586	85.7845	87.9175	96.9342
AURKB	67.3499	75.1125	73.1186	56.4142	58.2821	62.0251	73.1655	67.5353	63.4699	74.3771	76.6818	72.516
AUTS2	14.8849	14.3108	14.7668	26.2867	28.6865	28.8657	4.75613	5.47793	5.66952	4.63084	5.74073	6.1805
AVEN	10.5823	11.414	10.8341	8.46708	10.2653	8.69671	11.1714	9.80445	11.1608	9.56535	10.237	11.3243
AVIL	2.43026	2.32743	2.83314	2.27832	2.82576	2.71199	2.11399	2.7442	2.25962	2.63047	2.05462	2.053
AVL9	118.658	108.983	108.955	132.447	144.5	131.498	121.695	125.121	124.212	125.871	118.969	121.219
AVPI1	1.27917	2.46439	1.735	2.43498	2.53116	2.5165	0.884862	1.81435	1.64024	2.04972	2.12768	2.07346
AVPR1A	40.5159	36.1792	38.4194	34.2885	37.7792	36.0268	73.215	73.3898	76.1271	72.8612	70.5454	75.7999
AXIN1	54.3649	65.2416	57.2549	52.7948	51.7013	54.1417	56.1887	51.7089	46.2833	48.9275	54.557	53.87
AXIN2	4.47711	4.79908	4.164	5.7554	6.74976	5.77314	2.70596	2.72152	3.851	3.37824	3.49261	3.30956
AXL	1.7578	0.948917	3.10244	2.82878	1.77535	1.22625	1.74091	2.32426	1.62852	0.899932	1.02637	0.815243
AZGP1	180.556	195.951	195.09	98.5159	97.3553	98.7599	250.547	238.481	255.718	252.464	308.112	271.613
AZGP1P1	9.50428	7.11231	8.64465	3.53186	2.67237	3.6763	12.4381	11.381	14.0694	11.8777	10.4177	9.76053
AZI2	31.8674	26.6816	31.304	37.126	36.0071	33.6776	38.8448	38.9692	38.904	39.7338	41.0452	38.3592
AZIN1	217.485	199.43	203.357	233.922	240.976	226.668	212.917	217.515	224.224	234.115	222.592	239.72
B2M	77.5402	77.0198	71.8987	81.1173	73.5943	71.069	65.0023	65.1851	66.8645	71.3008	80.4111	74.8053
B3GALNT1	15.8145	15.1325	15.388	12.6801	14.4013	13.6928	23.3396	23.2936	25.0667	27.6607	22.427	23.5681
B3GALNT2	31.6379	28.663	27.0272	29.5453	29.1183	29.0586	30.6647	32.1398	33.2938	31.8427	30.7296	34.5255
B3GALT1	1.67808	1.4856	2.03071	0.783734	0.905549	0.725119	2.76321	1.82515	2.60619	1.84175	3.01149	2.37873
B3GALT4	2.09631	4.36673	0.959067	0.283712	0.827679	0.829312	3.20762	2.04769	0.445982	1.97957	2.97073	2.22207
B3GALT6	35.7006	46.1317	42.4496	33.5363	30.5614	33.3436	44.7408	38.7642	33.7319	37.692	38.6596	42.3863
B3GAT2	0.755265	0.644696	0.958752	0.652126	1.73172	1.58186	0.758024	1.64165	1.09285	1.40941	1.40228	1.39901
B3GAT3	37.209	40.9191	39.7137	36.3223	32.0444	36.6493	35.5175	33.7974	31.9826	32.8115	31.1922	36.8017
B3GLCT	19.6528	18.4181	17.3114	17.2109	15.7963	16.2832	22.1215	22.2606	23.1416	23.2681	21.9994	24.5226
B3GNT2	8.02391	7.912	9.17621	11.7875	9.56216	9.58489	9.45696	9.17641	9.62749	10.1727	11.4413	9.49006
B3GNT4	3.2596	3.56584	4.63653	2.20462	1.90461	1.74437	1.88744	2.54995	2.03325	1.97787	1.63218	1.9397
B3GNT5	10.1222	7.34467	7.6781	1.36028	1.99091	1.75774	8.53881	6.91584	7.82218	8.24144	7.01824	6.67406
B3GNT9	1.3959	2.39963	1.93607	2.03609	3.57277	2.94706	1.31014	2.57717	1.6998	2.24831	2.58808	1.37151
B3GNTL1	5.19517	4.83621	7.00902	6.50016	3.85986	3.041	5.2995	4.20547	4.27345	3.35249	5.12574	1.63191
B4GALNT1	22.3133	21.9429	19.358	26.8026	26.8709	29.959	22.5895	20.0105	21.7979	22.9289	24.5348	25.5388
B4GALNT2	7.16	5.6502	5.68027	6.07068	6.87054	7.11983	7.57514	5.89306	7.69888	6.0506	4.53667	3.73299
B4GALNT3	13.0825	15.089	14.7282	22.9109	25.8741	24.6469	16.7571	15.2126	16.8303	14.8794	15.8974	15.4712
B4GALNT4	81.9834	91.0528	86.7499	78.196	75.1848	84.3766	80.2459	80.1453	72.1705	70.7532	71.1369	67.1083
B4GALT1	56.1401	55.211	51.1121	50.673	50.3524	44.9941	54.6978	55.2989	51.5002	57.5868	58.1969	61.5101
B4GALT2	114.835	141.767	122.876	97.5651	91.6842	93.8875	119.456	101.569	96.5245	103.852	107.388	118.825
B4GALT3	86.8327	101.224	88.8442	83.4177	76.7752	81.4059	87.2597	85.0104	79.4488	89.8827	92.5613	94.8011
B4GALT4	26.0374	23.7658	24.0474	28.8288	32.4145	28.1773	20.1204	23.3427	22.2867	22.3022	22.2244	22.1509
B4GALT5	41.9174	43.2637	38.4382	49.1914	43.7433	46.6871	41.5375	40.0519	42.4572	42.8983	41.3996	45.9323
B4GALT6	10.8148	7.34994	6.90144	9.29719	10.4996	10.8431	10.01	10.0487	12.908	11.7289	9.67494	11.4439
B4GALT7	13.315	13.8352	13.1474	10.8467	11.9996	12.5825	11.2267	10.921	10.5546	9.71718	12.2844	10.7262
B4GAT1	16.5711	17.856	16.5403	16.4361	12.3746	16.7643	18.3609	17.4456	16.0102	19.5103	17.1419	17.9434
B9D1	5.04844	5.51844	4.57387	5.2312	5.8859	5.20357	3.04126	4.65302	3.8775	3.8229	3.34243	4.08084
B9D2	3.44894	3.80969	3.00733	2.8777	1.78255	2.07241	2.37807	1.95391	1.74764	1.97849	2.12768	2.07346
BABAM1	60.7623	76.0002	70.7642	58.8938	55.0811	59.6742	63.2285	59.5638	55.7185	57.6246	63.1342	61.3996
BABAM2	29.828	32.0541	31.577	30.1605	29.6611	27.4681	34.2884	33.1194	32.5552	35.4905	36.3713	39.3015
BACE1	88.1585	86.7931	83.9419	89.9364	96.8166	96.4753	86.9295	88.3045	88.2117	84.1316	87.9924	86.9405
BACE2	16.7854	20.209	14.5227	18.0602	18.2894	16.1321	18.7322	21.4428	19.7263	20.4378	20.9687	23.414
BACH1	24.2583	21.4848	20.1117	20.5069	20.8553	17.7227	27.6559	29.7116	32.0203	27.3614	28.3506	28.639
BAD	38.2395	47.1018	43.2899	40.2897	34.4243	38.4709	34.2543	34.1228	28.5482	31.0431	33.0362	37.9061
BAG1	124.624	134.808	138.305	113.395	100.89	112.501	109.486	94.7331	90.9855	99.5875	93.4133	104.786
BAG2	16.985	17.6259	17.3207	18.6937	16.3569	16.4988	13.9362	15.2203	15.488	18.8047	15.8042	17.8065
BAG3	25.9324	25.8545	24.0586	25.0139	27.2803	27.7555	20.6836	20.3067	22.4285	17.7263	22.16	21.8909
BAG4	37.5412	35.5137	35.5096	37.7384	40.4801	36.4522	37.6477	34.5982	37.259	38.2579	34.9261	39.7515
BAG5	75.1899	70.2138	74.0104	83.653	75.9003	73.8963	87.3504	85.0151	93.5674	94.3078	90.6615	89.8269
BAG6	156.229	172.351	158.882	156.823	150.404	153.453	113.977	115.709	136.186	125.618	158.571	113.937
BAHCC1	150.613	152.057	148.975	77.0283	85.9657	81.8971	214.412	221.985	215.727	185.348	198.562	175.248
BAHD1	33.1655	35.7121	35.8959	44.9918	37.733	42.1436	29.2004	32.0008	27.9554	28.6961	31.3532	31.876
BAIAP2	44.713	50.4984	45.8811	51.854	50.3888	53.0314	47.4507	45.7076	42.8602	39.7797	45.5244	48.4472
BAIAP2-AS1	24.017	26.9609	29.2291	38.3614	38.4427	42.0128	24.1453	22.1216	23.3519	21.9272	24.3833	25.9455
BAIAP2L1	75.9349	80.7469	72.6842	86.0523	87.6253	89.874	80.7834	76.1639	79.1196	79.5184	80.8127	82.0382
BAIAP2L2	18.8969	23.5631	22.6321	20.2546	22.1711	24.7209	27.0436	26.2382	24.354	20.9906	26.6964	24.3631
BAIAP3	25.9534	30.3281	27.8057	43.2911	36.8937	44.7598	21.4658	20.6458	18.7783	19.5777	17.4569	15.336
BAK1	30.5091	35.39	29.939	28.8068	28.0337	28.7411	33.297	31.5732	29.149	33.0598	27.102	33.3527
BAMBI	2.73278	3.28586	2.50611	2.0476	1.68744	3.10861	3.37354	3.27978	1.9255	2.92275	2.60942	2.59182
BANF1	136.697	155.732	141.769	122.081	105.606	117.979	120.618	112.664	110.467	117.745	130.953	130.349
BANK1	3.7812	3.24262	4.51128	4.53791	5.86392	6.0692	2.44319	2.4797	2.68416	2.08866	2.85509	2.56049
BANP	20.7415	21.6437	19.338	17.7422	15.356	17.711	17.8042	20.9077	16.9723	19.2128	19.1895	19.1524
BAP1	91.4577	102.297	92.5378	94.8535	89.4853	91.0427	98.3887	88.5541	88.4686	89.397	93.2177	98.3342
BARD1	25.2346	20.5798	21.3598	28.777	29.249	25.313	22.4534	18.1784	20.61	20.687	19.1893	20.615
BARX1	1.27917	2.29145	1.46511	1.71555	1.73431	1.85036	0.553039	0.55826	0.606176	0.986901	0.883189	0.637987
BASP1	32.2119	35.0636	31.4999	42.1141	34.6862	37.7844	16.4246	14.2007	16.5807	11.7289	14.7733	16.2687
BATF3	6.97731	10.5493	8.98343	3.70781	3.28113	3.47869	5.08795	5.33837	5.59821	5.80753	6.98522	6.97798
BAX	58.0417	68.9243	67.2294	57.5576	47.0009	54.3959	56.0889	54.773	52.7725	57.1206	57.2116	59.8504
BAZ1A	172.21	156.933	179.535	154.158	158.992	150.787	176.328	179.222	189.567	177.616	179.103	166.599
BAZ1B	326.422	308.438	330.999	322.629	341.941	325.886	305.056	321.732	319.668	304.99	315.499	307.231
BAZ2A	401.793	377.514	386.095	396.319	469.551	459.521	369.277	395.739	406.574	343.96	353.574	342.924
BAZ2B	36.5074	30.2118	33.9198	28.6877	37.0783	32.4762	33.6787	37.3835	42.0011	33.7185	33.5661	30.7564
BBC3	31.3979	44.6185	36.3578	37.7422	33.6082	33.8247	42.0309	33.1467	32.6978	31.8465	35.4079	35.8469
BBIP1	10.4568	10.7361	12.0069	12.726	13.8309	12.0125	9.15398	14.3968	13.0658	11.9009	11.6442	9.22436
BBOF1	2.14463	1.38904	1.10803	2.86543	3.61199	2.95572	1.62313	1.81093	1.76987	2.07924	2.25521	0.939863
BBS1	28.2453	33.4321	36.9527	31.9565	31.0465	40.1082	39.6219	32.0917	30.4381	33.3928	34.9344	39.3289
BBS10	40.0614	37.3982	39.5965	38.7936	40.7329	39.1907	42.5287	41.9393	47.8166	48.0165	46.8893	43.6622
BBS12	1.86062	2.81027	1.46511	4.03985	4.03111	4.21883	1.10608	1.70967	2.03247	2.16359	1.72623	1.79434
BBS2	48.953	45.8991	45.8543	47.4579	46.938	44.9185	50.6257	50.289	50.4842	50.814	51.6086	53.3839
BBS4	27.1534	28.6215	26.6419	31.378	35.2019	33.7136	26.2693	26.3429	28.205	28.1267	27.9409	27.5929
BBS5	13.7026	18.4862	17.7626	13.8551	15.035	15.4483	11.8873	13.304	14.0672	12.9375	13.7431	12.9566
BBS7	20.1761	20.796	19.5091	23.4643	22.1711	24.6469	23.1723	24.075	25.1385	23.7995	23.9665	23.127
BBS9	11.7451	10.0305	9.25332	12.0089	13.2652	10.14	11.835	12.2468	12.5871	12.0326	12.3647	14.3547
BBX	137.162	115.135	135.908	197.067	224.289	210.386	126.093	133.215	140.062	125.602	122.603	120.899
BCAM	53.9081	61.6485	59.7072	101.142	88.6611	102.611	32.5479	31.3729	25.405	27.8447	31.6874	26.8877
BCAP29	24.1858	22.0219	25.2214	24.2712	24.9564	23.62	23.6994	25.2076	25.6879	27.1324	25.3856	24.301
BCAP31	121.173	138.871	128.737	143.276	122.902	134.67	114.313	115.229	109.731	118.694	119.196	137.367
BCAR1	51.574	59.7507	51.7029	47.0201	39.983	45.0749	51.3773	47.801	45.0353	48.0925	50.5827	52.5143
BCAR3	4.25455	4.03367	4.4492	5.38154	4.57008	5.11554	2.80714	2.14409	2.27071	1.59608	2.65181	3.17726
BCAS2	26.8561	27.6223	24.4319	23.1307	23.9979	22.7216	28.0886	26.6537	30.2717	29.6356	28.8241	28.2249
BCAS3	9.44589	8.52001	9.7312	9.50453	9.00421	10.3754	8.75377	7.89752	8.65787	9.95874	10.7333	9.39653
BCAS4	4.77153	5.49086	5.02784	7.03891	7.20551	8.58448	4.9959	5.47884	5.35773	3.84103	3.8823	4.11116
BCAT1	2.97344	1.04487	2.57843	2.94843	2.45678	2.87543	7.18391	6.89852	7.79487	7.5448	7.70783	5.97788
BCAT2	135.72	156.877	136.342	121.043	106.242	126.477	122.458	116.016	105.176	112.213	117.55	133.145
BCCIP	96.2667	94.0983	99.2259	90.0138	85.6278	88.071	95.0793	97.1261	100.338	104.64	103.064	104.475
BCDIN3D	14.3192	19.3602	16.9008	15.404	15.9555	14.6584	13.6262	16.1784	17.3913	14.1884	17.1006	15.7312
BCDIN3D-AS1	5.14364	4.00424	3.83419	3.82995	4.51896	3.15069	5.68257	5.07493	5.6997	4.11683	4.70447	3.67587
BCHE	24.595	25.0763	22.555	14.9419	18.0931	14.1368	37.2748	36.4963	39.9363	46.8399	47.1302	48.7263
BCKDHA	46.5911	42.2931	36.553	38.4631	36.9967	40.1289	36.87	36.3581	39.6154	34.8285	42.7748	53.4158
BCKDHB	43.5665	37.5456	37.5715	42.5091	42.362	38.8174	49.9026	47.7828	50.0262	50.2284	48.3599	51.5077
BCKDK	48.8993	54.9516	52.7054	49.6403	44.9984	47.8504	44.5749	44.8702	39.0092	44.031	48.3345	50.0022
BCL10	15.6785	13.6932	13.3996	22.0139	17.1912	19.4673	13.3485	14.0593	14.1388	13.8546	14.2371	15.8337
BCL11A	4.31374	3.59412	4.84189	4.71255	5.77425	5.62511	8.97703	6.95062	7.73891	7.04093	8.96851	8.45333
BCL2	15.3501	16.6455	15.6535	17.5983	18.1869	18.6147	18.4715	17.4107	18.6845	17.7263	16.4193	18.6213
BCL2L1	39.1728	51.7114	41.9033	37.6328	36.3613	38.1178	39.3033	40.497	39.7471	40.1227	44.5971	41.9294
BCL2L11	28.0027	25.4681	24.6058	21.0851	21.4152	19.6128	29.3278	31.9994	31.3521	32.1294	32.9349	32.8975
BCL2L12	29.1799	37.6571	30.5239	23.5272	21.693	25.2375	30.1407	27.7018	26.4472	25.0773	30.2273	28.6273
BCL2L13	82.7519	86.7289	79.1297	78.4346	73.5438	74.3018	84.758	85.4447	83.805	87.5965	88.9315	95.7807
BCL2L2	49.2137	53.2436	49.1621	61.8467	61.5042	62.1314	55.775	53.3539	57.9957	56.0915	59.3928	57.9038
BCL2L2-PABPN1	15.2571	10.633	15.422	14.1275	17.7484	20.9403	21.2636	20.4604	13.3713	16.7807	9.83583	14.2875
BCL3	8.19834	9.33875	8.4051	8.46708	6.51539	7.80854	13.6047	11.6886	11.446	11.8428	11.642	12.7996
BCL6	28.607	32.0803	30.5745	29.5518	29.9989	32.8625	23.6147	25.1915	25.1695	25.4947	27.2986	26.3967
BCL6B	7.6169	9.98728	8.59788	5.03598	3.28113	4.25584	10.0653	10.4674	10.0554	7.85725	8.63117	8.61283
BCL7A	46.2695	46.9621	47.0302	31.6542	28.8973	30.8447	42.1614	40.5484	39.1352	39.7622	43.276	44.9986
BCL7B	66.4535	74.3048	70.681	57.8886	48.0965	56.359	64.1679	60.4422	56.8896	60.318	66.0821	67.629
BCL7C	52.7182	64.7984	61.6657	60.0286	51.5741	58.8028	52.2429	45.8709	42.5158	44.8545	48.2225	54.0682
BCL9	73.6107	76.3962	72.7542	82.8446	85.0751	86.6711	69.351	68.3869	70.6373	64.2625	70.7354	72.7305
BCL9L	157.78	154.945	131.38	173.756	166.388	191.887	169.441	165.859	158.636	157.984	175.598	175.048
BCLAF1	287.686	225.504	255.401	288.367	312.595	288.457	287.138	308.143	332.852	317.395	318.92	298.526
BCLAF3	20.3524	16.1234	19.7805	26.6896	30.5449	27.6305	16.0136	17.4788	20.2701	16.6953	16.9044	14.711
BCOR	150.826	150.285	139.34	155.728	167.713	169.382	143.348	143.857	143.485	138.204	143.318	150.924
BCORL1	71.0523	73.7588	70.9421	81.0737	81.9815	88.7805	57.2395	54.6746	55.055	47.3713	50.944	50.8795
BCR	81.7602	87.5035	77.5553	74.5896	68.5809	76.0547	76.3959	71.1021	66.6075	72.6651	72.8776	77.0863
BCS1L	42.6627	45.8241	38.3345	34.6509	34.412	35.4648	41.4544	39.8746	36.7406	40.9248	33.4684	37.5065
BCYRN1	26.9503	30.3509	32.2044	40.0111	27.3272	31.3493	16.3146	17.0362	16.3311	17.3246	18.4802	16.5478
BDH1	72.6114	76.3242	72.1631	66.7926	64.7721	65.2241	73.5756	71.8547	68.5731	69.568	66.9296	74.259
BDH2	19.1876	22.4806	17.9342	22.7449	21.3742	20.3851	20.3518	19.9578	17.8044	20.0417	17.6317	21.5321
BDNF-AS	4.06453	5.49916	3.42208	2.68109	3.80184	3.78547	3.48843	5.03989	4.2062	4.00912	3.94559	4.80113
BDP1	213.804	159.883	198.41	177.021	221.358	187.771	171.095	194.708	223.587	171.991	166.854	145.754
BECN1	61.7986	61.8014	62.5005	50.7316	54.4311	54.093	76.654	72.7192	77.9914	79.4478	81.5026	76.718
BEGAIN	1.42952	1.68755	1.40704	0.727423	1.22426	1.11541	1.17158	1.91104	1.69028	0.88817	1.18373	1.14666
BEND3	75.0061	71.2512	68.2046	53.8462	49.8732	49.4047	75.8769	77.8322	76.8417	74.1694	77.9214	86.1283
BEND4	3.19794	2.98321	3.27722	3.87383	4.45297	4.40387	3.98188	2.86108	4.38586	3.94761	3.69334	3.5488
BEST1	3.75706	1.97723	3.00031	1.64998	1.62811	1.56035	3.6709	4.36579	5.25742	4.63037	4.01987	2.75343
BET1	20.5789	16.9211	21.9955	23.7415	23.0915	23.2021	24.0667	23.8468	23.5337	28.1842	24.3538	23.8697
BET1L	46.3242	53.2683	45.976	51.5441	48.0998	48.2564	41.6428	40.4438	42.1962	41.5375	38.3528	46.0217
BEX1	29.5568	33.1822	32.4497	40.7087	40.1161	38.0195	25.8008	24.4885	26.0979	26.8847	31.2087	26.7732
BEX2	27.3882	31.3843	28.2804	38.3037	39.8319	39.6346	23.3317	27.3332	26.3462	28.3585	30.976	28.8712
BEX3	95.3566	107.007	105.411	122.745	107.574	114.649	102.644	99.7542	95.1339	102.03	119.07	109.694
BEX4	23.5267	23.6328	22.9739	52.0337	53.6409	50.1691	19.942	18.7285	18.4428	18.0532	22.9628	20.0368
BEX5	4.24453	4.88555	4.78088	11.6768	10.7809	10.7691	2.43337	2.68663	2.70996	2.73296	3.41232	2.87094
BFAR	16.6622	15.8095	17.9748	16.8608	16.1199	16.2424	16.3632	16.8258	17.2026	18.2238	17.2482	18.1166
BFSP1	2.09319	2.46439	0.307639	0.719425	0.57226	0.666131	2.48867	2.56415	1.77086	0.376656	1.6363	1.282
BHLHA15	8.1402	10.7655	8.17377	2.54566	2.43741	3.21963	11.6138	11.549	9.12829	8.76824	10.7589	14.275
BHLHB9	7.70183	6.64473	6.34802	8.38949	7.8547	7.92283	6.67159	6.4247	8.54349	7.64413	7.57955	8.24055
BHLHE41	2.15134	1.94557	2.31333	1.21749	1.4062	1.09324	4.14779	2.89598	3.26311	4.06148	4.3758	3.46386
BICC1	13.3466	10.4597	11.205	2.61026	3.36612	2.7814	20.682	21.285	19.292	21.6499	22.2266	23.0911
BICD1	32.1131	26.8489	32.3024	30.7139	33.0419	32.3517	32.5187	35.8333	38.2295	34.7272	30.7912	30.6633
BICD2	53.4927	51.2767	48.2715	48.0355	46.0765	49.4047	50.603	47.1032	50.5978	49.0414	48.9769	50.9194
BICDL1	35.214	36.7183	36.0986	28.0939	26.217	29.4736	26.1085	24.5563	24.2822	26.1254	24.9001	27.1337
BICDL2	23.2755	21.8199	22.9519	30.9409	33.0687	34.1139	18.1146	19.0856	18.4069	13.6698	16.84	11.3244
BICRA	28.7253	34.5578	32.413	30.8741	26.8115	32.5267	26.129	27.5698	23.8444	20.5248	27.2519	23.6598
BICRAL	56.6907	49.4608	52.2427	53.7355	59.2479	60.1739	59.0645	62.8043	65.36	61.8332	63.5896	60.6088
BID	5.3036	6.52201	6.05918	8.70228	9.608	7.11325	5.15348	5.02884	4.47129	4.4571	3.29	4.42776
BIK	4.30268	5.40437	5.08933	3.09906	2.90615	2.5535	4.2584	3.45424	3.20916	3.6819	4.29551	4.46591
BIN1	1.91876	2.63733	2.93022	2.10294	1.68744	1.92438	3.81597	4.18695	3.53008	3.4162	3.61305	3.90767
BIN3	9.65747	11.8786	11.2945	12.2455	10.3866	10.0214	8.52159	10.7162	7.33841	7.67581	9.69237	7.57771
BIRC2	41.7463	35.143	39.2383	51.2985	61.9101	51.9819	43.1278	42.8092	40.2203	44.2558	44.1972	40.469
BIRC3	1.16414	1.0447	2.13177	1.55694	2.447	2.23381	1.72364	1.60741	2.17634	1.59711	1.56809	1.83751
BIRC5	141.614	163.963	150.032	136.412	117.668	127.468	164.074	152.231	140.408	163.385	166.631	175.095
BIRC6	91.9843	67.2736	73.6796	80.4096	110.012	91.7411	82.9558	101.22	105.724	78.8003	65.918	58.9739
BISPR	1.42068	1.75875	1.64754	1.34347	1.58883	1.13165	1.26418	1.71338	1.77208	1.97023	1.67233	2.00882
BIVM	26.1418	20.7084	23.8879	23.6687	24.3897	22.2267	23.3483	24.8638	24.2775	24.845	25.1928	24.5669
BIVM-ERCC5	62.8084	58.3418	62.2346	73.4101	80.0668	67.233	71.8672	74.1153	81.4558	74.5673	83.3292	74.0323
BLCAP	50.5786	51.1667	49.8988	47.2057	45.6917	47.9202	48.9114	48.6956	42.4073	47.498	45.5858	45.0854
BLM	30.9937	29.7533	30.7906	22.1233	26.5603	23.3275	29.1766	32.2105	35.5919	34.8896	33.2591	31.1549
BLMH	44.7667	44.4575	42.0361	49.0887	52.0328	45.646	45.5775	44.0328	46.9378	47.5505	47.7359	50.6817
BLNK	5.37476	3.54527	4.81547	7.41561	7.05187	6.03165	5.6963	6.31023	6.7361	5.80461	7.1958	6.07064
BLOC1S1	46.7943	55.9929	53.1229	54.3976	52.3948	57.5382	48.1341	45.5083	43.0293	46.0952	49.223	48.3315
BLOC1S2	38.0833	39.418	38.2126	41.9772	39.4551	41.3483	41.5847	41.0026	43.2764	45.5341	40.0989	45.5383
BLOC1S3	17.501	20.0972	18.4165	16.056	15.5497	14.7512	18.4585	16.0784	16.744	15.5905	16.6382	18.2788
BLOC1S4	10.7567	12.4192	10.9436	12.3395	10.5465	11.3441	11.2267	9.62999	9.78409	10.2865	11.2774	11.723
BLOC1S5	20.6172	15.1598	18.3924	18.4516	17.8613	16.4736	19.962	17.8716	21.1004	20.3227	18.1521	20.842
BLOC1S5-TXNDC5	2.86382	11.417	5.07249	12.3093	15.0881	19.1409	15.5031	11.3823	15.9149	12.5905	21.1392	10.0919
BLOC1S6	201.13	177.484	196.102	215.614	250.817	231.78	262.581	274.402	300.33	265.009	256.242	245.916
BLVRA	40.5194	40.9867	41.1125	46.3275	43.7484	45.4079	29.7801	28.7504	31.6994	31.5808	31.0216	34.1301
BLVRB	37.4449	48.2502	43.4135	38.1849	31.452	40.671	36.5005	34.4377	31.5924	35.7941	32.7181	39.5951
BLZF1	56.0886	48.3464	51.9073	63.6931	61.569	60.9041	58.119	62.6636	64.3399	61.7018	60.075	64.6718
BMF	7.67505	7.3116	6.40164	16.4836	18.2862	18.5275	5.69814	4.50347	5.20871	4.17912	5.49986	5.18571
BMI1	62.1351	51.1235	58.3447	55.1982	59.9077	51.9617	64.3558	60.6918	64.2975	67.1831	62.5859	60.1204
BMP1	26.8627	28.4486	29.0323	22.2607	24.0779	23.4996	21.2168	22.5049	20.6645	20.1556	21.598	19.4586
BMP2	13.2569	14.1378	12.145	16.7128	15.8432	16.9493	49.6629	50.8366	45.2136	64.8698	62.2247	67.0684
BMP2K	49.0931	36.4891	42.275	57.4805	61.5959	57.2729	49.4151	51.0068	55.9462	49.3838	49.5338	47.0037
BMP5	0.581443	0.562816	0.963888	0.719425	1.21871	1.11022	1.82503	0.976956	1.53327	2.46983	1.40507	1.75446
BMP6	3.25608	3.41556	3.54711	0.940787	1.49995	1.36927	6.35994	5.5826	5.34861	6.30098	5.41957	5.02415
BMP8A	1.15997	0.63092	1.12371	1.45536	3.04478	2.34698	1.02812	0.922587	1.00544	0.781207	0.834137	0.507219
BMP8B	13.5934	15.4573	13.452	16.6539	15.7868	15.2757	14.1142	12.8621	11.3629	11.7734	12.5509	11.4582
BMPR1A	41.3581	40.116	41.8071	40.2736	38.1715	39.1511	43.4099	43.9936	45.1462	42.789	43.2515	44.5158
BMPR1B	14.4443	11.5866	12.7178	5.40012	6.25711	4.58436	14.9116	13.437	14.1343	16.3716	15.3372	13.4198
BMPR2	60.375	43.1182	45.0741	64.0131	82.5577	70.4569	54.3767	64.2052	70.6078	56.9309	52.7665	48.998
BMS1	132.434	120.295	125.518	108.739	115.922	108.521	131.839	131.752	141.171	137.688	136.599	134.104
BMS1P1	24.6691	20.3273	24.6616	25.9134	29.3482	26.7904	27.0001	31.0452	30.9537	22.9421	20.735	16.3116
BMS1P22	1.64017	2.58215	1.90201	2.05838	2.18713	2.0129	1.639	1.89529	2.20296	2.27191	1.20511	1.42464
BMS1P4	4.71266	3.20447	3.15406	3.40483	4.20701	3.83976	4.08852	4.8528	3.85446	3.83912	1.76737	2.40095
BMT2	4.76783	5.23143	5.43633	9.24185	9.28092	7.54949	6.13873	6.07108	5.70518	5.92141	5.45972	6.61912
BMX	0.523299	0.734994	0.732555	2.76702	3.74987	3.0346	0.71895	1.11652	1.4263	1.13873	1.20435	0.877232
BNIP1	8.31463	11.0249	11.7594	10.5147	9.79653	12.1384	9.95469	9.73467	10.9112	10.5902	10.4778	10.6065
BNIP2	59.0481	48.2646	49.3599	67.6641	72.4324	65.8976	57.9954	60.1723	61.0743	61.5483	58.027	52.2995
BNIP3	36.3562	35.8121	31.8753	20.7194	19.9981	18.3892	32.8029	34.3831	35.7881	35.0069	40.9862	35.5168
BNIP3L	44.2256	40.2951	42.1412	59.1589	56.1261	54.8034	45.8489	46.8241	47.5313	44.1644	56.8854	53.5112
BNIPL	1.08887	1.42583	1.66012	1.71273	1.5051	1.41381	0.713165	1.51027	1.02889	1.10772	1.09662	0.621581
BOC	3.36896	2.80478	2.52616	1.5361	1.29953	1.30063	3.61105	3.46801	3.43402	4.17623	3.35444	3.55089
BOD1	44.2478	52.7033	49.5824	42.4461	41.2485	43.1505	47.2848	49.8945	45.3562	49.7626	52.9512	54.5878
BOD1L1	73.1009	69.2086	75.104	75.0209	90.8832	81.8665	65.0324	76.5085	81.0785	61.6114	63.459	54.4335
BOK	29.421	40.2056	35.772	37.6709	32.6361	37.914	39.4305	33.2151	29.1321	30.2903	31.3532	35.0095
BOLA1	24.3043	29.7457	26.1406	25.4012	21.3274	26.0901	27.8731	27.0058	26.1012	27.861	25.211	26.7556
BOLA2	21.3664	27.0808	21.7018	23.888	17.575	22.6272	21.2595	16.1876	15.9255	16.6474	17.4283	17.6765
BOLA2-SMG1P6	25.5817	32.3834	26.7929	29.718	26.4512	31.5367	32.6244	28.3792	27.1362	26.6107	25.1424	29.41
BOLA3	44.5269	47.1209	40.7281	36.2942	28.87	31.8586	35.9712	37.3113	38.0399	41.352	37.5521	40.2627
BOLA3-AS1	14.4198	14.0081	13.4173	18.1517	17.6712	14.9509	11.1161	12.6655	10.8398	13.513	12.6055	11.2844
BOLL	0.698696	1.10212	1.12581	0.719425	0.806827	0.712706	2.48232	1.03232	1.24405	1.35182	1.6058	0.677861
BOP1	114.662	136.795	129.202	102.882	89.8108	99.183	112.267	109.461	95.7757	96.1849	92.9356	103.992
BORA	24.3331	20.2325	22.9084	23.1572	24.2269	25.606	28.8135	30.3617	30.6638	32.6095	34.1028	34.2094
BORCS5	9.28114	7.70871	8.63764	10.9185	11.648	12.1974	8.18811	9.24938	9.16891	8.83375	7.63106	9.14719
BORCS6	20.4086	27.8001	22.5164	28.8324	24.6085	30.0499	25.4951	23.6912	18.0426	21.1425	24.7694	25.9581
BORCS7	19.8364	17.639	18.8988	25.5087	21.327	21.6187	18.4335	19.1978	18.583	18.5064	18.4911	19.324
BORCS8	20.8324	23.3312	25.3218	20.3371	19.8474	22.8872	20.2466	18.5118	20.9768	18.2416	16.7464	15.6031
BORCS8-MEF2B	3.48226	1.3433	1.91508	3.37611	1.9401	1.66372	2.18134	2.27301	0.904776	2.5787	0.555242	2.22774
BPGM	22.56	23.001	20.7429	19.8672	19.2181	20.428	26.0481	25.4357	24.1044	24.293	24.93	26.636
BPHL	27.2907	24.4523	26.9478	31.3027	28.3299	28.8029	23.9107	23.1524	21.7443	27.5892	22.2493	22.0214
BPNT1	83.9408	85.3075	82.2341	90.6793	87.9623	84.0499	93.3446	90.3568	88.8342	101.137	97.7746	102.263
BPTF	118.747	108.232	123.655	116.076	141.89	127.051	119.793	127.953	135.643	115.366	113.479	105.707
BRAF	81.7909	61.7139	68.6618	74.8519	83.1059	78.2334	88.9517	91.4555	106.992	84.813	81.4431	80.4373
BRAP	42.1091	38.2837	40.1188	45.0666	44.8649	43.8348	38.828	41.8124	39.625	41.974	44.1193	41.8533
BRAT1	94.177	107.585	96.398	88.7235	83.209	94.1195	93.1342	89.0934	78.7725	83.2909	75.7341	80.5524
BRCA1	164.282	143.612	145.017	164.074	176.518	168.688	142.166	144.24	156.825	151.616	142.07	139.515
BRCA2	47.779	33.3053	40.9431	46.2972	54.2184	48.6654	40.9096	47.5296	53.4314	44.0357	39.6133	34.8723
BRCC3	48.6534	42.3733	45.5394	42.4729	41.5005	42.3085	49.3713	46.8894	53.5542	54.9948	53.3831	52.3474
BRD1	75.9946	76.3962	69.3228	76.5911	74.013	74.5697	72.0609	74.0393	70.0311	72.6891	72.5018	74.8837
BRD2	176.534	160.073	135.746	165.938	185.075	173.624	174.674	174.146	150.625	151.295	167.628	151.893
BRD3	82.8586	85.0445	77.3877	81.8155	87.4085	86.6323	87.3445	86.5152	85.2269	77.5525	91.1217	91.8
BRD3OS	22.3395	25.9283	24.5723	31.4879	28.766	29.2766	21.4791	20.7515	20.428	20.1841	21.5013	22.0518
BRD4	177.805	203.204	197.134	168.29	171.744	178.671	169.23	169.606	164.06	149.315	162.708	142.71
BRD7	97.0875	93.9387	103.529	100.21	96.1681	95.3406	94.7529	94.384	98.4739	98.2011	105.325	102.214
BRD8	92.7287	93.2998	94.5716	105.424	109.942	107.658	105.016	106.822	105.447	107.08	110.927	97.3395
BRD9	47.2071	50.6002	51.0437	45.4297	44.7078	46.0082	47.7209	45.8226	45.3813	42.5213	43.9544	43.7192
BRF1	37.8725	45.1683	36.6374	49.3389	46.7643	52.5541	34.2188	29.5688	30.653	27.6079	32.4372	31.2643
BRF2	13.4988	13.6575	12.6456	11.1419	11.2496	11.2988	10.01	10.9906	9.49562	11.7579	11.6822	13.5884
BRI3	51.559	63.5151	58.01	49.7333	42.2134	46.9908	52.0504	47.3955	43.1801	48.2135	47.3161	50.8377
BRI3BP	223.343	208.859	199.22	206.305	200.158	200.374	227.462	234.491	222.275	245.046	215.097	247.604
BRICD5	10.187	10.1336	11.615	12.9538	14.4634	16.0416	11.6854	10.0524	9.69382	10.5635	10.6713	8.22859
BRINP1	2.38392	3.11292	2.62177	2.26896	3.23426	2.62752	1.16138	1.57011	1.06972	0.797113	1.28464	0.996855
BRINP3	0	0	0.0385555	0	0.0468733	0	1.76972	1.53522	1.46195	1.02486	1.08391	1.15635
BRIP1	65.2421	48.93	55.5111	65.8642	63.8309	61.875	62.8478	64.8948	69.6375	65.4442	61.1212	59.7226
BRIX1	71.3791	68.5318	74.7257	61.8487	62.4795	62.2726	74.1267	74.439	79.0347	77.6027	78.8122	76.5818
BRK1	86.2861	89.9287	85.4776	89.0427	81.0909	81.9341	90.8642	88.2051	80.3361	93.3381	90.567	93.2658
BRMS1	21.6297	23.3901	23.249	21.6381	18.9837	20.6131	18.1397	16.3989	17.6861	18.2956	18.9083	20.9738
BRMS1L	17.565	15.656	15.711	17.4746	17.8434	16.682	18.5596	18.3063	20.4716	21.1983	18.4787	19.6257
BROX	132.372	115.286	118.421	159.44	167.003	151.269	139.4	139.892	148.183	152.713	150.833	142.399
BRPF1	43.0268	49.4608	45.5341	38.7383	39.608	41.1151	41.0908	41.9742	41.4695	39.2863	42.5135	43.4629
BRPF3	76.6923	73.5427	72.7542	81.5718	80.8565	87.4112	66.4199	64.4442	64.0763	66.2363	70.6953	66.9887
BRSK1	3.25608	4.20963	2.96877	4.98064	4.64053	5.71058	4.45342	4.25727	3.95797	3.95173	4.3758	4.38695
BRSK2	2.61649	3.19939	2.23622	1.10681	2.06243	1.44328	3.37354	3.17511	3.13785	2.46725	3.33203	2.03358
BRWD1	113.165	81.5058	96.6969	123.765	153.818	135.018	106.338	129.977	135.04	112.297	99.3342	92.6116
BRWD1-AS2	1.27917	1.55646	1.041	1.32817	0.98434	1.25825	0.663646	1.01185	0.998407	0.759155	1.1642	1.03673
BRWD3	21.9525	15.5016	19.0415	16.4223	21.5152	21.2019	18.475	20.2959	24.0402	19.9552	17.3971	17.5615
BSCL2	9.74496	15.7973	12.9515	7.68467	7.44445	9.67491	10.322	10.6265	4.46936	6.91628	5.61575	5.44355
BSDC1	62.2411	63.6351	65.0523	72.0554	74.0571	70.2592	63.9324	66.4052	65.9148	66.1621	67.2205	62.4031
BSG	377.825	468.482	406.792	436.733	364.311	418.951	384.881	367.781	338.925	362.765	394.928	429.793
BSN	17.2107	18.4181	16.6174	8.68844	10.7809	10.6951	7.52132	8.23434	8.77172	6.87035	7.22609	6.65899
BSN-AS2	0.714866	1.00743	1.26386	0.635066	1.00688	0.953461	0.660924	1.62367	0.69897	1.21571	1.08547	0.734808
BSPRY	23.6066	23.6495	19.7019	20.476	18.9368	22.1674	21.0155	18.1435	17.6504	19.8899	20.6345	22.6884
BST1	0.852924	0.858427	1.11357	0.71646	0.625226	0.841203	1.4977	1.59159	1.30248	1.69166	1.62149	1.74541
BTAF1	86.635	65.8036	72.7157	91.4777	106.871	95.4048	81.905	82.0643	97.0237	81.7989	77.9214	63.9183
BTBD1	95.7187	88.7555	84.1025	67.068	67.0744	58.5691	103.844	105.673	110.568	113.095	108.767	110.227
BTBD10	25.2346	23.6928	23.0562	25.4566	26.9899	24.6839	23.2829	25.9242	29.1321	28.9997	27.1781	26.5562
BTBD19	1.81646	3.08784	3.5169	2.14129	1.89266	3.39372	2.23041	2.00023	1.99065	2.33362	2.52006	1.37211
BTBD2	151.718	184.412	162.148	132.978	121.037	140.36	139.391	128.732	116.224	119.887	135.414	132.415
BTBD3	30.1187	26.6102	24.8348	37.6455	34.0921	31.4521	26.4714	27.7896	28.2342	29.6671	26.3834	28.6587
BTBD6	52.6921	63.0371	52.3611	53.6377	49.1307	52.6745	56.477	53.4892	48.8418	54.5045	48.1678	59.0653
BTBD7	29.7335	25.4099	27.1451	28.9763	31.5391	31.6899	27.07	29.741	32.4883	28.4563	27.01	27.5517
BTBD9	28.9194	30.323	32.1711	30.1043	31.9165	31.2642	30.5809	28.9283	27.114	27.3775	26.1884	32.1354
BTC	3.19794	3.19939	2.39044	3.87383	5.06232	3.92277	3.26293	3.69848	3.10219	2.695	3.41232	2.71145
BTD	11.5687	11.962	9.8949	13.1077	11.5894	13.5065	15.0045	15.2277	14.139	17.7448	12.6457	13.9161
BTF3	342.169	361.662	345.83	369.416	339.768	335.719	357.132	347.354	358.632	384.579	406.358	395.771
BTF3L4	90.5138	77.3897	76.6004	92.2597	88.3371	86.6201	91.3301	92.8562	97.2766	100.711	99.9084	104.874
BTG1	262.36	270.327	254.927	220.995	210.669	213.659	150.619	147.355	146.295	150.07	164.483	165.172
BTG2	85.1232	86.9023	84.5137	73.7134	72.1849	71.4241	86.9377	79.8661	85.863	85.291	79.6075	88.7998
BTG3	35.9354	35.1317	32.9837	49.2113	48.1677	43.2672	40.9868	38.5111	37.9541	39.7776	40.3721	38.7803
BTN2A1	18.2619	19.6502	21.0716	20.9696	22.9959	23.945	22.4016	19.4054	21.4844	21.4323	21.7243	20.5178
BTN2A2	10.7693	13.7555	11.8142	15.5868	19.0073	16.2349	14.4039	12.8085	14.2892	11.9766	14.1101	11.983
BTN2A3P	1.96032	2.26808	2.18281	3.29943	4.36271	3.82755	3.40346	2.38629	2.90286	2.23377	2.42483	2.14989
BTN3A1	16.4644	15.488	15.054	19.9985	20.7668	20.4262	14.7796	14.2688	15.8887	14.9924	16.2296	16.4997
BTN3A2	32.4148	32.6376	34.4256	38.2013	40.2958	39.586	36.9536	33.1186	34.7449	33.9435	38.1096	35.7827
BTN3A3	11.5503	9.08113	9.6219	13.5054	14.3531	16.5236	9.70916	11.6738	8.89925	8.89606	11.7635	9.32877
BTNL9	55.833	53.2414	55.9438	42.9861	47.7632	49.5597	69.4031	72.104	69.9768	65.5142	68.8751	51.2479
BTRC	30.8746	29.3565	28.4154	32.7062	37.9674	36.0821	28.8686	27.3548	29.6669	29.9866	26.0139	28.7493
BUB1	94.0193	86.2537	83.8968	94.5768	96.6528	91.223	109.391	111.094	121.235	121.427	122.964	125.683
BUB1B	140.276	128.192	135.712	138.693	140.197	135.334	153.382	150.724	170.686	165.835	176.468	165.872
BUB1B-PAK6	2.18032	2.32797	0.101423	2.57284	0.0593705	0.057242	0	0.344147	1.59487	1.08785	1.53823	2.49395
BUB3	138.06	136.824	134.959	156.095	154.588	144.217	157.185	160.614	154.134	165.704	154.226	163.843
BUD13	23.6066	25.1627	26.9503	24.3498	26.2491	22.3154	21.292	22.5747	24.4966	23.1922	26.0541	23.4859
BUD23	94.8244	106.089	103.539	87.1464	75.0219	87.4492	97.107	94.8591	93.6148	95.7266	96.7542	96.5968
BUD31	66.199	71.8965	76.9053	71.4541	71.4096	71.815	70.7452	62.6218	68.164	70.8778	79.279	71.8988
BVES	3.93356	3.50875	3.54265	5.39205	7.19761	5.06427	3.91799	4.1996	3.99713	4.201	4.13319	3.746
BYSL	37.3868	41.1164	34.8542	30.7693	29.9052	29.4948	37.3854	34.1934	32.7335	34.0101	36.9334	39.3957
BZW1	297.591	265.75	271.698	434.553	422.879	379.56	274.699	285.115	280.566	305.679	284.17	311.229
BZW2	194.013	205.229	185.514	145.213	140.937	135.765	197.49	199.284	194.182	199.33	199.757	224.606
C10orf76	22.4277	23.3655	22.4033	21.9092	22.1637	22.8618	19.4944	23.9034	22.2183	21.6344	20.918	24.1314
C10orf82	8.44413	7.46135	8.94795	8.322	9.11019	10.0421	6.45643	6.18993	7.18543	6.83008	6.17469	5.993
C10orf88	14.6022	11.2269	12.5321	14.0192	15.0926	13.3369	15.3819	14.6855	14.4783	14.7524	12.856	14.3269
C10orf95	3.48375	3.33878	3.51183	4.38685	3.14661	3.84764	3.11357	2.91903	3.6367	3.05572	3.31838	2.47047
C11orf1	17.8966	20.479	20.4238	21.9216	18.8731	19.9222	21.4242	18.2406	19.4955	20.378	21.3422	18.9004
C11orf24	30.9328	34.5447	31.2685	32.9275	27.5615	29.6059	31.0808	29.3785	27.4391	29.9487	30.9518	31.381
C11orf49	20.915	28.0117	23.6983	24.108	23.9931	23.212	23.6113	22.2869	23.6377	20.9649	21.1896	22.9874
C11orf52	8.02391	8.3468	7.05566	11.6231	10.734	11.5833	9.73348	6.03712	6.70673	7.74338	7.11329	7.45802
C11orf54	28.2772	25.908	26.3687	38.1089	39.6507	37.4551	32.1696	35.6747	33.0637	35.6831	35.2566	35.4076
C11orf58	156.928	137.886	142.149	159.811	155.67	151.268	158.421	156.118	171.157	173.156	165.308	166.402
C11orf68	13.7221	19.2396	19.432	18.373	17.1088	17.7635	14.8767	14.2356	11.8026	14.4239	14.2515	16.6674
C11orf71	11.601	11.481	12.3245	17.137	16.4078	16.1227	12.7111	11.7502	12.7915	13.1195	13.3117	13.6657
C11orf72	3.92046	2.9756	4.84774	3.65246	5.28909	2.08441	2.99587	2.87196	3.34519	3.24731	2.7825	2.22574
C11orf74	5.17484	5.53408	6.70866	5.97676	5.57793	4.92197	7.02359	6.69912	7.59502	7.24993	8.31001	7.37673
C11orf80	15.3889	14.4681	15.8338	8.69488	11.3847	9.5341	12.0681	12.6123	11.8604	13.7954	10.5802	11.6132
C11orf84	30.4095	34.6312	31.4227	28.8877	26.2959	30.7901	28.4815	24.2843	23.4982	24.4448	25.1308	26.0379
C11orf95	25.2928	24.9033	24.7912	19.2607	19.4993	20.7611	28.5921	26.9361	27.0283	27.4434	26.576	25.1606
C11orf98	54.1834	60.1518	59.1156	47.1442	41.0063	44.5932	47.0789	42.6135	43.2553	46.1607	52.8941	48.2793
C12orf10	27.3844	34.7129	29.8606	26.0391	20.8706	24.8908	27.1693	23.9909	25.7014	25.7469	25.8001	29.2473
C12orf29	59.4881	50.9592	53.589	52.4181	52.1923	50.2676	57.4881	59.0642	60.9193	63.8617	56.4562	59.3479
C12orf4	41.2404	32.4961	38.1063	38.8361	38.8008	36.6861	46.3345	44.6837	47.6915	44.7721	43.2661	46.6872
C12orf43	44.0245	44.5336	40.337	39.6611	36.4955	36.8867	38.7578	39.2467	37.7983	36.9471	40.4356	38.4016
C12orf45	64.4288	61.0461	77.4079	55.7143	79.9361	63.5893	63.7239	84.7772	95.9133	66.1141	53.2574	60.3352
C12orf49	84.6179	78.3349	79.1754	91.0421	89.8984	96.6365	78.3567	81.2686	81.4825	82.2278	76.5015	85.4292
C12orf50	3.85311	3.85764	2.61638	3.72162	3.90451	1.97312	5.77731	7.93652	7.91605	5.58755	5.08658	5.78341
C12orf56	3.31182	2.75298	3.42889	3.96466	3.68229	3.90732	5.94603	4.89648	6.03974	5.11545	6.63899	5.6303
C12orf57	91.0593	119.948	105.449	97.6095	87.7168	103.795	103.899	102.465	89.4647	98.84	98.5978	120.847
C12orf60	3.7072	4.59388	4.55026	5.2201	6.04813	5.78466	5.56012	4.97159	5.66344	4.14532	4.90092	4.47268
C12orf65	54.4482	58.8861	64.9565	38.6665	39.1472	35.3805	59.7714	55.9322	56.3666	60.2547	56.1415	59.1872
C12orf66	19.5847	20.6652	17.9348	19.2931	21.3744	20.8457	20.027	21.144	24.3091	20.5752	19.0785	20.9886
C12orf73	25.4736	23.3001	22.1259	18.2487	17.6614	16.9288	21.1331	24.2076	22.3828	25.3081	23.1424	24.6446
C12orf75	67.3311	73.5859	65.5829	111.345	106.871	110.097	62.7146	58.7918	56.5526	62.4784	64.1918	72.8502
C12orf76	16.8218	17.9913	17.9412	20.31	20.8268	22.5248	17.8655	16.9502	16.0627	16.2328	16.796	14.3104
C14orf119	31.5719	33.2641	29.5469	31.9834	27.2192	30.2336	31.065	29.236	27.9487	29.2066	30.8088	32.8479
C14orf2	71.9334	78.3685	73.696	70.709	56.1289	62.7336	69.6886	62.3517	64.3208	71.7971	72.4245	70.0389
C14orf28	2.96536	2.42116	2.93022	3.59713	4.12485	3.51569	3.15232	3.14021	3.20916	3.87169	3.17145	2.79119
C14orf37	1.08481	0.390215	1.398	1.33898	1.41391	0.966628	0.926442	1.22988	0.642714	0.821402	1.1431	1.16704
C14orf93	13.5952	16.1633	15.5573	14.1895	15.3897	17.5819	13.9147	14.4416	14.9616	13.014	16.766	13.5879
C15orf38-AP3S2	25.8918	22.0134	24.6206	16.9121	13.722	14.287	25.2351	18.3215	22.5326	23.8246	30.1399	24.5337
C15orf39	39.1311	45.6994	38.17	20.5866	17.39	22.0934	37.2748	37.6826	34.1598	34.162	37.5355	39.5951
C15orf40	50.0424	49.7213	52.7353	34.6993	35.4011	36.2199	50.6132	46.4859	53.3135	48.6493	44.6875	43.3274
C15orf41	6.80619	6.0617	5.76111	5.48	5.95378	4.15399	5.64251	6.66532	5.39018	6.34242	5.90155	6.50604
C15orf59	1.50398	1.92014	1.41689	1.89615	1.6463	2.03947	0.96528	1.17766	1.54842	1.52309	1.1193	1.05872
C15orf61	6.13666	8.2746	7.16501	5.0403	4.99998	5.41958	9.01815	7.08301	6.13058	6.28499	6.45492	7.10987
C15orf62	4.65154	5.50984	5.42222	6.4762	5.6248	5.39743	5.03446	5.05923	5.04469	4.25127	5.67189	5.82163
C15orf65	0.755876	1.68616	0.925332	0.553404	1.21871	0.888175	1.05077	1.25609	0.891435	1.44239	1.72623	1.47535
C16orf52	10.8148	8.54865	10.1388	9.90593	10.0525	10.1142	10.9502	12.2527	12.5286	13.3757	10.8539	10.1879
C16orf58	98.0566	106.357	99.9254	94.8541	87.7119	92.3448	105.432	96.4062	90.5983	93.8279	103.796	103.354
C16orf62	9.36478	9.52527	9.39081	9.05025	10.0644	9.04123	7.63495	8.16545	8.48195	7.04759	7.49312	8.58721
C16orf70	25.0325	24.6564	23.3307	22.8066	18.5978	23.3159	23.9932	22.0182	21.7074	20.8145	19.1641	20.0182
C16orf72	166.815	146.661	155.916	191.521	201.628	193.152	156.868	177.95	172.923	165.681	148.888	156.905
C16orf74	1.81714	3.24965	2.87807	1.88242	1.68744	2.40547	0.71895	2.15838	1.82333	1.85993	2.40964	2.19308
C16orf86	1.95182	2.13916	1.80646	2.13821	1.56302	1.90067	0.907027	1.1555	1.17496	1.11046	0.9768	1.17111
C16orf87	25.0254	23.5827	25.3939	25.4206	28.6602	27.1532	23.6001	25.5188	25.5186	27.2266	25.7663	23.8923
C16orf91	12.501	15.6511	14.1113	11.4001	9.93715	10.5101	11.1161	10.9559	10.0554	10.5143	12.6055	12.7199
C16orf95	2.20948	3.08192	2.55083	2.0195	1.6349	2.13453	3.4864	2.59435	2.53439	2.63584	2.37859	2.95075
C17orf100	7.43122	6.39877	5.76486	5.8364	7.16019	5.5881	7.52132	8.44369	6.7749	5.42331	6.85738	5.4131
C17orf107	6.36801	6.10433	6.20598	8.42854	9.16285	9.75836	7.48096	6.22523	5.80231	7.07651	6.89754	4.96775
C17orf49	15.9525	17.6711	16.3988	20.9652	19.0165	22.1682	14.9807	18.0003	12.9258	14.3088	15.1096	15.7097
C17orf51	8.13348	6.82539	6.59928	6.04968	5.03103	5.40161	4.65892	5.92071	6.11816	5.70884	5.35496	5.21412
C17orf53	13.6058	14.2675	15.0752	13.1157	13.2652	15.8391	12.1668	11.2699	10.6972	11.3114	9.07276	10.6464
C17orf58	17.9666	17.7686	16.9976	16.71	16.3119	17.8353	22.7852	21.2448	21.0708	23.5694	23.1958	23.7592
C17orf62	41.7554	47.7288	45.9325	50.5683	43.7142	51.5553	47.3551	44.7664	42.2987	44.1942	41.9347	40.57
C17orf75	27.3957	30.4924	27.775	37.3876	35.7106	37.6084	25.5408	26.5555	28.1057	26.9369	26.0548	24.0541
C17orf80	28.4687	27.6826	27.5272	32.5587	31.3275	33.5125	27.2013	28.1708	25.8099	28.9238	28.076	29.1498
C17orf97	1.81326	2.61572	1.9085	2.72492	2.95302	2.96199	2.54398	1.77946	1.96116	2.39134	2.67433	2.15321
C18orf21	13.7802	11.6734	8.98343	9.29719	9.51529	7.88255	10.2865	9.90912	10.8755	11.9946	9.9961	12.2813
C18orf25	54.6683	46.2612	45.3012	47.4279	52.5603	50.5561	47.0754	51.3577	53.331	54.93	46.6212	50.808
C18orf32	42.1625	42.0082	42.9778	45.376	47.8223	39.9402	46.9851	47.0344	51.3739	50.6368	47.4291	43.4516
C18orf54	27.5022	23.5198	23.3261	28.3343	31.0301	25.6831	30.8042	31.2626	32.2343	31.9604	27.8606	25.1606
C19orf12	22.8469	24.3507	21.8713	18.5861	16.804	17.6878	21.6311	21.1796	20.7814	19.2314	20.8375	20.746
C19orf24	32.6771	36.4038	34.7	29.9392	24.1866	29.8649	29.1451	27.7735	24.0687	25.6215	28.3825	31.1019
C19orf25	24.1716	28.2408	26.8106	26.0013	22.4808	29.0936	18.5577	21.1492	20.0014	18.9765	18.3682	18.6452
C19orf44	12.3636	11.6963	9.99651	10.9777	11.7452	13.5138	10.055	8.78909	11.8571	9.0533	10.4844	10.2457
C19orf47	12.4602	15.0333	14.7609	12.0627	10.5606	10.968	11.6955	11.1409	12.277	11.0182	10.3084	11.6042
C19orf48	289.628	375.207	355.41	288.107	265.718	290.084	282.555	265.722	227.47	258.177	258.56	263.681
C19orf53	42.4453	46.7802	43.0903	40.2336	32.7223	35.0001	41.2014	37.5722	31.842	38.4891	41.3092	40.4145
C19orf54	37.0551	39.3441	38.0674	33.8995	35.7409	37.7056	36.3884	36.0663	33.58	34.7106	38.4481	35.5981
C19orf57	14.9678	17.2425	14.9411	20.2446	15.841	17.4776	15.958	14.9309	15.4023	13.305	14.594	14.9736
C19orf66	3.20785	3.10465	2.67839	5.00321	4.52459	5.2614	2.37981	2.26751	1.56377	1.42192	2.26543	1.5343
C19orf70	37.1039	42.9272	41.0067	33.4647	27.7465	30.069	35.6409	34.2481	26.5805	31.3328	34.753	32.8957
C19orf71	4.41393	4.06974	3.17769	3.85458	3.08654	4.46507	3.51627	3.98248	3.985	2.51881	2.30985	2.32955
C19orf73	1.16289	0.648524	0.848221	0.830106	0.98434	1.18423	0.331823	0.907173	1.03406	1.06282	1.04377	0.717736
C19orf81	2.96536	3.19939	3.77844	4.42723	4.07798	3.40467	2.70989	2.33772	2.10379	1.85993	2.68971	3.03044
C1D	14.6873	11.9316	10.442	13.3895	12.3983	13.3584	13.8536	15.7656	14.654	19.3149	15.4646	17.5269
C1GALT1	22.0221	16.0709	17.3505	23.0414	24.3216	22.5854	25.5214	24.9845	28.6317	26.9299	24.6384	24.8008
C1GALT1C1	22.4437	22.7416	22.6321	21.6934	21.7024	19.9099	24.9973	25.7847	25.8159	28.9618	27.9409	29.3474
C1orf106	6.5472	5.95382	4.43155	6.01459	5.14409	5.21803	5.5434	6.02215	5.50298	5.58742	5.36337	4.20193
C1orf109	51.6275	49.1137	48.7564	45.4553	46.2519	43.5833	52.4865	52.9708	54.1228	53.3766	53.9284	58.0025
C1orf112	43.9652	35.3305	39.392	44.7716	42.2532	37.6409	40.4737	44.1416	46.4726	51.2792	38.5193	42.8812
C1orf115	21.2227	24.2548	22.9791	20.476	19.0306	22.3154	28.205	25.7149	32.056	28.6961	32.2766	33.0557
C1orf116	402.475	418.731	394.076	319.868	313.254	314.821	402.28	393.504	403.356	402.276	447.616	429.166
C1orf122	58.6965	73.3354	62.272	59.1575	46.003	52.9374	56.8121	53.1596	45.992	51.3118	53.6808	63.0868
C1orf123	15.4082	17.8128	17.7741	13.9458	14.4839	14.1368	15.4298	15.3522	14.7978	15.7145	17.6236	16.0294
C1orf127	0.353706	0.348004	0.180832	0.443006	0.563054	1.00417	2.82579	1.85649	1.39279	1.86152	1.5733	2.23398
C1orf131	53.4143	50.6706	57.6024	50.6637	54.7019	49.6592	50.0879	48.0987	52.6118	54.7831	51.8174	52.2712
C1orf159	26.9789	33.1612	30.189	27.7255	27.7959	29.0877	23.5041	24.7379	23.4982	23.344	20.7148	21.3726
C1orf174	32.2132	36.0865	35.8865	36.4873	35.1894	33.3496	30.3118	34.6505	31.5793	34.0267	35.3743	30.6615
C1orf198	62.6795	63.5986	55.5585	55.0084	52.7794	57.3243	49.6629	47.6615	45.3205	50.6356	50.3016	54.9068
C1orf21	45.7014	43.062	43.1436	34.0897	37.2643	34.8239	45.8469	44.7306	48.1018	47.8268	49.9002	46.8123
C1orf210	14.3182	19.6344	15.5311	21.8139	23.4697	23.8275	14.553	14.5571	16.0079	16.3603	16.5042	17.5507
C1orf216	28.9839	31.7705	31.3688	32.0196	31.0968	31.6835	29.4214	29.6815	25.6164	27.6021	25.1538	27.6356
C1orf220	3.96822	3.73187	4.35625	4.58288	6.5564	5.92645	4.4158	5.05464	6.47562	3.66838	3.59355	2.45098
C1orf226	20.8773	23.2375	18.7503	16.0802	15.1235	19.7934	26.4349	25.2508	24.3513	26.9309	26.8556	31.2892
C1orf228	1.51175	1.47036	2.15951	1.05147	1.35933	1.22124	2.48867	2.30315	1.78331	1.86148	1.36493	0.917589
C1orf35	111.305	130.021	131.446	102.615	86.944	100.351	95.7746	87.6731	89.6691	87.942	93.7723	92.5755
C1orf43	336.928	380.478	369.452	330.45	315.812	313.195	393.44	413.897	388.239	426.221	414.908	448.577
C1orf50	5.71437	7.51505	7.88275	6.31454	6.18196	6.88561	6.56163	7.74103	8.1504	7.3894	7.77689	6.63945
C1orf52	20.7594	17.9437	19.1659	20.2657	21.0544	19.0353	23.4596	20.7773	22.8712	22.0629	20.4376	20.9367
C1orf53	3.83752	3.19939	3.00733	2.65634	2.39054	2.5165	3.59475	2.82619	2.74562	3.18845	2.81015	3.38931
C1orf54	4.04537	3.3258	3.44052	5.40246	5.30393	5.34068	2.73268	3.74053	2.29409	2.72513	3.04798	1.9272
C1orf56	18.4721	21.9884	20.3228	19.2205	18.9582	20.8761	19.1068	19.3325	15.4118	18.5975	20.725	19.6988
C1orf74	16.5172	14.5411	12.833	16.0832	14.239	12.8955	16.4204	15.9887	14.749	15.941	15.0458	15.8036
C1QBP	226.124	246.779	232.705	195.684	189.655	180.806	221.271	219.151	220.987	228.808	242.355	247.465
C1QL1	1.86062	2.93998	2.429	5.53404	4.2186	5.66212	2.32276	1.70967	1.39064	1.55627	2.24812	2.95069
C1QL4	5.46556	7.26347	5.24355	5.09132	3.79674	4.36686	5.86221	4.22184	5.13466	5.88345	6.74435	6.93811
C1QTNF1	1.97691	3.37233	2.77671	3.26563	3.46863	3.70073	4.92204	3.73337	3.49442	3.75782	5.01942	5.14377
C1QTNF2	0.835963	1.36015	1.29055	0.91715	1.10895	1.3136	2.49509	1.45927	1.11344	1.4691	1.20435	1.09574
C1QTNF3	1.35726	2.24909	1.8783	1.977	2.30422	2.39665	0.836344	1.99436	1.55044	1.57204	1.88681	1.31585
C1QTNF3-AMACR	2.99005	0.6167	1.57786	3.05446	3.31728	2.8459	4.98377	1.91308	2.63804	0.105493	0	0
C1QTNF6	8.52221	7.29543	6.79974	8.37411	8.53088	8.50131	7.86803	9.13127	9.27097	7.44989	7.71118	6.0623
C1R	2.7351	3.57692	3.77673	3.90024	3.03751	2.9613	3.65019	3.7372	4.21129	4.14214	4.94794	5.53914
C1RL	1.4753	2.10231	1.55492	0.955641	0.878572	0.832502	2.39251	2.02949	2.87181	2.31724	3.42047	2.03642
C20orf194	2.16165	2.3373	2.71527	3.98451	3.71023	4.83775	2.8758	2.27664	2.6743	2.21095	2.12768	2.15321
C20orf204	3.48866	4.71261	5.35922	5.202	5.29669	4.73693	3.76066	3.10532	3.95797	2.73296	3.05102	2.23296
C20orf24	51.7077	59.8305	52.8958	55.1172	48.9358	48.7856	58.6205	51.5873	50.1669	54.9241	52.549	62.2436
C20orf27	55.9348	68.3112	64.6961	52.2413	38.7174	50.1079	49.8841	47.801	39.544	49.0034	45.0025	52.7934
C20orf96	21.5715	23.2604	22.6706	17.1002	15.7494	15.5431	16.4252	18.597	18.2566	18.827	20.5944	15.1123
C21orf2	23.1446	26.5471	22.5742	27.9771	27.2951	28.1053	23.584	21.0808	19.6597	17.2591	19.6401	20.6087
C21orf33	42.5154	43.8773	38.4692	21.4347	29.0904	27.8502	36.7302	29.2201	27.4703	18.233	35.4404	33.1391
C21orf58	44.2895	45.7134	51.8018	40.6187	40.5881	41.4268	49.3135	48.5954	48.485	46.0134	45.4045	37.6107
C21orf59	61.9269	65.2286	54.7302	59.0057	55.4264	54.6079	60.3014	58.6935	59.8975	54.8661	53.6499	61.5488
C21orf91	20.935	18.3317	20.2236	26.1821	27.1397	26.6469	23.383	23.5994	26.2786	24.015	24.8682	20.7806
C22orf23	7.55876	9.20905	8.71355	6.91755	6.51539	5.69912	6.41525	6.73402	9.09263	7.70542	6.14218	7.23355
C22orf34	14.6524	15.3208	14.8055	12.507	12.234	13.9147	15.0426	15.5267	13.7638	12.9436	12.0449	14.076
C22orf39	30.5655	31.6939	23.6871	19.3737	18.9879	20.1101	21.6576	24.4904	20.6072	26.5377	25.326	26.1792
C22orf46	61.4452	55.5453	60.2237	59.1056	60.1397	61.5061	51.3935	54.6959	59.5594	55.2974	60.679	52.5984
C2CD2	19.8286	21.6526	20.9044	19.4974	21.0647	22.3428	21.3876	21.0974	17.9836	20.1661	20.0515	20.7391
C2CD2L	57.8414	64.3929	54.586	61.7177	61.3361	68.8756	56.0964	57.7475	51.4074	52.473	56.6662	53.4852
C2CD3	55.9571	53.5101	52.4068	59.0136	62.5576	63.1653	55.4101	55.8942	60.9869	52.6948	56.028	53.0561
C2CD5	135.651	122.268	125.614	145.822	157.026	145.735	136.877	145.357	148.763	146.289	144.08	146.298
C2orf15	3.61796	3.94614	3.33399	4.98758	5.15552	5.79966	3.52268	3.41343	4.3384	3.09857	4.43767	2.77491
C2orf42	8.37278	8.89696	7.47977	5.42336	7.92159	6.14321	7.74254	7.59134	8.37949	8.12296	7.46696	7.81534
C2orf49	22.0709	19.5353	20.7837	23.8308	22.5397	22.8859	26.3754	26.0203	27.6699	27.3691	25.6663	25.9639
C2orf68	56.0103	60.3296	56.8368	65.1757	60.1367	64.2754	56.4486	51.1933	55.6202	55.4997	55.6148	50.7077
C2orf69	25.629	21.531	26.9977	31.5994	29.6606	26.8953	29.3016	34.502	33.6962	32.6762	31.743	31.2614
C2orf72	17.327	15.9105	15.1523	28.3343	26.6709	27.9775	24.6655	23.3074	22.1789	25.8492	25.3315	26.8353
C2orf74	24.0899	22.6386	25.3637	20.4056	21.0017	20.5168	24.231	24.759	29.0592	24.9573	33.2868	27.9015
C2orf76	5.00041	4.53967	3.93266	4.09519	4.07798	3.73774	4.42431	3.97761	4.02928	4.36514	4.3758	3.5488
C2orf92	9.01844	8.87845	11.7896	9.38504	12.1728	11.8171	9.16493	12.9184	11.2546	10.5086	8.10874	6.80385
C3orf14	5.29113	3.97762	4.27966	3.32042	1.92181	1.99839	2.37807	2.82619	2.35339	4.06148	2.77	2.6317
C3orf18	2.15134	1.97082	1.46525	0.908252	0.956327	1.47079	2.33075	2.42022	1.96116	1.59491	2.19244	2.08388
C3orf33	15.9352	15.3839	13.8926	14.2376	15.0796	12.1442	13.3916	13.1182	13.8021	12.7245	12.6794	14.9194
C3orf35	0.875648	0.750805	1.39669	1.05786	1.25316	0.781071	0.832746	1.40342	1.3282	0.727736	1.41205	0.600685
C3orf38	38.5497	33.2477	32.9264	40.3985	42.3735	36.0821	38.4362	35.5542	39.4371	38.1475	38.3384	37.0431
C3orf52	6.80288	6.44201	5.89899	8.49873	9.27724	8.40065	4.09249	4.25674	4.81375	3.98556	4.05464	3.50893
C3orf58	39.8288	31.4751	34.1602	31.6547	30.6552	30.605	39.3763	41.5206	43.395	43.3098	42.915	41.6685
C3orf62	16.1753	15.5051	18.5952	14.3848	15.824	17.1668	15.8345	18.8245	18.914	16.4259	14.1189	11.5149
C3orf67	4.6017	5.06799	5.14869	4.12594	4.29121	4.41448	5.13799	6.67662	5.94054	6.43179	6.07471	5.91271
C3orf70	18.331	16.6765	16.4972	16.4557	15.3175	16.7159	18.9034	20.808	21.9963	19.2767	20.1728	19.8123
C3orf80	13.1406	11.3276	10.5102	8.90981	8.76531	8.97022	16.0381	14.3752	14.9404	15.7904	14.6931	14.9707
C4A	1.24684	1.80599	0.819934	1.72393	0.979899	1.11086	2.07049	2.78745	2.6843	1.04903	1.63443	0.246564
C4orf19	5.09699	6.04453	6.86959	8.11269	9.10298	11.1698	6.75531	6.14728	6.57711	6.01594	6.60267	7.32248
C4orf3	70.6351	78.3171	74.481	88.7404	90.7453	89.1267	73.4227	72.8856	78.2968	77.5622	84.3029	85.5672
C4orf33	10.0306	8.8835	10.232	13.5097	12.6079	12.7123	11.194	9.6814	10.5406	11.4315	11.013	10.4607
C4orf36	9.11126	7.93831	9.75929	9.32926	12.2053	11.122	9.87323	8.10696	8.97827	8.30143	9.36661	7.37106
C4orf46	33.7818	27.6704	32.2941	35.1965	32.0145	30.3741	38.2703	37.8221	36.1084	42.0951	38.5392	37.6427
C4orf48	11.687	16.6022	15.6921	13.7798	10.5934	13.5447	12.7199	12.1422	7.80897	9.71718	6.54363	11.0053
C5	35.1604	30.556	33.4989	68.6104	76.4084	66.3503	31.9887	34.3139	36.8832	33.7402	34.7655	32.5373
C5AR1	2.09988	2.91357	4.50961	1.91815	2.20526	1.42355	1.92002	2.60161	1.77232	1.99251	1.73834	1.14676
C5AR2	2.97112	2.2252	3.55579	2.01732	2.43201	2.61876	2.27716	2.14421	2.34072	1.38742	1.59566	1.55974
C5orf15	74.7736	66.3224	71.0578	84.1174	83.0127	79.1586	76.2087	77.4586	77.4122	84.3041	83.903	84.2941
C5orf22	54.5942	50.3627	52.7862	50.8025	51.9913	51.2993	57.2206	57.3759	56.5091	60.5556	56.4402	59.3848
C5orf24	123.251	101.914	116.213	117.028	112.841	107.585	142.164	140.205	150.579	155.804	145.697	144.969
C5orf30	43.3756	40.9003	42.9894	53.4035	46.5452	43.5206	34.4543	32.7629	31.2359	31.3531	30.2292	31.5804
C5orf34	12.501	9.72787	14.2655	14.2136	16.7807	14.8011	11.3926	12.9091	13.3715	16.6215	12.1238	11.5236
C5orf42	24.9523	17.5097	19.9521	24.2591	32.7236	28.2466	20.2756	24.9205	28.103	23.0096	21.0059	14.9767
C5orf51	60.7026	50.412	53.3608	62.0919	66.8414	59.9888	61.4426	60.013	64.6112	61.4536	56.8051	59.6917
C5orf56	1.93984	2.01277	1.90975	1.66087	2.04321	2.15704	1.69584	2.5975	2.0449	2.14052	1.05019	1.38239
C5orf58	1.22103	1.68616	1.34944	1.16215	1.35933	0.740146	2.26746	3.10532	3.17351	3.18845	2.89044	4.42604
C5orf63	16.3323	12.1328	16.8178	14.896	16.4087	14.7055	15.0695	18.6317	17.4044	13.4116	14.6141	9.9756
C6orf106	119.644	120.962	112.867	118.411	116.797	115.045	118.521	111.904	114.431	122.252	116.853	131.241
C6orf120	37.7405	35.7405	35.3031	52.6559	47.1455	49.7889	37.3868	39.7289	41.013	40.1031	43.8892	45.896
C6orf132	79.3767	83.9062	78.9971	64.4506	62.313	68.7663	60.5801	60.0284	57.2657	52.4469	62.1018	60.5925
C6orf136	11.6636	9.14501	8.32143	4.83222	5.04722	7.56569	3.68305	4	8.20483	8.06266	9.21467	4.9335
C6orf141	1.64796	1.57671	1.59494	2.92417	1.9664	2.43835	1.30557	1.00768	1.07438	1.0474	1.31734	0.539332
C6orf163	1.96023	1.41137	1.71454	1.42175	1.90966	1.40806	1.1571	1.74375	2.05942	1.19478	0.810002	1.1812
C6orf203	14.7699	15.5524	17.4241	15.8938	15.4516	14.5059	14.8681	15.3425	14.1768	15.1458	16.6741	15.8275
C6orf226	4.18639	5.44761	5.66766	5.97676	5.81229	7.21642	4.3137	4.04739	3.17351	4.32718	4.33566	4.90453
C6orf47	25.5992	14.6684	20.9454	17.2084	16.5305	10.3404	19.1437	15.1416	0.00188893	15.4616	1.12761	7.69387
C6orf48	15.1258	16.8817	16.4862	17.5464	16.704	16.1172	14.4481	14.1939	14.5688	13.3702	15.974	15.3402
C6orf52	2.32577	2.93998	2.66033	1.71555	3.09364	1.96139	2.9311	2.30282	2.21076	3.87169	2.4087	2.55195
C6orf62	142.857	133.314	130.911	160.474	149.008	150.907	148.638	153.453	150.441	160.669	155.586	160.922
C6orf89	127.408	122.046	123.124	124.181	124.188	117.489	140.012	141.164	136.151	134.4	133.337	148.287
C7orf13	4.94226	4.71261	4.74233	3.76315	3.23426	4.77394	5.91751	5.93152	6.09741	4.28922	5.58015	6.49949
C7orf25	2.51515	3.59724	4.21568	3.62762	3.90368	3.45776	3.52742	2.86243	2.3096	2.55105	3.608	4.19622
C7orf26	26.3975	31.9506	28.0299	24.6265	22.218	23.0925	27.4307	24.1797	23.106	23.9513	23.6855	28.1113
C7orf31	1.62804	2.20498	1.31089	5.03598	4.73421	4.73693	1.27199	0.907173	0.962749	1.17669	0.963479	1.0766
C7orf43	23.4492	29.0491	23.1507	29.5079	30.6483	30.679	23.424	20.5221	19.2556	20.2813	17.3493	18.5319
C7orf49	49.1259	46.0143	41.8051	48.7899	43.5944	48.9957	48.0861	46.1405	46.1201	49.0962	43.507	50.88
C7orf50	101.47	117.742	113.594	95.816	84.6693	100.684	99.5825	91.736	89.9698	89.604	96.9942	108.857
C7orf55-LUC7L2	77.5456	87.9644	73.7038	69.7817	66.6362	67.7349	69.7282	64.5158	65.5247	67.3861	79.2286	83.1838
C8G	2.32577	3.19939	3.16155	1.71555	1.54682	1.14723	2.8758	2.4075	2.31773	2.04972	2.12768	1.91396
C8orf33	90.5119	95.4356	91.8527	80.699	80.4119	75.272	88.6044	88.4748	88.6032	93.198	84.6274	96.3121
C8orf37	9.27085	9.03822	7.76786	10.709	9.48147	9.12165	10.715	12.2325	12.7653	11.7595	10.4124	13.7726
C8orf44	3.16111	3.89629	3.30541	2.47529	3.71622	3.54702	3.77681	4.15059	4.06781	4.01356	2.89554	2.33463
C8orf58	2.67464	2.85351	2.58322	5.31268	3.60925	4.33416	1.96527	2.44239	1.9255	1.72936	2.44884	1.833
C8orf59	31.8088	30.0337	31.6308	32.3285	28.7521	28.7248	30.5457	26.0857	31.4397	33.8659	31.0066	32.4681
C8orf76	10.7649	15.0492	13.487	11.1879	11.6043	12.1508	11.2314	12.4186	12.4655	11.8874	11.0083	13.2194
C8orf82	103.962	126.376	105.6	98.3399	85.497	101.363	79.5245	69.8523	64.3972	65.0216	72.3011	79.3491
C9orf116	3.72123	5.62055	3.97122	6.0321	5.24981	5.92117	3.26293	3.14021	3.38745	2.99866	3.41232	3.62855
C9orf152	4.48894	6.8749	6.00935	9.51377	9.94402	7.52498	7.14008	8.5176	7.21795	6.8615	7.19212	8.98356
C9orf16	20.4086	27.8866	24.0586	27.5042	22.3117	27.5334	18.1397	17.4107	13.2645	16.7014	16.7405	18.7409
C9orf3	6.08166	6.56688	5.85981	6.66252	5.84732	5.85536	6.33003	5.98139	6.33441	5.10004	6.71253	5.62804
C9orf40	27.5604	31.3021	28.0684	28.8324	27.4209	27.0523	28.5368	27.3199	25.8516	29.4172	29.1452	28.6297
C9orf43	1.33732	1.55646	1.23378	0.719425	0.84372	1.33087	1.06217	1.29098	2.04006	1.65016	1.72623	1.87409
C9orf64	45.3256	48.7123	47.0745	47.9865	45.6495	46.2954	44.968	45.0899	46.116	50.6823	47.7133	50.6846
C9orf66	8.62763	9.86162	9.04434	11.599	11.2965	13.5864	6.65312	6.94099	6.76979	6.57417	6.13468	8.25378
C9orf72	16.513	13.2731	14.4583	28.1683	26.2491	24.9799	15.0426	15.3871	15.7962	17.2708	16.7003	17.5048
C9orf78	79.2743	77.8863	80.5634	67.983	69.7583	70.4471	78.274	79.1169	80.2124	79.0231	89.8051	85.9789
C9orf85	10.2383	9.46242	10.4041	10.7639	9.75788	8.59756	8.84186	9.40619	10.1065	10.0522	10.4262	10.5501
CA11	36.9798	40.9593	43.2213	51.1345	47.8963	53.0871	39.8398	36.2867	40.6345	40.4966	46.6355	42.107
CA12	18.2856	17.2612	17.8042	20.0375	21.66	22.073	37.0609	36.1149	35.3682	39.4483	42.1482	42.7909
CA13	4.51247	3.78596	4.63164	4.83612	5.35325	5.2425	3.75998	3.25835	3.34025	3.46129	3.45387	3.72711
CA14	2.34704	2.36981	3.8154	2.14228	2.97767	2.60772	2.44599	2.2006	2.16169	1.73024	2.46662	1.63513
CA5A	1.51998	1.78622	2.80461	2.34575	1.82185	3.22642	2.11732	2.20608	1.75205	1.54957	1.07044	1.7169
CA5B	8.06355	10.0377	9.60032	10.1348	11.181	10.3591	8.56952	9.12346	9.89385	8.44494	9.1911	8.29958
CA5BP1	8.69837	12.4785	10.9859	8.44574	9.9266	10.1362	7.26306	8.35902	8.74869	10.5865	9.01199	10.1307
CA8	3.0235	2.55086	2.19766	16.1594	19.1243	17.9485	5.91751	6.3851	6.41833	5.23817	4.97798	7.09761
CAAP1	30.3513	26.503	30.9986	31.1013	35.7175	33.4176	35.5051	32.5536	35.4434	36.7431	37.4954	36.8039
CAB39	68.087	64.2039	66.9758	71.7765	72.3724	66.5391	77.4807	75.4698	80.2657	82.0267	76.5163	84.3738
CAB39L	22.56	24.471	25.1382	12.8943	13.2183	12.8045	18.5821	16.0849	18.4705	16.2839	18.0652	17.425
CABIN1	98.6127	109.888	90.2872	90.5369	94.8247	98.8465	99.7129	101.394	97.9508	95.4258	95.2239	98.0152
CABLES1	8.20646	9.25228	8.97147	6.75153	7.15841	7.66051	9.45696	8.06265	8.2012	8.04704	9.49245	11.0031
CABLES2	35.1192	38.5656	35.8566	32.7615	31.4051	33.9727	39.2657	36.0078	35.7287	33.5926	37.0538	37.5615
CABP4	15.184	13.8305	15.3694	3.96927	3.90919	3.95421	11.7431	10.8547	10.394	12.3945	10.4343	10.7289
CABYR	3.71166	2.60038	2.96812	3.70991	4.14695	4.15425	4.42078	2.99605	3.26339	3.88496	3.99586	2.62316
CACFD1	7.89818	10.4517	8.28494	10.2444	9.91769	10.2628	6.55226	6.8053	6.45029	6.36304	6.13733	6.79119
CACFD1	7.89818	10.4517	8.28494	10.2444	9.91769	10.2628	6.55226	6.8053	6.45029	6.36304	6.13733	6.79119
CACNA1A	5.33959	3.70874	5.84845	4.67569	3.86628	3.7019	3.55435	5.03771	3.62019	2.88342	3.14003	1.89954
CACNA1D	10.1758	10.3841	12.0582	7.59132	9.67306	9.22705	10.4777	14.1353	13.4821	10.5361	10.2651	10.1587
CACNA1G	0.697731	0.216175	0.658543	2.54602	1.64057	2.11225	0.832069	1.12985	0.998407	1.51831	1.40507	0.797484
CACNA2D1	71.2849	50.9308	56.3296	83.9514	93.4654	81.8971	73.0011	78.6798	82.7964	74.9286	65.7575	63.5993
CACNA2D2	14.8704	17.6099	13.5262	17.7979	17.6919	19.2755	14.4582	14.0142	14.3998	13.4015	14.914	13.6915
CACNB1	6.04701	5.87995	6.59299	6.58551	5.01545	5.73613	5.86221	4.71032	3.77968	3.98556	5.13856	3.38931
CACNB2	10.0184	9.75931	9.38949	13.0419	14.5435	12.8713	10.1709	11.0029	10.6651	11.4682	9.44568	10.0388
CACNB3	66.1531	65.9426	65.5334	71.0761	68.5719	71.3116	47.8466	51.9527	48.5117	47.3606	48.6358	47.1277
CACNB4	0.868773	0.905634	1.28034	0.681839	1.38326	1.57699	0.980516	1.19154	1.97086	1.35276	1.42921	1.59154
CACNG4	3.19794	3.67497	4.58811	0.332042	0.374987	0.40708	2.04624	2.23304	1.80481	2.08768	2.32841	2.23296
CACNG8	1.93594	1.39915	1.74888	2.87272	1.53404	1.50151	1.0764	1.67435	1.55288	1.2996	1.39453	0.697433
CACTIN	50.8921	57.269	49.6042	46.0183	46.4672	52.419	48.9893	45.5942	39.8312	43.5346	43.5493	46.1553
CACTIN-AS1	2.3048	1.42347	1.01512	2.09323	2.34361	2.16885	0.355183	0.561832	0.805839	0.529914	0.708157	0.145412
CACUL1	69.5832	62.1413	65.5866	62.523	64.2911	62.4456	73.6541	76.3141	79.7464	73.4037	69.8161	75.3149
CACYBP	210.297	204.789	205.408	191.57	182.516	174.478	204.553	205.39	213.724	219.828	211.949	221.219
CAD	220.39	229.077	212.199	167.379	177.309	190.73	223.789	232.851	218.912	208.428	187.907	193.008
CADM1	3.53854	2.80051	5.02667	3.11658	3.37631	2.79323	4.27476	3.37748	3.6854	3.29413	3.46703	2.62559
CADM2	6.22144	5.49084	5.20499	31.212	38.6236	37.7474	5.86221	5.54771	6.0261	5.99732	6.74435	7.4166
CADM4	21.8623	24.298	20.8971	29.7731	27.5615	32.4184	19.1904	16.5036	16.6163	18.5613	19.6309	18.382
CADPS2	36.8635	35.885	32.3095	38.2956	39.4205	38.4136	37.5513	41.4857	41.8261	40.1593	40.4661	40.9109
CALCB	3.19794	2.66684	2.77532	1.27283	1.16609	1.33092	4.69373	4.739	4.84734	5.35075	3.89406	5.54251
CALCOCO1	44.0163	51.3926	48.9942	71.3894	73.0767	79.2374	55.4096	52.4929	52.8925	46.8035	59.0547	47.4591
CALCOCO2	66.4679	66.4894	68.1416	86.5462	100.055	89.2225	69.2543	70.0552	74.4884	73.1754	78.0968	73.1725
CALCRL	1.11826	1.02212	1.45085	1.11586	1.32182	1.57713	0.789437	0.595343	0.925006	0.401352	0.725134	1.07283
CALD1	218.099	211.462	237.733	222.247	230.148	222.303	261.643	265.802	267.109	269.538	281.296	275.969
CALHM2	19.5081	21.1998	19.0901	19.0732	16.6979	18.9847	17.505	16.3693	14.6034	14.0916	15.5804	17.0818
CALM1	241.706	241.856	230.254	263.918	246.929	242.286	205.896	201.426	197.681	237.121	204.779	227.481
CALM2	724.883	844.856	761.734	806.889	712.063	796.307	741.574	690.203	667.406	695.468	823.492	810.919
CALML4	32.184	28.8161	31.1683	14.7268	14.0464	11.823	35.8649	32.0008	32.4515	35.0114	38.2386	31.7905
CALR	1571.09	1692.3	1565.59	1521.02	1398.44	1448.55	1817.79	1704.59	1759.65	1806.13	2065	2004.99
CALU	192.574	170.346	170.223	202.048	197.665	178.856	215.409	217.512	227.316	244.182	245.968	246.064
CALY	1.62804	1.08087	0.886777	1.66021	1.49995	2.70153	1.3826	1.01185	0.67749	0.986901	0.762754	0.717736
CAMK1	24.0414	32.4157	27.6716	26.0189	21.374	25.1681	27.3343	25.0824	22.2862	25.9192	25.5473	25.139
CAMK1D	1.02314	1.29118	1.59129	0.49576	1.36815	1.2366	0.757289	0.876646	1.20562	0.548283	0.810383	0.896157
CAMK2B	31.5723	34.5447	35.1241	12.3409	12.3277	13.9517	33.4588	33.1467	33.0187	31.9984	32.4371	30.424
CAMK2D	102.16	93.6469	97.1984	181.351	186.415	176.784	88.6521	89.3566	94.706	90.3394	94.0195	89.5176
CAMK2G	38.6484	38.8823	39.8032	37.7803	36.8792	40.5177	35.5659	37.2064	33.2711	36.5746	36.8814	37.6649
CAMK2N1	6.43763	7.02206	8.85071	6.6318	6.0108	6.22073	6.6117	7.96766	6.4333	8.07451	8.59326	6.83088
CAMK2N2	21.128	25.0629	19.2324	21.4366	18.1164	21.8067	14.0934	14.4815	12.7602	13.801	16.4173	14.7464
CAMK4	14.1012	9.76528	10.8912	15.7563	17.5277	14.9952	13.1405	13.792	17.0181	14.4722	12.8978	14.8218
CAMKK1	26.4314	28.4787	27.3602	15.6278	14.9697	13.5648	26.0828	26.3134	24.7864	24.0442	22.6144	23.4802
CAMKK2	127.665	128.291	118.288	120.037	115.791	121.342	121.555	124.117	121.961	116.194	120.602	130.952
CAMKMT	4.76842	4.79951	4.85799	3.20974	2.81554	3.44179	5.08795	5.02434	5.09994	5.01042	6.10204	4.62665
CAMKV	8.02391	9.59816	8.55932	3.20974	2.67178	2.29445	8.46149	8.37391	8.77172	10.742	7.62754	6.1805
CAMLG	23.9751	26.8056	24.1708	25.2299	26.6412	25.7011	25.6044	26.3307	23.2787	26.4372	24.7796	27.9746
CAMSAP1	80.8206	76.4394	69.9397	72.8833	74.6223	73.7555	77.3701	76.6212	77.6261	80.3186	78.9652	84.7327
CAMSAP2	147.57	113.016	128.043	128.168	145.073	135.188	139.366	157.325	163.917	159.347	143.478	130.11
CAMSAP3	81.5183	95.8951	85.7089	69.4522	65.6227	69.1666	81.2414	77.3888	69.8172	72.765	78.082	81.3434
CAMTA1	35.8169	38.09	38.3242	30.7139	26.2022	25.9791	41.7544	44.8353	41.8974	40.463	44.9222	43.9812
CAMTA2	105.632	110.863	104.659	92.6088	90.4737	99.3722	102.296	101.727	95.4752	97.6348	101.492	93.6103
CAND1	313.343	270.144	277.456	373.64	385.711	363.267	304.307	319.293	333.124	333.481	281.803	311.063
CAND2	36.9697	34.7646	31.9695	38.3323	36.7336	37.299	37.5861	31.5827	32.6317	31.7303	35.158	37.5064
CANT1	85.1814	92.4363	83.1257	84.5601	74.0599	81.009	108.285	104.15	95.954	106.092	107.789	114.638
CANX	546.725	468.198	456.912	504.058	533.034	420.658	586.779	632.386	583.927	613.845	691.481	655.418
CAP1	149.81	147.368	144.845	164.166	154.14	146.16	144.257	140.32	142.93	148.169	153.553	153.966
CAP2	3.31422	4.23703	3.817	7.96902	6.37477	7.51248	3.15232	2.96576	2.85259	2.08768	2.4087	3.42918
CAPG	6.27958	6.3123	6.05322	5.81074	4.40609	5.14401	5.47508	5.5826	4.92072	5.61775	6.98522	6.57924
CAPN1	87.6148	99.2909	81.6325	113.329	99.0105	110.072	70.9961	65.9379	57.0687	65.0439	65.353	73.4693
CAPN10	27.0006	32.5538	27.058	26.5674	25.0677	26.2255	25.8878	25.4893	23.1233	23.8572	24.7494	24.9528
CAPN10-AS1	6.03931	7.25966	5.61818	4.99502	5.84032	5.28523	5.89243	5.62575	5.53432	5.483	5.77	4.62288
CAPN12	4.66414	4.15504	5.79119	4.1057	4.63553	4.25552	4.00802	3.74581	4.32152	3.45603	2.58519	1.6381
CAPN15	132.469	151.047	137.593	104.315	102.025	109.066	124.448	126.523	115.037	109.944	104.563	109.817
CAPN2	19.7437	19.8238	16.9724	19.6022	18.193	18.5182	20.2756	20.7106	21.862	22.2683	26.0983	22.1022
CAPN5	6.80575	6.44307	7.33963	2.55018	1.83098	1.59131	15.6553	16.442	13.9093	15.745	15.0142	16.7482
CAPN7	59.2746	47.9487	50.1154	67.49	71.5694	64.5647	54.9048	60.5811	66.2559	63.7561	57.9982	58.6159
CAPNS1	314.516	366.547	345.172	329.884	291.646	318.818	303.065	284.294	259.978	282.613	324.613	327.965
CAPRIN1	455.677	416.396	404.949	464.14	462.593	446.419	465.824	458.541	474.421	488.516	510.483	495.357
CAPRIN2	20.9008	16.302	19.41	32.4455	42.2081	36.8133	19.4153	21.7397	21.2587	16.913	17.5196	13.9299
CAPS	9.64619	8.47457	10.4173	13.3041	13.9132	13.8683	9.96991	8.9093	9.27584	7.13677	8.68411	7.50809
CAPS2	8.05557	5.68399	6.37713	7.46093	9.05645	7.84067	8.93262	7.77536	9.2607	7.18144	7.00238	6.8905
CAPZA1	190.196	187.725	180.076	205.847	197.121	181.128	182.937	183.466	187.932	204.277	201.57	190.779
CAPZA2	144.23	128.109	130.884	161.493	159.217	155.78	143.448	136.37	139.867	160.216	142.24	155.984
CAPZB	115.998	128.581	117.671	135.75	118.449	123.9	115.64	114.199	110.787	116.986	124.209	133.299
CARD10	42.4453	45.4399	35.7795	39.347	34.7331	39.0797	42.4734	42.0789	37.5472	41.7907	39.0611	43.3433
CARD14	14.0127	15.0759	15.2359	11.2054	10.2507	11.5968	15.0025	13.7781	10.2189	10.4459	12.444	11.503
CARD19	10.5634	13.3938	10.4846	10.3026	9.4069	12.1424	8.59316	8.09464	8.68093	7.8832	8.1509	7.44704
CARD8	29.7798	26.9543	30.0012	36.589	37.3593	37.746	33.3435	31.9311	34.8457	31.4299	31.1843	31.0225
CARD8-AS1	1.05177	0.926917	0.908801	2.24201	1.0985	1.32897	0.811063	0.906902	1.23065	1.16547	1.17041	1.0055
CARD9	1.5202	3.107	2.18826	1.80921	1.00408	1.71283	1.65925	2.01027	2.23983	1.77084	2.16548	1.45838
CARF	13.491	11.7165	13.0052	14.19	16.6998	15.6884	16.2822	16.3698	18.5595	15.4346	15.0343	12.1245
CARHSP1	52.0414	51.1843	51.8424	58.733	46.1015	53.371	47.7574	43.0317	40.1647	43.2458	42.985	45.8676
CARM1	92.3517	104.109	92.995	80.5028	69.2102	78.6223	89.4737	82.1616	77.3832	81.3512	88.1199	87.6688
CARMIL1	25.3509	26.5895	22.9406	32.4295	32.952	31.1231	24.9973	28.4713	27.8841	26.3807	25.9738	24.2036
CARMIL2	14.3616	15.4349	14.574	12.673	10.8746	13.6927	6.80237	5.93152	4.92072	4.70676	5.01812	4.66528
CARMIL3	2.79093	2.07528	1.92778	1.05147	1.03121	0.740146	0.940166	1.11652	1.06972	0.873028	0.682464	0.438616
CARNMT1	49.2289	40.6841	43.9918	45.3791	46.7327	42.2253	52.0409	46.545	51.4179	51.9641	48.5353	50.6004
CARNS1	4.32676	5.35817	4.34548	7.69232	8.43564	8.71768	3.73707	3.88183	3.98774	3.34613	4.33566	3.5488
CARS	31.8253	32.4603	23.9389	28.2819	24.3796	28.0064	30.61	29.9719	34.0662	18.8577	32.9337	29.973
CARS2	63.1529	67.025	62.9161	57.8167	57.3292	61.6364	61.8446	61.9298	60.324	62.2572	61.3067	64.153
CASC1	0.755876	1.03764	0.655444	2.05255	2.06243	1.7415	1.27199	0.55826	1.06972	0.495411	1.08391	0.837358
CASC10	5.37667	6.01898	6.05714	3.19594	3.24307	4.05665	4.97802	4.41259	3.87591	4.35582	4.52531	4.6287
CASC2	8.25176	7.00708	6.9313	7.11862	7.0551	6.69184	7.53757	6.56323	7.04645	7.45995	6.92253	7.62875
CASC3	135.524	133.958	133.076	138.721	141.609	140.772	136.041	130.419	129.592	132.458	138.451	132.667
CASC4	102.287	95.6734	95.6117	146.306	150.005	143.63	109.161	111.086	116.673	114.988	126.086	117.502
CASD1	12.6755	10.9384	13.4559	17.8196	21.6086	18.5777	14.2131	14.6892	15.9032	15.0313	12.2041	12.4408
CASK	66.3456	59.1929	57.6841	62.3874	67.0486	63.0273	68.6905	70.8747	73.2453	73.8691	72.2799	70.979
CASKIN1	41.4721	48.8847	39.2403	43.8036	37.6229	48.2491	42.2784	37.8431	30.9386	33.8053	36.0478	34.6937
CASKIN2	30.8165	38.7818	32.9264	40.5645	38.9986	43.5206	24.8314	26.0987	23.5695	24.5966	23.2841	24.722
CASP10	1.39544	1.9902	1.8794	0.986841	0.698383	1.1716	1.89278	1.58759	1.95003	1.61836	1.60742	1.3972
CASP16P	1.43547	0.86558	2.1082	0.808446	1.77744	1.39198	1.11582	1.99893	1.71624	1.24329	1.38651	1.03559
CASP2	69.8673	74.2794	71.1257	69.215	69.2502	76.1714	61.517	60.4374	61.1612	60.2385	58.1377	61.6279
CASP3	26.9789	26.1139	21.2826	31.5994	28.9677	30.642	21.4026	22.4002	23.1773	22.2812	22.6819	21.4523
CASP4	2.66098	2.61044	2.33715	2.09701	1.83002	1.43683	3.03046	2.28761	2.26746	2.75219	2.56196	2.14996
CASP6	26.4271	23.6947	24.3706	20.992	19.4446	19.8371	26.0274	23.7607	23.3948	23.0572	25.3074	26.7354
CASP7	22.56	23.001	22.2465	22.6896	22.6867	20.6871	20.4624	21.1441	19.7192	21.6739	20.1929	20.7346
CASP8	13.0965	12.9309	15.7191	16.0886	15.1557	18.3605	11.9835	9.25561	11.3444	10.1315	11.1985	10.5375
CASP8AP2	85.8495	71.7268	83.5217	94.3554	97.4942	90.0925	71.4491	77.438	83.1369	78.6284	74.1076	66.4304
CASP9	8.91419	8.10158	9.19758	10.3581	10.7251	11.6623	6.65347	7.09844	7.29228	8.24819	8.60706	8.25715
CAST	137.549	133.061	140.467	156.972	167.243	155.087	125.948	128.87	135.316	139.105	139.852	137.135
CASTOR1	4.28494	5.28078	3.10388	3.27094	3.32562	5.62511	4.59022	3.19354	3.16204	2.26668	3.45247	3.55703
CASTOR2	8.73066	8.44615	6.39435	12.4808	9.19971	12.4955	11.9008	9.59823	9.75839	9.49478	11.5984	11.873
CASZ1	55.6893	55.5275	49.9641	48.1329	47.1824	48.3425	84.0559	84.5594	81.1007	76.994	81.2894	77.6948
CAT	130.301	122.701	115.936	131.876	129.136	133.559	165.856	164.547	163.774	169.975	177.32	184.498
CATIP	1.27773	0.883191	1.49502	1.15206	0.710603	1.45396	1.27022	1.06142	1.07954	0.654733	0.884555	1.05856
CATSPER2	13.0599	9.97285	13.7117	9.09935	13.241	10.7786	12.5026	13.5606	12.2029	11.4691	7.50172	5.54919
CATSPER2P1	2.15185	2.94287	3.07192	2.48717	3.59617	2.71281	1.57079	1.71044	2.67825	3.33848	2.21992	2.60682
CATSPERB	0.324123	1.04641	2.39	2.16819	3.14308	2.18279	1.13821	1.78966	0.626842	0.712852	1.45964	0.579061
CATSPERG	2.82104	2.12535	3.032	3.74777	4.07269	3.85062	2.31099	2.3903	1.99115	1.74284	1.63965	1.28704
CAV2	2.07066	1.17986	1.38916	2.50761	0.975346	2.22528	1.79174	1.50635	1.08865	1.09083	1.41294	1.49772
CAVIN1	8.23991	8.65347	8.92383	6.9872	6.30908	7.41242	5.30897	5.31795	4.03566	4.59507	5.26581	6.47759
CBARP	21.9204	28.8377	22.5164	28.1129	26.0147	29.0877	27.0436	23.8307	21.7153	19.5862	20.9557	19.1795
CBFA2T2	29.996	33.8894	34.1721	34.5198	36.0455	36.1058	30.1967	30.9416	31.9791	27.6266	27.7862	26.1274
CBFB	52.6787	46.3911	47.5782	55.7278	53.3887	51.2921	54.8061	57.8846	56.3387	61.8332	58.2905	61.4461
CBL	52.66	49.6351	51.9193	59.7684	75.3589	69.9714	49.7699	56.6504	60.5911	50.9068	43.9599	47.7986
CBLB	26.9208	26.2877	27.1935	31.1567	32.9988	33.7179	25.7716	32.756	29.46	26.943	26.1344	25.4929
CBLC	9.88453	10.5926	8.67499	6.47483	6.3279	7.73452	10.6183	9.90912	7.84462	8.00908	7.86841	8.73245
CBLL1	88.4375	75.2825	81.1109	79.1854	80.2919	77.3822	87.4307	90.2986	96.059	95.1526	98.2749	90.3888
CBLN2	237.578	236.366	231.102	217.931	199.024	200.024	92.1915	96.7186	98.1648	85.2531	87.6365	85.4504
CBR1	55.9926	58.022	54.8483	38.4781	33.4588	37.9873	54.2472	52.6964	53.9264	57.0585	53.0219	58.6631
CBR3	6.85545	6.41261	8.7494	5.18821	4.86482	5.15904	6.55119	7.48647	6.17184	7.07903	6.99538	7.15789
CBR3-AS1	6.57318	5.51424	8.09762	5.6634	5.27629	5.59836	4.56334	4.22758	5.12271	4.21065	2.5034	3.01065
CBR4	124.158	107.801	112.822	108.785	119.307	114.052	172.731	173.064	188.592	185.202	184.921	183.361
CBS	165.411	187.093	176.527	153.791	150.942	159.414	161.011	159.231	157.752	164.697	178.193	167.692
CBSL	10.3595	1.84475	4.18652	16.0529	7.34904	9.70974	9.87789	11.1779	4.59647	4.40485	2.61952	4.36536
CBWD1	203.797	181.037	189.448	228.322	230.254	218.009	152.324	143.988	167.161	145.161	156.297	147.581
CBWD2	49.1409	50.1643	47.7022	52.5445	67.676	64.751	48.6295	49.2947	44.0839	54.5874	42.7894	44.3838
CBWD3	53.7687	47.0512	55.225	42.8983	50.4333	54.2833	40.6223	44.2808	45.1051	32.4855	50.9022	33.3595
CBWD5	66.6058	68.1404	59.204	79.3549	70.0615	69.5302	62.9189	66.0923	65.2752	74.4374	56.2105	65.6599
CBX1	144.042	150.804	150.135	155.595	151.615	144.543	148.823	143.78	153.966	165.799	168.681	169.897
CBX2	33.3167	37.5279	31.8854	34.0897	30.2802	34.5278	34.0672	31.4021	30.0948	34.1999	30.9518	37.2026
CBX3	464.483	460.576	479.779	452.77	428.961	409.819	485.787	489.285	490.242	531.805	491.031	521.598
CBX3P2	1.39546	0.994404	1.08679	1.05147	0.805244	1.0362	0.680593	0.976956	1.32862	1.59423	0.722609	1.35572
CBX4	82.8032	92.6883	84.7167	94.6198	89.7676	102.811	104.573	97.7475	91.7769	94.8897	115.805	110.731
CBX5	924.962	781.338	804.753	926.134	998.069	931.158	919.794	963.938	1033.38	948.14	855.008	906.566
CBX6	253.695	277.201	257.155	276.863	252.738	270.976	265.727	258.826	249.748	254.835	264.779	289.173
CBX7	62.9581	78.3567	63.9262	77.1087	79.6758	78.2989	62.3308	60.2164	60.3792	54.0936	61.0121	63.5252
CBX8	23.0833	25.0763	23.943	27.2828	22.6398	25.0169	30.6383	32.5536	28.9181	31.3151	31.9554	31.5405
CBY1	32.3975	34.4091	33.917	28.3132	28.6599	29.0983	30.0128	30.9941	30.9104	27.6361	32.1524	31.2193
CC2D1A	72.2092	75.0014	74.2626	82.5785	81.5294	91.8822	59.3452	57.0917	53.4359	53.654	54.2022	51.6007
CC2D1B	46.209	48.3191	41.5558	53.7534	50.614	54.2113	39.326	38.7195	38.351	38.3888	37.5082	38.5269
CC2D2A	17.1263	14.7769	16.5223	12.2294	13.3165	9.86053	18.5047	19.4839	19.7839	17.7244	21.3547	18.2464
CCAR1	127.056	116.525	147.616	143.922	148.927	142.532	128.809	134.052	142.924	137.993	142.891	128.655
CCAR2	177.005	197.799	172.286	161.597	149.327	167.217	161.318	149.114	151.831	154.584	158.407	170.112
CCBE1	1.63345	2.28008	2.09682	1.63796	2.37882	2.16578	1.89231	1.43433	1.51295	1.03855	1.51248	1.14622
CCDC102A	4.88412	7.22024	6.6701	9.79525	8.90593	9.28883	5.58569	3.97761	3.95797	4.28922	4.45609	4.90453
CCDC102B	3.62256	3.80232	3.58333	2.39532	2.39682	3.00335	4.96787	4.6521	5.22237	4.62263	5.34103	5.00692
CCDC103	0.923159	1.25668	0.549613	2.2964	1.02133	1.17652	1.02566	0.933236	0.891395	1.26885	0.903518	0.631042
CCDC106	20.1179	22.9612	21.1402	15.5507	15.0463	17.5044	19.3564	19.1204	16.4737	16.5116	20.5944	18.2225
CCDC107	6.49299	9.62893	6.67905	6.18072	4.79985	6.52938	5.12436	5.89128	3.9983	5.11634	6.17933	7.34565
CCDC110	4.43742	3.19939	4.66522	2.49032	2.20305	1.55431	5.14326	5.68728	5.09416	5.73162	6.70421	5.9723
CCDC112	32.9097	32.0803	39.211	25.678	28.5927	28.0515	27.2648	25.366	29.9165	31.8086	30.751	28.3506
CCDC113	35.9264	34.6799	33.7317	22.6496	22.1054	21.0476	25.0251	21.9975	24.1734	21.4638	24.5495	24.4075
CCDC114	0.656248	1.24354	0.864558	1.6397	1.18694	1.23843	1.37023	1.73513	1.33738	1.59526	1.18507	1.19194
CCDC115	20.5831	23.6495	21.4754	22.8556	24.6554	21.3532	20.4071	20.7254	19.9325	20.2315	19.6309	22.3694
CCDC117	46.1914	42.6933	41.636	50.0922	48.1978	48.1964	46.1242	44.4312	48.6222	45.4282	46.609	48.6907
CCDC12	24.1299	32.3401	26.6804	21.3614	15.8905	22.9865	22.2875	22.4028	20.6464	21.7118	25.0917	26.4765
CCDC120	18.1536	20.2062	20.8533	23.5915	20.7377	22.5157	18.5055	16.8133	15.8134	15.7489	15.677	14.5546
CCDC121	4.71063	4.94762	6.08209	7.803	7.32337	6.91453	6.91298	6.50396	6.42064	7.16672	7.97001	6.98679
CCDC122	7.57616	8.41813	9.8682	9.29992	11.0506	10.5143	8.3592	9.79668	9.11052	8.04805	8.85737	8.88968
CCDC124	109.258	127.547	118.31	89.7352	76.5535	99.224	98.1494	95.9124	87.3745	86.3708	109.126	108.768
CCDC125	30.0645	36.6375	27.3172	37.3384	38.1549	36.7278	39.4792	32.7026	37.2934	37.4437	35.8645	34.6569
CCDC126	16.513	12.7975	14.0342	11.5661	11.109	12.0644	20.1859	19.1553	20.1108	18.4854	20.9557	20.7745
CCDC127	30.6456	28.4893	28.3711	26.503	26.1845	27.5175	26.8412	26	28.878	28.5171	27.6616	27.9769
CCDC130	23.3159	24.298	24.9222	26.2154	24.9671	27.3093	21.9556	18.7456	21.8383	18.4985	19.9047	15.8301
CCDC134	7.84948	5.75025	6.01466	10.4593	9.04655	8.84474	6.91298	7.78075	7.20279	7.28789	7.34653	7.77547
CCDC136	9.65195	9.33875	10.8727	10.736	14.7182	11.7313	7.57663	5.96641	6.66793	6.94627	5.29914	6.14063
CCDC137	56.5891	59.7743	58.8372	48.5489	39.3353	51.5805	49.2727	47.7352	44.6771	47.0539	45.4813	48.2913
CCDC138	20.9319	17.5534	17.8126	18.3177	18.7493	18.3556	23.9562	21.6928	23.1755	22.8566	19.4703	20.934
CCDC14	173.444	131.088	161.278	206.53	235.82	214.531	170.557	187.541	211.698	192.867	179.568	138.981
CCDC142	20.1309	17.7807	19.7231	16.801	17.9346	19.9338	16.9983	16.1871	15.8141	15.3916	12.7523	13.4714
CCDC144A	14.7673	8.31096	13.1869	9.31984	18.4914	11.2591	11.4891	19.3177	22.4549	14.9238	11.8938	11.2496
CCDC144B	7.90294	5.89834	6.99765	7.47288	5.92731	7.92568	9.2727	9.77472	9.35918	6.77106	9.07864	6.39191
CCDC144NL	3.87533	4.59303	3.78848	2.80742	3.05086	2.59387	2.13201	3.11295	3.0341	2.37657	3.13457	2.60723
CCDC146	3.5468	4.92424	4.35677	6.97289	6.79663	5.66212	4.75613	5.68728	4.92072	3.79577	4.81557	4.53097
CCDC149	22.3958	24.8698	25.442	25.0152	28.8319	27.2487	25.1633	25.5732	28.6648	25.5079	28.2785	30.6633
CCDC15	10.1171	9.94404	10.757	12.4587	12.951	9.95496	10.6807	10.7208	11.9973	9.48944	10.4006	10.1684
CCDC150	10.0848	8.07417	10.2243	9.48702	11.9731	10.523	10.1011	10.6872	11.0226	9.36877	8.65825	7.16636
CCDC151	2.5002	1.94615	2.78415	2.77443	2.58203	2.82633	2.39022	2.13743	2.57495	2.01285	2.44884	1.87555
CCDC152	1.36758	0.856824	1.63656	2.56578	2.73371	2.94879	0.730714	1.39969	2.00997	1.82966	1.04532	1.06285
CCDC153	2.76219	3.08376	2.58287	2.21014	2.50313	3.30919	2.89888	2.28589	2.18538	2.04822	2.33804	1.92426
CCDC155	2.91468	3.50779	4.05433	2.65921	3.23944	3.30058	2.49327	2.09897	2.64557	2.66008	2.82936	2.23918
CCDC157	6.04884	6.1876	5.215	4.25143	4.6234	6.59443	4.63074	3.93248	3.51789	4.49564	3.06789	2.87114
CCDC159	16.3648	18.8128	17.339	13.1707	12.8374	17.752	15.2648	15.8232	14.6352	15.8237	13.8032	10.199
CCDC160	0.755876	1.08087	0.91677	0.719425	0.56248	0.555109	3.65005	3.27978	2.6743	3.40873	3.17145	3.50893
CCDC162P	1.49382	1.65208	1.37024	2.3378	1.93373	1.97351	2.09058	2.59571	2.44106	2.34445	1.94506	1.7307
CCDC163	8.87583	10.2432	10.1497	8.81229	8.25415	8.03378	10.551	12.1388	9.4328	9.76155	9.49616	9.93782
CCDC167	21.9785	27.7568	25.2153	21.4167	20.1087	20.502	24.3337	24.0401	21.4657	24.4068	25.0505	27.7524
CCDC170	0.2386	0.346493	0.481214	3.52983	3.20747	3.79922	1.46894	1.64838	1.90692	1.31922	1.16677	1.08611
CCDC171	8.03434	6.01565	7.59544	5.58938	5.90977	5.70385	16.5912	17.9066	17.3295	16.3682	14.9028	12.999
CCDC174	13.5476	14.2675	16.5018	16.7681	14.8588	15.099	14.2684	12.0375	16.4024	14.6137	16.1784	15.5111
CCDC177	1.10474	1.68616	1.27233	0.553404	0.890593	0.592117	1.16138	1.67478	1.88984	0.910986	1.12406	2.23296
CCDC18	30.743	27.7162	36.8214	30.8974	36.0611	31.4949	35.9668	37.6596	42.7036	37.3917	35.6127	31.8735
CCDC180	7.96847	9.80082	10.9508	5.34885	10.9572	9.44878	10.2252	11.6121	8.97549	9.99096	10.4564	7.07819
CCDC183	6.214	6.92897	5.36877	7.06385	8.14911	8.20862	5.04612	5.24976	3.77574	4.25314	7.15157	4.5877
CCDC183-AS1	7.0094	6.21154	5.36257	7.40607	5.60109	7.99917	4.17095	6.84028	6.74547	5.40353	5.86977	3.57993
CCDC186	100.272	82.4654	98.3106	105.514	118.871	104.858	86.6236	93.7115	103.329	89.0964	88.0124	82.1611
CCDC188	2.70373	2.58325	2.87832	2.43465	3.25251	3.59633	2.52308	2.37025	2.7304	2.14748	2.04784	1.23827
CCDC189	9.50481	9.18112	10.4877	12.41	11.3794	12.8786	5.86514	7.94961	7.3028	6.50825	6.80894	5.55701
CCDC191	15.5827	14.0514	19.0963	18.7898	22.4055	19.3548	14.1025	15.4917	15.3796	12.1844	14.5398	12.2414
CCDC22	19.1295	24.9033	20.6658	20.2546	20.6711	21.0201	22.8405	20.3765	19.4689	20.7249	18.828	19.4586
CCDC24	18.0349	19.3038	19.5852	29.5976	25.1205	28.2905	16.5597	15.2848	13.8765	13.0464	13.455	11.2695
CCDC25	66.0519	69.2192	72.253	55.7586	53.6259	47.7417	63.157	67.0956	69.6833	72.0058	69.2501	70.697
CCDC28A	10.466	10.5061	9.7931	11.0681	10.5465	11.1762	9.18044	9.42064	10.2337	10.4004	11.4012	11.0452
CCDC28B	22.0217	24.3539	23.3722	28.3577	24.4983	26.294	22.1004	17.0135	19.5301	20.6819	18.9484	20.8995
CCDC30	5.18094	5.57049	6.64406	7.42841	7.99443	8.25984	4.30704	5.69516	5.16459	5.36278	4.99724	3.94045
CCDC32	16.9989	15.9024	16.8634	15.3141	16.6277	12.7875	15.1939	16.761	17.5437	17.387	18.2493	18.5479
CCDC34	24.3043	27.4974	34.8156	29.3304	27.9365	28.2366	26.6565	26.3778	25.8159	28.9997	25.3315	25.998
CCDC39	3.34862	2.37792	3.11334	3.91975	4.05832	4.60595	3.5219	4.19288	4.11646	3.83678	2.68556	2.54605
CCDC40	7.64892	11.0332	10.2686	12.4906	15.9299	13.9344	8.97383	8.10179	8.19304	8.66415	10.3504	6.5325
CCDC43	44.4313	40.0093	46.6038	42.07	39.178	38.8147	47.1375	47.0728	47.5998	51.7667	53.8831	50.7391
CCDC47	161.06	155.963	148.742	157.31	149.393	145.223	174.596	177.716	193.08	188.564	195.33	198.081
CCDC50	66.2178	57.0982	63.9014	67.7165	73.4441	65.1942	73.1108	80.2496	81.6487	78.406	77.1102	75.9796
CCDC51	31.0527	33.4649	30.7287	26.6759	26.3428	27.0153	28.6483	26.3094	28.5972	29.23	30.0707	30.4639
CCDC57	45.2368	46.9152	46.5802	53.6321	58.6063	60.1069	39.6165	41.3448	42.0946	36.025	36.4733	29.1005
CCDC58	34.9273	31.3349	31.0061	29.238	26.9749	24.9665	28.0064	30.0938	33.5142	32.1577	33.3603	30.8561
CCDC59	49.5466	44.4852	53.794	44.7615	38.9135	39.4281	48.2223	45.7532	47.5028	48.2406	49.7611	50.1749
CCDC6	72.3315	66.3657	67.9734	79.7455	81.2784	76.6421	75.9322	75.749	73.4186	79.066	78.4031	74.6844
CCDC61	3.95381	5.23143	2.81455	4.09519	4.2186	4.77394	3.26293	3.07043	3.06654	2.12563	3.33203	3.11019
CCDC62	1.39387	1.09254	1.6788	0.768171	0.981634	0.784952	1.04141	1.51876	1.66871	1.37085	1.3528	0.534804
CCDC65	2.90721	4.3235	5.39777	4.81462	5.85917	4.29285	4.47961	4.36141	4.20757	3.6819	3.25174	2.03358
CCDC66	16.3679	16.3381	17.9713	17.507	22.2396	20.5531	16.9401	17.9362	18.3435	16.9885	18.1393	14.4069
CCDC7	1.98737	1.83654	2.17351	1.57287	3.30589	1.87531	2.23491	2.70195	2.48518	2.12558	2.13214	1.97163
CCDC71	19.0132	21.9201	20.3959	18.207	15.6088	18.2446	17.7525	18.1435	15.9745	17.8781	17.9849	19.2194
CCDC71L	10.5823	11.8464	10.5257	11.6215	13.1245	13.5447	10.9502	11.2001	11.5173	11.3494	11.6019	12.2414
CCDC74A	94.1465	98.9119	97.8638	91.1224	85.2751	93.5869	69.0315	63.5964	63.2829	62.3576	74.5707	68.3009
CCDC74B	22.542	28.3173	26.8577	26.6256	28.3285	30.0689	18.7763	21.9632	18.7231	16.6058	17.4119	13.8001
CCDC77	34.48	34.2126	34.0926	31.8918	35.9061	31.8819	40.3718	38.1711	39.758	41.1462	44.1193	40.7119
CCDC78	37.3868	36.9227	40.9845	32.9829	33.6082	38.7096	28.9792	33.7748	28.1337	27.5194	27.8205	21.2928
CCDC80	3.05201	4.17009	4.26072	8.86325	10.2296	10.4325	3.97511	2.65977	2.72808	1.33552	2.33314	2.87409
CCDC84	11.9518	12.6196	14.3442	12.6066	13.5222	12.9804	10.4001	11.4952	12.1925	11.2331	10.4252	9.00459
CCDC85A	1.55043	1.58645	1.03881	0.4545	0.374987	0.180509	1.42287	1.38619	1.7521	1.82644	1.57725	1.42859
CCDC85B	30.8746	37.0524	34.2758	26.9508	19.5931	24.6839	27.6519	24.5635	20.9665	20.6111	24.5687	27.1543
CCDC85C	70.2593	75.0899	69.9304	67.8617	66.4069	71.6132	70.8328	73.3217	69.2824	67.2783	68.896	73.2565
CCDC86	80.7023	83.0143	76.318	59.2798	51.1387	55.3917	70.8497	67.8787	65.0576	71.0994	77.1966	73.3946
CCDC88A	30.4885	25.5081	31.9423	36.4693	41.1182	35.6146	28.8438	36.1641	34.8301	34.4279	33.1181	30.249
CCDC88B	4.43257	4.05995	5.09381	7.6544	8.8814	8.38626	3.61329	3.36495	3.63156	3.15513	3.34856	2.66498
CCDC88C	29.7969	28.8379	27.6281	16.2707	15.6559	17.1355	27.7105	25.0555	25.9251	24.1416	24.3345	26.8765
CCDC9	14.9589	17.3704	17.9002	23.7787	22.0064	23.9642	17.2372	13.3447	13.999	13.0839	14.8549	15.4667
CCDC90B	46.1203	45.3045	44.3281	45.037	43.3892	41.2653	52.5466	50.1541	56.0129	54.0616	53.0591	54.4398
CCDC91	30.9753	28.9913	36.6117	36.7997	40.9409	33.5652	34.6315	33.2283	37.9681	36.6693	37.7662	36.8901
CCDC92	24.9323	26.5351	19.3768	24.2756	22.6241	24.5542	21.2054	20.7852	17.2939	17.1449	25.5771	24.8375
CCDC93	25.745	21.0122	22.4737	23.4643	26.7477	27.6013	22.9511	22.0474	25.1741	24.5966	22.7221	22.4093
CCDC94	20.4763	24.2752	22.7994	18.7119	18.1463	20.1096	20.6283	17.8677	17.8719	20.0193	22.5282	22.818
CCDC96	0.639587	1.42675	0.686597	2.10294	1.45307	2.21588	1.21668	0.373679	1.24801	1.27059	0.956458	0.677861
CCDC97	38.1427	46.9964	41.8713	38.1849	38.7174	41.9663	43.9113	37.4034	36.7628	37.6161	43.5974	43.104
CCDC9B	3.6976	4.72471	5.70052	4.2656	3.06564	3.45405	3.38142	4.26681	3.82208	3.27426	3.37794	2.92016
CCHCR1	33.2556	41.1668	37.197	28.4858	26.3831	35.7128	37.1497	35.7529	29.841	32.9509	28.8314	31.8331
CCKBR	11.4544	11.8031	10.2172	14.1118	13.4995	15.025	14.932	12.4911	11.0181	12.2983	12.2844	15.9896
CCL28	1.38373	0.885792	1.08564	0.676544	0.365586	0.418305	1.469	1.13982	1.09877	1.18117	0.819207	1.56
CCM2	52.1176	62.4106	56.8551	51.7753	48.7696	52.8476	49.1507	43.0105	42.4543	45.4163	44.8864	50.0319
CCNA2	125.834	124.353	117.3	132.888	118.593	117.2	143.551	135.622	137.721	159.199	159.561	155.909
CCNB1	165.072	171.21	164.092	180.244	156.838	157.984	186.54	185.482	183.885	210.931	201.447	213.566
CCNB1IP1	57.9464	63.1876	61.8709	66.363	62.2378	68.0721	55.5933	56.0612	57.4255	60.1465	61.8361	61.4117
CCNB2	80.2381	86.6412	83.3177	90.2602	85.5895	79.3796	95.1779	99.8234	96.9168	104.763	106.625	110.452
CCNB3	4.65154	3.89115	3.58566	2.3243	2.85927	2.40547	3.81597	3.5938	4.20757	4.09944	4.61667	3.34943
CCNC	59.1838	48.466	54.6195	64.7706	63.3477	61.2495	71.462	70.0744	71.3279	73.885	71.836	68.2671
CCND1	3041.35	3085.53	3018.53	3258.69	3168.33	3251.45	3035.52	2961.99	2950.36	2959.4	3066.26	3064.37
CCND3	32.2119	39.042	30.9608	35.2518	26.8115	29.6798	38.2749	33.9492	29.0967	37.6541	32.886	38.6817
CCNDBP1	30.2168	31.3749	31.8726	34.4019	35.1834	33.4778	32.6597	31.7588	32.3579	32.4101	32.2325	32.5513
CCNE1	10.9893	11.3708	10.41	10.5147	10.4996	9.76992	9.12514	9.28108	10.198	9.94493	8.99247	8.89195
CCNE2	51.1718	43.4722	43.7046	48.5686	48.3784	47.1449	48.5251	46.8956	48.5476	51.4291	46.9222	48.8924
CCNF	58.3387	66.2263	61.3484	60.4595	54.8219	56.7346	67.4168	69.0332	63.6653	69.3753	67.0011	71.879
CCNG1	133.267	122.398	128.313	158.772	161.479	145.069	173.931	172.677	183.849	189.143	181.054	193.151
CCNG2	30.7188	30.0483	26.4644	34.6984	40.8372	38.5246	38.9549	39.1929	41.0909	41.6018	45.2032	41.922
CCNH	38.6489	33.5342	36.4626	29.6478	31.501	27.553	33.8575	37.9093	40.3037	38.0128	35.3137	36.3382
CCNI	260.37	276.929	271.502	312.406	294.993	299.361	281.2	287.045	265.705	292.276	286.636	298.897
CCNJ	8.37278	8.64699	9.28818	6.58551	7.49973	7.14241	11.835	11.2001	9.8771	9.67922	10.6384	10.9255
CCNK	79.2649	77.4278	77.7758	79.2337	69.8781	77.3058	82.4455	74.0302	77.3358	78.5189	88.9343	80.1006
CCNL1	99.313	77.0015	91.9989	111.427	122.761	120.861	89.7582	100.463	103.804	101.423	98.1946	71.864
CCNL2	139.889	132.996	141.588	157.34	157.059	158.35	144.178	151.605	142.321	131.669	137.386	105.57
CCNO	6.86103	8.64699	8.7521	4.09519	4.03111	4.14482	6.41525	7.43184	5.91913	6.75648	6.14218	6.65899
CCNQ	16.5665	19.1949	19.4705	17.6994	14.9053	17.7203	15.3192	13.0104	13.7356	12.9463	12.8142	15.989
CCNT1	132.932	107.05	107.763	131.821	141.557	131.08	129.853	127.772	132.681	132.586	124.61	123.57
CCNT2	33.9741	30.0051	32.7336	34.6431	38.8334	37.3404	33.68	36.7041	37.9308	36.0978	34.8057	30.3841
CCNY	70.8828	69.6194	72.4366	72.0163	72.1869	69.8082	73.89	70.0218	68.8352	76.7377	74.6316	81.1449
CCNYL1	23.1183	22.6993	22.7668	27.6204	26.0112	24.6379	24.1359	23.3693	25.2124	26.312	22.7789	24.9235
CCP110	57.6738	49.1442	57.2631	77.6861	84.9104	77.332	56.4486	54.379	64.1468	58.9416	54.6996	51.8779
CCPG1	17.4792	14.2233	20.489	22.0823	20.8717	24.2095	23.3965	23.4367	26.446	25.4845	27.1182	23.8301
CCS	15.8152	19.625	16.8812	19.6458	18.89	20.465	16.2528	16.9022	16.0102	15.6765	16.9412	16.2687
CCSAP	69.5971	59.3572	68.4336	83.6188	76.9539	73.6732	68.462	66.5693	71.4191	69.7658	69.4883	65.3463
CCSER1	6.86103	6.70142	5.82188	10.736	9.70278	9.6219	8.18497	8.09478	9.44921	7.85725	7.62754	7.97484
CCSER2	22.466	19.3502	19.1966	23.4323	26.292	22.2019	23.3364	24.9752	22.6129	25.1035	21.6888	21.0761
CCT2	370.042	369.112	364.394	412.685	378.945	369.031	361.109	364.324	368.152	378.977	358.139	398.423
CCT3	608.21	647.736	605.428	554.312	521.088	518.12	610.08	589.353	586.15	613.044	597.507	660.584
CCT4	239.256	239.79	228.797	244.217	226.075	221.438	248.269	243.727	240.807	266.778	250.08	267.966
CCT5	335.089	332.08	329.248	308.257	302.378	286.731	333.092	316.932	334.76	355.093	354.426	371.626
CCT6A	344.171	331.364	327.31	320.342	304.482	280.907	349.478	336.592	353.483	369.198	349.824	365.798
CCT6B	1.72383	1.7045	2.54494	1.6839	2.52756	1.85539	2.34355	3.03608	3.14098	2.17913	2.59894	2.34036
CCT6P3	15.5386	14.2614	17.2276	16.298	20.587	21.1874	14.4146	16.3164	17.8445	14.6307	15.185	11.075
CCT7	343.575	368.751	343.568	310.072	285.318	288.435	339.123	322.919	329.303	345.605	357.13	371.946
CCT8	303.589	287.724	297.65	300.281	282.178	271.794	302.582	292.985	313.201	323.237	327.359	331.061
CCZ1	96.6713	101.649	95.7997	92.2919	90.5333	83.0881	102.481	96.2322	101.171	108.806	105.013	110.294
CCZ1B	37.5187	32.8382	41.4349	30.1039	30.1542	34.2784	33.7587	36.6168	33.4619	36.9836	40.8995	35.8295
CD101	1.51113	1.6664	1.71852	1.70583	1.24459	1.22775	1.55442	1.4969	1.86482	1.18781	1.84629	1.11479
CD109	22.3029	18.4767	21.1443	53.525	64.0827	57.7569	17.6254	19.4674	20.9107	18.4399	16.5874	14.6294
CD151	124.302	154.167	131.759	148.286	131.349	148.388	115.233	105.842	92.778	103.762	102.868	110.553
CD160	2.5705	2.0053	2.29482	2.42237	3.44595	2.5087	3.01431	3.02307	2.58723	2.26793	1.324	2.23282
CD164	251.711	213.548	214.613	281.799	280.843	266.935	274.518	284.388	290.545	307.858	290.255	311.503
CD19	1.80247	1.98881	2.46755	2.82236	3.56237	2.88657	1.27199	1.605	0.962749	1.25261	0.682464	0.917107
CD226	2.60028	2.05705	3.36585	2.29475	4.02103	2.76532	2.80308	2.5551	2.95724	2.02097	2.09144	1.24143
CD24	8.78913	10.8356	11.3457	10.3416	10.9372	10.7312	23.2056	23.018	22.2036	26.5528	26.5981	25.4487
CD27	1.98027	1.54801	1.00063	1.96319	1.26212	1.42222	2.14612	1.7989	2.19407	1.10964	1.20057	1.03397
CD27-AS1	55.2529	57.3198	57.5314	54.9137	53.3078	53.0049	53.1112	50.7303	50.0708	46.0864	45.7277	41.9168
CD276	157.672	174.255	157.47	113.267	102.513	112.223	130.357	128.574	118.84	131.381	148.359	152.211
CD2AP	166.928	142.528	156.735	227.298	236.498	211.825	204.824	196.308	219.546	217.475	215.944	221.548
CD2BP2	78.6111	87.6805	81.0051	83.1213	77.341	82.3782	78.3103	72.9577	76.2355	70.3357	76.0346	78.9509
CD302	15.039	13.3926	14.8931	13.3636	12.6508	12.1966	19.1933	17.6488	18.4071	20.4011	20.0425	20.0587
CD320	99.8853	127.218	107.43	95.1545	83.287	98.1485	85.5648	79.3768	72.8569	78.1134	82.331	89.048
CD36	1.79237	2.14401	2.9605	1.61378	1.03965	2.02175	1.57536	2.55114	1.78863	1.65527	2.75382	1.89673
CD37	4.46625	4.90298	5.45747	3.58823	4.79811	5.30346	4.44008	5.21293	4.88867	2.86781	3.62671	3.20007
CD3EAP	67.9049	74.1462	79.9812	48.5638	45.2495	46.4039	51.0605	55.1453	56.017	51.7914	58.3861	63.1413
CD4	6.91917	7.69582	8.55932	5.86608	4.12485	7.21642	9.18044	7.46673	5.59821	7.66746	8.10928	6.97798
CD44	41.5477	43.7331	44.0342	21.5783	22.1594	23.6764	62.1986	62.0025	62.0376	69.1144	70.5001	66.9751
CD46	444.253	377.995	378.499	457.623	470.186	434.397	462.148	474.239	484.092	501.397	458.371	461.855
CD47	91.3071	72.6284	95.0398	64.2861	65.6469	66.5748	90.2344	91.3345	88.1735	83.8182	87.556	78.1181
CD55	34.4214	31.7345	33.0069	30.7139	29.0615	28.0512	36.943	34.1686	36.4588	38.8241	37.6961	38.3191
CD58	2.55835	2.85351	2.81455	3.43111	3.46863	3.14562	1.93564	2.89598	2.21076	3.37824	1.72623	2.15321
CD59	26.8057	25.4531	27.7746	51.9726	46.9563	47.4264	27.8546	25.7532	25.5069	26.5531	24.7454	26.0981
CD6	6.22502	5.59422	5.13498	5.86664	5.91187	5.16549	6.63774	5.27372	6.775	6.37854	6.31407	7.13748
CD63	309.655	349.372	335.808	449.546	401.313	423.845	317.901	310.902	308.206	334.9	354.677	353.239
CD81	235.543	287.123	248.567	225.568	197.852	224.819	247.098	233.737	209.024	231.011	228.786	260.339
CD82	5.59676	6.80295	6.20932	9.55004	9.3447	9.8876	9.14112	7.99404	8.09206	8.30352	10.3134	9.06246
CD9	151.291	155.949	146.472	165.966	151.495	158.983	120.341	116.607	114.353	128.297	124.69	136.131
CD99	12.8499	14.6999	12.4149	22.9663	19.4993	19.0217	6.08342	4.98945	5.20598	5.61775	6.82464	7.21723
CD99L2	30.642	35.7985	31.8854	32.4848	29.0146	30.272	32.1315	30.495	30.4514	30.4042	32.4371	36.4051
CDADC1	8.77979	7.60935	6.13033	7.19425	9.28092	8.69671	8.01906	8.37391	9.30658	8.38866	7.38667	8.6527
CDAN1	32.8321	30.7098	28.5816	31.2513	30.85	34.2203	28.056	30.0989	28.5094	27.8034	26.8638	26.2818
CDC123	71.0823	82.5992	77.4432	69.5522	61.144	66.1867	82.7725	77.8984	80.6393	85.1652	86.0987	91.6253
CDC14A	9.94267	8.43082	9.13766	9.73991	11.9527	9.02978	7.79784	7.22249	9.69881	8.88211	7.38667	6.89824
CDC14B	15.0625	12.474	14.0128	17.1766	19.1357	17.8575	15.5625	15.2765	15.6354	16.665	13.2788	14.6151
CDC16	45.12	50.8443	46.0353	55.119	53.9512	50.589	47.3954	51.674	46.8538	47.561	46.9295	46.1344
CDC20	172.386	195.137	185.127	161.844	146.03	155	167.681	165.091	152.666	173.18	178.123	193.858
CDC23	62.9121	59.7075	61.4189	61.8152	56.3886	57.4723	61.7191	66.7819	67.9273	69.8422	67.0421	66.55
CDC25A	32.9678	36.7065	34.5457	33.0936	30.1396	30.7161	15.7616	15.5615	14.6908	15.1072	14.0106	13.3977
CDC25B	120.94	134.763	124.881	132.706	126.558	137.001	126.812	116.362	115.245	122.452	129.949	130.907
CDC25C	14.6608	19.1289	16.3475	16.4934	18.7516	18.173	20.354	18.8473	20.6473	20.649	21.9616	20.3375
CDC26	19.4934	21.2879	23.4263	19.2958	20.9477	20.8007	19.5893	20.7238	21.3069	23.5296	23.0329	21.5874
CDC27	107.462	83.23	98.4216	104.465	105.264	102.201	108.876	112.44	119.034	124.251	119.796	113.624
CDC34	31.6886	37.5279	38.2856	29.3304	27.2334	30.272	33.0164	29.1691	26.8857	27.7471	27.5394	32.0987
CDC37	207.808	227.891	227.477	189.652	172.541	199.58	197.656	180.946	175.791	175.934	211.684	189.562
CDC37L1	16.2804	16.0402	13.186	21.5274	18.5618	18.1706	19.7988	18.4575	19.2193	21.522	18.9886	18.8605
CDC40	60.9584	51.8963	52.6004	60.6934	60.4558	65.4091	56.8904	60.513	62.3342	65.4198	65.0067	61.2207
CDC42	192.326	192.766	180.443	201.829	189.322	185.291	195.482	191.272	191.842	210.689	211.716	211.574
CDC42BPA	192.865	176.572	189.616	184.616	224.664	200.987	177.083	196.577	204.673	174.606	165.317	173.134
CDC42BPB	65.6747	60.2378	60.4978	71.2006	68.4786	73.3326	63.1662	59.1355	58.5523	55.3921	56.2431	56.9649
CDC42BPG	94.0775	101.991	92.9188	76.5358	78.466	85.3388	97.9984	94.1018	86.6831	83.2793	87.3555	83.377
CDC42EP1	37.2705	40.2485	35.6253	19.8119	17.3431	19.0589	36.3899	34.9611	32.4839	31.9984	42.4734	38.997
CDC42EP2	17.0944	16.5158	15.7306	14.3885	12.937	15.025	12.554	14.759	11.1608	12.602	13.4887	11.7629
CDC42EP3	13.3152	14.0492	14.6165	14.9454	14.9552	13.1749	10.8967	13.9893	13.1934	13.6279	12.0445	13.5971
CDC42EP4	18.6643	20.1043	17.1572	15.8274	16.0307	16.6163	17.8078	16.2942	13.0506	17.7642	17.0215	18.9801
CDC42SE1	207.794	203.832	198.523	208.951	198.264	196.502	214.196	204.682	205.006	213.635	206.842	212.101
CDC42SE2	49.6891	47.4957	44.3234	62.6156	59.4541	59.169	50.6969	52.5012	52.971	56.4917	54.8553	57.9198
CDC45	79.1344	86.2537	79.3858	72.2746	61.4509	67.1682	82.4027	75.4	77.2339	85.0633	81.2534	84.0947
CDC5L	121.319	104.404	106.733	122.741	121.326	115.878	110.097	115.048	127.05	118.152	120.59	118.294
CDC6	120.522	117.499	116.338	109.369	106.196	100.921	108.929	109.294	113.313	119.596	114.732	123.287
CDC7	41.8057	32.2533	39.211	55.0637	54.5137	49.0347	37.2195	37.8919	38.3317	37.5782	39.864	35.7672
CDC73	172.663	139.905	150.608	157.317	166.077	152.38	177.206	181.265	196.736	185.354	175.103	182.267
CDCA2	36.1076	37.7009	36.5121	43.4976	46.0296	43.5206	44.5749	45.0446	47.6026	45.0179	46.8492	45.7756
CDCA3	82.8316	91.2909	93.5485	95.07	97.7994	96.7435	101.789	99.9255	96.9679	102.162	108.203	91.7294
CDCA4	31.3398	37.0091	30.536	34.3664	24.8251	29.3098	31.3573	27.6339	28.5259	28.734	26.6161	31.4209
CDCA5	85.3558	92.4796	83.9739	83.0106	71.9974	78.9366	83.2876	77.1097	76.0929	78.7623	80.6512	88.122
CDCA7	44.1897	37.7441	38.17	36.746	34.1238	36.4892	34.7308	32.1698	32.9118	33.0232	29.7474	31.1019
CDCA8	59.5398	64.031	56.6766	58.0521	51.1857	48.9606	63.71	60.5713	59.5478	63.731	68.688	63.5993
CDCP1	34.3497	31.6408	34.0732	18.7039	20.28	20.8266	39.7909	41.261	39.5079	39.1538	38.3409	40.8294
CDH1	359.222	348.108	326.69	376.805	393.168	395.726	392.647	390.012	397.522	396.348	420.018	425.262
CDH10	1.45444	1.91227	1.92778	1.82624	2.20305	1.96678	0.884862	0.907547	1.39074	1.3118	1.25357	1.2361
CDH12	2.01347	2.33074	2.07853	1.9399	1.37496	1.85608	1.24785	1.48118	1.43077	2.12227	1.49064	1.77538
CDH15	0.755876	0.924007	0.777597	1.45537	1.52004	2.0658	1.55935	1.20551	1.36129	1.10827	1.52843	1.16049
CDH17	10.6702	8.80552	8.82233	14.7378	15.7536	14.4267	13.7811	12.9227	12.3607	14.9291	15.4177	15.7344
CDH18	5.05979	4.7332	4.82642	5.05536	5.88968	3.70283	2.14544	2.76818	2.60664	2.4506	2.10325	2.72029
CDH2	6.27958	5.53599	6.05322	14.286	15.8901	15.9871	11.2267	13.9565	13.5855	14.8415	15.2599	16.7073
CDH23	8.88793	9.03611	7.28699	3.37576	3.35112	3.53247	14.5634	15.8755	13.4723	14.8415	15.9777	13.2968
CDH24	52.6206	59.6642	52.3584	53.2928	45.3734	52.9944	39.2657	39.8109	34.9799	40.6907	39.3421	38.1197
CDH3	67.6497	75.2846	68.3467	71.3177	69.6104	71.544	55.0505	58.5417	54.7369	55.8474	57.8322	57.2528
CDH6	55.1985	45.1651	46.0831	2.42491	3.46647	3.48316	16.4365	17.4002	18.5811	13.3193	12.6171	13.1566
CDH7	9.66645	9.68361	9.45371	11.6744	12.1051	10.6811	13.8354	14.2925	16.329	15.1401	13.317	13.4068
CDH8	1.63311	1.22772	1.69519	1.22753	1.23685	0.756447	1.89244	1.79041	1.58528	1.96825	2.08292	1.83439
CDHR1	2.38392	2.20498	1.77355	4.20587	4.9217	3.62671	0.608342	1.39565	1.10538	1.02486	1.40507	1.0766
CDHR2	1.62804	1.21058	1.81211	1.38351	1.26558	1.70234	1.10608	1.50032	1.4263	1.7081	0.923334	1.15635
CDHR3	3.63505	4.89176	4.56987	3.2567	3.39344	3.44915	4.92947	6.6711	5.43308	5.91456	6.62932	6.25164
CDHR5	2.93209	4.56744	1.40956	2.98838	2.24531	1.98001	2.4676	1.50713	2.50014	1.24369	0.839055	2.27859
CDIP1	48.5755	45.3027	43.3883	30.4538	38.9228	43.7572	36.1614	47.9108	48.0657	51.1745	50.6187	35.8396
CDIPT	71.0336	84.8642	69.3349	73.9988	61.7914	77.4511	69.1428	63.4405	55.446	62.43	64.0434	65.5825
CDK1	105.067	100.089	101.555	131.821	126.37	112.687	133.116	135.064	139.848	156.614	135.931	146.219
CDK10	155.253	162.068	167.636	123.882	131.992	140.341	149.318	149.332	135.437	134.261	132.747	114.994
CDK11A	18.6765	21.8128	25.1206	17.4167	19.7155	16.9775	19.3417	18.6732	18.6001	16.9267	19.6526	15.1617
CDK11B	93.7003	101.905	120.236	91.2471	89.5306	96.153	92.4416	88.3035	83.9792	86.1682	96.5402	90.6477
CDK12	91.4286	78.0322	81.266	91.4976	95.8041	91.9415	90.8035	95.7178	103.157	88.8995	84.7573	83.0277
CDK13	93.2506	86.311	91.6174	92.1455	101.213	98.0411	82.2394	87.8731	89.6504	82.9609	86.8493	88.3647
CDK14	61.4004	53.0493	60.3779	83.066	88.5176	82.2302	78.6974	83.9833	81.1562	82.8238	83.341	84.9719
CDK16	156.583	177.912	159.62	155.617	140.948	154.431	160.049	148.881	146.837	148.794	164.795	168.429
CDK17	30.4676	26.6327	25.2924	34.7538	36.5143	31.8263	28.9792	26.7616	31.3785	29.1136	27.6599	27.274
CDK18	28.4907	30.2225	28.532	32.2118	30.7501	37.8248	24.4443	23.7753	21.8936	22.2113	27.7803	24.2874
CDK19	169.544	148.79	152.377	198.898	207.774	203.281	162.67	164.314	165.444	156.9	161.478	157.954
CDK2	195.822	182.221	177.948	213.831	200.196	192.198	173.424	166.396	159.078	179.875	176.757	181.906
CDK20	13.6058	14.3972	12.492	13.7798	16.1244	16.2832	12.8305	12.7702	12.6584	11.691	12.9668	11.3641
CDK2AP1	120.203	139.673	125.14	86.5065	78.1173	84.9882	128.28	123.067	115.008	129.738	126.458	135.069
CDK2AP2	146.465	186.601	163.591	133.481	120.699	129.399	161.1	146.089	131.469	146.972	166.159	168.349
CDK4	220.46	262.612	225.852	217.008	182.27	206.44	197.156	190.578	186.719	196.118	185.829	218.047
CDK5	22.56	29.4422	24.2491	26.8401	23.2492	27.2739	26.6012	22.432	23.3556	23.9513	26.2088	24.6411
CDK5R1	12.2103	12.7975	12.839	8.6331	8.4372	8.32664	15.2639	12.9796	10.5902	11.9187	13.0873	12.4009
CDK5RAP1	32.6973	31.0618	32.3286	31.4105	28.5213	31.0672	29.09	30.6241	31.0475	32.9099	31.4773	30.5835
CDK5RAP2	121.299	116.661	123.455	122.634	136.964	128.872	135.716	143.543	150.652	140.292	148.657	138.882
CDK5RAP3	194.983	188.36	203.409	181.048	181.467	193.16	199.582	195.975	194.036	191.07	193.292	148.073
CDK6	47.4689	31.3889	37.4884	38.136	46.5177	39.9162	30.2441	34.8803	36.7165	33.9785	27.8418	30.0277
CDK7	25.9776	22.3156	22.8716	24.9805	24.4192	24.7822	23.876	23.7745	22.9752	25.4022	24.7261	25.1399
CDK8	20.1761	18.4181	18.8536	16.1041	17.5306	15.5061	16.4805	17.8294	16.9729	16.6634	17.8645	15.5111
CDK9	34.4214	38.8682	36.9362	40.5092	35.5769	37.5994	34.5096	33.3561	28.4902	32.1502	31.7547	36.1659
CDKAL1	21.5611	19.0014	18.4537	15.7095	17.4436	16.2902	16.918	19.0935	18.9102	19.2418	17.5402	19.9105
CDKL1	3.93737	3.6446	3.84224	2.58987	2.77988	1.99694	2.63456	4.13178	4.11643	3.83811	3.60581	2.94058
CDKL3	2.44666	3.41583	3.45811	2.5509	2.22087	2.05271	3.82593	3.98832	3.691	3.43535	3.61575	3.27553
CDKL5	6.21758	5.32497	6.05143	7.9576	8.66889	8.81711	5.32576	6.42099	5.75007	5.50363	5.72233	4.97751
CDKN1A	112.044	123.003	108.11	74.2115	65.3883	74.0516	173.378	164.547	161.92	165.42	163.39	175.765
CDKN1B	134.313	139.476	128.583	144.604	147.885	150.102	151.477	149.404	149.725	159.005	163.992	166.395
CDKN1C	2.72631	3.63616	4.60105	8.26177	6.16553	7.70623	3.46276	4.48653	3.84335	4.36147	4.06143	4.62551
CDKN2A	43.0181	53.2424	44.0955	40.4142	29.2842	39.1202	39.7856	37.8244	34.6253	37.8049	40.5475	42.5436
CDKN2AIP	19.6528	19.7584	16.9644	25.1799	26.2959	24.4988	18.0291	17.5852	20.1821	19.8899	17.1018	19.5384
CDKN2AIPNL	40.5639	46.0065	43.0247	38.9371	33.9628	35.6169	48.8504	41.4825	44.5028	45.8442	48.1927	48.6365
CDKN2B	2.87554	3.01568	3.12822	5.0878	5.36722	5.78146	3.06823	3.56721	3.72469	3.59796	2.95148	3.22057
CDKN2B-AS1	3.78842	2.38217	3.26767	3.89975	3.69118	2.68173	2.91323	2.92431	2.9533	2.71524	2.05481	2.80827
CDKN2C	63.3773	72.2456	67.4721	83.1213	72.5599	78.9366	76.264	64.2348	71.4931	75.6498	83.1804	85.2909
CDKN2D	15.9315	16.8184	19.0079	18.1517	17.2963	16.5793	16.1487	16.5036	15.6536	18.2197	17.7842	18.1428
CDKN3	31.2816	31.6912	26.719	32.8169	28.0771	29.2358	32.2975	32.5536	34.0885	37.9577	39.0209	38.0799
CDNF	3.23761	2.33469	2.51689	2.25158	1.60381	1.68768	2.98641	4.14591	4.05603	3.60599	5.1787	3.13939
CDON	6.59307	7.15476	7.50613	13.9837	16.4516	18.0122	8.00103	7.13644	6.75179	8.80674	8.06162	8.41196
CDPF1	8.25649	9.16581	6.6701	6.58551	6.04666	6.51328	8.84862	6.41999	6.69596	7.0981	5.78088	6.69887
CDR2	20.6537	20.2562	17.2324	20.6285	16.318	18.2982	26.1093	22.0099	22.3599	22.612	24.7926	24.4017
CDR2L	22.6181	26.503	23.5574	25.678	22.0305	25.461	21.1814	19.6089	16.7946	17.9161	20.7951	21.8511
CDS1	53.0276	44.9644	42.7966	53.2928	52.0294	49.3307	52.8152	53.4534	56.6952	56.6709	52.8308	57.06
CDS2	70.6568	65.4915	60.7514	68.2796	70.1845	65.4434	69.9993	70.9069	68.1505	67.6822	68.4097	75.5342
CDT1	120.859	143.111	124.992	121.949	103.809	119.039	96.0018	91.2096	77.1597	88.9403	96.3443	103.277
CDV3	238.74	233.382	236.345	284.005	282.927	275.371	197.656	203.556	211.841	200.643	210.319	211.254
CDYL	33.6681	37.1191	33.9234	34.405	36.1373	37.4708	32.779	34.7081	36.7387	36.4146	36.9123	37.6799
CDYL2	136.232	114.962	117.247	141.561	150.745	142.959	128.416	139.879	139.064	127.576	117.825	128.435
CEACAM19	1.54811	2.01207	1.86478	0.574288	0.692172	0.816418	1.63097	1.7326	1.49495	1.32374	1.79305	1.10222
CEBPA	7.50201	9.37623	6.54224	6.62836	7.99741	7.64976	8.22884	7.61888	6.73413	8.00689	7.8083	7.34424
CEBPA-AS1	2.67464	3.28586	4.164	2.93304	3.74987	3.40467	4.2584	3.24489	3.45877	2.20155	3.77363	3.22981
CEBPB	28.0838	34.5174	27.6795	25.369	21.9479	31.568	34.1387	31.9986	27.0549	29.236	34.4969	37.5045
CEBPB-AS1	2.61265	3.27869	3.44698	1.72191	2.93621	2.71128	2.35378	2.67639	2.3504	2.32007	2.36535	2.01985
CEBPD	19.4202	25.4383	24.0972	17.5628	15.1736	18.2446	16.5912	16.678	13.3612	14.9174	17.2569	16.0796
CEBPG	72.9711	69.9974	67.6264	61.6492	61.2634	60.5809	92.5787	92.3572	89.4287	97.8551	94.4611	94.781
CEBPZ	113.697	98.0366	111.765	108.471	111.637	106.62	108.791	115.125	118.816	123.837	119.006	121.532
CEBPZOS	116.498	112.679	121.824	108.419	99.5395	96.8748	123.146	122.641	133.359	131.338	135.293	133.241
CECR2	8.75915	9.31562	10.0691	7.26654	7.52995	6.72057	9.71273	11.1289	12.2653	9.14241	10.174	9.6557
CECR7	5.42236	5.83978	4.9864	5.97259	7.3973	6.26448	4.72634	4.90496	5.33519	4.3391	3.89587	4.51321
CEL	1.82065	1.94557	2.0303	1.19692	1.07809	0.867836	2.66143	2.94838	2.78128	2.94476	3.24124	2.95069
CELF1	202.048	205.897	205.412	204.412	214.649	218.521	212.131	213.504	194.59	207.2	210.864	203.055
CELF3	6.10515	6.87436	8.52077	3.59713	3.84361	4.51489	2.04624	2.96576	2.60299	3.03662	1.88681	1.87409
CELF5	5.52654	5.93394	5.60249	9.02231	9.95775	10.896	4.15335	4.40182	4.69647	3.46092	4.35557	3.19242
CELSR1	78.0878	81.5411	70.865	61.6492	64.3571	66.3171	60.6683	64.8978	61.7586	59.4039	56.484	64.6361
CELSR2	38.7822	39.0412	36.5892	45.3791	53.9981	44.8528	27.7072	29.6925	29.8096	29.1515	25.0906	28.829
[truncated: 11,994 more rows]
