# Supplementary material for: MEIS-mediated suppression of human prostate cancer growth and metastasis through HOXB13-dependent regulation of proteoglycans
Source: eLife. 2020 Jun 18;9:e53600. doi: 10.7554/eLife.53600 (PMC7371429; doi:10.7554/eLife.53600)
Supplement: Supplementary file 4. — TREAT and GLM methodologies in edgeR were used to determine significantly differentially expressed genes (fold-change >±1.5, FDR < 0.05) in LV-MEIS1 vs. control cells. [file elife-53600-supp4.xlsx]

## Sheet: Sheet1
SYMBOL	Control_1	Control_2	Control_3	LV-MEIS1_1	LV-MEIS1_2	LV-MEIS1_3	log2(FoldChange)	PValue	FDR	non-Log Fold Change
GPER1	72.0989	82.5788	72.3301	3.48645	3.79674	3.73774	-4.35882	3.1e-17	5.15e-13	-20.5181
MEIS1	4.24453	4.4532	4.04833	49.585	46.7796	45.815	3.47854	1.26e-16	1.05e-12	11.1467
SLITRK6	96.3451	89.4099	97.0057	631.766	662.742	597.335	2.74218	2.11e-16	1.17e-12	6.69079
STEAP1	165.847	161.414	156.226	29.4964	25.7965	25.9421	-2.57622	2.16e-15	7.17e-12	-5.96373
SLC45A3	150.536	177.869	150.444	23.5197	20.9524	23.0185	-2.8273	9.02e-15	2.5e-11	-7.09746
CDH6	55.1985	45.1651	46.0831	2.42491	3.46647	3.48316	-3.94537	2.11e-14	4.39e-11	-15.4055
GSTM3	22.8028	27.0388	26.6374	166.163	146.564	152.986	2.60095	1.97e-14	4.39e-11	6.06688
GABRA1	35.3517	29.8754	34.1987	2.71168	1.92181	2.81261	-3.73	2.71e-14	4.51e-11	-13.2691
PTPRE	81.595	75.3063	78.1497	17.6562	18.2005	19.8117	-2.07297	2.59e-14	4.51e-11	-4.20753
NMNAT2	44.3459	44.9619	41.1033	0.592211	0.910221	1.30336	-5.47837	3.13e-14	4.73e-11	-44.5813
TMTC1	6.10716	5.47162	5.94472	50.7782	49.4684	45.9984	3.0613	4.49e-14	6.22e-11	8.34724
NKX3-1	799.649	806.159	743.813	226.896	206.993	216.308	-1.85354	5.75e-14	7.35e-11	-3.61386
PRSS23	17.0823	15.2294	13.2321	100.243	97.7888	98.0096	2.70684	6.75e-14	8.01e-11	6.52889
ATP1A3	103.479	113.907	102.261	27.8916	25.1776	27.6507	-1.98549	1.55e-13	1.71e-10	-3.95997
IGFBP3	236.531	252.665	235.574	858.053	840.111	845.098	1.81097	2.06e-13	2.13e-10	3.50879
CNTN1	0.705453	0.699041	0.372262	14.8866	14.345	15.3795	4.66981	3.94e-13	3.82e-10	25.4539
GABRB2	57.0395	46.6938	48.8113	9.79525	8.24971	7.6235	-2.57924	4.37e-13	3.82e-10	-5.97626
ANKRD24	24.7695	27.1083	28.2997	3.76315	4.26547	3.95978	-2.73988	4.64e-13	3.86e-10	-6.68014
SYT7	46.6899	50.1093	49.4282	10.2933	10.2653	10.8061	-2.21948	5.07e-13	4.01e-10	-4.65727
HLX	10.1182	12.7268	12.7655	1.439	1.26086	1.3273	-3.14827	5.58e-13	4.03e-10	-8.86593
ZNF385B	40.4684	39.56	38.5555	140.952	139.12	135.632	1.81018	5.36e-13	4.03e-10	3.50686
CLRN3	25.4672	24.4278	24.8297	5.42336	6.3279	5.51409	-2.1122	6.91e-13	4.78e-10	-4.3235
PLPP1	173.228	186.29	170.285	52.0223	45.7647	46.7827	-1.8755	7.49e-13	4.98e-10	-3.66928
GNG4	16.8218	19.1284	18.1102	2.32726	1.92172	2.03153	-3.10859	8.29e-13	5.1e-10	-8.6254
GNG4	16.8218	19.1284	18.1102	2.32726	1.92172	2.03153	-3.10859	8.29e-13	5.1e-10	-8.6254
CHPT1	563.344	561.235	539.509	179.433	172.798	165.069	-1.68595	1.08e-12	6.38e-10	-3.21751
SCNN1A	66.71	73.3962	73.6171	19.4833	20.9965	21.3923	-1.78672	1.11e-12	6.38e-10	-3.45028
IL1R1	19.4304	16.2826	19.0593	3.1029	2.44323	2.98155	-2.67946	2.03e-12	1.09e-09	-6.40616
MCF2L	1.58209	1.98915	1.35409	18.9725	18.4302	20.9329	3.5642	2.12e-12	1.1e-09	11.8285
PTCH1	116.484	113.546	110.663	32.3015	37.4713	36.9889	-1.67054	2.66e-12	1.34e-09	-3.18333
LPL	46.341	45.3967	41.7171	6.86221	5.01545	7.95657	-2.73829	3.02e-12	1.48e-09	-6.67277
CADM2	6.22144	5.49084	5.20499	31.212	38.6236	37.7474	2.67434	3.42e-12	1.58e-09	6.38346
NRP1	31.4001	27.9459	26.0369	99.1754	106.65	102.291	1.85549	3.32e-12	1.58e-09	3.61874
SLC6A17	9.60998	8.86534	9.43477	1.21114	1.37179	1.29526	-2.83921	4.01e-12	1.8e-09	-7.15629
NOTUM	28.6651	37.8738	30.5745	4.86996	5.01545	5.55109	-2.64818	5.61e-12	2.45e-09	-6.26875
DCN	2.461	2.99288	1.82515	28.2728	28.1538	26.4786	3.51211	6.51e-12	2.72e-09	11.4091
ARNT2	8.02622	10.6975	8.23231	0.689684	0.390016	0.564777	-4.03485	7.7e-12	3.06e-09	-16.3912
SCG3	10.6404	9.63502	9.17621	0.492	0.459909	0.451888	-4.37931	7.74e-12	3.06e-09	-20.8115
CPLX2	8.08206	8.43082	9.63888	0.0553404	0	0	-8.7402	9.69e-12	3.63e-09	-427.625
MFAP2	14.8849	19.6719	16.0391	1.93691	1.31245	1.48029	-3.43126	9.84e-12	3.63e-09	-10.7873
PHYHD1	16.2302	18.0043	16.8744	0.645128	1.05769	0.520772	-4.5277	9.52e-12	3.63e-09	-23.0661
PCDHB5	3.30886	3.26653	2.54158	17.5005	17.2034	18.1856	2.54175	1.01e-11	3.65e-09	5.82295
NDRG1	50.2367	56.3784	54.5175	13.0603	11.859	13.5817	-2.06426	1.04e-11	3.69e-09	-4.18219
SLC7A5	211.024	236.17	198.866	57.4594	48.1835	52.6186	-2.03009	1.21e-11	4.09e-09	-4.08429
SRRM4	26.7733	27.4178	29.3274	1.45351	2.02008	2.84122	-3.69186	1.21e-11	4.09e-09	-12.9229
VGF	90.7632	107.266	94.8466	13.171	9.37467	12.5455	-3.06192	1.23e-11	4.09e-09	-8.35083
AP3B2	7.65037	9.17682	8.1304	0.557289	0.472734	0.603662	-3.91498	1.34e-11	4.35e-09	-15.0844
PHF21B	8.31463	11.414	10.3329	0.110681	0.187493	0.185036	-5.8829	1.42e-11	4.54e-09	-59.0103
SMOC1	9.07334	7.91753	7.37189	36.3586	34.8333	35.6399	2.13622	1.98e-11	6.21e-09	4.39609
SEZ6	12.4652	15.7375	11.2197	0.166021	0.14062	0.333066	-5.84615	2.04e-11	6.28e-09	-57.5264
SEMA4A	56.1092	63.6851	59.1442	18.9264	19.7337	19.0217	-1.63386	2.34e-11	7.07e-09	-3.10343
AGAP2	21.8151	26.6639	23.9223	3.14421	3.74073	2.35727	-2.97916	2.53e-11	7.49e-09	-7.88528
COL6A2	9.53566	12.4949	12.5305	57.2773	55.4043	61.7282	2.32793	2.69e-11	7.52e-09	5.02085
KCNJ8	20.1761	21.704	18.4295	63.6968	59.2479	62.3573	1.62007	2.66e-11	7.52e-09	3.0739
RHOBTB3	11.6352	12.0359	11.1682	37.1437	36.3969	36.4744	1.65883	2.71e-11	7.52e-09	3.15761
SPATA13	310.272	267.486	280.208	104.46	107.754	107.785	-1.42206	2.63e-11	7.52e-09	-2.67968
ADGRG1	11.557	12.5216	10.2923	1.96748	1.50126	2.01184	-2.64114	3.04e-11	8.29e-09	-6.23822
TOX3	27.6365	26.9364	27.3766	71.517	70.6425	74.2773	1.40161	3.11e-11	8.33e-09	2.64196
LOC200772	16.4703	13.4196	17.4029	0.442723	0.747534	0.758622	-4.55896	3.41e-11	9e-09	-23.5714
ARSJ	4.13566	2.9908	3.75195	28.0576	30.6651	30.9531	3.04759	4.02e-11	1.04e-08	8.26827
MAFB	32.9097	38.3926	30.0733	5.81074	5.15607	7.51248	-2.44286	4.73e-11	1.21e-08	-5.43718
ACADL	21.1046	19.9309	24.0325	5.42336	5.81229	5.73569	-1.93732	4.86e-11	1.22e-08	-3.82993
MOB3B	18.753	15.655	17.3963	56.6518	57.71	56.3378	1.72258	4.98e-11	1.23e-08	3.30026
DPYSL3	71.9245	62.0854	64.7733	24.0177	23.9991	22.7595	-1.4894	6.21e-11	1.52e-08	-2.80772
SYP	17.0267	17.0192	14.4092	1.2439	1.8452	2.13701	-3.18814	6.37e-11	1.53e-08	-9.11435
MCCC2	326.104	329.797	330.244	751.487	743.521	733.844	1.17636	8.47e-11	1.98e-08	2.26006
NLRP6	8.72164	9.90081	9.21477	1.16215	0.7031	0.666131	-3.48445	8.38e-11	1.98e-08	-11.1924
PSD	24.8058	24.3205	24.3374	5.98095	5.70037	6.33967	-2.02428	1.08e-10	2.49e-08	-4.06789
CA8	3.0235	2.55086	2.19766	16.1594	19.1243	17.9485	2.78574	1.45e-10	3.29e-08	6.89591
UNC13A	65.6062	69.2531	62.8474	20.5252	22.5293	24.139	-1.55298	1.46e-10	3.29e-08	-2.93424
HBA2	13.2664	14.0065	17.4904	0	0.0468733	0	-9.51961	1.67e-10	3.7e-08	-733.984
GNE	11.3223	12.7625	10.6724	2.22657	1.71385	1.81989	-2.59851	1.74e-10	3.78e-08	-6.05661
STEAP2	524.06	410.671	472.125	122.719	124.098	110.299	-1.97836	1.75e-10	3.78e-08	-3.94046
SCRN1	29.421	28.3189	26.9117	72.2192	72.8412	69.3887	1.34203	1.79e-10	3.81e-08	2.53508
ABRACL	108.672	109.903	106.182	256.78	248.101	239.104	1.19572	2.11e-10	4.33e-08	2.29059
EPHA4	14.3822	11.5655	12.5526	1.55023	0.98434	1.22202	-3.36045	2.1e-10	4.33e-08	-10.2706
SPRY4	4.07071	4.49644	4.85845	21.4721	19.7337	23.0684	2.25379	2.15e-10	4.35e-08	4.76935
ALOX15	7.43656	10.208	9.6938	1.03643	0.560759	0.585578	-3.67249	2.26e-10	4.52e-08	-12.7506
LOC100128317	15.2338	14.5269	17.5042	56.6132	66.232	53.5495	1.89657	2.37e-10	4.63e-08	3.72327
PART1	12.0066	13.1789	12.2583	43.7044	47.6102	42.8509	1.83964	2.37e-10	4.63e-08	3.57921
KLK2	281.904	285.081	294.596	111.709	109.329	105.524	-1.40025	2.52e-10	4.86e-08	-2.63948
INHBB	28.8396	35.0203	28.454	9.85059	9.60903	10.066	-1.64406	2.73e-10	5.22e-08	-3.12544
PLA2G4F	19.3039	18.108	16.9373	5.63565	5.12909	5.47708	-1.7408	2.9e-10	5.42e-08	-3.3422
PRR15	6.22144	7.177	6.59299	27.3935	28.6865	28.8287	2.08385	2.89e-10	5.42e-08	4.23937
CLSTN3	11.333	11.6302	10.7955	34.9751	32.3895	33.1276	1.57357	2.98e-10	5.48e-08	2.97641
ZMIZ1	66.4589	69.3561	62.0358	25.0139	23.6242	24.8319	-1.42857	3e-10	5.48e-08	-2.69181
PDZRN3	4.30268	5.70701	4.81944	0.664085	0.609353	0.740146	-2.8664	3.35e-10	6.06e-08	-7.29245
PGGHG	114.835	118.291	120.679	34.9751	34.78	39.7088	-1.68997	3.58e-10	6.4e-08	-3.22651
CHGB	6.29049	6.93044	7.57563	0.397279	0.363529	0.26782	-4.34411	4.2e-10	7.43e-08	-20.3098
ANK1	6.80288	5.66378	5.87283	1.27283	0.84372	0.925182	-2.59901	4.46e-10	7.65e-08	-6.05872
CABP4	15.184	13.8305	15.3694	3.96927	3.90919	3.95421	-1.9057	4.37e-10	7.65e-08	-3.74691
SCD	729.188	748.224	713.694	1638.51	1655.23	1614.29	1.16348	4.46e-10	7.65e-08	2.23997
KISS1R	4.41897	5.44761	5.08933	0.221362	0.14062	0.185036	-4.74673	5.06e-10	8.58e-08	-26.8477
ALB	28.0837	30.0915	25.7551	9.68457	9.09343	9.84394	-1.55016	5.22e-10	8.77e-08	-2.9285
CHRNA2	21.0381	23.6976	21.5544	6.36471	5.48652	4.96007	-1.98812	5.59e-10	9.25e-08	-3.96721
GRIP2	11.3427	11.1261	10.8771	2.04977	2.20417	2.84965	-2.21546	5.63e-10	9.25e-08	-4.64428
SAT1	8.31463	7.60935	8.4051	24.4051	25.3585	22.9445	1.5787	5.72e-10	9.32e-08	2.987
ELOVL2	16.106	14.7864	16.5789	2.37964	3.98423	2.77555	-2.37152	6.12e-10	9.87e-08	-5.17486
GRID2	1.5699	1.29705	1.80789	12.2302	14.5776	13.7667	3.11104	6.56e-10	1.05e-07	8.64003
LOC101927751	8.26447	10.4532	9.14218	2.01439	2.23505	1.91041	-2.17907	6.93e-10	1.1e-07	-4.52862
VWA2	11.2801	12.2355	9.87021	2.54627	2.48429	2.48056	-2.14978	7.77e-10	1.22e-07	-4.43759
BICC1	13.3466	10.4597	11.205	2.61026	3.36612	2.7814	-1.99156	9.01e-10	1.37e-07	-3.97668
SLC2A12	20.835	16.0935	18.7786	54.1647	59.906	64.267	1.68437	8.83e-10	1.37e-07	3.21399
SLFN13	20.2911	15.8526	21.5107	62.8258	70.4702	64.4472	1.77841	8.89e-10	1.37e-07	3.43049
PPP1R3B	10.7142	13.9092	11.7045	41.0888	42.5358	40.8349	1.77229	1.04e-09	1.58e-07	3.41596
CAMK2B	31.5723	34.5447	35.1241	12.3409	12.3277	13.9517	-1.38812	1.12e-09	1.68e-07	-2.61737
KCNN2	10.9294	11.6979	8.74935	2.32538	2.04822	2.35869	-2.21494	1.14e-09	1.68e-07	-4.64263
SHANK2	23.102	20.6703	19.3665	4.43221	4.64608	6.44583	-2.00385	1.13e-09	1.68e-07	-4.01068
CHRNB2	12.8683	11.7599	11.5667	0.0553404	0.515607	0.259051	-5.38031	1.19e-09	1.74e-07	-41.6518
KCNT1	8.25714	8.86569	9.75914	1.38603	1.31245	1.66556	-2.6123	1.2e-09	1.74e-07	-6.11477
PDE6B	60.1549	62.8872	60.7273	22.7767	23.5682	25.796	-1.34628	1.29e-09	1.85e-07	-2.54256
HMGCS2	0.930309	1.42675	1.42655	9.35253	9.74965	8.73372	2.85452	1.32e-09	1.87e-07	7.23262
MAOA	44.4804	42.9756	40.6375	104.317	101.903	103.694	1.27574	1.33e-09	1.87e-07	2.42122
PARM1	2.96536	3.41556	2.73744	15.0526	14.2964	12.5455	2.19699	1.36e-09	1.9e-07	4.58521
PLEKHF2	33.4911	30.6968	33.0035	85.833	79.8722	78.2334	1.3275	1.44e-09	1.99e-07	2.50967
KRAS	266.865	222.357	234.691	588.947	613.008	562.545	1.28601	1.46e-09	2e-07	2.43852
MYO1A	13.1406	14.3086	10.4485	1.60487	1.68744	2.14642	-2.78396	1.57e-09	2.14e-07	-6.88741
MFSD13A	27.1614	32.1597	26.6297	9.72019	10.0529	9.48534	-1.5553	1.6e-09	2.17e-07	-2.93895
CACNG4	3.19794	3.67497	4.58811	0.332042	0.374987	0.40708	-3.33747	1.68e-09	2.25e-07	-10.1083
FLRT3	3.89567	3.15615	3.85555	21.9701	20.0149	19.0958	2.48488	1.71e-09	2.27e-07	5.59787
STMN3	32.8515	36.62	34.2758	10.6807	8.01534	10.177	-1.84584	1.87e-09	2.47e-07	-3.59461
MATK	77.7067	95.1171	85.2622	28.445	24.8897	28.6436	-1.65531	2.43e-09	3.18e-07	-3.14992
ALPK3	9.88453	9.03611	8.94488	1.16215	1.45307	2.14642	-2.51456	2.48e-09	3.2e-07	-5.71424
P2RX5	8.32598	9.56748	10.6584	1.20254	0.527591	1.30954	-3.21772	2.48e-09	3.2e-07	-9.30316
ADGRG6	36.3402	27.4974	31.6541	84.1174	88.9656	88.3734	1.45767	2.53e-09	3.23e-07	2.74664
SLC16A14	4.53525	3.84791	4.97366	0.332042	0.187493	0.518102	-3.62277	2.67e-09	3.39e-07	-12.3187
SEC11A	166.818	166.633	172.319	85.5484	81.6775	81.6	-1.02402	2.8e-09	3.52e-07	-2.03357
EGLN3	2.67464	3.4588	2.19766	13.1157	13.2652	14.2108	2.28496	3.21e-09	4.02e-07	4.8735
DIO2	2.55835	1.68616	1.77355	16.2701	14.7651	17.1344	3.01454	3.25e-09	4.03e-07	8.08106
IRX5	29.7908	32.2578	27.1021	78.3616	72.5197	80.7193	1.37837	3.49e-09	4.3e-07	2.59975
VSTM2L	3.25608	4.10732	3.58566	0.387383	0.609353	0.481095	-2.87029	3.9e-09	4.76e-07	-7.3121
SCAMP5	13.8411	12.7982	13.1189	3.98453	3.9852	3.40709	-1.80757	4.01e-09	4.86e-07	-3.50052
GSTM2	23.3335	20.3781	22.7877	61.3094	62.3652	64.7826	1.5042	4.25e-09	5.11e-07	2.83668
AKR1C3	18.8876	21.3405	19.1078	53.5089	49.4748	47.1737	1.33638	4.57e-09	5.46e-07	2.52518
CHN2	0.756619	1.12859	1.05255	8.09081	7.12947	6.03994	2.83031	4.66e-09	5.51e-07	7.11228
COL9A3	31.0491	39.0844	31.6155	9.96127	7.59348	7.43847	-2.03579	4.68e-09	5.51e-07	-4.10046
TENM2	20.1179	20.0178	20.4344	6.14279	5.95291	4.69993	-1.85518	5.04e-09	5.9e-07	-3.61796
RORC	24.8601	22.2172	22.3611	8.74378	6.96719	6.93802	-1.61956	5.43e-09	6.31e-07	-3.0728
ARRB1	37.2666	33.3366	32.7271	14.2312	11.8795	13.8498	-1.36881	5.66e-09	6.54e-07	-2.58257
DDIT4L	20.5249	17.294	18.1596	53.3482	53.295	49.7378	1.4844	6.23e-09	7.14e-07	2.79802
RGS1	6.39587	5.3179	5.9761	0.332042	0.7031	0.333066	-3.68202	7.18e-09	8.17e-07	-12.8351
ZNF592	101.869	98.1434	98.1071	42.6367	44.2016	48.9236	-1.13171	8.58e-09	9.7e-07	-2.19118
KLK4	478.85	545.689	540.989	214.263	194.416	217.056	-1.32318	9.27e-09	1.04e-06	-2.50217
ARHGEF38	2.68185	2.2353	2.11634	10.0256	12.6669	12.1693	2.31558	9.65e-09	1.08e-06	4.97803
CCDC170	0.2386	0.346493	0.481214	3.52983	3.20747	3.79922	3.2453	9.79e-09	1.09e-06	9.4827
IDH2	104.392	116.4	104.736	51.4277	45.0066	44.871	-1.20653	1e-08	1.11e-06	-2.30782
NPR3	52.7369	44.9644	47.8088	18.5944	18.7025	14.9139	-1.48363	1.05e-08	1.14e-06	-2.79651
SOHLH2	14.0128	14.1811	15.1523	5.81074	4.87483	4.99598	-1.47228	1.04e-08	1.14e-06	-2.7746
AK5	16.2804	16.9553	16.8488	4.59325	5.44893	4.69993	-1.76348	1.13e-08	1.22e-06	-3.39517
SDK1	6.33773	9.42522	7.66502	26.0074	28.8271	30.0129	1.85163	1.15e-08	1.24e-06	3.60907
AMER3	23.374	20.6658	19.5592	6.32476	4.31241	6.25126	-1.90999	1.34e-08	1.42e-06	-3.75806
PTGES	16.6648	18.8147	18.4147	7.16963	6.91312	6.94523	-1.35957	1.39e-08	1.47e-06	-2.56609
DDC	7.3675	6.45398	6.54854	2.08885	1.91464	1.52112	-1.88992	1.45e-08	1.53e-06	-3.70615
ACSL1	33.3797	34.8919	33.9299	15.7783	14.3613	12.9897	-1.24989	1.51e-08	1.58e-06	-2.37824
HYAL1	10.0971	9.73055	8.56172	2.64932	2.26292	2.88527	-1.85649	1.55e-08	1.6e-06	-3.62126
NID1	17.0363	15.7375	15.5379	36.248	39.1392	39.3758	1.25068	1.55e-08	1.6e-06	2.37954
ADCY1	5.25429	4.6102	3.65581	0.620338	0.592552	0.651712	-2.83569	1.62e-08	1.66e-06	-7.13886
LINC00654	17.3118	16.1878	14.2645	5.14388	5.23933	3.9914	-1.73765	1.66e-08	1.69e-06	-3.33492
LUM	16.3967	14.3972	14.7282	49.6403	41.8579	40.1899	1.5331	1.66e-08	1.69e-06	2.89408
LINGO1	20.8738	23.4766	19.4705	8.02436	5.67167	7.06839	-1.62235	1.69e-08	1.7e-06	-3.07876
B3GNT5	10.1222	7.34467	7.6781	1.36028	1.99091	1.75774	-2.28273	1.74e-08	1.74e-06	-4.86597
CD109	22.3029	18.4767	21.1443	53.525	64.0827	57.7569	1.50405	1.8e-08	1.79e-06	2.83638
PITX1	19.5365	22.7848	18.9668	6.36813	5.6248	5.77314	-1.78898	1.83e-08	1.81e-06	-3.4557
VAV3	12.9663	11.027	11.803	29.5518	29.4365	29.8279	1.31368	1.92e-08	1.88e-06	2.48575
LAD1	129.894	145.14	136.834	68.124	60.6541	62.8754	-1.10529	2.08e-08	2.03e-06	-2.15143
RNF165	4.57411	5.3231	5.44189	1.44813	1.65649	1.75374	-1.65124	2.11e-08	2.05e-06	-3.14103
TTC39B	3.29934	3.00968	3.38129	11.7717	12.4014	10.0646	1.81792	2.16e-08	2.09e-06	3.52574
ZNF710-AS1	17.2196	18.4048	18.5664	5.94294	5.85377	6.56327	-1.5588	2.72e-08	2.61e-06	-2.94608
KBTBD11	41.7767	37.2037	34.4108	15.855	15.4213	16.4682	-1.24342	2.98e-08	2.83e-06	-2.36758
ATCAY	10.474	10.5922	9.35945	1.25321	2.33612	1.631	-2.5332	3.04e-08	2.87e-06	-5.78854
SPEG	1.45583	1.42852	1.19637	6.0321	7.17162	8.28963	2.40124	3.15e-08	2.94e-06	5.28258
SPINK1	7.15175	9.76693	8.49911	33.268	26.4763	25.4121	1.73637	3.15e-08	2.94e-06	3.33196
SOSTDC1	19.2458	16.4293	16.309	6.86221	6.04666	6.51328	-1.41776	3.76e-08	3.47e-06	-2.6717
TMEM249	3.37842	5.05732	3.50611	0.461248	0.208468	0.359047	-3.53346	3.74e-08	3.47e-06	-11.5792
PBX1	31.7793	27.5145	27.0845	63.1869	69.1085	68.1195	1.21788	3.81e-08	3.5e-06	2.32605
SAMD4A	8.56715	6.51255	6.62258	1.94044	1.73557	2.04024	-1.91453	3.9e-08	3.56e-06	-3.7699
KCNC4	360.272	339.244	330.795	54.7546	70.4054	65.194	-2.43397	4.45e-08	4e-06	-5.40378
LUZP2	14.626	13.661	14.1222	5.65832	4.6848	3.99794	-1.57224	4.42e-08	4e-06	-2.97366
NOX5	15.9041	14.5091	14.2329	3.98753	4.81402	5.7287	-1.60622	4.46e-08	4e-06	-3.04453
COLEC12	112.153	118.343	115.677	58.7682	54.2006	57.3707	-1.02368	4.51e-08	4.03e-06	-2.0331
SYT4	154.896	143.454	136.641	75.0416	68.2944	66.6871	-1.05098	4.7e-08	4.18e-06	-2.07194
ANTXR1	40.0614	36.1444	34.0212	82.7893	79.3097	77.7523	1.12432	5.45e-08	4.8e-06	2.17999
ARL10	20.0651	20.4827	21.6859	8.78736	8.94313	9.19766	-1.20791	5.5e-08	4.81e-06	-2.31004
PHYHIPL	3.04937	2.42116	2.65447	0.177873	0.0937467	0	-4.99013	5.77e-08	5.01e-06	-31.7819
ZNF558	4.67652	4.38706	4.41159	12.9604	14.7666	12.6239	1.58238	5.78e-08	5.01e-06	2.99463
TMEM145	9.40489	12.0079	11.7964	1.84178	1.74753	2.33739	-2.47655	6.15e-08	5.29e-06	-5.56565
ANKRD30A	20.5249	16.4293	22.7312	63.8505	71.7974	64.6803	1.74622	6.33e-08	5.38e-06	3.35479
IFI44L	13.5476	12.1923	13.7499	34.4771	35.7644	32.1223	1.37366	6.35e-08	5.38e-06	2.59127
SH3BGRL	19.2458	21.2716	21.1284	50.4705	49.5451	45.1859	1.23297	6.31e-08	5.38e-06	2.35051
DOCK4	18.5483	15.2585	17.0465	6.08823	5.49466	6.10479	-1.52132	6.53e-08	5.51e-06	-2.87053
GPRIN3	3.17109	2.12592	2.55871	9.69039	12.8548	12.8008	2.17939	6.59e-08	5.53e-06	4.52962
FAM234B	47.423	42.9812	44.3064	89.0269	95.2886	92.8757	1.04279	6.96e-08	5.81e-06	2.06021
FCGRT	4.70982	7.30819	6.09789	20.2546	21.7026	22.9815	1.83523	7.17e-08	5.93e-06	3.56829
ZNF716	11.0196	8.45748	9.51758	27.8231	36.1758	32.7139	1.74417	7.18e-08	5.93e-06	3.35002
MMP15	56.6907	71.0783	62.4985	29.3858	26.7647	26.4602	-1.20754	7.69e-08	6.29e-06	-2.30944
UNC5A	3.31422	4.02085	4.164	0	0.14062	0.296058	-4.52596	7.65e-08	6.29e-06	-23.0383
ADAMTS1	15.4425	14.7901	13.8539	31.3105	35.2632	34.3505	1.19749	8.48e-08	6.91e-06	2.2934
FEZ1	3.92052	3.70428	3.64139	1.231	1.02675	0.958759	-1.81334	9.32e-08	7.56e-06	-3.51456
SLC6A11	3.21939	2.60449	3.05508	0.447029	0.668525	0.576714	-2.36666	1e-07	8.04e-06	-5.15745
PCDH10	1.80322	1.6441	1.38829	9.07847	7.64304	8.21892	2.37037	1.07e-07	8.52e-06	5.17072
LITAF	4.36082	6.65818	6.55444	20.1439	18.3377	19.7989	1.71899	1.12e-07	8.92e-06	3.29206
CAPN5	6.80575	6.44307	7.33963	2.55018	1.83098	1.59131	-1.80472	1.16e-07	9.12e-06	-3.49362
CIB1	74.6557	96.4932	93.0711	38.9043	38.6705	37.7104	-1.19966	1.15e-07	9.12e-06	-2.29685
SH2B2	13.3732	16.1266	15.1523	5.03598	4.87483	5.95817	-1.48846	1.18e-07	9.25e-06	-2.80588
STAC	3.25608	4.28026	3.00733	0.442723	0.28124	0.444087	-3.15387	1.21e-07	9.45e-06	-8.90038
HIVEP3	4.18639	3.71886	3.73988	1.10681	1.07809	1.14723	-1.79513	1.28e-07	9.96e-06	-3.47047
PNMA2	21.3603	23.7824	23.6432	51.6712	54.5134	51.2981	1.19292	1.29e-07	9.96e-06	2.28615
KLF9	9.30309	10.4196	8.21232	24.6818	26.2491	24.7209	1.43817	1.42e-07	1.08e-05	2.70976
KLKP1	12.1522	11.9761	13.9753	3.81849	3.28113	4.92197	-1.65578	1.42e-07	1.08e-05	-3.15093
S100A6	16.92	22.6551	19.9718	59.1589	47.4827	54.6598	1.4332	1.41e-07	1.08e-05	2.70046
EFHD1	1.97894	2.0472	1.78957	8.02436	8.86192	8.09592	2.10219	1.51e-07	1.15e-05	4.2936
JAK1	25.6998	21.8337	22.4395	9.85059	10.9401	9.77017	-1.19263	1.56e-07	1.18e-05	-2.2857
SYTL5	4.70969	4.10732	4.70377	12.2856	12.937	11.6943	1.44854	1.57e-07	1.18e-05	2.72932
POTEI	23.3844	21.5061	22.1308	47.4439	64.7389	59.3222	1.35842	1.66e-07	1.24e-05	2.56404
CNTN3	4.47711	4.58291	3.817	1.21749	1.07809	1.14723	-1.89828	1.71e-07	1.27e-05	-3.72769
DUSP4	4.94168	6.52696	4.96513	16.2147	14.8004	15.7281	1.50488	1.7e-07	1.27e-05	2.83801
LRP8	61.0651	53.8725	59.8267	26.3322	27.1492	27.7833	-1.1025	1.74e-07	1.28e-05	-2.14726
SOX2	1.10474	1.81587	1.27233	5.53404	5.67167	6.99385	2.10673	1.74e-07	1.28e-05	4.30715
IGF1R	43.2098	43.3877	39.0293	16.7489	20.6877	18.7046	-1.15832	1.78e-07	1.3e-05	-2.23197
LDLRAD4	0.290721	0.43235	0.527624	2.26896	2.43741	2.36847	2.45086	1.77e-07	1.3e-05	5.46743
MXRA7	8.44708	8.6584	8.33828	21.4495	19.4334	21.0565	1.28296	1.86e-07	1.35e-05	2.43337
CDH2	6.27958	5.53599	6.05322	14.286	15.8901	15.9871	1.37163	1.88e-07	1.36e-05	2.58763
FOXG1	2.27739	2.89674	2.55641	0.276702	0.374987	0.148029	-3.29057	2.06e-07	1.48e-05	-9.785
STX1A	17.4669	15.9146	15.7305	6.27872	6.7442	6.27944	-1.34557	2.24e-07	1.6e-05	-2.5413
NKILA	7.23053	7.36314	7.50736	2.11141	1.9932	2.74144	-1.67929	2.26e-07	1.61e-05	-3.2027
ANKRD30B	3.34307	2.51336	2.35033	10.1756	11.8418	10.501	1.99521	2.31e-07	1.63e-05	3.98674
SLC16A2	6.20098	5.76978	6.79071	16.2095	17.0731	15.1341	1.36516	2.31e-07	1.63e-05	2.57604
SPTBN4	21.746	27.4552	25.0634	9.13293	9.1403	11.0282	-1.33842	2.32e-07	1.63e-05	-2.52875
TP53INP2	30.0606	29.3133	29.3022	64.7483	66.5133	65.0588	1.14702	2.45e-07	1.71e-05	2.21456
TUBB3	56.4812	67.1828	59.0788	22.6963	19.4892	25.1481	-1.43852	2.51e-07	1.75e-05	-2.71042
MGAT5B	3.08165	4.66938	3.73988	0.608745	0.374987	0.703139	-2.74874	2.54e-07	1.77e-05	-6.72131
DAPK1	6.33773	7.39318	5.66766	1.77089	2.15617	1.85036	-1.7434	2.84e-07	1.97e-05	-3.34822
NECTIN4	8.25868	9.10381	9.68328	2.37964	3.51696	2.9484	-1.60799	2.88e-07	1.99e-05	-3.04827
BEX4	23.5267	23.6328	22.9739	52.0337	53.6409	50.1691	1.15174	2.91e-07	2e-05	2.22182
ETV1	16.0478	13.5325	13.5715	31.1567	31.7801	32.1593	1.14463	2.95e-07	2.01e-05	2.21089
FLRT2	14.4093	9.61342	12.2447	4.04871	3.80885	3.10596	-1.72887	2.96e-07	2.01e-05	-3.31468
CLIC4	65.5868	53.179	60.5707	123.464	128.386	120.704	1.05662	3.03e-07	2.05e-05	2.08005
MARC1	118.212	117.326	119.664	60.689	60.4358	62.7421	-0.949477	3.04e-07	2.05e-05	-1.93117
FLNC	11.6672	11.8082	10.4523	27.0815	24.847	26.4277	1.20854	3.14e-07	2.11e-05	2.31103
REPS1	102.178	105.584	103.626	192.089	193.19	194.432	0.896427	3.23e-07	2.15e-05	1.86145
SOD3	2.44206	2.85351	3.04589	7.96902	9.46841	10.8061	1.75427	3.21e-07	2.15e-05	3.37355
PHEX	6.07399	5.77031	4.91319	14.6968	17.1032	14.7369	1.47684	3.62e-07	2.41e-05	2.78338
SLITRK4	7.6992	6.15038	8.30998	1.40745	2.24829	1.51943	-2.09422	3.77e-07	2.49e-05	-4.26995
SLC22A23	28.4326	32.3379	30.3342	63.1909	61.7565	63.3467	1.04543	3.81e-07	2.52e-05	2.06398
EFNA5	30.1484	30.7513	30.7402	14.2816	15.3018	13.4214	-1.09286	3.95e-07	2.59e-05	-2.13296
GALNT12	1.97691	2.03204	1.77355	5.7554	6.74976	6.18022	1.69284	3.98e-07	2.61e-05	3.23292
TMEM179	12.9516	14.4922	13.9357	5.61543	4.73642	6.10069	-1.32849	4.47e-07	2.91e-05	-2.51139
MID1	31.8049	25.4654	25.8707	11.2894	12.5152	12.2864	-1.19841	4.61e-07	2.99e-05	-2.29486
PXN	174.046	194.635	173.044	93.7223	90.8326	92.4198	-0.968109	4.76e-07	3.08e-05	-1.95628
ACOT4	5.29775	8.06331	7.26151	2.13551	1.47428	1.85266	-1.92435	4.96e-07	3.18e-05	-3.79566
COL1A1	13.6309	14.1405	15.7414	29.9642	33.7261	34.6042	1.17403	4.93e-07	3.18e-05	2.25641
C5	35.1604	30.556	33.4989	68.6104	76.4084	66.3503	1.09221	5.3e-07	3.39e-05	2.132
EPB41L2	14.5526	13.249	13.1669	28.8085	30.2023	30.6567	1.13245	5.56e-07	3.54e-05	2.19231
SMPD3	15.6138	16.4682	12.6994	5.62954	5.45409	5.09025	-1.46919	5.84e-07	3.7e-05	-2.76867
MARC2	3.25608	3.80468	3.62422	0.940787	1.03121	0.742669	-1.98348	6e-07	3.79e-05	-3.95446
MMP24	8.56273	10.5014	8.92704	1.65146	1.56834	2.58862	-2.24997	6.24e-07	3.93e-05	-4.75674
KCNQ2	3.71155	4.06613	5.23368	0.985656	0.721538	1.09504	-2.20696	6.52e-07	4.09e-05	-4.61701
FIRRE	9.00227	8.07844	9.17627	18.6537	23.8731	22.2423	1.30369	6.57e-07	4.11e-05	2.4686
ZFP36L1	102.392	104.845	99.0491	200.72	190.634	199.358	0.947706	6.65e-07	4.14e-05	1.9288
CELSR3	41.4569	45.7426	40.2134	17.4322	20.0618	20.465	-1.13355	6.84e-07	4.22e-05	-2.19397
NAALADL2	25.4677	19.9773	22.8519	49.7004	63.6131	51.1308	1.27094	6.84e-07	4.22e-05	2.41319
VCX3A	74.8778	87.5597	88.1665	35.8771	32.4328	31.7806	-1.32836	7.19e-07	4.43e-05	-2.51117
STXBP6	11.4399	9.92687	9.49205	27.2905	25.2585	25.9053	1.34886	7.71e-07	4.73e-05	2.54711
ZNF703	1.80247	1.81587	1.58118	7.19425	6.51539	7.47547	2.02696	7.78e-07	4.75e-05	4.07545
IGSF3	8.89608	8.67046	6.9638	19.0298	20.5305	20.0185	1.2837	8.04e-07	4.9e-05	2.43463
PHLDB2	13.4917	13.1569	9.98675	31.4071	31.3454	32.0171	1.3765	8.81e-07	5.34e-05	2.59637
GFRA1	3.38272	2.42655	2.40077	0.221676	0.469609	0.555628	-2.64863	9.09e-07	5.49e-05	-6.2707
HES2	6.869	7.96731	8.00341	2.5207	2.34612	1.82132	-1.78078	9.46e-07	5.7e-05	-3.43613
PCDHA10	14.2241	15.1249	13.1323	30.9449	32.5983	30.7968	1.15182	9.59e-07	5.75e-05	2.22195
VIM	14.5942	14.2043	10.7641	4.42076	3.46171	3.74958	-1.76623	9.61e-07	5.75e-05	-3.40165
ABCG2	21.0482	15.4781	16.656	6.91755	6.28103	4.77394	-1.57121	1.01e-06	5.98e-05	-2.97155
PGBD5	18.718	20.4755	18.5119	9.10288	8.1055	8.68091	-1.15689	1.04e-06	6.17e-05	-2.22977
PCDH1	9.65195	13.2299	10.41	4.37189	3.18739	4.14482	-1.50989	1.06e-06	6.26e-05	-2.84789
CNTD2	6.33773	8.99287	7.98099	2.65634	1.96868	2.59051	-1.69399	1.15e-06	6.76e-05	-3.2355
CALML4	32.184	28.8161	31.1683	14.7268	14.0464	11.823	-1.1872	1.17e-06	6.81e-05	-2.27711
CD44	41.5477	43.7331	44.0342	21.5783	22.1594	23.6764	-0.938232	1.17e-06	6.81e-05	-1.91618
LRP1	15.4082	15.9563	15.8082	31.8244	51.3781	47.0796	1.46729	1.17e-06	6.81e-05	2.76502
RHOBTB1	7.79133	7.99847	8.25088	3.37576	3.14051	3.0346	-1.33402	1.22e-06	7.08e-05	-2.52105
MESP1	6.86103	8.30111	8.4051	2.82236	2.57803	3.10861	-1.46779	1.35e-06	7.81e-05	-2.76597
ERBB2	57.3871	58.011	53.1306	111.221	112.639	116.342	1.01451	1.42e-06	8.18e-05	2.02022
CAMK2D	102.16	93.6469	97.1984	181.351	186.415	176.784	0.894685	1.45e-06	8.33e-05	1.8592
RPP25	23.023	31.6912	26.025	10.8467	11.2496	11.2118	-1.27869	1.54e-06	8.81e-05	-2.42618
AMN	4.53408	4.05437	5.0746	1.17942	0.917697	1.17582	-2.0564	1.57e-06	8.94e-05	-4.15946
DSCAM	3.19794	3.19939	2.46755	7.47096	9.46841	7.54949	1.4706	1.63e-06	9.22e-05	2.77138
DSEL	108.446	87.546	92.7223	44.1729	46.3748	42.0643	-1.12125	1.71e-06	9.61e-05	-2.17536
GABARAPL1	4.70347	5.4724	3.817	13.3314	12.937	11.6013	1.4364	1.77e-06	9.9e-05	2.70645
DSC2	15.6091	10.6739	11.244	30.6068	33.6353	28.9819	1.31977	1.86e-06	0.000103787	2.49626
JAK3	2.95117	3.96667	4.25016	9.77972	10.4804	11.087	1.48041	1.95e-06	0.000108435	2.79029
DNAAF3	5.2016	4.86417	4.4706	13.2175	11.9309	14.7092	1.45793	1.97e-06	0.00010905	2.74714
MYO7A	3.5468	4.06467	4.63069	10.6807	10.5475	11.3614	1.40572	1.98e-06	0.000109318	2.6495
DLGAP3	3.95381	4.10732	4.54955	0.996127	0.7031	1.25825	-2.07584	2.01e-06	0.000110427	-4.21589
CRLF1	18.3166	22.1237	19.7871	51.9557	47.8239	58.9472	1.39672	2.04e-06	0.000111757	2.63303
GNPTAB	155.844	148.999	150.388	86.837	79.6371	77.7498	-0.899297	2.06e-06	0.000112798	-1.86516
LIX1L	10.0133	10.7513	11.1799	23.7257	23.0483	24.8465	1.16248	2.18e-06	0.000118601	2.23842
MAGEA11	2.67464	2.33469	2.35189	0.221362	0.515607	0.444087	-2.59065	2.19e-06	0.000118718	-6.0237
PKP1	8.37278	10.2467	8.09666	2.98838	1.64057	2.62752	-1.88164	2.35e-06	0.000126932	-3.68494
KIRREL1	0	0.0864699	0.154222	0.940787	1.4062	1.25825	3.68106	2.47e-06	0.000133405	12.8266
HAPLN2	7.0936	7.65259	8.67499	2.93304	2.95302	2.70153	-1.45032	2.6e-06	0.000139132	-2.73269
PDE4D	23.0384	21.0138	21.0138	42.7123	49.2194	43.9721	1.06456	2.72e-06	0.000145227	2.09153
NPNT	51.3105	44.1993	46.3607	90.4816	100.637	92.324	1.00069	2.73e-06	0.00014565	2.00096
KCNJ3	15.3264	11.5213	19.1472	40.8025	41.5983	41.9653	1.43243	2.82e-06	0.000149882	2.69901
CDH23	8.88793	9.03611	7.28699	3.37576	3.35112	3.53247	-1.29155	2.86e-06	0.000151217	-2.44791
CR2	11.7451	12.4517	12.7619	4.48257	5.76542	5.51409	-1.22497	2.87e-06	0.000151217	-2.3375
ILDR2	6.97775	4.64307	5.90083	2.16178	1.45472	1.81336	-1.68843	2.91e-06	0.000152951	-3.22306
TMEM184A	124.553	129.761	123.184	67.0814	61.6289	69.1595	-0.931388	2.95e-06	0.000154535	-1.90711
TMEM59L	4.01196	6.48524	4.31822	15.1633	13.2652	13.8777	1.50717	2.98e-06	0.000155513	2.84251
KDM4B	181.057	201.348	171.106	92.0633	92.5393	98.9429	-0.964204	3.01e-06	0.000156888	-1.95099
BMF	7.67505	7.3116	6.40164	16.4836	18.2862	18.5275	1.32036	3.36e-06	0.00017443	2.49729
SLFN11	61.1821	57.4466	52.6663	113.123	113.359	108.563	0.969567	3.4e-06	0.000176263	1.95825
SLC40A1	11.28	10.3332	11.2582	23.2983	25.5928	22.6115	1.12102	3.42e-06	0.00017633	2.175
CPPED1	24.3919	21.709	23.0616	11.7377	11.0935	11.755	-0.997999	3.47e-06	0.00017788	-1.99723
IGF1	18.0583	15.3037	15.6563	35.6597	37.9576	34.8956	1.14847	3.52e-06	0.000179967	2.21679
NFATC1	2.26763	2.5941	2.12055	7.24959	6.51539	7.66051	1.61627	3.55e-06	0.000180911	3.06581
AZGP1	180.556	195.951	195.09	98.5159	97.3553	98.7599	-0.956535	3.64e-06	0.00018516	-1.94064
CAMKV	8.02391	9.59816	8.55932	3.20974	2.67178	2.29445	-1.6892	3.66e-06	0.000185644	-3.22478
SPATA6	3.35737	3.09152	3.5524	8.70878	9.17878	9.11509	1.43136	3.68e-06	0.000186087	2.697
NAT16	5.29113	5.96642	5.9761	2.37964	1.73431	1.70258	-1.57716	3.9e-06	0.000196214	-2.98382
CHRM4	4.0701	4.10732	4.04833	0.498064	1.07809	0.999197	-2.21577	3.97e-06	0.000199256	-4.64528
FZD8	32.9678	41.4623	33.312	92.0311	77.6691	94.8355	1.29448	3.98e-06	0.000199311	2.45288
TDRD5	7.15175	6.26907	6.09177	2.65634	2.71865	2.44248	-1.31765	4.27e-06	0.0002132	-2.49259
APLP1	55.9352	64.6931	56.1825	128.848	111.881	125.919	1.05127	4.52e-06	0.000224786	2.07235
AFAP1	17.1723	18.4966	16.8744	9.24272	8.2773	8.73987	-1.00179	4.6e-06	0.000228019	-2.00249
DPYSL4	9.1868	10.3332	9.67743	4.26121	3.5155	4.5889	-1.23694	4.61e-06	0.000228023	-2.35698
TMBIM1	38.1758	40.2531	35.2144	79.0565	71.0268	76.0644	0.993211	4.68e-06	0.000230822	1.99061
BHLHA15	8.1402	10.7655	8.17377	2.54566	2.43741	3.21963	-1.71374	4.71e-06	0.000231778	-3.2801
BMX	0.523299	0.734994	0.732555	2.76702	3.74987	3.0346	2.23658	5.02e-06	0.000246212	4.7128
KLF12	7.0936	5.1882	6.40021	16.1041	19.1243	14.1738	1.40475	5.18e-06	0.000253216	2.64771
SALL2	6.09929	6.83912	7.32555	17.4104	16.4057	17.5785	1.33873	5.26e-06	0.000256446	2.52929
CYP4F35P	3.79362	5.56983	6.52339	14.5123	19.705	18.9485	1.73255	5.36e-06	0.000260382	3.32314
BAHCC1	150.613	152.057	148.975	77.0283	85.9657	81.8971	-0.882326	5.84e-06	0.000282714	-1.84334
LAMC3	15.8779	16.9689	18.1861	7.69284	6.42617	7.34249	-1.25113	5.97e-06	0.000288224	-2.38028
LONRF2	95.9134	76.8005	79.9277	33.561	41.3548	37.3365	-1.16597	6.11e-06	0.000294083	-2.24384
LOC102725072	3.26998	4.03059	3.63063	0.688565	0.697041	1.28926	-1.9953	6.3e-06	0.000302662	-3.98699
MAT1A	1.62804	1.29705	1.61933	5.36802	8.10909	7.51248	2.20869	6.37e-06	0.000305155	4.62256
COLEC11	1.39816	1.31823	0.850972	0.276702	0.0468733	0.107858	-3.06784	6.42e-06	0.000306679	-8.38519
DOK6	75.6623	61.0564	68.6956	130.22	139.106	133.915	0.975279	6.72e-06	0.000320169	1.96602
WDR44	30.2932	27.1083	28.7624	54.787	56.0605	52.5133	0.923712	7.03e-06	0.000333796	1.89699
EFCC1	2.61649	2.03204	2.429	0.664085	0.42186	0.444087	-2.21728	7.14e-06	0.000338018	-4.65016
CTTNBP2	0.523299	1.08087	1.50366	5.03598	4.82795	6.29124	2.33677	7.3e-06	0.000344113	5.0517
ELF5	8.90405	7.38254	8.29986	2.88554	2.94062	3.0438	-1.46649	7.31e-06	0.000344113	-2.76349
FAM129A	34.0896	30.5471	32.9929	17.1745	17.3538	17.4396	-0.907903	7.6e-06	0.000356643	-1.87632
ACO1	25.1188	25.6751	25.4709	49.5949	49.4407	46.4822	0.931019	7.66e-06	0.000358539	1.90662
CDON	6.59307	7.15476	7.50613	13.9837	16.4516	18.0122	1.18775	7.89e-06	0.000368436	2.27796
TARP	19.2023	22.4465	23.8035	65.3352	56.827	62.953	1.49612	8.04e-06	0.000374179	2.82083
KIAA1456	1.54817	1.90531	2.76118	6.07682	6.41568	6.97252	1.63017	8.17e-06	0.000379388	3.09549
FAM81A	19.2458	16.9049	17.7355	9.54557	8.48407	8.51168	-1.0223	8.27e-06	0.00038262	-2.03116
BEX5	4.24453	4.88555	4.78088	11.6768	10.7809	10.7691	1.25173	8.4e-06	0.000387592	2.38127
PLCB2	2.90721	3.19939	3.70133	0.774766	0.84372	0.999197	-1.89223	8.47e-06	0.000389244	-3.71208
BMPR1B	14.4443	11.5866	12.7178	5.40012	6.25711	4.58436	-1.25554	8.56e-06	0.000390453	-2.38756
PIK3AP1	1.45361	1.94864	1.96362	0.332042	0.608094	0.333066	-2.07635	8.57e-06	0.000390453	-4.21738
PLK2	1.33732	1.38352	2.00489	6.25347	6.18728	7.80854	2.08549	8.58e-06	0.000390453	4.24418
IMP3	57.1904	61.4924	58.5533	32.2517	26.9756	29.2845	-1.0041	8.64e-06	0.000392196	-2.00569
MBP	8.49165	7.41627	7.98761	19.6057	17.8865	18.5906	1.23151	8.66e-06	0.000392302	2.34813
DZIP1L	1.5699	1.38352	1.42655	4.03985	5.15607	4.88496	1.68751	8.72e-06	0.000393736	3.22101
LINGO4	1.91876	3.06968	2.81455	0.276702	0.749973	0.222044	-2.65455	9.13e-06	0.000411341	-6.29649
ARHGAP29	24.49	18.7818	19.6764	45.8481	48.1369	47.3431	1.17139	9.76e-06	0.000438498	2.25228
ACTL8	1.97691	1.98881	1.85066	0.553404	0.234367	0.259051	-2.50478	9.8e-06	0.000438983	-5.67564
SLC9A2	1.74433	1.98881	2.27478	0.387383	0.0468733	0.40708	-2.80293	9.85e-06	0.000440099	-6.97855
NFIX	895.396	970.691	882.882	484.778	466.685	506.704	-0.91468	1.03e-05	0.000456767	-1.88515
P2RX7	15.6855	16.4296	17.2962	8.66833	7.37596	6.63636	-1.13047	1.13e-05	0.000500821	-2.18931
AOX1	3.5468	3.32909	2.19766	8.90981	8.95281	9.69591	1.61172	1.16e-05	0.000511889	3.05616
PLEK2	6.62845	6.57171	6.05322	2.82236	2.67178	2.66452	-1.23749	1.16e-05	0.000511889	-2.35789
PIAS4	37.0961	44.3591	38.0543	19.6458	19.1243	18.9185	-1.05235	1.18e-05	0.00051947	-2.0739
CYP4F22	0.581443	1.59969	1.19522	0.166021	0.0468733	0.185036	-3.04296	1.18e-05	0.000520232	-8.2418
RBM11	3.5468	3.41556	3.50855	8.24572	8.85906	8.73372	1.30286	1.19e-05	0.000523335	2.46718
PM20D2	26.4176	22.1539	28.2321	9.55392	13.4214	10.7984	-1.18308	1.31e-05	0.000573233	-2.2706
MANEAL	40.9243	42.2804	35.8394	21.2454	19.1002	19.7377	-0.986533	1.34e-05	0.0005822	-1.98142
MBOAT2	75.8579	66.1548	67.2213	36.112	37.551	34.4987	-0.95101	1.34e-05	0.0005822	-1.93323
FAM174B	13.1673	15.1989	11.104	5.09132	5.33745	6.36525	-1.22409	1.39e-05	0.000604987	-2.33608
FAM222A-AS1	6.62845	6.05289	4.89655	2.49032	2.34367	2.01469	-1.35997	1.4e-05	0.000605319	-2.56679
PLTP	8.26487	11.1746	9.55311	23.1257	19.5176	24.8473	1.21521	1.44e-05	0.000621085	2.32175
ANKRD34A	6.68659	7.0473	6.36166	15.5507	14.8611	15.247	1.18369	1.47e-05	0.000632558	2.27158
KCNA6	4.68597	4.41935	4.62666	1.38351	2.15617	1.1888	-1.54224	1.5e-05	0.000643061	-2.91246
BATF3	6.97731	10.5493	8.98343	3.70781	3.28113	3.47869	-1.34467	1.51e-05	0.000644631	-2.53972
AZGP1P1	9.50428	7.11231	8.64465	3.53186	2.67237	3.6763	-1.34796	1.52e-05	0.000648821	-2.54552
MCTP2	20.9369	18.1788	20.2034	10.4044	10.2184	9.32737	-0.987028	1.53e-05	0.000648997	-1.9821
RAB39A	6.33773	4.88555	6.40021	2.21362	1.64057	1.92438	-1.60896	1.53e-05	0.000648997	-3.05033
UGT2B10	1.2555	1.66586	1.21859	4.19715	4.33827	3.62841	1.5467	1.53e-05	0.000648997	2.92148
SYCP3	8.55638	6.13464	10.6138	2.64976	2.08296	1.36906	-2.07351	1.55e-05	0.000653268	-4.2091
PRSS36	3.83752	4.92879	3.85555	1.49419	1.4062	0.851168	-1.7676	1.6e-05	0.000671244	-3.40487
KCNQ4	25.9324	26.0274	25.9479	13.5584	12.5152	14.2848	-0.947364	1.65e-05	0.000693076	-1.92835
MAP1B	171.077	141.1	173.829	64.4719	84.2106	72.8068	-1.13214	1.66e-05	0.00069348	-2.19183
SSX9	1.48901	1.997	2.77446	7.76074	7.90108	6.36264	1.79359	1.68e-05	0.00070083	3.46678
UNC5C	4.41897	4.02085	3.77844	1.71555	1.59369	1.88737	-1.22246	1.72e-05	0.00071605	-2.33344
SNAP25	5.34927	4.62614	3.93266	1.05147	1.73431	1.29526	-1.75624	1.73e-05	0.000719258	-3.37816
TRIM2	1.2386	1.22004	1.19887	0.230392	0.238755	0.383407	-2.04234	1.91e-05	0.00079111	-4.11914
MRPL54	19.9435	25.5951	20.3188	9.96127	9.46841	11.0282	-1.11074	1.93e-05	0.000798422	-2.15956
SEMA3F	8.77979	9.94404	8.82921	3.37576	2.8124	4.36686	-1.37553	1.97e-05	0.000809502	-2.59463
GPLD1	3.70651	2.1876	2.64314	7.75527	7.76125	8.33805	1.49415	2.02e-05	0.000828057	2.81697
IGF2BP1	26.0463	20.8369	23.4031	44.2835	48.3015	46.8618	0.991285	2.05e-05	0.000837144	1.98795
ZNF641	15.8526	14.0108	14.3149	27.5223	30.9119	31.9359	1.03572	2.05e-05	0.000837449	2.05013
ASB9	16.513	19.023	17.3403	38.832	32.5301	35.2721	1.00941	2.06e-05	0.000837799	2.01309
CEP126	10.6845	8.42359	10.3051	21.4928	22.5393	20.672	1.13838	2.13e-05	0.000863659	2.20134
EPS8L3	4.88412	4.49644	4.20255	11.9535	9.98402	10.8431	1.27236	2.2e-05	0.00089097	2.41556
EPHB3	24.8858	23.2338	22.4418	11.1306	10.502	12.9311	-1.0229	2.22e-05	0.000896538	-2.032
LOC100653233	0.988453	1.46999	1.11811	4.59325	3.74987	4.29285	1.80728	2.22e-05	0.000896538	3.49981
SEMA3D	1.62804	1.73107	1.39494	4.86996	4.73815	5.07326	1.62736	2.25e-05	0.000904462	3.08948
PDZD4	10.6985	10.852	9.63888	3.98451	2.67178	4.66292	-1.45515	2.31e-05	0.000928693	-2.74186
EDN1	3.60495	2.98321	2.96877	8.46708	7.40599	7.29044	1.28004	2.35e-05	0.000939202	2.42845
STS	26.3975	26.2869	23.943	13.8904	13.8276	12.8785	-0.916829	2.4e-05	0.000958045	-1.88796
PODXL2	152.978	185.348	165.056	92.5845	84.2782	89.2616	-0.920672	2.41e-05	0.000960367	-1.893
SSFA2	89.9875	79.594	79.7044	148.66	157.023	145.73	0.858112	2.45e-05	0.000975455	1.81267
CHSY1	43.3305	46.8726	42.0851	22.5789	24.0236	24.1306	-0.901696	2.46e-05	0.000976221	-1.86826
CNNM1	38.2647	37.5233	41.781	20.2669	21.4575	20.1785	-0.926301	2.48e-05	0.000980458	-1.9004
LINC00511	7.28429	6.96969	7.73571	2.67793	2.88905	3.21384	-1.31809	2.48e-05	0.000980458	-2.49335
TESC	1.88089	2.33471	2.16366	0.719425	0.709083	0.592117	-1.66499	2.65e-05	0.00104222	-3.17112
STK39	52.5624	49.9364	47.3847	28.7217	26.7178	27.0523	-0.861192	2.81e-05	0.00110243	-1.81654
TLX1	6.86103	7.60287	7.09421	2.71168	2.8124	2.77555	-1.37569	2.96e-05	0.00115696	-2.59491
C15orf39	39.1311	45.6994	38.17	20.5866	17.39	22.0934	-1.03229	3.09e-05	0.00120429	-2.04527
IL1R2	0.755876	1.21058	1.00244	0.276702	0.0468733	0.222044	-2.43535	3.1e-05	0.00120473	-5.40896
DTX3	27.8511	26.9786	25.5623	53.3482	47.2014	53.7716	0.942205	3.12e-05	0.00121016	1.92146
GRAMD1C	10.5823	9.41483	9.65617	18.9266	22.8012	18.6887	1.02832	3.12e-05	0.00121016	2.03965
ESRRB	0.872164	1.25381	0.848221	0.0553404	0.14062	0.296058	-2.4535	3.23e-05	0.00124911	-5.47745
CHST13	1.62804	1.59969	1.61933	0.442723	0.515607	0.333066	-1.91212	3.25e-05	0.00125461	-3.76361
GOLGA2P7	61.0476	62.531	61.6974	33.2536	33.3333	35.8077	-0.854118	3.41e-05	0.00131063	-1.80765
AGAP2-AS1	5.62896	7.0161	5.72688	2.55586	1.1341	1.49148	-1.84445	3.45e-05	0.00132301	-3.59116
NPY2R	0.290721	0.51882	0.462666	0.0553404	0.0468733	0.0370073	-3.11559	3.46e-05	0.00132301	-8.66732
MRPL46	20.1445	21.2185	20.4786	9.20303	11.8006	9.90517	-0.99948	3.47e-05	0.0013255	-1.99928
CNN3	53.0857	51.8387	49.1968	27.3935	29.0615	27.2374	-0.880125	3.58e-05	0.00135844	-1.84053
PDGFRB	0.988453	1.12411	2.12055	0.276702	0.187493	0.333066	-2.38938	3.59e-05	0.00135844	-5.23933
TM6SF2	1.1212	0.591508	1.05968	3.00026	3.52408	3.47681	1.8572	3.58e-05	0.00135844	3.62303
ACOXL	2.22197	2.29833	2.2687	0.508168	0.813895	0.372311	-2.01028	3.66e-05	0.00138376	-4.0286
OVOL1	4.88412	3.76144	3.13921	0.761833	1.19282	1.01428	-1.96708	3.73e-05	0.00140162	-3.90976
SIPA1L2	21.8041	21.4013	21.7453	37.4101	41.436	40.1529	0.874111	3.73e-05	0.00140162	1.83288
BMP6	3.25608	3.41556	3.54711	0.940787	1.49995	1.36927	-1.40894	3.88e-05	0.00145624	-2.65541
CPNE4	2.90721	2.76704	2.776	0.830106	0.98434	0.481095	-1.89537	3.9e-05	0.00145775	-3.72018
TRPC1	3.25608	2.81027	3.00733	6.08745	8.62469	7.03139	1.26361	3.92e-05	0.00146352	2.40096
FKBP5	423.041	411.968	408.648	248.276	233.974	222.543	-0.819602	3.93e-05	0.00146359	-1.76492
CLDN4	86.4928	103.661	88.5127	49.0149	45.5759	47.7872	-0.969857	3.99e-05	0.00148243	-1.95865
F5	0.639587	0.389115	0.501222	2.3243	2.01555	1.5173	1.93622	4.25e-05	0.00156079	3.82701
HECA	32.3625	32.5971	32.5545	57.1936	58.4142	57.8777	0.831012	4.24e-05	0.00156079	1.77893
LOC101927480	25.6182	28.5234	25.1449	50.4773	49.2512	47.5635	0.892465	4.25e-05	0.00156079	1.85635
NT5E	0.988453	1.12411	0.925332	3.1544	3.28113	2.47949	1.54417	4.23e-05	0.00156079	2.91635
LRRN1	1.91876	1.59969	1.65789	4.70393	3.79674	4.18182	1.29461	4.39e-05	0.00160234	2.45311
EFNB3	15.1175	18.1154	13.5715	34.9751	29.3896	34.3798	1.07705	4.42e-05	0.00160997	2.10972
LRRK1	25.5267	30.8062	33.9173	11.6178	15.5979	14.7542	-1.10324	4.47e-05	0.00162524	-2.14836
DUSP2	27.0371	34.3718	25.1382	13.8904	12.5621	11.8053	-1.18093	4.54e-05	0.00164255	-2.26723
KIF26A	4.5934	5.05849	3.85555	11.2341	10.0309	11.1762	1.26508	4.54e-05	0.00164255	2.40341
TRIM47	24.4744	27.8153	27.209	12.6549	11.3939	14.4446	-1.04436	4.58e-05	0.00165444	-2.06245
LGI3	4.82598	4.40997	4.20255	0.553404	0.656227	1.66533	-2.16079	4.62e-05	0.00166117	-4.4716
LGR4	20.5831	14.5269	16.6174	33.1489	36.0925	35.638	1.02587	4.62e-05	0.00166117	2.03618
MAN2C1	62.2263	60.5325	62.984	32.0217	29.3402	35.035	-0.944089	4.66e-05	0.00167315	-1.92397
DAGLA	14.1779	17.3133	16.0631	7.43411	7.36473	8.69758	-1.01504	4.83e-05	0.00172796	-2.02096
CAMKK1	26.4314	28.4787	27.3602	15.6278	14.9697	13.5648	-0.900888	4.84e-05	0.00172946	-1.86721
LOC100288175	4.38192	5.41093	5.20895	11.0484	13.0755	11.2165	1.23146	4.85e-05	0.00172946	2.34805
TRIM38	5.2886	4.53099	6.59597	12.8738	13.9369	14.0125	1.3113	4.92e-05	0.00174936	2.48166
HSPG2	2.79353	4.11546	3.74036	8.03079	8.92131	9.85727	1.32519	4.98e-05	0.00176843	2.50565
CPAMD8	13.3168	12.8966	14.0921	6.70365	6.99575	7.42256	-0.92932	5.15e-05	0.00182404	-1.90438
ANKRD29	1.53326	0.844406	1.51735	4.69632	3.95533	4.28943	1.73316	5.38e-05	0.00190315	3.32455
NR3C2	10.466	7.73906	10.063	17.7089	20.343	21.7233	1.08461	5.46e-05	0.00192645	2.1208
MAPT	5.24908	5.77471	6.16289	1.92022	2.58269	2.79941	-1.22481	5.58e-05	0.00196446	-2.33724
CDC42EP1	37.2705	40.2485	35.6253	19.8119	17.3431	19.0589	-1.0095	5.63e-05	0.00197801	-2.01321
TMEM266	3.70779	5.09428	4.16313	1.51998	1.4278	1.92608	-1.4027	5.64e-05	0.00197801	-2.64396
THSD4	4.14485	3.77623	3.43475	6.91763	10.2095	9.53478	1.23893	5.77e-05	0.00201826	2.36024
AMBP	5.98886	7.65259	7.44121	16.7128	13.9683	15.9501	1.13962	5.8e-05	0.00202625	2.20323
FCHSD1	6.45868	7.41195	7.34547	16.7184	17.2561	18.3287	1.29918	5.89e-05	0.00205255	2.46088
KREMEN1	14.3438	14.0719	13.5563	27.6487	26.4859	26.2494	0.937658	6.03e-05	0.00209745	1.91542
SPOCK1	188.969	178.777	173.77	109.353	104.387	98.9205	-0.792778	6.06e-05	0.002104	-1.73241
NRCAM	1.91876	1.25381	1.42655	4.53791	4.17173	4.25584	1.50469	6.12e-05	0.00211978	2.83765
OPTN	2.17821	3.02991	1.81965	7.92286	6.4399	6.64648	1.57634	6.24e-05	0.00215728	2.98212
KIAA1024	4.12824	4.4532	3.70133	1.77089	1.45307	1.5173	-1.37425	6.27e-05	0.0021619	-2.59233
MIA3	173.299	154.287	171.694	290.776	328.351	303.383	0.886114	6.37e-05	0.00219323	1.84819
PAGE1	2.03505	2.24822	2.66033	0.774766	0.98434	0.629124	-1.54955	6.46e-05	0.00221908	-2.92725
HOXD9	0.40701	0.691759	0.886777	2.65634	2.01555	2.81255	1.87172	6.51e-05	0.00222574	3.65968
PRRX2	5.05855	6.00966	6.09177	2.65634	1.68744	2.36847	-1.35766	6.58e-05	0.00224578	-2.56269
SMARCA1	8.77979	8.12817	9.98588	3.20974	2.76553	3.29365	-1.53513	6.78e-05	0.00230762	-2.89816
CD59	26.8057	25.4531	27.7746	51.9726	46.9563	47.4264	0.869615	6.85e-05	0.00232764	1.82718
CLDN1	3.0235	2.33469	2.81455	6.58551	6.04666	6.55029	1.23335	6.86e-05	0.00232764	2.35112
UGT2B15	8.40314	4.71512	7.10781	24.1436	23.7609	19.3551	1.73964	7.13e-05	0.00240659	3.33952
FAM198B	5.98107	5.50028	4.54063	12.6409	10.6181	11.0294	1.10165	7.2e-05	0.00242804	2.14601
LINC00993	1.54132	1.00679	1.47704	2.94704	5.74212	4.83619	1.75539	7.42e-05	0.0024948	3.37618
C7orf31	1.62804	2.20498	1.31089	5.03598	4.73421	4.73693	1.49367	7.44e-05	0.00249604	2.81605
PROS1	25.8742	20.4069	23.4418	43.5529	45.3265	44.7048	0.941136	7.66e-05	0.00256048	1.92004
ATP2A3	8.60939	8.30658	8.0396	3.83188	4.31235	3.45181	-1.10654	7.73e-05	0.00257854	-2.15329
ETNK2	15.2819	19.326	15.3964	36.6907	33.5178	34.3428	1.06183	7.75e-05	0.00257975	2.08758
FAM169A	16.7691	13.3926	14.5924	33.0133	27.5549	28.0455	0.987287	8.42e-05	0.00279691	1.98245
CTNND2	11.2218	11.3276	9.25332	4.81462	4.87483	5.66212	-1.04391	8.47e-05	0.00280839	-2.06181
NEGR1	26.2555	23.4572	27.4348	46.7171	47.1321	46.9922	0.868261	8.51e-05	0.00281598	1.82546
ZNF835	2.70755	2.78995	2.2219	1.02281	1.03207	1.05873	-1.30029	8.61e-05	0.00284451	-2.46279
PELI2	3.0235	3.50203	4.27966	1.77089	0.98434	0.888175	-1.59842	8.7e-05	0.00286155	-3.02811
RELN	3.5468	2.76704	1.81211	0.387383	0.937467	0.81416	-1.86895	9.11e-05	0.00299013	-3.65268
CCDC85A	1.55043	1.58645	1.03881	0.4545	0.374987	0.180509	-2.07537	9.15e-05	0.00299897	-4.21453
FREM2	9.9674	8.42558	8.86163	18.0715	22.4326	17.7924	1.09953	9.18e-05	0.00300124	2.14285
NCKAP5L	2.2491	2.68966	3.21123	6.17693	6.45503	6.8578	1.24898	9.22e-05	0.00301082	2.37673
FOXN4	2.67464	3.50203	3.93266	1.10681	1.54682	1.14723	-1.41576	9.45e-05	0.00307804	-2.66799
PTCH2	3.37237	3.37233	4.24111	1.38351	1.35933	1.66533	-1.31114	9.47e-05	0.00308065	-2.48138
UNC5B	4.37116	4.58998	3.70652	1.67005	1.66059	1.81782	-1.29109	9.57e-05	0.00310712	-2.44713
NTNG2	1.864	2.77505	2.50983	0.6653	0.566929	0.778152	-1.82066	9.62e-05	0.00311047	-3.53242
RHOD	2.73278	3.93438	3.39288	8.41174	8.90593	10.4731	1.46045	9.65e-05	0.00311334	2.75194
COL26A1	2.20948	2.07528	1.34944	0.332042	0.28124	0.666131	-2.06464	9.73e-05	0.00313181	-4.18329
NPTX1	9.59381	11.0249	9.36899	5.64472	3.32801	3.58971	-1.26728	9.96e-05	0.003202	-2.40707
ETV5	9.7101	9.46879	8.48236	21.2507	16.7883	18.955	1.04382	0.0001	0.00320388	2.06168
LPCAT2	0.617544	1.38974	1.10076	4.15195	2.93026	3.53095	1.73972	0.000100067	0.00320388	3.3397
ZBTB18	2.55835	3.15615	2.96877	6.69619	6.51539	6.99438	1.21315	0.000100529	0.00321249	2.31843
DDN	46.0164	48.0847	41.1568	24.3126	24.5048	25.1394	-0.869372	0.000101318	0.00322529	-1.82687
NELL2	29.7699	32.2533	22.902	13.7244	14.5307	13.6187	-1.0181	0.00010574	0.00335963	-2.02525
EMP1	2.09319	1.76325	1.79609	4.81462	5.35231	4.82413	1.4102	0.000106524	0.00337658	2.65774
MUM1L1	2.03505	2.11851	1.07955	3.98451	6.37477	5.84715	1.64519	0.00010668	0.00337658	3.12788
MALL	2.47483	2.85605	3.10152	0.76149	0.856509	1.14744	-1.58989	0.000111096	0.00350967	-3.01026
FEM1A	35.0005	38.021	35.4624	17.9077	17.6692	21.4653	-0.924015	0.000112446	0.00354557	-1.89739
KIF5C	2.74122	2.59498	2.47075	1.04854	0.836852	0.752216	-1.57363	0.000113375	0.00355463	-2.97653
LAMA3	2.55835	2.55086	2.54466	6.36415	8.4372	7.43847	1.53839	0.000113046	0.00355463	2.90471
TUBA3D	2.1449	2.81305	2.17099	0.774766	0.656227	0.96219	-1.55899	0.000113335	0.00355463	-2.94648
GGT1	15.6307	17.1129	16.4754	7.41573	6.54901	9.23262	-1.07939	0.000113689	0.00355777	-2.11314
GAL	58.0861	70.9053	59.5297	33.5916	26.4366	32.8995	-1.02154	0.000115089	0.00359481	-2.03009
FAM178B	9.47068	11.2165	8.03127	4.48951	3.93625	4.10424	-1.19679	0.000115705	0.00360726	-2.29228
ADAP1	3.48931	5.38625	5.70622	1.96627	2.01555	1.98435	-1.29565	0.000119628	0.00371562	-2.45488
GMPR	4.78475	6.53242	5.78333	2.8777	2.06507	2.5914	-1.18785	0.000120182	0.00372587	-2.27812
TMEM62	14.1984	17.2569	14.6896	30.3265	29.0615	29.3178	0.940689	0.000120413	0.00372607	1.91944
TLL2	2.45383	2.31982	2.76005	0.665322	0.996976	1.04977	-1.45349	0.000124982	0.00386027	-2.7387
PPP2R3A	8.43188	9.15389	8.7339	18.6132	17.2638	16.847	1.00013	0.000127066	0.00391697	2.00018
TRIM36	129.322	106.733	116.088	65.025	68.0612	61.7946	-0.852907	0.000127289	0.00391697	-1.80614
DLG5	29.9577	28.0665	26.574	49.4374	49.3109	52.7282	0.842813	0.000128883	0.00395139	1.79354
EGFL7	2.26763	3.71821	2.85311	8.0797	6.98413	7.21642	1.3237	0.000130424	0.00399127	2.50307
PRRT2	41.922	39.7324	45.3908	81.2457	86.1784	89.7787	1.01746	0.000132088	0.00403475	2.02435
PTK7	11.0049	12.9179	12.5101	22.8323	23.2389	23.5619	0.93172	0.00013246	0.00403869	1.90755
PUDP	2.96536	3.37233	1.92778	7.74766	6.60914	6.66131	1.34949	0.000137914	0.00419728	2.54822
TMEM132D-AS1	17.0363	18.2418	16.9759	8.87135	8.38213	8.68203	-1.01074	0.000140509	0.00426843	-2.01494
TRABD2B	1.86062	2.16175	1.58004	0.110681	0.515607	0.481095	-2.26581	0.000141431	0.00428862	-4.80925
SATB2	23.1327	20.2682	20.9368	37.2456	38.8831	39.824	0.852433	0.000141965	0.00429695	1.80554
ARID5A	9.47752	13.2731	10.9112	5.97676	4.68733	4.5889	-1.1494	0.000149358	0.00451251	-2.21821
SORBS1	25.1765	24.471	22.2483	43.7746	43.4095	41.9663	0.846291	0.000149951	0.0045222	1.79787
HGF	40.0614	31.1724	41.293	68.5668	82.9658	71.3501	0.986922	0.000152394	0.00458757	1.98195
PLSCR4	3.19794	3.32909	4.12544	7.58164	7.82785	7.91956	1.12486	0.000155149	0.00466205	2.18081
PTGER3	2.38392	1.81587	1.85066	0.830106	0.468733	0.444087	-1.81142	0.000156564	0.00469608	-3.50988
GCK	9.59381	10.2899	9.21477	4.37189	3.98423	4.21883	-1.20991	0.000157852	0.00472618	-2.31323
ADGRL3	6.51216	4.06409	4.66522	11.7322	11.6246	11.3982	1.19674	0.0001654	0.00493253	2.29221
PIK3R5	5.05855	5.44761	4.20255	1.49419	2.24992	2.14642	-1.30519	0.000165635	0.00493253	-2.47116
SHC2	6.27958	8.86317	8.44366	17.1555	17.9994	21.0201	1.2475	0.000166856	0.00496001	2.3743
CAB39L	22.56	24.471	25.1382	12.8943	13.2183	12.8045	-0.892251	0.000169825	0.00503924	-1.85607
HENMT1	41.3987	40.7837	43.4135	24.6346	24.4262	22.5418	-0.812962	0.000175522	0.00519902	-1.75682
DGKE	10.073	10.7388	11.0063	19.2189	23.1768	20.1622	0.973571	0.000177518	0.00524879	1.9637
CYP4F62P	2.87096	4.18635	2.34568	6.59904	8.9047	8.72392	1.36674	0.000178885	0.00527981	2.57887
CHMP1B2P	7.15175	5.83672	6.59299	2.86196	3.42175	2.22044	-1.20675	0.000184672	0.00544096	-2.30817
CHD5	11.1171	11.9336	8.99435	5.00914	5.20875	4.84834	-1.08715	0.00018643	0.00548302	-2.12454
KCNJ9	2.61649	2.89674	2.96877	0.498064	1.21871	0.999197	-1.61893	0.000189921	0.00557582	-3.07147
CXXC4	3.00437	4.65956	4.03884	8.52014	8.66355	8.65971	1.13334	0.000190545	0.00558428	2.19366
SLITRK3	8.09275	8.48669	7.18977	4.54701	2.9598	3.225	-1.1535	0.000192169	0.00562195	-2.22452
AKAP2	5.23299	6.39877	7.13277	13.3924	13.312	12.2494	1.04705	0.000195192	0.00570037	2.06631
TNNT1	26.1649	33.0747	33.5818	67.2939	59.8572	65.1328	1.04665	0.000195882	0.00571048	2.06573
VWA5A	1.27917	0.994404	1.54222	4.09519	3.98423	3.07161	1.53512	0.000196922	0.00573075	2.89813
TNFAIP2	14.7686	14.4405	13.392	7.3179	6.52906	7.24901	-1.01255	0.000197704	0.00574344	-2.01748
ALDH3B1	12.2566	12.1652	14.6636	6.61831	6.887	5.94082	-1.01011	0.000198999	0.00577096	-2.01406
LRRN2	2.5623	2.49086	2.33022	1.1636	0.750014	0.954079	-1.36523	0.000200949	0.00581737	-2.57617
SQLE	52.4461	58.0213	54.1705	95.6836	98.0121	92.2962	0.795373	0.000202931	0.00586452	1.73553
CIDEB	6.36531	6.90927	5.70129	2.11741	2.60673	2.21578	-1.44752	0.000206106	0.00594594	-2.72739
TGFA	3.95381	3.15615	3.817	1.60487	1.26558	1.29526	-1.39335	0.000207962	0.00597872	-2.62688
TMEM171	1.68618	2.16175	2.31333	0.774766	0.749973	0.370073	-1.73545	0.00021382	0.00613653	-3.32984
SLC1A1	16.9781	16.4293	17.35	10.2933	8.95281	7.88255	-0.911038	0.000215947	0.00618689	-1.8804
AMPD3	4.24833	3.63485	4.72186	9.41373	9.281	9.92141	1.1814	0.000216336	0.00618735	2.26797
LAMB1	31.8656	30.5058	31.7659	53.4306	55.7687	54.9	0.802135	0.000218916	0.00624793	1.74368
SOX11	1.54024	1.72771	2.55864	0.820092	0.445147	0.817645	-1.4893	0.000220951	0.00628689	-2.80753
PTGER4	2.56384	3.21662	2.68041	6.73619	5.99132	7.41552	1.2484	0.000222358	0.00631611	2.37578
KCNQ1	2.30289	2.78289	2.54489	5.43344	5.31319	7.08677	1.22293	0.000224959	0.0063791	2.3342
ARMC4	1.10474	1.25381	1.58078	3.70781	3.16933	3.40467	1.36697	0.000226629	0.0064155	2.57928
YPEL3	10.4934	12.7014	11.6326	24.6704	22.1279	24.7934	1.03681	0.000232866	0.00658085	2.05168
IKZF3	6.50026	5.60923	5.17265	10.22	14.7811	12.1029	1.10718	0.000238066	0.00671637	2.15424
PARVB	68.9089	78.5185	73.0053	42.8562	43.5099	40.8415	-0.794977	0.000241305	0.00678601	-1.73505
SEPT10	9.30309	7.95523	8.7521	17.6536	18.4681	15.5801	0.991283	0.000241351	0.00678601	1.98795
LRRIQ1	7.26452	6.87443	9.59985	16.7616	19.2745	16.7077	1.14704	0.000243659	0.0068278	2.21459
TJP3	37.4449	44.1861	40.599	20.6973	18.9837	23.8327	-0.94254	0.000243266	0.0068278	-1.92191
DKK1	13.0825	13.2731	11.5667	6.58551	5.71855	5.88416	-1.06027	0.000246782	0.00690368	-2.08533
SEMA4B	17.1526	19.5557	17.775	8.91031	9.79653	9.95496	-0.924934	0.000253609	0.00705945	-1.8986
SLC26A3	2.20948	1.38352	1.58078	0.664085	0.656227	0.518102	-1.48391	0.00025396	0.00705945	-2.79705
UGT2B17	0.849609	0.846998	0.534343	2.91709	2.22193	2.16909	1.71565	0.00025405	0.00705945	3.28444
PHF10	84.2629	77.3503	80.495	136.046	140.084	135.524	0.766497	0.000260925	0.00723838	1.70113
KAZN	3.23121	3.3467	3.6148	1.51558	1.1444	1.36827	-1.34119	0.000262253	0.00726308	-2.5336
FAM43A	3.19794	3.15615	2.35189	1.10681	0.98434	0.96219	-1.50721	0.000264803	0.00732152	-2.8426
NAP1L3	7.96577	6.05289	6.74721	13.5584	14.3901	13.4336	0.998429	0.000282902	0.00780177	1.99782
REEP2	6.37184	7.32676	6.45478	15.4515	12.2528	13.862	1.04181	0.000283112	0.00780177	2.0588
DACT3	3.80462	4.35538	3.88688	9.73024	9.06143	8.93415	1.19944	0.000286934	0.007894	2.2965
LHFPL6	2.44384	2.68609	2.02489	5.55954	5.73948	4.95671	1.18367	0.00029163	0.00799672	2.27154
RND2	14.6313	12.6246	11.8877	24.9296	23.8977	25.2021	0.922867	0.000291202	0.00799672	1.89588
SDC1	52.3299	58.1943	48.6185	30.2159	29.4365	27.5334	-0.869876	0.000292226	0.00799988	-1.82751
FADS2	140.501	165.136	145.191	86.0316	80.8624	86.4673	-0.83183	0.000296952	0.00811586	-1.77994
PCDHB18P	5.34461	3.67669	4.57378	10.0306	10.6489	8.27536	1.09368	0.000297993	0.00813096	2.13418
PCOLCE	6.79827	7.09053	6.61021	12.9452	13.2652	15.3185	1.01967	0.000299196	0.00815039	2.02746
GSTM4	28.3656	30.1723	30.0329	57.7633	49.5744	51.136	0.837178	0.00030166	0.00820408	1.78655
SLC6A3	1.27917	1.05926	0.94461	3.01605	2.99989	2.64602	1.40525	0.000309258	0.00838327	2.64863
SEMA6B	4.79745	5.63599	4.47935	10.3487	9.10471	12.0642	1.08045	0.000310116	0.00839284	2.11469
EPN3	70.1447	79.5081	70.0099	39.6212	37.9388	43.5547	-0.85743	0.000310846	0.0083989	-1.81181
KIAA0513	7.51722	8.86373	8.55893	15.324	16.8379	15.6573	0.936114	0.000321898	0.0086834	1.91337
SEMA3E	3.76827	3.67844	2.90812	7.2846	8.20261	6.8998	1.11563	0.000330618	0.00888977	2.16689
SLC35D1	16.5736	13.7055	16.2	32.917	29.0113	26.3492	0.924496	0.000333617	0.00895592	1.89802
NPM2	13.7221	16.2131	14.7282	7.36027	7.92159	7.77153	-0.95396	0.000339771	0.00910642	-1.93718
TTLL6	2.20948	2.24822	2.00489	3.92917	5.85922	5.69912	1.26603	0.000342082	0.00915358	2.40499
SPTB	5.38751	7.18729	4.79075	10.6628	13.5337	13.5108	1.11952	0.000347478	0.00928302	2.17275
CACNA1G	0.697731	0.216175	0.658543	2.54602	1.64057	2.11225	2.00511	0.000349768	0.00932921	4.01418
ZBTB4	24.6532	24.1035	23.2297	40.0941	43.0532	41.7072	0.795719	0.000357212	0.00951248	1.73594
MAGED4	2.48223	2.89662	1.43194	6.00312	10.223	6.3625	1.736	0.000357858	0.00951445	3.33111
PAX2	10.1171	11.6302	10.4871	5.86608	3.32801	4.84796	-1.20303	0.000360248	0.0095627	-2.30222
CAPRIN2	20.9008	16.302	19.41	32.4455	42.2081	36.8133	0.980784	0.000369055	0.00978084	1.97354
MRPS11	36.8616	40.0052	36.4666	22.9668	16.9381	21.1823	-0.893125	0.000373123	0.0098729	-1.85719
EPHX4	8.54349	7.99858	6.67018	4.26123	3.20408	3.18267	-1.1271	0.000374339	0.00988932	-2.18419
CYP46A1	2.26748	2.14682	3.31873	5.1976	7.14598	6.80518	1.301	0.000384111	0.0101314	2.464
HAPLN3	1.51175	2.16175	1.77355	0.664085	0.656227	0.666131	-1.45419	0.000386063	0.0101667	-2.74002
NDST4	1.35442	1.01261	2.21073	0.129499	0.33313	0.481095	-2.20293	0.000390137	0.0102578	-4.60413
SLC22A3	0.40701	0.734994	0.462666	1.32817	1.59369	1.36927	1.39566	0.000391911	0.0102719	2.63109
ZNF813	10.9895	10.9605	9.65079	18.8724	19.4173	20.2816	0.892347	0.000391496	0.0102719	1.85619
SIRT6	19.4783	24.6872	23.1719	11.2341	10.4996	12.3974	-0.980353	0.00039401	0.0103106	-1.97295
MOXD1	4.94226	3.4588	4.164	9.68457	9.1403	9.47387	1.17618	0.000396955	0.0103602	2.25978
GBP1	3.06352	2.80282	3.16	6.98032	7.14877	5.68754	1.1309	0.000400256	0.0104248	2.18996
AUTS2	14.8849	14.3108	14.7668	26.2867	28.6865	28.8657	0.93201	0.000405932	0.0105561	1.90793
IGFBP1	2.09319	1.94557	1.23378	4.9253	4.68733	4.62591	1.4432	0.00040801	0.0105936	2.71922
PTPRN2	4.24453	3.67497	3.20011	1.71555	0.796847	1.0362	-1.6581	0.000416357	0.0107934	-3.15601
GNA14	0.755876	0.951169	1.11811	0.166021	0.28124	0.259051	-1.9675	0.000418218	0.0108248	-3.91091
HLA-DMB	1.26992	0.158925	0.269093	6.16468	4.21824	2.4138	3.01166	0.000423988	0.0109571	8.0649
KLC3	3.78784	4.72457	5.04297	9.59283	9.4761	9.23861	1.0553	0.000458993	0.0118433	2.07815
WWC2	14.9871	13.4893	12.6632	25.6226	26.7178	24.7238	0.908082	0.000466702	0.0120235	1.87655
HEBP2	179.485	189.54	172.587	112.215	99.4264	108.098	-0.760553	0.00046914	0.0120677	-1.69414
CALCB	3.19794	2.66684	2.77532	1.27283	1.16609	1.33092	-1.18649	0.000472098	0.012125	-2.27598
PRKX	50.7228	51.4109	54.1364	29.5196	32.5732	29.3226	-0.774603	0.000474745	0.0121741	-1.71072
MGAT4C	8.25052	6.70936	6.59261	13.3336	14.6754	13.6387	0.954346	0.000480206	0.0122763	1.9377
MGAT4C	8.25052	6.70936	6.59261	13.3336	14.6754	13.6387	0.954346	0.000480206	0.0122763	1.9377
STAP2	18.9537	22.5449	22.8718	12.9116	10.7392	10.7234	-0.911594	0.000487651	0.0124475	-1.88112
GAREM1	6.45402	5.25591	4.89958	2.56612	3.00899	2.40547	-1.0524	0.000498021	0.0126927	-2.07398
ITGA5	16.3967	17.5102	17.0415	30.7139	29.2958	31.1971	0.839142	0.000500158	0.0127276	1.78899
TPBGL	2.73278	2.85351	2.07032	0.553404	1.03121	1.10511	-1.47489	0.000515064	0.0130869	-2.77962
CCDC80	3.05201	4.17009	4.26072	8.86325	10.2296	10.4325	1.35508	0.000520713	0.0132102	2.55812
BCL6B	7.6169	9.98728	8.59788	5.03598	3.28113	4.25584	-1.06488	0.000538949	0.013652	-2.09199
RIPOR2	5.86154	5.34603	4.67336	12.23	10.9044	9.59902	1.04442	0.000543237	0.0137397	2.06254
NPPC	1.39546	2.03204	1.041	0.442723	0.374987	0.555109	-1.67343	0.000547156	0.0138178	-3.18972
MNX1-AS1	4.12824	4.3235	3.73988	1.32817	1.26558	2.36847	-1.26914	0.000553684	0.0139614	-2.41018
TLNRD1	45.2363	51.1902	41.7171	25.4012	21.843	25.609	-0.922281	0.000559827	0.0140809	-1.89511
HOXA11	2.04809	3.73207	2.368	0.940787	1.19413	0.80254	-1.4804	0.000564328	0.0141653	-2.79025
DMBX1	2.91631	3.58969	3.22962	6.24992	7.07749	7.59682	1.10143	0.000568301	0.0142221	2.14567
TWSG1	24.4704	20.0713	22.4753	45.0153	37.0879	41.7913	0.88805	0.000581319	0.014526	1.85067
WLS	13.4297	14.1229	13.8944	24.6193	24.7452	24.9382	0.841261	0.000584441	0.0145821	1.79162
AKTIP	35.2102	37.2699	36.9495	62.7427	63.4111	59.275	0.759241	0.00059976	0.0149418	1.6926
MAN1C1	9.51892	11.3807	10.9048	19.4036	18.3981	19.9936	0.858232	0.000604503	0.0150375	1.81282
SLCO2B1	1.34434	1.65135	1.47346	2.71914	3.66607	4.71038	1.31298	0.000616123	0.0153036	2.48454
GALNT6	2.72692	1.85911	1.96406	4.26748	5.24818	6.19915	1.27612	0.000622299	0.0154339	2.42187
SECTM1	5.1167	9.20905	5.9761	3.20974	2.43741	2.88657	-1.25558	0.000625023	0.0154784	-2.38763
PRKACB	18.6062	16.2996	12.9161	30.8799	34.1707	27.3484	0.955186	0.000628291	0.0155362	1.93883
YPEL5	12.501	10.4629	13.4559	21.4721	23.8585	22.7225	0.901946	0.000631242	0.015586	1.86858
PCDHB15	4.25575	3.80943	3.96108	8.0546	8.29003	7.88427	1.01148	0.000634858	0.015652	2.01598
UGT2B4	0.882696	1.53753	1.15012	3.56608	3.18283	3.5467	1.51058	0.000640041	0.0157564	2.84924
GJB1	1.51175	1.8591	1.42655	0.830106	0.374987	0.592117	-1.42943	0.000656499	0.0161376	-2.6934
TMSB15A	4.98068	3.45954	3.23511	9.74393	8.63447	8.96123	1.23624	0.000659082	0.0161772	2.35584
FAM13C	0.555571	0.51882	0.584198	0.154169	0.0468733	0.185036	-2.03007	0.000663575	0.0162635	-4.08424
YPEL2	4.94226	3.84791	3.89411	8.02436	10.5934	7.77153	1.06217	0.000696289	0.0170151	2.08806
EDN2	12.6755	12.322	12.1835	7.41561	6.89038	5.40306	-0.923507	0.000697768	0.0170261	-1.89672
GIPC3	6.74474	8.34435	7.55848	13.7798	14.5776	16.1352	0.972441	0.00071521	0.0174007	1.96216
MEX3B	6.5703	8.81993	7.51832	3.76315	4.17173	3.51569	-1.0045	0.000715019	0.0174007	-2.00625
CCDC88C	29.7969	28.8379	27.6281	16.2707	15.6559	17.1355	-0.81187	0.000766479	0.0186207	-1.75548
LINC00937	1.56909	1.54735	2.00493	3.29767	4.57784	4.06773	1.2154	0.000776742	0.0188425	2.32205
APLP2	321.393	339.182	316.626	538.749	536.179	547.598	0.731513	0.000779922	0.0188921	1.66038
C9orf72	16.513	13.2731	14.4583	28.1683	26.2491	24.9799	0.845557	0.000785555	0.0190008	1.79696
KIAA0408	2.23891	1.87398	2.23395	1.01245	0.441473	0.960392	-1.38658	0.000788186	0.0190367	-2.61457
CYB5R2	1.63037	1.82813	2.05576	4.38767	4.29588	4.07705	1.20052	0.000791904	0.0190988	2.29823
ATL1	5.18586	4.74584	3.91985	2.0696	1.87258	2.43778	-1.10605	0.000804945	0.0193852	-2.15256
PCDHGB7	0.969679	0.777772	1.04471	2.44039	1.87069	3.57471	1.50214	0.000809798	0.0194738	2.83263
DMRT1	4.70994	6.09618	4.97379	2.60102	1.59382	2.62758	-1.20837	0.00081116	0.0194784	-2.31077
LOC105371485	1.07877	1.29705	0.77111	0.442723	0.14062	0.361791	-1.72055	0.000821853	0.0196783	-3.29563
STXBP5L	9.94267	6.44201	9.13766	3.81849	4.31235	3.70073	-1.10618	0.000821769	0.0196783	-2.15276
LOC643201	1.50167	1.22172	1.59473	0.657558	0.516377	0.44829	-1.42365	0.000828209	0.0198019	-2.68263
KCNK4-TEX40	3.07367	2.70982	2.96193	1.52312	0.759705	1.31133	-1.28209	0.00084108	0.0200808	-2.43191
IFIT2	0.930309	1.08087	1.12571	3.26559	2.10381	2.81396	1.36836	0.000849066	0.0202424	2.58177
AFAP1L1	3.48866	2.46439	2.53841	6.86221	5.24981	6.25423	1.1202	0.000857206	0.0204072	2.17377
RPRML	3.28373	4.29657	3.84648	2.0199	1.27808	1.26809	-1.34078	0.0008797	0.0209127	-2.53289
ADAMTSL5	2.84907	2.93998	2.62177	6.1851	5.32777	6.08503	1.0649	0.000890708	0.0211441	2.09202
CCNO	6.86103	8.64699	8.7521	4.09519	4.03111	4.14482	-0.9857	0.000895818	0.0212048	-1.98027
SEMA7A	1.91876	2.68057	1.65789	0.719425	0.890593	0.81416	-1.35809	0.000895384	0.0212048	-2.56346
ENOX1	5.64476	6.48472	5.08615	2.93304	2.76685	3.02707	-0.977179	0.000907251	0.0214449	-1.96861
TTYH2	29.5042	29.9536	30.6331	18.0367	16.0294	17.4723	-0.806506	0.000915796	0.0216162	-1.74897
KLF15	50.8763	50.974	45.4955	25.7886	27.9834	29.0877	-0.826957	0.000930765	0.0219383	-1.77394
NUCB2	58.7476	65.9368	69.9817	116.256	119.277	106.837	0.81135	0.000940544	0.0221374	1.75485
MAPK4	0.465154	1.16734	0.886777	3.32042	2.39054	2.59051	1.68003	0.000942877	0.0221609	3.20435
CEACAM19	1.54811	2.01207	1.86478	0.574288	0.692172	0.816418	-1.36422	0.000970189	0.0227386	-2.57437
ITGB4	3.32066	3.00918	3.47836	6.65731	6.37624	7.21681	1.04551	0.000969681	0.0227386	2.0641
SLC7A2	30.5258	28.055	29.6106	47.8695	53.6231	51.7732	0.798825	0.000998342	0.0233654	1.73968
GDAP1	9.49493	9.3829	9.49679	5.90016	3.52698	4.37894	-1.04488	0.00101661	0.0237261	-2.06319
REEP1	2.67464	2.16175	2.85311	5.36802	4.68733	5.77314	1.0415	0.00101568	0.0237261	2.05836
HSPB8	6.62845	8.51729	7.51832	3.70781	2.8124	3.66372	-1.15478	0.00102315	0.0238452	-2.2265
ST8SIA6	1.39546	0.921225	1.50362	0.520509	0.399128	0.185036	-1.83265	0.00103744	0.0241444	-3.56192
RAB3B	20.5911	17.3435	21.3055	31.8257	38.1847	37.0533	0.855412	0.00105693	0.0245638	1.80928
KCNAB2	11.1637	12.4949	10.757	6.19813	5.6248	5.99518	-0.949861	0.00107251	0.0248562	-1.93169
RBM15-AS1	2.92456	2.49779	2.80248	1.34472	0.772768	1.3212	-1.25126	0.00107251	0.0248562	-2.38049
GPRC5A	7.83895	7.64796	7.53872	12.7284	15.5975	14.3949	0.892836	0.00108061	0.025009	1.85682
ADRA2A	5.23299	6.35554	5.08933	11.1788	10.2653	11.1762	0.966365	0.00109899	0.0253991	1.95391
DRAM1	7.23237	8.78073	8.32364	4.269	4.34997	4.26339	-0.919663	0.0011108	0.0256363	-1.89167
AMOTL2	3.31422	3.97762	3.47	7.32682	8.29658	8.58569	1.16796	0.00111956	0.0257694	2.24694
SELENOS	35.7006	41.0732	42.0255	23.9624	22.2648	22.5004	-0.793197	0.00111967	0.0257694	-1.73291
EBF4	5.40742	7.78229	6.78577	15.274	13.1245	15.358	1.12566	0.00112507	0.0258233	2.18202
NDST3	2.60974	2.55256	2.65661	1.17852	1.14959	1.14198	-1.16962	0.00112512	0.0258233	-2.24953
ANKRD13B	65.8775	74.0183	70.3638	43.3315	38.8111	40.819	-0.775872	0.00112898	0.0258762	-1.71222
TGFB1I1	3.37237	3.11539	3.24934	8.68862	7.04811	7.32744	1.2423	0.00114081	0.0261114	2.36575
ZBTB16	32.0252	34.6662	32.5172	18.8974	15.8519	19.9937	-0.856628	0.00114269	0.0261184	-1.8108
LINC00668	1.58063	1.92262	1.70417	0.510306	0.683246	0.822506	-1.34334	0.00115292	0.0263161	-2.53738
USP43	34.247	33.2477	32.3866	17.7081	19.8377	18.6517	-0.827972	0.00115829	0.0264024	-1.77519
IFIT1	1.02533	0.963512	1.1979	1.98113	3.11456	3.47259	1.4274	0.00116172	0.0264444	2.68961
AQP3	50.0041	57.9348	51.5873	32.5402	24.9835	29.7909	-0.871886	0.00117504	0.0267109	-1.83005
HDAC11	2.67464	3.80468	3.39288	6.30881	7.45286	8.1046	1.14228	0.00118767	0.0269611	2.2073
CYP4F29P	2.4444	2.96015	3.6007	7.48909	6.33656	6.44745	1.15956	0.00121016	0.0274342	2.23389
ZNF736	83.7178	75.34	79.1886	126.639	149.365	134.857	0.78752	0.00121552	0.0274806	1.7261
FYB2	2.15134	1.81587	1.735	4.42723	3.93736	4.25584	1.15033	0.00124395	0.0280852	2.21965
PTGDS	2.75879	2.37566	2.97317	5.46116	5.08581	6.38351	1.06243	0.001325	0.0298341	2.08845
TNNI3	4.65154	6.13936	6.30155	12.2856	12.1094	10.9172	1.03963	0.0013328	0.029969	2.0557
ARHGEF25	18.1416	18.4037	17.2839	29.7148	30.6623	33.3805	0.802089	0.00134432	0.0301872	1.74362
PRSS21	13.1697	13.2515	13.7065	7.63698	7.19506	7.36445	-0.854926	0.00137118	0.0307074	-1.80867
PRSS21	13.1697	13.2515	13.7065	7.63698	7.19506	7.36445	-0.854926	0.00137118	0.0307074	-1.80867
NATD1	6.87224	8.16506	7.57858	13.5516	12.6467	15.5126	0.881725	0.00138137	0.0308939	1.84258
SYNPO2	3.62652	3.65735	3.26683	1.3512	1.50904	1.56758	-1.24388	0.00139771	0.0312175	-2.36835
NAPB	20.7892	18.7695	19.1282	10.3184	11.7401	10.9322	-0.828629	0.00142293	0.031738	-1.776
GRIP1	2.79093	2.81027	3.00733	1.16215	1.45307	1.07321	-1.22407	0.00143855	0.0320435	-2.33605
BNIP3	36.3562	35.8121	31.8753	20.7194	19.9981	18.3892	-0.816541	0.00144533	0.0321513	-1.76118
SYNM	32.3646	25.1724	25.9093	16.3405	14.8282	14.5575	-0.866067	0.00145981	0.03243	-1.82269
ACOT2	16.6337	18.2094	16.3199	32.3346	28.3819	31.8797	0.855327	0.00147596	0.032745	1.80917
ADD3	125.967	104.431	116.014	201.825	203.734	184.034	0.767916	0.0015435	0.0341977	1.70281
LTBP1	19.1295	16.9049	15.8463	28.9984	30.702	30.0869	0.795248	0.00155053	0.0343078	1.73538
ITPR2	30.1187	24.7736	27.413	42.2801	55.873	50.774	0.859637	0.00158867	0.0351049	1.81458
TMEM121B	6.80288	9.6414	8.21232	3.43111	3.46863	4.92197	-1.05393	0.00159723	0.0352472	-2.07618
RSPH3	30.1368	28.5049	32.4014	50.6145	55.5239	51.4737	0.79105	0.00160453	0.0353613	1.73033
ABCC11	5.1332	5.24681	3.54219	9.01139	9.00405	9.28759	0.977092	0.00162624	0.0357924	1.96849
CROCC2	5.85442	6.60442	6.50142	3.47459	2.68607	3.37323	-0.992779	0.00163726	0.0359872	-1.99001
CLSTN2	1.07642	0.736746	0.803187	0.232389	0.394226	0.297277	-1.4586	0.00164599	0.0360837	-2.74842
DNAH2	5.43092	5.54264	4.95868	9.29972	10.489	9.61395	0.885115	0.00164515	0.0360837	1.84691
ITGA1	10.3901	8.22254	9.81077	17.3211	17.9866	16.2613	0.860788	0.0016759	0.036691	1.81603
ABTB1	9.88453	12.7975	11.3739	21.3614	24.1398	21.0201	0.962387	0.00169988	0.0371181	1.94853
PPP2R5B	8.72164	9.51169	8.94488	16.6575	15.7026	16.9493	0.858372	0.00173241	0.0377789	1.81299
ZSCAN18	20.99	19.9074	21.5568	35.3212	34.6504	38.9327	0.803017	0.0017363	0.0377968	1.74475
APBA3	13.0719	13.5282	12.4577	7.19686	6.85915	7.72468	-0.840239	0.00175165	0.0380485	-1.79035
EMID1	6.62845	7.34994	5.20499	12.3409	11.9996	13.4336	0.980576	0.00176883	0.0383715	1.97325
HIST1H2AG	2.44344	2.45364	3.32848	6.3371	5.64378	5.11873	1.04455	0.00177712	0.0385011	2.06272
ENHO	15.2919	16.2131	14.0322	8.79913	6.83903	7.7559	-0.962306	0.00183988	0.0397572	-1.94842
GADD45G	5.81443	6.91759	5.89899	10.736	11.484	12.8415	0.912174	0.00183779	0.0397572	1.88188
PVT1	17.2295	19.2845	20.5188	8.43651	11.3136	10.7208	-0.901982	0.00184464	0.0398083	-1.86863
C2orf72	17.327	15.9105	15.1523	28.3343	26.6709	27.9775	0.780649	0.00185203	0.0399158	1.7179
FAM111A	31.5949	26.2402	31.8708	53.0658	58.1857	54.2515	0.884616	0.00186552	0.0401345	1.84627
SH2D2A	4.01196	4.40997	4.164	1.93691	2.29679	2.0354	-1.00379	0.001867	0.0401345	-2.00526
SLC19A2	32.6189	29.6592	30.0733	51.6326	52.4981	50.774	0.747635	0.00187743	0.0403064	1.67904
ANXA6	115.3	127.197	116.245	71.8872	67.2164	75.1988	-0.74293	0.00191227	0.0410016	-1.67357
DNAH10	0.55789	1.20546	0.245863	2.16503	2.28994	2.1372	1.71137	0.00192752	0.0412751	3.27471
LOC101927359	0.893169	0.679786	0.682282	1.81329	2.04599	2.72734	1.56421	0.00193581	0.0413994	2.95716
HFM1	2.09319	1.8591	2.00506	3.92917	5.01545	4.10781	1.13192	0.00193847	0.0414029	2.19151
DAPK3	32.0375	38.3062	33.0421	17.1002	16.9213	21.9453	-0.881038	0.0019615	0.0418412	-1.8417
HOXB-AS3	2.02048	2.74178	1.77948	3.89281	5.86737	4.67399	1.14162	0.00198007	0.0421148	2.20629
SYNE1	11.5249	12.9737	13.3863	19.6439	25.0565	23.7951	0.852871	0.00198193	0.0421148	1.80609
VIM-AS1	3.5468	4.39397	4.27431	1.67077	1.65743	2.09757	-1.16498	0.00197824	0.0421148	-2.2423
PDIA5	39.2992	39.7001	36.1691	24.3251	21.3348	22.0304	-0.767629	0.0019952	0.0423425	-1.70247
ARMT1	25.5835	21.6175	22.555	40.0665	40.8735	38.7096	0.780958	0.00200039	0.0423447	1.71827
BOC	3.36896	2.80478	2.52616	1.5361	1.29953	1.30063	-1.06879	0.00199929	0.0423447	-2.09767
EIF4EBP1	44.1897	55.2975	49.2354	29.6071	25.0304	29.0877	-0.830783	0.00202497	0.0428104	-1.77865
SYT5	5.96852	5.68774	7.37463	12.6149	11.081	15.7228	1.04921	0.00202928	0.0428469	2.0694
ARL1	266.886	239.373	247.672	159.085	152.986	142.555	-0.73001	0.0020448	0.0431199	-1.65865
TMEM45B	5.06048	6.06679	6.91554	11.6672	11.3846	11.5971	0.934819	0.00205763	0.0433354	1.91165
TMEM178B	6.75814	6.90818	5.99711	3.201	3.34671	3.3441	-0.987919	0.00211536	0.0444949	-1.98332
IFI6	1.39546	2.03204	1.19522	4.1772	3.56237	3.93878	1.33262	0.00211961	0.0445279	2.51859
