# Supplementary material for: MEIS-mediated suppression of human prostate cancer growth and metastasis through HOXB13-dependent regulation of proteoglycans
Source: eLife. 2020 Jun 18;9:e53600. doi: 10.7554/eLife.53600 (PMC7371429; doi:10.7554/eLife.53600)
Supplement: Supplementary file 5. — Overlap of DEGs between LV-MEIS1 and control cells with ChIP-seq targets from both HOXB13ko and HOXB13ko-LV-MEIS1 cells identified 157 DEGs that are targets of MEIS1 only when HOXB13 is present. [file elife-53600-supp5.xlsx]

## Sheet: 157 key genes
SYMBOL	Control_1	Control_2	Control_3	LV-MEIS1_1	LV-MEIS1_2	LV-MEIS1_3	log2(fold change)	PValue	FDR	non-Log fold change
DCN	2.461	2.99288	1.82515	28.2728	28.1538	26.4786	3.51211	6.51e-12	0	11.4091
MEIS1	4.24453	4.4532	4.04833	49.585	46.7796	45.815	3.47854	1.26e-16	0	11.1467
ARSJ	4.13566	2.9908	3.75195	28.0576	30.6651	30.9531	3.04759	4.02e-11	0	8.26827
HMGCS2	0.930309	1.42675	1.42655	9.35253	9.74965	8.73372	2.85452	1.32e-09	0	7.23262
SLITRK6	96.3451	89.4099	97.0057	631.766	662.742	597.335	2.74218	2.11e-16	0	6.69079
FLRT3	3.89567	3.15615	3.85555	21.9701	20.0149	19.0958	2.48488	1.71e-09	0	5.59787
PCDH10	1.80322	1.6441	1.38829	9.07847	7.64304	8.21892	2.37037	1.07e-07	0	5.17072
CTTNBP2	0.523299	1.08087	1.50366	5.03598	4.82795	6.29124	2.33677	7.3e-06	0	5.0517
EGLN3	2.67464	3.4588	2.19766	13.1157	13.2652	14.2108	2.28496	3.21e-09	0	4.8735
GPRIN3	3.17109	2.12592	2.55871	9.69039	12.8548	12.8008	2.17939	6.59e-08	0	4.52962
SOX2	1.10474	1.81587	1.27233	5.53404	5.67167	6.99385	2.10673	1.74e-07	0	4.30715
ANKRD30B	3.34307	2.51336	2.35033	10.1756	11.8418	10.501	1.99521	2.31e-07	0	3.98674
F5	0.639587	0.389115	0.501222	2.3243	2.01555	1.5173	1.93622	4.25e-05	0	3.82701
LOC100128317	15.2338	14.5269	17.5042	56.6132	66.232	53.5495	1.89657	2.37e-10	0	3.72327
SDK1	6.33773	9.42522	7.66502	26.0074	28.8271	30.0129	1.85163	1.15e-08	0	3.60907
PART1	12.0066	13.1789	12.2583	43.7044	47.6102	42.8509	1.83964	2.37e-10	0	3.57921
TTC39B	3.29934	3.00968	3.38129	11.7717	12.4014	10.0646	1.81792	2.16e-08	0	3.52574
ZNF385B	40.4684	39.56	38.5555	140.952	139.12	135.632	1.81018	5.36e-13	0	3.50686
LOC100653233	0.988453	1.46999	1.11811	4.59325	3.74987	4.29285	1.80728	2.22e-05	0	3.49981
ANKRD30A	20.5249	16.4293	22.7312	63.8505	71.7974	64.6803	1.74622	6.33e-08	0	3.35479
UGT2B15	8.40314	4.71512	7.10781	24.1436	23.7609	19.3551	1.73964	7.13e-05	0	3.33952
SPINK1	7.15175	9.76693	8.49911	33.268	26.4763	25.4121	1.73637	3.15e-08	0	3.33196
ANKRD29	1.53326	0.844406	1.51735	4.69632	3.95533	4.28943	1.73316	5.38e-05	0	3.32455
LITAF	4.36082	6.65818	6.55444	20.1439	18.3377	19.7989	1.71899	1.12e-07	0	3.29206
SLC2A12	20.835	16.0935	18.7786	54.1647	59.906	64.267	1.68437	8.83e-10	0	3.21399
KCNJ8	20.1761	21.704	18.4295	63.6968	59.2479	62.3573	1.62007	2.66e-11	0	3.0739
ZNF558	4.67652	4.38706	4.41159	12.9604	14.7666	12.6239	1.58238	5.78e-08	0	2.99463
UGT2B10	1.2555	1.66586	1.21859	4.19715	4.33827	3.62841	1.5467	1.53e-05	0	2.92148
LAMA3	2.55835	2.55086	2.54466	6.36415	8.4372	7.43847	1.53839	0.000113046	0	2.90471
LUM	16.3967	14.3972	14.7282	49.6403	41.8579	40.1899	1.5331	1.66e-08	0	2.89408
TARP	19.2023	22.4465	23.8035	65.3352	56.827	62.953	1.49612	8.04e-06	0	2.82083
JAK3	2.95117	3.96667	4.25016	9.77972	10.4804	11.087	1.48041	1.95e-06	0	2.79029
DSCAM	3.19794	3.19939	2.46755	7.47096	9.46841	7.54949	1.4706	1.63e-06	0	2.77138
RHOD	2.73278	3.93438	3.39288	8.41174	8.90593	10.4731	1.46045	9.65e-05	0	2.75194
ADGRG6	36.3402	27.4974	31.6541	84.1174	88.9656	88.3734	1.45767	2.53e-09	0	2.74664
KCNJ3	15.3264	11.5213	19.1472	40.8025	41.5983	41.9653	1.43243	2.82e-06	0	2.69901
TOX3	27.6365	26.9364	27.3766	71.517	70.6425	74.2773	1.40161	3.11e-11	0	2.64196
CDH2	6.27958	5.53599	6.05322	14.286	15.8901	15.9871	1.37163	1.88e-07	0	2.58763
POTEI	23.3844	21.5061	22.1308	47.4439	64.7389	59.3222	1.35842	1.66e-07	0	2.56404
STXBP6	11.4399	9.92687	9.49205	27.2905	25.2585	25.9053	1.34886	7.71e-07	0	2.54711
PLEKHF2	33.4911	30.6968	33.0035	85.833	79.8722	78.2334	1.3275	1.44e-09	0	2.50967
BMF	7.67505	7.3116	6.40164	16.4836	18.2862	18.5275	1.32036	3.36e-06	0	2.49729
VAV3	12.9663	11.027	11.803	29.5518	29.4365	29.8279	1.31368	1.92e-08	0	2.48575
FIRRE	9.00227	8.07844	9.17627	18.6537	23.8731	22.2423	1.30369	6.57e-07	0	2.4686
FZD8	32.9678	41.4623	33.312	92.0311	77.6691	94.8355	1.29448	3.98e-06	0	2.45288
KRAS	266.865	222.357	234.691	588.947	613.008	562.545	1.28601	1.46e-09	0	2.43852
IGSF3	8.89608	8.67046	6.9638	19.0298	20.5305	20.0185	1.2837	8.04e-07	0	2.43463
EDN1	3.60495	2.98321	2.96877	8.46708	7.40599	7.29044	1.28004	2.35e-05	0	2.42845
MAOA	44.4804	42.9756	40.6375	104.317	101.903	103.694	1.27574	1.33e-09	0	2.42122
PBX1	31.7793	27.5145	27.0845	63.1869	69.1085	68.1195	1.21788	3.81e-08	0	2.32605
MCCC2	326.104	329.797	330.244	751.487	743.521	733.844	1.17636	8.47e-11	0	2.26006
ARHGAP29	24.49	18.7818	19.6764	45.8481	48.1369	47.3431	1.17139	9.76e-06	0	2.25228
LIX1L	10.0133	10.7513	11.1799	23.7257	23.0483	24.8465	1.16248	2.18e-06	0	2.23842
ETV1	16.0478	13.5325	13.5715	31.1567	31.7801	32.1593	1.14463	2.95e-07	0	2.21089
AMBP	5.98886	7.65259	7.44121	16.7128	13.9683	15.9501	1.13962	5.8e-05	0	2.20323
CEP126	10.6845	8.42359	10.3051	21.4928	22.5393	20.672	1.13838	2.13e-05	0	2.20134
FAM198B	5.98107	5.50028	4.54063	12.6409	10.6181	11.0294	1.10165	7.2e-05	0	2.14601
NR3C2	10.466	7.73906	10.063	17.7089	20.343	21.7233	1.08461	5.46e-05	0	2.1208
SLC22A23	28.4326	32.3379	30.3342	63.1909	61.7565	63.3467	1.04543	3.81e-07	0	2.06398
ETV5	9.7101	9.46879	8.48236	21.2507	16.7883	18.955	1.04382	0.0001	0	2.06168
LGR4	20.5831	14.5269	16.6174	33.1489	36.0925	35.638	1.02587	4.62e-05	0	2.03618
PRRT2	41.922	39.7324	45.3908	81.2457	86.1784	89.7787	1.01746	0.000132088	0	2.02435
NPNT	51.3105	44.1993	46.3607	90.4816	100.637	92.324	1.00069	2.73e-06	0	2.00096
TMBIM1	38.1758	40.2531	35.2144	79.0565	71.0268	76.0644	0.993211	4.68e-06	0	1.99061
HGF	40.0614	31.1724	41.293	68.5668	82.9658	71.3501	0.986922	0.000152394	0	1.98195
DOK6	75.6623	61.0564	68.6956	130.22	139.106	133.915	0.975279	6.72e-06	0	1.96602
TMEM62	14.1984	17.2569	14.6896	30.3265	29.0615	29.3178	0.940689	0.000120413	0	1.91944
PTK7	11.0049	12.9179	12.5101	22.8323	23.2389	23.5619	0.93172	0.00013246	0	1.90755
WDR44	30.2932	27.1083	28.7624	54.787	56.0605	52.5133	0.923712	7.03e-06	0	1.89699
REPS1	102.178	105.584	103.626	192.089	193.19	194.432	0.896427	3.23e-07	0	1.86145
CAMK2D	102.16	93.6469	97.1984	181.351	186.415	176.784	0.894685	1.45e-06	0	1.8592
LOC101927480	25.6182	28.5234	25.1449	50.4773	49.2512	47.5635	0.892465	4.25e-05	0	1.85635
SIPA1L2	21.8041	21.4013	21.7453	37.4101	41.436	40.1529	0.874111	3.73e-05	0	1.83288
SATB2	23.1327	20.2682	20.9368	37.2456	38.8831	39.824	0.852433	0.000141965	0	1.80554
SORBS1	25.1765	24.471	22.2483	43.7746	43.4095	41.9663	0.846291	0.000149951	0	1.79787
DLG5	29.9577	28.0665	26.574	49.4374	49.3109	52.7282	0.842813	0.000128883	0	1.79354
FKBP5	423.041	411.968	408.648	248.276	233.974	222.543	-0.819602	3.93e-05	0	-1.76492
STK39	52.5624	49.9364	47.3847	28.7217	26.7178	27.0523	-0.861192	2.81e-05	0	-1.81654
BAHCC1	150.613	152.057	148.975	77.0283	85.9657	81.8971	-0.882326	5.84e-06	0	-1.84334
TMEM184A	124.553	129.761	123.184	67.0814	61.6289	69.1595	-0.931388	2.95e-06	0	-1.90711
CD44	41.5477	43.7331	44.0342	21.5783	22.1594	23.6764	-0.938232	1.17e-06	0	-1.91618
MBOAT2	75.8579	66.1548	67.2213	36.112	37.551	34.4987	-0.95101	1.34e-05	0	-1.93323
KDM4B	181.057	201.348	171.106	92.0633	92.5393	98.9429	-0.964204	3.01e-06	0	-1.95099
NELL2	29.7699	32.2533	22.902	13.7244	14.5307	13.6187	-1.0181	0.00010574	0	-2.02525
EPHB3	24.8858	23.2338	22.4418	11.1306	10.502	12.9311	-1.0229	2.22e-05	0	-2.032
COLEC12	112.153	118.343	115.677	58.7682	54.2006	57.3707	-1.02368	4.51e-08	0	-2.0331
EFNA5	30.1484	30.7513	30.7402	14.2816	15.3018	13.4214	-1.09286	3.95e-07	0	-2.13296
DSEL	108.446	87.546	92.7223	44.1729	46.3748	42.0643	-1.12125	1.71e-06	0	-2.17536
P2RX7	15.6855	16.4296	17.2962	8.66833	7.37596	6.63636	-1.13047	1.13e-05	0	-2.18931
MAP1B	171.077	141.1	173.829	64.4719	84.2106	72.8068	-1.13214	1.66e-05	0	-2.19183
ARID5A	9.47752	13.2731	10.9112	5.97676	4.68733	4.5889	-1.1494	0.000149358	0	-2.21821
PM20D2	26.4176	22.1539	28.2321	9.55392	13.4214	10.7984	-1.18308	1.31e-05	0	-2.2706
DPYSL4	9.1868	10.3332	9.67743	4.26121	3.5155	4.5889	-1.23694	4.61e-06	0	-2.35698
BMPR1B	14.4443	11.5866	12.7178	5.40012	6.25711	4.58436	-1.25554	8.56e-06	0	-2.38756
LINC00511	7.28429	6.96969	7.73571	2.67793	2.88905	3.21384	-1.31809	2.48e-05	0	-2.49335
AZGP1P1	9.50428	7.11231	8.64465	3.53186	2.67237	3.6763	-1.34796	1.52e-05	0	-2.54552
ARRB1	37.2666	33.3366	32.7271	14.2312	11.8795	13.8498	-1.36881	5.66e-09	0	-2.58257
KLK2	281.904	285.081	294.596	111.709	109.329	105.524	-1.40025	2.52e-10	0	-2.63948
SOSTDC1	19.2458	16.4293	16.309	6.86221	6.04666	6.51328	-1.41776	3.76e-08	0	-2.6717
SPATA13	310.272	267.486	280.208	104.46	107.754	107.785	-1.42206	2.63e-11	0	-2.67968
MESP1	6.86103	8.30111	8.4051	2.82236	2.57803	3.10861	-1.46779	1.35e-06	0	-2.76597
SH2B2	13.3732	16.1266	15.1523	5.03598	4.87483	5.95817	-1.48846	1.18e-07	0	-2.80588
LUZP2	14.626	13.661	14.1222	5.65832	4.6848	3.99794	-1.57224	4.42e-08	0	-2.97366
RAB39A	6.33773	4.88555	6.40021	2.21362	1.64057	1.92438	-1.60896	1.53e-05	0	-3.05033
KLKP1	12.1522	11.9761	13.9753	3.81849	3.28113	4.92197	-1.65578	1.42e-07	0	-3.15093
PTCH1	116.484	113.546	110.663	32.3015	37.4713	36.9889	-1.67054	2.66e-12	0	-3.18333
CNTD2	6.33773	8.99287	7.98099	2.65634	1.96868	2.59051	-1.69399	1.15e-06	0	-3.2355
AK5	16.2804	16.9553	16.8488	4.59325	5.44893	4.69993	-1.76348	1.13e-08	0	-3.39517
SCNN1A	66.71	73.3962	73.6171	19.4833	20.9965	21.3923	-1.78672	1.11e-12	0	-3.45028
HIVEP3	4.18639	3.71886	3.73988	1.10681	1.07809	1.14723	-1.79513	1.28e-07	0	-3.47047
RELN	3.5468	2.76704	1.81211	0.387383	0.937467	0.81416	-1.86895	9.11e-05	0	-3.65268
PLPP1	173.228	186.29	170.285	52.0223	45.7647	46.7827	-1.8755	7.49e-13	0	-3.66928
CNTN3	4.47711	4.58291	3.817	1.21749	1.07809	1.14723	-1.89828	1.71e-07	0	-3.72769
LOC102725072	3.26998	4.03059	3.63063	0.688565	0.697041	1.28926	-1.9953	6.3e-06	0	-3.98699
ACOXL	2.22197	2.29833	2.2687	0.508168	0.813895	0.372311	-2.01028	3.66e-05	0	-4.0286
COL26A1	2.20948	2.07528	1.34944	0.332042	0.28124	0.666131	-2.06464	9.73e-05	0	-4.18329
SLC45A3	150.536	177.869	150.444	23.5197	20.9524	23.0185	-2.8273	9.02e-15	0	-7.09746
PDZRN3	4.30268	5.70701	4.81944	0.664085	0.609353	0.740146	-2.8664	3.35e-10	0	-7.29245
EPHA4	14.3822	11.5655	12.5526	1.55023	0.98434	1.22202	-3.36045	2.1e-10	0	-10.2706
MFAP2	14.8849	19.6719	16.0391	1.93691	1.31245	1.48029	-3.43126	9.84e-12	0	-10.7873
RGS1	6.39587	5.3179	5.9761	0.332042	0.7031	0.333066	-3.68202	7.18e-09	0	-12.8351
CDH6	55.1985	45.1651	46.0831	2.42491	3.46647	3.48316	-3.94537	2.11e-14	0	-15.4055
CHGB	6.29049	6.93044	7.57563	0.397279	0.363529	0.26782	-4.34411	4.2e-10	0	-20.3098
IGFBP1	2.09319	1.94557	1.23378	4.9253	4.68733	4.62591	1.4432	0.00040801	0.01	2.71922
CCDC80	3.05201	4.17009	4.26072	8.86325	10.2296	10.4325	1.35508	0.000520713	0.01	2.55812
TTLL6	2.20948	2.24822	2.00489	3.92917	5.85922	5.69912	1.26603	0.000342082	0.01	2.40499
LRRIQ1	7.26452	6.87443	9.59985	16.7616	19.2745	16.7077	1.14704	0.000243659	0.01	2.21459
RIPOR2	5.86154	5.34603	4.67336	12.23	10.9044	9.59902	1.04442	0.000543237	0.01	2.06254
MGAT4C	8.25052	6.70936	6.59261	13.3336	14.6754	13.6387	0.954346	0.000480206	0.01	1.9377
LAMB1	31.8656	30.5058	31.7659	53.4306	55.7687	54.9	0.802135	0.000218916	0.01	1.74368
AKTIP	35.2102	37.2699	36.9495	62.7427	63.4111	59.275	0.759241	0.00059976	0.01	1.6926
CAB39L	22.56	24.471	25.1382	12.8943	13.2183	12.8045	-0.892251	0.000169825	0.01	-1.85607
SIRT6	19.4783	24.6872	23.1719	11.2341	10.4996	12.3974	-0.980353	0.00039401	0.01	-1.97295
GAREM1	6.45402	5.25591	4.89958	2.56612	3.00899	2.40547	-1.0524	0.000498021	0.01	-2.07398
CHD5	11.1171	11.9336	8.99435	5.00914	5.20875	4.84834	-1.08715	0.00018643	0.01	-2.12454
PAX2	10.1171	11.6302	10.4871	5.86608	3.32801	4.84796	-1.20303	0.000360248	0.01	-2.30222
LRRN2	2.5623	2.49086	2.33022	1.1636	0.750014	0.954079	-1.36523	0.000200949	0.01	-2.57617
SLC26A3	2.20948	1.38352	1.58078	0.664085	0.656227	0.518102	-1.48391	0.00025396	0.01	-2.79705
NDST4	1.35442	1.01261	2.21073	0.129499	0.33313	0.481095	-2.20293	0.000390137	0.01	-4.60413
MAPK4	0.465154	1.16734	0.886777	3.32042	2.39054	2.59051	1.68003	0.000942877	0.02	3.20435
UGT2B4	0.882696	1.53753	1.15012	3.56608	3.18283	3.5467	1.51058	0.000640041	0.02	2.84924
YPEL5	12.501	10.4629	13.4559	21.4721	23.8585	22.7225	0.901946	0.000631242	0.02	1.86858
EDN2	12.6755	12.322	12.1835	7.41561	6.89038	5.40306	-0.923507	0.000697768	0.02	-1.89672
KCNAB2	11.1637	12.4949	10.757	6.19813	5.6248	5.99518	-0.949861	0.00107251	0.02	-1.93169
SECTM1	5.1167	9.20905	5.9761	3.20974	2.43741	2.88657	-1.25558	0.000625023	0.02	-2.38763
KIAA0408	2.23891	1.87398	2.23395	1.01245	0.441473	0.960392	-1.38658	0.000788186	0.02	-2.61457
LOC105371485	1.07877	1.29705	0.77111	0.442723	0.14062	0.361791	-1.72055	0.000821853	0.02	-3.29563
FYB2	2.15134	1.81587	1.735	4.42723	3.93736	4.25584	1.15033	0.00124395	0.03	2.21965
TNNI3	4.65154	6.13936	6.30155	12.2856	12.1094	10.9172	1.03963	0.0013328	0.03	2.0557
GPRC5A	7.83895	7.64796	7.53872	12.7284	15.5975	14.3949	0.892836	0.00108061	0.03	1.85682
ZNF736	83.7178	75.34	79.1886	126.639	149.365	134.857	0.78752	0.00121552	0.03	1.7261
ADD3	125.967	104.431	116.014	201.825	203.734	184.034	0.767916	0.0015435	0.03	1.70281
USP43	34.247	33.2477	32.3866	17.7081	19.8377	18.6517	-0.827972	0.00115829	0.03	-1.77519
ZBTB16	32.0252	34.6662	32.5172	18.8974	15.8519	19.9937	-0.856628	0.00114269	0.03	-1.8108
DRAM1	7.23237	8.78073	8.32364	4.269	4.34997	4.26339	-0.919663	0.0011108	0.03	-1.89167
SYNPO2	3.62652	3.65735	3.26683	1.3512	1.50904	1.56758	-1.24388	0.00139771	0.03	-2.36835
CLSTN2	1.07642	0.736746	0.803187	0.232389	0.394226	0.297277	-1.4586	0.00164599	0.04	-2.74842
