# Supplementary material for: MEIS-mediated suppression of human prostate cancer growth and metastasis through HOXB13-dependent regulation of proteoglycans
Source: eLife. 2020 Jun 18;9:e53600. doi: 10.7554/eLife.53600 (PMC7371429; doi:10.7554/eLife.53600)
Supplement: Supplementary file 6. — The top 20 enriched gene sets from CWR22Rv1 RNA-seq of GSEA on the Gene Ontology: Biological Processes collection from MSigDB. [file elife-53600-supp6.xlsx]

## Sheet: gsea_report_for_MEIS1_154481744
NAME	SIZE	ES	NES	NOM p-val	FDR q-val	FWER p-val	RANK AT MAX	LEADING EDGE
GO_REGULATION_OF_EPITHELIAL_TO_MESENCHYMAL_TRANSITION	51	0.567857	1.94159	0	0.0172207	0.018	2352	tags=41%, list=17%, signal=49%
GO_RESPONSE_TO_FATTY_ACID	55	0.546096	1.88169	0	0.0269563	0.055	1606	tags=31%, list=12%, signal=35%
GO_CELL_CELL_ADHESION_VIA_PLASMA_MEMBRANE_ADHESION_MOLECULES	129	0.452099	1.83316	0	0.0370473	0.111	2726	tags=42%, list=20%, signal=52%
GO_HOMOPHILIC_CELL_ADHESION_VIA_PLASMA_MEMBRANE_ADHESION_MOLECULES	107	0.463332	1.83205	0	0.0284931	0.114	2677	tags=42%, list=19%, signal=52%
GO_GROWTH_FACTOR_BINDING	75	0.467904	1.72376	0.00200803	0.0789195	0.396	2020	tags=40%, list=14%, signal=47%
GO_SYNAPSE_ASSEMBLY	50	0.497767	1.69904	0.00204082	0.0930463	0.502	2281	tags=38%, list=16%, signal=45%
GO_REGULATION_OF_STEM_CELL_DIFFERENTIATION	80	0.447343	1.67347	0.004158	0.112317	0.625	2479	tags=38%, list=18%, signal=45%
GO_BLOOD_VESSEL_MORPHOGENESIS	236	0.37536	1.62734	0.00211416	0.172944	0.816	2413	tags=30%, list=17%, signal=36%
GO_CELL_SUBSTRATE_ADHESION	114	0.402527	1.60663	0.00446429	0.200275	0.882	2183	tags=32%, list=16%, signal=38%
GO_NEGATIVE_REGULATION_OF_IMMUNE_EFFECTOR_PROCESS	54	0.458387	1.60045	0.0118812	0.19438	0.897	2572	tags=39%, list=18%, signal=47%
GO_RHO_GUANYL_NUCLEOTIDE_EXCHANGE_FACTOR_ACTIVITY	63	0.451269	1.59918	0.00994036	0.180553	0.9	2193	tags=32%, list=16%, signal=37%
GO_CILIUM_MORPHOGENESIS	163	0.383755	1.5991	0.00218341	0.166884	0.901	4366	tags=50%, list=31%, signal=71%
GO_ANGIOGENESIS	190	0.375839	1.5969	0.00222717	0.15904	0.905	2264	tags=29%, list=16%, signal=34%
GO_POSITIVE_REGULATION_OF_AUTOPHAGY	69	0.435999	1.5796	0.00840336	0.180796	0.945	2694	tags=28%, list=19%, signal=34%
GO_CILIUM_ORGANIZATION	147	0.38411	1.5747	0.00215054	0.180012	0.956	4366	tags=50%, list=31%, signal=72%
GO_INTEGRIN_MEDIATED_SIGNALING_PATHWAY	56	0.447316	1.56439	0.00613497	0.188423	0.971	1786	tags=32%, list=13%, signal=37%
GO_RAS_PROTEIN_SIGNAL_TRANSDUCTION	126	0.389398	1.56274	0	0.181148	0.973	2314	tags=25%, list=17%, signal=29%
GO_PEPTIDASE_INHIBITOR_ACTIVITY	68	0.428572	1.56132	0.0103734	0.175097	0.974	1821	tags=31%, list=13%, signal=35%
GO_CELL_MATRIX_ADHESION	75	0.414583	1.5528	0.0107991	0.183491	0.981	2123	tags=33%, list=15%, signal=39%
GO_REGULATION_OF_CELLULAR_RESPONSE_TO_TRANSFORMING_GROWTH_FACTOR_BETA_STIMULUS	75	0.429817	1.54272	0.00873363	0.195233	0.986	1371	tags=23%, list=10%, signal=25%
