# Supplementary figures and images for: MEIS-mediated suppression of human prostate cancer growth and metastasis through HOXB13-dependent regulation of proteoglycans
Source: eLife journal article supplement (doi:10.7554/elife.53600), 2020-06-18

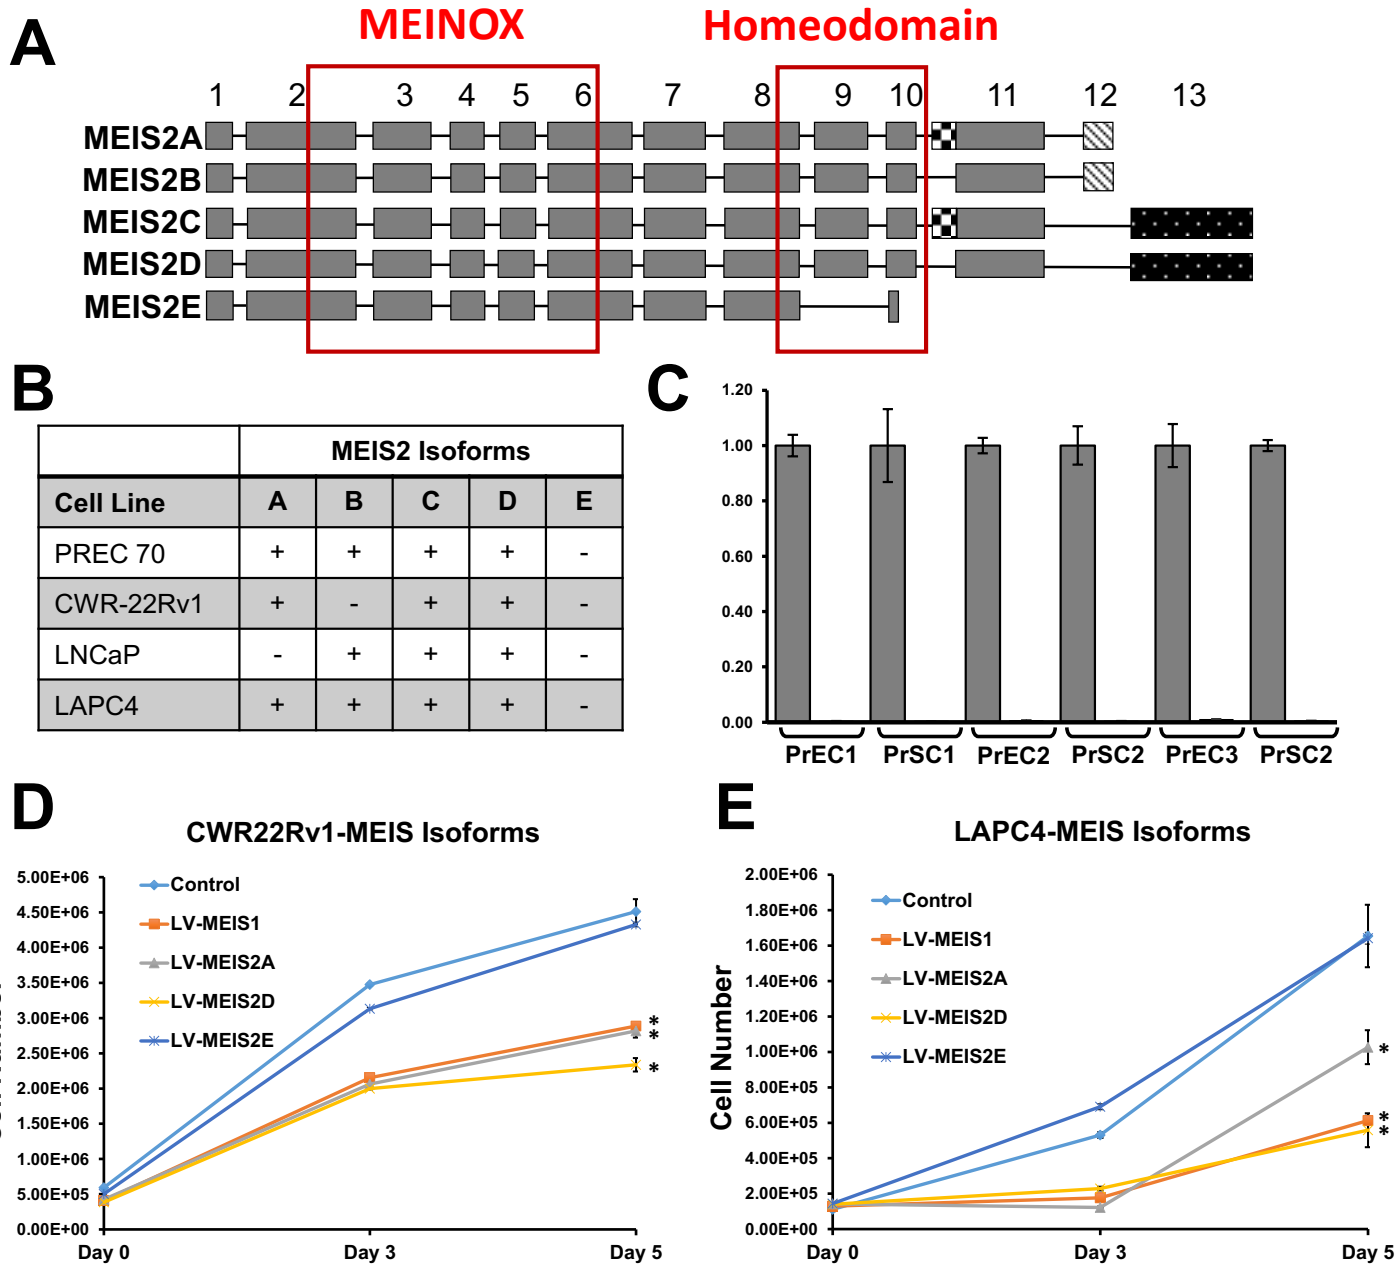

**FIGURE S2**

Supplement: supp [file elife_poa_e53600_Figure_1_figure_supplement_1.pdf › elife_poa_e53600_Figure_1_figure_supplement_1.pdf]

**FIGURE S1**

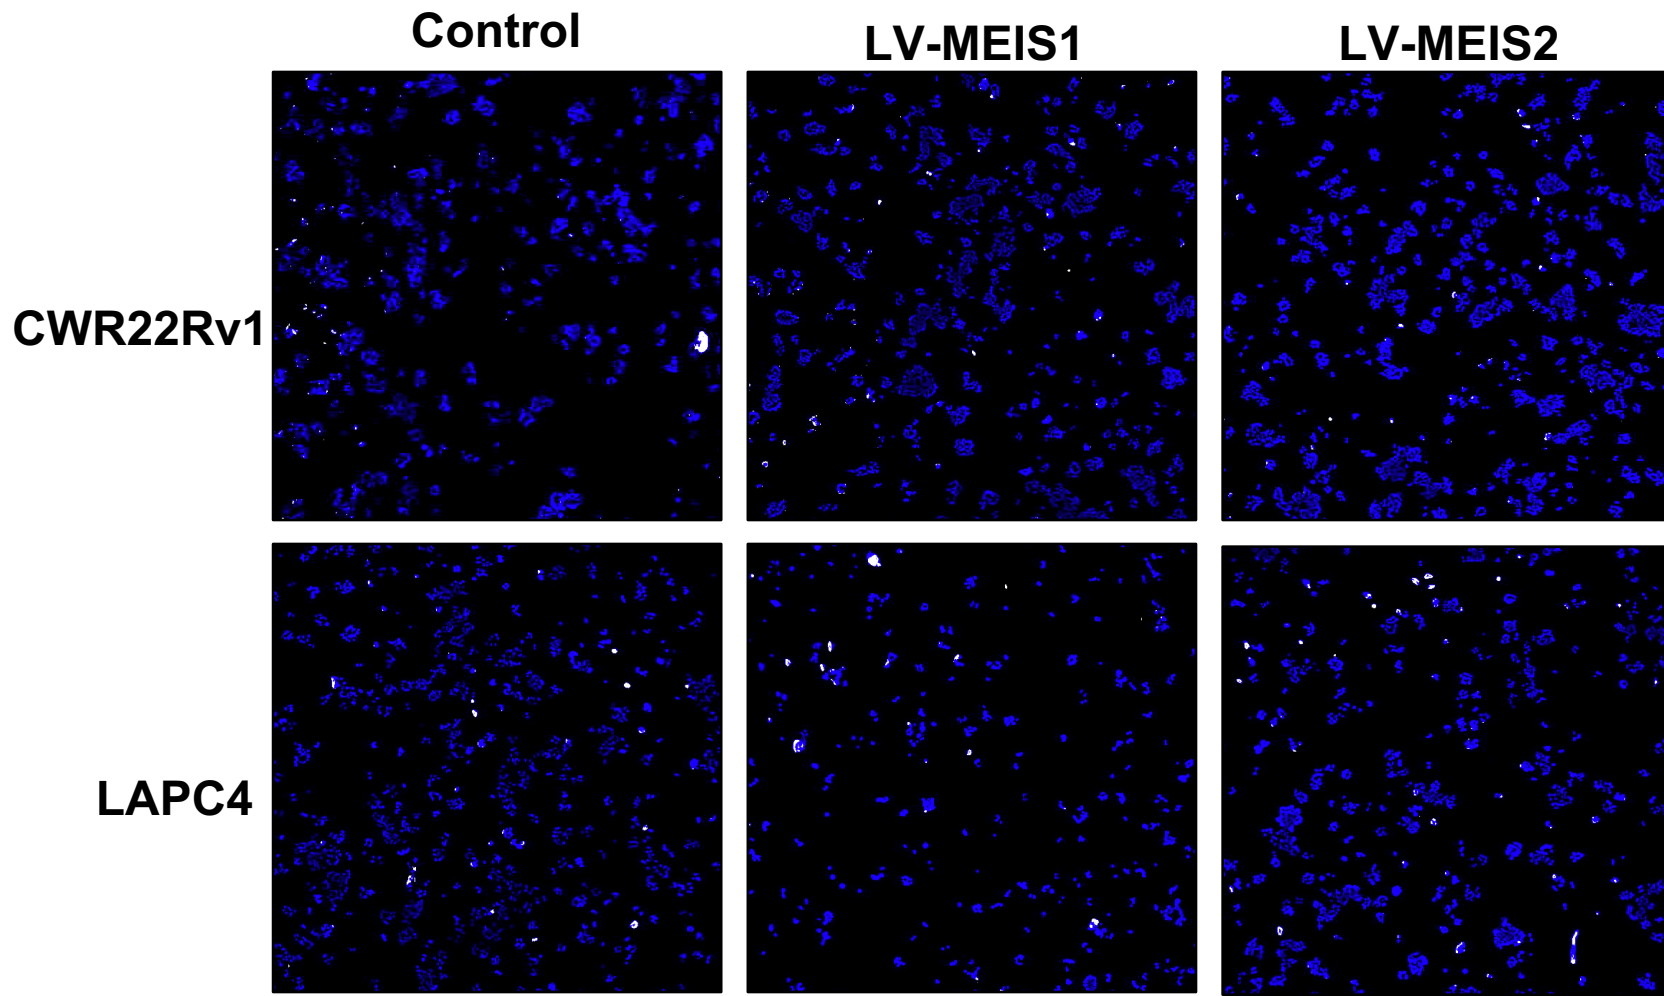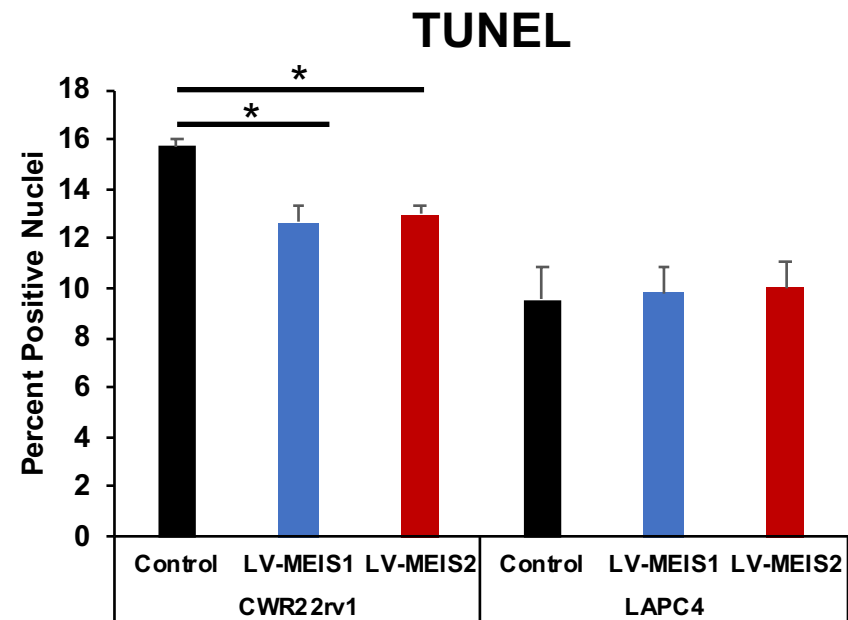

Supplement: supp [file elife_poa_e53600_Figure_1_figure_supplement_2.pdf › elife_poa_e53600_Figure_1_figure_supplement_2.pdf]

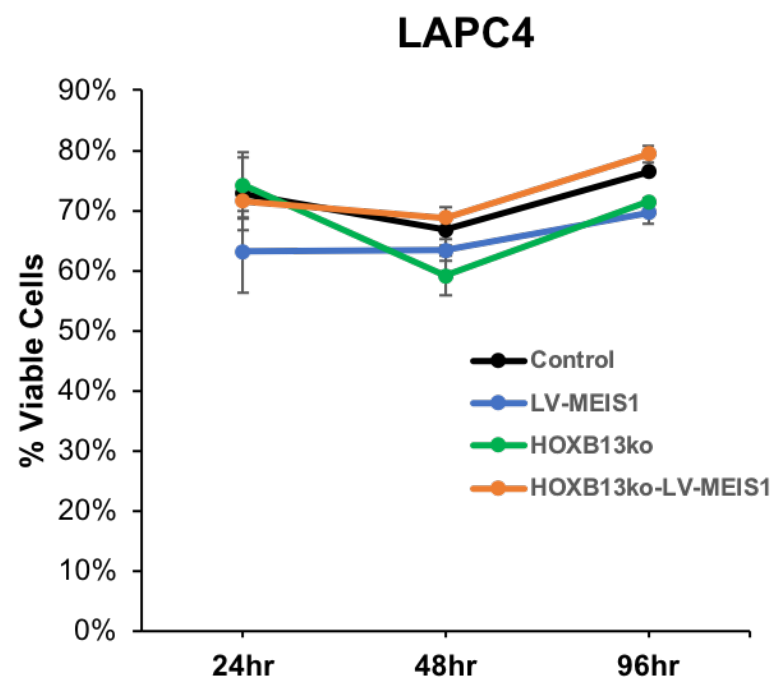

**FIGURE S3**

Supplement: supp [file elife_poa_e53600_Figure_3_figure_supplement_1.pdf › elife_poa_e53600_Figure_3_figure_supplement_1.pdf]

A.

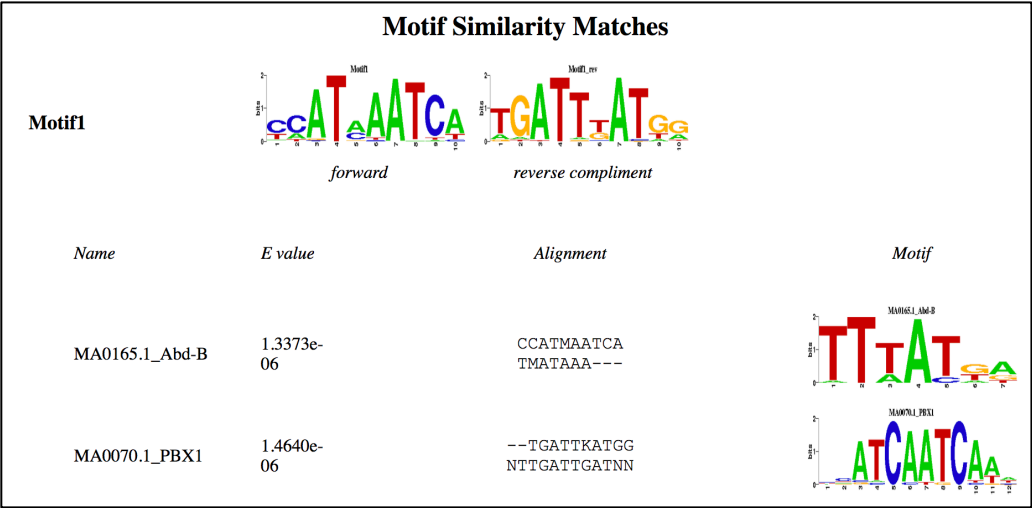

B.

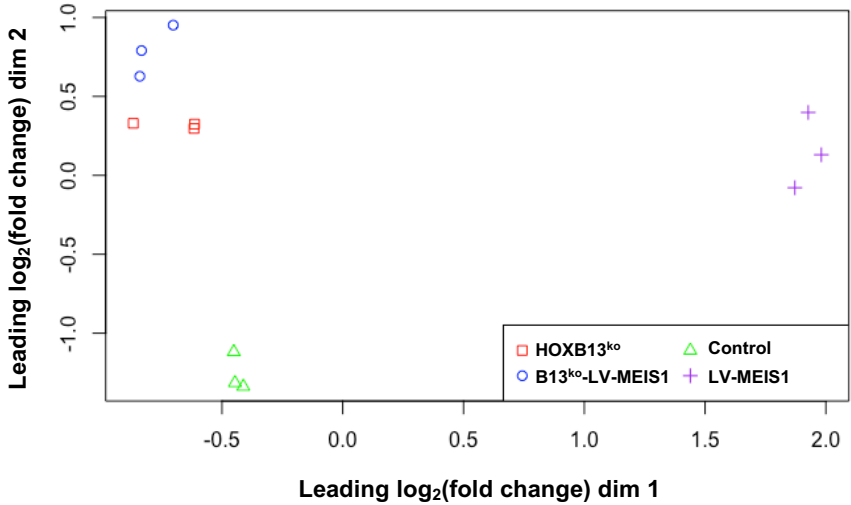

C.

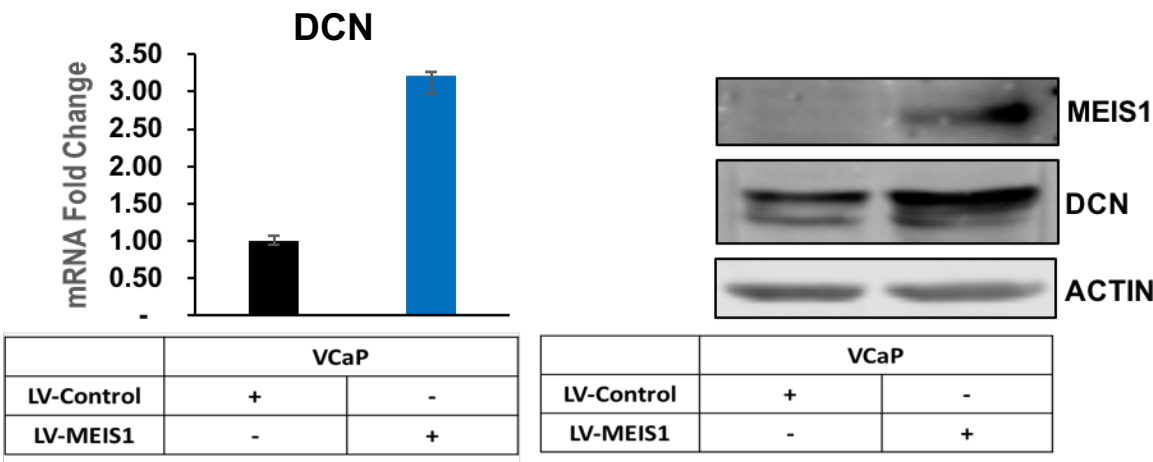

FIGURE S4

Supplement: supp [file elife_poa_e53600_Figure_5_figure_supplement_1.pdf › elife_poa_e53600_Figure_5_figure_supplement_1.pdf]
